# Supplementary material for: How spatial release from masking may fail to function in a highly directional auditory system
Source: eLife. 2017 Apr 25;6:e20731. doi: 10.7554/eLife.20731 (PMC5443663; doi:10.7554/eLife.20731)
Supplement: Figure 2—source data 1. — Masker presentation started and ended 0.5 and 4.5 s after the onset of data acquisition, respectively. Signal presentation started and ended 1.0 and 4.0 s after the onset of data acquisition, respectively. Data plotted in Figure 2A. DOI: http://dx.doi.org/10.7554/eLife.20731.004 [file elife-20731-fig2-data1.xlsx]

## Sheet: Response to noise alone trans
Time	Fly1	Fly2	Fly3	Fly4	Fly5	Fly6	Fly10	Fly11	Fly12	Fly13
9.04816	1.17769e-05	2.78494e-05	-0.0187579	-1.28064e-06	0.00124375	-8.24715e-06	0.00167021	1.7588e-05	-1.15907e-05	-8.92894e-06
20.6654	-2.83117e-05	-3.13378e-05	-0.0121721	-1.28482e-06	-0.00150962	7.86278e-06	-0.00148368	-1.03893e-05	-5.3671e-06	5.43737e-06
32.0169	4.20024e-05	2.54841e-05	0.439177	4.48011e-06	0.00136677	-4.60782e-06	0.00070807	-3.39981e-06	2.75654e-05	1.38803e-06
43.516	-4.69412e-05	-8.39995e-06	0.178392	-7.46731e-06	-0.000691827	-1.59615e-06	0.000635355	2.17826e-05	-4.95446e-05	-1.05888e-05
54.9464	3.77667e-05	-1.87223e-05	0.00590889	9.1299e-06	-0.000507719	9.84392e-06	-0.00232111	-4.0344e-05	6.36381e-05	1.99871e-05
66.3754	-1.17402e-05	5.07319e-05	0.981171	-8.34102e-06	0.00203831	-1.81475e-05	0.00391231	5.27616e-05	-6.16914e-05	-2.64264e-05
77.8637	-2.92145e-05	-7.86404e-05	0.516848	4.3476e-06	-0.00350449	2.36683e-05	-0.00482275	-5.21869e-05	3.76691e-05	2.64502e-05
89.2613	7.72239e-05	9.11145e-05	0.211042	2.81389e-06	0.00435991	-2.33403e-05	0.00445492	3.3386e-05	9.37962e-06	-1.7368e-05
100.751	-0.000118692	-7.74018e-05	0.477742	-1.19999e-05	-0.00404383	1.4831e-05	-0.00239824	4.78207e-06	-7.28671e-05	-1.49733e-06
112.171	0.000136591	3.12795e-05	-0.107434	2.08908e-05	0.00218908	2.34764e-06	-0.00135334	-5.72603e-05	0.000137786	2.77345e-05
123.626	-0.000114898	4.49074e-05	0.0848818	-2.62992e-05	0.00115778	-2.58998e-05	0.00622536	0.000111946	-0.000182361	-5.53832e-05
135.079	4.45355e-05	-0.000137472	-0.0936633	2.4905e-05	-0.00537281	5.03733e-05	-0.0110028	-0.000150914	0.000182723	7.55045e-05
146.511	7.05957e-05	0.000221361	0.119788	-1.43445e-05	0.00931305	-6.77184e-05	0.0139643	0.000154165	-0.000120261	-7.8016e-05
157.976	-0.000209535	-0.000264032	0.557722	-5.57533e-06	-0.0117149	6.89763e-05	-0.0132731	-0.000105641	-9.76687e-06	5.46888e-05
169.408	0.00033435	0.000233544	-0.381622	3.19026e-05	0.0117592	-4.69864e-05	0.0076143	4.17905e-07	0.000190798	-2.7587e-06
180.864	-0.000396115	-0.000109814	0.0109444	-5.82428e-05	-0.00893684	-3.92872e-07	0.00306987	0.000148949	-0.000381763	-7.18349e-05
192.307	0.000347177	-0.000103501	0.384513	7.55229e-05	0.00126788	6.74461e-05	-0.0168914	-0.000309436	0.000520989	0.000152856
203.753	-0.000158121	0.000370327	0.100421	-7.39981e-05	0.0110478	-0.000139285	0.029991	0.000430369	-0.00053885	-0.000215065
215.204	-0.00016447	-0.000621062	0.583962	4.63301e-05	-0.0266642	0.000193147	-0.0375626	-0.000453515	0.000378448	0.000229156
226.645	0.000565224	0.00076255	0.55808	8.87598e-06	0.0451843	-0.000202957	0.0363119	0.000330007	-2.05675e-05	-0.000170167
238.098	-0.000938694	-0.000700379	0.434085	-8.4103e-05	-0.06507	0.000146932	-0.0259483	-4.11304e-05	-0.00049395	2.78942e-05
249.541	0.0011448	0.000370907	0.291368	0.000161787	0.0824697	-1.68854e-05	0.0022815	-0.000382609	0.00105323	0.000183434
260.989	-0.00104263	0.000223972	0.171617	-0.000216175	0.138627	-0.000173304	0.0288783	0.000851474	-0.00148332	-0.00041989
272.436	0.00053864	-0.00099023	-0.0789373	0.000218794	-0.188216	0.000383297	-0.0700722	-0.00122281	0.00158231	0.000610592
283.882	0.00036155	0.00173576	-0.0830238	-0.000147138	-0.0106853	-0.000549145	0.116151	0.00132824	-0.00117802	-0.000670818
295.331	-0.00151379	-0.00219556	0.616592	-5.10362e-06	0.0346819	0.000595371	-0.173483	-0.00102083	0.000199304	0.00052524
306.776	0.0026271	0.00209204	-0.0702542	0.00021916	-0.0375257	-0.00045593	0.381591	0.000234055	0.00125791	-0.000137584
318.224	-0.00330187	-0.00122447	-0.150796	-0.00044725	0.0334351	0.000100653	0.360534	0.000962542	-0.00289376	-0.000460542
329.67	0.00312089	-0.000430437	0.357484	0.000616927	-0.0269641	0.000439343	-0.236374	-0.0023309	0.00422074	0.00115159
341.117	-0.00178485	0.00263524	-0.223112	-0.000645495	0.0191618	-0.00105569	0.662135	0.00347432	-0.00464918	-0.00173517
352.564	-0.000733359	-0.0048596	0.262155	0.000463733	-0.0112649	0.00156529	-0.322078	-0.00390261	0.00364417	0.00196121
364.011	0.0040577	0.00633283	0.447653	-4.49334e-05	0.00376541	-0.00174257	-0.505023	0.0031553	-0.000938809	-0.00159772
375.458	-0.00736293	-0.00621138	-0.141592	-0.000567541	0.00496283	0.00138325	0.44122	-0.000977502	-0.00324212	0.000524576
386.905	0.00947559	0.00385937	0.183015	0.00124329	-0.0145786	-0.000394094	0.101526	-0.0024824	0.00803038	0.00117027
398.352	-0.00916444	0.000807711	0.929982	-0.00177063	0.0235844	-0.00113553	0.842812	0.00651998	-0.011959	-0.00314141
409.799	0.00556112	-0.00706964	1.19261	0.00189548	-0.0297639	0.00288662	0.871021	-0.00989847	0.0132696	0.00480622
421.245	0.00138655	0.0133398	1.37343	-0.00140135	0.0305852	-0.00424177	0.85973	0.0110992	-0.0104481	-0.00545609
432.692	-0.0104089	-0.0173036	1.78551	0.000208871	-0.0239071	0.00474036	1.18334	-0.00872407	0.00319181	0.00464216
444.139	0.0193416	0.0171709	1.95698	0.00152366	0.00951656	-0.00399726	0.943174	0.00265097	0.00728653	-0.00218548
455.586	-0.0256014	-0.0120892	1.91297	-0.00332543	0.011528	0.00238951	1.04648	0.00571542	-0.0185078	-0.00160476
467.033	0.0277868	0.00298809	1.55548	0.00464201	-0.0385029	0.0010101	0.468672	-0.0136112	0.0295455	0.00720771
478.48	-0.0231314	0.0119729	1.35966	-0.00494214	0.0654809	-0.00984774	0.295416	0.0216388	-0.0408952	-0.0147354
489.927	0.000583792	-0.0387257	1.33163	0.00438408	-0.0984532	0.0059566	0.56659	-0.0347567	0.0372233	0.0154604
501.374	0.0169996	0.0448197	1.27429	-0.00252959	0.101095	-0.0229351	0.441482	0.0277108	-0.0349975	-0.0246547
512.821	-0.0622874	-0.0795951	1.20454	-0.00242127	-0.103002	0.0136904	0.667629	-0.0376946	0.00126942	0.0113737
524.267	0.0910304	0.066182	1.03065	0.00395078	0.026126	-0.0420628	0.750975	0.0156378	0.0393217	-0.00954339
535.714	-0.162365	-0.0837614	0.901457	-0.0183113	0.441929	0.0858229	0.941814	-0.014067	-0.158246	-0.0514338
547.161	0.331663	0.0112743	0.647886	0.0183166	0.0146284	0.815526	1.46811	-0.0847897	0.769222	0.37047
558.608	1.29023	1.58144	0.667622	-0.052061	1.51908	1.70226	1.74044	1.32377	1.11732	0.840459
570.055	1.6342	2.684	0.383071	0.0573917	2.35675	2.38889	1.52235	2.12187	1.05209	1.35513
581.502	2.04615	3.43103	-0.0881379	0.370495	1.97615	2.61293	1.50248	2.02547	1.79775	1.875
592.949	2.19733	3.96671	0.00448678	0.666931	2.96665	2.91234	1.48414	2.73474	1.54287	2.26583
604.396	2.87163	4.22752	0.0528435	1.40526	3.37793	3.12802	1.02508	3.16107	1.56283	2.78754
615.842	3.19484	4.83296	-0.158791	2.13599	3.68138	2.64841	0.841775	3.95736	2.17163	3.10899
627.289	3.27612	4.6955	-0.434347	2.88194	4.0157	2.74821	0.908277	3.85953	2.41498	3.38208
638.736	3.62794	4.61294	-0.35833	3.6241	4.56097	3.30159	1.38082	4.35466	2.58404	3.77184
650.183	3.31849	4.41894	-0.276903	3.4861	5.07048	3.39019	1.57119	5.18516	2.62483	3.98411
661.63	3.76893	3.71635	-0.340776	3.7523	4.94239	3.32548	2.11351	2.77244	2.92068	4.31538
673.077	4.05472	3.62534	-0.216096	4.25784	5.23308	3.35794	1.40668	3.98732	2.98599	5.01569
684.524	3.97284	3.28835	-0.286166	4.74886	5.36623	3.3435	-0.552749	5.54757	3.12703	5.51943
695.971	4.45012	2.78207	-0.368789	5.07208	5.26248	3.26376	1.24556	5.1008	3.30302	5.45393
707.418	4.34604	2.65723	-0.241764	4.92797	5.33824	3.74394	2.62737	7.00607	3.08214	5.43899
718.864	4.29419	2.573	-0.323231	6.56481	5.2127	3.65707	2.40184	3.80795	3.20053	5.83411
730.311	4.32496	2.58001	-0.330334	4.27008	5.04922	3.37996	3.10715	3.14181	3.03844	6.27467
741.758	3.93991	2.67151	0.0114997	2.29546	5.93948	3.9953	2.89545	6.81785	2.78005	6.38903
753.205	4.14376	2.61466	0.0291166	6.42522	4.25256	3.85982	3.4138	6.52413	2.76094	5.95239
764.652	4.38151	2.46588	-0.0318936	6.51946	2.40194	3.76523	3.44495	7.0217	2.80977	5.66066
776.099	4.51844	2.67299	0.027588	5.98358	3.78618	3.71599	2.99012	6.67282	2.64784	6.05512
787.546	5.06095	2.70735	-0.0164201	6.96134	2.59052	3.63687	3.48379	6.55509	2.06483	6.20752
798.993	5.09036	2.69539	0.00879549	6.21725	2.77792	4.07001	3.64368	7.32889	2.03634	5.91084
810.44	4.86212	2.78609	-0.00020324	5.98218	4.10672	3.70713	3.99515	6.87946	1.86201	5.82808
821.886	4.2339	2.64721	-0.00405748	6.06297	3.0688	3.68452	3.93323	6.60773	1.56476	5.93013
833.333	4.09114	2.93187	0.00595003	5.95618	3.05991	3.84147	3.77331	6.16899	1.39309	5.67492
844.78	4.47638	3.1211	-0.00633357	4.9247	2.71032	3.72796	4.08997	6.73433	1.33603	5.29674
856.227	4.2127	3.21521	0.00535108	4.67442	2.53149	3.78685	4.14351	5.64757	1.27594	5.54439
867.674	4.71203	3.37236	-0.00343238	1.95279	2.4716	3.4969	4.28785	5.53912	0.196513	5.6444
879.121	4.76817	3.20783	0.00123444	-0.665318	2.04013	3.53105	4.28328	7.15493	0.190319	5.30021
890.568	4.07663	3.14592	0.000591311	-0.0172012	1.86696	3.32673	3.89724	5.64475	0.5106	5.15952
902.015	4.06809	2.92876	-0.00168381	-0.197111	1.45439	3.20287	3.62342	4.88598	-0.518603	5.15014
913.462	4.00876	2.72663	0.00199615	0.626933	1.61544	3.47373	3.5029	4.37767	-0.830264	5.10065
924.908	3.80143	2.52058	-0.00172742	-1.32413	1.25343	3.03892	3.29432	1.92994	-0.683559	4.62342
936.355	3.53718	2.73238	0.00119247	-1.87635	1.17181	3.12279	3.16212	0.527223	-0.492419	4.44359
947.802	3.70101	3.20116	-0.00068407	0.341356	1.74642	3.40887	3.26318	-0.526042	-0.544022	4.71629
959.249	3.73844	2.82725	0.000377004	-0.602842	1.59951	2.95691	3.15734	-2.10242	-0.463831	4.40957
970.696	3.42361	2.96793	-0.000291466	0.0555428	1.64322	2.92642	2.6582	-2.4112	0.12066	4.3708
982.143	3.44454	3.42758	0.000312702	0.0772731	1.84002	2.80169	2.22098	-1.85214	-0.12218	4.51614
993.59	2.97264	3.32535	-0.000252914	-0.660024	1.99285	2.63479	1.44564	-1.76894	0.179462	4.4002
1005.04	3.0892	3.25365	-6.35402e-05	-0.293517	2.22909	2.63803	0.519771	-1.51482	0.411762	4.35915
1016.48	3.09263	3.16467	0.00071449	-0.279682	2.42341	2.27039	0.0703099	-1.34232	0.0914236	3.9881
1027.93	2.76659	3.11494	-0.00161798	0.145862	2.41978	2.38445	-0.572652	-1.11884	0.444442	3.98678
1039.38	3.43613	3.16959	0.00251541	-0.0635674	2.48172	2.39041	-1.01057	-0.835876	0.0895209	3.86144
1050.82	3.53192	3.23557	-0.00301372	-0.00220912	2.7437	1.9366	-0.738418	-0.776335	-0.0941404	3.57546
1062.27	3.60993	3.22749	0.00268948	0.0414008	2.8702	1.94685	-0.629079	-0.134373	0.0805058	3.83258
1073.72	3.68713	3.60659	-0.001245	-0.0680686	3.10696	1.69524	-0.389975	-0.0378833	-0.060697	3.61001
1085.16	3.67146	3.58916	-0.00131774	0.082181	3.23968	1.11707	-0.0192505	0.31301	0.0355029	3.35716
1096.61	4.12698	2.9362	0.00456128	-0.11426	3.29401	0.873362	-0.0527052	0.890479	-0.0148938	3.1885
1108.06	3.91046	3.2046	-0.00760261	0.533199	3.51783	0.391677	0.330939	0.496142	-0.00439952	2.90918
1119.51	3.71043	3.33128	0.00926021	0.823341	3.44251	-0.101692	0.341286	0.442641	0.0154098	2.91325
1130.95	4.36144	2.88717	-0.00835038	0.564359	3.42493	0.057697	-0.0923438	0.162115	-0.0202238	2.41747
1142.4	4.4545	2.94423	0.00439958	0.828321	3.65329	-0.211502	0.0302402	-0.076906	0.0191893	1.89164
1153.85	4.25458	2.98223	0.00225551	0.53263	3.36914	-0.819674	0.00328712	0.0201337	-0.0134329	1.76466
1165.29	4.80303	2.72745	-0.0102696	0.349173	3.15097	-0.599893	-0.0192676	0.0242021	0.0054177	1.03188
1176.74	4.75029	2.70241	0.0193743	0.911101	3.23365	-0.554881	0.0249624	-0.0517777	0.0021106	0.407448
1188.19	4.82172	3.26867	-0.0293267	1.32853	3.49993	-0.495624	-0.0256149	-0.751487	-0.00701908	0.337261
1199.63	5.07425	3.40577	0.0252816	1.56873	3.95139	-0.572364	0.0187484	-0.867206	0.00831978	-0.382587
1211.08	4.904	3.02571	-0.0299425	2.13828	3.52909	-0.691585	-0.0110401	0.168696	-0.00616965	-1.01487
1222.53	5.18793	3.15591	0.00272746	2.27057	3.5876	0.145126	0.00256616	0.430381	0.00166726	-0.9692
1233.97	5.08262	3.14953	0.0110686	2.25185	4.00139	-0.11777	0.00561393	-0.10712	0.00349115	-1.22176
1245.42	5.3024	3.15011	-0.0934699	2.65206	3.09085	-0.451522	-0.0116232	0.30672	-0.00743685	-1.16675
1256.87	5.61314	3.36773	0.628283	2.56188	3.08449	-0.0631828	0.0140014	0.372374	0.00859083	-0.587167
1268.31	5.31296	3.30445	1.29045	2.99935	3.49074	0.0510553	-0.0122281	-0.0951868	-0.00610738	-0.43373
1279.76	5.26431	3.25628	1.7988	3.58657	3.44535	0.463221	0.0067725	0.02568	0.000299715	-0.354576
1291.21	5.55343	3.27561	2.35447	3.8965	4.00301	0.110298	0.00103362	0.0126566	0.00735106	-0.0160239
1302.66	5.96938	3.28458	2.65458	3.5902	3.60362	-0.0666118	-0.00928676	-0.034469	-0.0147491	0.0552745
1314.1	5.62866	3.12383	3.20051	2.90109	3.1155	0.0435827	0.0161304	0.0287203	0.0205725	-0.0560285
1325.55	5.52406	2.66536	3.11047	3.87957	3.03093	-0.0353693	-0.0205314	0.0138784	-0.0240946	0.055893
1337	5.8944	2.51617	2.88969	4.17387	2.59229	0.0415195	0.0216545	-0.309018	0.0190444	-0.031579
1348.44	6.00668	2.83262	2.64912	3.88829	2.73809	-0.0680471	-0.0137483	-0.385014	-0.0073892	-0.0198996
1359.89	6.06915	2.75843	1.99375	3.90478	2.81774	0.0983897	0.000916041	0.241879	-0.0183448	0.435385
1371.34	5.35985	2.42348	1.63333	3.54354	2.67077	-0.145944	0.0205788	0.415722	0.0543196	0.201129
1382.78	5.15148	2.15132	1.81075	3.84375	2.6902	0.183086	-0.0553774	0.0323769	-0.119845	-0.0943013
1394.23	5.2405	1.75225	2.52407	3.46509	2.53328	0.326998	0.101396	-0.0400455	0.29435	0.0506774
1405.68	5.30374	1.40943	2.63691	3.13157	2.39982	0.228303	-0.221745	0.0331071	0.359696	-0.0229299
1417.12	5.65879	1.11311	2.72371	3.18713	2.26739	0.824672	-0.40767	-0.012459	-0.0205638	0.00393932
1428.57	5.26271	0.889748	2.93309	2.5452	2.27761	0.337298	-0.0290207	-0.0822391	0.435453	0.00729546
1440.02	5.66386	0.480203	2.66527	2.07803	2.00581	0.711766	0.125424	-0.0392765	0.43997	-0.0144405
1451.47	6.15079	0.352921	2.512	1.20644	1.66786	0.861131	0.498623	0.146771	0.253063	0.0140796
1462.91	5.53644	0.166003	1.71744	0.454617	1.63274	0.467164	0.760545	-0.00768957	0.59159	-0.0119318
1474.36	5.33187	-0.660972	1.13984	-0.252747	1.272	0.884254	0.826077	-0.218099	0.575538	0.00842751
1485.81	5.37613	-0.529536	0.73327	-1.6181	1.12929	0.557426	0.871943	0.0802607	0.484115	-0.0039221
1497.25	5.61056	-0.743924	0.224632	-1.94877	0.614517	0.758342	0.807133	0.0666811	0.987002	-0.000447598
1508.7	5.96639	-1.52368	0.286166	-1.69024	-0.0326034	0.555326	0.983814	-0.0960622	0.980367	0.00358584
1520.15	5.89291	-1.00934	0.337685	-1.47603	-0.0306868	-0.11039	1.11159	0.0274604	0.720458	-0.00496403
1531.59	6.15307	-0.850599	0.375143	-1.05461	-0.179208	0.0170558	1.08914	0.000463007	0.91217	0.00471378
1543.04	6.13745	-1.02454	-0.332564	-1.26835	-0.652582	0.0475487	1.11454	-0.129135	0.00969384	-0.00336059
1554.49	5.96162	-0.968924	-0.375374	-1.36425	-1.03613	-0.134509	1.05118	0.00252339	-0.12686	0.00157043
1565.93	6.44365	-0.856102	0.145508	-1.02309	-0.430459	-0.437887	1.05618	0.266775	0.313134	7.58221e-05
1577.38	6.13666	-0.580227	-0.0660845	-0.919349	-0.251848	-0.0677841	1.04391	-0.269678	-0.100129	-0.00121276
1588.83	6.27597	-0.74477	0.0103371	-0.763162	-0.49143	0.109284	0.878318	-0.356125	0.102126	0.00171492
1600.27	6.50544	-0.696247	0.0207439	-0.445836	-0.215889	-0.128091	0.780857	0.505621	-0.359787	-0.0016507
1611.72	5.9352	-0.571489	-0.0284723	-0.398598	-0.420771	0.143948	0.721882	0.116987	-0.297909	0.00120477
1623.17	5.71316	-0.236119	-0.00730837	-0.669076	-0.195974	-0.189461	0.505572	-0.22463	-0.0129181	-0.000598463
1634.62	5.04777	-0.0901824	0.281781	-0.413089	0.0976681	-0.444366	0.466048	0.258467	-0.524565	2.60064e-05
1646.06	5.03534	-0.454962	0.394231	-0.0286118	-0.0554752	0.00535733	0.730753	-0.18844	0.0129316	0.000383932
1657.51	5.09452	-0.0387137	-0.167815	0.0544152	0.0312859	0.0200358	0.307973	-0.349204	0.0631698	-0.000579847
1668.96	4.36023	0.0727396	0.0646347	-0.0410152	-0.00991312	-0.0237471	0.137066	-0.00468549	-0.104963	0.000577214
1680.4	3.20242	-0.0682119	0.0511955	-0.0341299	-0.00231597	0.0218324	0.502106	-0.174822	0.13153	-0.00043512
1691.85	2.19207	0.0578318	-0.504434	0.390648	0.0130856	-0.0177208	-0.0623304	0.341709	-0.146325	0.000229156
1703.3	2.46758	-0.0373026	0.198523	0.201583	-0.0161888	0.0139971	0.0550734	0.315247	0.17791	-2.82009e-05
1714.74	2.17369	0.0183826	0.286766	0.383687	0.0157454	-0.00763569	-0.0474582	0.00619753	0.44553	-0.000120374
1726.19	2.31264	-0.000289576	0.0835471	1.01704	-0.0122863	0.00385397	-0.491534	0.795155	0.0124044	0.000195892
1737.64	2.91632	-0.0103968	0.951226	1.26445	0.00677192	0.000156626	-0.0339071	0.781017	-0.0210664	-0.000201532
1749.08	2.88013	0.0159797	1.04796	1.73426	-0.00100615	-0.00415718	-0.480392	0.803583	0.0145544	0.000156526
1760.53	3.52452	-0.0169113	0.713452	1.84285	-0.00344499	0.00694684	-0.0841567	0.879876	-0.00968982	-8.67468e-05
1771.98	3.52985	0.0137331	0.875242	1.81569	0.0057587	-0.0079217	-0.028487	0.962709	0.00934002	1.64621e-05
1783.42	3.42848	-0.00809182	0.594412	2.00622	-0.00596479	0.007121	-0.576865	1.35061	-0.0141058	3.71024e-05
1794.87	3.43785	0.00201146	0.205925	1.93177	0.00463167	-0.00489382	0.150884	1.22157	0.0190381	-6.5859e-05
1806.32	3.63712	0.00283482	0.571466	1.81439	-0.00255153	0.00161652	-0.347301	1.56175	-0.0279399	7.01286e-05
1817.77	4.01777	-0.0055795	0.955351	2.20871	0.000464067	0.00227787	-0.361243	1.57681	0.0298241	-5.60962e-05
1829.21	3.77217	0.00614374	1.56179	2.51301	0.00111666	-0.00620706	0.145658	1.63963	-0.0308472	3.25685e-05
1840.66	3.93308	-0.00502949	1.90088	2.23429	-0.00195742	0.00936421	-0.097907	1.90555	0.0197466	-8.06127e-06
1852.11	3.5068	0.00301313	2.00944	2.04332	0.0020743	-0.0107472	0.0751583	1.7246	0.000345785	-1.11785e-05
1863.55	3.12101	-0.000859853	2.69539	2.01278	-0.00165243	0.0095431	-0.0643189	2.04063	-0.0579359	2.20289e-05
1875	2.85445	-0.000863905	2.72673	1.93028	0.000951519	-0.00560357	0.0540011	1.98352	0.377159	-2.43257e-05
1886.45	1.79804	0.00186719	2.84863	2.06898	-0.000222149	-0.000419812	-0.0450807	1.94624	0.343869	2.00339e-05
1897.89	1.08842	-0.00212051	3.14821	2.0761	-0.000351142	0.00836747	0.0063232	2.07547	0.49204	-1.21418e-05
1909.34	0.650362	0.00178443	3.1039	1.78294	0.000674481	-0.0201836	0.422652	2.01706	0.452751	3.62316e-06
1920.79	0.116427	-0.00111445	2.59918	1.50094	-0.000740484	0.0291413	0.190141	2.15371	0.0848536	3.26793e-06
1932.23	-0.523248	0.000371504	2.14689	1.16979	0.000604803	-0.0363908	0.517837	1.5282	0.690061	-7.329e-06
1943.68	-0.641593	0.0002427	2.45122	0.65509	-0.000354814	0.0373605	0.66033	1.11288	0.531218	8.41022e-06
1955.13	-0.634929	-0.000617073	1.65723	0.417973	8.03758e-05	-0.0269881	0.560569	0.943697	0.285338	-7.13132e-06
1966.58	-0.466363	0.000731471	1.67353	0.509752	0.000147014	-0.0140978	0.492499	-0.0406776	0.53904	4.4963e-06
1978.02	-0.0181494	-0.000634814	0.9668	-0.0188909	-0.000284445	0.447267	0.251058	-0.0589385	0.067983	-1.54519e-06
1989.47	0.0631446	0.000412824	0.570315	-0.407758	0.000318483	0.180175	0.386696	0.177139	0.00614263	-9.11859e-07
2000.92	-0.0563341	-0.000156283	2.66342	-0.579828	-0.000259894	-0.0946582	0.288039	-0.790788	-0.0221154	2.42267e-06
2012.36	-0.00134523	-6.25527e-05	0.791194	-1.15651	0.000135781	0.0574712	0.478771	-0.647979	0.00820655	-2.89878e-06
2023.81	0.444298	0.00020203	-0.487457	-1.3488	1.80948e-05	-0.0321447	0.668347	-0.640534	0.0378343	2.53182e-06
2035.26	0.15981	-0.00025212	0.2906	-1.34247	-0.000163524	0.0130144	0.511441	-1.44112	-0.457889	-1.65618e-06
2046.7	-0.00872722	0.00022739	-0.141481	-1.36663	0.000264698	0.000235032	0.65037	-1.08548	-0.174302	6.36065e-07
2058.15	-0.0953439	-0.000156038	-0.00294378	-1.20862	-0.000292668	-0.010744	0.591568	-0.899672	0.0569831	2.38416e-07
2069.6	-0.471197	6.88617e-05	-0.746209	-0.730331	0.00023032	0.0144642	0.527267	-0.583905	-0.00297672	-7.96904e-07
2081.04	-0.0262206	9.06514e-06	-0.77778	-0.504965	-7.79696e-05	-0.0163868	0.592946	-0.351636	-0.0351852	9.94737e-07
2092.49	0.0507896	-6.27298e-05	-0.504401	-0.0713063	-0.000141563	0.0163217	0.633244	-0.312021	0.0623985	-8.94036e-07
2103.94	-0.0409278	8.76237e-05	-0.6187	0.913734	0.0003808	-0.013758	0.534733	0.106131	0.467166	6.0523e-07
2115.38	0.0128953	-8.73498e-05	-0.453984	1.09028	-0.000571282	0.00895466	0.380421	-0.0487607	0.0874128	-2.55578e-07
2126.83	0.0250893	6.98601e-05	-0.224074	1.05736	0.000635333	-0.00260547	0.575596	0.0361951	-0.0824435	-5.19584e-08
2138.28	-0.0703666	-4.37812e-05	0.138556	1.29784	-0.000506095	-0.0043486	0.348626	-0.0379813	0.0688767	2.58353e-07
2149.73	0.166835	1.58793e-05	-0.124494	1.11023	0.000153115	0.010963	0.146973	0.159923	-0.0501805	-3.40182e-07
2161.17	0.518666	9.89345e-06	0.223391	1.10423	0.000392726	-0.0173112	0.426379	0.756793	0.0286499	3.13591e-07
2172.62	-0.358367	-3.19161e-05	0.306297	1.44486	-0.00102383	0.0249198	0.0789426	0.233124	-0.00908837	-2.2328e-07
2184.07	-0.373921	4.94759e-05	0.117881	1.62593	0.00155964	-0.0273604	-0.0749286	-0.0344607	-0.00816573	1.04589e-07
2195.51	0.15414	-6.12538e-05	-0.0489195	1.73134	-0.00177695	0.0263523	0.0558064	-0.00293509	0.0161063	8.16222e-09
2206.96	-0.0951933	6.44762e-05	-0.556221	1.64854	0.00146876	-0.0170535	-0.0400326	0.0304644	-0.0179786	-8.34418e-08
2218.41	0.0502474	-5.52098e-05	0.0801341	1.67149	-0.000524775	-0.00611883	0.0204747	-0.079521	0.014568	1.16839e-07
2229.85	-0.0277291	2.99272e-05	-0.175307	1.82322	-0.000987702	0.0645356	-0.00727895	-0.515411	-0.00708627	-1.12839e-07
2241.3	-0.0109469	1.2089e-05	-0.407929	1.54294	0.00277492	-0.39908	-0.00448841	0.0174165	-0.00191384	8.14276e-08
2252.75	0.0270611	-6.62988e-05	0.0586904	1.35452	-0.0043352	-0.26793	0.00986435	0.0334287	0.0093588	-3.98497e-08
2264.19	-0.0926837	0.00012148	0.170195	1.25492	0.00505273	0.10062	-0.0120837	-0.0838545	-0.0126513	1.50953e-09
2275.64	0.483213	-0.000160402	0.619493	0.820444	-0.0043599	-0.0466744	0.0116095	0.17051	0.0104512	2.69599e-08
2287.09	0.895651	0.000163218	0.518409	0.561728	0.00200401	0.0161793	-0.00871622	-0.500548	-0.00301837	-4.15458e-08
2298.53	1.54725	-0.000113407	1.2849	0.273531	0.00190401	0.0030537	0.00454617	0.000729299	-0.00767084	3.94972e-08
2309.98	2.1665	5.21745e-06	1.52822	-0.0129863	-0.00691628	-0.0134909	-0.000456208	0.473857	0.0183924	-2.93763e-08
2321.43	2.03542	0.000149483	1.14868	-0.177195	0.0124639	0.0190059	-0.00252965	-0.114244	-0.0256529	1.47323e-08
2332.88	2.84152	-0.00031766	1.3653	-0.621477	-0.0167515	-0.0167105	0.00403051	0.0291284	0.0270421	-4.06902e-10
2344.32	3.44889	0.000447496	0.885261	-1.03198	0.0140901	0.0128949	-0.00419991	0.0113535	-0.0207311	-6.92009e-09
2355.77	3.37126	-0.000478373	1.19178	-0.991605	-0.00953194	-0.00787111	0.00350016	-0.0313214	0.0018004	1.33438e-08
2367.22	4.14118	0.00035818	1.02393	-0.801578	-0.00558289	0.00226826	-0.00243736	0.0393201	0.0247638	-1.42966e-08
2378.66	4.31282	-6.49524e-05	0.407686	-1.05348	0.0269249	0.00253496	0.0013658	-0.0363298	-0.0603501	1.09891e-08
2390.11	4.56822	-0.000372917	0.164941	-1.13135	-0.0665314	-0.00546281	-0.000431562	0.0261039	0.0940838	-5.94301e-09
2401.56	4.96146	0.000865416	-0.0913514	-0.750054	0.138776	0.00621166	-0.000364718	-0.0150142	-0.133146	1.5541e-09
2413	4.80996	-0.00126618	0.0794155	-0.807199	0.395792	-0.005199	0.00106262	0.0030583	0.179408	3.1106e-09
2424.45	5.67431	0.0013992	-0.415782	-0.658523	0.423833	0.00318613	-0.00159927	0.00738345	0.439141	-5.34533e-09
2435.9	5.65327	-0.00110648	-0.265349	-0.218028	0.18327	-0.000975992	0.00192977	-0.013504	-0.0212256	4.34051e-09
2447.34	5.65826	0.000309471	0.0966462	-0.0304564	0.22085	-0.000818109	-0.00238238	0.014071	0.320377	-4.26735e-09
2458.79	6.13482	0.000930606	0.00843246	0.752559	0.529796	0.00187709	0.0040617	-0.00975031	0.481296	1.94235e-09
2470.24	5.62707	-0.00237321	0.594066	1.16874	0.366523	-0.00216289	-0.0072536	0.00252586	0.528908	-1.80034e-10
2481.68	6.18218	0.00360166	0.682867	1.08006	0.559124	0.00183792	0.00600172	0.00505343	0.294773	-1.53042e-09
2493.13	6.4116	-0.00409037	0.680804	1.04555	0.498597	-0.00116311	-0.00216756	-0.0104923	0.124	1.34275e-09
2504.58	6.52822	0.00334819	0.900381	0.728917	0.339336	0.000405667	-0.00903788	0.0119031	0.36824	-1.84994e-10
2516.03	6.83598	-0.00112396	0.598132	0.661725	0.633984	0.000226573	0.0267428	-0.00845289	0.264724	5.74236e-10
2527.47	6.43294	-0.00239113	0.648326	0.587201	0.0790011	-0.000617366	-0.0624358	0.000656749	0.569045	-9.10143e-10
2538.92	6.50699	0.0064572	0.895113	0.485576	0.140371	0.000743081	0.150359	0.0094921	0.416122	3.43348e-09
2550.37	5.48206	-0.00981744	0.965476	0.14	0.452284	-0.000651266	0.462815	-0.0188969	0.488931	-1.19712e-09
2561.81	5.48419	0.0111254	1.02945	-0.0420736	-0.00930841	0.000428288	-0.00784282	0.0245015	0.774513	-2.55321e-09
2573.26	6.40965	-0.00956696	0.455968	-0.0381567	-0.0332563	-0.000166977	-0.0894543	-0.0248021	0.453107	2.24156e-09
2584.71	5.77926	0.00525992	0.257609	-0.539405	0.022637	-5.78416e-05	0.536034	0.0193815	0.379731	-9.06796e-10
2596.15	5.92175	0.00195534	0.421054	-0.683024	0.0319847	0.000202259	0.0810379	-0.00287367	0.461725	-4.32398e-10
2607.6	5.52926	-0.0149421	0.0127781	-0.716678	-0.348079	-0.00025488	0.0385869	-0.0233694	0.44731	-9.01078e-10
2619.05	4.6061	0.0273709	-0.0447539	-0.671035	-0.315693	0.000230016	0.693148	0.0558062	0.19913	9.51872e-10
2630.49	4.08384	-0.0403791	0.0380432	-0.652663	0.113421	-0.000156618	0.266996	-0.0955224	0.2951	2.5216e-09
2641.94	2.62629	0.0500012	-0.0403007	-0.890634	-0.0468139	6.69092e-05	0.570795	0.143932	0.292083	-2.38134e-09
2653.39	2.23077	-0.0526681	0.0137348	-0.525598	0.00784409	1.24341e-05	0.996367	-0.233745	-0.0602246	-9.87208e-10
2664.84	2.42928	0.0363026	0.00204613	-0.385462	0.0163717	-6.51551e-05	0.685453	-0.408544	-0.349968	1.89378e-09
2676.28	2.71463	0.466992	-0.0528539	-0.339071	-0.0277437	8.63165e-05	0.794066	0.477428	-0.274436	-1.17759e-09
2687.73	2.96958	0.11278	0.176424	-0.0526745	0.0306011	-8.01844e-05	0.868005	0.144152	0.078289	-8.81309e-10
2699.18	1.61804	-0.0764367	0.693529	0.0831664	-0.0235936	5.64691e-05	1.07644	-0.118062	-0.0143453	2.07141e-09
2710.62	2.15609	0.0536024	0.996864	0.335528	0.0148004	-2.63253e-05	1.04099	0.0929979	-0.0176133	-8.89348e-10
2722.07	3.40351	-0.0352928	1.27708	0.349695	-0.00572591	-8.29983e-07	0.959216	-0.064917	0.0286353	-1.7293e-09
2733.52	3.11065	0.0205584	1.52914	0.340475	-0.00225715	1.91747e-05	1.18838	0.0376914	-0.0287949	3.88166e-10
2744.96	3.42137	-0.0106397	1.30012	0.077198	0.00763662	-2.69123e-05	1.1302	-0.0121336	0.0240549	7.95905e-10
2756.41	3.60669	0.00232056	1.27734	-0.0766802	-0.00971475	2.55641e-05	0.990347	-0.00707313	-0.0131707	-3.53651e-10
2767.86	3.56446	0.000561137	1.22766	0.0561901	0.00882133	-1.86144e-05	0.956438	0.0168197	0.00397559	-1.3357e-09
2779.3	3.0738	-0.00307948	0.94188	-0.0331266	-0.00601483	1.00103e-05	0.952874	-0.0213584	0.00270204	2.9398e-09
2790.75	3.21877	0.00558137	1.41163	0.00998227	0.00254049	-2.90704e-06	0.714809	0.0206427	-0.00681155	8.38104e-10
2802.2	3.46264	-0.00862119	1.31207	0.00374049	0.000541261	-1.07385e-06	0.73972	-0.0153119	0.00829866	-2.68098e-09
2813.64	3.16914	0.016446	0.962184	-0.0144141	-0.00258028	2.00659e-06	0.816916	0.00758407	-0.00754288	1.30632e-09
2825.09	4.20191	-0.0244121	1.30074	0.0168075	0.00338374	-1.29232e-06	0.719804	-6.93809e-05	0.0053889	-1.57018e-09
2836.54	4.24417	0.0349462	1.05938	-0.0146992	-0.00312359	9.23936e-07	1.06283	-0.0053318	-0.00284809	9.0381e-10
2847.99	3.74315	-0.0445926	1.22116	0.0102016	0.00218043	-2.63001e-06	0.955985	0.00784333	0.000687747	2.2465e-09
2859.43	3.32122	0.049537	1.45395	-0.00473125	-0.000986518	7.09626e-06	0.77579	-0.00767052	0.000733815	-3.38959e-09
2870.88	3.21389	-0.0368349	1.39397	-0.000317452	-9.41289e-05	-1.3507e-05	1.04079	0.00565483	-0.00147191	1.18969e-09
2882.33	4.39866	-0.462663	1.54759	0.00389572	0.000832899	1.95503e-05	1.09871	-0.00285055	0.00185531	1.34036e-09
2893.77	4.3203	-0.119684	1.31823	-0.00551204	-0.00115151	-2.19502e-05	0.934685	0.000183521	-0.00226309	-9.84638e-10
2905.22	4.08364	0.083539	1.15694	0.0053198	0.00109652	1.74873e-05	1.0512	0.00173798	0.00290502	3.82537e-10
2916.67	4.38715	-0.0578941	0.947486	-0.00388164	-0.000791385	-4.29099e-06	1.22997	-0.00267026	-0.00367932	-6.29821e-10
2928.11	4.35286	0.0339645	0.753263	0.00191256	0.000383897	-1.69183e-05	0.703317	0.00268034	0.0041616	1.20122e-09
2939.56	4.41577	-0.0120042	0.654077	-5.42309e-05	-3.22221e-06	4.20579e-05	0.763678	-0.0020366	-0.00375042	-8.3925e-10
2951.01	4.22012	-0.00463152	0.786192	-0.00126874	-0.000266028	-6.38051e-05	0.89378	0.0010852	0.001936	-2.01157e-09
2962.45	4.35758	0.0165153	0.651286	0.00189099	0.000391254	7.28884e-05	0.512514	-0.000144698	0.00140016	3.09709e-09
2973.9	4.51417	-0.0176532	0.4634	-0.00186877	-0.000384469	-6.05721e-05	0.496175	-0.000561685	-0.00569738	-5.4446e-11
2985.35	4.19412	0.012517	0.957609	0.00139868	0.000286236	2.19543e-05	0.534779	0.000931185	0.00981913	-3.53264e-09
2996.79	3.87214	-0.0027204	1.22582	-0.000727577	-0.000147398	4.07273e-05	0.447724	-0.00097035	-0.0125981	1.00436e-09
3008.24	3.89916	-0.0104731	1.11509	7.78495e-05	1.36749e-05	-0.000115896	0.0346228	0.000761214	0.0136383	2.60407e-09
3019.69	4.03195	0.0256507	0.839952	0.000399097	8.39467e-05	0.000182766	0.301467	-0.000419946	-0.0124407	-1.14211e-09
3031.14	3.92459	-0.0333573	1.36092	-0.000638449	-0.000132384	-0.000214699	0.333686	6.03595e-05	0.00362807	-2.36634e-09
3042.58	4.10806	0.0331846	1.69643	0.00065213	0.000134364	0.000185963	-0.0989768	0.000230406	0.00887568	2.86766e-09
3054.03	4.00031	-0.01963	0.834718	-0.00050333	-0.000103107	-8.10248e-05	0.0278442	-0.000402243	-0.0281762	1.67261e-09
3065.48	3.47672	-0.0117717	0.605287	0.000276082	5.60093e-05	-9.58274e-05	-0.00314836	0.000440988	0.0544821	-3.09243e-09
3076.92	3.61227	0.0798382	1.15352	-4.87279e-05	-9.18434e-06	0.000313686	0.00701158	-0.000360599	-0.0933148	9.62916e-11
3088.37	3.59756	-0.397752	0.324424	-0.000123444	-2.60687e-05	-0.000514566	-0.0357827	0.000193416	0.180946	1.42397e-09
3099.82	3.1603	-0.266866	0.193713	0.00021486	4.45912e-05	0.000622112	0.0812392	1.81181e-05	0.444216	-6.23081e-10
3111.26	3.41221	0.0768794	0.820327	-0.000227102	-4.68151e-05	-0.000560284	-0.143307	-0.000227161	-0.00905799	6.08882e-10
3122.71	3.59068	-0.0257318	-0.165019	0.000180539	3.70069e-05	0.000279664	-0.371836	0.000386509	-0.0331323	2.0321e-10
3134.16	3.35204	0.0111524	0.549564	-0.000103827	-2.10964e-05	0.000214523	-0.228376	-0.000453006	0.0431126	-1.2186e-09
3145.6	3.35624	-0.0232448	-0.0593483	2.44967e-05	4.75027e-06	-0.000841558	-0.380482	0.000394248	-0.0398451	3.74331e-10
3157.05	3.16821	0.0757438	-0.273187	3.73958e-05	7.93242e-06	0.00144151	-0.0583859	-0.00019807	0.0284386	-6.46666e-10
3168.5	3.35181	-0.309419	1.46914	-7.1949e-05	-1.49505e-05	-0.00179678	0.0619545	-0.000116874	-0.014229	7.21697e-10
3179.94	3.13476	-0.363998	0.473652	7.88295e-05	1.62636e-05	0.0016819	-0.0327807	0.000493371	-0.00256593	6.78291e-10
3191.39	2.38206	0.0981567	0.45582	-6.4525e-05	-1.32338e-05	-0.000936939	-0.00192131	-0.000835889	0.0138242	-2.77625e-09
3202.84	2.79699	-0.0313721	0.535031	3.87562e-05	7.88482e-06	-0.0004491	0.0257973	0.00102346	-0.0209737	2.04578e-09
3214.29	2.82517	-0.00250855	0.712267	-1.11671e-05	-2.19614e-06	0.00226686	-0.0264854	-0.00093715	0.0234661	-2.86549e-10
3225.73	2.19374	0.0208079	1.76052	-1.1002e-05	-2.35158e-06	-0.00405898	0.00455377	0.000499333	-0.0152536	-2.11706e-09
3237.18	1.98729	-0.0274752	1.63619	2.39635e-05	4.98582e-06	0.00517404	0.0501335	0.000283393	0.000507553	2.98486e-09
3248.63	2.12518	0.0273708	2.18063	-2.72801e-05	-5.63008e-06	-0.00493074	-0.142994	-0.00128678	0.0228263	1.16854e-12
3260.07	2.23079	-0.0194473	2.23346	2.29879e-05	4.71503e-06	0.00287007	0.392348	0.00226039	-0.0541217	-1.23738e-09
3271.52	2.06285	0.0115768	2.42996	-1.43728e-05	-2.92616e-06	0.000982654	0.255409	-0.00285779	0.099489	-1.99474e-10
3282.97	2.13191	-0.0043085	3.56658	4.80445e-06	9.56475e-07	-0.0058758	0.00576342	0.00271373	-0.206139	1.84328e-09
3294.41	2.23675	-0.00146125	4.02902	3.10993e-06	6.68809e-07	0.0104799	-0.196499	-0.00156522	-0.433069	-9.03545e-10
3305.86	2.24691	0.00470964	4.44341	-7.93387e-06	-1.65444e-06	-0.0134727	-0.286035	-0.00060568	0.0246681	-2.95394e-10
3317.31	2.3545	-0.00539126	4.30385	9.40799e-06	1.94438e-06	0.0143723	0.346274	0.00345591	0.0211362	2.41655e-09
3328.75	2.24416	0.0044836	3.77927	-8.16172e-06	-1.67597e-06	-0.0126854	-0.369177	-0.006256	-0.0336928	-4.30127e-09
3340.2	2.25703	-0.0034208	3.44235	5.29762e-06	1.07808e-06	0.00314064	0.747122	0.00799988	0.0339719	2.20347e-10
3351.65	2.23212	0.0033248	2.61796	-1.99062e-06	-3.96098e-07	0.0101405	1.13361	-0.00770613	-0.0275866	2.843e-09
3363.1	1.94017	-0.00453247	1.74835	-8.24847e-07	-1.79015e-07	-0.0300046	-0.446716	0.0048422	0.0193849	-2.13332e-09
3374.54	2.16352	0.00640206	0.828454	2.60874e-06	5.42694e-07	0.0563936	0.221835	0.00040493	-0.00819413	1.02382e-10
3385.99	2.21557	-0.00769343	-0.265393	-3.23094e-06	-6.68485e-07	-0.0946302	-0.108609	-0.00745804	0.000756007	1.41054e-09
3397.44	2.33949	0.00730091	-1.23191	2.88733e-06	5.9378e-07	0.180939	-0.535194	0.0160475	0.00472943	-2.29108e-10
3408.88	2.81309	-0.00486073	-1.4548	-1.94366e-06	-3.95482e-07	0.446089	0.042211	-0.0236441	-0.00819899	-1.3142e-09
3420.33	2.86482	-0.000299434	-1.00065	8.0442e-07	1.61338e-07	-0.0128992	-0.0496569	0.0274041	0.00907815	1.24159e-09
3431.78	3.01198	0.0117919	-0.842122	1.94096e-07	4.33671e-08	-0.0278872	0.553353	-0.0251135	-0.00757162	-3.2552e-10
3443.22	3.00402	-0.0238559	-0.926433	-8.49742e-07	-1.78968e-07	0.037759	0.766815	0.0125089	0.00458356	1.4484e-12
3454.67	3.18221	0.0379873	-0.879343	1.10628e-06	2.28797e-07	-0.0362257	0.396391	0.0212716	-0.0012389	1.39582e-09
3466.12	3.38266	-0.050712	-0.699316	-1.0213e-06	-2.07755e-07	0.0284832	0.546257	-0.164453	-0.00157551	-1.7234e-09
3477.56	3.06424	0.0592777	-0.46226	7.11553e-07	1.4353e-07	-0.0192181	0.313407	0.0921517	0.00335168	-6.53771e-11
3489.01	2.87697	-0.0553961	-0.103068	-3.18425e-07	-6.4195e-08	0.00736358	0.408476	0.0796166	-0.00396503	-1.88495e-10
3500.46	2.60291	-0.467525	0.0863832	-3.67296e-08	-7.40817e-09	0.000314213	0.781499	-0.0510193	0.00356716	1.3297e-09
3511.9	2.56029	-0.0956141	-0.0507963	2.75902e-07	5.81548e-08	-0.00577891	0.449127	0.0379124	-0.00244531	-7.97573e-10
3523.35	2.51939	0.0744681	0.0195601	-3.77595e-07	-7.65207e-08	0.00896189	0.461983	-0.033509	0.000916222	-1.53676e-09
3534.8	2.50485	-0.0561275	0.0320822	3.58214e-07	7.1851e-08	-0.00937829	0.315615	0.0356359	0.000724455	2.33368e-09
3546.25	2.79437	0.0381624	-0.0792822	-2.59112e-07	-5.45985e-08	0.00740648	-0.0954033	-0.0381158	-0.00220758	-1.0938e-09
3557.69	2.59499	-0.021093	0.144695	1.25794e-07	2.62613e-08	-0.00411657	0.0270979	0.0356872	0.00327586	8.16722e-10
3569.14	2.51679	0.00740759	-0.264411	9.44216e-10	1.63661e-10	0.000729038	0.0166676	-0.0234734	-0.00367715	3.92923e-10
3580.59	2.53805	0.00469899	-0.367538	-8.83761e-08	-1.85225e-08	0.00186465	-0.0607998	-0.0073866	0.00318928	-1.03238e-09
3592.03	2.35175	-0.00982181	-0.0351953	1.28499e-07	2.77481e-08	-0.00323561	0.100154	0.0757872	-0.00168964	1.81963e-09
3603.48	2.30083	0.0119353	-0.444095	-1.26732e-07	-2.59647e-08	0.00340054	-0.175336	-0.320091	-0.000738525	-1.86412e-09
3614.93	2.10399	-0.0114389	-0.129457	9.6132e-08	1.97674e-08	-0.00268078	-0.437031	0.125053	0.00370236	-5.5104e-10
3626.37	2.03039	0.00852094	0.10691	-5.00716e-08	-1.04318e-08	0.00152034	-0.0200876	0.199461	-0.00647072	1.07381e-09
3637.82	2.11055	-0.00426912	-0.0813038	3.75069e-09	-1.0022e-09	-0.000335007	0.05264	-0.142007	0.00808137	-1.93097e-09
3649.27	2.2148	8.44867e-05	0.0550755	3.1405e-08	7.167e-09	-0.000580012	-0.0554729	0.0296825	-0.00758198	1.18279e-09
3660.71	2.27365	0.00294705	-0.027378	-4.56464e-08	-8.43589e-09	0.00108346	0.0475436	-0.0229625	0.00450735	1.44011e-10
3672.16	2.40238	-0.00437551	0.00714509	4.2407e-08	8.03505e-09	-0.00117534	-0.0359599	0.0730894	0.000778586	-1.00634e-09
3683.61	2.52593	0.00429917	0.00952311	-3.30336e-08	-7.3289e-09	0.000954925	0.018265	-0.121733	-0.00724475	2.77736e-09
3695.05	2.33921	-0.00318098	-0.0173772	1.8728e-08	3.45174e-09	-0.000567682	0.00228578	0.0580755	0.0144387	-1.05143e-09
3706.5	2.52586	0.00161264	0.0199353	-3.14412e-09	1.11937e-09	0.00015669	-0.0212206	0.0620501	-0.0229817	-3.89027e-10
3717.95	2.59258	-0.000117057	-0.0178297	-8.98869e-09	-1.86726e-09	0.000171275	0.0354162	-0.167868	0.025817	5.66541e-10
3729.4	2.50257	-0.000961938	0.0121182	1.42765e-08	1.50454e-09	-0.000360984	-0.0749915	0.191094	-0.0243603	-2.17209e-09
3740.84	2.67127	0.00148686	-0.00494064	-1.50603e-08	-2.66825e-09	0.000407052	0.390561	-0.0194232	0.0136132	1.90438e-09
3752.29	2.60147	-0.00149548	-0.00150867	1.21924e-08	2.1462e-09	-0.000340608	0.461194	-0.0238804	0.0117908	-2.86765e-10
3763.74	2.85958	0.00113874	0.00574254	-6.49598e-09	-4.26114e-11	0.000210963	-0.127864	0.0409067	-0.0724429	-5.86456e-10
3775.18	3.06767	-0.000610981	-0.007303	2.48047e-09	-1.16698e-09	-6.82607e-05	0.170053	-0.0473373	0.382757	9.17045e-10
3786.63	2.9746	9.0519e-05	0.00656017	1.24525e-09	-1.03592e-09	-4.89585e-05	0.829353	0.0578462	0.289136	-1.4681e-09
3798.08	3.49888	0.00029855	-0.00437254	-4.66484e-09	2.207e-09	0.000119717	1.42233	-0.120022	-0.0989015	1.359e-09
3809.52	3.67324	-0.000500465	0.00171726	6.08218e-09	-5.29562e-10	-0.000140517	1.40424	0.025313	0.0418527	1.36272e-09
3820.97	3.35474	0.000521282	0.000593949	-7.29195e-09	-1.34795e-09	0.000121033	1.19634	0.0794086	-0.011148	-1.09514e-09
3832.42	3.51668	-0.000409278	-0.00206389	4.60612e-09	2.63792e-09	-7.7878e-05	1.47836	-0.132902	-0.00716656	4.72969e-10
3843.86	3.30034	0.000230812	0.00253829	1.20927e-09	-8.10655e-10	2.85186e-05	1.42219	-0.00686165	0.0162417	-3.00438e-11
3855.31	3.15846	-4.88526e-05	-0.00214976	-4.36743e-09	-1.65862e-10	1.32168e-05	1.34827	0.110588	-0.0202749	-1.39917e-09
3866.76	3.2928	-9.13378e-05	0.00121643	2.74044e-09	-4.25397e-10	-3.94333e-05	1.31531	0.0216312	0.01673	1.22037e-09
3878.21	2.98525	0.000167994	-0.000128197	-7.76576e-10	9.8391e-10	4.83398e-05	1.40011	-0.0159395	-0.012129	-4.809e-10
3889.65	3.34732	-0.000181219	-0.00075509	1.85022e-09	-3.20931e-10	-4.28728e-05	1.28721	0.00723291	0.00668914	-8.7841e-10
3901.1	3.56541	0.0001465	0.00117879	-1.52811e-09	-2.3749e-09	2.85933e-05	0.896429	-0.00276003	-0.0010257	1.09078e-09
3912.55	3.19031	-8.64146e-05	-0.00103704	-3.78278e-10	2.60619e-09	-1.15774e-05	0.979418	0.00268227	-0.00353512	3.78017e-10
3923.99	3.46772	2.30408e-05	0.000386013	3.3524e-09	-1.13756e-09	-3.23178e-06	0.835886	-0.00527445	0.00604342	-6.15945e-10
3935.44	3.60501	2.72473e-05	0.00056899	-3.14738e-09	-6.27736e-11	1.28931e-05	0.6959	0.00916212	-0.0063463	-6.09918e-10
3946.89	3.54557	-5.60826e-05	-0.00150962	-3.80742e-10	2.936e-09	-1.65722e-05	0.965422	-0.0121147	0.00498153	-5.65189e-10
3958.33	3.24643	6.27887e-05	0.0020668	2.84233e-09	-1.84997e-09	1.51382e-05	0.755573	0.0106289	-0.00277226	2.73136e-10
3969.78	2.55639	-5.22593e-05	-0.00191532	-1.44241e-09	-1.78369e-09	-1.04493e-05	0.704606	-0.00376516	0.000525523	3.94704e-09
3981.23	2.6584	3.21322e-05	0.000896687	-1.01451e-09	1.10949e-10	4.60227e-06	1.11819	-0.00997383	0.00118331	-3.45032e-09
3992.67	3.01329	-1.01322e-05	0.000870384	1.01e-09	1.18073e-09	6.40061e-07	1.06443	0.0364236	-0.00209243	-2.46578e-09
4004.12	2.84681	-7.84436e-06	-0.00294994	-1.34323e-09	-2.66416e-10	-4.18029e-06	0.722366	-0.119756	0.00221977	5.15969e-09
4015.57	2.76313	1.86172e-05	0.00462522	1.08793e-09	-7.62794e-10	5.66109e-06	0.620765	0.0392129	-0.00176903	-3.01889e-09
4027.01	2.89863	-2.16876e-05	-0.00524327	-1.29419e-10	1.42442e-10	-5.32844e-06	0.6914	0.0849097	0.00102227	-7.35717e-10
4038.46	2.85704	1.85814e-05	0.00466136	-2.4057e-09	1.91036e-10	3.79975e-06	0.630754	-0.0575697	-0.000248626	3.0203e-09
4049.91	2.69802	-1.18754e-05	-0.00339925	3.83241e-09	1.60214e-09	-1.79983e-06	0.337574	0.0543341	-0.000356071	-1.67198e-09
4061.36	2.73051	4.26139e-06	0.00115944	-1.54346e-09	-4.12821e-10	-4.88189e-08	0.0241652	-0.0616985	0.000694683	3.5415e-10
4072.8	2.67823	2.14443e-06	0.00581444	-1.02459e-09	-1.04589e-09	1.34177e-06	-0.04018	0.0734797	-0.000763267	-4.71561e-10
4084.25	2.50864	-6.14155e-06	-0.0128826	2.47574e-09	1.99418e-09	-1.92675e-06	0.0276102	-0.079123	0.0006249	-1.15024e-09
4095.7	2.29507	7.46701e-06	0.023393	-2.53493e-09	-7.6755e-10	1.86975e-06	-0.0178323	-0.208912	-0.000374892	-3.88566e-10
4107.14	2.44999	-6.58376e-06	-0.0354663	3.39392e-09	-1.88465e-09	-1.37783e-06	-0.00407709	0.239483	0.000108169	1.0681e-10
4118.59	2.88907	4.3623e-06	0.0466542	8.31698e-12	1.53382e-09	6.93778e-07	0.0152566	0.0364793	0.000103919	1.84429e-09
4130.04	3.00834	-1.73992e-06	-0.043988	-3.10419e-09	7.59344e-10	-4.35362e-08	-0.0355488	-0.0568534	-0.000224445	3.15958e-10
4141.48	3.29761	-5.36392e-07	-0.443793	1.32425e-09	-1.73076e-10	-4.23961e-07	0.0440263	0.0534102	0.000250314	8.9733e-12
4152.93	3.56332	2.01362e-06	-0.148708	-4.45009e-10	-7.85081e-10	6.52511e-07	-0.0561818	-0.0417492	-0.000203615	-6.0837e-10
4164.38	3.59378	-2.56046e-06	0.120028	-1.95312e-10	-9.52766e-11	-6.5548e-07	0.0456521	0.0273159	0.000119173	2.23557e-10
4175.82	3.89195	2.32455e-06	-0.101501	-3.4884e-10	1.91842e-09	4.98681e-07	0.455644	-0.0123806	-3.22817e-05	-7.34914e-10
4187.27	4.00447	-1.59473e-06	0.0704266	-2.05776e-10	2.03609e-10	-2.6506e-07	0.50771	0.000199828	-3.06084e-05	-1.83836e-09
4198.72	3.85484	6.91346e-07	-0.0250215	2.51534e-10	-6.7991e-10	3.64279e-08	0.506646	0.00712104	5.69008e-05	2.76363e-09
4210.16	4.05793	1.1099e-07	-0.0286986	6.43754e-10	-7.08736e-10	1.34155e-07	0.649215	-0.0109585	-4.84324e-05	1.07161e-09
4221.61	4.32912	-6.50462e-07	0.103686	2.12504e-10	-1.29083e-09	-2.2202e-07	1.03279	0.0114354	1.84143e-05	-1.6457e-09
4233.06	4.51776	8.75661e-07	-0.220635	2.24781e-12	-4.6462e-10	2.28391e-07	1.18756	-0.00915292	1.39907e-05	-4.70516e-10
4244.51	4.61557	-8.19288e-07	0.810232	1.24269e-09	1.74903e-10	-1.7779e-07	1.23189	0.00553834	-3.00508e-05	8.14223e-10
4255.95	4.76611	5.80912e-07	0.567864	-1.0229e-09	4.14636e-10	9.97674e-08	1.51067	-0.00217004	1.74563e-05	-3.18e-10
4267.4	5.1274	-2.714e-07	-1.06853	-9.77899e-10	4.16036e-10	-2.02674e-08	1.70241	9.10356e-05	2.53102e-05	-3.99373e-10
4278.85	5.22485	-1.31585e-08	-0.255223	1.63728e-10	1.03395e-09	-4.13896e-08	1.95692	0.00048964	-8.72222e-05	1.74473e-09
4290.29	5.3939	2.09922e-07	0.166546	-9.9361e-10	2.69329e-10	7.58801e-08	1.64305	-0.000107542	0.000146238	-1.50754e-09
4301.74	5.5437	-2.98003e-07	-0.127755	1.7762e-10	-6.20168e-10	-8.05872e-08	1.59024	-0.000271008	-0.000174355	3.23782e-10
4313.19	5.53647	2.8504e-07	0.091855	7.33235e-10	-7.93844e-10	6.21923e-08	1.56854	-0.000318222	0.000145673	4.62669e-10
4324.63	5.79531	-2.08511e-07	-0.0592653	1.84733e-09	-1.1638e-09	-3.59255e-08	0.884323	0.00241561	-4.60625e-05	-1.66023e-09
4336.08	5.69861	1.06179e-07	0.0256466	-2.34794e-10	1.21317e-09	9.05136e-09	0.829914	-0.00585391	-0.000117868	1.3755e-09
4347.53	5.78648	-7.393e-09	0.00213183	-2.46247e-09	-3.4704e-10	1.19048e-08	0.70171	0.00965386	0.000313493	-1.27332e-09
4358.97	6.10812	-6.39085e-08	-0.0158183	1.51859e-10	-1.89634e-09	-2.39411e-08	0.4335	-0.0121144	-0.000483593	7.04541e-10
4370.42	6.15391	9.94578e-08	0.0246585	9.32458e-11	1.91783e-09	2.79872e-08	0.0905918	0.0110987	0.000556543	8.5193e-10
4381.87	6.35218	-1.04473e-07	-0.0273568	5.75238e-10	9.59785e-10	-2.34064e-08	-0.0993235	-0.00491004	-0.000465333	-7.46516e-10
4393.31	6.12056	7.90846e-08	0.0230679	3.68844e-10	-1.02953e-09	1.46774e-08	0.427887	-0.00553384	0.000172588	2.09438e-09
4404.76	6.0551	-3.90286e-08	-0.0140346	1.39356e-09	5.0419e-10	-3.28694e-09	0.542545	0.0184629	0.000304429	-1.42265e-09
4416.21	6.50047	4.29586e-09	0.00385852	6.59243e-11	2.84355e-10	-4.76698e-09	0.573929	-0.0302269	-0.000877331	-4.96027e-10
4427.66	6.63748	2.17791e-08	0.00441599	-2.99942e-09	5.97901e-11	8.6211e-09	0.603043	0.0361307	0.00138776	6.3927e-10
4439.1	6.53932	-3.35655e-08	-0.00918984	1.01831e-09	-7.01866e-10	-9.24503e-09	0.426551	-0.0265294	-0.00163302	-2.07091e-09
4450.55	6.7929	3.53069e-08	0.010261	8.62111e-10	-2.6995e-10	7.42717e-09	0.72796	-0.0191968	0.00141737	7.15031e-10
4462	6.73623	-2.78131e-08	-0.00846817	-6.55448e-10	1.2221e-09	-5.77681e-09	0.876446	-0.0659505	-0.000622216	3.0371e-09
4473.44	6.75602	1.44231e-08	0.00512941	4.70465e-11	-3.75451e-10	1.65816e-09	0.795061	0.0203509	-0.000721164	-1.38296e-09
4484.89	7.05421	-3.10951e-09	-0.00153631	-1.07486e-09	1.05339e-10	1.74672e-09	1.12695	0.105395	0.00237968	-1.88209e-09
4496.34	6.88253	-5.55124e-09	-0.00135921	-5.36273e-10	-7.75381e-10	-2.95347e-09	1.35152	-0.289228	-0.00391365	3.29972e-09
4507.78	7.64824	1.12921e-08	0.00306502	1.8989e-09	-1.67337e-10	3.57642e-09	1.22937	0.174569	0.00474004	-1.54218e-09
4519.23	6.4103	-1.45124e-08	-0.0035228	1.19324e-09	1.29266e-09	-2.88352e-09	1.59241	0.12496	-0.00427199	-2.25825e-09
4530.68	5.36373	8.48479e-09	0.00299135	-2.49646e-09	-1.82332e-09	3.04339e-10	1.94697	-0.226699	0.00212284	3.5197e-09
4542.12	7.67239	-4.85197e-09	-0.0018911	6.53595e-10	7.83766e-10	-6.39531e-10	1.89932	-0.0384346	0.00166369	-5.88512e-10
4553.57	7.37049	2.25365e-09	0.000656101	2.04958e-09	2.30332e-09	1.11122e-09	2.01548	-0.157659	-0.00643739	-1.44738e-09
4565.02	6.70334	2.95336e-09	0.000374438	-1.22063e-09	-1.47975e-09	-1.69625e-10	1.79948	0.451909	0.0109485	7.58094e-10
4576.47	6.89775	-2.34077e-09	-0.00101046	-4.18553e-10	-8.23362e-10	-3.54699e-10	1.71527	-0.121115	-0.0135168	-1.86442e-09
4587.91	5.64264	4.2104e-09	0.00121355	-1.72122e-11	-1.32822e-10	3.69128e-09	1.40347	-0.407882	0.012474	-7.73736e-11
4599.36	4.72756	-2.73089e-09	-0.00106183	4.80425e-10	1.72034e-09	-4.15887e-09	0.996515	0.319197	-0.00679831	1.37965e-09
4610.8	3.57381	1.1073e-09	0.00069673	8.06273e-10	-1.32002e-10	2.8893e-10	1.09293	-0.0670502	-0.0030988	-1.89426e-09
4622.25	2.87347	-3.15894e-09	-0.000269898	9.78272e-10	-3.39015e-09	3.0801e-09	0.561429	0.17132	0.0147483	1.18702e-09
4633.7	2.34064	7.68896e-10	-9.66965e-05	-1.6546e-09	2.13759e-09	-3.55489e-09	0.485462	0.0933217	-0.0294624	1.24325e-09
4645.14	1.79462	1.10574e-09	0.0003317	-2.93947e-09	-3.57525e-10	1.24423e-09	0.271111	-0.118209	0.0409917	-8.2215e-10
4656.6	1.91168	-1.78099e-09	-0.000416789	1.93666e-09	-5.18377e-10	1.39429e-09	0.087735	0.105722	-0.0425115	1.27191e-09
4668.04	1.6136	1.1828e-09	0.000375481	5.64751e-10	1.23511e-09	-1.77368e-09	0.511798	-0.0773499	0.0277167	-1.56212e-09
4679.49	1.37192	-5.49439e-10	-0.000255089	-5.16577e-10	-2.71292e-09	3.81378e-10	-0.108419	0.0442201	0.0237344	-1.46359e-10
4690.93	1.24786	2.86856e-09	0.000108192	1.7584e-09	3.50112e-09	1.09639e-09	0.187967	-0.0116818	0.0935471	1.28617e-09
4702.38	0.85624	-2.59243e-09	2.16942e-05	-1.08649e-09	-8.80183e-10	-3.58082e-10	0.418231	-0.0185395	0.366498	-3.30932e-12
4713.84	0.2994	-1.20234e-09	-0.000108008	3.53084e-11	-3.29489e-09	-1.99851e-09	0.0447534	0.0409249	-0.207082	-5.938e-10
4725.26	0.0602167	3.84742e-09	0.000142608	9.53122e-10	3.90158e-09	1.28613e-09	0.421004	-0.0542091	-0.25209	-8.64538e-10
4736.73	-0.360146	-1.8056e-09	-0.000132326	-2.37497e-09	-1.42635e-09	1.26265e-09	0.378077	0.0566519	0.0368084	1.62185e-09
4748.16	-0.780804	-7.43002e-10	9.28884e-05	1.17376e-09	-3.64668e-10	-1.45666e-09	0.70114	-0.0451493	-0.102171	-1.57875e-09
4759.62	-0.361162	9.13662e-10	-4.24784e-05	8.37228e-10	1.72581e-09	8.69593e-10	0.702453	0.0209719	0.0440101	-1.14299e-11
4771.07	-0.311359	1.08117e-09	-3.40547e-06	-2.12038e-09	3.9435e-10	-2.09103e-10	0.689588	0.0140555	-0.00962258	3.79159e-09
4782.49	0.160664	-2.42798e-09	3.49244e-05	1.3061e-09	1.65648e-09	-1.12469e-09	1.10863	-0.0577992	-0.00741081	-2.5803e-09
4793.99	0.450926	-2.58438e-09	-4.86251e-05	1.50345e-10	-1.25977e-09	-1.80573e-10	0.898438	0.106246	0.00901827	-1.87124e-09
4805.37	0.0385428	3.42565e-09	4.64033e-05	9.15912e-10	-8.40645e-10	6.64451e-10	1.1917	-0.141832	0.00202014	1.57095e-09
4816.88	0.464914	2.58416e-10	-3.34808e-05	4.45976e-10	-1.35031e-09	7.26236e-10	1.06035	-0.0969958	-0.016959	-4.92863e-10
4828.29	0.121309	-1.99439e-09	1.61584e-05	-1.25306e-09	-1.98337e-10	5.35219e-10	0.745032	-0.00325082	0.0291788	6.8836e-10
4839.72	-0.0952138	6.65064e-10	2.56353e-08	9.26326e-11	8.64911e-10	-3.57747e-10	1.20521	0.156234	0.107583	9.23314e-10
4851.25	0.117575	1.79142e-09	-1.14151e-05	-1.15771e-09	-2.71153e-10	-3.09556e-09	0.738095	-0.0200105	-0.115635	-2.57246e-09
4862.55	-0.474926	5.78016e-10	1.65855e-05	4.09878e-10	5.65053e-10	2.79707e-09	0.46621	-0.323364	-0.0291437	-1.14951e-09
4874.19	-0.202545	-1.58787e-10	-1.60382e-05	-9.92953e-10	-6.1377e-10	1.52692e-09	0.712651	0.292539	0.0413953	1.69416e-09
4885.43	0.0961361	-1.36956e-09	1.15168e-05	-7.72748e-10	1.00977e-09	-2.41249e-09	0.495655	-0.128128	-0.0369037	-9.48922e-10
4897.04	-0.06385	-5.96078e-10	-5.25483e-06	8.72617e-10	4.11183e-10	1.43915e-09	0.362395	-0.0151336	0.0259386	2.09876e-09
4908.49	0.0393842	1.01664e-09	-6.31162e-07	-3.53191e-10	5.31718e-10	-1.31905e-09	0.0423984	0.336951	-0.0130621	-9.08002e-10
4919.75	-0.0182268	-3.2019e-10	4.66217e-06	1.87617e-09	2.35236e-10	-6.17643e-10	-0.0592249	-0.250587	0.00102875	-8.54756e-10
4931.79	-0.000417674	7.88579e-10	-6.06716e-06	1.60684e-10	-3.62332e-09	7.5173e-10	0.044893	0.0680505	0.00773147	7.01065e-09
4942.33	0.0164594	-4.42833e-09	4.75019e-06	1.69295e-09	1.96445e-09	5.38431e-09	-0.0335125	0.103216	-0.0109664	-2.09718e-08
