# Supplementary material for: How spatial release from masking may fail to function in a highly directional auditory system
Source: eLife. 2017 Apr 25;6:e20731. doi: 10.7554/eLife.20731 (PMC5443663; doi:10.7554/eLife.20731)
Supplement: Figure 2—source data 2. — Masker presentation started and ended 0.5 and 4.5 s after the onset of data acquisition, respectively. Signal presentation started and ended 1.0 and 4.0 s after the onset of data acquisition, respectively. Data plotted in Figure 2B. DOI: http://dx.doi.org/10.7554/eLife.20731.005 [file elife-20731-fig2-data2.xlsx]

## Sheet: Response to Noise Alone Steer
Time	Fly1	Fly2	Fly3	Fly4	Fly5	Fly6	Fly10	Fly11	Fly12	Fly13
9.04816	-7.94694e-06	5.89746e-06	0.323897	-2.78749e-06	0.0366269	6.17689e-07	0.00105129	-1.31188e-05	1.34377e-05	1.11582e-05
20.6654	1.10364e-05	1.66261e-06	0.268728	2.13783e-05	-0.044938	-1.45132e-06	-0.000557862	1.24295e-05	-5.64695e-06	-1.62765e-06
32.0169	-1.16139e-05	-1.18106e-05	0.325356	-4.03742e-05	0.0431368	2.13331e-06	-0.000334053	-7.16824e-06	-7.34732e-06	-1.24487e-05
43.516	8.43015e-06	2.21311e-05	0.0940755	5.33975e-05	-0.0279196	-2.3652e-06	0.00148375	-2.76336e-06	2.32424e-05	2.81201e-05
54.9464	-1.00983e-06	-2.91392e-05	-0.13416	-5.34626e-05	-0.0104552	1.87888e-06	-0.00260299	1.58951e-05	-3.77728e-05	-4.06523e-05
66.3754	-9.86102e-06	2.90347e-05	0.15558	3.51291e-05	0.0961863	-5.41684e-07	0.00329359	-2.9039e-05	4.53603e-05	4.44135e-05
77.8637	2.18785e-05	-1.88797e-05	-0.232932	2.97685e-06	-0.434026	-1.5413e-06	-0.00313821	3.76704e-05	-4.04869e-05	-3.44404e-05
89.2613	-3.13802e-05	-2.0279e-06	-0.418561	-5.59892e-05	0.0522054	3.96399e-06	0.00183579	-3.69276e-05	1.96222e-05	8.42775e-06
100.751	3.40395e-05	3.09783e-05	0.0355973	0.00011187	0.399547	-6.03345e-06	0.00064613	2.31472e-05	1.6729e-05	3.13656e-05
112.171	-2.60791e-05	-6.13565e-05	-8.61189e-05	-0.000152559	-0.132671	6.88875e-06	-0.00394637	4.37244e-06	-6.25136e-05	-7.69869e-05
123.626	5.80223e-06	8.32898e-05	-0.0137122	0.000157682	0.0432297	-5.72747e-06	0.00726669	-4.18915e-05	0.000105896	0.00011515
135.079	2.49523e-05	-8.56877e-05	0.0209217	-0.000110602	0.00610977	2.10668e-06	-0.00946257	8.066e-05	-0.000130921	-0.000129584
146.511	-5.99657e-05	5.95561e-05	-0.0219393	5.71901e-06	-0.0335905	3.75405e-06	0.00929827	-0.000107839	0.000121286	0.000105391
157.976	8.89516e-05	-1.97268e-06	0.0179723	0.000144988	0.0463554	-1.07714e-05	-0.00584813	0.000109214	-6.58194e-05	-3.47592e-05
169.408	-9.93998e-05	-8.03665e-05	0.0124442	-0.000308739	-0.0458975	1.70104e-05	-0.00104522	-7.35236e-05	-3.55246e-05	-7.7387e-05
180.864	7.99586e-05	0.000169434	0.0947642	0.000434551	0.0360876	-1.99954e-05	0.0103965	-2.43074e-06	0.000166996	0.000209753
192.307	-2.48312e-05	-0.000237345	-0.14478	-0.000463197	-0.0219064	1.7337e-05	-0.019936	0.000109304	-0.000295872	-0.000325167
203.753	-6.19037e-05	0.000251851	0.0148248	0.000344174	0.00354461	-7.59208e-06	0.0265458	-0.000223186	0.000376647	0.000376754
215.204	0.000163569	-0.000185624	0.0833294	-5.67565e-05	0.0169148	-8.8439e-06	-0.0271074	0.000307755	-0.000361382	-0.000320047
226.645	-0.000251367	2.77369e-05	-0.56726	-0.000370395	-0.0379804	2.91039e-05	0.0193568	-0.000321612	0.000215216	0.00012933
238.098	0.00028924	0.000205722	0.0690241	0.000848463	0.0594177	-4.78042e-05	-0.0019483	0.000230433	6.61628e-05	0.000185647
249.541	-0.00024326	-0.0004659	0.698635	-0.00123394	-0.0846005	5.78477e-05	-0.0256748	-2.17498e-05	-0.000442318	-0.000568235
260.989	9.42143e-05	0.00067431	0.582875	0.00135526	-0.0619704	-5.21534e-05	0.0537419	-0.000281638	0.000823369	0.000914884
272.436	0.000149617	-0.00073748	0.325764	-0.00106027	0.123569	2.61037e-05	-0.0804732	0.000614825	-0.00108029	-0.00109131
283.882	-0.000443819	0.000572873	0.262641	0.000276762	-0.00826215	1.98346e-05	0.0986906	-0.000875572	0.0010728	0.000965858
295.331	0.000708052	-0.000141914	0.913889	0.000929366	-0.0121953	-7.81446e-05	-0.0876261	0.000943841	-0.000692557	-0.000455654
306.776	-0.000838735	-0.000518284	0.179594	-0.0023194	0.0167706	0.000133902	0.024334	-0.000715503	-8.64353e-05	-0.000425014
318.224	0.000735032	0.00127594	0.0643255	0.00349204	-0.0152168	-0.000166822	0.396373	0.000144668	0.00116391	0.00152921
329.67	-0.000334731	-0.00191036	0.6128	-0.00395335	0.0109656	0.000156008	0.149324	0.000715986	-0.00229324	-0.0025716
341.117	-0.000348237	0.00215087	0.47822	0.00324679	-0.0053835	-8.69029e-05	0.144779	-0.00169127	0.00310236	0.00316597
352.564	0.00119684	-0.00174978	1.2385	-0.00112431	0.000314921	-4.10421e-05	-0.686856	0.00249106	-0.00316883	-0.00291243
364.011	-0.00198817	0.000578618	1.06943	-0.0022813	0.00257791	0.000208324	-0.446825	-0.00276135	0.00215349	0.00153186
375.458	0.00242568	0.00127819	0.939501	0.00633776	-0.00340144	-0.000373732	0.181647	0.00218339	3.16166e-05	0.000974048
386.905	-0.00221018	-0.00346611	1.63033	-0.00990945	0.00200868	0.000479496	-0.320906	-0.000606576	-0.00307925	-0.00418524
398.352	0.0011414	0.0053747	1.50349	0.01153	0.00119962	-0.000464274	0.0486751	-0.00182218	0.00626113	0.00723846
409.799	0.000770869	-0.00623544	1.37715	-0.00978725	-0.00493075	0.000282775	0.054088	0.00459764	-0.00854289	-0.00897156
421.245	-0.00321937	0.00532079	1.63731	0.00388958	0.00727679	7.20063e-05	-0.0921351	-0.00690301	0.00881957	0.00820271
432.692	0.00557816	-0.00225102	1.56404	0.00576362	-0.00662506	-0.000550445	0.0660191	0.00777032	-0.00661326	-0.00444236
444.139	-0.00698671	-0.00289738	1.34798	-0.0172458	0.00268326	0.00103967	0.359709	-0.00651716	0.00193719	-0.00178514
455.586	0.00655983	0.00933058	1.54731	0.0270568	0.00268857	-0.0013757	0.24707	0.00286533	0.00491484	0.00888566
467.033	-0.00369079	-0.015662	1.86351	-0.0313862	-0.00769978	0.00137806	-0.181521	0.0029473	-0.0154584	-0.0165022
478.48	-0.00161841	0.018926	1.87159	0.0276872	0.0177802	-0.000904722	0.312566	-0.011172	0.0301557	0.0268259
489.927	0.00845458	-0.0148895	1.42792	-0.0162652	-0.0238299	-8.18859e-05	0.559217	0.0216897	-0.0291621	-0.0260844
501.374	-0.0151238	0.0100443	1.52212	-0.00341457	0.0312392	0.00145506	0.428542	-0.0245184	0.0389454	0.0296342
512.821	0.019485	0.00997683	1.71105	0.0411515	-0.0320505	-0.00289581	0.400324	0.0296855	-0.0140349	-0.0134208
524.267	-0.0197429	-0.0266017	1.22272	-0.0698726	0.04581	0.00392495	0.318391	-0.0139483	-0.0157686	-0.000346108
535.714	0.0139092	0.0646524	1.2001	0.111001	-0.131974	-0.00401388	0.394252	-0.00545197	0.13189	0.0461058
547.161	0.00176369	-0.0806917	0.867863	-0.134481	-0.787928	0.00275713	0.596525	0.0640656	-0.736402	-0.723046
558.608	-0.0184827	-0.32022	0.685776	0.159476	-0.180315	-6.8154e-05	0.657822	-0.389047	-1.76215	-0.955425
570.055	0.0445538	-0.794014	0.804367	-0.207819	-0.0325022	-0.0036265	0.42309	-0.731832	-1.88681	-0.851298
581.502	-0.0644706	-0.889305	0.0580356	-1.65363	-0.8845	0.00750108	0.663164	-0.868313	-1.76524	-1.22669
592.949	0.0916896	-0.979201	-0.0805622	-1.19887	-0.484404	-0.0105837	0.719925	-1.01889	-1.82601	-1.07084
604.396	-0.122739	-1.82654	0.0797515	-0.991008	-0.303646	0.0121323	0.444884	-0.991294	-1.57999	-1.03602
615.842	-0.441154	-1.88565	-0.079142	-0.893012	-0.371777	-0.0107642	0.502079	-0.5114	-1.32044	-1.26894
627.289	-0.498367	-1.76877	0.05801	-0.334747	-0.21006	0.00281485	0.471028	-0.333883	-1.29679	-1.3575
638.736	-0.671136	-1.59731	-0.0342431	-0.210507	-0.402687	0.00619829	0.661202	-0.0915033	-1.06608	-1.37827
650.183	-0.449814	-1.18283	-0.0103154	0.170842	0.0227013	-0.0232984	0.518143	1.09691	-0.872722	-1.31788
661.63	-0.750847	-1.06563	0.0814298	-0.291704	0.0852127	0.0425055	0.853717	0.374309	-0.433058	-0.870718
673.077	-0.33208	-0.805372	-0.367909	-0.304641	-0.296677	-0.0696191	0.148241	0.671709	-0.337252	-0.723638
684.524	-0.0165144	-1.05437	-0.287867	-0.193551	0.125074	0.090173	-1.09983	2.02934	-0.166394	-0.603248
695.971	-0.979558	-1.17305	0.0798686	-0.115555	0.106172	0.365675	0.350901	0.690515	0.112186	0.158991
707.418	-0.644721	-1.15424	-0.0257054	0.318905	0.157175	0.339817	0.724468	1.09861	-0.109622	-0.253376
718.864	-0.677073	-1.11577	0.00127948	0.141202	0.452974	0.289601	0.318408	0.324433	0.274997	-0.374736
730.311	-1.316	-0.756703	0.0105039	0.437416	0.325251	0.159279	0.527001	-1.17242	0.605741	0.000242624
741.758	-1.57501	-0.4945	-0.0144957	0.0109738	1.51754	0.439157	0.351623	0.894508	0.822866	-0.0337788
753.205	-1.81876	-0.206018	0.015494	-0.0651257	0.99533	0.704567	0.747335	1.37692	1.28409	0.723886
764.652	-1.23299	-0.504988	-0.0111245	1.00394	-0.80034	0.368421	0.98163	0.722618	1.15831	0.584179
776.099	-1.34989	-0.499551	0.00735616	0.648883	0.505325	-0.0699422	1.16228	0.700643	1.09247	0.689041
787.546	-1.56488	-0.275087	-0.00358994	-0.10638	0.454947	-0.0403515	1.43209	0.596747	1.53455	1.12823
798.993	-0.786464	-0.528066	-0.000189894	0.0521932	-0.192386	0.41485	1.42254	1.12827	1.60381	0.849263
810.44	-0.660707	-0.542112	0.00312762	0.516964	1.24669	0.19014	0.800509	1.23168	1.49795	0.994064
821.886	-1.38823	-0.939016	-0.00456667	-0.103876	0.875209	0.0957977	0.702138	0.851838	1.85906	0.873194
833.333	-1.70956	-1.29056	0.0044493	-0.655651	0.252724	0.727929	1.21522	0.754012	1.99917	1.11821
844.78	-1.5885	-1.19412	-0.00323282	-0.227041	0.439655	0.528687	0.649263	0.553024	1.82909	1.50028
856.227	-1.84334	-1.42854	0.00154991	-0.443838	0.136399	0.216127	0.584079	0.519502	1.69735	1.52965
867.674	-1.43895	-1.66767	1.62729e-05	-0.192691	0.515616	0.401486	0.731051	0.650682	1.65464	1.32688
879.121	-1.13225	-1.29975	-0.00108572	0.0328849	0.359768	0.165492	0.415167	0.537079	1.3116	0.630328
890.568	-1.60984	-1.36313	0.0015275	-0.0314442	-0.382086	-0.0348858	0.907685	0.618837	0.745233	0.730816
902.015	-1.80151	-2.07357	-0.00141777	-0.117171	-0.0095154	-0.0280328	0.68637	0.524744	0.606604	0.869534
913.462	-1.64774	-2.03504	0.000958176	-0.490138	0.339846	0.0713157	0.537521	0.266607	0.269985	0.404879
924.908	-1.50435	-1.91861	-0.000389724	-0.167512	0.369862	-0.134292	1.28751	0.0928956	-0.0301584	0.361944
936.355	-1.93159	-2.08723	-7.83447e-05	-1.2603	0.618634	-0.444281	0.940669	-0.365438	-0.0118605	0.101882
947.802	-2.30036	-1.68266	0.000316119	-1.92063	0.347942	-0.0268494	0.838833	-0.819324	0.00463891	-0.0734846
959.249	-2.12858	-1.4646	-0.0002934	-0.960515	-0.043745	0.0564149	0.980174	-0.770639	-0.00051471	0.0417865
970.696	-1.39858	-1.46022	7.39096e-05	-0.845636	-0.00963391	-0.062698	0.583815	-0.296082	-0.0313442	-0.0243218
982.143	-1.36517	-1.23767	0.000212061	-0.462554	0.0307646	0.0580411	1.09919	0.123066	0.0661502	0.00507906
993.59	-2.08233	-1.32782	-0.000409514	-0.178325	-0.0360683	-0.0281001	1.28333	0.77259	-0.120604	0.000973993
1005.04	-1.94832	-1.78424	0.000386611	0.021359	0.0159281	-0.269419	0.681417	1.14342	0.220849	-0.00563755
1016.48	-2.13995	-1.70468	-7.91908e-05	0.70813	0.00670686	-0.591126	0.603362	0.818691	0.37854	0.00390133
1027.93	-2.25516	-1.20553	-0.000477582	0.834656	-0.0433071	-0.228785	0.392056	0.904519	0.051683	0.000425354
1039.38	-1.68926	-1.66036	0.00113944	1.00061	0.0839628	0.0482991	-0.017759	0.547569	0.435383	-0.0054525
1050.82	-1.85099	-1.74046	-0.00167221	1.13388	-0.143338	-0.0580897	-0.0112458	0.129295	0.110851	0.00871773
1062.27	-1.75123	-1.2756	0.00180371	1.08807	0.277597	0.112718	0.00941042	0.405405	-0.113148	-0.00485547
1073.72	-1.71761	-1.54183	-0.00130638	1.08186	0.781635	-0.308652	-0.0141487	0.0361045	0.109689	0.00185579
1085.16	-1.97942	-1.52039	9.64015e-05	0.824674	0.161827	-0.330767	0.00589336	-0.121318	-0.117902	0.0160156
1096.61	-1.38854	-1.37868	0.00167817	0.59389	-0.143917	0.00884505	-0.00513852	0.162039	0.152747	-0.0324965
1108.06	-1.36693	-1.30119	-0.00360439	0.213733	0.170501	0.0710592	0.00125792	-0.238831	0.429921	0.070518
1119.51	-1.88083	-1.21113	0.00505261	0.0819044	0.872897	0.363282	-0.000425144	-0.403195	0.0557008	-0.139412
1130.95	-1.69523	-1.19894	-0.0053254	-0.493779	0.661042	0.394757	0.000155245	0.0094993	-0.136362	-0.435873
1142.4	-1.83793	-1.00404	0.00399204	-1.26581	0.23105	0.300436	0.000309015	-0.00293101	0.407531	-0.75998
1153.85	-1.88083	-1.00174	-0.000951629	-1.07643	0.816631	-0.0702556	-0.000485326	0.0209995	0.271876	-0.938246
1165.29	-1.15279	-1.07577	-0.0034523	-1.46854	0.492237	0.103043	0.000206315	-0.0436686	-0.0951927	-0.601768
1176.74	-1.35686	-0.848953	0.00914962	-1.52805	0.0273981	0.492683	0.000342667	0.0623014	0.0813208	-0.901799
1188.19	-1.89353	-0.659683	-0.0154463	-1.23381	0.524849	-0.0235502	-0.000675906	0.460955	-0.126716	-0.625552
1199.63	-1.87419	-1.14504	0.0164096	-1.70898	0.73412	-0.0428679	0.000381605	0.0767589	0.32592	0.151032
1211.08	-1.99305	-1.43798	-0.0206588	-1.52965	0.575719	0.0833852	0.000702988	-0.0705294	0.339314	-0.103915
1222.53	-1.98022	-1.38667	0.00750356	-1.48038	0.65161	-0.119033	-0.00238023	0.0575361	-0.07071	0.081733
1233.97	-2.16875	-1.32978	0.00655703	-1.82183	0.663452	0.14514	0.0040927	-0.042123	0.029085	0.395224
1245.42	-2.08449	-1.06739	-0.0599112	-1.6891	0.731102	-0.194861	-0.00504964	0.0257572	-0.055756	0.274608
1256.87	-1.27752	-1.21493	0.234831	-2.01259	0.936903	-0.435664	0.00446588	-0.0113812	0.444169	0.45334
1268.31	-1.26217	-0.970081	0.510648	-2.06865	0.453125	0.0320271	-0.00187293	-0.00224095	0.188029	0.584711
1279.76	-1.9402	-0.755445	0.843027	-1.45258	0.589162	-0.0671768	-0.00258699	0.00914041	-0.0989641	0.399727
1291.21	-1.71597	-0.952008	1.10912	-1.90408	1.21919	0.257571	0.00791771	-0.0126183	0.0805333	0.0132128
1302.66	-1.06278	-0.538042	1.02857	-1.48973	0.62547	0.388258	-0.0124567	0.0129436	-0.117158	-0.0342827
1314.1	-1.67542	-0.664022	1.28237	-0.501535	0.495075	-0.0748035	0.0145742	-0.0102961	0.406241	0.0321737
1325.55	-2.2397	-1.07788	1.85198	-1.40525	1.00283	0.00879936	-0.0137291	0.00582077	0.252891	-0.0277164
1337	-2.14215	-1.07295	1.87477	-1.76399	1.0814	0.020841	0.00987337	-0.00104606	-0.062977	0.0155988
1348.44	-1.82625	-0.926125	1.56488	-1.45302	1.04666	-0.0250628	0.00154625	-0.00276625	-0.00801771	-0.00848183
1359.89	-1.19755	-0.381488	1.55226	-1.48377	0.972602	0.0169454	-0.015611	0.00497445	0.061115	-0.00173942
1371.34	-1.94973	-0.302018	1.0737	-1.08664	0.487468	0.00532336	0.0343124	-0.00549818	0.464845	0.00649145
1382.78	-2.30838	-0.434307	1.01825	-0.58094	0.257952	-0.0338412	-0.057982	0.00465411	0.0627181	-0.00798957
1394.23	-1.85795	-0.041978	1.01819	-0.896902	0.504007	0.0689657	0.094447	-0.00293954	-0.0780317	0.00750418
1405.68	-2.18803	0.0227854	0.39996	-1.29477	0.111049	-0.111889	-0.190961	0.000855978	0.0714573	-0.00556726
1417.12	-2.16924	-0.0126193	0.501953	-0.451703	0.689026	-0.399192	-0.443591	0.00117958	-0.0569106	0.00289779
1428.57	-1.98161	0.0282491	0.0996232	-0.290167	1.01074	-0.241252	0.0523259	-0.00284738	0.0384833	-0.000259931
1440.02	-1.63566	-0.0599182	-0.06381	-0.598565	-0.0082147	-0.403959	-0.013707	0.00389886	-0.0213751	-0.0016951
1451.47	-1.55566	0.127954	0.759815	-0.125414	-0.0114832	-0.438604	0.00228144	-0.00413193	0.00104664	0.00268044
1462.91	-2.05752	0.366199	1.62908	0.0203283	0.0136766	-0.0818954	-0.00360199	0.00339722	0.00739295	-0.00272647
1474.36	-2.2413	0.477841	2.39585	0.0155056	-0.00990136	0.0618196	0.00905641	-0.00164715	-0.0143114	0.00208972
1485.81	-2.32988	0.117077	2.35037	-0.0371394	-0.00366449	-0.0501512	0.513697	-0.00098232	0.0200456	-0.001127
1497.25	-2.56963	0.145426	2.0791	0.0640038	0.0019347	0.0287213	0.042298	0.0040884	-0.0447119	0.000172431
1508.7	-2.76204	0.435803	1.89717	-0.0899288	0.00951689	0.00740092	-0.0980926	-0.00696132	0.169437	0.000541766
1520.15	-2.28187	-0.018384	1.95725	0.199854	-0.0753156	-0.0754283	0.422588	0.00864062	0.536544	-0.000912535
1531.59	-2.16373	-0.0354328	1.74651	0.857256	0.478304	0.500115	0.224183	-0.00811263	0.379774	0.000951617
1543.04	-2.71511	0.0476298	1.55676	0.0728959	0.106561	0.101578	-0.0440232	0.00466289	-0.00375888	-0.000747868
1554.49	-2.50082	-0.048022	1.55067	0.201613	0.143198	0.0501494	-0.0587899	0.00169989	0.208223	0.000422626
1565.93	-2.71278	0.0362126	0.536848	0.517897	0.438001	0.883372	0.355372	-0.0099076	0.481288	-9.07248e-05
1577.38	-2.72327	-0.0229849	0.187381	-0.682356	-0.0395478	0.187126	0.294087	0.0176858	0.349031	-0.000165319
1588.83	-2.53226	0.00787894	0.0132917	-1.35297	0.443502	-0.109703	-0.0831804	-0.0222334	0.0724083	0.000305715
1600.27	-2.84191	0.00237044	-0.152847	-1.69797	0.172684	0.0862871	0.026792	0.0213116	-0.0552941	-0.000330451
1611.72	-1.85464	-0.00919968	0.30248	-1.83973	-0.196051	-0.0681462	-0.00925133	-0.014881	0.0259152	0.000267602
1623.17	-1.83792	0.0125386	-0.670739	-1.77335	0.449887	0.0467853	0.00509943	0.00335395	-0.00233187	-0.000158248
1634.62	-2.24881	-0.012191	-0.743023	-1.65801	0.267293	-0.0298532	-0.0139237	0.0186717	-0.0221672	4.267e-05
1646.06	-1.95299	0.00899849	-0.618739	-1.49843	-0.164341	0.0118241	0.0299244	-0.0391211	0.0401779	4.92062e-05
1657.51	-2.70675	-0.00445671	-0.964635	-1.71542	0.276076	-0.00134265	-0.0543608	0.0724344	-0.0658868	-0.000102037
1668.96	-2.84441	9.89109e-05	0.129859	-1.86171	0.37956	-0.00917347	0.0822472	-0.0941617	0.0940188	0.000114492
1680.4	-2.9653	0.00302633	-0.0362356	-1.81572	-0.044873	0.0189993	0.460449	0.131838	0.442343	-9.54488e-05
1691.85	-3.21316	-0.00448856	0.186382	-1.70297	0.00657287	-0.0265111	0.0566563	-0.199011	0.092508	5.88223e-05
1703.3	-3.06868	0.00441237	1.17285	-1.75437	-0.00753831	0.0317763	-0.0648742	-0.875963	-0.149152	-1.86988e-05
1714.74	-2.86632	-0.00327644	0.872497	-1.80809	0.0210512	-0.035946	0.0582739	-0.444571	0.403944	-1.41391e-05
1726.19	-1.95265	0.00167789	0.58818	-1.9034	-0.046674	0.03612	-0.0451049	-1.1224	0.301933	3.38589e-05
1737.64	-1.8795	-0.000145492	1.06291	-2.15876	0.0869237	-0.0291248	0.0287948	-1.37853	-0.213945	-3.95357e-05
1749.08	-1.84616	-0.000968093	1.43274	-2.08439	0.472364	0.0123848	-0.0136537	-0.680355	0.0542658	3.39303e-05
1760.53	-1.34801	0.00151723	1.15314	-2.04733	0.0228585	0.0211416	-0.00092285	-0.928574	0.113929	-2.17314e-05
1771.98	-1.42488	-0.00153591	1.3791	-2.09206	-0.0479769	-0.0882421	0.00865068	-0.759895	-0.0578922	7.84768e-06
1783.42	-1.26837	0.00117627	1.84499	-2.16331	0.0577535	0.277845	-0.0126233	-0.671708	0.0302206	3.84986e-06
1794.87	-1.25055	-0.00063707	2.51902	-2.21563	-0.0673508	-0.0651236	0.0132507	-0.473855	-0.0117232	-1.11629e-05
1806.32	-0.981723	0.000102072	3.00652	-2.07843	0.0816421	-0.193232	-0.0107995	-0.343753	-0.00622717	1.36068e-05
1817.77	-0.456983	0.000300038	2.89626	-2.04759	-0.113494	0.0613479	0.00643886	-0.816804	0.0152744	-1.20233e-05
1829.21	-0.710653	-0.000510701	3.39103	-1.74087	0.221314	-0.0378637	-0.00171538	-0.412622	-0.0234106	7.98459e-06
1840.66	-0.954259	0.000535123	3.0347	-1.36794	0.42185	0.235311	-0.00208916	-0.267448	0.0236527	-3.19612e-06
1852.11	-0.97766	-0.000422262	2.69019	-1.44889	-0.0509806	0.0813888	0.00433284	-0.334431	-0.0196645	-9.57311e-07
1863.55	-0.835483	0.000240045	3.05088	-1.42439	0.00167842	0.132024	-0.00496821	0.109237	-0.0189457	3.65352e-06
1875	-0.325515	-5.32485e-05	2.31425	-1.46543	0.0169095	0.174391	0.00436496	-0.0385058	0.293669	-4.66685e-06
1886.45	-0.339179	-9.13324e-05	2.15103	-1.30502	-0.0245552	-0.107072	-0.00306089	-0.0132765	0.384114	4.2472e-06
1897.89	-0.571427	0.000170973	1.94271	-0.574207	0.0252418	0.0533508	0.00154528	0.456858	0.264207	-2.91908e-06
1909.34	-0.793138	-0.000185467	1.55742	-0.437384	-0.0224778	-0.00762153	-0.000139863	0.175422	0.363623	1.2731e-06
1920.79	-1.01414	0.000150536	2.12035	-0.365333	0.014424	-0.0323922	-0.00101805	-0.174191	0.340632	1.96988e-07
1932.23	-0.759179	-8.93231e-05	1.94586	0.0934011	-0.00772219	0.0638813	0.00191751	0.324902	0.472854	-1.18576e-06
1943.68	-0.606484	2.45649e-05	1.62538	-0.0734213	0.00130248	-0.094007	-0.00258144	0.327941	0.470287	1.59484e-06
1955.13	0.0361442	2.68366e-05	1.53782	0.102775	0.00410303	-0.0292498	0.002981	0.00150759	0.158389	-1.49571e-06
1966.58	0.451476	-5.62407e-05	1.66645	0.912299	-0.00727436	0.0921536	-0.00299222	-0.0638994	0.444034	1.06229e-06
1978.02	0.159513	6.29737e-05	1.90482	1.02844	0.00788829	-0.00855255	0.0024172	0.0905207	0.364573	-4.9849e-07
1989.47	0.653497	-5.21792e-05	0.19239	0.820408	-0.00652963	0.000840214	-0.00107462	0.460859	0.311384	-2.02252e-08
2000.92	0.535616	3.18684e-05	-0.258249	0.953944	0.00420757	-0.00463854	-0.00105994	0.0409751	0.403671	3.81089e-07
2012.36	0.249453	-1.00978e-05	1.55501	0.552262	-0.00182002	0.0104413	0.00371378	-0.0387111	-0.0295946	-5.42945e-07
2023.81	0.516085	-7.06432e-06	1.3959	-0.0459245	-8.2104e-05	-0.0223555	-0.00625731	0.031687	0.324607	5.25138e-07
2035.26	0.0750792	1.65354e-05	1.26141	-0.00774513	0.00135727	-0.114784	0.00778963	-0.0536046	0.312558	-3.84942e-07
2046.7	0.0380221	-1.82171e-05	1.23116	0.0589373	-0.00216573	0.0479701	-0.00736918	0.458454	-0.106055	1.92519e-07
2058.15	-0.101783	1.42401e-05	0.216844	-0.391458	0.00277088	0.0927128	0.00448863	0.16935	0.0218397	-1.00496e-08
2069.6	-0.456071	-7.83806e-06	-0.0224532	-1.40053	-0.00334316	-0.00298854	0.000572104	-0.0987117	0.0311753	-1.21053e-07
2081.04	-0.0437696	2.17732e-06	-0.0121676	-1.60223	0.00383099	-0.0207254	-0.00687915	0.0672485	-0.0712742	1.84083e-07
2092.49	0.0541326	5.75906e-07	0.0575919	-1.50678	-0.0039367	0.0283609	0.0140359	-0.0432331	0.0922266	-1.83814e-07
2103.94	-0.0448374	2.11847e-07	-0.27589	-1.8777	0.00321227	-0.0233478	-0.0226463	0.0224804	0.432892	1.38938e-07
2115.38	0.0175462	-3.57897e-06	-0.387444	-1.7576	-0.0012633	0.00353193	0.025759	-0.00572088	0.0944845	-7.35194e-08
2126.83	0.0222719	7.34602e-06	0.0879044	-1.86676	-0.00198991	0.040128	-0.0246447	-0.00849247	-0.0809246	9.52223e-09
2138.28	-0.0787684	-8.84935e-06	-0.00423248	-1.72683	0.00609542	-0.165757	0.0142806	0.0146553	0.0612419	3.79145e-08
2149.73	0.199675	5.86194e-06	-0.0692665	-1.8159	-0.0100082	0.0574697	0.0107071	-0.0168527	-0.0405161	-6.21435e-08
2161.17	0.411265	2.50153e-06	0.220885	-2.29134	0.0122324	-0.065364	-0.070503	0.0151944	0.0222205	6.41303e-08
2172.62	-0.00269946	-1.51175e-05	0.27908	-2.00011	-0.0113669	-0.0761189	0.37446	-0.0103504	-0.00962133	-4.99509e-08
2184.07	-0.0457318	2.86792e-05	0.311881	-1.8211	0.00677116	0.287805	0.2806	0.00417347	-0.000112236	2.78158e-08
2195.51	0.0530704	-3.81759e-05	0.382818	-1.65653	0.00109542	-0.21986	-0.093915	0.0013682	0.00341218	-5.438e-09
2206.96	-0.0373	3.80803e-05	-0.092928	-1.64971	-0.0117689	-0.117565	0.0378896	-0.00497114	-0.00521608	-1.16428e-08
2218.41	0.0110868	-2.41226e-05	-0.0177693	-1.42237	0.02631	0.067807	-0.00854002	0.00625768	0.00714315	2.08675e-08
2229.85	0.0243921	-4.71751e-06	0.430472	-1.21503	-0.0369345	-0.344609	-0.00764354	-0.00556481	-0.0141359	-2.23247e-08
2241.3	-0.0591573	4.45706e-05	0.159439	-1.18761	0.0435196	-0.0192123	0.0140841	0.00364792	0.022305	1.79064e-08
2252.75	0.0823427	-8.60582e-05	0.031212	-0.59839	-0.0409543	0.178101	-0.0156366	-0.00135887	-0.0347593	-1.04449e-08
2264.19	-0.0753054	0.000115306	-0.34359	-0.35456	0.024759	-0.0823083	0.0104903	-0.000599861	0.0509011	2.65345e-09
2275.64	-0.348098	-0.000116918	-0.282451	-0.061536	0.0224398	-0.0759926	-0.00447299	0.0018028	-0.0734316	3.49569e-09
2287.09	-0.279231	7.86757e-05	0.0289475	0.020005	-0.452574	0.131173	-0.00341128	-0.00212607	0.11974	-6.9912e-09
2298.53	-0.365706	2.91914e-06	0.0446232	0.169759	-0.151716	0.0523756	0.00690168	0.00170038	0.465726	7.75579e-09
2309.98	-0.0796692	-0.000117822	0.457742	0.727678	0.0642642	-0.17387	-0.0069284	-0.000823824	0.00445105	-6.39811e-09
2321.43	0.059874	0.000240281	0.0789297	0.764873	-0.0269892	-0.0134027	-0.00143371	-0.000139302	-0.0346902	3.89428e-09
2332.88	-0.0304313	-0.000331184	-0.0527012	0.779288	0.0130227	0.0295558	0.0186826	0.000853355	0.0456527	-1.17896e-09
2344.32	0.0112476	0.000345967	-0.0582104	0.771888	-0.0179896	-0.0287292	-0.0652757	-0.00108631	-0.0504617	-1.02838e-09
2355.77	-0.000506376	-0.000247668	-0.584502	0.772033	0.0647034	0.0226814	0.261308	0.000757674	0.0513868	2.32632e-09
2367.22	0.00875189	2.27823e-05	-0.357941	0.292287	-0.437324	-0.0143979	0.409153	4.37858e-05	-0.052523	-2.67879e-09
2378.66	-0.0330559	0.000304275	-0.0867188	0.00106706	-0.189233	0.00574375	-0.137237	-0.00107385	0.0455914	2.2731e-09
2390.11	0.0976253	-0.000663601	0.0558001	0.411315	0.0510948	0.00125866	0.0724686	0.00197846	-0.0381158	-1.44326e-09
2401.56	-0.305926	0.000944588	-0.0194651	0.195095	-0.550849	-0.00483227	0.465317	-0.00236992	0.0179581	5.0815e-10
2413	-0.340652	-0.0010168	-0.0383273	-0.104974	-0.00649617	0.00640163	0.0718321	0.00192864	0.0110098	2.87183e-10
2424.45	0.0606193	0.000766928	0.423054	-0.842395	0.0808294	-0.00634928	-0.0474653	-0.000519957	-0.0761693	-7.74195e-10
2435.9	0.0089937	-0.000146329	0.209056	-1.22071	-0.487901	0.00492225	0.0299897	-0.00169733	0.490888	9.28978e-10
2447.34	-0.0259443	-0.000782825	-0.0522005	-0.96195	-0.139326	-0.00270436	-0.0187542	0.00421268	0.108544	-8.12615e-10
2458.79	-0.8171	0.00182273	-0.175349	-1.06953	0.0505941	0.00042816	0.00788897	-0.00621392	0.121322	5.23918e-10
2470.24	-1.17364	-0.00265728	-0.473049	-0.873099	-0.0246704	0.00131616	-0.000859473	0.00677578	0.643387	-2.08846e-10
2481.68	-1.0282	0.00292258	-0.299001	-1.04103	0.015358	-0.002238	-0.00404163	-0.00515345	0.25576	-6.68181e-11
2493.13	-1.09573	-0.00231374	-0.468179	-0.744127	-0.00882113	0.00233899	0.00247541	0.00122578	0.429431	2.64623e-10
2504.58	-0.798143	0.000703981	-0.595324	-0.347573	0.00590873	-0.00183298	0.000721852	0.00430125	0.1807	-3.30506e-10
2516.03	-1.30201	0.00173321	-0.139222	-0.360931	-0.0024265	0.00102615	-0.00452704	-0.0102149	-0.0548877	2.86554e-10
2527.47	-1.284	-0.0046165	-0.00252337	0.057081	0.00152854	-0.000207705	0.00869008	0.015936	0.0125288	-1.80863e-10
2538.92	-0.936252	0.00741243	0.0811364	-0.0383981	0.00102535	-0.000418391	-0.0123825	-0.0214989	-0.016212	8.14446e-11
2550.37	-1.47444	-0.00945764	-0.214274	0.255483	-0.00359084	0.000757054	0.0123775	0.0202168	0.467178	1.27413e-11
2561.81	-1.21171	0.00902196	-0.413056	0.69816	0.0046085	-0.000811546	-0.00649859	-0.0140413	0.118343	-8.07589e-11
2573.26	-1.70244	-0.00282659	0.0387963	0.638457	-0.00401228	0.000652904	-0.00616731	-0.00154607	-0.0733859	1.08629e-10
2584.71	-2.5571	-0.00419229	0.0139515	0.639123	0.00249805	-0.000382604	0.0278432	0.0306838	0.0470584	-1.13452e-10
2596.15	-2.36919	0.0184362	-0.0277926	0.569465	-0.000858311	9.91394e-05	-0.0629939	-0.0900918	-0.0545099	7.11752e-11
2607.6	-2.2387	-0.0312778	0.0271992	0.660359	-0.000396884	0.000124838	0.134186	0.321564	0.303099	-1.83259e-11
2619.05	-2.48116	0.0453087	-0.023303	0.338479	0.00107108	-0.000252481	0.0413942	0.339958	0.402932	-5.80987e-12
2630.49	-2.78005	-0.0359507	0.0128029	-0.0517966	-0.00123787	0.000281163	-0.167949	-0.0849351	0.268605	1.49079e-11
2641.94	-2.41528	-0.311335	-0.00740869	0.0184382	0.00111431	-0.000233066	0.0447644	0.0247716	0.265017	-3.4494e-11
2653.39	-3.10005	-0.407072	0.00458872	-0.0101924	-0.000930717	0.000142503	-0.00963974	0.00332031	0.353621	4.04961e-11
2664.84	-2.8889	-0.252725	-0.0327966	-0.00226399	0.000840401	-4.40003e-05	-0.00570818	-0.0174078	0.0821783	-2.28764e-11
2676.28	-1.84067	-0.254375	0.323012	0.00543217	-0.000873844	-3.61572e-05	0.0133915	0.0220792	-0.077365	1.62444e-11
2687.73	-2.38183	-0.36459	0.536505	-0.0119421	0.000936855	8.38942e-05	-0.0180531	-0.0220175	0.0525703	-6.65751e-12
2699.18	-1.0811	-0.0209426	0.311236	0.0105725	-0.000850869	-9.71664e-05	0.0206137	0.015493	-0.0302198	-6.10988e-12
2710.62	-0.980124	0.0501265	0.698892	-0.00870953	0.000428016	8.29098e-05	-0.0228813	-0.00929349	0.00780659	1.25668e-11
2722.07	-1.92794	-0.0457894	0.732693	0.00582268	0.000436584	-5.27064e-05	0.0284702	0.00321122	0.00495804	-1.98052e-11
2733.52	-1.0526	0.0361772	0.385453	-0.00211702	-0.00168048	1.85988e-05	-0.0310479	0.00221971	-0.0138557	1.22608e-11
2744.96	-1.44048	-0.0201257	0.951812	-0.0012584	0.0030258	9.97265e-06	0.0317271	-0.00585816	0.0151311	-2.45751e-12
2756.41	-1.42709	0.00836524	1.0617	0.00347366	-0.00399691	-2.76964e-05	-0.0211275	0.00712306	-0.0132375	4.39152e-12
2767.86	-1.14096	0.00288687	0.911922	-0.00422586	0.00402729	3.34634e-05	0.000782608	-0.00625847	0.00999078	2.65157e-12
2779.3	-1.57494	-0.00823263	1.19658	0.0037569	-0.00265735	-2.93975e-05	0.0586037	0.0040799	-0.00612473	-1.03796e-11
2790.75	-1.43761	0.0101804	0.629545	-0.00252046	-0.000227978	1.93857e-05	-0.441862	-0.00151584	0.00231891	8.76119e-12
2802.2	-0.893612	-0.00971102	0.777641	0.0010108	0.00421314	-7.61437e-06	-0.171389	-0.000671031	0.000998751	-4.85473e-13
2813.64	-1.19546	0.00728137	1.05502	0.00037253	-0.00826154	-2.53684e-06	-0.0147523	0.00204334	-0.00371857	-2.38728e-13
2825.09	-1.90505	-0.00379567	0.62379	-0.00138581	0.0110262	9.07863e-06	-0.572212	-0.00250557	0.00596994	3.07675e-12
2836.54	-1.04649	0.000322019	1.11439	0.0019296	-0.0114625	-1.14852e-05	-0.380511	0.00221855	-0.00779495	-6.91699e-12
2847.99	-0.590888	0.00226103	0.583881	-0.00200447	0.00939918	1.0391e-05	-0.194758	-0.0014772	0.00893176	2.36674e-12
2859.43	-0.560974	-0.0035518	0.749462	0.00166426	-0.00445218	-7.09407e-06	-0.431059	0.000596989	-0.00877278	-9.85354e-12
2870.88	0.0193835	0.00359203	0.498108	-0.00098663	-0.00726315	3.04506e-06	-0.430132	0.000167702	0.00672	-3.12374e-12
2882.33	-0.333971	-0.00273401	-0.843904	6.649e-05	0.0204845	5.50231e-07	-0.0950018	-0.000665907	-0.00265605	2.02967e-11
2893.77	-0.645928	0.00145712	0.650837	0.00097132	-0.037005	-2.95175e-06	-0.00201747	0.000855579	-0.00291156	-4.21122e-12
2905.22	-0.949164	-0.000202042	1.1654	-0.00195335	0.0544369	3.92783e-06	0.111355	-0.000781641	0.0100256	-1.03021e-11
2916.67	-1.02911	-0.000729796	1.15675	0.00265084	-0.0723195	-3.66156e-06	0.448266	0.000539653	-0.0205326	2.10305e-12
2928.11	-0.606591	0.00120768	1.7387	-0.00280178	0.0930653	2.58392e-06	0.043644	-0.000237855	0.0278932	-4.83281e-12
2939.56	-0.784624	-0.00125059	1.40388	0.0021714	0.456638	-1.19603e-06	-0.14143	-3.28129e-05	-0.0332683	2.41167e-12
2951.01	-0.534367	0.00097714	1.86477	-0.000649137	0.0543768	-7.33673e-08	0.521055	0.000215736	0.0319564	1.26667e-11
2962.45	-0.600822	-0.000547217	1.98844	-0.0016384	-0.0585644	9.50705e-07	0.140878	-0.000292304	-0.0185834	-8.55535e-12
2973.9	-0.904698	0.000111265	2.12143	0.00424382	0.0505261	-1.33826e-06	-0.091106	0.000275252	-0.0271092	4.90748e-12
2985.35	-0.586024	0.000223176	2.59149	-0.00641169	-0.0382168	1.28628e-06	0.538285	-0.000196325	0.426422	4.02155e-12
2996.79	-1.23114	-0.000404835	2.41642	0.00723127	0.0241981	-9.37044e-07	0.0298297	9.29515e-05	0.198161	-2.10278e-11
3008.24	-1.31452	0.0004346	2.80721	-0.00590782	-0.0117986	4.63054e-07	0.0791863	2.53396e-06	-0.0954873	1.22595e-11
3019.69	-0.868168	-0.000349983	1.59585	0.00221536	-0.000396955	-1.62949e-08	0.396875	-6.925e-05	0.0537781	9.2318e-12
3031.14	-1.15488	0.00020525	-0.201515	0.00325331	0.00657717	-3.02702e-07	0.248471	9.94648e-05	-0.0265188	-6.64826e-12
3042.58	-0.470338	-5.32983e-05	1.83153	-0.00935246	-0.0099484	4.54105e-07	0.38355	-9.65976e-05	0.00689306	-2.76079e-13
3054.03	-0.40572	-6.68133e-05	2.86303	0.0155495	0.0107617	-4.50494e-07	-0.0519283	7.10995e-05	0.00565397	-7.19886e-12
3065.48	-0.767496	0.000135274	1.83029	-0.022058	-0.00898558	3.38482e-07	0.254495	-3.58396e-05	-0.0141516	2.33513e-12
3076.92	-0.141843	-0.000150674	2.09908	0.0220971	0.00547571	-1.77251e-07	0.415373	2.26566e-06	0.0148813	-5.25103e-12
3088.37	-0.390733	0.000124913	1.23483	-0.0174036	-0.00153778	2.04516e-08	-0.169635	2.19601e-05	-0.0132697	3.19084e-12
3099.82	-0.6585	-7.63865e-05	0.802959	0.00329942	-0.00167653	9.51156e-08	0.0721687	-3.37063e-05	0.0097858	1.47011e-11
3111.26	-0.484658	2.36034e-05	0.819865	0.0248007	0.00355036	-1.53466e-07	0.0273636	3.37976e-05	-0.00495653	-1.55151e-11
3122.71	-0.537836	1.93533e-05	0.122118	-0.0849632	-0.00399403	1.57317e-07	-0.626103	-2.56481e-05	0.000110559	-7.4049e-12
3134.16	-0.976075	-4.49405e-05	0.542909	0.339977	0.00331797	-1.21798e-07	-0.509852	1.3668e-05	0.00349454	8.24294e-12
3145.6	-1.18453	5.20611e-05	-0.468205	0.32156	-0.00202699	6.71523e-08	0.00660164	-1.89814e-06	-0.00522243	7.61108e-12
3157.05	-0.701278	-4.443e-05	-0.21909	-0.0901045	0.000624967	-1.22813e-08	0.0527483	-6.86272e-06	0.00515612	3.88722e-12
3168.5	-0.973819	2.82519e-05	1.27656	0.0307113	0.000512046	-2.93832e-08	-0.0448578	1.13727e-05	-0.0038257	-7.24862e-12
3179.94	-0.877416	-9.97748e-06	0.467256	-0.00158219	-0.00118716	5.16022e-08	-0.275693	-1.17892e-05	0.00193813	-2.42007e-12
3191.39	-0.499772	-5.33508e-06	0.493222	-0.0140065	0.00137429	-5.47523e-08	-0.379057	9.21764e-06	-0.000132005	-5.01589e-12
3202.84	-1.03603	1.48351e-05	0.835891	0.0201955	-0.00117272	4.36745e-08	0.207978	-5.16398e-06	-0.00117091	2.69214e-12
3214.29	-1.2376	-1.7929e-05	1.22718	-0.0215025	0.000746089	-2.52255e-08	0.352841	1.05049e-06	0.00180297	4.69486e-12
3225.73	-1.37573	1.57548e-05	1.89933	0.0159716	-0.000264135	6.04909e-09	-0.265667	2.10543e-06	-0.00181051	1.51904e-12
3237.18	-1.64591	-1.03919e-05	2.09517	-0.0102821	-0.000139938	8.87151e-09	-0.225177	-3.81921e-06	0.00137585	3.73956e-12
3248.63	-1.67362	4.08353e-06	2.6642	0.00438888	0.000390965	-1.72261e-08	0.0461301	4.09963e-06	-0.000732736	-8.69471e-12
3260.07	-1.54166	1.3575e-06	2.85596	0.00113976	-0.000473026	1.89669e-08	0.242527	-3.30086e-06	9.58547e-05	3.23921e-12
3271.52	-1.44226	-4.86357e-06	3.30726	-0.00509924	0.000415946	-1.55773e-08	0.383901	1.93541e-06	0.000384084	7.75386e-12
3282.97	-1.4276	6.15314e-06	3.33473	0.00678485	-0.000274592	9.44708e-09	0.138019	-5.0228e-07	-0.000636813	-7.86321e-12
3294.41	-1.19838	-5.56642e-06	2.50471	-0.00630895	0.000108165	-2.80073e-09	-0.0134834	-6.30523e-07	0.000665159	-5.86775e-12
3305.86	-1.30577	3.8021e-06	2.88764	0.00439627	3.54884e-05	-2.59001e-09	0.283005	1.27606e-06	-0.000522801	7.68972e-12
3317.31	-1.40719	-1.63411e-06	3.3669	-0.00194283	-0.000128162	5.73114e-09	-0.131252	-1.42109e-06	0.000287055	5.35382e-12
3328.75	-1.13964	-2.93022e-07	3.26521	-0.000271461	0.000162361	-6.58616e-09	-0.00660644	1.17811e-06	-3.48868e-05	-6.04652e-12
3340.2	-0.955593	1.58056e-06	2.88693	0.00176152	-0.000147017	5.59028e-09	1.3821	-7.20349e-07	-0.000173138	6.3281e-12
3351.65	-0.984604	-2.10487e-06	1.6682	-0.00237563	0.000100465	-3.47232e-09	0.605017	2.22377e-07	0.000299884	1.65543e-12
3363.1	-0.787353	1.9637e-06	0.154799	0.00222707	-4.32235e-05	1.20201e-09	-0.298185	1.82706e-07	-0.000331473	-1.39074e-11
3374.54	-0.601981	-1.38557e-06	-1.3792	-0.00158101	-7.64569e-06	6.78525e-10	-0.153516	-4.23927e-07	0.000273108	-1.31873e-12
3385.99	-1.00694	6.39142e-07	-2.29373	0.000742617	4.1659e-05	-1.87982e-09	-0.444601	4.90995e-07	-0.000144002	3.58495e-12
3397.44	-0.561805	4.03049e-08	-2.00572	2.79703e-05	-5.55194e-05	2.23816e-09	-0.264136	-4.1904e-07	-2.66575e-05	-1.0568e-12
3408.88	-0.371837	-5.08813e-07	-1.59216	-0.000564244	5.17999e-05	-1.98653e-09	-0.421561	2.66431e-07	0.000202448	6.27612e-12
3420.33	-0.579425	7.16261e-07	-1.32464	0.000805431	-3.6588e-05	1.35691e-09	-0.309624	-9.39561e-08	-0.000342327	5.70784e-12
3431.78	-0.198636	-6.88551e-07	-0.549054	-0.000779998	1.69691e-05	-6.17421e-10	0.144259	-5.04017e-08	0.000404969	-2.43228e-12
3443.22	-0.900507	5.01895e-07	-0.462355	0.000572619	9.89253e-07	-6.23907e-11	-0.116692	1.39918e-07	-0.000356246	-5.79526e-12
3454.67	-0.575446	-2.47731e-07	-0.576878	-0.000287222	-1.34127e-05	5.125e-10	0.0891235	-1.69133e-07	0.000179842	1.13011e-12
3466.12	-0.317554	8.1275e-09	-0.0887136	1.61255e-05	1.89134e-05	-7.6266e-10	0.416615	1.48635e-07	0.000111074	5.34421e-12
3477.56	-1.45079	1.62383e-07	0.320397	0.000178993	-1.81955e-05	8.81664e-10	0.124993	-9.79128e-08	-0.000465206	-9.19354e-12
3489.01	-1.16667	-2.41451e-07	1.22072	-0.000273092	1.32678e-05	-8.19308e-10	0.287031	3.83997e-08	0.000792641	-1.16984e-12
3500.46	-0.989011	2.39698e-07	1.47961	0.000273073	-6.56822e-06	5.48135e-10	0.55121	1.28097e-08	-0.00097703	7.83878e-12
3511.9	-1.28094	-1.80863e-07	1.01732	-0.000206686	2.47034e-07	-2.08209e-10	0.217205	-4.58675e-08	0.000902208	-1.89944e-12
3523.35	-1.47197	9.57834e-08	1.36427	0.000109638	4.26961e-06	-9.39018e-11	-0.0394309	5.79893e-08	-0.000490488	-4.35449e-12
3534.8	-1.47001	-1.27353e-08	1.34127	-1.45576e-05	-6.41717e-06	3.95125e-10	0.0141051	-5.2519e-08	-0.000255446	-8.61161e-12
3546.25	-0.928536	-5.02534e-08	0.924174	-5.6028e-05	6.37258e-06	-6.77574e-10	-0.00768362	3.58778e-08	0.00121969	7.32331e-12
3557.69	-1.22495	8.15975e-08	0.81882	9.21845e-05	-4.79208e-06	9.21748e-10	-0.00022625	-1.53798e-08	-0.00216408	1.24343e-11
3569.14	-1.38117	-8.39977e-08	0.136816	-9.52753e-05	2.51274e-06	-9.67154e-10	0.00523106	-2.77294e-09	0.00275601	-6.76107e-12
3580.59	-1.08064	6.68717e-08	-0.0183785	7.4301e-05	-2.94827e-07	7.57241e-10	-0.0149645	1.49134e-08	-0.00264046	-6.68405e-12
3592.03	-1.36428	-3.6982e-08	-0.0186608	-4.14533e-05	-1.34117e-06	-3.38496e-10	0.0241925	-1.98663e-08	0.00155481	4.82751e-12
3603.48	-1.66448	5.95104e-09	-0.480147	8.21508e-06	2.16856e-06	-3.68499e-10	-0.0317131	1.86061e-08	0.000531386	4.07113e-12
3614.93	-1.66972	1.59918e-08	-0.0889664	1.72193e-05	-2.22456e-06	1.23807e-09	0.0372247	-1.31108e-08	-0.00329481	-7.12168e-12
3626.37	-1.57707	-2.70753e-08	0.0703487	-3.09697e-05	1.72379e-06	-2.09893e-09	-0.0354791	5.93676e-09	0.00602613	-5.02705e-13
3637.82	-1.65119	2.85158e-08	-0.0603158	3.31407e-05	-9.51758e-07	2.62059e-09	0.0226199	4.52617e-10	-0.00774345	2.14322e-12
3649.27	-1.6971	-2.37176e-08	0.0439382	-2.66163e-05	1.75823e-07	-2.34738e-09	0.0165227	-4.84623e-09	0.0074449	-4.65245e-12
3660.71	-1.6143	1.43778e-08	-0.0275179	1.55466e-05	4.13796e-07	1.26897e-09	-0.464558	6.79419e-09	-0.00459597	9.24623e-12
3672.16	-1.57033	-3.75463e-09	0.0136056	-3.96372e-06	-7.28798e-07	6.40823e-10	-0.141146	-6.47788e-09	-0.000515036	3.93237e-12
3683.61	-1.77039	-5.04479e-09	7.83558e-05	-5.16903e-06	7.74311e-07	-3.17714e-09	0.0849137	4.71977e-09	0.00691694	-1.87848e-12
3695.05	-1.75596	9.09153e-09	-0.00763436	1.03534e-05	-6.1807e-07	5.67245e-09	-0.0700737	-2.29055e-09	-0.0141599	-1.85401e-12
3706.5	-1.50028	-9.86644e-09	0.0121048	-1.14923e-05	3.57689e-07	-7.28743e-09	0.0731657	-5.06033e-12	0.0227952	-4.06889e-12
3717.95	-1.73119	8.54434e-09	-0.0131736	9.50105e-06	-8.71519e-08	7.06018e-09	-0.0734839	1.52839e-09	-0.0258367	5.81429e-12
3729.4	-1.67139	-5.29098e-09	0.0108417	-5.7884e-06	-1.2504e-07	-4.33567e-09	0.0572827	-2.27612e-09	0.0245514	-6.43981e-12
3740.84	-1.6777	1.63676e-09	-0.00635037	1.76521e-06	2.44154e-07	-1.04492e-09	0.25169	2.23145e-09	-0.0139538	9.27438e-12
3752.29	-1.64056	6.99852e-10	0.00145447	1.50242e-06	-2.68414e-07	8.37138e-09	0.443003	-1.65413e-09	-0.011254	7.42643e-13
3763.74	-0.932864	-1.96493e-09	0.0023647	-3.44135e-06	2.20398e-07	-1.58562e-08	-0.199485	9.89852e-10	0.0711558	-1.7002e-11
3775.18	-1.12801	3.95055e-09	-0.00435319	3.97188e-06	-1.33558e-07	2.09802e-08	-0.924352	-1.80374e-10	-0.37501	1.08366e-11
3786.63	-1.43503	-4.17134e-09	0.00446784	-3.38098e-06	3.96552e-08	-2.09263e-08	-0.237712	-5.33606e-10	-0.280404	-4.50811e-13
3798.08	-1.28032	2.91241e-09	-0.00320416	2.14219e-06	3.64644e-08	1.37153e-08	-0.293159	8.53966e-10	0.0942802	-9.00392e-12
3809.52	-1.44239	-1.37463e-09	0.00132562	-7.48551e-07	-8.12301e-08	1.19322e-09	-0.23038	-8.55343e-10	-0.0388847	-4.8731e-13
3820.97	-1.28636	-1.2929e-09	0.000400493	-4.17155e-07	9.30157e-08	-2.19537e-08	0.154285	6.46607e-10	0.0100544	1.3645e-11
3832.42	-1.41711	2.19503e-09	-0.00139853	1.13738e-06	-7.8644e-08	4.3789e-08	0.205909	-2.92245e-10	0.00589017	5.66885e-12
3843.86	-1.67004	-1.23926e-09	0.00139818	-1.36707e-06	4.92328e-08	-5.97138e-08	0.687231	2.4392e-11	-0.012392	-1.27901e-11
3855.31	-1.2525	1.06684e-09	-0.000471968	1.19878e-06	-1.67612e-08	6.17759e-08	0.481808	1.70656e-10	0.0142297	4.22017e-12
3866.76	-1.11815	-7.59849e-10	-0.000994386	-7.8926e-07	-1.01059e-08	-4.33209e-08	0.43917	-3.60419e-10	-0.00978327	-3.18163e-13
3878.21	-1.14971	-2.89113e-11	0.00239488	3.06848e-07	2.64291e-08	2.17424e-09	0.551652	3.04404e-10	0.00619029	-6.21303e-12
3889.65	-1.15074	1.27555e-10	-0.00305843	1.07905e-07	-3.18409e-08	5.68625e-08	0.271446	-2.04136e-10	-0.00396082	9.77834e-12
3901.1	-1.43681	-6.37386e-10	0.00245796	-3.72571e-07	2.81912e-08	-1.20955e-07	0.572887	7.28438e-11	0.00324453	7.96242e-13
3912.55	-1.25783	5.28336e-10	-0.000427164	4.69093e-07	-1.84826e-08	1.70134e-07	0.614538	7.37072e-11	-0.00434568	-1.75215e-11
3923.99	-1.16866	-2.51517e-10	-0.00269115	-4.23927e-07	6.93979e-09	-1.8129e-07	0.335164	-4.01527e-11	0.0075618	8.5594e-12
3935.44	-1.54537	3.65339e-11	0.00598331	2.88326e-07	2.80922e-09	1.34689e-07	0.07542	7.42881e-11	-0.0131383	9.27343e-12
3946.89	-1.27823	-4.35444e-10	-0.0082823	-1.22904e-07	-8.92001e-09	-2.21294e-08	-0.056553	-1.42137e-10	0.0169895	-2.16518e-11
3958.33	-1.33295	4.92651e-10	0.00877415	-2.31746e-08	1.08825e-08	-1.45176e-07	0.0317221	5.15001e-11	-0.0153907	8.56394e-12
3969.78	-1.41845	8.04604e-10	-0.00756766	1.20873e-07	-9.58508e-09	3.32363e-07	-0.0167406	-1.73784e-11	0.00504313	1.00407e-11
3981.23	-0.878691	-1.68679e-09	0.00453715	-1.61043e-07	6.78217e-09	-4.83193e-07	0.00282967	-8.5687e-12	0.0213555	-9.99751e-12
3992.67	-1.20598	3.22898e-10	0.00444478	1.50231e-07	-3.0378e-09	5.30594e-07	-0.0050249	1.9423e-11	-0.0769282	1.12891e-11
4004.12	-1.24983	1.66403e-09	-0.0146798	-1.04981e-07	-8.17428e-10	-4.15019e-07	0.00123765	-5.98796e-12	0.228083	-6.38593e-12
4015.57	-1.08573	-4.89305e-10	0.0288754	4.77363e-08	3.14195e-09	1.08019e-07	-0.00905674	7.86556e-11	0.0451892	-4.92843e-12
4027.01	-0.865261	6.52394e-10	-0.0462409	3.71472e-09	-3.55065e-09	3.64612e-07	0.0164182	-7.04123e-11	-0.286505	1.32452e-11
4038.46	-0.417283	-6.52819e-10	0.0687923	-3.92191e-08	3.05285e-09	-9.09094e-07	-0.0236448	5.6941e-11	0.0885105	-4.71882e-12
4049.91	-0.888211	-1.2141e-09	-0.106602	5.48894e-08	-2.30105e-09	1.36794e-06	0.0254729	-2.89034e-11	-0.00508007	-8.39717e-13
4061.36	-0.928942	2.27874e-09	-0.454332	-5.29745e-08	1.28172e-09	-1.54722e-06	0.611832	-9.55287e-11	-0.0771746	-2.94823e-12
4072.8	-0.543085	5.04207e-11	-0.0451135	3.78413e-08	-7.0878e-12	1.26818e-06	0.697442	1.10882e-10	0.410127	6.12064e-12
4084.25	-0.396187	-1.42829e-09	0.0700191	-1.81456e-08	-7.72053e-10	-4.35381e-07	0.281329	-9.46094e-11	0.245202	8.99365e-12
4095.7	-0.458779	8.12044e-10	-0.0742127	-2.86816e-10	1.14717e-09	-8.95667e-07	0.0259789	-1.18263e-12	-0.0921489	-8.83028e-12
4107.14	-0.962564	1.61786e-10	0.0657693	1.33488e-08	-1.22852e-09	2.47448e-06	-0.0634238	1.15437e-10	0.0541317	4.1668e-12
4118.59	-0.907203	-3.94969e-10	-0.0451716	-1.87921e-08	7.85707e-10	-3.86067e-06	0.0733065	-8.30387e-11	-0.0323835	-4.22395e-12
4130.04	-0.562784	-3.76574e-10	0.0159118	1.77149e-08	-3.9858e-10	4.49586e-06	-0.0478284	2.63511e-11	0.01278	-2.90286e-12
4141.48	-0.586345	-1.21226e-09	0.0194658	-1.24256e-08	2.06653e-10	-3.84706e-06	-0.239477	2.31882e-11	0.00635992	-1.88378e-12
4152.93	-0.469113	-6.62178e-11	-0.0485888	6.64906e-09	1.85828e-10	1.60118e-06	-0.520821	4.79395e-12	-0.0357971	-6.65843e-12
4164.38	-0.530775	1.42008e-09	0.0738497	-4.81696e-10	-2.37184e-10	2.13558e-06	-0.309084	5.24233e-13	0.0895881	6.04287e-12
4175.82	-0.625072	3.55825e-10	-0.0947937	-4.24247e-09	2.0135e-10	-6.69869e-06	0.0495779	-6.69812e-11	-0.493171	-1.27748e-11
4187.27	-0.610303	-5.83461e-10	0.092013	6.35616e-09	-4.96068e-10	1.0861e-05	-0.47895	5.05486e-11	-0.133558	9.13652e-12
4198.72	-0.719102	-3.02532e-10	-0.0581714	-5.92676e-09	4.11109e-10	-1.30204e-05	-0.0918573	-8.09646e-11	0.571061	4.79688e-12
4210.16	-0.539756	-5.65515e-10	-0.00452278	3.88881e-09	-3.25324e-10	1.15951e-05	-0.0929545	6.69854e-11	-0.00502576	-1.57973e-11
4221.61	-0.69519	2.78666e-10	0.0291005	-1.95359e-09	6.53112e-11	-5.57769e-06	-0.496219	1.29083e-10	-0.01203	2.17354e-11
4233.06	-0.821275	8.14096e-10	-0.562285	2.13769e-11	3.19352e-10	-4.878e-06	0.0849393	-1.26763e-10	0.0267988	5.06175e-12
4244.51	-0.577497	-9.86777e-10	1.18736	1.1704e-09	-1.09249e-10	1.8024e-05	-0.0401932	3.53117e-11	-0.0396038	-1.50083e-11
4255.95	-0.885399	5.54656e-10	0.666786	-1.75302e-09	4.19155e-10	-3.04543e-05	0.0495606	-3.57901e-11	0.058296	-6.60082e-12
4267.4	-0.922026	1.54848e-09	-1.65378	1.61664e-09	-6.8177e-10	3.7586e-05	-0.142681	4.24403e-11	-0.085471	5.47205e-12
4278.85	-0.81366	-1.85358e-09	-0.278755	-1.0168e-09	-9.08903e-13	-3.4746e-05	-0.481388	3.26303e-11	0.132606	3.73536e-12
4290.29	-0.915649	1.07394e-10	0.19106	5.59271e-10	3.85454e-10	1.87439e-05	0.0738715	-1.39059e-10	-0.329094	-1.07844e-11
4301.74	-0.863545	5.47493e-10	-0.164154	-1.20223e-10	-3.8317e-10	1.04087e-05	-0.0371324	1.32116e-10	-0.35131	1.39353e-11
4313.19	-0.728591	-2.17413e-10	0.134286	-2.41656e-10	1.17001e-10	-4.81639e-05	0.127944	-3.66057e-11	0.105339	1.31431e-12
4324.63	-0.173602	8.54789e-10	-0.0980625	8.94402e-10	-1.68606e-10	8.51083e-05	0.64725	-7.15775e-11	-0.108291	-7.33961e-12
4336.08	-0.493797	-1.59705e-09	0.0524736	-4.95153e-10	5.31295e-11	-0.00010817	0.324385	9.63616e-11	0.383797	6.94963e-12
4347.53	-1.1208	1.053e-09	-0.00802012	-6.4607e-10	1.63018e-10	0.000103591	0.409003	-8.30583e-11	0.288877	-1.62868e-11
4358.97	-0.319305	5.56471e-10	-0.0189378	7.69496e-10	9.96868e-11	-6.13838e-05	0.735713	-2.33525e-11	-0.112298	7.79574e-12
4370.42	-0.32451	-1.50268e-09	0.0389477	2.96984e-10	2.15177e-10	-1.96462e-05	0.452268	4.30993e-11	0.0665424	1.28918e-11
4381.87	-0.759964	1.0443e-09	-0.0483723	-1.08785e-09	-3.08878e-10	0.000127792	0.393177	9.09546e-12	-0.0409035	-1.07788e-11
4393.31	-0.252732	-1.96617e-10	0.0439982	-1.81767e-10	6.48254e-11	-0.000237074	0.158874	-5.27805e-11	0.0317548	2.44006e-12
4404.76	-0.321209	-6.97004e-10	-0.0234766	6.22535e-10	1.06227e-10	0.000310239	-0.00177475	-3.11266e-12	-0.0352816	-1.4001e-12
4416.21	-0.0648179	3.15241e-10	-0.00363484	5.54305e-10	-1.39729e-10	-0.000306969	-0.241066	1.03759e-10	0.0497837	-5.72034e-12
4427.66	0.121648	2.16897e-10	0.034814	-3.14457e-10	1.80143e-10	0.000196599	-0.749702	-6.72833e-11	-0.0881348	3.36938e-12
4439.1	-0.133215	-6.83431e-10	-0.0657109	6.40253e-11	-3.34441e-10	2.72606e-05	-0.127095	2.36436e-11	-0.469424	2.43538e-12
4450.55	0.142378	7.16427e-11	0.0973642	-4.6439e-10	-2.48245e-10	-0.00033464	-0.346426	4.46208e-11	-0.0389123	-9.46805e-12
4462	-0.166146	8.30761e-10	-0.147019	-8.64981e-11	4.94768e-10	0.000654918	-0.885602	-9.07471e-11	0.0724324	1.60245e-13
4473.44	-0.437731	-7.12806e-10	-0.440329	6.68531e-10	-9.84301e-11	-0.000884661	-0.265832	6.2337e-12	-0.0869006	1.64138e-11
4484.89	-0.00700989	-4.31796e-10	-0.0233653	-8.00823e-10	-9.05449e-11	0.000909055	-0.536915	4.94592e-11	0.0877025	5.52006e-12
4496.34	0.0223732	2.74507e-10	0.0432873	7.44817e-10	3.03346e-10	-0.000634164	-0.536056	9.91926e-11	-0.0724664	-6.1949e-12
4507.78	-0.00967726	8.43865e-10	-0.0414214	-1.50785e-10	-1.50931e-10	2.37431e-05	-0.387044	-8.65182e-11	0.0274827	-1.26765e-11
4519.23	0.00467988	3.17005e-10	0.0330685	-6.21087e-10	-1.86428e-10	0.000864904	-0.566878	-3.92454e-11	0.434251	-9.95679e-13
4530.68	0.0145778	-7.7777e-10	-0.0221837	5.22387e-10	1.30826e-10	-0.00185114	-0.260127	9.91953e-11	0.152516	9.88621e-12
4542.12	-0.0447059	3.72694e-10	0.0123584	-6.18872e-10	8.91359e-11	0.00261976	-0.40751	-1.1312e-10	-0.0758261	-1.33577e-12
4553.57	-0.626803	3.75909e-10	-0.00184188	8.95315e-10	-1.97239e-10	-0.00276357	-0.0711339	-3.61434e-11	0.0365055	1.12507e-11
4565.02	-0.98738	-8.18744e-10	-0.00363256	1.02902e-09	3.39362e-10	0.00190987	0.0647353	7.16385e-11	-0.0106196	-4.51036e-12
4576.47	-1.01824	1.03784e-10	0.0069716	-1.24115e-10	1.03312e-10	0.000110059	-0.0602207	2.40761e-11	-0.00520604	-1.07776e-11
4587.91	-1.01793	6.08662e-10	-0.00842567	-1.757e-09	-4.62642e-10	-0.00291497	0.0765162	2.57501e-12	0.0113547	8.68398e-12
4599.36	-0.826598	-3.76423e-10	0.00771395	-2.83847e-10	5.69802e-11	0.00536015	-0.12413	8.85577e-13	-0.0122385	-9.74821e-12
4610.8	-0.974407	-4.6321e-11	-0.00530882	8.36399e-10	-2.2284e-10	-0.0058598	0.322446	-4.15254e-11	0.00449858	7.03145e-12
4622.25	-1.42446	-3.46879e-10	0.00220689	-9.31436e-10	2.52167e-10	0.00426891	0.294884	-5.08153e-11	0.00886692	9.33507e-12
4633.7	-1.66983	-3.91245e-10	0.000582738	1.38417e-09	3.32342e-10	-0.00424803	0.157163	5.15188e-11	-0.021092	-4.99789e-12
4645.14	-1.45392	9.58729e-10	-0.00242973	-7.76711e-11	-4.06062e-10	0.0023449	0.411792	-3.41816e-12	0.0333456	5.33732e-12
4656.6	-1.26358	1.90022e-10	0.00313187	-5.43814e-10	1.50534e-11	-0.00337321	-0.0123613	1.44719e-11	-0.0406226	-6.25506e-12
4668.04	-1.45191	-5.97561e-10	-0.0028489	1.18744e-09	-1.242e-12	0.00601179	-0.0763811	1.78721e-11	0.0374439	-4.56882e-12
4679.49	-0.863871	-2.21175e-10	0.0019481	-1.14121e-09	1.29465e-10	-0.00765678	0.125397	-7.8843e-11	-0.00599354	-2.11352e-13
4690.93	-0.441697	1.16468e-09	-0.000839135	-7.30759e-10	1.37925e-10	-0.00488285	-0.150364	6.68259e-11	-0.440025	-1.64899e-12
4702.38	-0.677409	7.93249e-11	-0.000143848	8.47294e-10	-1.37482e-10	0.419183	-0.406871	5.50075e-11	-0.157904	3.85821e-12
4713.84	-0.217346	-1.13981e-09	0.000799774	4.35722e-10	-3.69751e-10	0.223629	-0.0895107	-1.03293e-10	0.0899055	4.26116e-12
4725.26	0.136458	1.06052e-09	-0.00106721	-1.2764e-09	8.76976e-11	-0.208817	0.101686	-3.97715e-12	-0.0560359	-1.75992e-12
4736.73	0.174053	-5.08015e-11	0.000996578	6.13222e-10	5.25901e-10	0.226706	-0.368349	1.09482e-10	0.0311356	-6.61978e-12
4748.16	0.55838	-8.02751e-10	-0.000704833	1.17292e-09	-4.39053e-10	-0.241096	-0.709359	-1.13279e-11	-0.0116954	4.0752e-12
4759.62	0.644334	7.6579e-11	0.000327858	-4.86522e-10	-9.90337e-11	-0.252507	-0.368768	-9.4754e-11	-0.00162602	-7.63419e-13
4771.07	0.311645	-8.88702e-11	1.77397e-05	4.12155e-10	5.04619e-11	0.274254	-0.470205	1.93216e-11	0.0114545	-4.88912e-12
4782.49	0.332726	2.94732e-10	-0.000257144	-1.4418e-09	1.23687e-10	-0.343642	-0.652582	4.45095e-11	-0.0135942	9.20254e-12
4793.99	0.133099	-7.7291e-10	0.000363253	3.11578e-10	5.07397e-10	0.180383	-0.406	3.18011e-11	0.0130339	-5.66784e-12
4805.37	-0.101896	-2.72221e-11	-0.000349335	9.16865e-10	-5.55177e-10	0.401864	-0.911373	-4.66367e-11	-0.0103569	-1.71834e-11
4816.88	0.0639135	1.46073e-09	0.000254017	-8.53312e-10	5.61311e-11	-0.213246	-0.790892	-2.27496e-11	0.00602841	-6.64726e-13
4828.29	-0.0363474	-3.8243e-11	-0.000124495	5.54576e-10	2.96437e-10	0.0827152	-0.524126	1.67689e-11	-0.00130742	1.78797e-11
4839.72	0.003022	-6.94394e-10	2.577e-06	-8.61085e-10	-2.64326e-10	0.0613207	-0.65415	-7.40856e-11	-0.00249755	1.20181e-11
4851.25	0.0397234	-1.99472e-11	8.39164e-05	-1.44549e-10	1.0384e-10	-0.301235	-0.360696	1.2446e-10	0.00460327	-1.65192e-11
4862.55	-0.418632	5.77438e-10	-0.000123863	1.02188e-09	-2.34573e-10	0.0154131	-0.27886	-2.0691e-11	-0.00492846	8.39239e-12
4874.19	-0.26571	9.59267e-10	0.000120705	4.6063e-11	2.44231e-10	0.23585	0.115404	-1.60541e-10	0.00388314	1.88484e-11
4885.43	0.421104	-5.60367e-10	-8.73744e-05	-3.27621e-10	1.45928e-10	0.0061357	-0.112171	9.36391e-11	-0.00212158	-2.20776e-11
4897.04	0.276805	-1.60047e-09	4.05697e-05	-4.68736e-10	-5.28659e-10	-0.0657558	-0.480742	8.79134e-11	0.000302523	9.69768e-12
4908.49	-0.0657579	9.02258e-10	3.78918e-06	-3.15855e-10	2.51545e-10	0.0538908	0.0123797	-2.09907e-11	0.0010651	-7.57516e-12
4919.75	0.0193747	7.93787e-10	-3.44527e-05	6.49223e-10	-1.43869e-10	0.0321844	0.0261524	-3.46401e-11	-0.0017343	-9.52381e-12
4931.79	0.00273022	-1.60021e-09	4.5489e-05	1.70579e-09	-2.90991e-10	-0.350093	-0.0392374	4.14031e-11	0.00163966	4.26027e-11
4942.33	-0.0119995	2.7702e-09	-3.6004e-05	-5.60481e-09	2.76807e-09	0.0626788	0.0458101	-5.27488e-10	-0.00091656	-1.77388e-10
