# Supplementary material for: How spatial release from masking may fail to function in a highly directional auditory system
Source: eLife. 2017 Apr 25;6:e20731. doi: 10.7554/eLife.20731 (PMC5443663; doi:10.7554/eLife.20731)
Supplement: Figure 2—source data 3. — ‘X’ and ‘Y’ coordinates of virtual walking paths measured from the treadmill system. Data plotted in Figure 2C. DOI: http://dx.doi.org/10.7554/eLife.20731.006 [file elife-20731-fig2-data3.xlsx]

## Sheet: x_noise_alone_vpath
Time	Fly1	Fly2	Fly3	Fly4	Fly5	Fly6	Fly7	Fly8	Fly9	Fly10	Fly11	Fly12	Fly13			AVG	SEM
45.3115	2.03213e-07	-6.52093e-08	-0.00148959	-6.12818e-08		-1.10552e-08				-4.5168e-06	3.79345e-07	-1.06315e-06	-0.00260158			-0.000455145	0.000314526
90.0913	-4.41816e-07	1.88194e-08	-0.00160301	2.64991e-08		2.4103e-08				1.13228e-05	-7.7092e-07	2.31555e-06	-0.00205142			-0.000404659	0.000271425
137.243	9.32738e-07	2.23073e-07	-0.000706043	1.72065e-07		-5.10356e-08				-2.74211e-05	1.5034e-06	-4.89697e-06	-0.0019082			-0.000293753	0.000216149
182.819	-1.90999e-06	-1.0335e-06	-0.00174863	-8.53112e-07		1.04842e-07				6.52601e-05	-2.97982e-06	1.00482e-05	-0.00168748			-0.000374164	0.000254124
229.371	3.78666e-06	3.34859e-06	-0.00113073	2.82334e-06		-2.08313e-07				-0.000131565	5.31692e-06	-1.99704e-05	-0.00208674			-0.00037266	0.000247233
275.574	-7.19014e-06	-9.49408e-06	-0.00643061	-8.05985e-06		3.97763e-07				0.000277566	-3.17085e-06	3.79484e-05	-0.00175136			-0.000877107	0.000722407
321.85	1.28283e-05	2.46684e-05	-0.0130871	2.1028e-05		-7.22521e-07				-0.00121984	2.71084e-05	-6.80403e-05	-0.000870829			-0.00168454	0.00143365
368.327	-2.26075e-05	-5.82299e-05	-0.0234767	-5.1048e-05		1.22674e-06				0.000159989	-0.000164384	0.000123144	-0.00125188			-0.00274894	0.00259483
414.443	3.52004e-05	0.000147504	-0.0401436	0.000126521		-1.8175e-06				0.0023696	-0.00126338	-0.000179451	-0.00158657			-0.00449956	0.00447073
460.94	1.16198e-05	-0.000393389	-0.0583298	-0.000303064		1.98115e-06				0.000714273	-0.00141694	-0.000114453	-0.00215914			-0.00688766	0.00643649
507.133	7.73037e-05	0.000226601	-0.0780529	0.000388344		-1.69788e-06				-0.00382095	-0.00148304	-0.00110447	-0.00211636			-0.00954302	0.00857592
553.513	-0.00143516	-0.000848312	-0.0929421	-0.00145575		-7.60306e-06				-0.00894244	0.000402547	0.00732407	0.00390145			-0.0104448	0.0104152
599.821	-0.0106569	0.0262113	-0.0938003	0.0118978		8.6438e-05				-0.00541055	0.0340809	0.0821517	0.0454247			0.00999835	0.0161779
646.114	-0.00110182	0.0824743	-0.0884377	0.0407604		9.39801e-05				-0.0136538	0.0787648	0.149353	0.0936531			0.0379896	0.0237944
692.472	0.0228367	0.106909	-0.0808559	0.0753225		-0.000872892				-0.0286762	0.102252	0.174826	0.116648			0.0542655	0.0271593
738.749	0.0513296	0.0991975	-0.0678663	0.0960281		-0.0144217				-0.0645033	0.116138	0.167053	0.10984			0.054755	0.0281729
785.099	0.0990012	0.0825279	-0.0572061	0.104599		-0.030302				-0.10833	0.127735	0.118582	0.0775379			0.0460161	0.0290622
831.397	0.139206	0.066724	-0.0552659	0.117546		-0.039446				-0.148237	0.126317	0.04529	0.0311843			0.0314799	0.0321224
877.722	0.188921	0.0590011	-0.0594899	0.132731		-0.0591667				-0.176427	0.131104	-0.0397183	-0.0196461			0.0174788	0.0393274
924.041	0.237653	0.0683518	-0.0654896	0.155146		-0.0616007				-0.187204	0.141577	-0.0802127	-0.054869			0.0170391	0.0464318
970.352	0.286031	0.0852793	-0.0663087	0.193783		-0.0566708				-0.198068	0.166016	-0.0804305	-0.0629338			0.0296331	0.0531724
1016.68	0.333169	0.0996867	-0.0631053	0.234203		-0.0520826				-0.208717	0.180845	-0.0827103	-0.0590015			0.0424764	0.0592589
1062.99	0.373017	0.113039	-0.0594126	0.257325		-0.0427734				-0.216267	0.183138	-0.0917596	-0.0500289			0.0518087	0.0635273
1109.31	0.401858	0.121915	-0.0537049	0.28816		-0.0384305				-0.220275	0.192635	-0.094614	-0.0343084			0.0625816	0.0671089
1155.63	0.430091	0.120787	-0.0518362	0.327757		-0.0464301				-0.216312	0.199495	-0.10202	-0.0145803			0.0718836	0.0709597
1201.95	0.452649	0.118349	-0.0524641	0.381635		-0.0554578				-0.211015	0.205969	-0.106654	-0.00689356			0.0806797	0.0754764
1248.26	0.478739	0.132094	-0.0477354	0.439431		-0.0550239				-0.212558	0.210692	-0.111907	-0.0200503			0.0904091	0.0811359
1294.58	0.501002	0.150204	-0.0468793	0.503927		-0.050768				-0.215293	0.212337	-0.117138	-0.0317182			0.10063	0.0871867
1340.9	0.520587	0.168513	-0.0560677	0.562005		-0.0557497				-0.21485	0.214953	-0.121695	-0.0310767			0.109624	0.0929077
1387.22	0.542656	0.1802	-0.0655233	0.612238		-0.0563384				-0.215262	0.210652	-0.127717	-0.0310862			0.116646	0.0982331
1433.53	0.565136	0.182288	-0.0618343	0.651153		-0.0519388				-0.21373	0.204009	-0.130679	-0.0310122			0.12371	0.102112
1479.85	0.58539	0.180634	-0.0666152	0.691554		-0.0383375				-0.212936	0.2034	-0.129775	-0.0309847			0.13137	0.105978
1526.17	0.610138	0.176353	-0.0917449	0.741161		-0.0366258				-0.215137	0.20341	-0.132562	-0.031058			0.135993	0.11194
1572.49	0.63683	0.175672	-0.105686	0.794963		-0.0461829				-0.21874	0.203448	-0.14582	-0.0309923			0.140388	0.118776
1618.8	0.664482	0.175738	-0.10349	0.859114		-0.0566177				-0.221804	0.203393	-0.155358	-0.0312817			0.148242	0.125958
1665.12	0.691805	0.175725	-0.0893824	0.934962		-0.0555237				-0.226614	0.203429	-0.154692	-0.029711			0.161111	0.133262
1711.44	0.724671	0.175746	-0.0792519	0.996477		-0.0560611				-0.231272	0.203728	-0.160162	-0.0186912			0.172798	0.139974
1757.76	0.755945	0.175741	-0.0891288	1.06176		-0.0556187				-0.231614	0.211031	-0.16658	-0.00127411			0.184474	0.147213
1804.08	0.775027	0.175726	-0.109067	1.12379		-0.0565652				-0.231558	0.219104	-0.167465	0.0167662			0.193973	0.153698
1850.39	0.786785	0.175777	-0.138934	1.17316		-0.0564465				-0.231592	0.224015	-0.167166	0.0269941			0.199176	0.159171
1896.71	0.801189	0.175664	-0.168963	1.1846		-0.061342				-0.231373	0.22597	-0.169669	0.0373606			0.199271	0.161836
1943.03	0.809493	0.175916	-0.188834	1.17862		-0.0620674				-0.233083	0.224427	-0.185302	0.0485065			0.196409	0.162834
1989.35	0.810154	0.174994	-0.210984	1.17077		-0.0617553				-0.237694	0.223188	-0.202855	0.0605438			0.191818	0.163553
2035.66	0.805406	0.175202	-0.224093	1.17216		-0.0618927				-0.246761	0.222162	-0.217835	0.0544815			0.186537	0.164777
2081.98	0.808548	0.175759	-0.236065	1.1996		-0.0614426				-0.247565	0.221136	-0.223108	0.0459345			0.186977	0.167937
2128.3	0.818304	0.175699	-0.230825	1.26135		-0.06227				-0.246324	0.220737	-0.226548	0.0482781			0.195378	0.173532
2174.62	0.832998	0.174737	-0.221752	1.33738		-0.0609775				-0.252545	0.220834	-0.229998	0.0480613			0.205415	0.180812
2220.94	0.840385	0.175454	-0.218233	1.41582		-0.0605793				-0.259496	0.220797	-0.229413	0.0461857			0.214547	0.188173
2267.25	0.833737	0.174984	-0.213152	1.48465		-0.0567513				-0.262599	0.220818	-0.22923	0.0473254			0.222198	0.19389
2313.57	0.826457	0.174665	-0.203245	1.54034		-0.05673				-0.25812	0.220809	-0.23132	0.0610314			0.230432	0.198097
2359.89	0.826184	0.175441	-0.196599	1.58188		-0.055992				-0.255823	0.220811	-0.23604	0.0722671			0.236904	0.201644
2406.21	0.826292	0.175308	-0.189099	1.62962		-0.0557575				-0.261197	0.220815	-0.235551	0.0747511			0.242798	0.206005
2452.52	0.813257	0.175335	-0.180738	1.68312		-0.0558546				-0.272524	0.220802	-0.236164	0.0729211			0.246684	0.210728
2498.84	0.781559	0.174848	-0.166127	1.70925		-0.0558023				-0.281173	0.220833	-0.248388	0.0684606			0.244829	0.212407
2545.16	0.751517	0.174606	-0.151293	1.71412		-0.0558346				-0.285178	0.220777	-0.260524	0.0680333			0.241803	0.211996
2591.48	0.736617	0.175323	-0.145821	1.70279		-0.0558172				-0.282853	0.220904	-0.264618	0.0692085			0.239525	0.210306
2637.8	0.766039	0.175204	-0.148144	1.69869		-0.0558261				-0.280842	0.22033	-0.269721	0.070867			0.241844	0.211046
2684.11	0.784471	0.177617	-0.15724	1.73008		-0.0558217				-0.283376	0.219464	-0.282704	0.0674271			0.244436	0.215483
2730.43	0.778085	0.180968	-0.166674	1.78797		-0.0558238				-0.287839	0.219624	-0.285746	0.0728423			0.249268	0.221257
2776.75	0.756948	0.179636	-0.17374	1.85159		-0.0558228				-0.295774	0.21951	-0.285203	0.087499			0.253849	0.227047
2823.07	0.746029	0.179993	-0.176198	1.9019		-0.0558233				-0.302293	0.21962	-0.285455	0.103224			0.258999	0.231791
2869.38	0.74682	0.18	-0.180758	1.93305		-0.0558231				-0.299094	0.219384	-0.285193	0.11793			0.264035	0.234758
2915.7	0.75848	0.181888	-0.182134	1.96485		-0.0558231				-0.290907	0.221515	-0.285444	0.124223			0.270738	0.237937
2962.02	0.774264	0.180301	-0.188005	1.99265		-0.0558231				-0.291946	0.226174	-0.285014	0.121284			0.274877	0.241334
3008.34	0.780974	0.179785	-0.2091	2.02454		-0.0558231				-0.298027	0.231168	-0.286654	0.117724			0.276065	0.245521
3054.65	0.783426	0.179912	-0.239753	2.07086		-0.0558231				-0.306048	0.231354	-0.291824	0.117915			0.276669	0.251455
3100.97	0.757322	0.179847	-0.271718	2.11079		-0.0558231				-0.313499	0.229729	-0.291392	0.117789			0.273672	0.255876
3147.29	0.733328	0.179889	-0.292443	2.11538		-0.0558231				-0.31637	0.231777	-0.291605	0.117869			0.269112	0.256433
3193.61	0.731078	0.179867	-0.292547	2.10119		-0.0558231				-0.314515	0.233214	-0.291497	0.117852			0.267647	0.254896
3239.93	0.734427	0.179878	-0.299031	2.09762		-0.0558231				-0.314747	0.231087	-0.291526	0.117784			0.26663	0.254837
3286.24	0.748074	0.179873	-0.329591	2.11687		-0.0558231				-0.317191	0.229457	-0.29152	0.117852			0.266444	0.258146
3332.56	0.758882	0.179875	-0.372423	2.13965		-0.0558231				-0.320223	0.229516	-0.29152	0.117921			0.265095	0.262197
3378.88	0.752674	0.179874	-0.415051	2.16485		-0.0558231				-0.326051	0.229467	-0.291522	0.126157			0.262731	0.266131
3425.2	0.752491	0.179875	-0.417874	2.18771		-0.0558231				-0.327363	0.229512	-0.291519	0.136528			0.265949	0.268466
3471.51	0.736347	0.179874	-0.389712	2.20657		-0.0558231				-0.322316	0.229476	-0.291523	0.148438			0.271259	0.268738
3517.83	0.720998	0.179875	-0.382123	2.22761		-0.0558231				-0.326648	0.229519	-0.291517	0.159193			0.273453	0.270295
3564.15	0.711944	0.179874	-0.393027	2.25189		-0.0558231				-0.329777	0.229431	-0.291527	0.162755			0.273971	0.272976
3610.47	0.71623	0.179875	-0.407718	2.27527		-0.0558231				-0.330078	0.22977	-0.291513	0.14902			0.273892	0.276016
3656.78	0.736198	0.179875	-0.409383	2.30226		-0.0558231				-0.330935	0.230787	-0.291524	0.141625			0.27812	0.279313
3703.11	0.751841	0.179875	-0.408577	2.33185		-0.0558231				-0.33045	0.230711	-0.291556	0.151933			0.284423	0.28254
3749.42	0.767699	0.179875	-0.407424	2.36891		-0.0558231				-0.330927	0.230627	-0.2915	0.151685			0.290347	0.286612
3795.74	0.782489	0.179875	-0.407721	2.41022		-0.0558231				-0.334828	0.230336	-0.291467	0.152138			0.296135	0.291241
3842.06	0.797513	0.179875	-0.407115	2.45352		-0.0558231				-0.331642	0.234623	-0.285958	0.151895			0.304098	0.295677
3888.37	0.813381	0.179875	-0.408005	2.4968		-0.0558231				-0.334485	0.239291	-0.285148	0.151996			0.310875	0.300492
3934.7	0.823464	0.179875	-0.409063	2.53509		-0.0558231				-0.343568	0.241722	-0.285425	0.151949			0.315358	0.304903
3981	0.829299	0.179875	-0.410061	2.56852		-0.0558231				-0.349187	0.242034	-0.285113	0.154664			0.319356	0.308592
4027.34	0.824508	0.179875	-0.406349	2.59172		-0.0558231				-0.351739	0.239946	-0.28572	0.155185			0.321289	0.31081
4073.64	0.808734	0.179875	-0.398232	2.60971		-0.0558231				-0.35108	0.239522	-0.285703	0.15498			0.322442	0.31201
4119.96	0.792901	0.179875	-0.396159	2.63112		-0.0558231				-0.355083	0.240517	-0.287681	0.15507			0.322748	0.313961
4166.3	0.791889	0.179875	-0.398102	2.66033		-0.0558232				-0.35822	0.239376	-0.292474	0.154692			0.324616	0.317217
4212.56	0.806084	0.179875	-0.399092	2.69594		-0.055823				-0.356363	0.239449	-0.289785	0.1579			0.330909	0.32103
4258.98	0.821168	0.179875	-0.398078	2.73339		-0.0558234				-0.352934	0.23941	-0.28968	0.179325			0.339627	0.324882
4305.16	0.838021	0.179875	-0.400644	2.77404		-0.0558227				-0.351094	0.239406	-0.292526	0.196505			0.347529	0.329379
4351.62	0.856805	0.179875	-0.40249	2.81719		-0.0558236				-0.349514	0.239438	-0.287023	0.19873			0.355242	0.334035
4397.84	0.861884	0.179875	-0.404464	2.85338		-0.0558227				-0.354656	0.239349	-0.289032	0.198493			0.358778	0.338115
4444.15	0.857275	0.179875	-0.40302	2.86749		-0.0558227				-0.362399	0.239917	-0.292466	0.198636			0.358832	0.339738
4490.64	0.836958	0.179875	-0.402523	2.85622		-0.0558272				-0.358481	0.24168	-0.288058	0.196009			0.356206	0.337934
4536.58	0.816379	0.179875	-0.401587	2.85077		-0.0558084				-0.350352	0.241932	-0.284552	0.195245			0.354656	0.336618
4583.45	0.816723	0.179875	-0.40118	2.8512		-0.0558688				-0.343117	0.241895	-0.290045	0.195426			0.354989	0.336592
4629.12	0.827499	0.179875	-0.401114	2.85285		-0.0556901				-0.341599	0.241917	-0.291795	0.195347			0.356365	0.336968
4676.1	0.838161	0.179875	-0.401175	2.85144		-0.0560705				-0.345006	0.241873	-0.291468	0.195399			0.357003	0.33713
4721.85	0.850439	0.179875	-0.400842	2.85312		-0.0552566				-0.34747	0.24194	-0.291338	0.195372			0.358426	0.337592
4767.97	0.857244	0.179875	-0.401459	2.85321		-0.0608218				-0.345907	0.241798	-0.28565	0.195385			0.359297	0.337658
4815.29	0.854516	0.179875	-0.401217	2.85309		-0.0600553				-0.340965	0.242475	-0.28527	0.195379			0.359759	0.337413
4858.48	0.852094	0.179875	-0.401235	2.85383		-0.0604118				-0.331409	0.243245	-0.285314	0.195382			0.360672	0.33717
4910.88	0.852566	0.179875	-0.400922	2.85314		-0.0615594				-0.322028	0.243101	-0.285294	0.195381			0.361584	0.336853
4946.06	0.852641	0.179875	-0.401231	2.85382		-0.0613774				-0.319187	0.243166	-0.285346	0.195381			0.361971	0.336852
4952.05	0.852503	0.179875	-0.401477	2.85435		-0.061727				-0.318919	0.243172	-0.285319	0.195381			0.361982	0.33691

## Sheet: y_noise_alone_vpath
Time	Fly1	Fly2	Fly3	Fly4	Fly5	Fly6	Fly7	Fly8	Fly9	Fly10	Fly11	Fly12	Fly13			AVG	SEM
45.3115	-4.6331e-07	6.80722e-05	0.0073348	1.18979e-07		-1.13271e-06				4.52911e-06	-5.71105e-07	-6.06538e-07	-0.00580869			0.00017734	0.00110089
90.0913	9.1753e-07	-0.00175433	0.0188223	-3.7212e-07		2.39659e-06				-1.16021e-05	1.17287e-06	1.34593e-06	-0.00409635			0.00144061	0.00222192
137.243	-1.74506e-06	-0.00219936	0.023547	1.0281e-06		-4.91791e-06				2.89027e-05	-2.32876e-06	-2.89926e-06	-0.00460458			0.00186234	0.00276206
182.819	3.15334e-06	-0.00208779	0.0269253	-2.63708e-06		9.76199e-06				-6.98748e-05	4.44754e-06	6.06588e-06	-0.00406631			0.00230246	0.00311395
229.371	-5.30382e-06	-0.00214289	0.0352832	6.42674e-06		-1.86632e-05				0.000131549	-8.09679e-06	-1.23226e-05	-0.00441562			0.00320203	0.00404272
275.574	7.73921e-06	-0.00210206	0.043647	-1.5109e-05		3.36588e-05				-0.000325792	1.35322e-05	2.4002e-05	-0.00481898			0.00405156	0.00497923
321.85	-8.29981e-06	-0.00211654	0.047016	3.40542e-05		-5.59504e-05				0.00164679	-1.99201e-05	-4.45435e-05	-0.00328615			0.00479616	0.00529868
368.327	5.00188e-06	-0.00215017	0.0488013	-7.32572e-05		9.41944e-05				0.00224958	2.99537e-05	8.53569e-05	-0.00391709			0.00501388	0.00550299
414.443	4.37941e-05	-0.00195073	0.0568617	0.000169372		-9.96938e-05				0.00776378	1.79658e-06	-0.00013058	-0.00321834			0.00660457	0.00636305
460.94	-0.000327992	-0.00282689	0.0768714	-0.000359241		-0.00036468				0.0233818	-0.000324569	-4.53034e-05	-0.00550285			0.0100557	0.00880705
507.133	-0.000395884	-0.00240106	0.0940009	0.000157584		-0.00113484				0.030901	-0.000875252	-0.00109137	-0.0039381			0.0128025	0.010763
553.513	0.00129389	-0.00165648	0.109686	-0.00229066		0.00740853				0.0475912	0.00291247	0.00509344	-0.005658			0.0182645	0.0125966
599.821	0.052995	0.0829048	0.146079	0.0186961		0.106681				0.119594	0.0736433	0.0618886	0.0429052			0.0783763	0.0133659
646.114	0.159814	0.253825	0.190592	0.112687		0.24731				0.223325	0.228443	0.160488	0.174503			0.194554	0.0157055
692.472	0.305583	0.416623	0.229158	0.273532		0.401078				0.343302	0.442561	0.296403	0.371661			0.342211	0.0238277
738.749	0.47774	0.544975	0.272185	0.459402		0.567636				0.486567	0.703212	0.443725	0.623225			0.508741	0.0407874
785.099	0.663552	0.655404	0.308561	0.659381		0.744418				0.64636	1.00582	0.574353	0.899955			0.684201	0.0656264
831.397	0.857334	0.749031	0.32987	0.854562		0.921951				0.764392	1.32964	0.66926	1.18327			0.851034	0.0962554
877.722	1.04696	0.848381	0.338585	0.979862		1.09649				0.845571	1.6177	0.72423	1.46615			0.995992	0.127528
924.041	1.21917	0.935786	0.344471	1.03948		1.25472				0.899576	1.82004	0.721722	1.74291			1.10865	0.156079
970.352	1.35071	1.01197	0.351359	1.09056		1.40398				0.94032	1.87533	0.69395	1.99861			1.19075	0.176715
1016.68	1.43745	1.08967	0.362196	1.1558		1.53458				0.969391	1.84157	0.696285	2.23809			1.25834	0.191843
1062.99	1.48584	1.16853	0.36479	1.22094		1.64385				0.960115	1.8185	0.705151	2.43046			1.31091	0.206357
1109.31	1.54185	1.23949	0.365156	1.29487		1.71448				0.952907	1.84339	0.704835	2.59591			1.36143	0.221211
1155.63	1.60562	1.29421	0.36529	1.37365		1.71931				0.956407	1.89558	0.705167	2.70845			1.40263	0.231658
1201.95	1.67588	1.34161	0.368086	1.4525		1.6925				0.960972	1.95008	0.704947	2.74583			1.43249	0.236081
1248.26	1.74744	1.38266	0.37167	1.54701		1.67384				0.96121	1.98233	0.705071	2.72292			1.45491	0.236074
1294.58	1.82293	1.42629	0.389392	1.64956		1.67324				0.957981	1.98965	0.704889	2.70327			1.47969	0.235862
1340.9	1.90392	1.47458	0.433077	1.74729		1.6773				0.956634	1.97994	0.70513	2.70557			1.50927	0.235842
1387.22	1.98525	1.51621	0.472398	1.83287		1.67606				0.95726	1.97495	0.704426	2.70775			1.53635	0.236683
1433.53	2.06538	1.54392	0.510323	1.90391		1.68942				0.95521	1.97875	0.71178	2.70918			1.5631	0.237862
1479.85	2.14311	1.55211	0.544544	1.95752		1.71994				0.958602	1.98112	0.728213	2.7088			1.58822	0.238581
1526.17	2.21805	1.54173	0.55579	2.00108		1.75007				0.972347	1.9808	0.762538	2.70894			1.61015	0.239452
1572.49	2.29457	1.52536	0.559716	2.05031		1.75158				0.989074	1.97974	0.787935	2.7089			1.62747	0.241399
1618.8	2.37234	1.5138	0.566106	2.09998		1.74644				1.0041	1.98095	0.784955	2.70877			1.64194	0.245016
1665.12	2.44505	1.50791	0.575106	2.15017		1.74176				1.01518	1.98126	0.7758	2.70878			1.65567	0.248997
1711.44	2.50244	1.50734	0.577851	2.19847		1.73988				1.02069	1.98043	0.775273	2.70874			1.6679	0.252593
1757.76	2.54809	1.50738	0.582521	2.27713		1.74044				1.01848	1.98442	0.781052	2.72689			1.68516	0.257719
1804.08	2.58633	1.50742	0.592298	2.37601		1.74024				1.01482	1.9933	0.781239	2.77134			1.707	0.264974
1850.39	2.63154	1.5074	0.602335	2.45037		1.74027				1.01224	2.00725	0.780791	2.84082			1.73034	0.273352
1896.71	2.67923	1.50746	0.634964	2.46322		1.74038				1.01475	2.02468	0.78398	2.91991			1.75206	0.278694
1943.03	2.69578	1.50717	0.676026	2.46345		1.74				1.01865	2.04393	0.801734	2.98665			1.77038	0.280427
1989.35	2.69336	1.50529	0.709805	2.47257		1.7417				1.02894	2.05445	0.821766	2.99931			1.7808	0.2784
2035.66	2.69717	1.50531	0.738521	2.48057		1.74701				1.03821	2.05181	0.826288	2.97779			1.78474	0.275414
2081.98	2.70459	1.50528	0.75325	2.48229		1.74646				1.0476	2.0427	0.819183	2.97568			1.78634	0.274792
2128.3	2.71252	1.5053	0.758176	2.50455		1.74685				1.05643	2.0385	0.822697	2.97842			1.79149	0.275305
2174.62	2.71837	1.5053	0.773464	2.56239		1.74644				1.06564	2.03952	0.826174	2.97893			1.8018	0.27646
2220.94	2.72093	1.50529	0.792805	2.6368		1.74716				1.07147	2.04145	0.825475	2.97888			1.81336	0.278372
2267.25	2.71931	1.5053	0.800766	2.72595		1.74391				1.07351	2.04037	0.825845	2.97758			1.82362	0.281544
2313.57	2.72304	1.50529	0.814712	2.80975		1.73977				1.07328	2.03971	0.825573	2.96759			1.83319	0.284344
2359.89	2.75614	1.50529	0.838428	2.87714		1.7405				1.07409	2.04002	0.825726	2.97302			1.84782	0.28816
2406.21	2.81627	1.5053	0.855862	2.93028		1.74018				1.0757	2.0401	0.825374	3.0122			1.86681	0.294712
2452.52	2.8576	1.50529	0.866236	2.96497		1.74035				1.07539	2.04008	0.828481	3.04563			1.88045	0.299488
2498.84	2.8623	1.5053	0.886166	2.97454		1.74028				1.07561	2.04008	0.843881	3.05099			1.88657	0.298784
2545.16	2.86687	1.50529	0.914149	2.98905		1.74031				1.07522	2.0401	0.859098	3.04025			1.89226	0.297141
2591.48	2.88424	1.5053	0.933883	2.99864		1.7403				1.07798	2.04006	0.881648	3.0367			1.89986	0.296153
2637.8	2.94952	1.50527	0.942285	2.98683		1.7403				1.08567	2.04016	0.904688	3.04118			1.91066	0.297114
2684.11	2.99625	1.50541	0.951081	2.97461		1.7403				1.09613	2.03975	0.913374	3.04267			1.91773	0.297682
2730.43	3.02519	1.5073	0.970292	3.00918		1.7403				1.10892	2.03994	0.908097	3.04022			1.92771	0.299603
2776.75	3.06841	1.50747	0.999994	3.07424		1.7403				1.12476	2.04013	0.908431	3.04398			1.9453	0.3034
2823.07	3.11515	1.50735	1.0191	3.14935		1.7403				1.1441	2.04006	0.908174	3.07471			1.96648	0.309749
2869.38	3.15758	1.5076	1.03079	3.22942		1.7403				1.1587	2.04004	0.908274	3.13012			1.9892	0.317939
2915.7	3.19432	1.50633	1.05239	3.31178		1.7403				1.17829	2.04035	0.908255	3.17313			2.01168	0.324894
2962.02	3.22386	1.50513	1.07557	3.40424		1.7403				1.19946	2.04409	0.908272	3.17562			2.03073	0.330086
3008.34	3.25218	1.50536	1.09557	3.49858		1.7403				1.2105	2.05054	0.908188	3.15661			2.04643	0.334998
3054.65	3.30327	1.50527	1.11671	3.58112		1.7403				1.21769	2.05262	0.908356	3.15006			2.06393	0.341223
3100.97	3.33581	1.50527	1.14173	3.62511		1.74029				1.22528	2.04837	0.908048	3.15268			2.07584	0.34452
3147.29	3.32112	1.50345	1.15878	3.60986		1.74031				1.22681	2.04891	0.913422	3.1536			2.07514	0.341961
3193.61	3.30276	1.50281	1.17708	3.59119		1.74029				1.2244	2.05198	0.914981	3.15345			2.07322	0.339212
3239.93	3.32045	1.50102	1.20442	3.59049		1.74032				1.22344	2.05279	0.914327	3.1536			2.07787	0.339185
3286.24	3.36328	1.50108	1.25245	3.61954		1.74026				1.22433	2.05281	0.915201	3.15326			2.09136	0.341419
3332.56	3.39937	1.50104	1.3248	3.66914		1.74033				1.22479	2.05279	0.910832	3.15363			2.10853	0.344227
3378.88	3.43816	1.50107	1.39477	3.72655		1.74016				1.22677	2.05279	0.907785	3.15148			2.12662	0.347756
3425.2	3.46769	1.50106	1.40898	3.7836		1.74093				1.22943	2.05279	0.908432	3.16994			2.14032	0.353167
3471.51	3.51768	1.50108	1.38697	3.83725		1.7466				1.22944	2.05278	0.908148	3.20436			2.15381	0.36121
3517.83	3.57315	1.50094	1.38206	3.8939		1.74662				1.23755	2.0527	0.908311	3.25129			2.17184	0.369546
3564.15	3.62233	1.49903	1.41069	3.95191		1.74669				1.24517	2.05274	0.908231	3.31183			2.19429	0.377308
3610.47	3.65375	1.49893	1.46879	4.00951		1.74665				1.24547	2.05306	0.908275	3.32642			2.21232	0.381666
3656.78	3.66737	1.49894	1.52247	4.06639		1.74664				1.24672	2.05524	0.908251	3.30939			2.2246	0.38399
3703.11	3.6824	1.49894	1.55939	4.11976		1.74666				1.24975	2.05986	0.908221	3.31053			2.23728	0.387342
3749.42	3.70373	1.49895	1.57303	4.16186		1.74665				1.25235	2.06259	0.908283	3.31234			2.24664	0.390928
3795.74	3.72877	1.49894	1.55623	4.1929		1.74665				1.25493	2.06444	0.908304	3.31203			2.25147	0.394634
3842.06	3.75649	1.49895	1.54588	4.21996		1.74665				1.26536	2.07015	0.913974	3.31243			2.25887	0.397534
3888.37	3.79158	1.49894	1.54678	4.24472		1.74665				1.28666	2.08107	0.914743	3.31193			2.26923	0.400194
3934.7	3.81616	1.49894	1.54488	4.27148		1.74665				1.30773	2.08859	0.914578	3.32997			2.27989	0.403276
3981	3.83359	1.49894	1.52446	4.30249		1.74665				1.32127	2.08975	0.914649	3.36191			2.28819	0.407549
4027.34	3.85803	1.49894	1.49509	4.34312		1.74665				1.3332	2.08722	0.914585	3.37586			2.29474	0.412549
4073.64	3.8666	1.49894	1.47738	4.38948		1.74665				1.34657	2.08597	0.914623	3.36866			2.29943	0.416015
4119.96	3.86418	1.49894	1.48285	4.43526		1.74665				1.35089	2.08712	0.914602	3.35957			2.30445	0.418489
4166.3	3.87692	1.49894	1.49623	4.47809		1.74665				1.3508	2.08906	0.914613	3.36067			2.31244	0.421853
4212.56	3.91296	1.49894	1.50672	4.5186		1.74665				1.34989	2.08921	0.914608	3.3633			2.32232	0.426444
4258.98	3.93964	1.49894	1.51769	4.55552		1.74665				1.35575	2.08913	0.914611	3.37973			2.33307	0.430553
4305.16	3.9699	1.49894	1.53152	4.59293		1.74665				1.37412	2.08981	0.914608	3.42004			2.34873	0.435227
4351.62	4.01714	1.49894	1.54358	4.63319		1.74665				1.40086	2.0892	0.914611	3.46389			2.36756	0.440929
4397.84	4.07654	1.49894	1.54665	4.67473		1.74665				1.41777	2.08866	0.914607	3.49336			2.38421	0.447423
4444.15	4.14501	1.49894	1.54172	4.68503		1.74665				1.42196	2.08834	0.914615	3.49298			2.3928	0.451787
4490.64	4.21917	1.49894	1.53664	4.67248		1.74665				1.42785	2.08973	0.9146	3.47924			2.39837	0.454456
4536.58	4.29323	1.49894	1.53527	4.67141		1.74665				1.44021	2.09074	0.914627	3.47426			2.40726	0.458059
4583.45	4.3519	1.49894	1.5355	4.67204		1.74665				1.46302	2.09059	0.914581	3.47419			2.41638	0.460823
4629.12	4.41156	1.49894	1.53544	4.67263		1.74665				1.49234	2.09045	0.914639	3.47421			2.42632	0.463548
4676.1	4.4556	1.49894	1.53547	4.67133		1.74665				1.50994	2.09063	0.914545	3.47426			2.43304	0.465614
4721.85	4.47467	1.49894	1.53549	4.67156		1.74665				1.51514	2.09097	0.914895	3.47424			2.43584	0.46662
4767.97	4.48461	1.49894	1.53542	4.67146		1.74665				1.51807	2.09081	0.917358	3.47425			2.43751	0.467029
4815.29	4.48148	1.49894	1.53558	4.67151		1.74665				1.52544	2.09123	0.914504	3.47425			2.43773	0.466762
4858.48	4.48185	1.49894	1.53503	4.67148		1.74665				1.54007	2.09213	0.914724	3.47425			2.43946	0.466383
4910.88	4.48284	1.49894	1.53446	4.67153		1.74665				1.55525	2.09179	0.914964	3.47425			2.44119	0.466051
4946.06	4.4816	1.49894	1.5354	4.67134		1.74665				1.56356	2.09187	0.914545	3.47425			2.44202	0.465738
4952.05	4.4815	1.49894	1.53536	4.67121		1.74665				1.56455	2.09194	0.914529	3.47425			2.4421	0.465698

## Sheet: x_signal_alone_vpath
Time	Fly1	Fly2	Fly3	Fly4	Fly5	Fly6	Fly7	Fly8	Fly9	Fly10	Fly11	Fly12	Fly13			AVG	SEM
45.3115	4.1195e-08	-3.82016e-15	2.57047e-16	-6.56737e-15		1.22665e-14		-2.93339e-15	1.61547e-15	1.11355e-14	-4.69904e-15		-3.83695e-16			4.11951e-09	4.1195e-09
90.0913	-1.07315e-07	8.62222e-15	2.42577e-15	1.21643e-14		-3.04198e-14		9.54333e-15	-1.59419e-14	-2.71362e-14	3.38261e-15		-6.99817e-16			-1.07315e-08	1.07315e-08
137.243	2.64387e-07	-1.88815e-14	-1.14953e-14	-2.11696e-14		7.2239e-14		-2.69104e-14	6.02031e-14	6.35451e-14	7.45078e-15		4.75341e-15			2.64387e-08	2.64387e-08
182.819	-6.24549e-07	4.0157e-14	3.7557e-14	3.34295e-14		-1.65559e-13		6.9978e-14	-1.81661e-13	-1.43883e-13	-4.7347e-14		-1.69381e-14			-6.2455e-08	6.24549e-08
229.371	1.4295e-06	-8.28802e-14	-1.0613e-13	-4.36865e-14		3.67725e-13		-1.7225e-13	4.91986e-13	3.16029e-13	1.66485e-13		4.98652e-14			1.4295e-07	1.4295e-07
275.574	-3.15322e-06	1.65544e-13	2.76355e-13	3.03273e-14		-7.93036e-13		4.06638e-13	-1.246e-12	-6.7413e-13	-4.8722e-13		-1.33132e-13			-3.15322e-07	3.15322e-07
321.85	6.64448e-06	-3.18256e-13	-6.80913e-13	7.40275e-14		1.66068e-12		-9.2723e-13	3.00746e-12	1.39571e-12	1.29622e-12		3.33886e-13			6.64448e-07	6.64448e-07
368.327	-1.47839e-05	5.83018e-13	1.60871e-12	-4.55186e-13		-3.37086e-12		2.04992e-12	-6.98746e-12	-2.79761e-12	-3.24286e-12		-7.99876e-13			-1.4784e-06	1.47839e-06
414.443	3.12921e-05	-9.98432e-13	-3.67071e-12	1.58943e-12		6.60556e-12		-4.4009e-12	1.57121e-11	5.40123e-12	7.75405e-12		1.84684e-12			3.12921e-06	3.12921e-06
460.94	-1.78978e-05	1.53343e-12	8.12026e-12	-4.6368e-12		-1.2403e-11		9.17286e-12	-3.42864e-11	-9.9498e-12	-1.78748e-11		-4.12968e-12			-1.78978e-06	1.78978e-06
507.133	0.000154364	-1.87685e-12	-1.74436e-11	1.23126e-11		2.20064e-11		-1.85239e-11	7.26635e-11	1.71792e-11	3.9912e-11		8.96389e-12			1.54364e-05	1.54364e-05
553.513	-0.00150923	8.51482e-13	3.63809e-11	-3.07628e-11		-3.58745e-11		3.60815e-11	-1.4941e-10	-2.67638e-11	-8.65137e-11		-1.88956e-11			-0.000150923	0.000150923
599.821	-0.00761035	5.09755e-12	-7.35191e-11	7.34818e-11		5.01852e-11		-6.72325e-11	2.97171e-10	3.39044e-11	1.82113e-10		3.86304e-11			-0.000761035	0.000761035
646.114	-0.00956981	-2.56018e-11	1.4332e-10	-1.69245e-10		-4.65752e-11		1.18012e-10	-5.68379e-10	-1.97311e-11	-3.71752e-10		-7.63315e-11			-0.000956981	0.000956981
692.472	-0.00839055	8.50612e-11	-2.67335e-10	3.77606e-10		-3.51963e-11		-1.89041e-10	1.03415e-09	-7.36129e-11	7.33285e-10		1.4482e-10			-0.000839055	0.000839055
738.749	-0.00442589	-2.42382e-10	4.69943e-10	-8.17891e-10		3.65709e-10		2.54936e-10	-1.75309e-09	4.0423e-10	-1.38823e-09		-2.60649e-10			-0.000442589	0.000442589
785.099	0.0166118	6.34451e-10	-7.54629e-10	1.72036e-09		-1.38971e-09		-2.05018e-10	2.64389e-09	-1.37495e-09	2.49121e-09		4.34582e-10			0.00166118	0.00166118
831.397	0.0509069	-1.56912e-09	1.023e-09	-3.50892e-09		4.20405e-09		-3.12905e-10	-3.08916e-09	3.96251e-09	-4.13469e-09		-6.35498e-10			0.00509069	0.00509069
877.722	0.107242	3.71829e-09	-8.41034e-10	6.91479e-09		-1.1402e-08		2.28071e-09	8.44464e-10	-1.04448e-08	5.99353e-09		6.81243e-10			0.0107242	0.0107242
924.041	0.157371	-8.50608e-09	-1.17773e-09	-1.30753e-08		2.89048e-08		-8.23315e-09	1.07558e-08	2.59608e-08	-6.25755e-09		5.73098e-11			0.0157371	0.0157371
970.352	0.194937	1.88613e-08	8.90641e-09	2.34258e-08		-6.98184e-08		2.43764e-08	-4.95993e-08	-6.17603e-08	-1.2513e-09		-3.40617e-09			0.0194937	0.0194937
1016.68	0.225194	-4.06113e-08	-3.23566e-08	-3.87822e-08		1.62312e-07		-6.52992e-08	1.60702e-07	1.41759e-07	3.43633e-08		1.41985e-08			0.0225194	0.0225193
1062.99	0.248103	8.48988e-08	9.60608e-08	5.59418e-08		-3.6518e-07		1.64146e-07	-4.52216e-07	-3.15299e-07	-1.40136e-07		-4.44908e-08			0.0248102	0.0248103
1109.31	0.271116	-1.71987e-07	-2.57748e-07	-5.7501e-08		7.97325e-07		-3.93949e-07	1.1745e-06	6.80897e-07	4.35677e-07		1.23044e-07			0.0271118	0.0271115
1155.63	0.306552	3.3652e-07	6.48734e-07	-1.53439e-08		-1.69028e-06		9.10874e-07	-2.88766e-06	-1.42768e-06	-1.19897e-06		-3.15701e-07			0.0306547	0.0306553
1201.95	0.345226	-6.30341e-07	-1.55753e-06	3.3199e-07		3.4777e-06		-2.03947e-06	6.81019e-06	2.90237e-06	3.0689e-06		7.70055e-07			0.0345239	0.0345225
1248.26	0.388864	1.10489e-06	3.60281e-06	-1.3465e-06		-6.93485e-06		4.43585e-06	-1.55497e-05	-5.70244e-06	-7.49579e-06		-1.81407e-06			0.0388834	0.0388867
1294.58	0.42731	-1.82064e-06	-8.10637e-06	4.14926e-06		1.32079e-05		-9.3514e-06	3.42928e-05	1.07059e-05	1.74719e-05		4.06552e-06			0.0427375	0.0427303
1340.9	0.461466	2.76512e-06	1.75401e-05	-1.11698e-05		-2.37819e-05		1.90596e-05	-7.25872e-05	-1.8955e-05	-3.8701e-05		-8.72858e-06			0.0461332	0.0461481
1387.22	0.500557	-3.64779e-07	-3.60335e-05	3.0158e-05		4.4137e-05		-3.8534e-05	0.000157887	3.2449e-05	9.08527e-05		2.12689e-05			0.0500859	0.0500524
1433.53	0.541847	-5.46652e-06	8.16063e-05	-7.59232e-05		-6.26882e-05		7.33309e-05	-0.000330855	-4.42646e-05	-0.000202243		-4.1396e-05			0.0541239	0.0541915
1479.85	0.575665	-6.95077e-05	-0.000170128	0.000102806		-5.9287e-05		-9.93242e-05	0.000323649	-6.47452e-06	0.000143662		-1.24321e-05			0.0575818	0.0575648
1526.17	0.604436	-0.000318589	-2.52597e-05	-0.000435092		-0.000554987		0.000297247	-0.00143057	-0.000179205	-0.00108006		-0.000478473			0.0600231	0.0604906
1572.49	0.634572	0.0028016	-0.00104616	0.00312016		0.00287236		-0.0012349	0.011991	0.000821228	0.00987759		0.00265601			0.066643	0.0631177
1618.8	0.659891	0.0211455	0.0111144	0.0116471		0.0366312		-0.00689114	0.0549001	0.0143234	0.0482963		0.0233351			0.0874392	0.0638741
1665.12	0.671423	0.0632855	0.0660729	0.037461		0.0953889		-0.0119955	0.0865886	0.0296581	0.0916722		0.0724172			0.120197	0.0621268
1711.44	0.671216	0.11101	0.149248	0.0782885		0.162		-0.0222642	0.13502	0.0640657	0.128231		0.13943			0.161625	0.05916
1757.76	0.692677	0.146513	0.250731	0.119177		0.209667		-0.0201667	0.183675	0.0943737	0.15103		0.205948			0.203363	0.0593491
1804.08	0.735533	0.12586	0.360836	0.18108		0.235783		-0.0167475	0.201387	0.126604	0.140754		0.258084			0.234917	0.0638452
1850.39	0.791157	0.0763614	0.443726	0.251809		0.23046		-0.0111577	0.185475	0.144326	0.109773		0.293338			0.251527	0.0719543
1896.71	0.854527	0.0446	0.554681	0.311754		0.207105		-0.015081	0.158125	0.154249	0.0578359		0.304115			0.263191	0.0838066
1943.03	0.918423	0.0217681	0.653249	0.375702		0.177746		-0.0200673	0.139737	0.157409	0.0142857		0.306452			0.27447	0.0959709
1989.35	0.978024	0.0125351	0.724251	0.434194		0.147717		-0.0252479	0.124997	0.168446	0.00677825		0.301554			0.287325	0.105495
2035.66	1.01101	0.0273085	0.783042	0.474778		0.129905		-0.0102476	0.112768	0.181508	0.0169101		0.279801			0.300678	0.110484
2081.98	1.01134	0.0447841	0.834416	0.516044		0.135248		0.0049425	0.0992034	0.185344	0.0443034		0.24628			0.312191	0.112441
2128.3	1.01474	0.070012	0.883669	0.552832		0.153501		0.0269295	0.0969572	0.193835	0.0817275		0.208588			0.328279	0.113767
2174.62	1.00912	0.099065	0.926858	0.584111		0.180146		0.0528981	0.104789	0.205476	0.0959708		0.174701			0.343313	0.114403
2220.94	1.01977	0.124947	0.962878	0.619604		0.215528		0.101909	0.104689	0.210883	0.0930298		0.155888			0.360913	0.115913
2267.25	1.03599	0.139418	0.992668	0.662462		0.250526		0.135666	0.111335	0.218223	0.0881999		0.13607			0.377056	0.11845
2313.57	1.04123	0.150783	1.0165	0.715032		0.285761		0.15252	0.122769	0.231905	0.0779665		0.107674			0.390213	0.121115
2359.89	1.05509	0.157325	1.03646	0.783365		0.312791		0.165766	0.12518	0.248061	0.0618423		0.0852489			0.403113	0.125366
2406.21	1.0956	0.166738	1.04472	0.830242		0.328208		0.170181	0.136617	0.266291	0.0417892		0.0649501			0.414534	0.130074
2452.52	1.14356	0.178019	1.05954	0.867473		0.330007		0.183016	0.164582	0.284515	0.0355397		0.0563781			0.430263	0.134088
2498.84	1.18311	0.197249	1.06411	0.901912		0.314102		0.188868	0.178335	0.29616	0.0343144		0.0611569			0.441932	0.137039
2545.16	1.20754	0.221883	1.06746	0.912669		0.287647		0.194486	0.192405	0.320351	0.0233434		0.0582217			0.4486	0.138706
2591.48	1.22793	0.242188	1.07588	0.904058		0.253774		0.210649	0.225838	0.329474	0.00545347		0.0595203			0.453476	0.139714
2637.8	1.25569	0.261121	1.08684	0.878212		0.215829		0.217512	0.265685	0.323722	0.0265098		0.0555344			0.458665	0.140109
2684.11	1.28393	0.274341	1.09017	0.873614		0.195448		0.232042	0.301989	0.307772	0.0717658		0.0421558			0.467323	0.140491
2730.43	1.31774	0.286098	1.08796	0.896671		0.197845		0.244829	0.330665	0.28234	0.098553		0.0233542			0.476606	0.142706
2776.75	1.34527	0.305357	1.09524	0.944208		0.210494		0.249892	0.343827	0.259146	0.109854		0.0207563			0.488404	0.145805
2823.07	1.37057	0.319007	1.10715	1.04144		0.227709		0.254629	0.368718	0.226544	0.125792		0.0222153			0.506377	0.150802
2869.38	1.40831	0.314088	1.10922	1.15193		0.251293		0.259973	0.370073	0.197899	0.141189		0.0295498			0.523354	0.157339
2915.7	1.45629	0.311166	1.11313	1.23889		0.273394		0.263139	0.347436	0.177784	0.155849		0.0320781			0.536915	0.164329
2962.02	1.51576	0.306461	1.11544	1.27554		0.289977		0.26852	0.31796	0.171199	0.167823		0.0422981			0.547098	0.169511
3008.34	1.57623	0.316027	1.10714	1.27023		0.308222		0.272685	0.30018	0.183519	0.179702		0.0502314			0.556416	0.171774
3054.65	1.63004	0.322943	1.08285	1.26762		0.337154		0.276914	0.292324	0.205506	0.194607		0.0518743			0.566183	0.173003
3100.97	1.67386	0.332163	1.05985	1.27786		0.363353		0.278881	0.284187	0.234626	0.195186		0.0711528			0.577112	0.174055
3147.29	1.70575	0.351307	1.02996	1.29402		0.398933		0.272043	0.2706	0.263191	0.188351		0.121435			0.589559	0.173794
3193.61	1.74651	0.383216	1.0008	1.312		0.411788		0.250454	0.24997	0.283983	0.191808		0.158234			0.598876	0.175462
3239.93	1.77519	0.432888	0.982911	1.34017		0.403377		0.234892	0.208947	0.302902	0.220744		0.186615			0.608863	0.177343
3286.24	1.79811	0.483621	0.961376	1.38192		0.391948		0.218237	0.175894	0.304986	0.249772		0.203183			0.616905	0.180253
3332.56	1.82614	0.543831	0.922369	1.42639		0.372173		0.201625	0.16588	0.310169	0.279977		0.202685			0.625123	0.183498
3378.88	1.86223	0.602881	0.880363	1.47622		0.354941		0.194926	0.167817	0.3197	0.305518		0.182733			0.634733	0.187908
3425.2	1.90494	0.652317	0.862626	1.5404		0.344541		0.199273	0.184202	0.324338	0.326571		0.146833			0.648604	0.194083
3471.51	1.93923	0.692152	0.865863	1.6075		0.344359		0.195396	0.206462	0.333074	0.340133		0.117087			0.664125	0.200071
3517.83	1.95748	0.719026	0.887699	1.65954		0.34472		0.203979	0.22756	0.338406	0.342819		0.106329			0.678756	0.203832
3564.15	1.97095	0.732715	0.926103	1.67904		0.344062		0.202077	0.254812	0.3358	0.338949		0.104601			0.688911	0.205889
3610.47	1.99256	0.741124	0.968347	1.71619		0.33913		0.189631	0.270025	0.340144	0.333158		0.118617			0.700893	0.209622
3656.78	2.01648	0.760059	0.994123	1.74957		0.328718		0.188894	0.269471	0.336173	0.345738		0.14641			0.713563	0.212701
3703.11	2.04744	0.780512	0.99892	1.765		0.313236		0.207638	0.264689	0.338658	0.351003		0.174545			0.724164	0.21473
3749.42	2.06174	0.792681	0.986813	1.78985		0.295275		0.229152	0.250392	0.342156	0.340086		0.189054			0.72772	0.216835
3795.74	2.04494	0.793708	0.970028	1.8121		0.272556		0.239279	0.237375	0.345865	0.342795		0.196243			0.725489	0.216964
3842.06	2.04269	0.790001	0.943211	1.84953		0.24558		0.242907	0.222539	0.361515	0.360506		0.19511			0.725358	0.218916
3888.37	2.05974	0.79162	0.922269	1.87861		0.213141		0.257269	0.209789	0.369545	0.363734		0.184939			0.725066	0.222372
3934.7	2.06239	0.794006	0.911399	1.89544		0.181589		0.270049	0.200388	0.377259	0.345551		0.181115			0.721918	0.224503
3981	2.05325	0.798752	0.917875	1.90656		0.140614		0.281952	0.189225	0.389856	0.336842		0.183259			0.719818	0.225685
4027.34	2.0401	0.799022	0.922152	1.91567		0.0959603		0.296745	0.17471	0.394948	0.336637		0.186409			0.716235	0.22663
4073.64	2.03521	0.80259	0.913898	1.92949		0.048614		0.300113	0.168045	0.413275	0.337293		0.189148			0.713767	0.228296
4119.96	2.04778	0.816916	0.901743	1.94718		-0.00816778		0.299005	0.164645	0.430807	0.335518		0.195446			0.713086	0.231742
4166.3	2.03324	0.832966	0.889394	1.97395		-0.056338		0.29939	0.148052	0.450121	0.336098		0.201807			0.710869	0.23412
4212.56	1.99127	0.847006	0.874253	1.99247		-0.0955022		0.301677	0.133344	0.478116	0.33606		0.199263			0.705796	0.234153
4258.98	1.9611	0.856016	0.851379	1.99839		-0.118193		0.301515	0.136092	0.490576	0.337861		0.192581			0.700732	0.233384
4305.16	1.91555	0.875648	0.823832	2.00827		-0.147695		0.302603	0.152262	0.506805	0.344465		0.190939			0.697269	0.231772
4351.62	1.84931	0.899377	0.800135	2.02613		-0.181507		0.30226	0.146074	0.517587	0.352031		0.192815			0.690422	0.230509
4397.84	1.81322	0.930529	0.770663	2.04523		-0.21675		0.301187	0.143226	0.521624	0.358149		0.19335			0.686043	0.23142
4444.15	1.80043	0.961288	0.742884	2.05618		-0.249928		0.302761	0.143598	0.52594	0.360094		0.19341			0.683665	0.233091
4490.64	1.78564	0.988839	0.724485	2.06621		-0.286116		0.290693	0.142381	0.516862	0.346161		0.192565			0.676772	0.235488
4536.58	1.78359	1.01712	0.718198	2.08562		-0.329883		0.262949	0.141219	0.513162	0.329557		0.190172			0.67117	0.239969
4583.45	1.78929	1.03403	0.719492	2.09525		-0.367174		0.240212	0.141916	0.509201	0.316147		0.190212			0.666858	0.243575
4629.12	1.79565	1.04744	0.710631	2.09871		-0.399087		0.22221	0.148375	0.498061	0.300203		0.188814			0.661102	0.24642
4676.1	1.81372	1.06511	0.69956	2.10729		-0.432293		0.217333	0.15484	0.493836	0.287132		0.188893			0.659542	0.249983
4721.85	1.82253	1.07092	0.683813	2.10815		-0.473454		0.218275	0.163566	0.476454	0.270191		0.189795			0.653023	0.252775
4767.97	1.82056	1.07077	0.668105	2.11213		-0.513272		0.227462	0.172147	0.466556	0.254613		0.186606			0.646568	0.254953
4815.29	1.82248	1.07728	0.665164	2.12791		-0.541643		0.239703	0.176655	0.457173	0.244958		0.184816			0.645449	0.257586
4858.48	1.8257	1.09541	0.670234	2.15469		-0.570009		0.238248	0.176668	0.444983	0.231656		0.188636			0.645622	0.261553
4910.88	1.82605	1.11712	0.672671	2.19542		-0.600418		0.224188	0.175884	0.442859	0.219633		0.195788			0.646919	0.266544
4946.06	1.83261	1.12887	0.676205	2.22276		-0.631701		0.210329	0.170602	0.458565	0.213492		0.206537			0.648827	0.270634
4952.05	1.83522	1.13035	0.677178	2.22658		-0.638681		0.208151	0.16874	0.462004	0.212344		0.208879			0.649076	0.271433

## Sheet: y_signal_alone_vpath
Time	Fly1	Fly2	Fly3	Fly4	Fly5	Fly6	Fly7	Fly8	Fly9	Fly10	Fly11	Fly12	Fly13			AVG	SEM
45.3115	-4.72221e-07	1.63201e-14	3.52095e-15	1.41821e-14		1.94864e-14		1.85568e-14	3.13548e-15	-1.40692e-14	2.03056e-14		1.2072e-14			-4.72221e-08	4.72221e-08
90.0913	9.55415e-07	-4.77527e-14	-1.49434e-14	-3.67317e-14		-6.51142e-14		-4.50923e-14	-2.21768e-14	1.22795e-14	-5.45486e-14		-3.91797e-14			9.55415e-08	9.55416e-08
137.243	-1.86469e-06	1.2703e-13	4.7116e-14	9.01513e-14		1.86062e-13		1.05347e-13	7.96248e-14	1.31697e-14	1.37388e-13		1.10344e-13			-1.86468e-07	1.86469e-07
182.819	3.48501e-06	-3.17779e-13	-1.30718e-13	-2.12326e-13		-4.87874e-13		-2.38046e-13	-2.35196e-13	-1.1294e-13	-3.30216e-13		-2.86718e-13			3.485e-07	3.48501e-07
229.371	-6.15481e-06	7.59801e-13	3.36395e-13	4.83176e-13		1.20811e-12		5.21852e-13	6.29171e-13	4.18499e-13	7.64531e-13		7.05358e-13			-6.1548e-07	6.15481e-07
275.574	9.84231e-06	-1.75142e-12	-8.21743e-13	-1.06622e-12		-2.86562e-12		-1.11106e-12	-1.58006e-12	-1.25296e-12	-1.71377e-12		-1.66441e-12			9.84229e-07	9.84231e-07
321.85	-1.32462e-05	3.91053e-12	1.92805e-12	2.28484e-12		6.56102e-12		2.29573e-12	3.78927e-12	3.3782e-12	3.72866e-12		3.79378e-12			-1.32462e-06	1.32462e-06
368.327	1.52116e-05	-8.47617e-12	-4.37307e-12	-4.75329e-12		-1.45596e-11		-4.59133e-12	-8.75675e-12	-8.52965e-12	-7.8786e-12		-8.38431e-12			1.52116e-06	1.52116e-06
414.443	1.76031e-05	1.78417e-11	9.62047e-12	9.57876e-12		3.13717e-11		8.84038e-12	1.95963e-11	2.05403e-11	1.61483e-11		1.79936e-11			1.76033e-06	1.76031e-06
460.94	-0.000246754	-3.64192e-11	-2.0554e-11	-1.86116e-11		-6.56356e-11		-1.62277e-11	-4.2568e-11	-4.76313e-11	-3.20018e-11		-3.74908e-11			-2.46754e-05	2.46754e-05
507.133	-0.000309019	7.18335e-11	4.26252e-11	3.45696e-11		1.33097e-10		2.78738e-11	8.98007e-11	1.06921e-10	6.09354e-11		7.56793e-11			-3.09018e-05	3.09019e-05
553.513	0.00115941	-1.35984e-10	-8.55974e-11	-6.04045e-11		-2.60517e-10		-4.30357e-11	-1.83741e-10	-2.32943e-10	-1.1021e-10		-1.47341e-10			0.000115941	0.000115941
599.821	0.0430321	2.44004e-10	1.65625e-10	9.60336e-11		4.88452e-10		5.33572e-11	3.63407e-10	4.92874e-10	1.85142e-10		2.74382e-10			0.00430321	0.00430321
646.114	0.117888	-4.04921e-10	-3.05983e-10	-1.27401e-10		-8.64888e-10		-2.67988e-11	-6.90284e-10	-1.01169e-09	-2.74602e-10		-4.81204e-10			0.0117888	0.0117888
692.472	0.217048	5.86806e-10	5.30523e-10	9.52016e-11		1.40533e-09		-1.33911e-10	1.24436e-09	2.00823e-09	3.06638e-10		7.69733e-10			0.0217048	0.0217048
738.749	0.32885	-6.12158e-10	-8.32471e-10	1.87179e-10		-1.95283e-09		6.9312e-10	-2.07983e-09	-3.83171e-09	-2.73551e-11		-1.03487e-09			0.032885	0.032885
785.099	0.448529	-1.24613e-10	1.07234e-09	-1.23692e-09		1.76888e-09		-2.32188e-09	3.05559e-09	6.94919e-09	-1.30746e-09		8.21301e-10			0.0448529	0.0448529
831.397	0.564047	3.37128e-09	-6.89148e-10	4.38401e-09		1.55421e-09		6.64278e-09	-3.32065e-09	-1.17228e-08	5.67961e-09		1.31663e-09			0.0564047	0.0564047
877.722	0.654789	-1.37388e-08	-2.0518e-09	-1.28757e-08		-1.48129e-08		-1.74312e-08	-8.38187e-11	1.7522e-08	-1.80504e-08		-9.40459e-09			0.0654789	0.0654789
924.041	0.715135	4.26954e-08	1.19134e-08	3.43277e-08		5.5693e-08		4.31877e-08	1.5773e-08	-1.99883e-08	5.02891e-08		3.38275e-08			0.0715135	0.0715135
970.352	0.74465	-1.17536e-07	-4.10686e-08	-8.60072e-08		-1.67749e-07		-1.02484e-07	-6.65967e-08	3.53753e-09	-1.29768e-07		-9.99981e-08			0.0744649	0.074465
1016.68	0.767161	3.00933e-07	1.19098e-07	2.05885e-07		4.53833e-07		2.34726e-07	2.09591e-07	7.77659e-08	3.17626e-07		2.67623e-07			0.0767164	0.0767161
1062.99	0.807594	-7.32364e-07	-3.15147e-07	-4.7508e-07		-1.1486e-06		-5.21068e-07	-5.80945e-07	-3.46718e-07	-7.46467e-07		-6.72321e-07			0.0807589	0.0807595
1109.31	0.863421	1.71323e-06	7.85549e-07	1.06178e-06		2.77112e-06		1.12321e-06	1.4943e-06	1.1117e-06	1.69564e-06		1.61286e-06			0.0863435	0.086342
1155.63	0.917332	-3.87413e-06	-1.87162e-06	-2.30257e-06		-6.43361e-06		-2.34973e-06	-3.64701e-06	-3.10903e-06	-3.7338e-06		-3.72686e-06			0.0917301	0.0917336
1201.95	0.981179	8.50086e-06	4.30331e-06	4.85175e-06		1.44599e-05		4.76695e-06	8.552e-06	8.04156e-06	7.9865e-06		8.34129e-06			0.0981249	0.0981171
1248.26	1.04194	-1.81713e-05	-9.63395e-06	-9.94575e-06		-3.16244e-05		-9.37392e-06	-1.94613e-05	-1.98231e-05	-1.66451e-05		-1.81695e-05			0.104179	0.104196
1294.58	1.1109	3.73873e-05	2.06568e-05	1.94743e-05		6.67021e-05		1.74056e-05	4.25788e-05	4.64321e-05	3.32682e-05		3.81588e-05			0.111122	0.111086
1340.9	1.17725	-7.34935e-05	-4.22385e-05	-3.62775e-05		-0.000135014		-2.99943e-05	-8.90155e-05	-0.000102626	-6.29221e-05		-7.69336e-05			0.11766	0.117732
1387.22	1.23346	0.000155376	9.80561e-05	7.44524e-05		0.000288956		5.94048e-05	0.000201494	0.000248139	0.000131335		0.000164185			0.123488	0.12333
1433.53	1.2896	-0.00028452	-0.000189261	-0.000112061		-0.00055144		-7.48907e-05	-0.000411859	-0.000561855	-0.000230809		-0.000309068			0.128688	0.128991
1479.85	1.33615	-5.3749e-05	-0.000113185	-0.000157796		0.000179845		-0.000318207	8.26266e-05	0.000164597	-0.000237782		8.67797e-05			0.133579	0.133619
1526.17	1.38674	-0.00214334	-0.0018721	-0.00149051		-0.00368853		-0.00138937	-0.00279698	-0.00327481	-0.00192688		-0.00217102			0.136599	0.138905
1572.49	1.45637	0.0156625	0.013531	0.00738543		0.0249101		0.00891622	0.0227254	0.0346516	0.0170059		0.0139209			0.161508	0.143896
1618.8	1.58196	0.123949	0.108393	0.0874281		0.182527		0.102937	0.148254	0.185455	0.138695		0.107201			0.27668	0.145405
1665.12	1.73405	0.295281	0.301605	0.264474		0.434996		0.290591	0.362876	0.425874	0.345964		0.269137			0.472485	0.141479
1711.44	1.88028	0.487985	0.540057	0.522035		0.756847		0.538381	0.658175	0.706008	0.613886		0.499235			0.720289	0.132078
1757.76	1.99823	0.672556	0.789448	0.814551		1.11282		0.827855	1.00211	1.01894	0.921966		0.768807			0.992728	0.11945
1804.08	2.10593	0.879266	1.04619	1.11822		1.48847		1.1142	1.3697	1.35016	1.2595		1.06575			1.27974	0.10821
1850.39	2.24533	1.11199	1.31066	1.43339		1.86185		1.36828	1.73224	1.68586	1.60774		1.37494			1.57323	0.103104
1896.71	2.41925	1.35013	1.59696	1.74053		2.22938		1.61896	2.06084	2.00693	1.93777		1.68391			1.86446	0.102713
1943.03	2.6012	1.60655	1.88705	2.03406		2.58733		1.90455	2.38437	2.32768	2.23031		2.00351			2.15666	0.102576
1989.35	2.76829	1.8559	2.17675	2.33287		2.94662		2.19607	2.71126	2.64087	2.47879		2.32204			2.44295	0.104092
2035.66	2.93464	2.10758	2.48024	2.56878		3.28819		2.47279	3.0466	2.96357	2.71997		2.63047			2.72128	0.108496
2081.98	3.12572	2.36894	2.79827	2.72939		3.60905		2.69561	3.39021	3.2805	2.96429		2.92437			2.98863	0.116819
2128.3	3.34558	2.62797	3.12164	2.91138		3.93437		2.89089	3.73863	3.60804	3.22601		3.20238			3.26069	0.128805
2174.62	3.58329	2.88447	3.45624	3.09193		4.2693		3.1139	4.10033	3.9475	3.50831		3.47205			3.54273	0.142922
2220.94	3.80597	3.13365	3.78945	3.25732		4.60083		3.36275	4.48686	4.29508	3.81288		3.72735			3.82721	0.159377
2267.25	4.03903	3.37387	4.12798	3.44822		4.93988		3.58538	4.88864	4.66227	4.1412		3.98275			4.11892	0.178786
2313.57	4.28006	3.63147	4.46148	3.67959		5.28933		3.79598	5.3015	5.05107	4.47512		4.23457			4.42002	0.198582
2359.89	4.49749	3.90429	4.79704	3.92952		5.64407		4.01667	5.65061	5.46298	4.81009		4.48836			4.72011	0.215358
2406.21	4.68508	4.1878	5.12225	4.15453		6.0035		4.25575	6.02074	5.8918	5.15113		4.76329			5.02359	0.234759
2452.52	4.88058	4.475	5.42506	4.38287		6.37146		4.51609	6.38191	6.34248	5.48088		5.03284			5.32892	0.25449
2498.84	5.06801	4.77197	5.74324	4.60467		6.75212		4.78432	6.69921	6.80173	5.8116		5.30629			5.63432	0.273744
2545.16	5.26954	5.0877	6.06845	4.80645		7.14753		5.0618	6.99098	7.24691	6.14378		5.60202			5.94252	0.292024
2591.48	5.46447	5.40864	6.40137	5.00736		7.56145		5.35039	7.27478	7.68124	6.47891		5.91787			6.25465	0.310596
2637.8	5.67584	5.7443	6.7411	5.20112		7.99018		5.63965	7.5521	8.06135	6.79243		6.25178			6.56498	0.3267
2684.11	5.87644	6.09614	7.09593	5.38324		8.42333		5.94118	7.81368	8.42142	7.04101		6.59357			6.86859	0.34199
2730.43	6.07802	6.46041	7.47005	5.54685		8.86413		6.22332	8.07144	8.75498	7.25401		6.90899			7.16322	0.3588
2776.75	6.29071	6.81848	7.85089	5.66083		9.28942		6.51003	8.3282	9.05632	7.46328		7.18325			7.44514	0.377039
2823.07	6.4927	7.17082	8.23593	5.75004		9.69525		6.79696	8.55531	9.36283	7.67544		7.48878			7.72241	0.396658
2869.38	6.69591	7.5419	8.62264	5.84118		10.1008		7.08555	8.78433	9.65634	7.90528		7.82535			8.00593	0.416413
2915.7	6.89545	7.91825	9.02431	5.95008		10.4636		7.37367	9.04766	9.95388	8.15115		8.17762			8.29557	0.435069
2962.02	7.08622	8.2953	9.43208	6.08232		10.7803		7.66484	9.32506	10.2645	8.40755		8.55377			8.5892	0.451885
3008.34	7.27691	8.66267	9.86049	6.24497		11.027		7.94986	9.61251	10.5745	8.68685		8.98945			8.88852	0.464914
3054.65	7.47179	9.03458	10.3138	6.44505		11.2566		8.24303	9.90228	10.8909	8.98207		9.45836			9.19984	0.476751
3100.97	7.66148	9.41128	10.775	6.66914		11.5013		8.54222	10.2038	11.2071	9.28858		9.92448			9.51845	0.489684
3147.29	7.84425	9.79252	11.2414	6.91483		11.7598		8.80565	10.5221	11.5246	9.60845		10.3513			9.8365	0.504199
3193.61	8.03055	10.1735	11.7	7.17446		12.0367		8.98844	10.8352	11.8375	9.92689		10.7166			10.142	0.520098
3239.93	8.21846	10.5569	12.1416	7.43435		12.3123		9.15206	11.1394	12.1332	10.2161		11.0236			10.4328	0.535298
3286.24	8.42065	10.9387	12.5404	7.68956		12.5975		9.36813	11.433	12.4156	10.5017		11.3205			10.7226	0.547482
3332.56	8.62516	11.32	12.8791	7.94244		12.883		9.61479	11.7306	12.6813	10.7961		11.6092			11.0082	0.556365
3378.88	8.80606	11.6988	13.1502	8.13238		13.1692		9.86575	12.0431	12.9326	11.1033		11.8976			11.2799	0.567607
3425.2	8.97918	12.024	13.4302	8.29848		13.4663		10.1151	12.3747	13.1755	11.4154		12.1768			11.5456	0.581243
3471.51	9.15741	12.3273	13.7182	8.4978		13.7649		10.3556	12.7311	13.4053	11.6692		12.4388			11.8066	0.593118
3517.83	9.35523	12.6472	14.0099	8.73112		14.0641		10.5742	13.0971	13.6314	11.9076		12.6785			12.0696	0.602935
3564.15	9.56707	12.9336	14.2999	8.9732		14.3579		10.7877	13.4792	13.8571	12.1553		12.9339			12.3345	0.611788
3610.47	9.77266	13.205	14.5752	9.23373		14.6295		10.9692	13.8543	14.0625	12.3805		13.1949			12.5878	0.618999
3656.78	9.92937	13.4422	14.8194	9.48152		14.8649		11.1069	14.2209	14.2575	12.5545		13.3944			12.8072	0.627431
3703.11	10.0087	13.6363	15.0305	9.68157		15.0981		11.2145	14.5774	14.4424	12.6743		13.5106			12.9874	0.641283
3749.42	10.0568	13.7883	15.2199	9.82648		15.3302		11.2883	14.9087	14.6145	12.7594		13.6018			13.1395	0.659275
3795.74	10.1129	13.8782	15.3866	9.93745		15.5656		11.3316	15.2548	14.7921	12.8197		13.6782			13.2757	0.679668
3842.06	10.1702	13.9318	15.5343	10.0224		15.8041		11.3552	15.5679	14.9758	12.8663		13.7294			13.3957	0.70091
3888.37	10.2399	13.9891	15.6797	10.0978		16.0531		11.379	15.8332	15.1657	12.9077		13.7981			13.5143	0.721625
3934.7	10.3113	14.0467	15.8375	10.1871		16.3117		11.4003	16.0715	15.3643	12.9101		13.8776			13.6318	0.742558
3981	10.3732	14.1111	15.991	10.2827		16.5853		11.4217	16.3044	15.566	12.8954		13.9462			13.7477	0.7647
4027.34	10.4319	14.1921	16.1379	10.3736		16.8686		11.4237	16.5351	15.7723	12.8878		14.014			13.8637	0.788633
4073.64	10.4954	14.283	16.2671	10.463		17.1611		11.4189	16.7388	15.9945	12.8874		14.0595			13.9769	0.812283
4119.96	10.5791	14.4	16.4019	10.5538		17.4528		11.4147	16.9151	16.2254	12.8899		14.0701			14.0903	0.834797
4166.3	10.6643	14.5463	16.5534	10.6578		17.747		11.413	17.0883	16.4676	12.8901		14.0466			14.2075	0.858152
4212.56	10.7338	14.7266	16.7065	10.7772		18.0353		11.4123	17.2614	16.7213	12.8942		14.0293			14.3298	0.882335
4258.98	10.8036	14.9331	16.8662	10.9069		18.3177		11.4123	17.3996	16.9808	12.9144		14.0273			14.4562	0.905228
4305.16	10.873	15.1535	17.0374	11.0424		18.6025		11.4122	17.4972	17.2502	12.9546		14.0284			14.5851	0.927515
4351.62	10.9454	15.3879	17.2106	11.1669		18.8806		11.4119	17.592	17.5212	13.0177		14.0291			14.7163	0.950124
4397.84	11.0403	15.6318	17.3788	11.2925		19.1607		11.4136	17.6996	17.7997	13.1012		14.028			14.8546	0.972518
4444.15	11.149	15.8422	17.5553	11.4137		19.4227		11.4349	17.807	18.075	13.2002		14.0366			14.9937	0.992774
4490.64	11.2543	16.0707	17.7328	11.507		19.6365		11.5024	17.9108	18.3407	13.3105		14.0539			15.132	1.00987
4536.58	11.3337	16.3034	17.8991	11.5532		19.8511		11.6238	18.0133	18.6029	13.4403		14.0778			15.2699	1.02726
4583.45	11.4292	16.5146	18.069	11.5938		20.0684		11.7934	18.118	18.8534	13.579		14.1104			15.4129	1.04196
4629.12	11.5111	16.705	18.2284	11.659		20.2916		11.9993	18.2247	19.1046	13.7291		14.162			15.5615	1.05452
4676.1	11.581	16.8712	18.3823	11.7535		20.5331		12.2266	18.3331	19.3375	13.8858		14.2258			15.713	1.06541
4721.85	11.6537	17.023	18.5294	11.879		20.7889		12.4328	18.4398	19.5693	14.043		14.2941			15.8653	1.07614
4767.97	11.7225	17.1673	18.6644	12.0269		21.0555		12.634	18.5481	19.8205	14.2001		14.3721			16.0211	1.08733
4815.29	11.7914	17.302	18.7917	12.2077		21.3213		12.8054	18.657	20.0622	14.3515		14.4642			16.1754	1.09764
4858.48	11.8556	17.421	18.9031	12.3746		21.5865		12.9417	18.7663	20.3089	14.504		14.5666			16.3228	1.10955
4910.88	11.9204	17.5274	18.9601	12.5134		21.8475		13.0425	18.8794	20.5247	14.6535		14.6775			16.4546	1.12098
4946.06	11.9844	17.6388	19.0078	12.65		22.1006		13.1307	18.9937	20.7232	14.8		14.7926			16.5822	1.13191
4952.05	11.9966	17.6618	19.0192	12.6763		22.1513		13.1477	19.0166	20.7631	14.829		14.816			16.6078	1.13427
