# Supplementary material for: How spatial release from masking may fail to function in a highly directional auditory system
Source: eLife. 2017 Apr 25;6:e20731. doi: 10.7554/eLife.20731 (PMC5443663; doi:10.7554/eLife.20731)
Supplement: Figure 3—source data 1. — Data plotted in figure. DOI: http://dx.doi.org/10.7554/eLife.20731.008 [file elife-20731-fig3-data1.xlsx]

## Sheet: Sheet1
	No Noise		Grouped		Separated		Recog. Thres.	No Noise	Grouped	Separated
FlyID	LB	UB	LB	UB	LB	UB
1	50.5	52	59.5	61	59.5	61		51.3144	60.3144	60.3144
2	59.5	61	67	68.5	67	68.5		60.3144	67.8144	67.8144
3	56.5	58	62.5	64	62.5	64		57.3144	63.3144	63.3144
4	53.2	55	62.5	64	64	65.5		54.1926	63.3144	64.8144
5	40	41.5	64	65.5	59.5	61		40.8144	64.8144	60.3144
6	47.5	49	59.5	61	61	62.5		48.3144	60.3144	61.8144
7	49	50.5	61	62.5	61	62.5		49.8144	61.8144	61.8144
8	52	53.5	64	65.5	64	65.5		52.8144	64.8144	64.8144
9	43	44.5	61	62.5	61	62.5		43.8144	61.8144	61.8144
10	50.5	52	67	68.5	68.5	70		51.3144	67.8144	69.3144
11	46	47.5	62.5	64	61	62.5		46.8144	63.3144	61.8144
12	52	53.5	59.5	61	59.5	61		52.8144	60.3144	60.3144
							average	50.8043	63.3144	63.1894
							std	5.43273	2.63715	2.96284
