# Supplementary material for: How spatial release from masking may fail to function in a highly directional auditory system
Source: eLife. 2017 Apr 25;6:e20731. doi: 10.7554/eLife.20731 (PMC5443663; doi:10.7554/eLife.20731)
Supplement: Figure 4—source data 1. — The target signal was presented at 76 dB SPL while the masker intensity was varied to achieve three SNRs (−6, 0, +6 dB). Masker presentation started and ended 0.5 and 4.5 s after the onset of data acquisition, respectively. Signal presentation started and ended 1.0 and 4.0 s after the onset of data acquisition, respectively. Data plotted in Figure 4A (left). DOI: http://dx.doi.org/10.7554/eLife.20731.010 [file elife-20731-fig4-data1.xlsx]

## Sheet: minus6grp
Time	Fly1	Fly2	Fly3	Fly4	Fly5	Fly6	Fly7	Fly8	Fly9	Fly10
9.04816	5.79358e-06	-7.60391e-06	9.73653e-06	-4.07798e-06	-8.10921e-06	9.17686e-06	-6.36436e-06	2.62699e-05	-2.6615e-06	1.07965e-05
20.6654	-4.01405e-06	8.88612e-06	-1.65108e-05	4.12705e-06	4.61731e-06	-7.30683e-06	4.14109e-06	-3.44533e-05	-1.06546e-06	-1.2981e-05
32.0169	1.07041e-07	-7.64185e-06	2.04271e-05	-2.77424e-06	1.92594e-06	2.13663e-06	4.38969e-07	3.4184e-05	5.98349e-06	1.16049e-05
43.516	5.47041e-06	3.24359e-06	-1.89407e-05	-1.00315e-07	-1.05412e-05	5.93166e-06	-6.78269e-06	-2.20206e-05	-1.08956e-05	-5.65381e-06
54.9464	-1.14945e-05	4.11151e-06	1.03049e-05	4.14218e-06	1.91256e-05	-1.5329e-05	1.34411e-05	-2.81767e-06	1.41063e-05	-4.73398e-06
66.3754	1.60757e-05	-1.31248e-05	5.49319e-06	-8.44638e-06	-2.47076e-05	2.33724e-05	-1.82511e-05	3.70699e-05	-1.37978e-05	1.78334e-05
77.8637	-1.70319e-05	2.13833e-05	-2.60033e-05	1.16392e-05	2.4108e-05	-2.67235e-05	1.87819e-05	-7.28672e-05	8.6049e-06	-3.02636e-05
89.2613	1.2518e-05	-2.57249e-05	4.61268e-05	-1.21555e-05	-1.4949e-05	2.22656e-05	-1.30616e-05	9.85182e-05	1.72482e-06	3.74607e-05
100.751	-1.80239e-06	2.30158e-05	-5.87668e-05	8.6983e-06	-3.1916e-06	-8.26999e-06	4.47949e-07	-0.00010094	-1.5779e-05	-3.47563e-05
112.171	-1.40147e-05	-1.12416e-05	5.64379e-05	-7.97827e-07	2.78171e-05	-1.44275e-05	1.75941e-05	6.95863e-05	3.02712e-05	1.89424e-05
123.626	3.16149e-05	-9.33006e-06	-3.36843e-05	-1.06808e-05	-5.31515e-05	4.16426e-05	-3.71161e-05	-1.1403e-06	-4.039e-05	1.00118e-05
135.079	-4.5678e-05	3.52873e-05	-1.01921e-05	2.32777e-05	7.07598e-05	-6.58847e-05	5.20086e-05	-9.63174e-05	4.08194e-05	-4.76217e-05
146.511	4.98782e-05	-5.99355e-05	6.89017e-05	-3.31188e-05	-7.13428e-05	7.75559e-05	-5.5203e-05	0.000201329	-2.73598e-05	8.45443e-05
157.976	-3.8644e-05	7.4232e-05	-0.000128413	3.56606e-05	4.75813e-05	-6.73774e-05	4.07064e-05	-0.00028086	-1.15743e-06	-0.000107767
169.408	9.3935e-06	-6.89218e-05	0.000168549	-2.6975e-05	2.51344e-06	2.97211e-05	-6.11799e-06	0.000296844	4.12002e-05	0.000103556
180.864	3.53247e-05	3.76384e-05	-0.000167375	5.36081e-06	-7.26857e-05	3.39242e-05	-4.5041e-05	-0.000217197	-8.37859e-05	-6.18929e-05
192.307	-8.6565e-05	1.96942e-05	0.000108017	2.71391e-05	0.000147145	-0.000112489	0.000102064	2.93827e-05	0.000115298	-1.85236e-05
203.753	0.000129393	-9.4207e-05	1.3394e-05	-6.38757e-05	-0.000202024	0.000185132	-0.000147745	0.000247084	-0.000120244	0.000126177
215.204	-0.000145529	0.000167406	-0.000180947	9.39582e-05	0.000210226	-0.000224337	0.000161598	-0.000553958	8.58096e-05	-0.000235347
226.645	0.000118254	-0.000213525	0.000356165	-0.000104232	-0.000149413	0.000202607	-0.000125557	0.000798164	-7.40756e-06	0.000309035
238.098	-3.88276e-05	0.000205355	-0.000481845	8.28705e-05	1.16828e-05	-0.000101963	3.12046e-05	-0.000869352	-0.000106305	-0.00030702
249.541	-8.71722e-05	-0.000123009	0.000493987	-2.40072e-05	0.000187674	-7.58795e-05	0.000113303	0.000670757	0.000230888	0.000198376
260.989	0.000235794	-3.61883e-05	-0.000341041	-6.77355e-05	-0.000405747	0.000301881	-0.000279168	-0.00015821	-0.000327969	2.39922e-05
272.436	-0.000365304	0.00024957	6.84343e-06	0.000174456	0.00057521	-0.000518297	0.000418277	-0.000622834	0.000352679	-0.000330993
283.882	0.000423139	-0.000466274	0.000469201	-0.000265612	-0.000617266	0.000646622	-0.000471646	0.00151581	-0.00026636	0.000652325
295.331	-0.000359437	0.000612878	-0.000982711	0.000303318	0.000463992	-0.000605954	0.000385014	-0.00226068	5.23428e-05	-0.00088348
306.776	0.000145254	-0.000609212	0.00137318	-0.000252368	-8.6403e-05	0.000339732	-0.000129258	0.00253975	0.000269309	0.000907272
318.224	0.000208796	0.00039336	-0.00145524	9.34346e-05	-0.000479019	0.000154857	-0.000279065	-0.00206154	-0.000633385	-0.000628521
329.67	-0.000639521	4.88878e-05	0.00107086	0.000163857	0.00111529	-0.0008036	0.000763673	0.000670528	0.00093272	1.57088e-05
341.117	0.00103051	-0.00065839	-0.000153811	-0.000472428	-0.00163165	0.00144831	-0.00118828	0.0015421	-0.00103643	0.000861236
352.564	-0.00122941	0.00129222	-0.00120817	0.000748385	0.00179959	-0.00186485	0.00137699	-0.00416062	0.000823652	-0.00181077
364.011	0.00108501	-0.0017413	0.00273207	-0.00088398	-0.00141809	0.00181081	-0.00116091	0.0064393	-0.000231195	0.00253155
375.458	-0.000502121	0.00177888	-0.0039462	0.000772461	0.000394685	-0.00110253	0.000446302	-0.00741676	-0.00069537	-0.00267052
386.905	-0.000498935	-0.00123263	0.00427338	-0.00034404	0.00118123	-0.000291695	0.000712196	0.00617966	0.00176348	0.00193053
398.352	0.00173653	5.0968e-05	-0.00321521	-0.000393701	-0.00300546	0.00216726	-0.00207611	-0.00225835	-0.00264725	-0.000212129
409.799	-0.00287204	0.00163002	0.000585235	0.00131294	0.00457206	-0.00405922	0.00324242	-0.00400464	0.00295578	-0.00227033
421.245	0.00348283	-0.00343012	0.00329741	-0.00215128	-0.00525227	0.00529744	-0.00372139	0.011268	-0.0023114	0.00494263
432.692	-0.00313521	0.00496446	-0.00733884	0.00258262	0.00451075	-0.00513407	0.00327209	-0.0171483	0.00070645	-0.00688824
444.139	0.00168259	-0.00561452	0.0101677	-0.00220103	-0.00187942	0.00322009	-0.00183172	0.019499	0.0015938	0.00731613
455.586	0.000859846	0.00478904	-0.0106607	0.000898561	-0.00264772	0.000338644	-0.000335544	-0.0172722	-0.00376722	-0.0057745
467.033	-0.0039678	-0.000816254	0.00962181	0.00127147	0.00892991	-0.00464103	0.00403319	0.0117743	0.00605608	0.00258495
478.48	0.0071715	-0.00704581	-0.00770502	-0.0033674	-0.0149128	0.0096235	-0.0104308	-0.000978216	-0.0103618	0.00299574
489.927	-0.0123318	0.00734466	-0.00531905	0.00348302	0.0143747	-0.016104	0.0108438	-0.0279578	0.00559292	-0.0140158
501.374	0.00884534	-0.0220119	0.00937457	-0.00849637	-0.0165816	0.0127738	-0.0212788	0.0415685	-0.0118919	0.0175278
512.821	-0.0129484	0.0138355	-0.0335675	0.00262254	-0.0025377	-0.0202063	0.0100656	-0.0861992	-0.00389842	-0.0316704
524.267	-0.00555223	-0.0246481	0.0426085	-0.0121088	0.00587914	0.00549199	-0.0112554	0.0969091	-0.00518089	0.0281879
535.714	0.0223743	-0.0176095	-0.0930439	-0.000555048	-0.0464751	-0.0104746	-0.0325692	-0.151697	0.0116471	-0.0410717
547.161	0.0533087	0.399587	0.375256	0.0399712	0.13216	-0.0179518	0.401504	0.203569	0.514692	0.0335486
558.608	0.456416	1.22189	1.23399	0.267771	0.562494	0.515893	0.884352	1.98974	1.07012	0.654782
570.055	0.904181	1.81248	1.27452	0.85484	1.16804	1.04222	1.32624	2.42105	1.50668	1.00353
581.502	1.2719	1.97109	1.67766	1.21942	1.62075	1.58039	1.89208	2.64904	2.16073	1.23192
592.949	1.70503	2.64082	2.14413	1.69122	2.48202	2.01249	2.02724	3.61822	2.7327	1.55845
604.396	2.07727	3.11024	2.36095	2.39867	2.76115	2.29588	1.9505	3.87923	3.22746	2.01021
615.842	2.43949	3.06756	2.9446	2.78936	2.01339	3.15385	2.20904	4.23345	3.55477	2.55432
627.289	2.76219	3.30149	3.01743	3.50983	2.28864	3.58891	2.02638	4.69831	3.84612	2.77688
638.736	3.22856	3.29621	3.2702	4.01608	2.79405	3.83107	1.82206	5.02349	4.35051	3.11047
650.183	3.60538	3.37095	3.64597	4.09056	3.50862	4.40172	2.3413	5.77378	4.76176	3.49541
661.63	3.76441	3.47585	3.47388	4.59727	3.67804	4.66524	2.33182	6.32751	5.07454	3.65705
673.077	3.96936	3.1914	3.74498	4.90522	3.73425	4.93858	2.04412	6.60876	5.35352	3.8322
684.524	4.14586	3.17377	4.05687	4.96303	4.9086	5.07017	2.01919	6.47409	5.53346	3.88661
695.971	4.42619	3.18322	4.05983	5.24574	4.78947	5.29076	1.88009	6.31868	5.85743	3.91634
707.418	4.86481	3.22566	3.93987	5.30355	4.68944	5.54715	1.80287	7.03429	6.016	4.19142
718.864	5.05954	3.40795	4.19391	5.38155	4.91518	5.48686	1.76783	6.70104	5.96773	4.50537
730.311	5.12896	3.40581	4.33974	5.43123	5.10933	5.86948	1.724	7.04124	6.36782	4.78753
741.758	5.46936	3.55296	3.9551	5.13715	5.37985	5.85959	1.55733	8.2158	6.55341	4.67019
753.205	5.57282	3.60721	4.42975	5.48209	4.97455	5.59457	1.28104	7.56699	6.60217	4.41321
764.652	5.44811	3.58498	4.1134	5.681	5.53636	6.18403	1.12492	7.55382	6.86067	4.7064
776.099	5.51214	3.65641	3.5039	5.40257	5.21204	6.20256	1.25634	8.05347	6.65232	4.77659
787.546	5.57855	3.55542	4.15587	5.48577	4.68394	6.06665	1.23181	7.95108	6.80606	4.76989
798.993	5.60814	3.52698	3.86745	5.61409	4.79267	6.44793	1.06885	7.80982	6.97073	4.81078
810.44	5.28801	3.43956	3.43866	5.74795	3.75089	6.18328	1.08002	7.85526	6.83436	4.62875
821.886	4.82257	3.36371	3.56573	5.08925	4.22213	6.08204	1.03849	8.18389	6.96893	4.61736
833.333	4.63314	3.24556	2.98175	5.04491	4.67582	6.50851	1.12348	8.31584	6.7387	4.51736
844.78	4.42883	2.98989	2.78552	5.65653	4.14248	6.34201	0.933623	8.52086	6.82593	4.69204
856.227	4.25528	3.14875	2.80685	5.33734	4.25739	6.36233	0.960709	8.23063	6.93301	4.79714
867.674	4.3774	3.1584	2.14033	5.42548	3.80269	6.32898	1.23485	8.03357	6.63113	4.63823
879.121	4.42501	3.12674	2.49502	5.2712	3.36807	5.81625	0.944591	8.24572	6.69333	4.5441
890.568	3.90731	3.20303	2.47828	4.89299	3.12264	5.84184	0.899309	8.12978	6.4904	4.29131
902.015	3.49526	2.85065	1.9342	4.89301	2.59844	5.61423	0.944613	7.97725	6.10944	4.19649
913.462	3.33699	2.82543	1.98361	4.55266	2.10398	5.56418	0.880682	7.41744	5.89556	3.9013
924.908	3.55917	2.96744	1.433	4.37026	1.83834	4.79771	0.805298	7.46047	5.71337	3.5304
936.355	4.33215	2.96341	1.55369	4.17944	1.73717	3.94906	0.792535	7.70591	5.59643	3.21565
947.802	4.42898	3.08167	1.60063	3.90181	1.36471	4.39214	0.973765	7.54879	5.06791	2.82366
959.249	4.14648	2.97574	1.6246	3.50419	1.32823	3.87934	0.978631	7.41401	4.49875	2.24894
970.696	3.87935	2.92705	1.26842	3.08902	1.40659	3.88771	1.17853	6.87303	4.1679	1.2404
982.143	3.68862	3.00123	0.221241	2.92226	1.10583	3.8081	1.12166	7.06062	3.48794	0.79144
993.59	3.85981	2.92542	1.27963	2.64305	0.740656	3.18975	0.955298	7.32227	2.82545	0.303813
1005.04	3.24138	2.93822	2.07277	2.55791	0.254267	3.3331	1.02135	6.78075	2.27283	-0.328026
1016.48	2.79808	3.01544	2.17395	2.55872	0.0645636	3.25729	0.705459	6.48286	1.8008	-0.23789
1027.93	3.00102	2.92272	2.49395	2.5279	0.0132451	3.46703	0.918828	6.25678	1.92369	-0.441237
1039.38	2.67636	2.86869	2.45808	2.41855	0.0311621	3.10526	1.22339	6.23557	1.9409	-0.66954
1050.82	2.68065	2.89453	2.74815	2.31452	0.105352	3.05843	1.07394	6.44817	1.85595	-0.534209
1062.27	2.63533	2.78075	2.76976	2.44158	-0.168134	3.276	1.25644	5.91058	2.07869	-0.56382
1073.72	2.69123	2.85804	2.9088	2.20447	-0.341399	2.85627	1.11171	5.58379	2.02353	-0.551067
1085.16	2.76937	2.89257	2.6431	2.34578	-0.290929	3.05963	0.709454	5.517	2.10276	-0.377808
1096.61	2.11258	2.73005	2.52213	2.37044	0.282596	2.90714	0.812242	5.03759	2.30994	-0.300413
1108.06	1.85353	2.8119	2.78766	1.76479	0.747935	2.89474	1.10829	5.10335	2.25487	-0.0342195
1119.51	1.6022	2.86415	2.76008	2.07995	0.722029	2.98998	0.916825	5.30523	2.30938	0.167116
1130.95	1.5276	2.84437	2.92638	2.46087	1.07486	2.77554	0.721797	5.05859	2.36143	-0.0984634
1142.4	1.67217	2.82676	2.96761	2.47414	0.956489	2.95473	0.93406	3.78625	2.34343	-0.00970328
1153.85	1.37094	2.85476	2.74216	2.56048	0.557746	2.85402	0.853017	3.46157	2.29606	0.137487
1165.29	1.37673	2.83229	2.77313	2.43425	0.502335	2.78761	0.871904	4.34806	2.30295	0.0203754
1176.74	1.32148	2.81114	3.05554	2.51479	0.46674	2.7504	0.907043	4.00351	2.30419	-0.00701343
1188.19	1.11146	2.69161	1.59273	2.67414	0.570568	2.44599	0.774207	3.84854	2.04213	-0.00239691
1199.63	1.22176	2.38672	0.945203	2.82864	0.143552	2.32017	0.975154	3.71961	2.00107	0.108039
1211.08	1.20578	2.73797	2.35388	2.96663	-0.150119	2.50418	1.09478	3.50006	2.14103	0.050137
1222.53	1.16378	2.79691	2.32955	2.93573	-0.190107	2.38473	0.919214	3.75057	2.02567	-0.0288771
1233.97	1.05326	2.45442	2.16275	3.04241	-0.252162	2.2836	0.869425	3.53373	1.95383	0.0184736
1245.42	0.919937	2.793	2.09603	3.13705	0.023512	2.16266	1.08103	3.49461	1.95796	-0.0110712
1256.87	0.981457	2.81393	1.58832	2.97655	-0.129791	1.63656	1.19387	3.56411	1.72294	0.00441806
1268.31	0.78038	2.75752	1.55214	3.07602	-0.177351	1.62726	1.1977	3.32184	1.24056	0.00084603
1279.76	0.648479	2.975	1.45815	3.35388	0.0616146	1.44426	1.0988	3.19517	0.924557	-0.00470105
1291.21	0.553627	2.80776	1.1703	3.30908	0.152175	1.18441	1.19351	3.08222	0.7037	0.00581088
1302.66	0.326684	2.75775	0.866909	3.28931	0.291907	1.0027	1.09405	2.92071	0.470814	-0.0055415
1314.1	0.407302	2.74828	0.794129	3.30011	0.343896	0.628301	0.721048	3.1875	0.432714	0.0042474
1325.55	0.420103	2.61237	0.992546	3.22591	0.0909763	0.721827	0.937553	3.10212	0.361408	-0.00231463
1337	0.430638	2.79119	0.824	3.34416	0.221201	0.575528	0.935591	2.49657	0.436333	0.000300412
1348.44	0.536704	2.68663	0.85203	3.20292	0.597246	0.369306	1.08115	2.60355	0.614636	0.00131569
1359.89	0.459678	2.39343	0.943958	2.91843	0.650032	0.339164	1.33432	2.47856	0.626666	-0.00227361
1371.34	0.397686	2.37529	0.373603	2.87317	1.01646	0.0739491	1.10184	2.50232	0.566655	0.00254233
1382.78	0.369912	2.25208	0.612211	2.79179	1.06913	-0.228363	1.13043	2.61117	0.493929	-0.00222865
1394.23	0.417877	2.2614	0.57033	2.64198	0.726234	-0.436039	0.977432	2.10012	0.497145	0.00149004
1405.68	0.573432	2.12028	0.495182	2.37788	1.02086	-0.489842	0.916728	2.23008	0.481275	-0.000482359
1417.12	0.656353	1.93937	0.885619	2.15819	1.14688	-0.499748	1.13774	2.18214	0.461175	-0.000641252
1428.57	0.494982	2.03612	0.522902	1.90743	1.05256	-0.444627	1.0667	2.22026	0.448286	0.00173479
1440.02	0.507798	1.93868	0.995411	1.61777	1.07339	-0.355494	1.03828	2.55257	0.44268	-0.00247466
1451.47	0.836813	1.88466	0.531673	1.31921	-0.103026	-0.204039	1.20007	2.30986	0.247845	0.00246682
1462.91	0.682265	1.7473	-0.125408	1.28677	-0.245991	-0.0842803	1.32802	2.42548	0.226519	-0.00128862
1474.36	0.611618	1.84797	0.338499	1.03241	1.57436	0.0759512	1.35986	2.73662	0.476047	-0.000243699
1485.81	0.79186	2.00322	-0.101233	0.399059	1.69853	0.489828	1.43271	2.46955	0.383646	-0.000915057
1497.25	0.834717	1.91642	-0.172714	0.757604	1.6248	0.651998	1.4688	2.40315	0.526713	-0.00265315
1508.7	1.06002	1.98383	-0.474199	0.641076	2.13794	0.733901	1.15532	2.56568	0.558325	-0.00147556
1520.15	1.05673	1.77989	-0.889138	0.1996	1.53889	0.751901	1.02979	2.40861	0.354796	-0.00277234
1531.59	1.15585	2.02811	-0.398498	0.848525	2.44208	0.708164	1.33557	2.55104	0.671885	-0.00489571
1543.04	1.18853	2.11391	-0.377932	0.972821	2.45604	1.1258	1.32423	2.63248	0.733618	0.0255261
1554.49	1.21973	1.93296	-0.353841	0.854982	1.51869	1.26669	1.29329	2.69225	0.756532	0.397239
1565.93	1.50626	2.32947	-0.138604	1.02184	2.1049	1.26107	1.2192	2.71928	0.962239	0.720976
1577.38	1.40651	2.04725	-0.284525	1.08847	1.12538	1.28344	1.19596	2.70538	0.861648	0.631432
1588.83	1.52436	2.09379	-0.180178	1.10829	1.26167	1.20998	1.49473	3.03914	0.913155	0.90323
1600.27	1.60382	2.54511	0.0374161	1.03369	2.18823	1.29585	1.18691	2.88072	1.02493	1.07701
1611.72	1.66661	2.41472	0.239675	1.12104	2.19992	1.31288	1.04957	3.0295	1.16427	0.991918
1623.17	1.64035	2.45772	0.62946	0.98717	2.77498	1.31705	1.32103	3.00702	1.28322	1.29002
1634.62	1.52234	2.48005	0.656193	0.946188	1.64361	1.0779	1.42247	3.16942	1.16533	1.31375
1646.06	1.79022	2.52458	0.778699	1.12939	1.48753	1.5322	1.48431	3.03469	1.18168	1.52029
1657.51	1.58804	2.45344	1.22883	0.944929	2.20007	2.0993	1.3854	1.90381	1.26452	1.75714
1668.96	1.78158	2.43814	1.3233	0.873159	2.20013	1.86438	1.52348	2.68981	1.24881	1.59036
1680.4	1.29154	2.69233	1.50361	0.922869	2.38325	2.14169	1.46786	2.69321	1.11711	1.69623
1691.85	0.622299	2.64314	1.85747	0.972626	0.693889	2.32942	1.29712	2.46206	0.964098	1.74216
1703.3	1.6032	2.6649	1.69133	1.07458	1.17349	2.36992	1.31876	3.52845	0.945879	1.89591
1714.74	1.78694	2.80188	1.38254	1.12396	2.97306	2.64094	1.34738	3.10077	0.775116	1.96338
1726.19	1.42099	2.97172	1.5329	1.24954	2.71313	2.83797	1.49365	3.12873	0.612654	1.98663
1737.64	1.45263	3.16396	1.30359	1.30447	2.75984	3.10596	1.48699	3.39757	0.635085	2.04312
1749.08	1.58606	2.97039	1.28068	1.39211	2.47214	2.89189	1.54897	3.05371	0.638588	1.50204
1760.53	1.45723	3.03581	1.48454	1.41638	2.54213	2.71075	1.65615	3.38906	0.626634	1.43346
1771.98	1.29538	3.17809	1.14673	1.51263	3.18099	2.79175	1.69661	3.64477	0.59372	1.35943
1783.42	1.68716	3.34886	1.12399	1.61061	3.46015	2.79385	1.43532	3.45795	0.615771	0.96687
1794.87	1.58786	3.55632	0.58217	1.59075	3.35206	2.98492	1.23838	3.57367	0.589054	0.834747
1806.32	1.4488	3.26495	0.374754	1.75637	3.3883	3.05852	1.55278	3.85241	0.687534	0.213638
1817.77	1.51588	3.51946	0.590122	1.73013	3.99144	3.1252	1.6969	3.85993	0.909389	-0.27474
1829.21	1.02181	3.52075	-0.129275	1.83796	3.47219	3.32879	1.57292	3.67836	0.727805	-0.678587
1840.66	0.82535	3.25222	-0.14057	1.80091	3.43553	3.4435	1.30697	3.89611	0.790203	-0.706016
1852.11	1.16219	3.47253	-0.183638	1.56142	4.06879	3.33938	1.06042	4.16623	0.985865	-0.389189
1863.55	1.30448	3.34251	-0.393184	1.6547	3.56911	3.1212	0.800761	3.91278	0.980037	-0.529188
1875	1.05494	3.44298	0.0431711	1.53819	3.64948	3.09604	0.757116	4.17212	1.24787	-0.358221
1886.45	0.908129	3.64538	-0.00306404	1.63334	3.87261	3.22354	0.884906	3.0267	1.28042	-0.115789
1897.89	0.984203	3.64653	-0.020682	1.45786	3.95734	3.1096	0.808063	1.19172	1.24288	0.00688338
1909.34	0.844012	3.74411	0.0306199	1.19427	4.02285	2.80497	1.01202	2.87906	1.42802	0.187946
1920.79	0.9274	3.99102	-0.0314014	1.52541	3.69013	3.04495	1.10528	4.6625	1.46136	0.212307
1932.23	0.971264	4.18836	0.0271015	1.36982	4.10875	2.93848	1.07056	4.23334	1.43024	0.163867
1943.68	0.772043	4.19418	-0.0178264	1.48302	4.15406	2.60698	1.42663	4.32973	1.44932	0.122908
1955.13	0.796759	4.36266	0.00553484	1.48826	4.01377	2.92998	1.5081	4.80495	1.48576	0.280127
1966.58	0.774111	4.28954	0.00522992	1.37268	4.30071	2.61638	1.40211	4.47615	1.53273	0.366904
1978.02	0.702794	4.34008	-0.0274883	1.59568	4.02882	2.45022	1.3275	4.41617	1.55642	0.258536
1989.47	0.660663	4.41252	0.163446	1.03008	3.87664	2.63035	1.04027	4.95843	1.61759	0.269238
2000.92	0.629056	4.37318	0.193418	1.26056	3.94477	2.27864	0.948786	4.67598	1.60777	0.210222
2012.36	0.633842	4.70888	0.0963891	1.5961	4.11863	2.32652	0.93633	4.96154	1.60981	0.216736
2023.81	0.453899	4.56957	0.357004	1.48068	3.97	2.01132	0.834414	5.07999	1.78492	0.286654
2035.26	0.318626	4.69106	0.267452	1.8758	3.62636	1.7119	0.6806	4.8092	1.89657	-0.0437362
2046.7	0.367207	4.96174	0.07896	1.77417	3.93402	2.41331	0.552047	5.51965	1.94371	-0.036643
2058.15	0.313131	4.71684	0.245554	1.82347	3.91717	2.76668	1.05265	5.23548	2.03803	0.161442
2069.6	0.160433	5.25426	0.350115	1.83677	3.87178	2.54343	1.17132	5.62848	2.13354	-0.0285323
2081.04	0.16135	5.18979	0.627723	1.85184	3.97213	2.22889	0.974514	5.34357	2.16891	0.00311025
2092.49	0.232728	4.61712	0.66355	2.0648	3.93814	2.19932	1.1113	4.28929	2.22427	0.013735
2103.94	0.206651	5.37473	0.900776	1.9376	3.92695	2.2555	0.566053	5.16914	2.16357	-0.0693173
2115.38	0.297311	5.72276	1.07897	2.08607	3.68308	2.31287	0.697955	4.47704	1.93066	-0.112985
2126.83	0.286969	5.76663	0.763638	2.09653	4.142	2.63442	1.149	3.72764	1.80049	-0.103216
2138.28	0.196739	6.23891	1.00631	2.13465	3.9869	2.74277	1.0617	3.48707	1.57372	0.00656482
2149.73	0.261361	6.3331	1.0755	2.33046	3.51876	2.81757	1.39547	2.60292	1.46014	-0.106146
2161.17	0.0860628	6.44552	0.942914	2.2904	3.89489	3.16726	1.36842	2.63738	1.36864	-0.0550931
2172.62	0.0816786	6.53322	1.34002	2.39081	3.682	3.25739	1.13034	2.45384	0.994672	0.0311897
2184.07	0.367155	6.73918	1.27802	2.47647	3.8532	2.93461	1.23796	2.14722	0.928025	-0.0297181
2195.51	0.387507	6.90873	1.01169	2.5662	4.27866	3.02029	1.46948	1.91914	1.03048	0.106819
2206.96	0.41021	7.01886	1.12432	2.52801	4.20531	3.23116	1.71183	1.96949	1.13086	0.0707751
2218.41	0.440706	7.15382	1.03118	2.41734	4.21557	3.37947	1.89324	2.21971	1.28041	-0.0443699
2229.85	0.395918	7.13465	1.25647	2.41936	4.44462	3.82702	1.61426	2.08896	1.3502	0.0401175
2241.3	0.495346	7.7219	1.28064	2.38399	4.72456	3.84531	1.48941	2.37437	1.44041	0.0994829
2252.75	0.587222	7.77569	1.22493	2.39161	4.85388	4.14806	1.52927	2.7005	1.52739	0.0345969
2264.19	0.486094	7.2801	1.99922	2.30551	5.02194	4.83585	1.22163	2.70162	1.66716	-0.0313024
2275.64	0.388176	7.73278	1.88613	2.17778	4.9436	5.06793	2.00249	2.83218	1.70277	0.0250048
2287.09	0.455203	7.95346	1.21072	1.98889	4.94899	5.29504	2.28855	2.46743	1.53256	-0.0213733
2298.53	0.559388	7.85586	1.20012	1.92864	5.17386	5.35643	1.61374	2.41338	1.43939	-0.12325
2309.98	0.548906	8.03801	1.31784	1.93887	5.05817	5.65484	1.84173	2.33843	1.41246	-0.0108759
2321.43	0.552884	8.08976	1.24271	2.12381	4.60109	6.06283	2.14186	-0.0945315	1.34046	0.00123004
2332.88	0.563274	8.18951	1.30796	2.20679	4.29477	6.08118	2.17919	-0.344223	1.31895	-0.00622878
2344.32	0.498853	8.19702	1.56694	1.35016	4.39236	6.15252	2.10769	2.52616	1.28876	0.229334
2355.77	0.543186	8.09402	1.5256	1.47251	4.43096	6.05733	2.30972	3.3097	1.24953	0.369409
2367.22	0.441838	8.11482	1.52245	2.21436	4.16692	5.87542	2.53169	3.21612	1.29768	0.388528
2378.66	0.225417	8.03351	1.47475	1.9491	3.9897	5.53594	2.52859	3.94816	1.33812	0.551878
2390.11	0.20591	7.98768	1.44575	2.06943	4.36605	5.25754	2.80996	3.66894	1.37571	0.815602
2401.56	0.209433	8.29559	1.58513	2.30209	4.55699	5.06198	2.6331	1.93809	1.37848	1.02558
2413	0.108855	8.37552	1.35078	2.36083	4.16853	5.19255	2.47955	2.3902	1.35287	1.2053
2424.45	-0.0250574	8.19325	1.19782	2.47384	4.47212	5.32163	2.63757	4.34704	1.50201	1.31476
2435.9	-0.0993871	8.15987	1.33422	2.34313	5.02868	4.86113	2.47002	4.67877	1.49405	1.26331
2447.34	-0.09506	7.85118	1.27967	2.47941	5.50817	5.14147	2.40148	4.77943	1.41448	1.39338
2458.79	-0.0476217	7.61524	1.25827	2.76003	5.60496	5.07423	2.12974	4.80423	1.50274	1.66938
2470.24	-0.0670201	7.72258	1.02958	2.93895	5.49154	4.59252	1.53039	5.07938	1.40068	1.64441
2481.68	-0.0187879	7.86207	0.830598	3.00969	5.98467	4.53498	1.69973	5.30669	1.37427	1.58666
2493.13	0.0965718	7.71158	1.25691	2.95238	4.722	4.22355	2.09285	5.28664	1.3431	1.39375
2504.58	0.0978497	7.31601	1.3518	3.05556	4.53026	4.21636	1.66533	6.05253	1.27593	1.01902
2516.03	0.109697	7.22802	1.42772	2.78491	6.40671	3.98579	1.67583	5.45889	1.29335	0.852276
2527.47	0.208081	7.22853	1.5753	2.58922	5.8363	3.98154	1.87232	5.03795	1.13094	0.570089
2538.92	0.234369	7.20621	1.35258	3.05872	5.28227	4.08047	1.69517	5.8873	1.12801	0.257819
2550.37	0.3852	6.99093	1.39891	3.16329	5.5677	3.57439	1.77517	6.3251	1.08588	0.0377146
2561.81	0.684142	6.8297	1.25762	3.04314	5.20613	3.59808	1.82434	6.51984	1.03262	-0.304101
2573.26	0.601882	6.783	1.40941	3.20094	5.02459	3.62961	1.6836	5.87967	1.17757	-0.618552
2584.71	0.671071	6.70401	1.52429	3.28135	4.75529	3.65055	1.11478	6.10315	1.07873	-0.608875
2596.15	0.815151	6.61232	1.12008	3.04811	4.60618	3.97299	0.479679	6.53452	1.07897	-0.544598
2607.6	0.450521	6.28303	1.21372	3.10867	4.67238	3.84145	0.667656	6.18817	1.14962	-0.662947
2619.05	0.595526	6.41476	1.27598	3.3196	4.64957	3.92685	1.56259	6.28199	1.11599	-0.416516
2630.49	0.886395	6.24495	1.24626	3.27031	4.45608	3.99335	1.68082	6.27882	1.12914	-0.344497
2641.94	0.686925	5.91505	0.963088	3.36922	4.49579	3.70926	1.42024	6.5899	1.03655	-0.292146
2653.39	0.802217	6.02844	0.91514	3.25005	4.64049	3.78828	1.90132	6.56284	1.06294	0.0187972
2664.84	0.923725	5.4489	1.29286	3.43757	4.31144	4.03226	1.56745	6.14016	1.0965	0.0889441
2676.28	0.863182	5.29844	1.0287	3.66743	4.08623	4.38496	1.35897	6.07641	1.08043	0.344954
2687.73	1.00795	5.45165	1.1476	3.29961	4.22256	4.38965	2.00151	6.09175	1.14015	0.532485
2699.18	0.887838	5.22963	1.11072	3.3917	4.2773	4.56865	2.06836	6.35102	1.15668	0.837156
2710.62	0.891902	5.34758	0.880854	3.48832	4.25486	4.73858	2.03291	6.11065	1.16046	1.24469
2722.07	1.17962	5.06856	1.1679	3.46789	4.15081	4.49535	2.12598	5.87419	1.15254	1.55489
2733.52	1.10727	4.93941	0.663617	3.44806	4.15506	4.73113	2.21526	6.24493	1.20186	1.86281
2744.96	1.27818	4.91685	1.04147	2.99438	4.43224	4.42768	2.13822	6.10104	1.24045	1.76612
2756.41	1.38051	4.72421	1.68595	3.06519	4.4297	4.41692	2.20005	5.74377	1.29145	1.97578
2767.86	1.41742	4.81712	0.943745	3.11229	4.3409	4.74989	2.31915	5.11433	1.39696	2.11383
2779.3	1.25516	4.741	0.949622	2.80553	4.46445	4.69588	2.34564	4.26955	1.37134	1.93156
2790.75	0.870355	4.51431	1.12301	2.77394	4.25238	4.72126	2.38309	3.75412	1.31225	2.08237
2802.2	1.47567	4.12608	1.08657	2.59802	4.34693	4.53948	2.41081	3.43886	1.36187	2.13532
2813.64	1.69629	4.12792	1.16874	2.39826	4.7854	4.59202	2.56419	3.32228	1.37755	2.21456
2825.09	1.53225	4.34981	0.935868	2.57249	4.90033	4.36824	2.49897	3.30894	1.38899	2.25616
2836.54	1.55318	4.38621	1.05123	2.90813	5.00254	4.5511	2.6043	3.37374	1.42503	2.29337
2847.99	1.30464	4.37191	0.992261	2.90202	4.98952	4.44126	2.50922	3.13965	1.38445	2.1391
2859.43	1.2734	4.14827	0.847306	2.76534	5.16592	4.36806	2.39507	3.13234	1.39552	1.7834
2870.88	1.01544	4.19631	0.89826	2.83724	5.39902	4.5326	2.51994	3.37112	1.42409	1.70242
2882.33	1.11849	4.27692	0.94305	3.19565	5.42577	2.47681	2.26739	3.47943	1.46408	1.29731
2893.77	1.28944	4.30717	1.08925	3.48219	5.58065	2.38292	2.50778	3.59323	1.52953	0.729585
2905.22	0.884701	4.44235	0.902413	3.54364	5.60705	3.574	2.70649	3.28583	1.51968	0.380134
2916.67	1.10321	4.33507	0.825307	3.81432	5.77637	2.57563	2.42749	3.40539	1.56505	0.0212344
2928.11	1.40759	4.38429	0.925308	3.63692	6.0408	1.76513	2.6445	3.44062	1.57124	-0.304048
2939.56	1.29632	4.37163	0.964214	3.60854	6.21256	1.50651	2.79964	3.41764	1.57139	-0.336142
2951.01	1.34297	4.26379	1.01061	3.67656	6.54578	1.48123	2.73922	3.85976	1.6328	-0.287789
2962.45	1.43724	4.349	0.966755	3.50767	6.43236	1.60922	2.75823	3.36794	1.57859	-0.322704
2973.9	1.52956	4.18025	1.1371	3.66619	6.33079	1.6379	2.56114	3.19989	1.51062	-0.265916
2985.35	1.55668	4.15458	1.38891	2.88832	6.65184	1.13416	2.35297	3.688	1.47012	-0.242981
2996.79	1.64623	4.42802	1.41401	2.61088	6.70633	1.08794	2.19373	3.68253	1.47306	-0.225598
3008.24	1.70521	4.27096	1.26578	3.00066	6.94817	1.05044	2.46997	3.65164	1.50892	-0.164768
3019.69	1.65271	4.08317	1.41721	2.77107	6.57616	0.780042	2.36909	3.9672	1.40555	-0.198846
3031.14	1.5314	4.08944	1.52205	2.75844	6.34782	1.26418	1.68722	4.02952	1.33054	-0.194758
3042.58	1.36049	4.04038	1.28783	2.66698	6.95197	1.49248	1.46957	3.84016	1.38186	0.0757744
3054.03	1.59646	4.15747	1.40307	2.72955	6.84296	1.72431	1.699	4.21502	1.45746	0.0553059
3065.48	1.83733	4.04351	1.33552	2.7457	7.05014	1.52902	2.03384	4.15737	1.50386	-0.103847
3076.92	1.70222	4.09342	1.04765	2.45776	6.71661	1.67285	1.98561	3.94633	1.47997	0.0446785
3088.37	1.788	4.08914	0.778946	2.38008	6.07896	2.49518	2.05933	4.13597	1.49883	0.118862
3099.82	1.72596	3.82567	0.405462	2.5303	6.43494	2.47444	2.05105	4.13038	1.49247	0.347985
3111.26	1.40692	4.11527	0.411464	2.85252	6.64293	2.51625	2.01291	3.80479	1.53782	0.569184
3122.71	1.4061	4.06738	0.111788	2.85793	6.73328	2.56113	2.11926	4.23931	1.55066	0.626163
3134.16	1.23945	3.96949	-0.271714	2.76769	6.44508	2.69538	1.9515	4.275	1.47353	0.960269
3145.6	1.06222	4.25261	-0.0990736	2.91541	6.52029	3.01095	2.11299	2.16552	1.59414	1.15966
3157.05	1.07079	4.2927	0.033207	2.9659	6.84064	2.95738	2.10365	2.6895	1.64873	1.33743
3168.5	0.938693	4.08748	0.0241612	2.92141	6.51614	3.17332	2.08953	4.33332	1.58071	1.71705
3179.94	0.809406	3.98411	-0.157345	2.96071	6.64869	3.0797	2.05239	3.72164	1.53739	1.83363
3191.39	0.646995	4.17166	-0.129295	2.91701	6.845	3.09661	1.75743	3.95515	1.53515	2.01268
3202.84	0.610631	3.72059	-0.173739	2.65506	6.99353	3.33523	1.85685	4.20301	1.5828	2.2342
3214.29	0.564972	3.68835	-0.231943	2.51294	7.21364	2.97499	1.62624	3.98589	1.48146	2.12576
3225.73	0.368292	4.29913	-0.301726	2.59712	7.05405	3.37331	1.327	4.02125	1.40876	2.26619
3237.18	0.318688	4.1084	-0.399338	2.1852	7.1604	3.26437	1.35478	3.84117	1.35135	2.65068
3248.63	0.426065	4.12656	-0.00205906	1.41237	7.218	2.92424	1.39371	3.78672	1.28527	2.83489
3260.07	0.452273	4.27929	-0.114254	1.03924	7.27119	3.82501	1.62972	3.60662	1.3133	2.95692
3271.52	0.367395	4.20701	-0.204583	1.02477	7.17704	3.82463	1.67854	3.57719	1.27517	2.86557
3282.97	0.430436	4.47265	-0.123339	1.37344	6.62017	3.76195	1.49448	3.73509	1.21231	2.82303
3294.41	0.466694	4.68072	-0.154857	1.67377	6.6445	3.81553	1.63338	3.61153	1.18602	3.15839
3305.86	0.44931	4.78893	0.0999603	1.84151	6.94912	3.56832	1.61018	3.93906	1.21248	3.18376
3317.31	0.441839	4.87096	-0.093608	2.08433	6.34351	3.49222	1.55204	3.92549	1.10896	2.9865
3328.75	0.28749	5.0058	-0.231021	2.21379	5.99803	3.24336	1.73478	3.535	1.04453	3.18196
3340.2	0.337178	5.10839	-0.00395392	2.42071	6.30288	3.29794	1.71354	3.72286	1.11378	3.24091
3351.65	0.384093	5.09382	0.173842	2.50708	5.55037	3.27837	1.88375	3.35384	1.02387	3.08807
3363.1	0.288452	5.3098	0.171078	2.60919	5.63581	3.32155	1.87237	3.26843	1.062	3.31657
3374.54	0.488	5.28427	-0.106561	2.71647	6.59474	3.1949	1.73191	3.59501	1.16482	3.3941
3385.99	0.53406	5.07123	-0.203904	2.75836	6.12986	3.16613	1.83087	3.45312	1.13701	3.24436
3397.44	0.562092	5.09523	-0.0431032	2.97606	5.89219	3.42593	1.9419	3.43883	1.18745	3.37128
3408.88	0.814632	5.18222	0.0675891	3.05147	6.17299	3.3596	2.01084	3.60412	1.25346	3.3812
3420.33	0.289969	5.16201	-0.160263	3.3394	5.91181	3.60771	2.02052	3.85617	1.17904	3.08901
3431.78	0.0853291	5.0425	-0.196859	3.3006	5.8717	3.76953	2.25198	3.51062	1.2348	2.76696
3443.22	0.840445	5.09515	0.0834147	3.15423	6.27309	3.55094	2.30799	3.52964	1.47109	3.04301
3454.67	0.924332	5.03407	-0.148198	3.42171	6.10472	3.53024	2.09631	3.36529	1.36701	3.4249
3466.12	0.90318	5.03309	-0.199416	3.18516	6.10599	3.81127	2.01726	2.28345	1.35381	3.15943
3477.56	1.04943	5.23523	0.0494197	3.09574	6.44224	3.66161	2.12949	2.84936	1.48499	3.20119
3489.01	0.981947	5.18243	-0.0182803	3.26918	6.16403	3.33885	2.09512	3.82795	1.44449	3.28246
3500.46	1.11073	5.0957	0.00128263	3.5297	6.38691	3.66117	2.03982	3.8006	1.60807	3.11062
3511.9	1.07877	4.99592	0.0116233	3.51752	6.26499	3.84134	2.29295	3.8381	1.60787	3.16428
3523.35	1.06718	4.89244	-0.018455	3.3677	5.95861	3.65197	2.10284	4.05115	1.5254	3.0168
3534.8	1.12984	4.89994	0.0211753	3.78944	6.09534	3.51834	2.03494	4.28178	1.5913	2.99849
3546.25	1.12241	4.96964	-0.0186042	3.33627	5.48237	3.44882	2.25119	4.29449	1.57926	2.65971
3557.69	1.34778	5.04728	0.0133048	2.61978	5.59914	3.47201	2.01495	4.25332	1.57652	2.80931
3569.14	1.3913	5.07781	-0.00106407	2.78318	5.87306	3.35737	1.82622	4.27966	1.56234	2.26646
3580.59	1.39406	4.99122	-0.0151285	2.72341	5.83686	2.96176	1.72113	4.13361	1.57005	0.482623
3592.03	1.48389	4.80701	0.0287186	2.5074	5.75447	2.86765	1.87813	3.03497	1.48618	1.52655
3603.48	1.3269	4.93897	-0.0491913	2.68131	5.15007	2.59618	1.93609	2.56252	1.40571	1.76559
3614.93	1.55801	5.15355	0.0593058	2.81654	5.03873	2.08362	1.6201	4.07388	1.4259	0.223694
3626.37	1.64294	5.13287	-0.0894597	2.97123	4.73003	1.85918	1.70429	4.34597	1.3755	0.0496763
3637.82	1.41319	4.83677	-0.299152	3.19403	4.32954	1.50104	1.88744	3.60788	1.3144	-0.694438
3649.27	1.63754	4.76886	0.214545	3.19484	4.08764	1.41672	1.77733	4.14647	1.24206	-1.18157
3660.71	1.67675	5.01727	0.719112	3.27362	3.64346	1.2352	1.51884	2.85097	1.23436	-1.01237
3672.16	1.61561	4.93119	0.820465	3.38506	3.54789	0.847041	1.44319	1.56448	1.18875	-0.706281
3683.61	1.49512	5.00733	0.804788	3.44906	3.31038	0.668912	1.59435	3.59985	1.04768	-0.294316
3695.05	1.45137	5.04061	0.989429	3.33277	3.00867	0.602962	1.56533	4.70312	1.0464	-0.208033
3706.5	1.58331	4.87534	0.84987	3.25271	3.25061	0.710095	1.67391	4.36582	1.08304	-0.174761
3717.95	1.36667	4.96904	0.477517	3.26761	3.39287	0.550594	1.90324	4.19653	1.05688	-0.156306
3729.4	1.4318	5.00033	0.480956	3.09389	3.50406	0.686273	2.02766	4.02902	1.08419	0.0355315
3740.84	1.32592	5.04048	0.263116	3.02205	3.71638	0.778964	1.92267	4.22541	1.03092	-0.0182267
3752.29	1.22431	5.04292	0.0887107	2.91829	3.62805	0.455611	1.89342	4.15778	0.969217	0.073446
3763.74	1.32505	4.88407	-0.00282196	2.77094	3.87481	0.601044	2.36216	3.96957	1.05925	0.2498
3775.18	1.02202	4.93465	-0.022362	2.41582	3.93791	0.622401	2.20761	3.85672	0.951533	-0.0448644
3786.63	1.19322	4.80486	0.296811	2.02238	3.81579	0.419043	1.90705	3.34504	0.829813	0.00312513
3798.08	1.05296	4.7162	0.186523	2.00602	4.13503	0.429217	2.10985	2.92296	0.899913	0.0264658
3809.52	1.1148	4.84411	0.276555	1.99713	4.15182	0.391308	2.45461	2.89628	0.970426	-0.0516732
3820.97	1.37344	4.57047	0.632487	1.82782	4.18789	0.350568	2.66197	2.56955	0.984997	0.15788
3832.42	0.730445	4.71866	0.545383	1.52094	4.37484	0.325148	1.91126	2.07442	0.907887	0.00802062
3843.86	1.03697	5.02226	0.699922	1.52798	4.16332	0.389988	1.99518	1.81587	0.916343	-0.00441277
3855.31	1.19132	5.03123	0.907643	1.76501	3.96285	0.688563	2.68519	1.65932	0.933317	0.0310375
3866.76	0.823065	5.0291	1.01397	1.4497	3.90345	0.780592	2.71064	1.62065	0.897605	-0.239609
3878.21	0.959787	5.00812	1.05952	1.248	3.72531	0.725436	2.94852	1.49258	0.857717	-0.0740042
3889.65	0.681984	5.08079	1.06645	1.49369	3.47961	0.97377	2.76716	1.4866	0.815924	-0.0175851
3901.1	0.696514	5.13111	0.961718	1.48187	3.21376	0.931229	2.37128	1.96963	0.719126	0.0937219
3912.55	0.799294	5.59975	0.796943	1.67402	3.1847	0.875718	1.87164	2.25053	0.595717	0.472255
3923.99	0.778599	5.65295	0.913509	1.89124	2.87095	1.01654	2.1306	2.10655	0.65117	0.701208
3935.44	0.959405	5.57239	0.715533	1.96484	2.4876	0.942775	2.83811	2.41166	0.714876	0.914695
3946.89	0.848112	5.69753	0.59024	2.02949	2.71876	1.19398	2.65711	2.94521	0.736418	0.861475
3958.33	0.896815	5.32857	0.670186	1.90385	2.59424	1.24094	2.56231	3.38173	0.735694	0.938669
3969.78	1.00418	5.80232	0.563753	1.98712	2.40822	1.21618	1.75306	3.86454	0.641749	1.00236
3981.23	0.978634	5.83305	0.720357	1.85092	2.38646	1.44073	1.47109	3.70698	0.639547	1.05899
3992.67	1.04669	5.68063	0.63335	1.91221	2.41004	1.28498	1.93167	3.72968	0.745049	1.37916
4004.12	0.905264	5.93651	0.487387	2.22869	2.72666	1.29797	1.37485	4.2866	0.728035	1.43767
4015.57	0.843125	4.94322	0.675403	2.19027	2.67775	1.31524	1.738	4.70672	0.734972	1.43711
4027.01	0.924382	5.56505	0.471324	2.33797	2.7875	1.26756	1.53032	4.91875	0.779885	1.59489
4038.46	0.947768	6.4249	0.150705	2.40908	3.46928	1.38628	0.531066	4.76055	0.697882	1.61948
4049.91	1.08829	5.60438	-0.00885105	2.34958	3.73994	1.32322	1.19636	4.90485	0.860135	1.62546
4061.36	1.04985	6.01598	0.000618637	2.44564	3.71416	1.32203	1.66086	4.92476	1.02255	1.61861
4072.8	1.00126	5.96032	0.0221446	2.34879	3.77479	1.23618	1.68143	5.22001	0.912385	1.13325
4084.25	1.07377	5.01487	-0.320389	2.26804	3.36757	1.19573	1.38152	5.52841	0.918179	0.804878
4095.7	0.986005	5.30284	-0.365008	2.53533	3.4617	1.26907	1.15462	5.41015	0.981722	0.719472
4107.14	1.04807	5.81348	-0.192755	2.80478	4.25906	1.09038	1.45993	5.93711	1.00689	0.231134
4118.59	0.96633	5.79533	-0.272024	2.73811	4.45317	1.06787	1.14041	5.26894	1.02687	-0.141344
4130.04	0.921243	5.6655	-0.211065	2.6775	4.1105	1.11917	1.22383	4.98734	0.989873	-0.563134
4141.48	1.22373	5.9912	-0.194086	2.80977	4.72953	1.02928	1.67118	5.72694	1.18125	-0.835814
4152.93	1.11092	5.26009	-0.088219	2.85163	4.4636	0.958933	2.10493	5.95329	1.21697	-0.680354
4164.38	1.11238	4.37439	0.251804	3.04855	2.89923	0.869472	2.27242	5.82434	0.974223	-0.643117
4175.82	1.24233	4.91299	0.216735	3.08973	4.33029	0.901657	2.00534	5.33516	1.19455	-0.385244
4187.27	1.0807	4.55184	0.282555	2.98899	5.42868	0.907662	2.11871	6.35023	1.34548	-0.207932
4198.72	1.22677	4.32011	0.487014	2.84809	5.07048	0.773218	1.66013	6.61669	1.21642	-0.163363
4210.16	1.25479	4.47356	0.237562	2.27917	5.3035	0.692877	1.14674	6.42253	1.13684	0.0069328
4221.61	1.10495	4.05805	0.227187	2.23255	4.99912	0.55787	1.13105	6.58296	1.05797	0.00126537
4233.06	1.13231	3.69119	0.0997449	2.12454	5.20151	0.370068	0.751045	5.82856	0.991427	-0.0280233
4244.51	1.14233	3.30134	0.0126364	2.09254	4.36927	0.242028	0.865584	6.33692	0.848702	-0.114787
4255.95	1.07986	3.15339	0.0035858	2.22494	3.31428	0.103286	0.549021	6.86958	0.673019	-0.10815
4267.4	1.1295	2.71141	-0.377911	1.69937	3.25	0.0979066	0.42745	6.96211	0.562884	-0.174281
4278.85	1.26036	2.40781	-0.341787	2.26357	2.76796	0.0533961	0.976598	6.92131	0.565009	-0.242076
4290.29	1.15136	2.14594	-0.514928	2.67788	2.59794	-0.173477	0.139255	6.73845	0.403519	-0.255032
4301.74	1.14615	1.69182	-0.456397	2.76742	2.40421	-0.223331	0.131397	6.92271	0.348005	-0.0937637
4313.19	1.22106	1.41794	-0.203341	3.0107	2.1841	-0.208303	0.657002	6.79431	0.436835	0.585399
4324.63	1.13116	0.951966	-0.432292	2.52938	2.61877	-0.214877	0.242774	7.5803	0.369843	1.05172
4336.08	1.07718	0.955971	-0.373435	2.84286	2.82289	-0.18912	0.316253	7.53202	0.402794	1.22884
4347.53	1.09695	1.02382	-0.324133	2.81637	2.79743	-0.151145	0.261871	6.82545	0.432196	1.413
4358.97	1.21203	0.965421	-0.150777	2.70383	2.94996	-0.0675646	0.163975	7.61901	0.459822	1.50348
4370.42	1.09619	0.961965	-0.0528803	2.95877	3.00105	-0.167313	0.294578	7.71029	0.486208	1.70385
4381.87	0.951718	0.919725	0.0883411	2.74069	2.97601	-0.157503	0.331828	7.4325	0.487848	1.8231
4393.31	0.989635	1.32501	0.219594	3.02324	2.84939	0.0324386	0.300119	7.77667	0.530826	1.86059
4404.76	1.08065	1.38724	0.0285852	2.9159	2.71545	0.0069474	0.389433	7.54684	0.530435	1.64251
4416.21	1.25084	1.31878	0.261708	3.02414	2.89923	-0.0325856	0.67078	7.39667	0.605784	1.51383
4427.66	1.17994	1.51554	0.399342	3.19023	2.75222	0.0799976	0.511387	7.77894	0.624719	1.9405
4439.1	1.14821	1.41404	0.499642	2.7183	2.50606	0.0880003	0.533974	7.32102	0.590148	1.80917
4450.55	1.09348	1.4313	0.335782	2.92684	2.50452	-0.00821661	0.579552	7.31208	0.546131	2.05702
4462	0.858356	1.40184	0.273775	2.6553	2.52346	0.00257897	0.453327	7.76183	0.527506	2.22259
4473.44	0.9347	1.29146	0.650662	2.36016	2.7102	-0.00437687	0.440673	7.56331	0.555415	1.11598
4484.89	0.949334	1.41177	0.262632	2.6939	2.43515	0.00899005	0.175189	7.62642	0.454114	0.409682
4496.34	0.808372	1.32192	0.18765	2.88123	2.53055	-0.0126509	0.241859	7.29618	0.46017	0.418881
4507.78	0.744925	1.23663	0.447231	3.18845	2.78065	0.011149	0.12283	7.25663	0.474821	0.997589
4519.23	0.624745	1.35615	0.244349	3.02744	2.58608	0.00518028	-0.0774916	7.03097	0.396462	0.676297
4530.68	0.522811	1.16105	0.253342	2.93342	2.56079	-0.21894	0.166251	6.79855	0.410548	-0.336613
4542.12	0.441343	0.928598	0.332675	2.98875	2.31675	-0.0963375	0.204726	7.60108	0.420896	-0.551181
4553.57	0.469813	0.88558	0.154668	2.56407	2.18524	0.0536344	0.139086	6.22031	0.335766	-0.872729
4565.02	0.515694	0.503019	0.102207	2.54661	2.23167	-0.0333255	0.169136	5.85402	0.294068	-0.772731
4576.47	0.448574	0.386748	0.188809	2.51934	2.35793	0.0173767	0.228021	7.35134	0.318396	-0.199519
4587.91	0.496149	0.438499	0.0153702	2.10748	2.58738	-0.003665	0.220304	6.30975	0.241939	0.00394254
4599.36	0.573317	0.157317	-0.0467403	1.99074	2.46799	-0.00747222	0.324751	6.15651	0.242152	0.0443224
4610.8	0.534108	0.0706834	0.05096	1.85845	2.25999	0.0180111	0.445962	6.58401	0.287771	-0.137903
4622.25	0.569512	-0.0505961	-0.0364674	1.52345	2.23673	-0.0223369	0.316613	5.84659	0.212826	-0.200458
4633.7	0.550414	-0.0780999	-0.193549	1.05328	2.13758	0.0236483	0.383675	5.86491	0.157459	0.0530654
4645.14	0.512171	0.0225851	-0.113858	0.57737	2.24808	-0.0197827	0.444547	5.78684	0.14571	-0.0159719
4656.6	0.611217	-0.140626	0.0815081	0.183355	2.51037	0.00828831	0.292326	5.34838	0.11587	-0.00991571
4668.04	0.568634	-0.167933	-0.0715087	-0.222822	2.36237	0.0206803	0.387258	4.84807	0.0519792	0.041424
4679.49	0.554832	-0.0171779	-0.223929	-0.363938	2.3941	-0.215268	0.454742	4.40901	0.0150153	-0.0924084
4690.93	0.512889	0.0220402	-0.0279782	-0.376445	2.51639	-0.108759	0.670906	4.13605	0.0649087	0.273239
4702.38	0.367174	0.0689057	0.024709	-0.198442	2.43095	0.0464581	0.838158	3.57365	0.0898077	0.124465
4713.84	0.372326	0.114223	-0.0176254	-0.0577441	2.51995	-0.0243644	0.699044	3.13153	0.0864277	-0.0818046
4725.26	0.251405	0.148806	0.0123121	0.0806588	2.45876	0.0118171	0.86344	2.88619	0.113155	0.26187
4736.73	0.130815	0.196207	-0.00699236	0.463815	2.62801	-0.00384055	0.930308	2.24181	0.1239	0.038393
4748.16	0.066524	0.27301	0.00281468	0.460228	2.58088	-0.000805473	0.891591	1.98871	0.118515	0.0350621
4759.62	-0.0134175	0.367433	0.00116809	0.603761	2.21832	0.00431576	1.06317	2.0923	0.123917	-0.121182
4771.07	-0.0124943	0.266655	-0.00241401	0.723169	2.44126	-0.00520467	1.08334	2.05055	0.125653	-0.260423
4782.49	-0.115291	0.248861	0.00294153	0.572068	2.63578	0.00624457	1.0289	2.28171	0.12309	0.108898
4793.99	-0.165779	0.375628	-0.0030095	0.720751	2.84763	-0.00712459	1.11327	2.23341	0.172569	-0.121831
4805.37	-0.180778	0.39982	0.00245969	0.725297	3.09708	0.00745263	1.20592	2.4214	0.2141	-0.147906
4816.88	-0.20544	0.424299	-0.00144449	0.567155	3.36542	-0.00759583	1.11138	2.13487	0.230854	0.0444704
4828.29	-0.157904	0.377561	0.000316346	0.463773	3.50194	0.00795523	1.17252	2.18417	0.262642	-0.145776
4839.72	-0.157202	0.334307	0.000586539	0.546724	3.60298	-0.00551813	1.36609	2.15106	0.306774	0.0799554
4851.25	-0.0299721	0.276557	-0.00108619	0.286175	4.11694	0.00140904	1.29341	0.326024	0.368728	-0.0253964
4862.55	-0.0096818	0.177087	0.00116103	-0.00455949	3.9676	0.00688171	1.23495	1.05319	0.348748	0.024381
4874.19	-0.129567	0.0849529	-0.000911391	0.423829	3.86116	-0.021222	1.26194	2.06671	0.34319	0.504326
4885.43	0.0131361	0.0365528	0.000495326	0.42033	4.2452	0.0483083	1.2968	1.20012	0.399821	-0.17864
4897.04	0.027195	0.0852296	-6.82672e-05	0.216559	4.1581	-0.133494	1.29251	0.546361	0.418387	0.0976312
4908.49	-0.0151149	-0.0558077	-0.000251512	0.313722	4.23014	-0.197105	1.2759	-0.0618763	0.446622	-0.0878268
4919.75	0.0585884	-0.138676	0.000407279	0.29915	4.59333	0.0260963	1.32492	0.169316	0.491409	-0.0698578
4931.79	-0.00894893	-0.0945904	-0.000384205	0.328086	4.79522	0.00677812	1.21392	-0.20614	0.519017	0.643154
4942.33	-0.00362355	-0.363708	0.000214193	0.175547	4.7356	-0.0205742	0.943855	-0.0668741	0.444348	-5.03549

## Sheet: equalgrp
Time	Fly1	Fly2	Fly3	Fly4	Fly5	Fly6	Fly7	Fly8	Fly9	Fly10
9.04816	2.65439e-06	1.15823e-05	6.42465e-07	-1.77145e-06	4.25221e-06	-5.1882e-06	6.01002e-06	-1.45479e-07	7.5608e-06	5.19166e-06
20.6654	-3.55042e-06	-9.85572e-06	-1.15943e-05	2.32009e-06	-8.06942e-06	1.71235e-05	-9.06695e-06	-1.20624e-05	-7.20655e-06	-7.76095e-06
32.0169	3.59743e-06	4.01054e-06	2.31292e-05	-2.29851e-06	1.07015e-05	-2.81474e-05	1.02771e-05	2.52172e-05	4.22046e-06	8.72969e-06
43.516	-2.42426e-06	5.66077e-06	-3.15156e-05	1.47573e-06	-1.07459e-05	3.40796e-05	-8.45127e-06	-3.51811e-05	1.46871e-06	-7.09479e-06
54.9464	-7.49452e-08	-1.74248e-05	3.25466e-05	1.99679e-07	7.10522e-06	-3.07467e-05	2.94931e-06	3.71859e-05	-9.03039e-06	2.33113e-06
66.3754	3.59325e-06	2.8102e-05	-2.27915e-05	-2.50677e-06	5.06411e-07	1.54234e-05	5.86951e-06	-2.72129e-05	1.66414e-05	5.22767e-06
77.8637	-7.34417e-06	-3.35581e-05	1.10269e-06	4.91452e-06	-1.1126e-05	1.16223e-05	-1.63526e-05	3.69123e-06	-2.16991e-05	-1.41451e-05
89.2613	1.01322e-05	2.97298e-05	3.00343e-05	-6.63519e-06	2.23511e-05	-4.59704e-05	2.55829e-05	3.09371e-05	2.1393e-05	2.1916e-05
100.751	-1.0594e-05	-1.40547e-05	-6.38387e-05	6.78847e-06	-3.05663e-05	7.88361e-05	-2.98555e-05	-6.93815e-05	-1.35859e-05	-2.53827e-05
112.171	7.59768e-06	-1.30182e-05	8.97752e-05	-4.66621e-06	3.16819e-05	-9.82727e-05	2.5625e-05	9.99879e-05	-2.16775e-06	2.15508e-05
123.626	-7.30067e-07	4.6924e-05	-9.56153e-05	4.84072e-08	-2.23448e-05	9.19666e-05	-1.0794e-05	-0.000108931	2.37609e-05	-8.68933e-06
135.079	-9.26068e-06	-7.88342e-05	7.09439e-05	6.51678e-06	1.40282e-06	-5.13278e-05	-1.39583e-05	8.40699e-05	-4.61933e-05	-1.25445e-05
146.511	2.02372e-05	9.69169e-05	-1.15065e-05	-1.35809e-05	2.8779e-05	-2.39928e-05	4.42498e-05	-1.98393e-05	6.20847e-05	3.83334e-05
157.976	-2.88287e-05	-8.91577e-05	-7.67487e-05	1.89179e-05	-6.16621e-05	0.000122537	-7.19563e-05	-7.80859e-05	-6.32234e-05	-6.16937e-05
169.408	3.10764e-05	4.74247e-05	0.000175455	-1.99664e-05	8.70426e-05	-0.000220053	8.64468e-05	0.000190044	4.30485e-05	7.35581e-05
180.864	-2.35523e-05	2.81052e-05	-0.000254961	1.45722e-05	-9.30353e-05	0.000282499	-7.71994e-05	-0.000283312	3.99267e-07	-6.50299e-05
192.307	4.7632e-06	-0.00012553	0.000279837	-1.90077e-06	6.94663e-05	-0.000273689	3.74748e-05	0.000317927	-6.18772e-05	3.05209e-05
203.753	2.35239e-05	0.000220422	-0.00021866	-1.67239e-05	-1.20977e-05	0.000166862	3.17751e-05	-0.00025743	0.000127735	2.89362e-05
215.204	-5.55268e-05	-0.000279005	5.65328e-05	3.7373e-05	-7.34271e-05	4.214e-05	-0.000119018	8.29147e-05	-0.000177104	-0.000103274
226.645	8.17637e-05	0.000265904	0.000192864	-5.37771e-05	0.000169394	-0.000323994	0.000201695	0.000193117	0.000186067	0.000173087
238.098	-9.07816e-05	-0.000155686	-0.000480038	5.85071e-05	-0.000247083	0.000612001	-0.000249408	-0.000517943	-0.000134637	-0.000212422
249.541	7.22896e-05	-5.42143e-05	0.000721777	-4.50474e-05	0.00027208	-0.00080947	0.000231135	0.000800022	1.52986e-05	0.000195004
260.989	-2.11919e-05	0.000333079	-0.000815785	1.04245e-05	-0.00021378	0.000810535	-0.000125662	-0.000924375	0.000159178	-0.000103152
272.436	-5.85102e-05	-0.000613669	0.000668014	4.22795e-05	5.7521e-05	-0.000532814	-6.70749e-05	0.000782399	-0.000351675	-6.25628e-05
283.882	0.000151351	0.000800236	-0.000228502	-0.000102445	0.000183759	-4.44545e-05	0.000317257	-0.000311789	0.000503395	0.000275976
295.331	-0.000230979	-0.000789535	-0.000473162	0.000152421	-0.00046257	0.000847669	-0.000563046	-0.000462979	-0.000545122	-0.000483695
306.776	0.000264619	0.000502905	0.00130511	-0.000170691	0.000698866	-0.00169492	0.00071833	0.00140301	0.000416714	0.000612027
318.224	-0.000221448	7.69601e-05	-0.00203608	0.00013773	-0.000793848	0.00231327	-0.000691648	-0.00225457	-9.14269e-05	-0.000583543
329.67	8.3699e-05	-0.000874671	0.00237304	-4.35984e-05	0.000655596	-0.002394	0.000414738	0.00268704	-0.00040124	0.000341718
341.117	0.000141884	0.00170842	-0.00203469	-0.000104581	-0.00023283	0.00168297	0.000124341	-0.00237246	0.000962563	0.000121003
352.564	-0.000415289	-0.00230495	0.000851125	0.000278121	-0.000450366	-9.05814e-05	-0.000851369	0.00109917	-0.00142946	-0.000738873
364.011	0.000660546	0.00235095	0.00113022	-0.000428505	0.00126874	-0.00220621	0.0015898	0.00109905	0.00160115	0.00136134
375.458	-0.000775772	-0.00158678	-0.00356345	0.000495635	-0.00199268	0.00470635	-0.00207638	-0.00383929	-0.00129011	-0.00176789
386.905	0.000660198	-6.69626e-05	0.00578534	-0.000422861	0.00232066	-0.00661684	0.00202298	0.00636824	0.000392535	0.00171864
398.352	-0.000260664	0.00238155	-0.00691009	0.000172997	-0.00196183	0.00701054	-0.00123187	-0.00769672	0.00102654	-0.00104409
409.799	-0.000389649	-0.00478029	0.00605706	0.000244514	0.000753537	-0.00511917	-0.000291571	0.00687612	-0.00268243	-0.000263874
421.245	0.00115117	0.00643251	-0.00268318	-0.000746498	0.00120771	0.000684299	0.00227209	-0.00333435	0.00410984	0.00198252
432.692	-0.00171414	-0.00638142	-0.00293457	0.00124765	-0.00343048	0.00573587	-0.00404651	-0.00247908	-0.0045981	-0.0035726
444.139	0.00189124	0.00428098	0.00958904	-0.0015155	0.00524986	-0.0125535	0.00511651	0.00931728	0.00361974	0.00455889
455.586	-0.00161494	-0.000480282	-0.0150648	0.00139001	-0.00591125	0.0177355	-0.00522034	-0.0153976	-0.000881575	-0.00458475
467.033	0.00144373	-0.00362192	0.0178267	-0.00035322	0.0054909	-0.0193685	0.00521025	0.0207628	-0.00244775	0.0040604
478.48	-0.00102851	0.00869121	-0.0178033	-0.00143999	-0.00392212	0.0168706	-0.00423166	-0.0257577	0.00463301	-0.0022472
489.927	-0.0037268	-0.020799	0.00998823	0.00016456	-0.0012776	-0.00859727	-0.00605394	0.0135209	-0.0132392	-0.00534156
501.374	0.000760123	0.0182168	-0.00497695	-0.00638555	0.00177563	-0.0118095	0.00493507	-0.0103139	0.00832556	0.00471592
512.821	-0.0114601	-0.0320141	-0.0198503	0.000423877	-0.0182121	0.0270818	-0.0286203	-0.0240099	-0.016724	-0.0215933
524.267	0.00787668	0.015437	0.02752	-0.0104524	0.0187984	-0.062631	0.0272243	0.0433281	-0.00317842	0.0202357
535.714	-0.0306511	-0.0210021	-0.0636907	-0.00525903	-0.052802	0.0785269	-0.0633517	-0.113876	0.00734368	-0.0501905
547.161	0.10812	0.0614905	0.338065	0.119293	0.120237	-0.122874	0.201314	0.669485	0.302736	0.108908
558.608	0.627096	1.12055	0.476491	0.51233	0.446655	0.158759	1.15966	1.60205	1.03104	0.7327
570.055	1.05723	1.77445	0.885084	1.00546	0.814745	0.987112	1.77745	1.76346	1.3747	1.24887
581.502	1.35663	1.88186	2.02339	1.3165	1.71079	1.22642	2.25449	2.19146	1.74084	1.73596
592.949	1.63242	2.57935	2.0673	1.76993	2.12008	1.81902	2.85453	2.5919	2.30666	2.10053
604.396	1.78722	2.95289	2.40191	2.258	2.16085	2.19593	2.85805	2.94752	2.64642	2.27452
615.842	2.00173	3.08197	2.82641	2.55801	2.70685	2.57161	3.0259	3.23298	3.17096	2.62236
627.289	2.24618	3.48305	2.75863	3.04187	2.91109	3.18338	3.26173	3.49964	3.57301	2.95036
638.736	2.48454	3.68359	3.3645	3.53561	3.09406	3.3541	2.61089	3.6316	3.59857	3.20577
650.183	2.68966	3.88663	3.21242	3.97401	3.59774	3.70891	2.99687	3.75324	3.87639	3.60552
661.63	2.7751	3.98292	3.23043	4.62579	3.73509	3.99313	3.98674	3.99235	4.29275	4.00443
673.077	2.83633	3.85415	3.79171	4.86569	3.68328	4.34532	3.82677	3.8327	4.18573	4.0579
684.524	2.96542	3.93025	3.63426	4.80992	3.841	4.65025	3.90593	4.0249	4.35575	4.09744
695.971	3.10075	3.96285	3.73464	5.43319	4.13637	4.71488	3.99991	4.18471	4.61392	4.49625
707.418	3.1542	3.90051	3.94655	5.74326	4.07435	4.86347	3.79025	4.24005	4.33501	4.74965
718.864	3.13789	3.92626	4.21492	5.34713	3.98175	4.92217	3.88635	4.34131	4.29772	4.80242
730.311	3.14481	3.99673	4.50032	5.51087	4.15564	4.92036	3.96912	4.01513	4.37585	5.01068
741.758	3.14777	4.15036	4.5972	6.09949	3.9143	4.78449	3.95998	4.23299	4.28096	5.14391
753.205	3.11933	4.20531	4.82313	5.95175	3.4224	4.79212	4.01892	4.66817	4.31889	5.09554
764.652	3.09435	4.11188	4.91616	5.43385	3.11072	4.82185	4.02735	4.21932	4.38345	5.0976
776.099	3.19948	4.11575	4.95657	5.9093	2.6593	4.72909	3.79872	3.75786	3.98412	5.28214
787.546	3.25661	4.03171	5.04445	6.26781	2.46356	4.83098	3.79638	4.45447	3.98348	5.36132
798.993	2.90122	4.03146	5.03975	6.15993	2.41844	4.75488	3.27789	4.9129	4.47087	5.29318
810.44	2.92387	4.39947	4.792	5.98596	1.94638	4.45895	3.06146	4.66124	4.57268	5.31787
821.886	3.02324	4.27144	4.67024	5.51162	1.91795	4.45854	3.87931	4.55373	4.52114	5.27977
833.333	2.82005	3.96971	4.57564	5.75867	1.79941	4.48566	3.73435	4.49276	4.44497	5.30824
844.78	2.95079	4.16649	4.54069	5.48632	1.5955	4.13373	3.52885	4.60505	4.41397	5.32664
856.227	2.73268	3.92972	4.66876	4.53557	1.9348	4.04148	3.83805	4.48595	4.09983	5.22608
867.674	2.37258	3.74279	3.87084	4.36819	1.67353	4.0431	3.68592	4.35409	3.85013	5.26908
879.121	2.39924	3.7109	3.57068	3.87188	1.32684	3.80258	3.59441	4.1866	4.03449	5.26321
890.568	2.42881	3.33205	4.32224	3.20265	1.04177	3.64707	3.54176	4.11194	4.01345	4.89766
902.015	2.21386	3.31823	4.11002	3.11689	0.395199	3.35705	3.31381	4.10608	3.97976	4.64733
913.462	2.08429	3.26633	3.78411	2.61221	0.21119	3.16764	3.33405	3.72909	4.13057	4.50083
924.908	2.14652	3.07051	3.81427	2.27114	0.0312394	3.14047	3.10567	3.79199	3.91481	4.12269
936.355	2.04538	3.0274	3.70895	2.28191	-0.290089	3.10455	3.15618	3.62088	3.53769	4.16935
947.802	2.22096	2.88933	3.75994	1.74237	-0.241395	3.14504	3.1568	3.23514	3.32245	3.87082
959.249	2.29582	2.49089	3.57345	1.35781	-0.317414	3.21191	1.70855	3.33468	2.93951	3.55513
970.696	2.23618	2.06179	3.44824	1.06494	-0.374805	3.19661	2.00589	3.49631	2.67576	3.48898
982.143	2.48981	2.07042	3.70667	0.850059	-0.179154	3.14087	3.32917	3.10975	2.80009	2.75233
993.59	2.52131	1.75972	3.57105	0.995576	-0.199851	3.16956	2.98094	2.74308	2.61644	2.92122
1005.04	2.47369	1.34836	3.26786	1.05108	-0.293227	3.03572	2.90759	3.31136	2.61948	2.92379
1016.48	2.44444	1.49804	3.23795	1.25281	-0.237921	3.08082	2.86411	3.41879	2.94677	2.28293
1027.93	2.32894	1.55773	2.97358	1.33601	-0.0880173	3.09869	2.43277	3.33839	2.70351	1.9029
1039.38	2.36511	1.42844	2.5767	1.35677	0.00574984	2.67321	2.47721	3.47052	2.7359	1.19866
1050.82	2.34715	1.33257	2.45455	1.58989	0.108505	2.49833	2.98277	2.92843	2.68405	0.963429
1062.27	2.32566	1.34307	2.36004	1.73037	0.410571	2.21711	2.96208	2.92734	2.08614	0.34962
1073.72	2.31905	1.33067	2.10446	1.91507	0.432652	1.78973	2.44426	3.40979	1.69499	-0.254105
1085.16	2.15541	1.38018	1.97501	2.16528	0.550263	1.50625	2.38305	3.33461	1.28165	0.00287563
1096.61	2.22282	1.40786	1.86068	2.48377	0.850941	1.02075	2.02675	3.28132	1.02897	0.0817014
1108.06	1.9963	1.43982	1.85271	2.38327	0.833408	0.670924	1.70679	3.2629	0.683016	0.16208
1119.51	1.51866	1.57083	1.79828	1.98435	1.11405	0.311402	1.78288	3.04112	0.237661	0.214798
1130.95	1.75456	1.54822	1.36817	2.13661	1.19972	0.0715146	1.25348	2.81853	0.0221429	0.274359
1142.4	1.93675	1.7125	1.64255	2.76277	1.27666	0.0717401	0.863762	2.44121	-0.213082	0.212804
1153.85	1.73882	1.77156	1.82158	3.18183	1.51149	0.0611748	0.887357	2.13446	-0.2721	0.0474314
1165.29	1.7831	1.77573	1.4837	3.12463	1.26954	0.150031	0.764918	2.01452	-0.423717	0.123852
1176.74	1.78587	1.9801	1.64215	3.17393	1.52862	0.178525	0.83435	1.85963	-0.608576	-0.130834
1188.19	1.65847	1.86846	1.70689	3.29886	1.64813	0.417683	0.676266	1.99866	-0.532809	-0.228109
1199.63	1.79452	1.90303	1.6867	3.2271	1.71277	0.596627	0.488695	2.12521	-0.380468	-0.10614
1211.08	1.77142	1.892	1.3819	3.29763	2.11648	0.667637	0.751439	2.02915	-0.259591	-0.311476
1222.53	1.618	1.58492	1.55918	3.32786	2.09369	0.925927	1.01547	2.14449	-0.139272	-0.256435
1233.97	1.748	1.55845	1.87526	3.20045	2.15677	1.02727	1.21594	2.34869	-0.0403081	-0.0786856
1245.42	1.69302	1.51454	1.48267	3.31368	2.18067	1.14623	1.09414	2.38577	-0.0895488	-0.0974996
1256.87	1.54587	1.4727	1.7533	3.34959	2.50398	1.30561	0.945377	2.21906	0.00494662	-0.186779
1268.31	1.54543	1.53014	1.87926	3.23401	2.40744	1.48613	1.04251	2.07828	-0.0126982	-0.161514
1279.76	1.53493	1.43733	1.78793	3.37402	2.0939	1.56981	0.995462	2.25591	-0.126887	-0.0379001
1291.21	1.4754	1.09594	1.93786	3.33095	2.6935	1.62266	0.937208	2.33195	0.00279418	-0.0455686
1302.66	1.37712	0.957367	1.74519	3.23704	2.69081	1.69821	0.715736	2.27547	-0.0220971	0.0387963
1314.1	1.42836	1.03329	1.78479	3.37555	2.6356	1.61919	0.620637	2.32446	0.0725202	-0.018183
1325.55	1.26792	0.978599	1.76694	3.22782	2.85205	1.77679	0.64613	1.80402	0.0874406	-0.120353
1337	1.11802	1.25525	1.79073	2.99204	2.59086	1.81009	0.582161	1.39006	-0.0454862	-0.00389463
1348.44	1.28368	1.15938	1.88214	2.79105	2.504	1.71155	0.763916	1.74943	-0.0110541	-0.141545
1359.89	1.25279	1.14289	1.7656	2.7216	2.44557	1.69533	0.737824	1.82966	-0.0177508	-0.0669939
1371.34	1.17376	1.28885	2.04163	2.64078	2.34153	1.65428	0.912284	1.66517	0.0631421	0.235617
1382.78	1.26941	0.92379	1.61077	2.27318	2.23057	1.81499	1.07612	1.7446	0.0114985	0.37072
1394.23	1.34422	1.24568	1.60022	2.20284	1.94989	1.73055	0.895422	1.85147	-0.00326086	0.618184
1405.68	1.28075	1.11318	2.14645	2.08722	1.50632	1.68375	1.21613	1.74454	-0.0246181	0.745516
1417.12	1.29402	0.771479	1.2856	1.7674	1.08411	1.78261	1.33204	1.80814	-0.12398	0.827374
1428.57	1.25812	1.15002	1.60468	1.60959	1.1181	1.60036	1.36318	1.98951	0.00772529	0.88843
1440.02	1.11228	0.992211	2.13509	1.441	1.17344	1.55425	1.59389	1.45385	0.00911361	0.985054
1451.47	1.2651	0.895116	1.77654	1.2598	1.14262	1.39801	1.71885	1.2807	-0.0159273	1.14354
1462.91	1.20578	1.07943	2.11436	1.05844	1.28171	1.30759	2.00568	1.71115	0.0166247	0.818952
1474.36	1.01122	1.00333	1.71572	1.03954	1.06943	1.33464	1.9633	1.82704	-0.0133123	0.86455
1485.81	0.98715	0.761022	1.24225	1.1925	0.942757	1.15301	2.03546	1.72015	0.00796524	1.17472
1497.25	0.819743	0.834079	1.32259	1.27351	1.1699	1.31127	2.27734	1.64858	-0.0012446	1.07867
1508.7	0.799037	0.964367	1.73194	1.3757	1.23083	1.3927	2.32316	1.80886	-0.00433004	1.2367
1520.15	0.616591	0.718464	2.12782	1.61173	1.25468	1.40551	2.47176	1.59624	0.00856221	1.27791
1531.59	0.493986	0.645733	1.86613	1.71901	1.4018	1.4444	2.49276	1.58429	-0.00942688	1.4089
1543.04	0.609485	0.560576	1.57329	1.95802	1.57555	1.40647	2.79857	1.83687	0.00729523	1.50839
1554.49	0.533027	0.515775	1.54288	2.33495	1.66195	1.57996	3.00648	1.57741	-0.00125263	1.30742
1565.93	0.605519	0.519695	1.93857	2.50638	1.65181	1.50214	2.93783	1.63192	-0.00890904	1.50657
1577.38	0.647827	0.426993	2.2701	2.77337	1.6107	1.55755	3.0119	1.81551	0.0256101	1.52628
1588.83	0.609545	0.487042	2.36382	2.97265	1.71498	1.57676	2.79984	1.8229	-0.0706046	1.53724
1600.27	0.755968	0.459195	2.33445	3.17237	1.88711	1.6349	2.95084	2.0441	-0.0937467	1.76502
1611.72	0.863581	0.638667	2.28483	3.39699	1.73284	1.66879	2.91469	2.06097	0.00901238	1.60689
1623.17	0.8988	0.74043	2.40549	3.57248	1.63705	1.52473	2.51454	2.1341	0.00517601	1.53614
1634.62	0.926981	0.689333	2.31264	3.58033	1.77776	1.63689	2.71125	2.09554	-0.00886937	1.65925
1646.06	0.874565	0.946899	2.44284	3.63913	1.7652	0.953882	2.88033	2.01639	0.0064051	1.76412
1657.51	0.940599	1.11323	2.58324	4.02856	1.87769	1.11157	2.98079	2.21237	0.000227005	1.65032
1668.96	0.972434	1.33033	2.55634	3.93067	2.09913	1.02317	3.0818	1.95897	-0.00854766	1.53313
1680.4	0.873595	1.626	2.64917	3.89443	2.10493	0.143154	3.26297	2.13198	0.0183052	1.99413
1691.85	0.862644	1.84513	2.57992	4.13311	2.06711	1.22034	3.09161	2.26917	-0.027029	2.13619
1703.3	0.973401	2.06719	2.64304	4.25125	2.28839	1.49767	3.29255	1.9736	0.0299499	1.95476
1714.74	1.09254	2.24632	2.56085	4.45788	2.41678	1.19619	3.81886	2.6457	0.091553	2.24258
1726.19	0.895797	2.35494	2.43918	4.19191	2.80623	1.5388	3.07101	2.83048	-0.0723075	2.11538
1737.64	1.20883	2.46499	2.59565	4.24219	3.54505	1.2892	3.27524	2.58109	-0.0643903	1.91555
1749.08	1.61155	2.5629	2.56283	4.4151	3.7104	1.1196	3.93123	2.73464	0.0609727	2.07118
1760.53	1.57163	2.6161	2.73505	4.13489	4.01554	1.44334	3.78683	2.58458	0.094839	1.39867
1771.98	1.89001	2.80726	2.63271	4.51791	4.20182	1.33002	4.10877	2.70245	0.0215361	0.721975
1783.42	2.18744	2.62974	2.04026	4.57655	4.2013	0.698196	4.12976	2.6713	-0.0185024	0.57914
1794.87	2.31564	2.43045	2.43257	4.43063	4.42511	1.10207	4.29623	2.70785	0.0130371	0.255152
1806.32	2.22524	2.54455	2.94277	4.86492	4.3135	1.44793	4.51062	2.82104	-0.00852453	0.017554
1817.77	2.2355	2.3861	2.68631	4.80093	4.59626	1.3339	4.5599	2.26818	0.00573744	-0.0415087
1829.21	2.29292	2.40133	2.75649	4.81179	4.47145	1.50831	4.69333	2.33941	-0.00432741	0.201867
1840.66	2.15107	2.529	2.89005	4.96043	4.04794	1.38666	4.59057	2.838	0.00220194	0.502154
1852.11	2.2413	2.59522	2.7454	4.80828	4.46016	1.50886	4.94864	3.03594	-0.00106158	0.59352
1863.55	2.27212	2.5491	2.72658	4.95546	4.90766	1.64804	5.10176	3.11526	-0.00339372	0.661673
1875	2.24548	2.26854	2.80619	4.96641	5.14189	1.40045	4.93567	3.21273	0.00926767	0.664389
1886.45	2.17494	2.06077	2.824	4.94618	5.19375	1.24741	5.14813	3.34397	-0.0274535	0.718433
1897.89	2.07074	1.92038	2.6791	4.84897	5.67241	1.23279	5.22672	3.24114	0.0865938	0.819208
1909.34	2.29898	1.90916	2.80496	4.5161	6.06824	1.26245	5.26464	3.49318	0.0718441	0.835437
1920.79	2.13717	1.97735	2.79503	4.908	5.85922	1.3244	5.23315	3.86731	0.0389085	0.625416
1932.23	1.74744	2.33246	2.60089	4.85316	5.89188	1.46503	5.14733	3.78913	0.224012	0.395809
1943.68	2.00527	2.75723	3.06065	3.97359	6.19014	1.5973	5.31123	3.68137	0.276643	0.428058
1955.13	1.94182	3.08061	2.87627	4.06236	6.61086	1.5569	5.30783	3.84344	0.386878	0.482438
1966.58	1.70769	3.44727	2.63204	4.55076	6.68756	1.56516	5.30993	3.92411	0.52158	0.624798
1978.02	1.61068	3.50475	3.0484	4.30602	6.79949	1.64702	5.4895	3.7316	0.530095	1.0332
1989.47	1.22178	3.80909	3.03561	3.32119	7.08003	1.69135	5.42021	3.76835	0.565859	1.21185
2000.92	1.12604	4.2527	3.11797	2.73969	7.15855	1.84887	4.99358	3.81781	0.580187	1.38399
2012.36	0.918545	4.27703	3.2718	3.48884	7.30576	1.83637	4.81485	3.63662	0.646909	1.57577
2023.81	0.865312	4.4606	3.42973	4.23858	7.26992	1.80081	5.11858	3.41511	0.688512	1.56337
2035.26	1.07342	4.70789	3.44257	4.33808	7.44058	1.95331	5.20419	3.44991	0.653426	1.79408
2046.7	0.91344	4.70209	3.52014	4.23352	7.52813	2.05739	5.08368	3.70354	0.695657	1.78233
2058.15	1.18611	4.65845	3.56127	3.86185	7.59163	2.17645	5.02078	3.36146	0.696143	1.99637
2069.6	1.36247	4.56659	3.24144	3.83634	8.04554	2.28533	4.96598	3.30417	0.638253	2.3153
2081.04	1.23715	4.70615	3.22343	4.35074	7.68106	2.50732	5.07543	3.15018	0.736463	2.3204
2092.49	1.42824	4.9942	3.02931	4.57981	7.90474	2.51735	5.29648	2.37188	0.777181	2.77026
2103.94	1.46299	5.09907	2.95389	4.63208	8.61824	2.32851	5.25195	3.10058	0.616189	2.78875
2115.38	1.40165	5.19262	3.36145	4.7909	8.27578	2.49885	5.17047	3.732	0.802521	2.69017
2126.83	1.3484	5.4227	3.65619	4.80566	8.29164	2.55251	5.33054	3.68058	0.890083	3.01497
2138.28	1.32563	5.35822	3.55525	4.73758	8.38447	2.56289	5.19081	3.84782	0.611793	3.32713
2149.73	1.32943	5.33329	3.59563	4.74989	8.28454	2.77043	5.17298	3.51689	0.76082	3.65372
2161.17	1.26076	5.54357	3.91885	5.00908	8.33161	2.73738	5.63781	3.80907	0.887151	3.62167
2172.62	1.15068	4.74937	3.76447	5.14181	8.35165	2.65139	5.74996	3.99092	0.899897	3.82928
2184.07	1.0547	4.78755	4.06428	5.1087	8.34236	2.44645	5.54498	3.85608	1.15195	4.21366
2195.51	0.874369	5.62355	3.804	5.27247	8.27196	2.22829	5.61298	3.9916	1.12145	4.38346
2206.96	0.500817	5.35313	3.2118	5.01935	8.42199	2.3683	5.80218	4.00593	1.05827	4.54757
2218.41	0.543803	5.54497	3.97544	4.91969	8.26604	2.48802	5.8477	4.18363	1.12263	4.6208
2229.85	0.773361	5.60671	3.89999	5.29636	8.46689	2.55016	5.77089	4.08835	1.18048	4.8178
2241.3	0.717789	5.45092	3.40206	5.10549	8.91817	2.5631	5.85838	4.14946	1.33305	4.85303
2252.75	0.829168	5.66142	3.41553	4.86672	8.51136	2.74094	5.83606	4.22788	1.36258	5.06947
2264.19	1.13993	5.7936	3.21442	4.86702	8.70136	3.02218	5.65678	3.69147	1.57028	5.23107
2275.64	1.27349	5.82222	3.2236	4.8441	8.99858	3.04531	5.80419	3.58617	1.64374	4.98429
2287.09	1.2145	5.54487	3.17858	4.75052	8.89506	3.32634	5.75424	4.03477	1.45324	4.96331
2298.53	1.45762	5.83696	3.143	4.61336	9.28068	3.33888	5.51473	4.16775	1.61605	4.87494
2309.98	1.52601	5.64126	2.9487	4.8111	9.16543	3.16328	5.48696	3.88772	1.77191	5.04003
2321.43	1.47962	5.50255	2.66852	4.71118	9.018	3.31553	5.59957	3.86163	1.96692	5.12402
2332.88	1.64838	5.42243	2.80124	4.56771	9.39633	3.07798	5.47719	4.00962	2.2589	5.26971
2344.32	1.50636	5.07949	2.70973	4.6745	9.37876	3.18152	5.20121	3.90818	2.31973	5.71575
2355.77	1.42037	5.67003	2.66044	4.51635	8.90156	3.23905	5.25183	4.08245	2.43781	5.52893
2367.22	1.18668	4.7042	2.91228	4.44219	8.86738	2.82255	5.28355	4.0256	2.52348	5.54338
2378.66	0.926177	4.46949	2.84863	4.26174	9.01505	3.05273	5.3462	3.80961	2.54734	5.67033
2390.11	1.05638	5.61868	2.63533	4.14855	8.74742	3.20228	5.36596	4.0476	2.63992	5.86949
2401.56	1.10927	5.30393	2.72267	4.30612	8.97131	3.04096	5.26947	3.99343	2.75066	6.3573
2413	1.17855	5.34184	2.82599	4.37454	9.23607	2.97459	5.36239	3.90428	2.91998	6.1751
2424.45	1.32864	5.39481	2.69175	4.47562	9.16479	2.98951	5.38172	4.01748	2.92666	6.18685
2435.9	1.50382	5.34179	2.85738	4.60276	9.15702	2.99128	5.32589	3.95835	3.17505	6.34405
2447.34	1.64794	5.52776	2.79876	4.51203	8.81404	2.9489	5.43766	3.98882	3.52739	6.23109
2458.79	1.78535	5.26078	2.50524	4.34842	8.38025	3.08188	5.5459	4.01597	3.35025	6.40922
2470.24	1.85007	5.16572	2.70177	4.42654	8.28405	3.09903	5.51398	4.14715	3.33045	6.44608
2481.68	1.797	5.35208	2.6228	4.20398	8.86742	3.21682	5.37533	4.27495	3.51517	6.46329
2493.13	1.83975	5.50785	2.4478	4.05774	8.95192	3.26716	5.34607	4.31856	3.48922	6.51498
2504.58	1.77224	5.34113	2.25866	4.33068	8.27679	3.43091	5.60034	4.1489	3.66328	6.39428
2516.03	1.83774	5.22289	2.28238	4.29459	8.80444	3.79629	5.66611	3.69511	3.6627	6.34562
2527.47	1.97618	5.40649	2.59046	4.0872	8.9128	3.85768	5.58125	3.99259	3.66775	6.43586
2538.92	1.81432	5.32533	2.57986	4.13709	8.43207	4.06318	5.76554	4.07647	3.69313	6.39755
2550.37	1.91452	5.3338	2.78117	4.52043	8.73622	4.08632	5.75639	3.77682	2.84961	6.42458
2561.81	1.87872	5.49363	2.84412	4.45196	8.2816	4.1341	5.47003	4.06189	2.38579	6.34463
2573.26	1.7968	5.47372	3.00639	4.21148	8.19355	4.46731	5.47548	3.59165	2.32999	6.05812
2584.71	2.02493	5.68387	3.12687	4.30408	8.18475	4.50828	5.51825	3.31006	2.01577	6.50308
2596.15	1.99339	5.61906	2.92716	3.98641	7.832	4.57073	5.20316	3.40047	2.17266	6.61075
2607.6	2.06683	5.45281	3.55415	4.20965	8.08562	4.27604	5.28206	3.00435	2.37198	6.21826
2619.05	1.9271	5.46027	3.72702	4.63671	7.80257	3.59673	5.46154	2.93171	2.73691	6.58026
2630.49	1.92883	5.26737	3.56714	3.93124	7.58427	3.49388	5.42749	2.90524	3.22387	6.43475
2641.94	1.91838	5.39656	4.02697	3.92656	7.05413	3.52025	5.63062	3.086	3.35408	6.2294
2653.39	1.80101	5.4671	3.64433	4.3723	6.99908	3.53018	5.43964	2.74766	3.81753	6.56758
2664.84	2.04457	5.38485	3.45814	3.86746	7.58561	3.8122	5.40375	2.45346	4.09505	6.43723
2676.28	1.42922	5.39411	3.65034	4.02305	7.40358	3.96061	5.45661	2.76618	4.05678	6.40204
2687.73	1.5377	5.36954	3.81813	4.43051	7.4257	4.13985	5.45815	2.43201	4.30414	6.53325
2699.18	2.21227	5.49167	4.03762	4.55199	6.92338	4.0844	5.78676	2.21351	4.38742	6.54079
2710.62	2.05512	5.51785	3.83463	4.88261	7.01634	4.13278	5.59692	2.49917	4.5444	6.44438
2722.07	2.20183	5.5091	4.58099	4.9687	6.72575	3.72553	5.60378	2.56207	4.5962	6.55901
2733.52	2.27332	5.42125	4.95535	5.15712	5.16576	2.76227	5.86977	2.34174	4.69196	6.57924
2744.96	2.2748	5.36224	4.96196	5.06888	5.96702	3.43914	5.75869	2.42588	5.06091	6.503
2756.41	2.43091	5.32276	5.13861	5.28898	7.25991	3.99797	5.82622	2.68654	5.22581	6.70248
2767.86	2.50796	5.23361	5.01016	4.86226	7.11609	3.73585	5.86637	2.6909	5.18913	6.53434
2779.3	2.56007	5.31687	5.61304	4.18152	6.82718	3.9264	5.88872	2.97515	5.15241	6.59109
2790.75	2.67523	5.3875	4.55512	5.38088	6.59341	3.65538	6.22935	3.3498	5.52614	6.65028
2802.2	2.71055	5.4618	3.99003	5.68553	6.46993	3.78996	6.17533	3.28241	5.64414	6.53577
2813.64	2.66605	5.20794	5.47551	5.41064	6.62385	3.97234	6.0067	3.31867	5.80929	6.75166
2825.09	2.84839	5.06128	5.49771	5.52788	6.60902	3.7361	6.193	3.83128	6.38244	6.73051
2836.54	2.72331	5.23747	5.58648	5.13844	5.56838	4.10642	6.15085	4.18612	6.60985	6.6976
2847.99	2.66328	5.07532	5.69208	5.26497	5.71704	3.89276	6.19859	4.11004	6.85173	6.66126
2859.43	2.81304	5.07191	5.49723	5.10811	6.61133	3.77056	6.32352	4.19008	6.70554	6.73917
2870.88	2.68253	4.95483	5.99824	4.97095	6.22755	4.24637	6.51131	4.28596	6.74664	6.86093
2882.33	2.68249	4.80624	6.11496	5.07074	6.4718	4.30621	6.6858	4.36688	7.41287	6.89056
2893.77	2.85113	4.93306	6.14627	4.67774	6.66964	4.38149	6.7861	4.79237	7.35874	7.00765
2905.22	3.03381	4.53472	6.1485	4.86361	6.85655	4.18815	6.73058	4.94503	7.61433	6.89243
2916.67	2.82229	4.48096	5.75442	4.82574	7.21106	4.27273	6.02649	4.97804	7.80858	6.72142
2928.11	2.69059	4.54456	5.59127	4.44448	6.79306	4.48003	6.18815	5.16331	7.46048	6.46651
2939.56	2.73096	4.35741	5.50241	4.76088	7.09432	4.54412	6.76374	5.22469	7.8814	6.68762
2951.01	2.50683	4.62674	4.81944	4.82408	6.95047	4.91582	6.73101	5.49289	7.93688	7.16442
2962.45	2.81924	4.57711	4.62663	4.96619	6.68004	4.95778	6.79197	5.58457	8.06407	6.99963
2973.9	2.88367	4.33559	5.05946	5.3708	6.75723	4.9999	6.83576	5.60738	7.41091	6.84765
2985.35	2.84035	4.19444	4.84057	5.21534	6.26048	4.9004	6.93654	5.93691	6.07423	6.81842
2996.79	3.0875	4.01757	4.59761	5.06472	6.35928	4.60817	6.7457	5.48378	6.8196	6.65139
3008.24	2.71155	3.88458	4.7198	4.93008	6.46613	4.50475	6.58904	5.29095	7.10986	6.5041
3019.69	2.82845	3.82119	4.64137	4.59345	6.61878	4.08169	6.54959	5.93041	6.09558	6.43884
3031.14	2.92762	3.80752	4.58185	4.56848	6.59539	3.67515	6.5299	5.55796	5.41235	6.39089
3042.58	2.47049	3.61829	4.50925	4.74419	6.28212	3.28413	6.50559	5.64904	4.62641	6.33116
3054.03	2.61166	3.48225	4.08019	4.91237	6.14008	2.8538	6.29627	6.40909	3.83822	6.28781
3065.48	2.89801	3.35167	3.85245	4.9198	6.10409	2.72685	6.54963	6.34052	3.317	6.04368
3076.92	2.88174	3.24066	4.3125	4.65126	6.32163	2.63416	6.53686	6.51797	2.89348	5.91752
3088.37	3.03031	3.31303	4.66041	4.49315	6.06161	2.65198	6.34225	6.48702	2.72105	5.85533
3099.82	3.29185	3.38635	4.4963	4.33752	6.17929	2.66746	6.61743	6.33185	2.84378	5.54498
3111.26	2.96106	3.3668	4.51471	3.93409	6.28623	2.82796	6.42574	6.75991	2.46654	5.42239
3122.71	3.25729	3.26798	4.71128	4.01598	6.02369	2.96611	6.21704	6.76541	2.16107	5.35669
3134.16	4.07979	3.17316	4.6817	4.113	6.14649	3.1396	6.54881	6.79225	2.31964	5.18696
3145.6	4.06488	3.11109	4.82651	4.00746	5.77136	3.59023	6.63504	6.60347	1.80882	5.21329
3157.05	4.08223	3.20103	4.97157	4.29298	5.79569	3.62351	6.70447	6.43938	1.19087	4.97021
3168.5	4.10925	3.27526	4.84774	4.15316	5.98694	3.61564	6.74843	7.00427	1.20875	4.66969
3179.94	4.08459	3.30579	5.04241	3.87537	5.64033	3.42784	6.58548	6.86009	1.36358	4.61646
3191.39	4.18492	3.45541	5.1133	3.76688	5.64333	3.13497	6.63962	6.86691	1.64948	4.33014
3202.84	4.23071	3.47861	5.10827	3.75243	5.77106	3.27276	6.67024	7.03956	1.98181	4.44899
3214.29	4.39975	3.5163	5.45362	3.52289	5.84507	3.33721	6.86353	6.95864	2.09109	4.7463
3225.73	4.59443	3.56511	5.41313	2.97958	5.7238	3.2798	6.87307	7.15895	2.30537	4.7384
3237.18	4.73448	3.37144	5.05942	3.50817	5.86706	3.33957	6.96316	6.74767	2.62325	4.73343
3248.63	4.70942	3.70547	5.30627	3.9709	6.03493	3.64572	7.21642	7.10357	2.89158	4.64426
3260.07	4.71099	4.23268	5.70272	3.92797	5.78907	3.85038	7.09457	7.04608	2.92022	4.7818
3271.52	4.63504	4.19833	5.49394	4.17213	5.74694	4.00041	7.22021	7.01979	2.62825	4.98828
3282.97	4.47284	4.35567	5.64105	4.08608	5.8086	4.21614	6.97603	6.81541	2.43235	5.13378
3294.41	4.46234	4.56203	5.55089	4.0875	5.82177	4.37108	7.05406	4.45038	2.15619	5.24153
3305.86	4.30698	4.68676	5.40447	4.14896	5.88056	4.29107	7.15288	5.4757	2.10041	5.24715
3317.31	4.19449	4.83015	5.71794	4.16271	5.77988	4.03499	6.90819	7.12207	2.34489	5.17051
3328.75	4.06401	4.82519	4.85903	4.21056	5.52973	3.93351	7.48253	5.93214	2.39792	5.26018
3340.2	3.73039	4.88889	4.85373	4.07593	5.60964	3.96745	7.41371	6.00203	2.58101	5.63131
3351.65	3.44261	4.85504	5.75875	4.04342	5.87421	3.77634	7.22749	5.91197	2.64064	5.47665
3363.1	3.1508	5.12247	5.74718	3.87709	6.13534	3.10464	7.19927	5.80422	2.65296	5.4266
3374.54	2.80693	5.44274	5.9259	3.63888	6.14147	3.28796	7.14185	6.01861	2.68017	5.65157
3385.99	2.68736	5.42866	5.80293	3.88761	6.12296	3.78292	7.46602	5.42591	2.67557	5.42588
3397.44	2.58901	5.6696	5.6051	4.00199	6.15232	3.3657	7.25941	5.24055	3.13332	5.27302
3408.88	2.23818	5.82582	5.63621	3.95959	6.07245	3.01242	7.29399	5.06967	3.25352	5.10879
3420.33	1.83462	5.77809	5.59242	4.06333	6.22787	2.70128	7.57108	5.17008	3.36564	5.35956
3431.78	1.38178	5.76556	5.58556	3.85037	5.91488	2.32772	7.46253	5.54784	3.40132	5.3619
3443.22	0.958084	5.93862	5.39508	4.04006	6.20925	2.24056	7.37289	5.29053	2.82138	5.09772
3454.67	0.551216	5.90096	5.31559	4.32936	6.12065	2.20825	7.41144	5.07905	3.18076	5.41989
3466.12	0.218871	5.70476	5.12257	4.26453	5.34376	1.97463	7.36717	5.56519	3.71746	4.50952
3477.56	0.0420389	6.10205	5.20715	4.43793	6.30814	1.98739	7.36265	4.97518	3.68924	4.11008
3489.01	-0.0770222	5.87012	5.14852	4.30112	6.58757	2.2877	7.43341	3.50369	3.83217	5.14721
3500.46	0.0757686	5.62914	4.94579	4.2385	6.34064	2.31182	7.41821	4.3347	3.95524	5.23214
3511.9	0.261591	6.32406	5.14958	4.34196	6.61131	2.60949	7.51314	5.5185	3.97368	5.15769
3523.35	0.318765	6.0915	4.8949	3.93036	6.33196	2.97107	7.26776	5.23202	4.05988	5.6695
3534.8	0.794083	5.7892	4.84469	3.93366	6.6193	2.8279	7.29926	5.31733	4.25836	6.20035
3546.25	1.11355	6.3225	4.77537	3.94475	6.84893	2.8235	7.65336	5.58875	4.25656	6.08605
3557.69	1.05697	6.29142	4.53429	3.46763	6.5747	2.66388	7.40044	5.43688	4.39471	6.01751
3569.14	1.30444	6.22818	4.66576	3.62838	6.80305	2.33078	7.21191	5.4042	4.39923	6.1813
3580.59	1.28493	6.39115	4.4726	3.32159	6.81358	2.43557	6.81835	5.40651	4.16759	5.8078
3592.03	1.32942	5.76787	4.47764	2.95912	6.3862	2.4358	6.31025	5.26639	4.08841	5.76599
3603.48	1.82085	5.16211	4.45217	3.63025	6.45895	2.18887	6.25118	5.46713	3.52003	5.62746
3614.93	2.03309	5.5209	4.35247	3.63834	6.6249	2.33197	6.50522	5.52774	3.04276	5.08401
3626.37	2.05044	5.51536	4.55332	3.57077	6.6166	2.4982	6.82732	5.39355	2.74667	4.7822
3637.82	1.95745	4.72082	4.29942	3.86548	6.62403	2.32775	6.43177	5.4749	2.26176	4.18689
3649.27	1.9709	4.37561	4.1744	3.51453	6.61184	2.27253	6.29461	5.20409	2.00919	3.87199
3660.71	2.12712	4.32197	4.26785	3.04804	6.40039	2.28127	6.6584	5.20991	1.74996	3.63059
3672.16	2.13989	4.17301	4.01819	2.86286	6.37174	2.14475	6.54854	5.24533	1.6915	3.27049
3683.61	2.28474	3.98598	3.7774	2.70814	6.79558	1.92232	6.74394	4.97606	1.44798	3.32666
3695.05	2.42978	3.91874	3.71705	2.43898	6.91388	1.83336	6.69236	5.50752	1.0585	2.81512
3706.5	2.37125	3.71642	3.7499	2.49682	6.91957	1.77146	6.2759	4.84092	1.06123	2.46769
3717.95	2.38827	3.19383	3.8365	2.81376	6.7929	1.42806	6.4182	4.52818	1.1339	2.28633
3729.4	2.27135	2.89162	3.74826	2.84686	6.58252	1.27393	5.92542	5.18546	1.21328	1.81977
3740.84	2.26928	2.53483	3.54103	2.82272	6.54177	1.24677	5.51636	3.93882	0.994492	1.79688
3752.29	2.49599	2.22427	3.60975	2.8033	6.4169	0.951062	5.69585	4.24877	0.713464	1.66403
3763.74	2.46584	2.04117	3.52072	2.84112	6.47578	0.921524	5.37864	5.00017	0.412259	1.72988
3775.18	2.45362	1.92557	3.52432	3.02067	6.59917	0.860367	5.36784	4.7681	0.0976632	1.79493
3786.63	2.50466	1.86739	3.64615	3.28062	6.62467	0.681929	5.32753	5.19319	-0.114936	1.70678
3798.08	2.61662	1.67208	3.34865	3.50786	6.67999	0.712099	5.24273	4.98205	-0.432017	1.60297
3809.52	2.54085	1.51948	3.64005	3.43817	6.5638	0.617174	5.51151	5.08926	-0.423659	1.43388
3820.97	2.53134	1.46436	3.77865	3.41773	6.43273	0.620589	5.34682	5.19637	-0.379242	1.75094
3832.42	2.7425	1.57313	3.28528	3.62353	6.24908	0.755523	5.36127	5.20879	-0.350754	1.51297
3843.86	2.61628	1.61043	3.70016	3.75994	6.36696	0.998256	5.55381	5.32901	-0.427438	1.10227
3855.31	2.69652	1.57656	3.99373	3.98271	6.8085	1.00139	5.4788	5.34394	-0.431946	1.21237
3866.76	2.80701	1.53918	3.79716	4.12354	6.18368	0.86045	5.69238	5.41589	-0.320906	1.14955
3878.21	2.64655	1.69268	3.96837	4.2813	5.99191	0.988479	5.8521	5.06949	-0.471259	1.37833
3889.65	2.36682	1.97264	3.9012	4.4218	6.43376	0.877216	5.4581	5.25017	-0.189497	1.37946
3901.1	2.07289	2.11505	3.82671	4.22798	6.24613	0.78862	5.4532	5.71847	-0.122285	1.21732
3912.55	2.16063	2.26774	3.9255	4.19381	6.51334	0.830278	5.73792	5.50762	-0.182646	1.37052
3923.99	2.26472	2.24787	3.87579	4.21982	6.0884	0.773106	5.62922	4.80335	-0.0348833	1.25718
3935.44	2.24099	2.29713	3.94965	4.06156	5.87345	0.791828	5.71585	5.06288	-0.215543	1.28383
3946.89	2.39004	2.29948	3.80756	3.91562	6.31033	0.753106	5.38936	5.68381	-0.0650592	1.59793
3958.33	2.54373	2.40386	3.158	3.98708	6.28986	0.88792	5.32658	5.44048	0.0451396	1.59169
3969.78	2.6403	2.48163	2.85238	4.44675	6.47332	1.16423	5.35266	5.36203	-0.030235	1.49685
3981.23	2.77715	2.14015	3.07334	4.53027	6.42671	1.35197	4.28683	5.40441	0.0326223	1.75712
3992.67	2.95985	2.333	2.98849	4.21948	6.45617	1.5752	4.02564	5.35821	0.15065	1.59769
4004.12	2.93503	2.55912	2.67231	4.39438	6.34212	1.74928	4.12884	5.35948	0.0911802	1.64539
4015.57	2.57442	2.57984	2.64584	4.45864	6.27794	1.85115	3.61323	5.0341	0.0134881	2.13173
4027.01	2.59136	2.78498	2.49203	4.15423	6.3212	1.89455	3.65104	4.86486	0.234883	2.26007
4038.46	2.67928	2.69724	2.58493	4.21094	6.35867	1.86302	3.95815	5.32746	0.030264	2.86515
4049.91	2.55008	2.72779	2.54809	4.35618	6.55878	1.84805	4.013	5.36168	-0.00996324	3.06229
4061.36	2.67251	2.92114	1.51089	4.28037	5.66488	1.82955	4.02717	5.14368	0.165231	2.82375
4072.8	2.46741	2.86863	2.00756	4.13978	5.44271	1.72217	3.99056	5.07446	-0.00191154	2.95691
4084.25	2.40391	2.91582	2.84013	4.03603	6.26842	1.58253	3.97844	4.67479	-0.0559186	2.7798
4095.7	2.39126	2.98477	2.5296	4.04248	6.1716	1.66819	4.11769	4.71497	-0.093833	2.8874
4107.14	1.92358	2.93044	2.81905	3.94974	6.10225	1.88621	3.98243	4.79746	-0.00823426	3.14279
4118.59	2.21011	3.11281	2.64098	3.85708	6.17961	1.88887	3.96575	4.58801	0.0199526	3.22963
4130.04	2.50823	3.17036	2.83806	3.82712	5.97329	2.13066	3.95504	4.50394	-0.021099	3.55021
4141.48	2.28121	3.11959	3.19447	3.8662	5.91642	2.41865	3.45597	4.20333	0.0164176	3.63458
4152.93	2.3609	3.09478	2.79886	3.95051	6.02799	2.56516	3.38304	4.08603	-0.0125221	3.81332
4164.38	2.19102	2.92782	2.86119	3.72992	5.98991	2.82475	3.19947	4.13733	0.00900122	3.89492
4175.82	2.10788	2.89682	3.00931	3.49247	5.85492	2.77981	2.89619	4.23803	-0.0131147	3.9437
4187.27	2.29079	2.99409	3.16883	3.40462	6.17593	2.76561	3.12395	4.26234	0.047185	4.46915
4198.72	2.18585	3.14988	3.04764	3.38344	6.22452	2.73285	3.01466	4.13543	0.119684	4.38501
4210.16	2.256	3.13793	3.00717	3.29722	5.86504	2.66713	2.97928	4.29136	0.0712737	4.49957
4221.61	2.1444	3.25266	3.20192	3.02712	5.9668	2.81711	3.24944	3.83205	0.119987	4.53267
4233.06	2.17724	3.27645	3.13506	3.11435	5.94172	2.9221	3.32725	3.58991	0.177231	4.05521
4244.51	2.52281	3.21806	3.37818	3.28077	5.77341	3.17596	3.5304	4.26061	0.147669	4.74897
4255.95	2.33734	3.44224	3.34286	3.14603	5.7501	3.1646	3.76751	4.28167	0.11738	5.11762
4267.4	2.33236	2.73294	3.32884	2.9969	5.69086	3.09809	3.89645	4.18675	0.187721	5.09172
4278.85	2.57092	2.54604	3.50086	2.97691	5.73122	3.34331	3.92126	4.28567	0.240204	5.46514
4290.29	2.63773	3.43627	3.31719	3.06947	5.46358	3.28762	3.96171	4.50465	0.319036	5.41235
4301.74	2.7208	3.32327	3.52218	3.14888	5.28765	3.14866	3.92732	4.6905	0.542895	5.6113
4313.19	2.75498	3.15899	3.57429	3.174	5.32452	3.0647	3.94307	4.48812	0.633671	5.65165
4324.63	2.77136	3.16581	3.39671	3.10082	5.388	2.69605	4.06508	4.55137	0.742727	5.63917
4336.08	2.8805	2.93352	3.39478	3.03588	5.62685	2.49295	3.96325	4.54917	0.74066	5.79914
4347.53	3.10054	2.91983	3.19345	2.6742	5.34502	2.61244	4.11976	4.60396	0.647347	5.90055
4358.97	3.06275	2.95103	2.92127	2.41462	5.19504	2.41086	4.09732	4.63982	0.887801	6.31507
4370.42	3.0679	2.75362	2.74118	3.02042	5.39382	2.18311	3.91862	4.43693	1.03879	5.53401
4381.87	3.14399	2.39717	2.85707	3.50656	5.26172	2.26123	4.03192	4.47117	1.20451	5.37262
4393.31	2.75435	2.54457	2.6966	3.47213	5.30447	2.24851	4.12647	4.32444	1.43183	6.42557
4404.76	2.89589	2.44346	2.44435	3.37448	5.39689	2.21657	4.41167	4.43283	1.53042	6.36335
4416.21	3.30936	2.43821	2.74578	3.35992	5.32125	2.16433	4.52107	4.66608	1.6864	6.39726
4427.66	3.08617	2.84878	2.58467	3.59824	5.25252	2.03925	4.46428	4.4786	1.79656	6.0494
4439.1	3.08796	2.49457	2.57468	3.86305	5.11305	1.96694	4.49722	4.52399	2.01334	6.06181
4450.55	3.17034	2.44616	3.0631	4.01357	5.02134	1.92001	4.57272	4.50416	2.14145	6.3964
4462	2.81693	2.88369	3.0527	4.13384	5.01558	1.89286	4.57805	4.29497	2.06257	5.08176
4473.44	2.61819	2.82909	3.11823	4.228	4.9826	1.75678	4.50581	4.36269	2.23421	4.96102
4484.89	2.64304	2.64805	3.28077	4.25341	5.15446	1.61431	4.62758	4.22244	2.46458	5.39961
4496.34	2.63196	2.74183	3.19762	4.35297	5.18854	1.55464	4.64932	3.92351	2.53428	4.6304
4507.78	2.51941	2.92438	3.40733	4.3644	5.03636	1.44413	4.73971	3.62249	2.6426	4.68256
4519.23	2.42809	2.88773	3.63665	4.11933	5.07255	1.41548	4.75045	3.18838	2.78936	4.8337
4530.68	2.48461	3.04903	3.53691	4.16895	4.74411	1.27808	4.23695	3.39969	2.8394	4.65922
4542.12	2.21709	3.08062	3.60445	4.04864	4.57645	1.12901	3.63091	3.56797	2.89214	4.83948
4553.57	1.96794	2.8165	2.9138	3.68344	4.68527	1.10769	2.87854	3.66349	2.88877	4.7552
4565.02	1.84491	2.79341	1.83501	3.88121	4.5329	0.937276	2.31887	3.55835	2.79108	4.7313
4576.47	1.25359	2.63547	1.90968	4.03226	4.68647	0.873181	2.04181	2.79699	2.79614	4.3867
4587.91	1.20089	2.52946	2.28732	3.81674	4.79722	0.755583	1.38005	3.25442	2.97611	3.70603
4599.36	1.42612	2.51079	2.20224	3.56433	4.8776	0.550665	1.07746	3.72987	2.98915	3.89688
4610.8	0.96939	2.34827	1.87351	3.57977	4.83732	0.488124	1.15287	3.60759	2.60707	3.434
4622.25	0.897188	2.25432	1.77678	3.56167	4.41729	0.326147	0.949977	3.88967	2.24004	2.51542
4633.7	0.989663	1.97063	1.72525	3.52017	4.69739	0.253037	0.910907	3.91874	1.80038	2.21699
4645.14	0.654461	1.78267	1.45638	3.54516	4.80463	0.25829	0.7287	3.83363	1.50706	1.78193
4656.6	0.725756	1.76146	1.454	3.43276	4.66141	0.317314	0.512461	3.87136	1.38663	1.61237
4668.04	0.66467	1.63631	1.25069	3.38608	4.64516	0.405065	0.624202	4.02609	1.40764	1.71439
4679.49	0.380505	1.56109	1.00068	3.07595	3.82056	0.304201	0.576437	3.65211	1.4107	1.8318
4690.93	0.680177	1.23635	0.860031	3.06201	3.88874	0.339745	0.617165	3.48593	1.21377	1.53514
4702.38	0.594415	1.2212	0.774061	3.34529	4.3503	0.377265	0.769567	3.68753	1.62802	1.17804
4713.84	0.500074	1.23056	0.902971	3.38675	4.3323	0.269929	0.763436	3.38645	0.907514	1.43662
4725.26	0.768431	0.928586	0.857428	3.31224	4.58905	0.415317	0.716658	3.34349	0.260323	1.31066
4736.73	0.548787	1.0277	0.951521	3.27575	4.14593	0.497025	0.788806	3.42201	1.40622	0.763492
4748.16	0.570773	1.03102	0.80283	3.32846	4.10336	0.294872	0.919715	3.11661	1.43325	1.11843
4759.62	0.540459	1.00684	0.850158	3.17628	4.48147	0.262413	0.858545	2.7592	1.16579	1.51683
4771.07	0.415746	1.03213	0.904674	3.17822	4.33105	0.270662	0.843049	2.85351	1.21733	1.14148
4782.49	0.558968	0.897536	0.58054	3.21522	4.31759	0.12874	0.838297	2.92973	0.952408	1.04129
4793.99	0.535957	0.951012	0.878795	3.09853	4.58745	0.119841	0.818973	2.96585	0.910804	0.734225
4805.37	0.479257	1.10108	0.865834	3.12075	4.63636	0.131494	0.850022	3.51523	0.644286	0.624249
4816.88	0.306246	1.10234	0.856162	3.027	4.37338	0.153565	0.845508	3.56512	0.390167	0.7665
4828.29	0.466508	1.12161	1.05993	2.97847	4.51891	0.248538	0.994033	3.44934	0.184028	0.610921
4839.72	0.506086	1.23066	0.759716	3.09312	4.5314	0.199302	0.966553	3.59392	-0.0184407	0.847254
4851.25	0.316242	1.20388	0.886747	2.81381	4.47568	0.12419	0.945093	3.53972	-0.258524	0.406183
4862.55	0.518103	1.28502	1.13465	2.75611	4.36776	0.106044	1.02317	3.60434	-0.46286	0.438674
4874.19	0.480484	1.35966	0.977764	2.86513	3.7529	0.0254141	0.924572	3.66151	-0.477356	0.858491
4885.43	0.381638	1.27424	0.996857	2.73684	3.82954	-0.00967167	0.975092	3.86235	-0.462041	0.394662
4897.04	0.47573	1.24213	1.15491	3.03553	4.41198	0.0547585	0.835615	3.44437	-0.289061	0.693355
4908.49	0.427684	1.13203	1.04687	2.79775	4.48149	0.0260927	0.838893	3.08503	-0.35313	0.602997
4919.75	0.443511	1.11009	1.01131	2.52278	4.38344	-0.090335	1.01353	3.62308	-0.390707	0.304724
4931.79	0.539515	1.07679	1.06904	2.75138	4.60544	-0.0949352	0.97004	3.85234	-0.226317	0.73
4942.33	0.244969	0.759882	0.531479	2.32829	4.84339	-0.00259318	1.6878	4.43553	-0.515231	0.699938

## Sheet: plus6grp
Time	Fly1	Fly2	Fly3	Fly4	Fly5	Fly6	Fly7	Fly8	Fly9	Fly10
9.04816	-0.00280016	6.56313e-06	-0.0126086	1.06344e-05	-5.82157e-06	-1.77765e-06	-6.69923e-06	-1.35311e-05	5.72365e-06	2.16517e-06
20.6654	0.00137712	-1.28538e-05	0.0118116	-1.38104e-05	4.9446e-06	6.63592e-06	-1.46854e-06	1.22646e-05	-6.73534e-06	-4.29305e-06
32.0169	0.000971231	1.73446e-05	-0.00667551	1.35545e-05	-1.99683e-06	-1.12384e-05	1.25452e-05	-6.24167e-06	5.8487e-06	5.83102e-06
43.516	-0.00375838	-1.77352e-05	-0.0749995	-8.52007e-06	-2.87164e-06	1.38919e-05	-2.39294e-05	-4.45073e-06	-2.57561e-06	-6.00238e-06
54.9464	0.00651715	1.21768e-05	-0.0233879	-1.55566e-06	8.78595e-06	-1.28671e-05	3.18263e-05	1.80798e-05	-2.95367e-06	4.17668e-06
66.3754	-0.00902804	-9.77082e-08	0.0138112	1.5308e-05	-1.4145e-05	6.97918e-06	-3.2056e-05	-3.11761e-05	9.77681e-06	-1.48155e-07
77.8637	0.00942854	-1.70654e-05	-0.00841297	-2.95344e-05	1.68697e-05	3.7759e-06	2.13337e-05	3.90033e-05	-1.60832e-05	-5.61579e-06
89.2613	-0.00798793	3.55231e-05	0.00442132	3.953e-05	-1.49196e-05	-1.77264e-05	1.22419e-06	-3.66608e-05	1.94833e-05	1.18542e-05
100.751	0.00223353	-4.94551e-05	-0.0014663	-4.0081e-05	7.01199e-06	3.14003e-05	-3.27919e-05	2.0704e-05	-1.75901e-05	-1.66154e-05
112.171	0.00799239	5.21679e-05	-0.000373942	2.70486e-05	6.6185e-06	-3.99695e-05	6.62566e-05	9.06028e-06	8.84302e-06	1.76409e-05
123.626	-0.0282512	-3.80354e-05	0.00168438	7.54925e-07	-2.3667e-05	3.83462e-05	-9.08781e-05	-4.81469e-05	6.60887e-06	-1.30152e-05
135.079	0.105808	4.88497e-06	-0.00183815	-3.99232e-05	3.96869e-05	-2.28284e-05	9.44732e-05	8.69827e-05	-2.62435e-05	1.9699e-06
146.511	0.0547134	4.38103e-05	0.00171015	8.17091e-05	-4.87267e-05	-7.04554e-06	-6.70113e-05	-0.000112078	4.5043e-05	1.43725e-05
157.976	0.0157232	-9.77674e-05	-0.00140042	-0.000112806	4.47523e-05	4.69824e-05	4.97189e-06	0.000109037	-5.61793e-05	-3.25943e-05
169.408	0.122736	0.000140589	0.000921334	0.000118026	-2.3692e-05	-8.74257e-05	8.47206e-05	-6.71426e-05	5.26104e-05	4.72015e-05
180.864	-0.000929686	-0.000152858	-0.000389595	-8.47499e-05	-1.4339e-05	0.000114647	-0.000182715	-1.54106e-05	-2.9417e-05	-5.16484e-05
192.307	-0.0117384	0.000117569	-6.39465e-05	8.34918e-06	6.33278e-05	-0.000113735	0.00025871	0.000127166	-1.36146e-05	4.01541e-05
203.753	0.0150911	-2.70011e-05	0.00037102	0.000102876	-0.000110971	7.32384e-05	-0.000277312	-0.000241809	6.99498e-05	-1.00142e-05
215.204	-0.0146728	-0.000110732	-0.000544949	-0.000225146	0.000140288	9.43497e-06	0.000208117	0.000321031	-0.000125733	-3.61799e-05
226.645	0.0111185	0.000267863	0.000638814	0.000320929	-0.000133517	-0.000123416	-3.82643e-05	-0.00032273	0.0001615	8.92199e-05
238.098	-0.00722359	-0.000398337	-0.000702266	-0.000346132	7.79085e-05	0.000242497	-0.000215785	0.000213949	-0.000156541	-0.000133686
249.541	0.00274249	0.000446078	0.000745749	0.000262576	2.77894e-05	-0.000327762	0.000501675	1.39642e-05	9.55339e-05	0.000150663
260.989	0.000518444	-0.00036014	-0.000727915	-5.36325e-05	-0.000168109	0.000335718	-0.000734196	-0.000332282	2.39002e-05	-0.000122805
272.436	-0.00281022	0.000114353	0.000571816	-0.00026105	0.000309205	-0.000231381	0.000810922	0.000669254	-0.000184955	4.09732e-05
283.882	0.00393757	0.000273463	-0.000203393	0.000617239	-0.000402801	3.84101e-06	-0.000640301	-0.000916837	0.000349463	8.9174e-05
295.331	-0.00382173	-0.00072943	-0.000400605	-0.000909718	0.000396737	0.000320049	0.000177707	0.000952503	-0.00046223	-0.000242959
306.776	0.00277489	0.00112557	0.00117133	0.00101141	-0.000251269	-0.000669283	0.000539601	-0.000674931	0.000463057	0.000377271
318.224	-0.00132645	-0.00130065	-0.00192941	-0.000807718	-4.19863e-05	0.000934637	-0.0013711	4.74438e-05	-0.000305308	-0.000437761
329.67	-1.88177e-06	0.00110077	0.00240284	0.000240697	0.000443813	-0.000989801	0.00207808	0.000861824	-2.27675e-05	0.000372862
341.117	0.000870198	-0.000434572	-0.00228754	0.000647884	-0.000860543	0.000726865	-0.00236451	-0.00185718	0.00048027	-0.000152592
352.564	-0.00116608	-0.000667455	0.00134686	-0.00168855	0.00115323	-0.00010059	0.00195472	0.00262553	-0.000966427	-0.000212304
364.011	0.000979042	0.00200556	0.000465222	0.00258573	-0.00116812	-0.00082827	-0.000698087	-0.00279666	0.00132794	0.000657222
375.458	-0.00052672	-0.00320246	-0.0028931	-0.00296339	0.000785725	0.00186401	-0.00132573	0.00205648	-0.00138551	-0.0010633
386.905	6.61952e-05	0.00376296	0.00533351	0.00246136	2.13942e-05	-0.00268201	0.00373669	-0.000297774	0.000980236	0.00127413
398.352	0.000182157	-0.00322462	-0.00692108	-0.000880232	-0.00114866	0.00289031	-0.00586284	-0.00226214	-4.80997e-05	-0.00113228
409.799	-0.00010138	0.00134773	0.00675071	-0.00167228	0.00234266	-0.00215991	0.00684399	0.00503253	-0.0013099	0.000533005
421.245	-0.00027796	0.00171245	-0.00419727	0.00468517	-0.00320699	0.000380595	-0.00585116	-0.00705096	0.00281864	0.000508354
432.692	0.000850376	-0.00514504	-0.00056288	-0.00717978	0.00340485	0.00220677	0.00249889	0.0076015	-0.00386763	-0.00180608
444.139	-0.00129473	0.00799623	0.00665142	0.00812144	-0.00260259	-0.00486635	0.00304755	-0.00623812	0.00383692	0.00302125
455.586	0.00127964	-0.00948312	-0.0127209	-0.00668252	0.000766324	0.00678039	-0.00977288	0.00333946	-0.00214846	-0.00363826
467.033	-0.000258519	0.0102882	0.0186026	0.00329366	0.00261212	-0.00736871	0.0163728	0.00246812	-0.000281836	0.00320773
478.48	-0.00137467	-0.00966019	-0.0236357	0.00169208	-0.00792484	0.00718901	-0.0204256	-0.0153606	0.00123161	-0.00141959
489.927	-0.000275634	-0.00252375	0.0168695	-0.0116939	0.00780696	-0.00566683	0.0156268	0.016026	-0.00891403	-0.00115538
501.374	-0.00574312	0.00437349	-0.013591	0.014039	-0.0148896	-0.00353279	-0.014079	-0.0382196	0.00371593	0.00312666
512.821	0.00107435	-0.0309988	-0.0156526	-0.0295741	0.00544142	0.00668105	-0.00647743	0.0300412	-0.0124242	-0.00888919
524.267	-0.00699381	0.0403491	0.0403579	0.0238738	-0.0118471	-0.0269116	0.0206794	-0.048762	-0.00274973	0.00825144
535.714	-0.00679347	-0.10047	-0.123088	-0.0477224	-0.00273052	0.0348495	-0.0650177	0.0439515	0.00737434	-0.0134848
547.161	0.0999187	0.300586	0.426208	0.135357	0.278384	-0.0808069	0.20521	0.92675	0.381717	0.00224809
558.608	0.524992	1.27528	1.00918	0.665311	0.703006	0.172346	0.560363	1.76617	1.01367	0.0136323
570.055	0.993408	1.66718	1.15904	0.950729	1.11767	0.846926	1.1757	2.39382	1.28827	0.188469
581.502	1.01433	2.02283	1.68677	1.65957	1.45253	1.04939	1.32734	2.75442	1.69969	0.555706
592.949	1.08629	2.50093	1.96298	2.20117	1.99322	1.41458	1.17493	2.72179	2.0553	0.614151
604.396	1.30522	2.85154	1.98609	2.5771	2.20191	1.96443	2.10864	2.73109	2.37587	0.838428
615.842	1.42096	3.20032	1.97465	3.35193	2.02255	2.36293	2.60421	2.87246	2.80415	1.2706
627.289	1.74216	3.46675	2.12451	3.60243	2.37602	3.04056	2.81173	3.0474	2.79106	1.52984
638.736	1.90045	3.77945	2.4618	3.9758	2.62095	3.71696	3.04566	3.15827	3.2232	1.98335
650.183	1.91157	3.64622	2.65031	4.59994	2.81058	4.14747	3.03733	3.22249	3.82447	2.41352
661.63	2.03141	3.3382	3.01556	5.07734	3.09922	4.09778	3.31851	3.21164	4.1319	2.734
673.077	1.96578	3.44023	3.2777	5.46142	3.13807	4.26265	3.09325	3.2286	4.38972	2.99636
684.524	1.98978	3.38475	3.29702	5.59116	3.29254	4.82313	3.19201	3.19037	4.48639	3.05084
695.971	2.05974	3.11188	3.53893	6.0302	3.23025	4.73413	3.46472	3.1685	4.67917	3.31468
707.418	2.00619	2.9392	3.60222	6.35838	3.2904	4.90102	3.31177	3.33953	4.78146	3.49231
718.864	1.90425	3.14039	3.40114	6.40799	3.31136	5.25629	3.409	3.4607	4.94033	3.38377
730.311	1.78024	3.17557	3.44335	6.42322	3.32576	5.43787	3.14327	3.4337	5.0915	3.61916
741.758	1.82342	3.03777	3.63194	6.49993	3.76921	5.54219	3.06788	3.33376	5.26573	3.66044
753.205	1.73913	3.39427	3.80461	6.85639	3.58221	5.26874	3.01201	3.23175	5.59612	3.72236
764.652	1.50364	3.38043	3.7384	6.81672	3.55009	5.8109	2.52677	3.20135	5.50624	4.05118
776.099	1.49341	3.35204	3.57306	6.79988	3.58218	6.1187	2.68796	3.21099	5.43658	4.04827
787.546	1.69768	3.48358	3.72787	6.85872	3.15108	5.78494	2.61674	3.15835	5.71279	4.2536
798.993	1.75881	3.36973	4.01949	6.55014	3.39196	5.75797	2.44424	3.10652	5.65605	4.37004
810.44	1.7443	3.3659	3.98501	6.4326	3.23421	5.94331	2.67096	3.00382	5.59642	4.35603
821.886	2.02395	2.95784	3.78142	6.27887	2.97572	6.26694	2.59614	2.8472	5.47797	4.32176
833.333	2.08415	2.97362	3.88059	6.13765	3.2064	6.15478	2.62107	2.89941	5.25735	4.14502
844.78	1.94432	3.24522	3.93609	5.70305	3.0793	6.22673	2.52113	2.78507	5.45931	4.21106
856.227	2.12515	3.1158	4.0482	5.20181	3.03295	5.78297	2.362	2.52301	5.12199	4.26413
867.674	2.07335	3.27579	4.18334	5.2472	2.81262	5.23388	2.46386	2.68019	4.77113	4.31603
879.121	2.03257	3.45489	4.09586	4.84211	2.48934	5.84435	2.34123	2.51587	5.10207	4.22654
890.568	2.22262	3.18131	4.0232	4.26311	2.27433	5.8355	2.17355	2.25052	5.04754	4.20494
902.015	2.01561	2.84024	3.89925	3.9242	1.91726	5.74338	2.23448	2.51904	4.58831	3.95945
913.462	1.95146	3.19739	3.9513	3.51363	1.49175	5.31138	2.28735	2.55667	4.67001	3.44538
924.908	1.95139	3.00267	4.161	3.17725	1.17778	4.81498	2.27206	2.28824	4.90388	3.23858
936.355	1.77801	2.50438	4.18943	2.97201	1.17725	5.23454	2.25598	2.52431	4.63679	2.91372
947.802	1.68979	2.72913	3.9316	2.98335	1.21459	4.63057	2.19789	2.69904	4.89032	2.63687
959.249	1.36193	2.66844	3.83067	3.00721	1.24577	4.03473	2.05293	2.17346	4.19432	2.52194
970.696	1.26481	2.56712	3.83956	2.8614	1.07332	3.61336	2.04168	2.3441	3.36296	2.43206
982.143	1.1928	2.36464	3.78727	2.6844	0.834978	2.77094	2.10908	2.17834	4.27847	2.36935
993.59	0.95743	2.23134	3.8567	2.73232	0.902361	2.14479	2.00671	1.72063	4.23951	2.36124
1005.04	0.828419	2.44764	3.53667	2.98184	0.803906	1.27894	1.88484	2.46929	3.93603	2.31525
1016.48	0.440942	2.40302	3.29985	3.0668	0.665315	0.61157	2.06984	2.67112	4.16221	2.26689
1027.93	0.20199	2.44585	3.22972	3.16807	0.773141	0.173481	2.20971	2.56303	3.81663	2.04078
1039.38	0.206124	2.54984	2.90324	3.33981	0.759858	0.209341	1.97239	2.35933	3.78827	1.50099
1050.82	0.226435	2.47459	2.86685	3.40199	0.67643	0.600593	2.11666	2.23947	3.72298	1.27328
1062.27	0.197689	2.49577	2.92558	3.59158	0.606662	0.623257	2.0699	2.30388	3.186	1.14543
1073.72	0.192098	2.50235	2.58072	3.74778	0.383613	0.913161	1.72212	2.12076	3.0312	1.03206
1085.16	0.18247	2.5387	2.20673	3.85958	0.293768	0.991719	2.01766	2.24577	2.96216	0.908103
1096.61	0.116896	2.59424	2.02899	3.9348	0.421516	1.10577	2.06345	2.07179	2.27438	0.626585
1108.06	0.278311	2.47062	1.60871	4.01654	0.428401	1.79452	1.86103	2.36466	1.78455	0.629343
1119.51	0.349398	2.50292	1.56063	4.21668	0.456996	2.00453	1.82445	2.17988	1.71385	0.726852
1130.95	0.358509	2.36278	1.73112	4.26419	0.615773	2.2897	1.83522	1.48505	1.46074	0.731315
1142.4	0.56287	2.03846	1.64622	4.27842	0.616948	2.60435	1.70407	1.84724	1.39996	0.641205
1153.85	0.588843	2.06439	1.81137	4.28458	0.653323	2.54226	1.46113	1.57571	1.50055	0.477826
1165.29	0.527618	1.94164	1.75896	4.35513	0.701479	2.72703	1.76256	0.958634	1.46571	0.414559
1176.74	0.497166	1.92896	1.85868	4.40881	0.680456	3.04682	1.77883	1.19197	1.42856	0.318885
1188.19	0.445765	1.92864	1.70726	4.38585	0.892364	3.09855	1.6107	1.89945	1.27951	0.0280038
1199.63	0.580961	1.90185	1.43642	4.56549	0.709147	2.99163	1.61873	2.21231	1.15519	-0.278254
1211.08	0.602901	2.18471	1.85557	4.54521	0.40971	3.10084	1.64363	2.1706	0.906685	-0.435332
1222.53	0.419513	1.99962	1.8782	4.16389	0.465792	3.15667	1.55374	2.12561	0.344199	-0.368028
1233.97	0.39528	1.88288	2.17376	3.93527	0.357149	2.93617	0.686678	1.6265	0.047225	-0.159127
1245.42	0.388453	2.04094	2.45142	3.82505	0.317366	2.69723	0.509684	1.64014	-0.0867284	0.0231431
1256.87	0.277325	1.92929	2.33277	3.33467	0.27242	2.71902	1.4288	2.1787	-0.248674	0.209403
1268.31	0.243736	1.92847	2.40131	2.91602	0.15842	2.61491	1.8515	2.11069	-0.142022	0.416372
1279.76	0.174159	2.06879	2.02751	3.11495	0.231039	2.21189	1.04104	1.90422	-0.201263	0.623034
1291.21	0.104589	2.08393	2.02413	3.15578	0.298282	2.32162	0.767218	2.00627	-0.279412	0.745797
1302.66	0.10179	1.975	2.4741	2.74676	0.302243	2.09775	1.64347	2.16452	-0.130283	0.822423
1314.1	0.123972	1.92088	2.68796	2.54834	0.463123	1.53829	1.692	2.19474	-0.305897	0.997149
1325.55	0.155801	1.84661	2.50226	2.46977	0.446129	1.42472	1.41056	2.07525	-0.357268	1.03224
1337	0.0418532	1.75953	2.20638	2.26424	0.291349	0.974424	1.6223	1.89549	-0.177784	0.993773
1348.44	0.117157	1.65542	2.29408	2.15221	0.429997	0.674392	1.64002	1.84073	-0.198463	1.15753
1359.89	0.276215	1.46425	2.06153	1.91652	0.368108	0.252556	1.50611	1.861	-0.171455	1.18947
1371.34	0.153994	1.48521	1.86049	1.72372	0.320487	-0.106241	1.71866	1.92187	-0.157878	1.18684
1382.78	0.199692	1.45662	1.71777	1.79834	0.34205	0.123827	1.75731	1.86996	-0.177992	1.30352
1394.23	0.282727	1.15083	1.48334	1.7054	0.0676825	-0.243321	1.67044	1.83467	-0.0753707	1.34137
1405.68	0.180653	1.23113	1.52918	1.93858	0.0606364	-0.386352	1.77549	1.94677	0.0168774	1.35409
1417.12	0.252606	1.0911	1.34635	2.29058	0.0406122	-0.231008	1.83219	1.76473	-0.00968723	1.34145
1428.57	0.26527	0.589722	1.27166	1.6576	-0.136054	-0.269663	1.8943	1.66915	0.0125671	1.40597
1440.02	0.165618	0.859323	0.90197	1.47803	0.0328298	-0.0455287	1.5748	1.62456	0.0707469	1.40008
1451.47	0.268317	0.906019	0.487217	2.17082	0.317832	-0.0227873	1.83465	1.35453	0.0591972	1.37076
1462.91	0.246403	0.704893	0.380614	2.26702	0.408753	0.187165	2.1254	1.29435	0.0559929	1.38658
1474.36	0.131859	0.770493	-0.106708	2.31079	0.450655	0.134601	1.85255	1.13374	-0.0128382	1.20282
1485.81	0.195088	0.552558	-0.256863	2.27032	0.573069	-0.0201926	2.18089	1.1079	-0.000964765	1.12514
1497.25	0.184431	0.537941	-0.0820395	2.09973	0.609401	-0.0326204	1.89649	1.29522	0.0798442	0.864315
1508.7	0.137945	0.607429	0.0735213	2.27358	0.896836	-0.256018	1.89096	1.31017	0.0210139	0.377227
1520.15	0.237916	0.720989	0.101434	2.23806	1.11307	0.0213936	2.10745	1.34032	-0.00871899	0.124915
1531.59	0.144287	0.675409	0.125278	2.29439	1.05944	-0.0423473	1.32058	1.51897	0.00207684	-0.189894
1543.04	0.0939728	0.453156	0.019586	2.58146	1.43297	-0.254071	1.47724	1.70904	0.00241031	-0.441721
1554.49	0.409044	0.752095	-0.276812	2.70173	1.53495	-0.0103441	1.59807	1.40778	-0.00557562	-0.392593
1565.93	0.25416	1.02205	0.218396	2.96274	1.49898	0.155784	1.41068	1.45356	0.0062911	-0.241015
1577.38	0.21862	1.37204	0.78809	3.2562	1.80856	0.168795	1.94145	1.75021	-0.00181943	-0.108132
1588.83	0.571701	1.76604	0.963781	3.20023	1.81729	-0.0280572	2.14537	1.5826	-0.0745826	-0.0235244
1600.27	0.56629	2.08677	1.178	3.25665	1.78105	-0.0108268	2.15087	1.7243	-0.0267624	0.0528915
1611.72	0.666919	2.54651	1.24215	3.37022	2.05967	0.0242531	2.08623	1.85351	0.0141371	0.101288
1623.17	0.893864	2.67322	1.23837	3.10583	2.33473	-0.0392726	2.02346	1.97709	-0.00717974	0.0812563
1634.62	1.08122	3.07582	1.30465	3.45068	2.38806	0.0342557	1.82594	2.03936	0.00223737	0.113307
1646.06	1.08378	3.4372	1.55306	4.20363	2.84649	-0.0538824	1.95967	2.00062	0.000388002	0.0843091
1657.51	1.25358	3.49998	1.77714	4.12941	3.06677	0.0959732	2.47626	2.25447	-0.00177769	0.0476626
1668.96	1.18894	3.77215	1.98779	4.30709	3.28892	0.564659	2.44382	2.47651	-0.00123171	0.152147
1680.4	0.613052	3.81999	2.29494	4.60074	3.41248	0.865255	2.55625	2.5628	0.00399365	0.192256
1691.85	0.761415	3.5447	2.6629	4.20603	1.79598	1.28005	2.48277	2.22358	-0.0135017	0.226837
1703.3	0.840028	3.53002	2.93081	4.64339	2.43404	1.8446	2.20165	2.28084	0.0162759	0.31852
1714.74	1.16418	4.01	2.99838	5.02019	4.57481	2.21798	2.46121	3.10167	0.0659674	0.54836
1726.19	1.97642	4.20151	3.14518	4.99086	4.53325	2.55338	2.99284	3.15714	0.171687	0.630134
1737.64	2.05158	4.08564	3.25271	5.26557	4.8822	2.91766	3.25178	1.99981	0.275155	0.560223
1749.08	2.25119	3.96934	3.40091	4.98348	4.90889	3.35202	3.30504	1.54392	0.341677	0.792929
1760.53	2.37226	3.9654	3.58401	5.01819	4.69151	3.86969	3.59477	2.34334	0.610084	0.981934
1771.98	2.27817	4.18677	3.52987	5.04476	5.519	4.24533	3.17865	3.49099	0.937541	1.14532
1783.42	2.49788	4.39138	3.56311	5.07771	5.93943	4.86078	3.15825	4.19546	1.22452	1.42376
1794.87	2.53734	4.18561	3.63262	5.03552	6.03544	5.22011	3.84359	3.83187	1.38447	1.76981
1806.32	2.64164	3.72207	3.61357	4.4982	6.2466	5.29357	3.85671	4.33162	1.58104	2.02717
1817.77	2.61373	4.25495	3.71507	4.87773	6.6913	5.91273	4.11557	4.39932	1.82588	2.08293
1829.21	2.45917	4.94496	3.64998	4.85332	6.58156	6.20788	4.24489	3.22935	1.88275	2.26047
1840.66	2.62333	4.65833	3.37944	4.78944	6.39304	6.14245	4.17566	4.26604	2.08719	2.49116
1852.11	2.51902	4.48544	3.21504	4.55764	6.86743	6.20066	4.44559	5.05322	2.14309	2.69004
1863.55	2.36453	4.71744	3.23447	3.70852	6.5591	6.54713	4.41957	4.58448	2.14737	2.90634
1875	2.29639	4.66832	3.42509	4.67332	6.55749	6.85936	4.50988	4.51663	2.66454	3.34986
1886.45	2.07325	4.81919	3.36272	5.19815	7.05923	6.86417	4.55384	4.34079	3.03933	3.66248
1897.89	1.90085	5.06988	3.12064	4.90948	7.08752	7.57298	4.50555	4.7696	3.06997	3.81882
1909.34	1.48984	4.99553	3.45186	4.99103	7.18779	7.80647	4.76552	4.9049	3.36326	4.08296
1920.79	1.40119	5.27666	3.72435	4.60069	7.11236	7.43252	4.7736	4.56915	3.39866	4.21709
1932.23	1.49131	5.45867	3.64919	4.65263	7.32355	7.37937	4.63107	4.64586	3.32731	4.5723
1943.68	0.917438	5.56372	3.74192	4.86209	7.50244	7.2228	4.64172	4.92474	3.51834	4.54899
1955.13	0.695692	5.43934	3.73154	5.10361	7.51269	6.90483	4.81025	4.73714	3.35413	4.64014
1966.58	0.71411	5.04859	3.85889	5.14039	7.76866	6.60642	4.94688	4.6981	3.83673	5.25657
1978.02	0.323204	5.23656	4.17467	4.89162	7.7397	6.72342	5.03044	4.99899	4.26404	5.2452
1989.47	0.29173	5.39737	4.44106	5.05203	7.6854	5.09335	5.07681	4.54199	3.55945	5.14442
2000.92	0.412684	5.83647	4.20066	5.09262	7.74809	4.47907	4.96243	4.56068	3.57015	5.32481
2012.36	0.473853	6.18365	3.97116	5.13063	8.02376	6.56717	5.05334	4.70398	4.08249	5.58277
2023.81	0.781551	6.01037	4.4395	5.15099	7.89107	6.60412	5.11493	4.53694	3.86142	5.56826
2035.26	0.866131	6.3094	4.05528	4.9682	7.64994	6.11208	5.21932	4.65977	3.69787	5.4844
2046.7	0.809579	6.54539	3.92965	5.01033	8.22762	5.97587	5.35008	4.40742	3.6129	5.58493
2058.15	1.06148	6.60828	4.88187	4.8248	8.06813	5.12487	5.10475	4.76981	3.29161	5.76766
2069.6	1.28835	6.3741	5.02289	4.21558	8.13158	5.07443	5.08696	4.07857	3.29883	5.99021
2081.04	1.36654	6.15049	4.7158	3.64726	8.27396	5.38943	5.26389	3.16981	3.38449	5.95972
2092.49	1.53482	6.39507	4.83809	3.21686	7.60341	5.49529	5.48439	4.21534	3.21453	6.21425
2103.94	1.76537	6.38656	5.14314	3.21663	8.22817	5.46828	5.43024	4.13993	3.02772	6.12196
2115.38	1.80759	7.00532	5.03185	3.32834	8.61353	6.18496	5.49209	3.92871	2.92834	6.36218
2126.83	1.65569	7.36388	5.08909	3.10247	8.4034	6.51306	5.62622	4.29071	2.94464	6.65084
2138.28	1.66902	7.12202	5.22565	2.78185	8.3738	5.57169	5.2075	4.09686	2.70132	6.4536
2149.73	1.7774	7.38452	4.97738	2.29595	8.20962	6.40373	5.51426	4.012	2.49286	7.07207
2161.17	1.69759	7.18073	4.95767	1.93236	8.39242	7.19976	5.00654	3.83894	2.62633	5.88298
2172.62	1.64695	7.25306	4.9793	1.87084	8.40987	6.88678	4.06457	4.03443	2.77062	5.41193
2184.07	1.63273	7.64608	4.88037	1.92515	8.61153	7.15353	5.00015	3.98196	2.95214	6.93731
2195.51	1.47559	7.43811	4.68901	1.86378	8.83252	7.12391	5.76864	3.88405	2.97851	6.771
2206.96	1.56392	7.33486	4.67966	1.80214	8.7997	7.29936	5.82681	3.9812	3.09287	6.75006
2218.41	1.8859	7.36152	4.66656	2.05625	8.36269	7.15998	5.98225	3.80519	3.15688	7.08601
2229.85	2.13974	7.35567	4.48114	2.0974	8.01133	6.36273	6.02809	3.85969	3.18718	6.99378
2241.3	2.21808	7.4221	4.17773	2.17955	8.35027	5.86649	6.08374	3.78551	3.36736	6.91982
2252.75	2.37244	7.45192	3.92293	2.38975	8.42576	5.7911	6.36332	3.82895	3.4631	7.00831
2264.19	2.82309	7.13241	4.11723	2.15318	8.51734	5.41389	6.37145	3.88505	3.8738	6.92401
2275.64	2.82958	7.05054	4.16888	2.38003	8.37894	4.93501	6.1913	3.81236	4.10063	6.84202
2287.09	2.95111	7.363	3.97368	2.27188	8.24245	4.6562	6.46854	3.74922	4.17609	6.96677
2298.53	3.32395	7.22294	3.83982	1.92962	8.53964	3.8546	6.7308	3.84198	4.18241	6.73464
2309.98	3.30549	7.47697	3.90166	2.72394	8.3713	2.95839	6.74517	3.98364	4.23893	7.00782
2321.43	3.60878	7.73519	3.94334	2.81412	8.05291	2.12057	6.69005	3.7802	4.484	6.9205
2332.88	3.34486	7.22543	3.76587	2.52251	8.02164	2.15625	6.72584	3.96049	4.49617	6.67011
2344.32	3.32449	7.11867	3.80806	2.52351	8.35238	2.64084	6.88179	3.45598	4.65387	6.70117
2355.77	3.37999	7.24715	3.74753	2.03168	8.40549	2.23535	7.13947	3.14989	4.4347	6.21492
2367.22	2.57837	7.32049	3.75995	1.89336	8.09789	2.24951	7.25348	4.16932	4.5476	6.26672
2378.66	2.817	7.37177	3.90202	2.1477	8.18581	2.42017	7.21777	4.14124	4.7145	6.22184
2390.11	2.72604	7.41973	3.89317	2.51268	8.57894	2.18124	7.39374	3.86121	4.26146	6.15243
2401.56	2.70617	7.57707	4.12326	2.51644	8.7218	2.16135	7.11143	4.14755	4.54611	6.39602
2413	2.77051	7.46035	4.07958	2.10258	8.42422	2.09562	7.03078	3.94873	4.61217	6.23746
2424.45	2.49753	7.60345	3.94651	1.97928	8.32586	2.54815	7.322	3.93256	4.4337	6.13683
2435.9	2.68398	7.59995	3.95205	1.84739	8.58715	3.09797	7.26649	4.18311	4.86821	5.77876
2447.34	1.76866	7.23329	3.96751	1.47801	9.13934	3.22141	7.62704	4.01639	4.91109	5.32555
2458.79	1.80392	7.37216	4.05979	1.3897	8.91667	3.61825	7.699	3.98177	4.86618	5.21842
2470.24	2.42364	7.30084	4.0078	1.63802	8.60618	3.76345	7.51153	4.26095	5.41843	5.37849
2481.68	2.32696	7.17177	4.19004	1.52821	9.06872	3.80469	7.6152	4.1492	5.67512	5.46274
2493.13	2.78129	7.31666	4.35188	1.11392	7.73597	4.2313	7.49365	4.00027	5.97388	5.51766
2504.58	2.86741	7.2477	4.39155	1.11712	7.38609	4.80548	7.65445	4.1699	5.83556	5.50407
2516.03	2.59083	7.46697	4.46027	1.3872	9.00394	5.22694	7.99741	4.34387	5.26373	5.35124
2527.47	2.85425	7.70508	4.38845	1.47274	8.60035	5.46186	7.82517	4.34523	6.12081	5.59848
2538.92	3.02001	7.58327	4.38445	1.61941	8.10505	5.36877	7.66908	4.36892	6.50382	5.7715
2550.37	2.5456	7.36741	4.37304	1.20803	8.48328	5.14661	7.97264	4.39308	6.31943	5.93321
2561.81	2.94717	7.26959	4.35558	0.783357	8.29258	5.25505	7.66126	4.37483	6.66237	5.89599
2573.26	3.48662	7.40497	4.50636	1.66266	7.96082	4.2538	7.20091	4.54868	6.5354	5.90727
2584.71	3.32852	7.57582	4.44536	2.35234	7.63055	3.25648	7.84281	4.34469	6.54367	6.06346
2596.15	3.3774	7.75494	4.2978	2.28698	7.30014	3.2286	7.88629	4.36796	6.54354	5.81191
2607.6	3.35994	7.65668	4.57294	2.60371	7.43138	2.45962	7.53316	4.61546	6.42952	5.96785
2619.05	3.38429	7.64847	4.64887	2.98405	7.62418	1.8352	7.74275	4.5316	6.42197	5.8051
2630.49	3.22677	7.914	4.75254	3.14327	7.46255	1.14517	6.62133	4.6094	6.46315	5.69716
2641.94	3.13592	7.75646	4.83022	3.46256	7.51276	0.732451	5.12382	4.57631	6.29293	5.90475
2653.39	3.17401	7.40614	4.64183	3.59208	7.46593	1.07338	5.49284	4.83147	5.58591	5.79415
2664.84	3.17513	7.61417	4.80548	4.02024	7.22097	1.47108	7.01112	4.21181	5.26879	5.99352
2676.28	3.19475	8.14851	4.84112	4.32506	6.96475	2.26235	7.77472	3.63346	5.01185	5.554
2687.73	2.92081	7.67261	4.94913	3.66201	7.08732	2.70648	7.65765	4.72845	4.83922	5.23364
2699.18	2.70498	7.51444	4.86066	4.03137	7.41754	3.40304	7.50486	5.03525	5.05139	5.20433
2710.62	2.48422	8.12728	4.77695	4.40751	7.4522	3.87037	7.35648	4.84729	5.21935	4.87386
2722.07	2.31176	7.9951	5.15739	3.55223	7.39404	3.79871	7.57703	5.02802	5.51969	4.98825
2733.52	2.10673	8.16005	5.01649	3.68469	7.08869	4.13984	7.60933	5.14045	5.03733	4.72027
2744.96	1.64209	8.29329	4.90209	4.00304	7.37921	4.76668	7.55724	5.28745	4.52504	4.42512
2756.41	1.29314	8.02212	4.91749	3.68102	7.33811	4.94878	7.84491	5.26505	4.76513	4.27183
2767.86	1.21397	8.15146	4.7857	3.88166	6.70927	5.10924	7.67032	5.40211	4.90443	4.01747
2779.3	1.25195	8.35432	4.91759	4.04322	7.02958	5.73417	7.75514	5.45495	4.79857	4.25797
2790.75	1.0212	8.20871	4.98302	3.53427	6.98452	2.90111	7.46216	5.36707	4.60518	4.43682
2802.2	1.11939	7.97859	4.96125	3.64217	6.77353	1.7826	6.97829	5.43463	4.86835	4.45244
2813.64	1.27413	8.14902	5.05326	4.08227	7.12135	5.0089	7.58719	5.54084	4.8807	4.67473
2825.09	0.896592	7.71941	4.98344	3.91642	7.27769	5.49879	7.31398	5.69713	4.82179	4.61657
2836.54	1.06218	7.63006	4.88999	4.02753	7.21354	5.28081	7.24084	5.9099	4.9444	4.41067
2847.99	1.40083	8.21895	4.69242	4.11212	7.09822	5.56428	7.76529	5.90872	4.60957	4.61711
2859.43	1.32059	7.87604	4.42172	3.97992	7.00044	5.83437	7.23642	5.85024	4.68912	4.96761
2870.88	1.36432	7.98875	4.44076	3.59299	6.94393	6.37709	7.25009	5.9649	4.7344	4.97781
2882.33	1.46576	7.97879	4.50452	3.0408	7.1998	6.46323	7.45429	6.02123	4.57034	4.98491
2893.77	1.40596	7.56445	4.5777	2.70049	7.35086	6.33739	7.48251	6.22252	4.53988	5.32331
2905.22	1.46324	7.99595	4.55062	2.2068	7.44865	5.84924	7.45214	6.39214	4.36702	5.17551
2916.67	1.56858	7.66019	4.39724	1.95951	7.2281	5.7378	6.86859	6.36152	4.21839	5.20877
2928.11	1.4457	7.56887	4.21865	1.88581	7.17267	5.51416	7.22468	6.09134	4.1849	5.36297
2939.56	1.54694	7.38177	4.17432	2.02863	7.60378	5.08091	7.61304	6.06212	4.54506	5.28397
2951.01	1.46024	6.41929	4.22066	2.30695	6.90774	4.96668	7.31258	6.33373	4.29433	6.02423
2962.45	1.5477	7.25063	3.98851	2.51195	6.90269	5.21401	7.52554	6.15246	4.17448	5.66238
2973.9	2.00726	7.56208	3.84049	2.72001	7.7517	4.99577	7.44131	6.09692	5.20272	5.36914
2985.35	1.90102	7.03816	4.10558	2.78147	7.83748	4.41083	7.30463	6.34918	5.28901	6.41484
2996.79	2.30072	7.26132	4.29754	3.16089	7.98607	4.55636	7.55802	6.08513	4.99771	6.68017
3008.24	2.6917	6.76533	4.24505	3.54962	7.95937	4.83945	7.4777	5.72316	5.43073	6.69576
3019.69	2.63921	6.62982	4.45998	3.69876	7.89428	4.52333	7.75661	6.18023	5.57663	6.88421
3031.14	3.06796	6.74408	4.13149	3.55417	7.86584	3.6939	8.01309	6.19179	5.4643	7.19093
3042.58	3.10668	6.36609	3.81904	3.44431	8.01657	3.71836	7.70615	5.97999	5.49399	7.21206
3054.03	2.94731	6.3258	4.52975	3.70784	8.29955	3.92956	7.76429	6.47941	5.60493	7.50066
3065.48	2.78781	6.10528	4.55277	3.82877	8.20802	3.24896	7.77638	6.64186	5.65969	7.67488
3076.92	2.86528	5.81332	4.48028	3.76468	8.13571	3.00727	7.58394	6.81266	5.73808	7.97562
3088.37	3.08046	5.65664	4.6514	3.65546	8.02528	3.32693	7.6381	6.9738	5.78362	8.45627
3099.82	2.79684	5.35955	4.59814	3.65285	8.12162	3.45715	7.59002	7.0807	5.85022	7.16226
3111.26	3.07728	5.20713	4.75298	3.54949	8.39032	3.61037	7.43075	6.96472	5.71001	7.38291
3122.71	3.38299	5.09938	4.73494	3.32598	8.34493	3.85894	7.44812	6.88283	5.65678	8.23222
3134.16	2.92784	4.77207	4.86989	3.32315	8.1826	3.8286	7.52779	6.90455	5.72184	7.86111
3145.6	2.5894	4.56268	4.9071	3.44063	8.18313	4.12554	7.41131	6.64738	5.40201	8.17889
3157.05	2.26549	4.14206	4.90956	3.33351	8.35443	4.18179	7.4695	7.06601	5.54355	7.7263
3168.5	2.0594	3.71954	4.90013	3.26217	8.34324	3.88848	7.52247	6.65512	5.35599	7.62031
3179.94	2.42256	4.09254	4.6048	3.43625	8.28884	4.24733	7.34158	6.15581	5.14667	7.78665
3191.39	2.16129	3.98907	4.67239	3.57531	8.18558	4.39366	7.62312	6.74228	5.09294	7.25879
3202.84	1.79475	3.57031	4.93034	3.95965	8.06881	4.77211	7.47812	6.73511	4.65329	7.38954
3214.29	2.27063	3.75114	4.94772	4.16417	8.29453	4.64994	7.39556	6.43475	4.70398	7.38289
3225.73	2.20078	3.60681	4.95498	4.18251	8.34357	4.00441	7.53259	6.5287	3.50475	6.97813
3237.18	2.34834	3.41318	5.08272	4.0867	8.40585	4.97917	6.87123	7.1278	3.374	6.89598
3248.63	2.78054	3.47284	4.90107	3.59128	8.31476	5.24733	7.30362	7.2332	4.13028	6.90316
3260.07	2.64234	3.45524	4.72459	3.15526	8.15173	4.88725	7.66289	7.56681	3.58127	6.7061
3271.52	2.68052	3.43162	4.62887	2.99359	8.07174	5.18541	7.40225	7.44404	4.03991	6.49062
3282.97	2.88202	3.46374	4.49602	3.65631	7.56246	5.0031	7.72751	7.50814	4.22875	6.47965
3294.41	3.53615	3.24296	4.69478	4.13096	7.82041	5.1874	7.64832	7.28974	4.24746	6.25258
3305.86	3.89709	2.80606	4.90993	3.79251	8.16607	5.32143	7.6274	5.62387	3.6205	5.84883
3317.31	4.10654	3.2372	5.03893	3.61425	7.88619	5.19809	7.24698	7.29552	3.47041	5.53722
3328.75	4.16769	3.45143	4.92056	3.43836	7.9567	5.02848	6.91634	8.54013	4.31264	5.34431
3340.2	3.67046	3.18832	5.02766	3.33578	7.78295	4.48422	7.11526	7.67278	3.36873	5.50783
3351.65	4.16478	3.09948	5.0866	3.20931	7.42447	4.3913	6.86117	8.12922	3.65297	5.0838
3363.1	3.80808	2.63597	4.80291	3.11528	7.55857	4.67153	6.83532	8.01721	4.52378	4.56222
3374.54	3.46202	3.05506	4.79956	3.01912	7.68831	4.67301	6.88037	7.83914	4.46095	4.91921
3385.99	4.41205	3.44327	4.74404	2.80846	7.39729	5.33407	6.62061	7.92007	4.76858	4.76978
3397.44	4.17209	3.37614	4.69068	3.10604	7.30185	5.41028	6.65022	7.74564	4.71322	4.54637
3408.88	4.32206	3.58006	4.50377	3.10302	7.48714	3.84339	6.64232	7.57791	4.59733	4.6927
3420.33	4.53058	3.48289	4.66816	2.77642	7.27493	3.91439	6.46883	7.52354	4.24185	4.58209
3431.78	4.22812	3.72318	5.00079	2.87188	7.12359	4.32959	6.58373	7.41496	4.48565	4.78676
3443.22	4.4986	3.63207	4.75325	2.61453	7.20291	3.4905	6.56575	7.32531	5.00523	5.02675
3454.67	4.23044	3.45281	4.622	2.83031	7.01453	3.33938	6.51144	7.45132	4.88537	4.90788
3466.12	4.06425	3.64387	4.49997	2.78957	7.12901	3.18489	6.60653	7.40457	5.06835	4.98743
3477.56	4.23887	3.58707	4.32599	1.92146	7.24397	2.93896	6.42156	7.16495	5.2165	5.1283
3489.01	4.25808	3.56788	3.97762	2.42055	7.05049	2.91369	6.73817	7.14185	5.37839	5.0264
3500.46	4.31935	3.6291	3.65246	3.06781	7.25854	2.73096	6.83756	7.27162	5.51362	5.10338
3511.9	4.18201	3.59797	3.56348	3.25096	6.96666	2.57071	6.5024	6.97003	5.47155	5.0849
3523.35	4.20009	3.55625	3.3208	3.21597	6.78401	2.67106	6.89636	7.03845	5.62851	4.96428
3534.8	4.27473	3.84959	3.28963	3.09354	6.76063	2.57303	7.02882	7.10381	5.54768	4.98328
3546.25	4.11938	3.57961	3.13511	2.71883	5.95098	2.44395	6.99843	6.83566	5.44288	4.8495
3557.69	4.21802	3.55963	2.97962	1.70238	6.25481	2.67444	7.00308	6.91848	5.67629	4.9712
3569.14	4.10503	3.72407	3.1484	1.94114	6.73489	2.58595	6.87667	6.93143	5.37026	5.15769
3580.59	3.87525	3.27358	3.22023	2.3728	6.59094	2.57416	6.74165	6.94179	4.53817	4.9199
3592.03	4.00695	3.91948	3.4477	2.43157	6.44549	2.53817	6.58714	6.50029	4.69283	4.48898
3603.48	3.68904	4.01303	3.50453	2.39734	6.02282	2.34855	6.79254	6.17141	5.14337	4.14093
3614.93	3.42643	3.52758	3.34218	2.44482	5.96665	2.39858	6.71288	6.14779	4.84677	3.92
3626.37	3.38498	3.71096	3.6093	3.04626	5.77045	2.31105	6.86611	5.55274	4.50669	3.4382
3637.82	3.16452	3.67706	3.68276	2.82696	5.53249	1.99816	7.02848	5.48625	4.12051	3.07894
3649.27	3.24888	3.67335	3.67656	2.8996	5.44684	1.4712	6.68782	5.38228	3.83727	2.8852
3660.71	3.35575	3.57236	3.84761	3.32169	5.35301	1.06963	6.69523	4.87175	3.55634	2.49448
3672.16	3.25025	3.45621	3.74699	3.3337	5.41384	0.586579	6.62322	4.73355	3.04922	2.13598
3683.61	3.09381	3.53762	3.73109	3.51466	5.36069	0.226056	6.91452	4.47292	2.68953	1.64719
3695.05	3.23866	3.59232	3.44626	3.46068	5.39385	-0.129335	6.93454	4.67426	2.39095	1.28697
3706.5	3.2485	3.52909	3.11038	3.51712	5.50979	-0.632964	6.4512	4.65641	2.40995	1.04606
3717.95	3.08909	3.58414	3.07849	3.58501	5.49187	-0.522663	6.59533	4.34706	2.49938	1.03422
3729.4	3.33933	3.65826	2.96313	3.64668	5.53019	-0.675659	6.78365	4.61874	2.47444	1.31711
3740.84	3.33231	3.57471	2.85283	3.65275	5.58989	-0.778465	6.65431	4.5563	2.55382	1.33598
3752.29	3.13748	3.75668	2.9031	3.38166	5.54568	-0.603055	6.49443	4.5776	2.63312	1.3068
3763.74	3.16134	3.80413	3.29742	3.44522	5.72815	-0.547803	6.71534	4.90059	2.6092	1.44416
3775.18	3.20624	3.76271	3.338	3.4187	5.81635	-0.220161	6.65734	4.85382	2.3938	1.49189
3786.63	3.07638	3.93878	3.44889	3.15609	5.72182	-0.195315	6.89477	4.68157	2.40774	1.23018
3798.08	2.9572	3.54809	3.9911	2.9977	5.83263	-0.0799898	6.31233	4.90429	1.86888	1.05655
3809.52	2.97164	3.32148	3.86043	2.75322	5.74507	0.0601021	5.03668	5.04727	1.48533	1.17032
3820.97	3.03601	3.65645	4.06962	2.64636	5.70905	-0.0382024	6.4043	4.95338	1.87096	1.00114
3832.42	3.37114	3.79906	4.56589	2.54917	6.0634	0.025315	7.15185	5.283	1.2865	0.811424
3843.86	3.53206	3.85949	4.48394	2.24304	5.98179	-0.00817493	5.81838	5.33692	0.857863	0.799662
3855.31	3.58407	3.84471	4.81507	2.07448	5.85936	-0.00164024	5.73863	5.15948	1.16242	0.73916
3866.76	3.63625	3.83323	5.23397	2.05016	6.16575	0.0094399	6.46295	5.28344	1.03992	0.950602
3878.21	3.56493	3.6733	5.28871	1.94273	6.04806	-0.0119855	6.76076	5.32254	0.769795	0.997848
3889.65	3.85505	3.71792	5.46482	1.81284	5.92612	0.011386	6.86904	5.28644	0.599478	1.02479
3901.1	3.93664	3.97702	5.49122	1.82737	6.16772	-0.00881581	6.84714	5.25268	0.57778	1.1439
3912.55	3.8338	4.06	5.44028	1.88086	6.13465	0.00542674	6.61249	5.29406	0.553773	0.956176
3923.99	3.89514	4.22877	5.4739	1.75008	5.90793	-0.00230206	6.43406	5.29572	0.617097	1.09548
3935.44	3.67102	4.32014	5.2914	1.70515	5.91939	-2.75974e-06	6.55206	5.25	0.71361	1.18403
3946.89	3.28118	4.43006	5.07558	1.85042	5.95296	0.0021781	6.62975	5.2219	0.571532	0.979384
3958.33	3.11604	4.48268	4.94018	2.07501	5.95338	-0.00465128	6.67521	5.3195	0.621465	1.021
3969.78	3.10922	4.51851	4.82861	2.2115	5.88095	0.00227764	6.56311	5.35742	0.694126	1.10849
3981.23	2.87962	4.60491	4.58325	2.3041	5.70025	-0.00893572	6.15777	5.2075	0.583896	1.28847
3992.67	2.86683	4.62682	4.41442	2.64022	5.78765	0.00144739	5.75363	5.29325	0.71795	1.43501
4004.12	3.09065	4.66085	4.58917	2.87603	5.87665	-0.00895767	5.56406	5.3596	0.832149	1.51518
4015.57	2.63317	4.52412	4.68111	3.04477	5.77945	-0.0130604	5.74805	5.39016	0.779816	1.85181
4027.01	2.22865	4.73529	4.66475	3.16207	5.54685	0.172598	5.91986	5.02976	0.813602	2.00934
4038.46	2.26577	4.92912	4.55153	3.19081	5.83666	0.722322	5.59324	4.83133	0.839724	2.12699
4049.91	1.92481	4.93272	4.53462	3.58359	5.829	1.15489	4.88408	5.41744	0.928208	2.37671
4061.36	1.67728	4.9854	4.81398	3.86146	5.49751	1.36217	4.37053	5.13735	0.928079	2.38187
4072.8	1.91316	4.84385	4.9186	3.85116	5.94247	1.72418	4.10219	5.25206	0.827178	2.48423
4084.25	2.3155	5.17541	5.03148	4.06802	5.07359	1.66084	3.76385	5.54007	0.943648	2.66692
4095.7	2.30865	4.94632	4.89166	4.26549	4.72454	1.58419	3.49866	5.04271	0.981111	2.77081
4107.14	2.16896	4.698	4.34526	4.44786	5.62709	1.77282	3.25278	5.32411	0.884824	3.10011
4118.59	2.4358	5.23989	3.98948	4.7185	5.44381	1.45508	3.43197	5.14558	0.908424	3.23613
4130.04	2.41705	4.66737	3.84851	4.72326	5.53196	1.45763	3.70198	5.26811	0.800832	3.00243
4141.48	2.61165	4.44209	4.07121	4.92489	5.59455	1.79505	3.57587	5.1953	0.52526	2.89971
4152.93	2.85656	4.85963	4.07114	5.36863	5.33134	1.6119	3.77065	5.24721	0.40503	2.82369
4164.38	2.53242	4.74435	3.89959	5.33063	5.38785	1.62657	3.83931	5.69955	0.345787	2.88812
4175.82	2.54036	4.83974	4.06675	5.282	5.70971	1.72283	3.67242	3.95616	0.32359	3.1297
4187.27	2.43668	4.37601	3.73793	5.2769	5.73284	1.55349	3.82971	4.49282	0.442195	3.25069
4198.72	2.28543	4.30057	3.42886	5.37589	5.57824	1.51955	3.90657	4.57977	0.628339	3.51733
4210.16	2.40305	4.49196	3.64032	5.73814	5.73437	1.39768	3.68061	3.53629	0.731769	3.71596
4221.61	2.44874	4.25363	3.67584	5.06682	5.59619	1.39021	3.61691	5.45924	0.709371	3.84066
4233.06	2.58837	4.62676	3.52089	4.23124	5.77703	1.39343	3.75129	5.46117	0.807839	3.69028
4244.51	2.2927	3.78948	3.36242	4.55195	5.88006	1.32249	3.75779	5.09476	0.897012	3.46111
4255.95	2.17341	3.61084	3.39513	5.05689	5.81296	1.48077	3.64955	5.457	0.949308	3.1666
4267.4	2.57613	5.01287	3.39057	5.12299	6.08225	1.28731	3.59744	5.3566	1.03355	2.74657
4278.85	2.6023	4.57533	3.22311	4.85409	5.98332	1.25293	3.72102	5.41201	1.0216	3.75741
4290.29	2.50146	4.39796	3.28822	4.61636	6.06049	1.60754	3.7397	5.42477	1.10163	4.63322
4301.74	2.4603	4.89115	3.31027	4.18395	6.06573	1.78385	3.71187	5.68135	1.15618	4.26157
4313.19	2.46145	4.93917	3.42005	3.73091	5.79165	2.02951	3.90851	5.09455	1.10891	4.33642
4324.63	2.42205	4.76885	3.94631	3.6652	5.91047	2.10195	4.02174	5.27961	1.13738	4.23037
4336.08	2.46496	3.94548	3.90702	3.628	5.84914	2.29354	4.17178	5.78582	1.16761	4.14306
4347.53	2.61149	3.96345	3.62764	3.57108	5.72249	2.31295	4.25679	5.56386	1.25521	4.62843
4358.97	2.38894	4.12524	3.90202	3.24388	5.74732	2.07911	4.07248	5.73878	1.21639	4.46653
4370.42	2.56574	4.12744	4.01826	2.78624	5.74107	2.39177	4.20554	5.84955	1.07327	4.49417
4381.87	2.81663	4.15063	4.13049	2.64102	5.70524	2.23712	4.34003	5.89523	1.11383	4.39793
4393.31	2.59071	3.69734	4.30588	2.65245	5.52544	2.26705	4.3708	5.89497	1.04112	4.27171
4404.76	2.66988	3.72311	3.92493	2.86941	5.53808	2.6448	4.3486	5.9778	1.00116	5.07232
4416.21	2.60689	3.56697	3.83968	3.2164	5.39236	2.11779	4.15044	5.92108	1.06602	5.24758
4427.66	2.51225	3.35412	4.15402	3.19899	5.26377	2.18343	4.59083	5.75129	0.939772	5.21544
4439.1	2.66374	3.66218	4.10818	2.99772	5.30659	2.39998	4.64514	5.62724	0.928573	5.25348
4450.55	2.69113	3.80595	3.95602	2.89897	5.11101	2.44352	4.32847	5.615	1.01683	5.25191
4462	2.69284	3.78376	4.09677	2.62158	5.31377	2.64353	4.65985	5.79714	1.0419	5.49742
4473.44	2.71711	3.78348	4.26828	2.46411	5.24351	2.398	4.42275	5.76135	1.02558	5.52535
4484.89	2.79619	3.68501	4.06695	2.62159	5.05439	2.62809	4.27697	5.80845	0.993052	5.7305
4496.34	2.77488	3.49284	3.95114	2.71083	5.40578	2.49834	4.3165	5.7259	1.00601	5.48608
4507.78	2.87383	3.55612	3.92351	2.8468	5.36212	2.76101	3.83045	5.61011	0.964809	5.09986
4519.23	2.81284	3.31706	3.93003	3.08341	5.4577	3.03307	4.08315	5.5323	0.965887	5.40912
4530.68	2.61708	2.90795	3.81044	3.28646	5.38467	2.05852	3.89841	5.42348	0.909461	5.39991
4542.12	2.51999	2.70956	3.69024	3.51612	5.00179	2.39937	3.55954	5.49537	0.858444	5.35617
4553.57	2.14569	1.76013	3.80253	3.57067	5.11784	2.97805	3.60272	5.40467	0.827657	5.55888
4565.02	2.17748	1.22662	3.80928	3.67583	4.97133	2.76732	2.72024	5.37355	0.672722	5.52517
4576.47	2.1859	1.44597	3.71798	4.03156	4.95332	2.70845	2.9675	5.4096	0.802008	5.57747
4587.91	1.9456	1.23468	3.7634	4.13935	5.08379	2.44981	3.65784	5.27247	0.877677	5.54941
4599.36	2.03165	1.17566	3.97344	4.10997	4.9193	2.39232	3.60065	5.19163	0.698765	5.68388
4610.8	1.97181	1.17013	3.72735	4.19702	4.84743	2.36231	3.86506	5.17599	0.762502	5.84195
4622.25	2.0952	1.08561	3.6218	4.1228	4.68571	2.21548	3.81593	4.95377	0.7447	5.69799
4633.7	2.1057	1.08868	3.86039	3.89229	4.44537	2.05087	3.808	4.97241	0.636202	5.29536
4645.14	2.07521	0.98868	3.66112	3.652	4.4418	1.7893	3.70284	5.01815	0.703024	4.00742
4656.6	2.45163	1.00213	3.54355	3.48693	4.7388	1.35403	3.66656	4.65451	0.649743	4.24616
4668.04	2.60356	1.01326	3.55833	3.37497	4.64246	0.894988	3.75926	4.29976	0.641614	6.03935
4679.49	2.76398	0.885832	3.47997	3.04968	4.6155	0.595637	3.55345	4.13389	0.672002	6.16485
4690.93	2.80935	0.764347	3.47482	2.80629	4.85027	0.237469	3.49202	4.29307	0.57434	6.01719
4702.38	2.70013	0.577589	3.26105	2.57771	4.67826	-0.229494	3.52485	4.3312	0.549691	6.23629
4713.84	2.89832	0.525037	2.91429	2.3055	4.83508	-0.756072	3.77028	4.12424	0.605701	6.20007
4725.26	2.92179	0.48904	2.82038	2.24821	4.87559	-0.941421	3.60956	4.11604	0.63776	6.3919
4736.73	2.66873	0.251977	2.724	2.18294	4.83691	-0.725413	3.58447	4.24127	0.561623	6.21657
4748.16	2.74185	0.281108	2.53722	2.38676	4.90413	-0.463283	3.82827	4.24568	0.604247	5.99759
4759.62	2.79753	0.224457	2.40303	2.46717	4.5262	-0.408619	3.60651	4.50645	0.606411	5.80191
4771.07	2.74797	0.0222577	2.24218	2.30359	4.77524	-0.363885	3.74266	4.51276	0.507657	5.4064
4782.49	2.75713	0.0659954	2.20387	2.3971	5.17642	-0.194988	3.78138	4.23387	0.594467	5.32476
4793.99	2.55865	0.0607325	2.09539	2.54747	4.92646	-0.124768	3.73273	4.45265	0.591651	5.38426
4805.37	2.45104	-0.0115873	1.89527	2.4042	4.91044	0.0401344	3.88505	3.92368	0.572754	5.14529
4816.88	2.27525	-0.0380583	1.80755	2.22522	5.06079	-0.0163612	3.64658	3.84891	0.53308	4.94584
4828.29	1.96478	0.0247468	1.63095	2.32981	4.7809	0.00609853	3.66894	4.77082	0.462251	5.15863
4839.72	1.78135	0.0278138	1.65281	2.26854	4.72842	0.245748	3.52812	4.60113	0.206577	5.12448
4851.25	1.66668	-0.00954949	1.57892	2.16758	5.06441	0.0503293	2.76652	4.60175	-0.0333803	5.00507
4862.55	1.42198	-0.0703734	1.23468	2.0236	4.98097	-0.0355207	2.58728	4.83482	0.30267	5.38394
4874.19	1.12846	-0.228604	1.47875	1.8453	4.84969	0.0277905	2.57775	4.51927	0.554203	5.47773
4885.43	1.16539	-0.21347	1.84371	1.82329	4.98242	-0.0199591	2.20512	5.00438	0.28812	5.20207
4897.04	1.21521	-0.11517	1.88404	1.73308	4.8248	0.0116824	2.17944	4.45379	-0.105797	5.42446
4908.49	1.2265	-0.0522878	1.83212	1.5998	4.88455	-0.00438776	2.1143	2.9786	0.122211	5.3341
4919.75	1.29155	-0.0489104	1.85733	1.47567	5.15566	-0.00243921	2.14784	3.87893	0.461416	5.23722
4931.79	1.10442	-0.0676316	1.97662	1.30367	5.12157	0.00571524	2.22071	5.09525	0.432125	5.30772
4942.33	0.944721	0.0353113	1.61309	0.491654	5.67297	-0.00669021	1.13219	5.54681	0.617354	3.54314
