# Supplementary material for: How spatial release from masking may fail to function in a highly directional auditory system
Source: eLife. 2017 Apr 25;6:e20731. doi: 10.7554/eLife.20731 (PMC5443663; doi:10.7554/eLife.20731)
Supplement: Figure 4—source data 2. — The target signal was presented at 76 dB SPL while the masker intensity was varied to achieve three SNRs (−6, 0, +6 dB). Masker presentation started and ended 0.5 and 4.5 s after the onset of data acquisition, respectively. Signal presentation started and ended 1.0 and 4.0 s after the onset of data acquisition, respectively. Data plotted in Figure 4B (left). DOI: http://dx.doi.org/10.7554/eLife.20731.011 [file elife-20731-fig4-data2.xlsx]

## Sheet: minus6grp
Time	Fly1	Fly2	Fly3	Fly4	Fly5	Fly6	Fly7	Fly8
9.04816	-7.75249e-06	-1.30476e-05	-2.98723e-07	-3.81681e-06	-1.03586e-05	2.2601e-06	-1.99323e-07	-1.0109e-05
20.6654	1.12642e-05	1.74476e-05	7.65409e-06	5.02755e-06	1.86117e-05	1.79241e-06	1.17333e-06	8.8554e-06
32.0169	-1.23621e-05	-1.76742e-05	-1.54468e-05	-5.01177e-06	-2.39011e-05	-6.92155e-06	-2.1502e-06	-4.02567e-06
43.516	9.65834e-06	1.1904e-05	2.11741e-05	3.2621e-06	2.31645e-05	1.18097e-05	2.79444e-06	-4.21086e-06
54.9464	-2.49545e-06	3.81365e-07	-2.19983e-05	3.43393e-07	-1.41364e-05	-1.46715e-05	-2.74494e-06	1.44399e-05
66.3754	-8.52234e-06	-1.76719e-05	1.55855e-05	-5.33802e-06	-3.53856e-06	1.36733e-05	1.72871e-06	-2.39691e-05
77.8637	2.12095e-05	3.61012e-05	-1.11996e-06	1.05812e-05	2.7384e-05	-7.54526e-06	3.08209e-07	2.92216e-05
89.2613	-3.18916e-05	-4.97937e-05	-1.97797e-05	-1.43698e-05	-5.17615e-05	-3.74539e-06	-3.09055e-06	-2.6599e-05
100.751	3.60485e-05	5.20499e-05	4.26007e-05	1.479e-05	6.84922e-05	1.84659e-05	5.97105e-06	1.37128e-05
112.171	-2.95195e-05	-3.73107e-05	-6.02812e-05	-1.02885e-05	-6.86124e-05	-3.29769e-05	-7.99801e-06	9.28734e-06
123.626	1.00868e-05	3.54986e-06	6.45782e-05	3.59055e-07	4.51356e-05	4.21898e-05	8.116e-06	-3.87031e-05
135.079	2.09472e-05	4.55503e-05	-4.84152e-05	1.38459e-05	3.71324e-06	-4.07142e-05	-5.48623e-06	6.7079e-05
146.511	-5.77376e-05	-9.94812e-05	8.80791e-06	-2.92183e-05	-7.17068e-05	2.45898e-05	-1.3388e-07	-8.42011e-05
157.976	9.00117e-05	0.000141676	5.03954e-05	4.09481e-05	0.000143415	6.75133e-06	8.05781e-06	7.94628e-05
169.408	-0.000104758	-0.000152684	-0.000116984	-4.34693e-05	-0.000195677	-4.88706e-05	-1.6518e-05	-4.53564e-05
180.864	8.95635e-05	0.00011567	0.000171095	3.20622e-05	0.000202347	9.17585e-05	2.28229e-05	-1.86441e-05
192.307	-3.71469e-05	-2.3313e-05	-0.000188861	-4.83425e-06	-0.000142067	-0.000120954	-2.38977e-05	0.000102981
203.753	-4.99897e-05	-0.000115696	0.000148964	-3.54439e-05	7.62355e-06	0.000120667	1.71842e-05	-0.00018709
215.204	0.000156329	0.000272948	-4.10444e-05	8.03435e-05	0.000185647	-7.86645e-05	-1.73912e-06	0.000241879
226.645	-0.000253242	-0.000401862	-0.000126139	-0.000116319	-0.000395731	-8.01728e-06	-2.07635e-05	-0.000236196
238.098	0.000303385	0.000446157	0.000319741	0.000127242	0.000557268	0.000128171	4.55137e-05	0.000146714
249.541	-0.000269927	-0.000355208	-0.000484081	-9.8888e-05	-0.00059433	-0.000254357	-6.49145e-05	3.07384e-05
260.989	0.000129478	0.000103868	0.000550303	2.46289e-05	0.000442135	0.00034559	7.00441e-05	-0.000271724
272.436	0.000114252	0.00028825	-0.000454593	8.91254e-05	-7.39695e-05	-0.000355852	-5.31883e-05	0.000519699
283.882	-0.00042045	-0.000744903	0.000162257	-0.000219727	-0.000473756	0.000247871	1.10035e-05	-0.000692181
295.331	0.000709817	0.00113591	0.000308207	0.000329325	0.00108761	-9.57098e-06	5.25379e-05	0.000698425
306.776	-0.00087581	-0.00129942	-0.000869282	-0.000371483	-0.00158373	-0.000331438	-0.000124522	-0.000467155
318.224	0.000809796	0.00108408	0.00136569	0.000303408	0.00174132	0.000701023	0.000183851	-2.11619e-05
329.67	-0.000437228	-0.000405025	-0.00159932	-0.000102007	-0.00136315	-0.000984613	-0.000205014	0.000706598
341.117	-0.000242713	-0.000699461	0.00137921	-0.000219857	0.000354149	0.00104913	0.000164761	-0.00143738
352.564	0.00112559	0.00202858	-0.0005902	0.000602036	0.00120063	-0.000779594	-5.05676e-05	0.0019825
364.011	-0.0019919	-0.00321676	-0.000734322	-0.000936521	-0.00298693	0.00012475	-0.000130627	-0.00207476
375.458	0.0025322	0.00378751	0.00236013	0.0010838	0.00447618	0.000856258	0.00034525	0.00148346
386.905	-0.00241598	-0.00327364	-0.00384781	-0.000910636	-0.00502982	-0.00196018	-0.000530785	-0.00011247
398.352	0.00140355	0.00139688	0.00462174	0.000346029	0.00408942	0.00283979	0.00060495	-0.00189357
409.799	0.000521135	0.00174395	-0.00411336	0.000563294	-0.00139424	-0.00307326	-0.000491011	0.00407343
421.245	-0.00304221	-0.00554853	0.00196884	-0.00162657	-0.00282989	0.00230161	0.000146084	-0.00568477
432.692	0.00548664	0.00887405	0.00167856	0.0025193	0.00772715	-0.000359852	0.000394247	0.00589156
444.139	-0.00698145	-0.0104246	-0.00618314	-0.00289336	-0.0121447	-0.00239681	-0.000963109	-0.00401703
455.586	0.00673878	0.00918266	0.010407	0.00257282	0.0147942	0.00512878	0.00128978	0.000176525
467.033	-0.00445036	-0.00515394	-0.0131758	-0.00162905	-0.0143919	-0.00667975	-0.0012641	0.00456689
478.48	0.000238052	-0.00145932	0.0129152	-2.20411e-05	0.00812812	0.00715584	0.00141726	-0.00840866
489.927	0.00602235	0.0132574	-0.00643131	0.00352425	0.00844352	-0.00897664	-0.00115203	0.0116549
501.374	-0.0129988	-0.020961	0.000384623	-0.00757615	-0.0216527	0.00292731	-0.000136496	-0.018905
512.821	0.0222335	0.0354319	0.0154753	0.0108476	0.0453393	-0.0018028	0.000978512	0.0162428
524.267	-0.0281586	-0.0392588	-0.0303621	-0.0145325	-0.0577704	-0.00857734	-0.000471629	-0.0195716
535.714	0.0300803	0.046626	0.0585957	0.0157971	0.0648945	0.0101847	-0.00255326	0.00518827
547.161	-0.0213226	-0.0915278	-0.113828	-0.0127145	-0.0302992	-0.00612843	-0.0604244	0.0020752
558.608	-0.10654	-0.515259	-0.306685	-0.132652	-0.650152	0.471603	0.00473938	-0.0221983
570.055	0.0129452	-0.506054	-0.538783	0.0365632	-1.00224	0.780713	0.124865	0.814524
581.502	-0.268747	-0.783534	-0.626941	0.179668	-0.741757	0.548981	0.00524731	1.04691
592.949	-0.193176	-0.708555	-0.29251	0.0695326	-0.426375	0.730578	-0.10849	0.648172
604.396	0.213608	-0.304621	-0.568968	0.0260557	-0.680242	0.807981	-0.0506707	1.34742
615.842	0.153142	-0.337662	-0.419429	0.0345853	-0.366463	0.860344	0.0289466	1.28293
627.289	0.244447	-0.0873195	-0.0248762	-0.109215	-0.481071	1.12058	0.0301354	0.674541
638.736	0.34832	0.151028	-0.198354	-0.168095	-0.605381	0.980818	0.12279	1.1643
650.183	0.303469	0.266427	0.113932	0.0557987	0.138825	1.05913	0.229622	1.12705
661.63	0.281553	0.358707	-0.00574968	0.146266	-0.411954	1.17565	0.0412538	0.801262
673.077	0.348996	0.388994	-0.271615	0.0440822	-0.251852	1.06456	0.0768605	1.21529
684.524	0.603665	0.532729	-0.115427	0.00194908	0.563552	1.35259	0.299812	0.858
695.971	0.3255	0.67908	0.118882	0.118235	0.215053	1.37002	0.399711	0.576712
707.418	0.293587	0.806762	0.306318	0.194028	0.541263	1.13597	0.650984	0.938013
718.864	0.700618	1.03	0.452603	0.0611632	0.918154	1.24368	0.714758	0.367225
730.311	0.267481	1.32269	0.606882	-0.0044219	0.860762	1.32511	0.741785	0.38304
741.758	0.303831	1.37196	0.0677607	-0.136549	0.959679	1.19431	0.834407	0.624051
753.205	0.689866	1.46083	0.198675	-0.337327	0.712794	1.08218	0.645481	0.0138815
764.652	0.392062	1.58818	0.827226	-0.15232	1.11143	1.32512	0.597651	0.0242224
776.099	0.462428	1.4892	1.23947	0.123283	1.33527	1.61829	0.706129	-0.102059
787.546	0.606365	1.65083	1.47672	0.100252	1.33258	1.32649	0.646531	-0.172462
798.993	0.675223	1.77392	1.11348	0.0506367	1.25904	1.18511	0.613675	-0.0180568
810.44	0.68683	1.76466	1.143	0.133158	0.0352837	1.36952	0.683307	-0.401429
821.886	0.625786	1.7543	1.27091	0.172403	0.480237	1.0702	0.664561	-0.1802
833.333	0.89301	1.3886	1.19894	0.118652	1.12846	1.18718	0.496638	0.036781
844.78	0.950959	1.32671	1.13748	0.045252	0.66072	1.40893	0.432626	-0.244806
856.227	0.797391	1.54215	0.952102	0.0102755	0.857385	1.3917	0.684006	-0.126766
867.674	0.448716	1.53811	0.569886	0.160886	0.764782	1.29359	0.726673	0.00858054
879.121	0.119557	1.4321	0.767855	0.0525226	0.677873	0.947383	0.527715	0.0945256
890.568	0.345792	1.18499	0.855605	-0.0501032	0.53297	1.2012	0.572958	0.329449
902.015	0.521341	1.31778	0.429031	0.0801921	0.439312	1.53164	0.618632	0.531704
913.462	0.648272	1.3926	0.789609	-0.102392	0.195777	1.79547	0.666515	0.798078
924.908	0.994841	1.11642	0.755903	0.125843	0.195597	1.42146	0.909675	1.16587
936.355	0.649118	1.06774	0.620741	0.260374	0.847491	1.21173	1.21406	1.48411
947.802	0.213968	0.970874	0.665048	0.155859	0.816016	1.70953	1.14098	1.62474
959.249	0.448245	0.950777	0.705728	0.335287	1.05636	1.26394	0.800846	1.48019
970.696	0.520852	0.699205	0.522622	0.33319	1.38961	1.2372	0.624323	1.2595
982.143	0.556054	0.46613	-0.846641	0.488454	1.27191	1.60709	0.46749	1.15486
993.59	0.764797	0.802093	-0.578899	0.278467	1.42601	1.6074	0.310769	1.03212
1005.04	1.06344	0.695557	0.446006	0.0866958	1.39685	1.6242	0.182528	0.832022
1016.48	1.25865	0.465158	0.216924	0.104349	1.6175	1.47767	-0.0303579	0.500942
1027.93	0.798896	0.659883	0.222137	-0.31852	1.75672	1.38258	-0.10243	0.443972
1039.38	0.52201	0.658683	0.346903	-0.165682	1.63928	1.33575	-0.0514833	0.267731
1050.82	0.602242	0.614447	0.850352	-0.0914653	1.85254	1.09039	-0.18256	-0.303216
1062.27	0.511095	0.59241	0.995914	-0.195073	1.75757	0.926499	-0.0541075	-0.442471
1073.72	0.193301	0.451356	0.936251	-0.234704	1.45124	1.25542	0.159537	-0.537612
1085.16	0.0822631	0.410086	1.14887	-0.559357	1.28579	1.23143	0.0473899	-0.506721
1096.61	0.486127	0.41715	1.00856	-0.251859	0.835889	1.0964	-0.104971	-0.317661
1108.06	0.320152	0.368841	1.13485	-0.117187	0.193625	1.37959	-0.27348	-0.367171
1119.51	-0.00763776	0.369312	1.11027	-0.267345	0.0100849	1.37092	-0.0968202	-0.293534
1130.95	-0.108577	0.3297	0.915909	-0.097113	-0.258006	1.27364	-0.0356717	-0.230295
1142.4	-0.305054	0.427784	1.1457	0.0477609	-0.879237	1.55251	-0.00706289	-0.157114
1153.85	-0.042495	0.676649	0.984146	0.200826	-1.01342	1.74882	0.166926	-0.0768337
1165.29	0.03553	0.586959	0.773963	0.413563	-1.17728	1.81888	-0.0264769	0.320853
1176.74	-0.0808756	0.701808	0.98861	0.469036	-1.17619	1.83032	0.233867	0.34995
1188.19	0.0113021	0.76654	-0.370457	0.319292	-0.517508	1.4769	0.362759	-0.119099
1199.63	-0.0657379	0.508521	-1.13444	0.4674	-0.461171	1.65325	0.108223	0.164959
1211.08	0.060213	0.716774	0.284973	0.514565	-0.639924	1.67037	0.257387	0.192252
1222.53	0.116819	0.542261	0.429079	0.418689	-0.372739	1.29695	0.182645	-0.0629707
1233.97	0.0728341	0.433006	0.231481	0.383873	-0.222864	1.5965	0.0724313	0.034108
1245.42	0.284574	0.772933	0.340543	0.350882	0.168262	1.42151	0.0678355	-0.0175596
1256.87	0.128352	0.480298	0.123511	0.433303	0.447036	1.16775	-0.0188068	0.0023813
1268.31	0.0890463	0.417206	0.426038	0.352293	0.216667	0.970909	0.016815	0.00658757
1279.76	0.155485	0.703779	0.574179	0.400381	0.292832	0.53721	-0.0112743	-0.0118936
1291.21	0.0177905	0.69789	0.825529	0.232173	0.87944	0.44116	-0.0930922	0.0125367
1302.66	0.256961	0.551539	1.01705	0.037452	0.880407	0.129019	-0.139514	-0.0113166
1314.1	0.132969	0.48886	0.784585	0.120921	0.987146	-0.21869	-0.0518679	0.00793369
1325.55	0.0519401	0.537764	0.818884	-0.0162859	1.48278	-0.369253	0.0223448	-0.00323039
1337	0.238095	0.523578	0.422066	0.0592226	1.19026	-0.346861	-0.0495393	-0.00124632
1348.44	0.0658091	0.484482	0.424555	0.0214909	1.44199	-0.377797	-0.0962973	0.00428377
1359.89	0.148476	0.467905	0.786433	-0.137289	1.71294	-0.443843	-0.0441512	-0.00535101
1371.34	0.153835	0.305383	0.551714	-0.102728	1.62084	-0.256137	-0.0175684	0.00458214
1382.78	0.0574177	0.185595	1.11104	-0.205032	1.87033	-0.361881	-0.0881771	-0.00255022
1394.23	0.134664	0.230053	1.11965	-0.20515	1.70049	-0.23578	0.0416389	4.41177e-05
1405.68	0.20469	0.0256417	1.02524	-0.245174	2.00334	0.0658779	0.0862598	0.00214125
1417.12	0.231756	0.0748833	1.51521	-0.327993	2.24552	-0.122505	-0.0749861	-0.00334866
1428.57	0.249709	-0.029205	1.1424	-0.283487	2.37566	-0.0754335	-0.0349007	0.00330386
1440.02	0.283628	-0.114617	1.06435	-0.211269	1.93619	0.0649291	-0.0154673	-0.00214087
1451.47	0.117422	0.448002	0.604154	-0.206755	-0.0904665	0.109557	0.0833076	0.000435354
1462.91	0.207409	0.452264	0.249442	-0.353663	0.234737	0.120899	0.137224	0.00175261
1474.36	0.254891	0.32555	0.568399	-0.114481	2.44709	-0.103046	0.0741721	-0.00554782
1485.81	0.132883	0.433417	0.193826	-0.0396483	2.19008	-0.124787	0.148249	0.00561937
1497.25	0.267869	0.263392	0.037957	-0.278414	1.74504	-0.124998	0.066652	-0.0113596
1508.7	0.285496	0.387857	-0.164084	0.00466175	2.47018	-0.0405946	0.122733	0.00994817
1520.15	0.276328	0.507479	-0.579455	-0.0191533	1.01973	0.029144	0.241944	-0.0131032
1531.59	0.322628	0.561395	-0.49824	-0.184272	0.25966	-0.0570655	0.213276	0.00613854
1543.04	0.348057	0.752834	-0.143066	-0.136493	1.51611	0.0941262	0.323935	0.288761
1554.49	0.399918	0.66303	-0.0457842	-0.173208	1.90568	-0.042025	0.310924	0.459948
1565.93	0.419616	0.756216	-0.211636	-0.0347732	1.50818	0.147071	0.286491	0.587159
1577.38	0.401517	0.827502	-0.0334392	-0.011895	-0.111353	0.180955	0.373696	0.651682
1588.83	0.462527	0.753147	0.0477491	-0.0370384	-0.00161893	-0.0977791	0.327153	0.381287
1600.27	0.581049	0.946111	-0.0372826	-0.0214748	0.985395	0.402387	0.346498	0.385793
1611.72	0.604839	0.980024	-0.00719149	-0.0538101	0.974141	0.357396	0.382465	0.466049
1623.17	0.589801	0.912947	0.239229	-0.0640765	0.838396	0.273295	0.345567	0.321175
1634.62	0.697917	0.999803	0.469813	0.147405	-0.334285	0.541013	0.2994	0.289392
1646.06	0.777851	1.08737	0.699869	0.253862	-0.0506271	0.827058	0.268008	0.21838
1657.51	0.60018	1.03749	0.961764	0.189594	1.19784	1.3245	0.28454	0.265132
1668.96	0.662749	1.08024	0.750699	0.40227	1.43898	1.10943	0.168431	0.207185
1680.4	0.457671	1.23577	0.849975	0.430829	1.63429	1.14128	0.158378	0.218544
1691.85	0.172735	1.21094	1.25637	0.479875	2.12084	1.45253	0.177706	0.366612
1703.3	0.62883	1.30391	1.38816	0.504091	2.53069	1.36702	0.091557	0.195877
1714.74	0.720176	1.50254	1.55088	0.450997	2.40071	1.48951	0.0611408	0.0100059
1726.19	0.54078	1.38074	1.21954	0.677101	2.343	1.65425	-0.0254504	-0.00853603
1737.64	0.565366	1.20109	0.997698	0.414627	2.47797	1.89524	-0.0368172	0.0114221
1749.08	0.655167	1.29357	1.33419	0.265472	2.45182	2.0944	-0.0569583	-0.0265125
1760.53	0.674908	1.25968	1.29743	0.451295	2.35847	2.17668	0.0963674	0.0484844
1771.98	0.4532	1.13388	1.52159	0.143965	2.52094	2.21468	0.256181	-0.13174
1783.42	0.412012	0.842736	1.5906	0.106248	2.83612	2.26566	0.173432	-0.205292
1794.87	0.516429	0.374533	1.24081	0.244485	2.87926	2.4535	0.166807	0.0534486
1806.32	0.615739	0.380838	1.52063	0.132529	2.9227	2.38302	0.0785604	-0.0546853
1817.77	0.455947	0.434173	1.20267	0.132434	3.0211	2.262	0.144002	0.183052
1829.21	0.32177	0.202721	0.685585	0.0400171	3.08342	2.28766	0.183213	0.412442
1840.66	0.361688	-0.0122467	0.954891	0.201874	3.1121	2.29035	0.0642538	0.41853
1852.11	0.181191	0.0696517	0.95064	0.309046	3.04339	2.44964	0.271854	0.655231
1863.55	0.238947	-0.0481306	0.965676	-0.0415911	3.37893	2.74852	0.325756	0.35488
1875	0.324649	-0.299936	0.869101	0.0357228	3.45867	2.87619	0.231052	0.0899517
1886.45	0.286797	-0.291599	0.425093	0.299516	3.27127	2.67101	0.241385	0.23561
1897.89	0.337112	-0.700675	0.237271	0.248321	3.82988	2.53406	0.356132	0.276476
1909.34	0.36241	-0.681855	0.0487714	0.322435	3.46731	2.56869	0.42066	0.323132
1920.79	0.46491	-0.413292	-0.117441	0.52518	3.12075	2.60163	0.333406	0.297737
1932.23	0.454171	-0.692677	-0.295201	0.461163	3.66776	2.63496	0.518393	0.154043
1943.68	0.54819	-0.738635	-0.334051	0.376237	3.35597	2.78534	0.465677	0.202764
1955.13	0.628452	-0.721621	-0.150274	0.51591	3.41456	3.09517	0.347331	0.23588
1966.58	0.462777	-0.741486	-0.188455	0.580176	3.47733	3.01171	0.522453	0.168636
1978.02	0.418865	-0.665973	-0.0306611	0.458661	3.29475	3.20176	0.618367	0.33038
1989.47	0.379009	-0.550455	0.0253249	0.304656	3.37725	3.31211	0.573938	0.305537
2000.92	0.441368	-0.622709	0.00907357	0.377062	3.0169	3.25028	0.579941	0.321717
2012.36	0.548734	-0.610895	0.25169	0.50624	2.88188	3.83272	0.575299	0.338872
2023.81	0.445327	-0.437607	0.14793	0.358216	2.73706	2.96946	0.547834	0.151472
2035.26	0.482437	-0.64192	0.13433	0.306918	2.41835	2.65986	0.761083	0.170997
2046.7	0.489267	-0.543581	0.176017	0.276647	2.21722	3.67259	0.0917891	-0.0158809
2058.15	0.327654	-0.621292	0.0815403	0.088469	1.6918	3.18211	-0.0524336	-0.0229335
2069.6	0.319571	-0.508457	0.0529689	0.192189	1.2153	2.71479	0.768019	0.0555268
2081.04	0.293999	-0.422628	-0.120485	0.190351	0.927906	2.44787	0.481156	-0.218476
2092.49	0.188154	-1.01957	0.23209	0.065124	0.621788	1.61119	0.472631	-0.115009
2103.94	0.197506	-0.37659	0.23495	0.314535	0.2179	0.751528	0.735516	0.0397626
2115.38	0.237925	-0.161609	0.0492355	0.342203	-0.320784	0.353702	0.763993	-0.0209541
2126.83	0.151253	-0.399041	0.512329	0.140703	-0.103194	0.0293937	0.74469	0.0112014
2138.28	0.200042	0.0386993	0.39276	0.100813	-0.114722	0.0731079	0.66387	-0.00459429
2149.73	0.211824	-0.209936	0.461687	0.162194	-0.380385	0.66513	0.906388	0.000147517
2161.17	0.0472962	-0.199907	0.529551	0.426864	-0.0148623	0.732367	0.663184	0.00369002
2172.62	0.185551	-0.11088	0.371194	0.548795	0.00349735	0.797845	0.512497	-0.00478649
2184.07	0.259696	-0.137753	0.693651	0.572901	0.301095	0.802951	0.604556	0.00537605
2195.51	0.135053	0.0894938	0.481483	0.656008	0.618964	0.879973	0.495535	-0.00488229
2206.96	0.168171	0.053859	0.519869	0.629724	0.472522	1.14209	0.530646	0.00320257
2218.41	0.285926	0.123837	0.639574	0.622358	0.607532	1.20888	0.47475	-0.000945123
2229.85	0.273473	0.136782	-0.0684915	0.382383	0.65484	1.37503	0.436079	-0.00114657
2241.3	0.286477	-0.0679272	0.211347	0.279492	0.719394	1.63299	0.416106	0.00253522
2252.75	0.412646	-0.29523	0.377574	0.177722	1.03269	2.04812	0.537366	-0.00299334
2264.19	0.31076	-0.385283	-0.360172	-0.242295	1.14018	1.85675	0.578069	0.00253495
2275.64	0.29592	-0.307355	-0.281717	-0.239805	1.03884	1.71103	0.510675	-0.00135991
2287.09	0.28758	-0.397137	-0.275271	-0.301235	1.15129	2.00081	0.628264	-0.000209332
2298.53	0.169382	-0.413245	-0.148818	-0.374079	1.3427	1.87571	0.356185	0.00177706
2309.98	0.228066	-0.512985	0.0825317	-0.362852	1.44	2.22324	0.420319	-0.00288391
2321.43	0.228275	-0.862854	-0.349349	-0.564614	1.59558	2.17437	0.810355	0.00321124
2332.88	0.211862	-0.625598	-0.499856	-0.333937	1.65172	1.87227	0.790706	-0.00266152
2344.32	0.229485	-0.358323	-0.511222	-0.26073	1.72569	2.37736	0.752076	0.00161165
2355.77	0.22064	-0.385275	-0.464498	-0.365366	1.88902	2.28109	0.716487	8.9491e-06
2367.22	0.107204	-0.28091	-0.300705	-0.407045	2.11721	2.25773	0.778944	-0.00419505
2378.66	0.00206245	-0.385343	-0.0580876	-0.4949	2.21486	2.30595	0.810177	0.00451025
2390.11	-0.0302291	-0.158061	0.394734	-0.368174	2.24771	2.16891	0.804087	-0.0112959
2401.56	-0.08118	-0.0866314	0.186679	-0.335272	2.19443	2.13391	0.796764	0.0116326
2413	-0.010068	-0.271617	-0.0630325	-0.247385	2.02738	1.6897	0.781123	-0.0231588
2424.45	-0.0121123	0.0382694	0.154645	-0.271702	1.8675	2.01562	0.776392	0.0488482
2435.9	-0.17677	0.102138	-0.00762724	-0.114338	1.3657	2.4128	0.811481	0.348424
2447.34	-0.226736	0.116195	0.204053	0.0306309	1.12396	2.11198	0.919357	0.504686
2458.79	-0.141372	0.0728893	0.667902	-0.170557	0.93485	2.03045	0.888324	0.629915
2470.24	-0.206756	0.232345	0.847151	0.148414	0.440174	2.39967	0.782677	0.701043
2481.68	-0.172784	0.459586	0.810939	0.11463	0.346327	2.47989	0.742512	0.643611
2493.13	0.0901771	0.240525	0.261223	-0.156936	0.480989	2.29499	0.739256	0.651463
2504.58	0.103603	0.655336	0.381869	0.117978	0.883498	2.26276	0.568954	0.551987
2516.03	0.000831991	0.420626	0.733585	0.216963	0.698361	1.87196	0.855188	0.54049
2527.47	0.149851	-0.0465719	0.723326	0.23792	0.245067	1.91505	0.728596	0.519271
2538.92	0.256055	0.354666	0.705002	0.303711	0.446131	2.25851	0.0548633	0.200149
2550.37	0.166599	0.151169	0.585729	0.336121	0.169679	2.04786	0.505358	0.0023183
2561.81	0.20097	0.165775	0.599923	0.386714	0.389685	1.87803	0.45436	-0.0202798
2573.26	0.182277	0.226304	0.274356	0.303694	0.949476	1.74997	0.321715	-0.0521929
2584.71	0.208887	0.215903	0.244997	0.321975	0.936488	1.52986	0.738166	-0.345207
2596.15	0.315531	0.593159	0.136399	0.127394	1.58367	1.79215	0.379807	-0.353271
2607.6	0.153746	0.432776	-0.328361	-0.0749597	1.85556	1.50066	0.172629	-0.0242105
2619.05	0.307799	0.385016	-0.124115	0.310391	1.67116	1.10034	0.0365875	-0.390925
2630.49	0.369546	0.489957	-0.218718	0.228662	1.94725	1.48591	-0.182033	-0.166007
2641.94	0.148415	0.187601	-0.366724	0.123538	1.82414	1.24832	-0.236844	0.333776
2653.39	0.350169	-0.124913	-0.440226	0.525205	1.99349	1.16119	-0.134094	0.117476
2664.84	0.317577	-0.0400324	-0.88966	0.420659	2.37782	1.13377	-0.0390678	0.240864
2676.28	0.246068	0.195452	-0.505887	0.375416	2.37476	0.805977	-0.163942	0.287361
2687.73	0.293641	0.164353	-0.161226	0.521094	2.67363	1.16378	-0.0713748	0.247907
2699.18	0.269936	0.225201	-0.472906	0.557544	2.55293	1.28781	-0.0823228	0.340366
2710.62	0.366775	0.159906	-0.387486	0.498282	2.3722	1.05611	-0.0557811	0.280438
2722.07	0.221475	0.123311	-0.4683	0.290403	2.69534	1.31056	0.00519939	0.270882
2733.52	0.193842	0.263568	-0.0924484	0.255237	2.52854	1.68005	0.0375776	0.285745
2744.96	0.287103	0.109422	0.305501	-0.00180156	2.17626	1.68093	0.223268	0.1788
2756.41	0.277902	0.0397426	-0.391865	0.214383	1.83891	1.46212	0.124313	0.0921197
2767.86	0.292296	0.109939	-0.216138	0.590701	1.40143	1.33033	0.242332	0.165238
2779.3	0.0189697	0.00167704	0.00930499	0.303411	0.99512	1.59883	0.423675	0.0954776
2790.75	-0.283363	-0.345203	-0.418273	0.437008	0.572424	1.79058	0.449281	0.146688
2802.2	-0.248693	-0.628535	-0.31221	0.328173	0.214696	1.72398	0.582384	0.329107
2813.64	0.0351969	-0.570198	-0.00742814	-0.0436351	-0.0453861	1.82942	0.604589	0.379789
2825.09	0.135044	-0.609621	0.00917884	0.098114	0.0314495	1.56401	0.759026	0.439105
2836.54	-0.114068	-0.765496	-0.184576	0.19236	-0.211144	1.35856	0.880752	0.516251
2847.99	-0.0246615	-0.887869	-0.116312	0.236761	-0.498863	1.45709	0.938655	0.580494
2859.43	0.133193	-1.02751	-0.16787	0.220035	-0.305956	1.26735	1.04869	0.546991
2870.88	0.0140373	-1.0491	-0.100879	0.319755	-0.389629	1.07532	1.10047	0.619508
2882.33	0.173966	-0.918913	-0.116265	0.208303	-0.362531	1.28148	1.2821	0.744675
2893.77	0.123729	-0.751709	-0.41579	0.0217847	-0.19097	1.41239	1.35982	0.6415
2905.22	-0.178912	-0.702066	-0.370329	0.240654	-0.0588847	1.2959	1.32582	0.504876
2916.67	-0.211665	-0.676	-0.342716	-0.0636648	0.0804496	1.45477	1.37178	0.446831
2928.11	-0.0891784	-0.695129	-0.340223	-0.0467844	-0.131675	0.886325	1.34393	0.220068
2939.56	0.000312842	-0.55749	-0.379757	0.0507232	-0.197021	0.527602	1.28768	-0.0333186
2951.01	-0.132148	-0.37273	-0.354939	-0.15639	-0.115519	0.7302	1.30058	-0.0154005
2962.45	-0.1038	-0.401591	-0.379495	0.214601	-0.0591164	0.674502	1.37924	0.048181
2973.9	-0.0314739	-0.378708	-0.409014	0.0951297	-0.124664	0.834311	1.37091	-0.12768
2985.35	-0.0751363	-0.687196	-0.206285	0.346745	-0.160563	0.672101	1.34934	-0.256746
2996.79	0.0330329	-0.746957	-0.407806	0.495713	0.340082	0.753032	1.4637	-0.248418
3008.24	0.100718	-0.353003	-0.575822	0.090596	0.401837	0.304028	1.45146	-0.188627
3019.69	0.0352443	-0.473838	-0.72807	0.230582	0.0963379	0.142949	1.37525	-0.0323499
3031.14	-0.014847	-0.545081	-0.724656	0.292115	0.395705	0.527913	1.33926	0.0224839
3042.58	0.129035	-0.402102	-0.372656	0.234551	0.631181	0.578133	1.28583	-0.000804092
3054.03	0.0791428	-0.389878	-0.71208	-0.0845459	0.668598	0.955534	1.23321	-0.0353395
3065.48	0.0387881	-0.411478	-0.916928	-0.11288	0.78605	0.244929	1.09386	0.168001
3076.92	0.157014	-0.519206	-0.634939	-0.107479	0.943578	0.397592	1.0896	0.166104
3088.37	-0.103338	-0.426844	-0.361076	-0.419897	1.30023	0.942901	0.920022	-0.0544733
3099.82	-0.211213	-0.257395	-0.402423	-0.205861	1.3172	0.561428	0.543278	0.0338003
3111.26	-0.10679	-0.471766	-0.683866	0.0870432	1.49251	0.841252	0.551643	-0.0296362
3122.71	-0.0925749	-0.706877	-0.21952	0.183027	1.69236	0.561574	0.575384	0.0273897
3134.16	-0.180523	-0.526334	0.0823579	0.067508	1.71549	0.918324	0.48954	-0.0214079
3145.6	-0.386916	-0.548405	-0.0289172	0.153822	1.83752	0.861815	0.442468	-0.22696
3157.05	-0.331044	-0.641881	-0.0382533	0.369037	1.73895	0.288759	0.472166	-0.052467
3168.5	-0.284158	-0.580034	-0.319418	0.298976	2.05341	1.09912	0.529098	0.0122971
3179.94	-0.329599	-0.780129	-0.204123	0.306326	1.91206	0.961208	0.424374	0.113465
3191.39	-0.231684	-0.738236	-0.1482	0.207026	1.58329	0.959969	0.436549	0.25492
3202.84	-0.150917	-0.841526	-0.165104	0.136591	1.72902	0.968194	0.538077	0.258262
3214.29	-0.123254	-0.714028	0.0761966	0.0071662	1.86301	0.296218	0.567282	0.225445
3225.73	-0.243173	-0.0780351	-0.055867	-0.0540077	1.92827	1.24677	0.555837	0.286394
3237.18	-0.284581	-0.271588	0.0515783	0.119893	1.47583	1.39065	0.637622	0.193841
3248.63	-0.369288	-0.414761	-0.0470361	0.108893	1.41336	0.525998	0.671067	0.0217003
3260.07	-0.468306	-0.243375	-0.223002	0.0278531	0.946486	1.1232	0.748236	0.224739
3271.52	-0.254993	-0.338095	-0.0228756	0.14258	0.501302	1.38377	0.920457	0.0449171
3282.97	-0.338306	-0.13319	-0.154226	0.136464	0.937427	0.962631	0.89841	-0.0527882
3294.41	-0.400815	-0.0434558	-0.188496	-0.215637	0.342983	0.910446	1.07347	0.0576737
3305.86	-0.290185	0.12426	-0.181196	-0.314498	0.195702	1.00796	1.08034	-0.0822064
3317.31	-0.395676	0.259709	-0.00811106	-0.459568	0.186626	0.978121	0.985803	0.216909
3328.75	-0.303473	-0.0363124	-0.00592574	-0.52897	-0.455809	1.00469	1.25591	0.316581
3340.2	-0.336401	-0.0769257	-0.268	-0.225071	-0.185146	1.09702	1.257	0.344238
3351.65	-0.364048	-0.317113	0.0112265	-0.180611	-0.547568	0.915244	1.28077	0.412081
3363.1	-0.25664	-0.503638	0.0135389	-0.0947538	-0.844572	0.953937	1.49822	0.0931657
3374.54	-0.340097	-0.290071	-0.033453	-0.0494793	-0.114535	1.00566	1.49838	0.159663
3385.99	-0.232348	-0.56047	0.0664853	0.0852879	-0.0538153	0.910965	1.40179	0.148227
3397.44	-0.249885	-0.842699	-0.192964	0.470745	-0.277228	1.35848	1.36914	-0.0628851
3408.88	-0.272387	-0.847017	-0.137538	0.165488	-0.338498	1.39382	1.40775	0.0144077
3420.33	-0.0263442	-0.816855	0.0229675	0.161374	-0.605722	1.09965	1.24744	0.0333156
3431.78	0.0516425	-0.606014	0.0079461	0.383806	-0.623478	1.24077	1.14711	-0.140972
3443.22	0.137709	-0.466404	-0.0232842	0.172231	-0.0602323	1.35901	1.13069	-0.153994
3454.67	0.150061	-0.489912	0.0317579	0.51202	-0.0475112	1.46293	0.946411	-0.111611
3466.12	0.129699	-0.443826	-0.0336107	0.299572	-0.197745	1.2682	0.869482	-0.197039
3477.56	0.225765	-0.343925	-0.234183	0.43813	0.0623681	1.22653	0.7059	0.0558655
3489.01	0.173011	-0.328691	-0.0285038	0.956025	-0.29568	1.39623	0.721608	0.234206
3500.46	0.178302	-0.387593	0.0301951	0.439913	-0.53979	1.39511	1.00534	0.0299311
3511.9	0.227409	-0.51372	-0.0460864	0.233815	-0.538468	1.5117	0.84625	-0.0343765
3523.35	0.289729	-0.440444	-0.0690499	0.123919	-0.32981	1.31589	0.787288	0.0418897
3534.8	0.29372	-0.182661	-0.0460922	0.164678	-0.114789	1.03326	1.00152	-0.0446378
3546.25	0.120293	-0.249147	0.0533644	0.0635665	-0.397087	1.12765	0.871515	-0.0635937
3557.69	0.108192	-0.207361	-0.13315	-0.15744	-0.289825	1.16236	0.907172	0.0816266
3569.14	0.23062	0.0225641	-0.0555113	0.132648	-0.35923	0.905545	0.886598	0.015103
3580.59	0.343167	0.107207	0.0121124	-0.100594	-0.618439	1.06436	0.609934	-0.0221518
3592.03	0.339359	0.0833984	0.0241871	-0.384635	-0.760496	1.13211	0.647768	0.0192468
3603.48	0.463406	-0.0253185	-0.0725435	-0.309086	-1.04366	0.915558	0.657377	-0.0132343
3614.93	0.572181	0.0366189	-0.233418	-0.238919	-0.803429	1.051	0.631585	0.00699368
3626.37	0.569203	-0.173437	0.0326945	-0.224565	-0.581726	0.89322	0.561584	-0.00156513
3637.82	0.633753	-0.31555	-0.0244908	-0.329954	-0.882133	0.830436	0.498131	-0.00214841
3649.27	0.451067	-0.290425	0.0369796	-0.231626	-1.06301	0.537752	0.538659	0.00380848
3660.71	0.570122	-0.483205	-0.0508782	-0.100944	-0.787763	0.166388	0.397417	-0.00427702
3672.16	0.719839	-0.386423	-0.200344	-0.167304	-0.704787	0.211289	0.418236	0.00379821
3683.61	0.53843	-0.279613	-0.143851	-0.251503	-0.782601	-0.262128	0.428344	-0.00259743
3695.05	0.567444	-0.329176	-0.487089	-0.114043	-0.708683	-0.347956	0.268293	0.00108754
3706.5	0.488145	-0.287684	-0.229663	0.0488823	-0.613465	-0.28322	0.326886	0.000276647
3717.95	0.388297	-0.36326	-0.179733	0.0560032	-0.329404	-0.719483	0.358523	-0.00117479
3729.4	0.383075	-0.549876	-0.0872048	-0.116504	-0.55889	-0.710004	0.273054	0.00149637
3740.84	0.0994585	-0.470517	0.4882	-0.227673	-0.784073	-0.664613	0.345853	-0.00131694
3752.29	0.0919636	-0.41813	0.575151	0.0467996	-0.71841	-0.741101	0.40257	0.000830321
3763.74	0.246974	-0.447981	0.895781	-0.126766	-0.70507	-0.590941	0.428227	-0.000264562
3775.18	0.00128392	-0.149047	1.00882	-0.0421393	-0.448107	-0.420722	0.546862	-0.000188231
3786.63	0.0104384	0.00387843	0.934084	0.340185	-0.784524	-0.510956	0.55939	0.000413582
3798.08	0.13916	-0.166709	0.900689	-0.191688	-1.0421	-0.422764	0.485223	-0.000387906
3809.52	0.170163	-0.387991	0.707573	-0.213717	-0.781396	-0.025591	0.388041	0.000169216
3820.97	0.178118	-0.651586	0.672784	0.0634748	-0.916477	-0.0168438	0.295887	0.000127977
3832.42	0.00263415	-0.814216	0.559771	-0.118881	-1.03382	-0.128741	0.336103	-0.000367299
3843.86	0.0221165	-0.851933	0.380375	-0.00166369	-0.879606	0.0184925	0.498602	0.000428589
3855.31	0.013349	-0.953786	0.31742	-0.102059	-0.880438	0.388551	0.488867	-0.000243289
3866.76	-0.0399224	-0.912773	0.435098	-0.359749	-0.958824	0.237601	0.378577	-0.00017914
3878.21	0.0771272	-0.680071	0.111205	-0.195669	-0.587854	0.144372	0.51103	0.00074001
3889.65	-0.0877003	-0.849885	0.0381029	-0.26003	-0.0796052	0.591876	0.556891	-0.00126089
3901.1	-0.0692699	-0.897351	0.233858	-0.519596	-0.101487	0.366433	0.514425	0.0015175
3912.55	0.136266	-0.550234	-0.00793885	-0.51386	-0.227589	0.242501	0.533824	-0.00129909
3923.99	0.0661591	-0.640093	0.0151417	-0.27173	0.0856854	0.460252	0.397161	0.000488075
3935.44	0.0463028	-0.761379	-0.309101	-0.279717	0.228709	0.286534	0.321822	0.000858064
3946.89	0.06136	-0.620551	-0.439027	-0.531185	-0.0186317	0.202305	0.399593	-0.00245851
3958.33	0.10603	-0.629013	-0.284864	-0.401069	0.120476	0.118507	0.376028	0.00383041
3969.78	0.0327507	-0.597271	-0.429295	-0.360436	0.270208	0.118989	0.267776	-0.00438599
3981.23	0.0372971	-0.293947	-0.349482	-0.373383	0.166741	0.209987	0.348483	0.00368057
3992.67	0.0376099	-0.0313566	-0.4054	-0.363095	0.296551	-0.0510873	0.387976	-0.00165057
4004.12	0.0109963	-0.0489344	-0.194722	-0.344606	0.102464	0.0441649	0.262969	-0.00136384
4015.57	0.287501	0.0716278	-0.145284	-0.318508	-0.0102512	0.197013	0.11725	0.00524126
4027.01	0.175966	-0.130551	-0.35568	-0.420802	-0.0290765	0.0961431	0.0294851	-0.01063
4038.46	0.0842727	-0.260674	-0.0375309	-0.322187	-0.486734	0.237904	0.106096	0.0140836
4049.91	0.320564	0.448816	0.00964177	-0.368787	-0.353939	0.213112	0.0737647	-0.0160962
4061.36	0.252356	0.012878	-0.0106115	-0.276804	-0.451046	0.173182	0.0153875	0.0142035
4072.8	0.234264	-0.474599	0.0209887	-0.209649	-0.422314	0.223522	-0.0414888	-0.0056389
4084.25	0.28026	0.309685	-0.0367721	-0.476608	-0.43355	0.205464	-0.168408	-0.0199892
4095.7	0.208264	0.226149	0.229973	-0.285967	-1.34055	0.177948	-0.0766458	0.208102
4107.14	0.156577	-0.357574	0.250996	0.115133	-0.945472	0.164272	0.029022	0.10908
4118.59	0.217767	-0.318339	0.256574	0.103225	-0.946444	0.19802	-0.00531986	-0.0478404
4130.04	0.250942	-0.0548333	0.195862	0.185653	-1.33487	0.181232	0.0120753	0.0250461
4141.48	0.164698	-0.249101	-0.0862939	0.382663	-1.18986	0.169763	-0.0130095	-0.0112769
4152.93	0.324031	-0.168298	-0.0219821	0.311414	-1.20284	0.146493	0.130975	0.00223691
4164.38	0.433156	0.235368	-0.00814293	0.387426	-0.345746	0.147358	0.122339	0.00282517
4175.82	0.313333	0.195437	0.0224561	0.377497	-0.515645	0.148168	0.0562974	-0.005819
4187.27	0.354856	0.179231	-0.0271314	0.41884	-0.880359	0.13523	0.290873	0.00536425
4198.72	0.266018	0.232056	0.0120128	0.441972	-0.844724	0.130319	0.0354525	-0.00459607
4210.16	0.0523239	0.213304	0.0390696	0.257092	-1.01445	0.0681478	0.174791	0.00386836
4221.61	0.199013	-0.211132	-0.40682	0.310919	-0.735106	0.104666	0.667648	-0.00333829
4233.06	0.292247	-0.435073	-0.223619	0.0059475	-0.575241	0.0465629	0.481553	0.0032117
4244.51	0.338941	-0.118387	0.0805025	0.0791276	0.00306618	-0.0249182	0.388223	-0.00339975
4255.95	0.401332	-0.0332666	-0.0162853	0.598459	-0.028389	0.0190388	0.413088	0.00356078
4267.4	0.247422	-0.238953	-0.0273316	0.340131	-0.123176	-0.0191442	0.42404	-0.00342541
4278.85	0.306227	-0.484113	0.0656738	0.206121	0.174756	0.0187434	0.375534	0.0024622
4290.29	0.296757	-0.469468	0.0747324	0.142157	0.0146608	-0.0169309	0.304714	0.00195796
4301.74	0.361531	-0.477672	-0.0944632	0.106833	0.307636	0.00942545	0.252422	-0.00780782
4313.19	0.305473	-0.426411	-0.152891	0.147816	0.260047	0.00523178	0.100542	0.0163961
4324.63	0.143739	-0.408067	-0.449368	-0.383749	0.285938	-0.0357217	0.10862	-0.0271331
4336.08	0.373782	-0.732972	-0.338139	-0.309482	0.297573	0.123551	0.0158099	0.0410489
4347.53	0.0724361	-0.734168	-0.255446	-0.107295	-0.0386533	-0.121973	-0.00705752	-0.0663877
4358.97	0.15087	-0.817077	-0.465445	-0.441306	0.0983825	-0.0965363	-0.00388869	-0.225227
4370.42	0.464892	-0.99097	0.0712948	-0.402998	-0.183766	0.151904	-0.179677	-0.00925266
4381.87	0.0680199	-0.798972	-0.0554168	-0.0637469	-0.328211	-0.0355093	-0.0634457	0.0216235
4393.31	0.0592785	-0.793872	-0.495613	-0.0387092	-0.260456	0.002437	-0.00554708	-0.0223943
4404.76	0.215592	-0.728944	-0.00447192	-0.42322	-0.0635554	0.0139174	-0.0660534	0.0190587
4416.21	0.271375	-0.535223	0.317944	-0.402461	0.0724893	-0.0211844	0.0616834	-0.0136934
4427.66	0.29681	-0.51	0.21142	-0.235172	-0.124046	0.0220671	0.0442912	0.00833452
4439.1	0.258636	-0.481902	0.00186099	-0.300516	0.116158	-0.0179751	0.0902353	-0.00237215
4450.55	0.225496	-0.456077	0.0307313	-0.178999	0.162113	0.0114739	0.316179	-0.00112151
4462	0.0943647	-0.324039	0.319194	-0.0431207	0.470014	-0.00447464	0.205459	0.00349113
4473.44	0.0613528	-0.198356	0.353239	0.230933	0.437402	-0.00247534	0.09789	-0.00483792
4484.89	0.0694441	-0.290495	0.21397	0.269666	0.176949	0.00808536	0.217161	0.00503532
4496.34	0.0810762	-0.219834	0.221818	-0.0163928	0.623031	-0.0111207	0.191396	-0.00431243
4507.78	0.0961575	-0.0489593	0.291308	0.121088	0.288061	0.0110636	0.180704	0.0030941
4519.23	0.100599	-0.120218	0.130156	0.340803	0.175472	-0.00825349	0.1799	-0.00173605
4530.68	0.12889	-0.160328	0.0961398	0.302632	0.34801	0.0036718	0.169073	0.000370977
4542.12	0.133045	-0.167938	0.201403	0.287979	0.196327	0.00198034	0.114694	0.00102573
4553.57	0.197809	-0.138165	0.0124286	0.532207	0.529755	-0.00950127	0.0521769	-0.00249532
4565.02	0.18879	0.0983529	-0.0228601	0.603481	0.545255	0.0156018	0.138863	0.00394288
4576.47	0.163922	0.183037	0.0186513	0.422181	0.396923	-0.0209635	0.117564	-0.00503683
4587.91	0.220171	0.11661	-0.0143165	0.429084	0.447631	0.0238063	0.0970763	0.00532795
4599.36	0.24911	0.0666942	0.00771561	0.350128	0.475928	-0.0223731	0.124557	-0.00451452
4610.8	0.246014	-0.0332163	-0.00457433	0.458084	0.368155	0.00944818	0.0797828	0.00265472
4622.25	0.234	0.031099	0.00475395	0.439021	0.249298	0.225313	0.0852327	0.00040334
4633.7	0.218267	0.138132	-0.00802428	0.0128958	0.229255	0.0663169	0.0721712	-0.00633133
4645.14	0.1115	0.0260071	0.0138249	-0.00839439	-0.0110648	-0.0411811	0.0623689	0.0123055
4656.6	0.177237	-0.10226	-0.0202177	-1.50383e-05	-0.0632638	0.0274684	0.00760584	-0.0191051
4668.04	0.155775	-0.128298	0.0257875	-0.0869272	-0.028682	-0.0167335	-0.0088247	0.0251131
4679.49	0.0149052	-0.0118272	-0.0259881	-0.0915913	-0.0520375	0.00780881	0.0983052	-0.0290669
4690.93	0.154157	-0.0485695	-0.22727	-0.216217	-0.0377455	-0.00127557	0.0228908	0.0269821
4702.38	0.113049	-0.215036	-0.0490504	-0.182714	-0.180014	-0.00401803	-0.0331636	0.228465
4713.84	0.0474781	-0.0653334	0.038927	-0.145352	-0.156086	0.00573362	0.0206999	0.0464671
4725.26	0.0587954	-0.0791029	-0.0289628	-0.15224	-0.100869	-0.00611048	-0.0374371	-0.0361687
4736.73	-0.00410349	-0.175709	0.0182895	-0.209366	-0.300366	0.00534355	0.0391319	0.0272767
4748.16	-0.00162388	-0.016037	-0.00778447	-0.226872	-0.13863	-0.00357064	-0.0280658	-0.0185769
4759.62	-0.0428799	-0.0176269	-0.000549485	-0.0947471	0.283505	0.00136791	-0.00940229	0.0103022
4771.07	-0.0145078	-0.0136312	0.00691798	-0.165017	0.196004	0.000595523	0.214867	-0.00365706
4782.49	-0.0240885	-0.014425	-0.00839325	-0.208529	0.193179	-0.00186008	-0.0385253	-0.00224019
4793.99	-0.0156069	-0.0548418	0.00708842	-0.110035	0.228918	0.00229681	-0.176884	0.00474329
4805.37	0.00852485	0.0117165	-0.00319249	-0.187655	-0.0157563	-0.00203137	-0.0180241	-0.00578298
4816.88	0.00412381	0.00529507	-0.00418392	-0.29016	-0.205631	0.00133741	0.173214	0.00554608
4828.29	0.082619	-0.0137277	0.0112065	-0.186995	-0.375539	-0.000517683	0.00370042	-0.00412126
4839.72	0.00693067	0.0162439	-0.017674	-0.160636	-0.29674	-0.000185539	-0.0872811	0.00204207
4851.25	-0.0159321	0.0248064	0.0206724	-0.0142601	-0.410687	0.000632597	0.290584	5.52904e-07
4862.55	0.0216451	-0.0253803	-0.017299	0.121461	-0.380245	-0.00078841	0.0404672	-0.00146856
4874.19	-0.0256256	-0.0147315	-0.00209372	-0.0431158	0.0326039	0.000698818	-0.0673813	0.00213658
4885.43	0.021991	0.0145383	0.213944	0.0033575	-0.229473	-0.00045557	0.129467	-0.00205068
4897.04	-0.0201629	-0.0104143	0.091066	-0.0603325	-0.543202	0.000162265	-0.0151625	0.00143937
4908.49	0.00552764	0.00694998	-0.0468571	-0.210887	-0.249994	9.02492e-05	0.0224159	-0.000605791
4919.75	0.0156795	0.0303487	0.0256315	-0.0213594	-0.28358	-0.000245165	-0.0323394	-0.000163043
4931.79	-0.0930656	0.0164725	-0.009439	0.00135116	-0.358694	0.000276808	-0.155091	0.000676113
4942.33	0.265787	-0.0656345	-0.00312425	-0.351847	0.612604	-0.000191602	0.0198041	-0.000805466

## Sheet: equalgrp
Time	Fly1	Fly2	Fly3	Fly4	Fly5	Fly6	Fly7	Fly8	Fly9	Fly10
9.04816	0.0461042	-7.16821e-06	2.21888e-06	-2.6873e-06	6.16681e-06	1.32509e-06	8.43856e-06	1.05263e-06	-1.65457e-05	1.01202e-06
20.6654	-0.0304856	5.77022e-06	-8.26594e-07	1.26414e-06	-7.00486e-06	1.74516e-06	-6.24614e-06	4.57035e-07	2.34813e-05	-1.392e-07
32.0169	0.0224984	-1.79902e-06	-1.43271e-06	1.18975e-06	5.77909e-06	-5.49764e-06	9.84343e-07	-2.44039e-06	-2.52239e-05	-1.14653e-06
43.516	-0.0222295	-4.4526e-06	4.14286e-06	-4.25958e-06	-2.04907e-06	8.92432e-06	6.81671e-06	4.41192e-06	1.90018e-05	2.57468e-06
54.9464	0.0125059	1.17835e-05	-6.55832e-06	7.14488e-06	-3.94672e-06	-1.0708e-05	-1.55301e-05	-5.68721e-06	-3.62927e-06	-3.7126e-06
66.3754	-0.0104202	-1.81183e-05	7.7234e-06	-8.77407e-06	1.10892e-05	9.54691e-06	2.25342e-05	5.53562e-06	-1.94215e-05	4.04675e-06
77.8637	0.0022187	2.08574e-05	-6.71375e-06	8.06048e-06	-1.73961e-05	-4.61007e-06	-2.47004e-05	-3.41281e-06	4.54163e-05	-3.12589e-06
89.2613	0.00124109	-1.75532e-05	2.96809e-06	-4.27051e-06	2.03444e-05	-3.97977e-06	1.92594e-05	-7.73776e-07	-6.66272e-05	7.42689e-07
100.751	-0.00341279	6.81793e-06	3.36661e-06	-2.57587e-06	-1.75138e-05	1.47895e-05	-4.90578e-06	6.44413e-06	7.37437e-05	2.8929e-06
112.171	0.00477122	1.07557e-05	-1.11896e-05	1.1397e-05	7.46372e-06	-2.50216e-05	-1.714e-05	-1.22643e-05	-5.84202e-05	-7.05149e-06
123.626	-0.00482641	-3.19701e-05	1.8427e-05	-1.99784e-05	9.36072e-06	3.09082e-05	4.24962e-05	1.62911e-05	1.65554e-05	1.05185e-05
135.079	0.00370703	5.10362e-05	-2.23397e-05	2.52624e-05	-2.99935e-05	-2.86037e-05	-6.38078e-05	-1.63869e-05	4.85194e-05	-1.181e-05
146.511	-0.00192053	-6.04847e-05	2.01889e-05	-2.40491e-05	4.8916e-05	1.54774e-05	7.20385e-05	1.08751e-05	-0.000124081	9.57132e-06
157.976	0.000141676	5.30374e-05	-1.01806e-05	1.404e-05	-5.88917e-05	8.47114e-06	-5.88825e-05	6.89402e-07	0.000188472	-3.09816e-06
169.408	0.00117892	-2.41964e-05	-7.52104e-06	4.99315e-06	5.27416e-05	-3.95133e-05	1.99317e-05	-1.68515e-05	-0.000214829	-7.14923e-06
180.864	-0.00183519	-2.50436e-05	3.00318e-05	-3.02642e-05	-2.58421e-05	6.99165e-05	4.21739e-05	3.39635e-05	0.000178162	1.92178e-05
192.307	0.00185225	8.624e-05	-5.16037e-05	5.56713e-05	-2.12123e-05	-8.89355e-05	-0.00011571	-4.65249e-05	-6.47582e-05	-2.97103e-05
203.753	-0.00141064	-0.000143298	6.44091e-05	-7.25132e-05	8.06315e-05	8.52555e-05	0.000180111	4.83037e-05	-0.000118382	3.43514e-05
215.204	0.000746285	0.000174819	-6.03693e-05	7.14015e-05	-0.000137104	-5.06533e-05	-0.000209363	-3.41777e-05	0.000337287	-2.90923e-05
226.645	-7.42117e-05	-0.000159263	3.38353e-05	-4.5212e-05	0.000169929	-1.58765e-05	0.000178693	2.3647e-06	-0.000531451	1.16016e-05
238.098	-0.00045316	8.23214e-05	1.54504e-05	-7.50894e-06	-0.000157901	0.000104755	-7.3624e-05	4.35655e-05	0.00062361	1.72091e-05
249.541	0.000756989	5.51354e-05	-8.00124e-05	7.96706e-05	8.64185e-05	-0.000194691	-0.000100739	-9.36828e-05	-0.000539387	-5.21357e-05
260.989	-0.000823262	-0.000231024	0.000143992	-0.000154518	4.47137e-05	0.000255121	0.000313292	0.00013246	0.000234137	8.36755e-05
272.436	0.000684084	0.000400829	-0.000185108	0.000207387	-0.000215205	-0.000252872	-0.000506785	-0.00014179	0.000279284	-9.95161e-05
283.882	-0.000397773	-0.000503585	0.000179648	-0.000210925	0.000382749	0.000162514	0.000606585	0.000106154	-0.000911045	8.76426e-05
295.331	3.3805e-05	0.000475955	-0.000110015	0.000143379	-0.000488463	2.16143e-05	-0.000539081	-1.90568e-05	0.00149322	-4.06484e-05
306.776	0.000335425	-0.000272898	-2.66779e-05	1.66208e-06	0.000470264	-0.000275194	0.000257426	-0.000110973	-0.00180492	-3.97942e-05
318.224	-0.00063791	-0.000109341	0.000211461	-0.000206794	-0.000282777	0.000539828	0.000231072	0.000257088	0.00162571	0.000139855
329.67	0.000804755	0.00061464	-0.000400819	0.00042691	-8.03729e-05	-0.000729035	-0.000844583	-0.000375756	-0.000810963	-0.000233496
341.117	-0.000776847	-0.00112073	0.00053124	-0.000592896	0.000568356	0.000746377	0.00142332	0.000414763	-0.000626913	0.000286547
352.564	0.000517936	0.0014524	-0.000532619	0.000624635	-0.0010665	-0.000514407	-0.00175178	-0.00032743	0.0024554	-0.000264717
364.011	-3.29534e-05	-0.00141856	0.000349981	-0.00045301	0.00140764	8.79077e-06	0.00161138	9.07871e-05	-0.0042048	0.000143959
375.458	-0.000613065	0.000874116	3.048e-05	4.88081e-05	-0.00140522	0.000711893	-0.000856411	0.000276966	0.00522688	7.86723e-05
386.905	0.00128315	0.000204622	-0.00055852	0.000546936	0.00090906	-0.00149161	-0.000504177	-0.000704933	-0.00484868	-0.000374687
398.352	-0.00177396	-0.00165423	0.00111067	-0.00120192	0.000121875	0.00208771	0.00225088	0.00107035	0.00261595	0.000675205
409.799	0.00185114	0.00311168	-0.00150397	0.0017002	-0.00154666	-0.00221379	-0.00394046	-0.00121654	0.00144211	-0.000870429
421.245	-0.00131932	-0.00406896	0.00153938	-0.00179144	0.00301086	0.00161955	0.00495854	0.00099539	-0.00662185	0.00082676
432.692	0.000110085	0.00397652	-0.00107944	0.0012716	-0.00399211	-0.000199533	-0.00478113	-0.000336805	0.0114655	-0.000418841
444.139	0.00160664	-0.00261254	9.36315e-05	-0.000132603	0.00390909	-0.00191015	0.00298566	-0.00072532	-0.014245	-0.000366578
455.586	-0.00336641	7.23365e-05	0.00130614	-0.00135918	-0.00245932	0.00422828	0.000503687	0.00195444	0.0135765	0.00130616
467.033	0.00450865	0.00316366	-0.00291194	0.00271757	-0.000154646	-0.00596182	-0.00579726	-0.00297337	-0.00928577	-0.00184652
478.48	-0.00459511	-0.00738684	0.00433571	-0.00380645	0.00309938	0.00613236	0.0121498	0.00327953	0.000982057	0.00158548
489.927	0.00387967	0.0134725	-0.00469098	0.00522939	-0.00607101	-0.0042122	-0.012748	-0.00239389	0.0152059	-0.00124683
501.374	-0.00143104	-0.0114676	0.0047134	-0.00493811	0.0108333	0.00108155	0.0191994	0.00228488	-0.0278126	0.000106237
512.821	-0.00196465	0.0167441	-0.00162335	0.00463951	-0.0115147	0.00447967	-0.0103287	0.00173077	0.0483035	-0.000446574
524.267	0.00580863	-0.00581807	-0.00402797	-0.00117405	0.0149349	-0.00879989	0.00243245	-0.00366933	-0.0583649	0.00174115
535.714	-0.00970527	-0.00116508	0.014043	-0.00248111	-0.0110145	0.0144708	0.0274294	0.00777835	0.0771609	-0.00933672
547.161	0.0151076	0.0262708	-0.0313012	0.0157814	0.00976623	-0.0143379	-0.224333	-0.0196187	-0.104094	0.0163365
558.608	-0.0846662	-0.42335	-0.0468264	-0.140315	-0.00632604	0.00100895	-0.620486	-0.056794	-0.671521	0.110077
570.055	-0.0438248	-0.880151	-0.106094	-0.123768	-0.370859	-0.125909	-1.04464	-0.241234	-0.579958	0.0312303
581.502	0.0663035	-1.05655	-0.107388	-0.040868	-0.366955	-0.150946	-0.900271	-0.339106	-0.763225	0.0629373
592.949	-0.0452378	-1.06191	0.0218022	-0.232103	-0.335246	-0.0858805	-0.52066	-0.155292	-0.838985	0.172667
604.396	0.0360993	-0.939606	-0.0112247	-0.214987	-0.573981	-0.328023	-0.276974	-0.0293185	-0.858228	-0.0205823
615.842	0.0220808	-1.04002	-0.162752	-0.121407	-0.312947	-0.0673898	-0.124407	0.0729416	-0.957751	0.180712
627.289	0.153943	-1.15429	-0.24466	-0.0768436	-0.136005	0.111628	-0.210993	-0.00977416	-0.578021	0.590314
638.736	0.503607	-1.18643	-0.272675	-0.0434617	-0.120057	-0.0977058	0.698759	0.0165957	-0.784585	0.74016
650.183	0.480606	-1.12382	-0.0804983	-0.108283	-0.0703523	0.0246912	1.02812	0.296362	-0.752243	0.743595
661.63	0.569303	-0.953885	0.237667	0.120817	-0.212602	0.0256877	0.217337	0.392975	-0.477621	0.815547
673.077	0.512627	-0.962608	-0.0423288	0.118996	-0.0249181	0.153056	0.368967	0.516746	-0.71497	1.06031
684.524	0.264779	-0.95944	-0.288853	-0.0871141	0.108211	0.288237	0.333151	0.318376	-0.622984	0.890498
695.971	0.25296	-0.824022	-0.143141	0.0638232	-0.040052	0.292476	0.450663	0.115392	-0.431089	0.789162
707.418	0.270648	-0.614176	-0.323777	0.0258532	0.0140526	0.359304	0.878649	0.191025	-0.526024	0.831397
718.864	0.372137	-0.403083	-0.359188	0.200395	0.041071	0.400197	0.945954	0.316352	-0.507509	1.09249
730.311	0.333015	-0.224733	-0.299101	0.483605	0.197307	0.492587	1.21618	0.640758	-0.246335	1.40814
741.758	0.305231	-0.0463212	-0.232373	0.379242	0.157256	0.306277	1.26225	0.586468	-0.142506	1.17064
753.205	0.413998	-0.057211	-0.13079	0.31792	-0.0165484	0.405676	1.65691	0.633005	-0.0843791	1.34204
764.652	0.335423	-0.000590004	-0.320909	0.00697486	0.314686	0.578443	1.75767	0.779367	-0.0613437	1.23456
776.099	0.329852	0.0274622	-0.319864	-0.042899	0.334771	0.413399	1.70122	0.62066	0.317521	0.87638
787.546	0.495776	0.107861	-0.584539	0.256087	0.390049	0.513706	1.98437	0.746968	0.778359	1.19363
798.993	0.489868	0.258056	-0.692249	0.276074	0.701031	0.566035	1.57453	0.749046	0.315977	1.16154
810.44	0.378744	0.122803	-0.0301735	0.419274	0.672173	0.616027	1.61941	0.790275	0.294114	0.920278
821.886	0.175804	0.156694	-0.328013	0.383515	0.782849	0.702405	2.05598	1.03787	0.472665	1.02061
833.333	0.0168878	0.259477	-0.445128	0.217831	0.704363	0.719119	2.29506	0.940757	0.184606	1.19704
844.78	0.209136	0.263938	0.116635	0.201138	0.437948	0.533589	2.47457	0.994017	0.313782	1.05713
856.227	0.014106	0.327585	-0.243349	0.0718417	0.342689	0.334151	2.63328	1.08433	0.116421	0.709266
867.674	-0.0495187	0.291738	-0.154197	0.148709	0.0998342	0.424339	2.61309	0.965373	-0.0212507	0.730168
879.121	0.310957	0.180944	-0.146605	0.245247	0.00587861	0.359393	2.41162	1.11409	0.262282	0.845265
890.568	0.182469	0.225678	-0.397688	0.0955489	0.0681989	0.367073	2.61823	1.21948	0.25843	0.992504
902.015	0.0785777	0.0951823	-0.0602699	-0.0287145	-0.181952	0.256981	2.38072	1.0478	0.304001	0.998097
913.462	-0.086481	-0.0767206	-0.110974	-0.134434	-0.354598	0.0439001	2.49765	0.850547	0.302948	0.652813
924.908	-0.370629	0.0969309	-0.28082	-0.177973	-0.282886	0.210695	2.55925	1.10234	0.264875	0.505945
936.355	-0.47719	-0.0975062	-0.376278	-0.334086	-0.250971	0.276811	2.36193	1.33886	0.159575	0.241237
947.802	-0.568453	-0.157345	-0.364308	-0.533801	-0.119478	0.231336	2.47404	1.26683	-0.0447104	0.40982
959.249	-0.593055	-0.0442875	-0.256557	-0.449264	-0.120218	0.220402	1.34076	1.35335	0.0552828	0.573467
970.696	-0.752583	-0.345118	-0.199737	-0.278447	-0.154297	0.296244	1.61123	1.26687	-0.0965615	0.436075
982.143	-0.801726	-0.366303	-0.135839	-0.0950352	-0.0162379	0.423735	2.70075	1.71045	-0.287095	0.971166
993.59	-0.831892	-0.25932	-0.0807096	-0.148505	-0.0297817	0.308061	2.3521	1.95208	-0.50419	0.831727
1005.04	-0.957311	-0.144512	-0.169818	-0.0722438	-0.0613213	0.28657	2.52986	1.48284	-0.860735	0.508066
1016.48	-0.850438	-0.0993798	-0.32077	0.0548553	-0.0388596	0.341636	2.65659	1.26602	-0.368472	0.615089
1027.93	-0.847529	-0.113578	-0.204058	-0.123725	0.019639	0.204197	1.98867	1.35326	-0.105714	0.602226
1039.38	-0.956918	0.0619275	-0.179073	0.0561719	-0.0555468	0.255174	1.89428	1.74595	-0.367726	0.642855
1050.82	-0.906771	-0.00303674	0.0380853	0.0463801	-0.335424	0.376159	2.56901	1.1963	-0.345803	0.474793
1062.27	-0.598244	0.0287193	0.437026	-0.0448007	-0.368033	0.26455	2.72952	1.19808	-0.525012	0.43194
1073.72	-0.426461	0.0336952	0.225231	0.239838	-0.296189	0.209151	2.40629	1.89567	-0.611418	0.199807
1085.16	-0.534752	-0.0585282	0.0781843	0.0425956	-0.300094	0.243111	1.91445	1.55022	-0.423926	-0.0761767
1096.61	-0.450376	0.16524	0.461231	-0.0101317	-0.414873	0.064937	1.53882	1.77272	-0.294253	0.0524597
1108.06	-0.135536	0.15418	0.51076	0.203131	-0.537675	-0.132927	1.57237	1.76289	-0.350683	-0.0470281
1119.51	0.0868471	0.0769684	0.534689	0.108877	-0.249176	-0.0964795	1.42517	1.47704	-0.253429	-0.372722
1130.95	-0.0972061	0.180747	0.741067	0.362578	-0.0436222	-0.115754	1.49109	1.61324	-0.113629	-0.354304
1142.4	-0.262637	0.13715	0.52302	0.355154	0.132693	-0.160375	1.69281	1.15857	-0.271225	-0.0848401
1153.85	-0.199412	0.128336	0.466516	0.174574	0.370189	-0.119359	1.84974	1.29231	-0.124321	-0.101216
1165.29	0.00602775	0.314766	0.598447	0.261903	0.302287	-0.0618065	2.41008	1.3465	0.163229	-0.252013
1176.74	0.0376231	0.295174	0.614456	0.231323	0.460167	0.0525851	2.71214	0.940134	0.2294	-0.249123
1188.19	-0.112332	0.101987	0.755228	0.288674	0.558517	0.126567	2.57158	1.31438	0.349664	-0.00308604
1199.63	-0.0933148	0.216023	0.707689	0.186068	0.648295	0.222265	2.53837	1.47305	0.362141	0.154722
1211.08	-0.291923	0.236883	0.48346	0.260298	0.906665	0.197243	2.45491	1.26522	0.153316	-0.034604
1222.53	-0.435456	0.188922	0.552043	0.329165	0.965747	0.0815629	2.22306	1.08887	0.106334	0.0361193
1233.97	-0.484929	0.144752	0.635142	0.276055	1.02645	0.188892	2.10474	1.05798	0.26975	0.115256
1245.42	-0.477027	0.0724213	0.416802	0.389817	0.881036	0.172178	2.16039	1.16573	0.201823	0.0399331
1256.87	-0.277566	0.187526	0.367292	0.197733	0.895376	0.114311	2.28073	1.22941	0.0241993	0.106762
1268.31	-0.313142	-0.00140219	0.480669	0.0823653	0.898305	0.230605	2.17461	1.40035	0.0514824	-0.0157927
1279.76	-0.238341	0.070772	0.443298	0.166179	0.652906	0.172251	2.08627	1.23469	0.0870691	0.025114
1291.21	-0.206341	-0.053119	0.487817	0.247832	0.967615	0.134073	2.12404	0.9708	0.040231	0.0334379
1302.66	-0.235623	-0.536904	0.458619	0.144284	1.13089	0.153586	1.86339	0.773864	-0.0194792	-0.134153
1314.1	-0.158771	-0.144116	0.498345	0.0501207	0.784502	0.100059	1.85522	0.755868	-0.12367	0.0246624
1325.55	-0.288456	0.0544085	0.561297	0.202241	0.643818	0.148053	1.9884	0.961962	-0.00320879	-0.000731349
1337	-0.202867	0.042505	0.357616	0.129723	0.693288	0.104607	1.77784	0.424755	0.130942	-0.0488824
1348.44	-0.00503453	0.257264	0.450296	0.0577718	0.742534	0.0525414	1.91493	0.255411	0.00331675	0.0246741
1359.89	-0.0613253	0.176503	0.345974	-0.0917989	0.505673	0.0720416	1.7475	0.934912	-0.00958519	0.0327903
1371.34	-0.171726	0.26225	0.0892738	-0.131338	0.196103	0.01115	1.59989	1.12948	0.0107716	0.0370903
1382.78	-0.143388	0.407444	-0.0152405	-0.0713981	0.187121	-0.0122968	1.88733	1.13468	-0.00975648	-0.062589
1394.23	-0.177296	0.363286	0.0575817	-0.213396	0.111469	0.00781264	1.42486	1.16949	0.0080137	0.134002
1405.68	-0.0419592	0.302143	0.32436	-0.000818699	0.0312205	0.0173585	1.33374	1.00921	-0.00515171	0.171483
1417.12	0.146142	0.225525	-0.316497	-0.00681554	-0.106696	-0.0336014	1.43057	1.20118	0.00192023	0.116782
1428.57	0.0178752	0.240102	-0.238492	-0.356661	-0.18763	-0.0610434	1.10022	1.18933	5.26137e-05	0.193721
1440.02	0.0529026	0.218993	0.339649	-0.506253	-0.0365172	-0.0496194	1.19375	0.527889	-0.00154118	0.13216
1451.47	-0.000470772	0.0260743	0.00688726	-0.542716	0.00777849	-0.054844	1.14703	0.835813	0.00245547	0.263843
1462.91	-0.090388	0.0675427	0.195257	-0.503555	0.123905	-0.00568138	1.19766	1.48251	-0.00259371	0.0950472
1474.36	-0.112837	0.0459631	-0.0869959	-0.375719	-0.0396481	0.0133473	1.24596	1.42796	0.00204359	0.0947462
1485.81	-0.0913089	-0.0527956	-0.640346	-0.26669	-0.0438731	-0.0258625	1.02004	1.15925	-0.00111822	0.33996
1497.25	0.0734333	0.0493428	-0.194587	-0.383226	0.111612	0.0933315	1.09963	1.31144	0.000170127	0.235028
1508.7	-0.0303531	-0.0673308	0.236964	-0.0855299	-0.0229751	0.251163	1.058	1.42221	0.000542955	0.219921
1520.15	0.140443	-0.0809747	0.264703	0.0242935	0.10276	0.141565	1.04269	0.927891	-0.000897256	0.107671
1531.59	0.311226	0.0270515	0.0772317	-0.420792	0.107248	0.118111	1.16363	1.30155	0.000900913	0.185873
1543.04	0.249865	0.0236522	-0.0366419	-0.176029	0.192302	0.179392	1.34832	1.55231	-0.000654041	0.293909
1554.49	0.368674	0.0937616	0.0940267	0.0360505	0.162725	0.0566994	1.5903	1.11516	0.000296062	0.215241
1565.93	0.242518	0.120824	-0.00896625	-0.0108164	0.072816	0.0946435	1.54965	1.19065	3.9562e-05	0.250163
1577.38	0.173735	0.101786	-0.161341	0.00168803	0.350547	0.139234	1.4977	1.32343	-0.000255924	0.215001
1588.83	0.190587	0.0743772	-0.0550497	-0.0504788	0.309708	0.124762	1.68335	1.30164	0.000308187	0.246907
1600.27	0.162524	-0.0331371	-0.136054	0.37806	0.441903	0.127187	1.96305	1.12585	-0.000205839	0.296915
1611.72	0.15571	0.128653	-0.181535	0.459762	0.696606	0.0205306	1.95759	1.04423	3.98442e-06	0.234496
1623.17	0.0893237	0.182546	-0.0822773	0.254046	0.694703	0.0068973	1.91206	1.15456	0.000213466	0.252305
1634.62	0.0654786	-0.061673	-0.218067	0.405692	0.795733	-0.0237826	2.10873	1.04627	-0.000355707	0.169436
1646.06	-0.0181457	0.101388	-0.161217	0.327988	0.794036	0.0362189	2.24708	1.144	0.00034884	-0.0963946
1657.51	0.0482854	0.0566231	-0.0503895	0.555181	0.756448	-0.0767516	2.37434	1.23736	-0.00015809	0.372894
1668.96	-0.0193692	-0.156705	-0.0208651	0.595491	0.825633	-0.0737532	2.51533	1.22687	-0.000195598	0.592147
1680.4	-0.151301	-0.0751472	0.0440365	0.293281	0.869698	0.282075	2.58569	1.34682	0.000628965	0.0668521
1691.85	-0.0555544	-0.0658803	-0.222896	0.334458	0.739425	0.0549623	2.88765	0.762187	-0.00100428	0.167263
1703.3	-0.132944	0.103071	-0.189806	0.498275	0.566805	-0.0719546	3.08749	0.42552	0.00115559	0.203823
1714.74	0.0511321	0.188849	-0.11819	0.701804	0.630989	0.0175326	2.77693	0.937309	-0.000934847	0.229253
1726.19	-0.24146	0.322494	-0.409234	0.391976	0.552349	-0.0130934	3.24573	1.07535	0.000272743	0.422594
1737.64	-0.651563	0.511645	-0.169632	0.480457	0.439319	0.0372968	3.74719	0.951985	0.000764116	0.301375
1749.08	0.0888655	0.42673	-0.0808178	0.5211	0.719696	-0.0353432	3.23345	0.630169	-0.00194529	0.407261
1760.53	0.18001	0.336214	-0.373893	0.291532	0.753947	0.0777824	3.42433	0.624455	0.00289558	0.550748
1771.98	-0.122596	0.146591	-0.424428	0.615648	0.579768	0.219244	3.76557	0.885407	-0.00321935	0.453173
1783.42	-0.0763386	0.10894	-0.545638	0.334919	0.344754	0.310007	3.4657	0.27966	0.00266631	0.373541
1794.87	-0.229307	0.0267731	-0.356105	0.408746	0.144153	0.183356	3.40794	0.18817	-0.00125887	0.413372
1806.32	-0.0637819	-0.065073	-0.093035	0.525979	0.235764	0.0167917	3.54335	0.336545	-0.00100315	0.49459
1817.77	-0.0809204	-0.0362606	-0.195185	0.193367	0.148351	0.253119	3.66209	-0.453929	0.00461094	0.436908
1829.21	-0.0595298	-0.347925	0.0109722	0.309554	0.237809	0.364598	3.54329	-0.237461	-0.00809082	0.240181
1840.66	0.128317	-0.275574	0.141481	0.238371	0.334676	0.442036	3.34468	0.127205	0.0119316	0.236769
1852.11	0.00272757	-0.354201	0.0725795	0.14038	0.376502	0.678776	3.02931	0.00413725	-0.0135928	0.330234
1863.55	0.119167	-0.809783	0.0297997	0.00659889	0.666175	0.796247	2.94377	0.368191	0.0133606	0.275889
1875	0.182018	-0.847224	-0.0563003	0.0544998	0.679292	0.735355	3.34061	0.298839	-0.00314325	0.356657
1886.45	0.216041	-1.01614	0.0573944	0.00299105	0.54785	0.666338	3.16237	0.254839	-0.110055	0.473932
1897.89	0.365257	-0.952534	-0.0731191	-0.202933	0.49551	0.784124	2.85347	0.222718	-0.027513	0.398825
1909.34	0.0710263	-0.804961	-0.0896453	0.0339973	0.607868	0.835872	2.7561	0.0974305	-0.0486871	0.481745
1920.79	0.33135	-0.897731	-0.0554115	-0.0635467	0.608628	0.798365	2.5667	0.312818	-0.127402	0.783656
1932.23	0.623121	-0.623788	-0.374887	-0.231706	0.577143	0.812401	2.72838	0.36186	-0.105572	0.953929
1943.68	0.185003	-0.274801	-0.143677	-0.66709	0.514322	0.835308	2.65829	0.324344	-0.22806	1.14726
1955.13	0.221553	-0.103268	0.0583524	-0.487211	0.133324	0.919598	2.37925	0.467781	-0.326956	1.39314
1966.58	0.156446	0.177478	-0.22318	0.115096	0.158012	1.03457	2.43995	0.697747	-0.330423	1.44451
1978.02	0.00497817	0.372919	-0.190717	-0.143908	0.266323	1.04242	2.31802	0.654283	-0.394046	1.33746
1989.47	-0.166463	0.236687	0.0407565	0.0664504	0.166012	0.98561	2.11013	0.772501	-0.420052	1.15711
2000.92	-0.400372	0.0853977	0.0350457	-0.173469	0.35218	0.984706	1.86988	0.753186	-0.403661	1.20166
2012.36	-0.321684	-0.142106	-0.041207	-0.526327	0.338263	0.731782	1.5096	0.599114	-0.491009	1.34453
2023.81	-0.526222	-0.299071	0.14113	-0.288849	0.148234	0.570542	1.40706	0.951058	-0.479356	1.30182
2035.26	-0.606905	-0.283084	0.0398713	-0.19314	0.422615	0.802385	1.34471	0.937935	-0.459471	1.32322
2046.7	-0.463504	-0.529589	-0.17861	-0.159141	0.693483	0.61049	1.11408	0.94326	-0.541674	1.12945
2058.15	-0.422856	-0.591997	-0.115097	-0.621007	0.767166	0.450599	1.22332	1.08637	-0.56374	0.699427
2069.6	-0.567101	-0.383943	-0.193247	-0.53646	0.730525	0.634077	1.37956	1.22712	-0.698532	0.803871
2081.04	-0.612081	-0.174118	-0.203504	-0.102707	0.149663	0.469961	1.32402	0.766812	-0.899622	0.955607
2092.49	-0.526564	-0.0291064	-0.236766	-0.0836911	0.116288	0.360257	1.4731	0.148353	-1.02598	0.608809
2103.94	-0.654963	-0.0690984	-0.251473	-0.0819276	0.512644	0.452663	1.52407	1.05585	-0.841545	0.661718
2115.38	-0.748622	-0.140373	-0.115182	-0.0172446	0.458377	0.37012	1.51391	1.34397	-0.761461	0.743185
2126.83	-0.869851	-0.263588	-0.0900464	0.127611	0.641919	0.268878	1.31515	0.870826	-0.949551	0.561354
2138.28	-0.700139	-0.395931	0.0412951	0.032303	0.583444	0.224208	1.2945	0.833884	-0.797732	0.636721
2149.73	-0.566839	-0.310709	0.00221042	0.208909	0.360702	0.168796	1.41998	0.78551	-0.805711	0.611798
2161.17	-0.728641	-0.0162182	-0.166456	0.302969	0.369986	0.197787	1.01816	0.806835	-0.87806	0.737525
2172.62	-0.599899	-0.0131189	-0.179046	0.0238921	0.367641	0.0850836	0.968425	0.531833	-0.725856	0.569469
2184.07	-0.759535	-0.0042845	-0.174907	0.0646482	0.261247	0.0526809	1.18645	0.548749	-0.799477	0.24621
2195.51	-0.754028	0.235065	-0.00338371	0.150058	-0.0949138	0.248041	1.11491	0.525336	-0.830166	0.568412
2206.96	-0.695305	0.205138	-0.109693	0.303473	0.0392045	0.236976	1.16544	0.16897	-0.738446	0.487356
2218.41	-1.03932	0.143458	-0.062863	0.431138	0.13567	0.288087	1.31476	0.17533	-0.692392	0.323937
2229.85	-0.762498	0.279989	0.351807	0.181635	0.165877	0.332426	1.18586	0.015597	-0.692618	0.311933
2241.3	-0.608686	0.604297	0.395318	0.140812	0.798504	0.210332	0.990042	-0.240682	-0.658354	-0.00404934
2252.75	-0.652721	0.581039	0.30064	0.304338	0.733817	0.161141	1.02053	-0.231324	-0.576855	0.1438
2264.19	-0.593779	0.369092	0.0664749	0.272127	0.585752	0.280941	1.08304	0.00535002	-0.641992	0.120155
2275.64	-0.806552	0.484109	-0.319581	0.4679	0.630522	0.386496	1.12162	0.0582853	-0.621683	0.0816923
2287.09	-0.641603	0.473714	-0.587345	0.202735	0.344893	0.405026	1.22451	-0.184253	-0.625793	0.58493
2298.53	-0.7209	0.607249	-0.465846	-0.166604	0.589664	0.527741	1.43849	-0.242171	-0.719068	0.79428
2309.98	-0.897695	0.420731	-0.337946	0.117922	0.468364	0.395708	1.25765	-0.174187	-0.490239	0.635938
2321.43	-0.684038	0.328039	-0.277872	-0.0740935	0.432152	0.332983	1.0917	-0.137308	-0.493943	0.349362
2332.88	-0.781966	0.650417	-0.0591432	-0.202652	0.74984	0.245578	1.28936	-0.200514	-0.699514	0.635307
2344.32	-0.797044	0.347202	0.0290301	-0.182054	0.28287	0.137913	1.03724	-0.0306248	-0.623628	0.847442
2355.77	-0.725262	0.660433	0.272439	-0.367892	0.211168	0.379196	0.976421	0.00899154	-0.735796	0.457112
2367.22	-0.500586	0.506979	0.10545	-0.444377	0.178907	0.247505	1.06584	0.0480914	-0.821721	0.885438
2378.66	-0.384219	-0.117702	-0.0246039	-0.703317	0.072411	0.324706	0.819997	0.369859	-0.712331	1.33325
2390.11	-0.697677	0.363361	0.307146	-0.615621	0.482533	0.540699	0.911209	0.364496	-0.810442	0.971367
2401.56	-0.50661	0.352169	-0.0395856	-0.826188	0.182737	0.253338	1.24586	0.44316	-0.810591	0.970609
2413	-0.397065	0.324304	-0.171076	-1.29367	-0.000845709	0.211945	1.04514	0.480287	-0.7362	1.27131
2424.45	-0.379307	0.358374	-0.0269901	-1.12212	0.253287	0.343202	0.811323	0.590555	-0.718052	1.34594
2435.9	-0.154505	0.227589	-0.150963	-1.15526	-0.0401541	0.237086	1.03032	0.765222	-0.291608	1.74966
2447.34	-0.332937	0.115115	-0.0385971	-1.14947	0.0406938	0.410247	1.1311	0.664644	0.150024	1.93394
2458.79	-0.338573	-0.0829577	0.0491071	-0.899011	0.125982	0.665881	1.3597	0.759643	0.246577	1.48947
2470.24	-0.348635	0.205184	-0.0299204	-0.954082	0.073274	0.53369	1.31888	0.723416	0.376521	1.92544
2481.68	-0.432525	0.110771	-0.207209	-0.817164	0.435466	0.4758	1.14599	0.767533	0.281358	1.99791
2493.13	-0.45927	-0.176086	-0.535246	-0.564532	0.0978947	0.484795	1.13195	0.792298	0.177432	1.6111
2504.58	-0.511656	-0.0433432	-0.768773	-0.601039	-0.0185469	0.563868	0.865249	0.823098	0.292452	2.10112
2516.03	-0.553298	0.207048	-0.487519	-0.506585	0.2697	0.525095	0.912928	1.23901	0.362311	1.96641
2527.47	-0.750976	0.218953	-0.340837	-0.173891	-0.00987	0.506524	1.22557	1.08787	0.588111	1.7681
2538.92	-0.722746	0.17419	-0.440029	0.0687968	-0.118183	0.707864	1.35725	0.857316	0.615046	1.86609
2550.37	-0.641987	0.317196	-0.234686	0.0166727	-0.277373	0.70949	1.41014	0.963307	0.804433	1.62245
2561.81	-0.664765	0.206622	-0.196798	0.0508387	-0.723361	0.594877	1.3891	0.910759	1.17825	1.77299
2573.26	-0.720841	0.21982	-0.156902	0.183162	-0.748123	0.446332	0.908225	0.638782	1.12191	1.92625
2584.71	-0.784236	0.270492	0.168351	0.111741	-0.491475	0.548918	0.594654	0.251769	1.3314	1.57113
2596.15	-0.692164	0.200968	0.0919226	0.363156	-0.808428	0.697957	0.614148	0.231832	1.47144	1.30711
2607.6	-0.560442	0.316344	-0.1354	0.470803	-0.892279	0.606316	0.508326	0.270211	1.37452	1.45394
2619.05	-0.597137	0.246917	0.0303381	0.27762	-0.703401	0.619903	0.656013	0.104755	1.35254	1.29423
2630.49	-0.799298	0.0547587	0.0612248	0.150271	-1.11679	0.826152	0.679737	0.220658	1.25751	1.00448
2641.94	-0.789186	0.0812455	0.200915	-0.0638083	-0.480245	0.851877	0.805567	0.147541	1.39526	1.00281
2653.39	-0.704672	0.272242	0.0816391	0.0609955	-0.0126427	0.683825	0.787317	-0.367317	1.39701	0.794263
2664.84	-0.93535	0.19206	-0.345646	0.0436104	-0.844942	0.735492	0.658759	-0.372402	1.25196	0.766056
2676.28	-0.966725	-0.0614952	-0.197983	-0.0754635	-0.888642	0.835781	0.915741	-0.0696942	1.39149	0.86455
2687.73	-0.711046	0.0476982	0.0298868	-0.03446	-0.703259	0.761333	0.791837	0.0527816	1.39088	0.955876
2699.18	-0.726372	0.13936	0.41727	0.0708551	-0.619043	0.672566	0.701321	-0.2688	1.07694	1.04437
2710.62	-0.741532	-0.0361631	0.350372	0.342186	-0.926397	0.661488	0.921007	-0.397175	1.00057	0.957149
2722.07	-0.629379	-0.30859	-0.15017	0.258397	-0.816398	0.62475	0.797362	7.79867e-06	0.965704	0.860275
2733.52	-0.757638	-0.391782	-0.00576796	0.173101	0.221043	0.808041	0.472565	-0.144117	0.775133	0.566503
2744.96	-0.773263	-0.265272	0.163161	-0.0323042	-0.0425293	0.899746	0.681817	-0.0607818	0.905955	0.495464
2756.41	-0.577638	-0.505151	0.108409	-0.200785	-0.795703	0.757383	0.58085	0.187934	1.08332	0.582147
2767.86	-0.664062	-0.54463	0.0950636	0.170587	-1.00456	0.851096	0.512127	-0.20074	0.952943	0.570846
2779.3	-0.522074	-0.129073	0.371875	0.0921311	-1.06772	0.81128	1.0783	-0.16023	0.796262	0.502891
2790.75	-0.337317	-0.0632018	0.275654	-0.0975031	-1.13039	0.771872	0.78835	0.0819921	0.772555	0.398654
2802.2	-0.36836	0.000774268	-0.131091	0.0314982	-1.39012	0.899269	0.74247	-0.0419234	0.619489	0.313667
2813.64	-0.122178	0.0652652	0.316494	-0.0659051	-1.35511	0.904073	0.917279	0.404708	0.339471	-0.0654258
2825.09	-0.0935445	-0.096379	0.542335	-0.0181485	-1.25618	0.855573	0.650391	0.420672	0.329014	0.0922208
2836.54	0.0725026	-0.038016	0.103241	-0.00667319	-0.785744	0.882262	0.789739	-0.0969468	0.407845	0.68357
2847.99	0.257448	-0.0806809	0.0949007	-0.186637	-0.560213	0.853357	0.627879	-0.00424737	0.220223	0.556616
2859.43	0.0293464	-0.238549	0.284274	-0.423669	-1.11196	0.609339	0.518394	0.181004	0.106809	0.438406
2870.88	0.181054	-0.316803	0.00847266	-0.762449	-1.04966	0.51706	0.613173	0.495899	0.0198	0.465034
2882.33	0.201476	-0.438559	-0.14582	-0.762138	-1.00419	0.518547	0.446969	0.216525	-0.125657	0.311073
2893.77	0.0272923	-0.480878	-0.0796011	-0.602132	-0.963729	0.471214	0.344531	0.207277	0.315067	0.48196
2905.22	0.0631655	-0.341273	-0.0786025	-0.424616	-0.561991	0.558949	0.321578	0.649923	0.507726	0.529612
2916.67	-0.00661621	-0.276974	0.0884759	-0.228728	-0.514342	0.582573	0.705866	0.204785	0.188194	0.568117
2928.11	0.0901156	-0.254093	-0.0192182	-0.175996	-0.36363	0.642098	0.851168	0.372521	0.237543	0.531304
2939.56	0.0431443	-0.120397	-0.013689	0.054284	-0.381446	0.660242	0.32936	0.742824	0.197077	0.324012
2951.01	-0.135618	-0.154004	-0.390649	0.324979	-0.437255	0.578843	0.319248	0.666948	-0.0511278	0.570859
2962.45	-0.176972	-0.0458455	-0.901416	0.279063	-0.215857	0.74634	0.4637	0.806157	0.308634	0.391758
2973.9	-0.270129	0.0302419	-0.565021	0.226725	-0.179529	0.699597	0.165221	0.915931	0.76676	0.220868
2985.35	-0.253595	0.0248487	-0.909262	0.626898	0.117988	0.635347	-0.0983451	1.17807	0.0986507	0.392644
2996.79	-0.272507	0.19851	-1.28808	0.74991	0.181087	0.86227	-0.132179	1.06245	-0.0712474	0.178082
3008.24	-0.126532	0.0328735	-1.15281	0.242222	0.163087	0.761689	0.0493042	0.833971	0.519833	0.191393
3019.69	0.0282477	-0.107917	-1.35577	0.125819	0.573372	0.562113	0.104544	1.21944	0.0400868	0.299092
3031.14	-0.00471374	-0.0623671	-1.26252	0.192008	0.543753	0.568448	0.0100023	1.63707	0.0198088	0.314828
3042.58	-0.017433	-0.224325	-1.35933	0.0434405	0.356908	0.546798	0.0492984	1.62321	0.736918	0.151882
3054.03	-0.229186	-0.259637	-1.35599	-0.0395193	0.242684	0.506925	0.285757	1.4096	0.728464	0.273611
3065.48	-0.327104	-0.105866	-0.651279	-0.22814	0.404902	0.524819	0.538997	1.39977	1.03389	0.618471
3076.92	-0.303407	0.0290549	-0.604832	-0.31379	0.465234	0.619338	0.447839	1.49755	1.08585	0.340247
3088.37	-0.348062	-0.0298486	-0.873779	-0.339736	0.373224	0.851513	0.270075	1.42121	0.924975	0.666165
3099.82	-0.232098	-0.187522	-0.543299	-0.32659	0.51136	0.888835	0.374095	0.901685	1.47615	1.01082
3111.26	-0.00910815	-0.158095	-0.611363	-0.0395455	0.4379	0.709182	0.356805	1.06292	1.30887	0.825606
3122.71	-0.0689729	-0.058572	-0.897826	-0.0829604	0.770789	0.754613	0.525382	1.46577	1.24881	1.02337
3134.16	-0.41189	0.00846008	-0.511811	-0.225682	0.834921	0.959987	0.712206	1.07617	1.5788	0.909248
3145.6	-0.355382	-0.0835201	-0.446823	-0.196229	0.682602	0.878496	0.494634	1.27358	1.54303	1.04971
3157.05	-0.288338	-0.217695	-0.621772	-0.453382	1.15313	0.794533	0.775877	1.45019	1.67511	1.15608
3168.5	-0.508798	-0.0575005	-0.363181	-0.383564	0.838386	0.931043	0.924603	1.29926	1.54436	0.950071
3179.94	-0.641583	0.0405104	-0.692219	-0.0796529	0.670738	0.403823	0.915105	1.10068	1.53759	1.21602
3191.39	-0.900207	-0.128339	-0.573132	-0.337427	1.08141	0.0730143	1.18763	0.974174	1.37636	0.818194
3202.84	-0.947854	-0.387043	-0.0878893	-0.489567	0.821261	0.438643	0.974202	1.30617	1.19224	0.61006
3214.29	-1.00407	-0.482169	-0.592872	-0.479727	0.904306	0.259566	1.14278	0.917974	1.40549	1.12656
3225.73	-1.26879	-0.419716	-0.618404	-0.646889	0.866121	0.116039	1.14286	0.781657	1.2852	0.980757
3237.18	-1.15867	-0.727548	-0.488026	-0.233452	0.513326	0.028387	0.82796	1.30855	1.47286	0.886069
3248.63	-0.991596	-0.888135	-0.606572	0.1293	0.543735	-0.0649375	1.09486	1.13392	1.42582	0.923809
3260.07	-0.892765	-0.565598	-0.588769	0.112757	0.383534	0.0826996	0.731579	0.949748	1.27494	0.957549
3271.52	-0.87808	-0.360864	-0.673562	0.428911	0.37513	-0.183471	0.757708	1.1154	1.4891	0.935426
3282.97	-0.870781	-0.276051	-0.491395	0.659689	0.448662	-0.224518	0.897094	0.911484	1.27016	0.630894
3294.41	-0.727605	-0.393542	-0.500686	0.735761	0.456206	-0.0130935	0.711919	0.40087	1.45135	0.846749
3305.86	-0.664247	-0.621846	-0.51891	0.65725	0.549028	-0.0135161	1.0459	0.813804	1.49275	0.796888
3317.31	-0.491254	-0.554112	-0.445518	0.497743	0.548343	0.0342024	0.625722	1.37935	1.37459	0.643149
3328.75	-0.551312	-0.550089	-0.212172	0.577649	0.442791	0.157942	0.830594	1.14212	1.79097	0.916514
3340.2	-0.500964	-0.651573	-0.0250418	0.584324	0.111173	0.250005	1.0908	1.20618	1.94851	0.58142
3351.65	-0.210667	-0.274059	-0.545725	0.637432	0.0796144	0.220568	0.784163	1.05508	1.96168	0.432848
3363.1	-0.16041	-0.143902	-0.544242	0.598269	0.104027	0.34559	1.02601	0.880602	2.0255	0.515453
3374.54	-0.0634325	-0.303943	-0.383596	0.203282	0.169872	0.445188	0.86626	0.994956	2.24029	0.339304
3385.99	-0.218314	-0.109326	-0.528006	-0.0262919	0.629736	0.273727	0.961451	0.67279	2.34743	0.510972
3397.44	-0.252014	-0.147114	-0.152405	0.0723415	0.438267	0.195717	1.06615	1.18159	2.1856	0.621533
3408.88	-0.151471	-0.274597	-0.328856	0.169777	0.339883	0.0102134	0.794464	1.68052	2.1295	0.735321
3420.33	-0.381572	-0.177696	-0.325883	0.180141	0.487487	-0.0577372	0.726719	0.694796	2.09819	0.875466
3431.78	-0.272978	-0.0704486	0.0146275	0.15887	0.365599	0.0524878	0.643312	0.447218	2.06407	0.7833
3443.22	-0.0903019	0.0395276	-0.297664	0.122892	0.0799676	-0.1477	0.622854	1.04076	2.16561	0.869065
3454.67	-0.251427	0.141747	-0.340046	0.0772968	-0.136591	-0.302478	0.667806	0.825217	2.14628	0.762254
3466.12	-0.274987	0.163379	-0.564117	0.0316654	0.449332	-0.482449	0.815224	0.845569	1.89893	0.875138
3477.56	-0.324888	0.0975317	-0.686025	0.164669	0.507422	-0.512918	0.795242	0.647066	1.77772	1.38435
3489.01	-0.521465	-0.0969402	-0.359389	0.112942	0.281578	-0.361923	0.57366	-0.220847	1.591	1.05296
3500.46	-0.450206	-0.176676	-0.610155	-0.168174	0.366427	-0.517817	0.740053	0.251781	1.47815	0.745582
3511.9	-0.347997	-0.233845	-0.658566	-0.135474	0.493233	-0.551849	0.97747	1.18859	1.77796	1.16056
3523.35	-0.192119	-0.203668	-0.281969	-0.0631066	0.465753	-0.378348	0.990946	1.12699	1.91956	1.04386
3534.8	-0.0445421	0.0200563	-0.296927	-0.149584	0.152076	-0.236871	0.960926	0.908155	1.69057	0.690299
3546.25	-0.0559455	-0.406967	-0.451532	-0.211794	0.401807	-0.276247	1.03058	0.782268	1.64677	0.716388
3557.69	0.0146287	-0.571858	-0.47611	-0.0106787	0.373997	-0.423941	1.38684	0.629404	1.78576	0.581894
3569.14	-0.0290902	-0.454153	-0.423273	0.38729	0.352559	-0.399834	1.6323	0.686063	1.67592	0.513194
3580.59	0.22661	-1.05264	-0.448791	0.144569	0.6143	-0.47317	1.56826	0.767756	1.74463	0.77386
3592.03	0.183767	-0.826012	-0.635007	-0.25356	0.65105	-0.547872	1.67603	0.704828	1.74869	0.890848
3603.48	-0.175411	-0.286183	-0.618366	-0.0512112	0.957782	-0.518796	1.85294	0.493238	1.16141	0.862356
3614.93	-0.0667197	-0.601433	-0.487073	0.0767122	1.24516	-0.651084	1.76432	0.415022	0.626737	0.950819
3626.37	-0.0650625	-0.648724	-0.679034	0.180347	1.14407	-0.740739	1.48558	0.504561	0.0795375	0.748526
3637.82	-0.025591	-0.502669	-0.776991	0.175343	1.0132	-0.799864	1.37254	0.592006	-0.458074	0.43407
3649.27	-0.0655673	-0.578196	-0.781634	0.16022	1.19984	-0.844944	1.47451	0.656335	-0.761449	0.380023
3660.71	-0.17834	-0.602216	-1.02318	0.408968	0.95485	-0.640951	1.42807	0.61256	-0.843731	0.0332573
3672.16	-0.231715	-0.705985	-1.03384	0.377906	0.859566	-0.535454	1.5516	0.585596	-0.468677	-0.0897758
3683.61	-0.42227	-0.841775	-0.955321	0.416194	1.1715	-0.49474	1.34698	0.248639	-0.333336	0.0811846
3695.05	-0.449598	-0.756881	-1.02351	0.553891	1.10751	-0.1861	0.714354	0.345807	-0.543769	-0.0995677
3706.5	-0.314666	-0.862854	-0.823815	0.395366	1.03846	-0.223304	0.482341	0.397043	-0.388183	0.102487
3717.95	-0.266201	-1.081	-0.651607	0.43597	0.91246	-0.279027	0.160085	-0.0744723	-0.183231	0.189998
3729.4	-0.222738	-1.00301	-0.58504	0.476701	0.988099	0.0874309	-0.131155	0.510882	-0.128305	-0.123502
3740.84	-0.0747906	-0.944153	-0.428671	0.271038	0.74075	0.228253	-0.201498	0.609062	0.206307	-0.116082
3752.29	-0.0652428	-0.761857	-0.393443	0.316984	0.751721	0.30152	-0.145788	0.271504	0.418622	-0.243294
3763.74	-0.113098	-0.569503	-0.122483	0.195947	1.37069	0.306021	-0.0492676	0.441363	0.187722	-0.164808
3775.18	-0.0793025	-0.540497	0.194477	0.0270756	1.12291	0.24119	-0.0124316	0.363858	0.184566	-0.0231562
3786.63	-0.0594722	-0.404011	0.0572442	0.0188165	1.1386	0.324613	0.400018	0.557465	0.15127	-0.174476
3798.08	-0.0685687	-0.342378	-0.143015	-0.28336	1.34495	0.293613	0.467189	0.5379	0.133709	-0.0437855
3809.52	0.0804904	-0.177583	-0.116682	-0.305619	1.19623	0.26304	0.259237	0.570741	0.456979	0.043028
3820.97	0.234512	-0.00350107	0.156918	-0.346098	1.44703	0.440917	0.217676	0.878655	0.321318	-0.00728676
3832.42	0.182387	-0.00752201	0.277758	-0.4212	1.49547	0.44075	0.19252	0.997364	-0.00631531	0.0619908
3843.86	0.0774236	-0.0748894	-0.173173	-0.309945	1.46983	0.316491	0.397887	0.983986	0.0688733	0.12622
3855.31	-0.129198	-0.0355541	-0.376074	-0.475364	1.49126	0.35277	0.294512	0.999084	0.114496	-0.0164533
3866.76	-0.232788	0.161083	-0.186387	-0.136465	1.18104	0.351268	0.255401	1.09719	-0.0278219	0.0244248
3878.21	-0.232636	0.231961	-0.36492	-0.0393418	0.843595	0.332146	0.234103	0.931307	0.0357351	0.174914
3889.65	-0.298049	0.15292	-0.378388	-0.348667	0.943137	0.223042	0.200102	1.02853	0.179644	0.0834011
3901.1	-0.336089	-0.0337287	-0.233206	-0.208783	1.20081	0.14128	0.585519	1.04029	0.251823	-0.0148409
3912.55	-0.368651	0.0258326	-0.543094	-0.414899	0.994287	0.0996106	0.389481	0.961402	0.197984	-0.205578
3923.99	-0.361897	0.00946887	-0.50195	-0.583398	0.984502	-0.0495107	0.265147	1.16304	0.0883862	-0.171766
3935.44	-0.340695	-0.0473704	-0.277123	-0.757999	0.998908	-0.148551	0.564621	0.931951	0.300619	-0.00955076
3946.89	-0.199781	0.175334	-0.559053	-0.465112	0.509878	-0.117292	0.481753	0.926248	0.246387	0.0353463
3958.33	-0.0817924	0.051717	-0.28909	0.054214	0.532748	-0.193391	0.342298	1.17636	0.026051	0.161256
3969.78	-0.248133	0.086365	0.0286853	-0.361893	0.565549	-0.257833	0.408759	0.993942	0.128421	0.239645
3981.23	-0.272252	0.208773	-0.400504	-0.378307	0.314646	-0.184055	0.44595	1.07543	0.0464246	0.32217
3992.67	-0.169255	0.0136113	-0.471862	-0.231241	0.31712	-0.319864	0.111793	1.20368	-0.125625	0.414234
4004.12	-0.388445	-0.0792996	-0.414717	-0.375646	0.160153	-0.271154	0.0781118	1.04472	-0.0441346	0.488545
4015.57	-0.379587	-0.112556	-0.678518	-0.334114	0.0917326	-0.214763	0.339884	1.22121	0.0196384	0.381403
4027.01	-0.166736	-0.0164444	-0.729459	-0.0837697	0.264607	-0.233791	0.191642	1.2909	-0.102436	0.328618
4038.46	-0.258707	-0.0521976	-0.712269	-0.00977019	0.290884	0.0520187	0.260982	1.00628	-0.0594616	0.506918
4049.91	-0.182969	-0.180676	-0.615664	-0.355722	0.350533	0.0303142	0.264953	0.82488	0.0211805	0.260219
4061.36	-0.138818	-0.273786	-0.199526	-0.381231	0.152239	-0.000330571	0.190331	0.833376	-0.00452694	0.196105
4072.8	-0.295835	-0.392208	-0.314927	-0.267037	-0.0708495	0.191705	0.4639	0.931514	-0.0100921	0.331507
4084.25	-0.23836	-0.204418	-0.672149	-0.206113	0.170902	0.195548	0.491451	0.664284	0.0374194	-0.0668641
4095.7	-0.0660415	-0.189026	-0.605336	-0.13971	0.107455	0.0946352	0.428076	0.595818	0.116877	-0.0183781
4107.14	0.066936	-0.427831	-0.48316	-0.0577807	-0.0950776	-0.053294	0.39482	1.04304	-0.0142252	0.130973
4118.59	0.0497146	-0.321308	-0.441776	0.0139148	-0.081368	0.109309	0.427356	0.883285	-0.00355939	0.0429926
4130.04	-0.00362382	-0.269913	-0.678714	0.029177	0.0380362	0.0903029	0.314222	0.731103	0.0223808	0.38708
4141.48	0.0813428	-0.329413	-0.829888	0.131843	0.109258	-0.208525	0.146089	0.94752	-0.0541596	0.5108
4152.93	0.0706179	-0.430189	-0.61003	0.0973703	0.289478	-0.115447	0.204091	0.757421	0.185225	0.224813
4164.38	0.116117	-0.611158	-0.377636	0.0600791	0.433408	-0.160278	-0.113207	0.666305	0.142547	0.0052712
4175.82	0.299351	-0.648143	-0.489793	0.0385509	0.092809	-0.254968	-0.348256	0.608005	-0.0195232	0.0851994
4187.27	0.28129	-0.666128	-0.621756	-0.169006	0.0596905	-0.169708	-0.262192	0.496512	-0.0314596	0.106927
4198.72	0.337907	-0.546983	-0.745179	-0.390713	0.0454055	-0.181813	-0.155591	0.564397	-0.150799	-0.347898
4210.16	0.375346	-0.395415	-0.954394	-0.136933	-0.0488002	-0.157485	0.0431835	0.492847	-0.161421	-0.310112
4221.61	0.240034	-0.413015	-0.745801	-0.0143191	0.0780287	-0.243102	-0.0723767	0.707956	-0.184375	-0.513687
4233.06	0.202064	-0.605927	-0.811395	-0.216169	-0.0435029	-0.292302	-0.23328	0.92274	-0.162005	-0.958216
4244.51	0.0739122	-0.504882	-0.865481	0.168422	0.046817	-0.191897	0.0352165	0.649907	-0.155266	-0.225834
4255.95	0.019402	-0.424233	-0.501137	0.12129	0.14118	-0.208744	0.157244	0.629679	-0.157823	-0.200388
4267.4	0.0427419	-0.637873	-0.652495	-0.0378464	0.0382095	-0.263388	-0.163903	0.687349	-0.163457	-0.434763
4278.85	0.0163488	-0.380263	-0.856262	0.250174	0.342427	-0.316936	-0.231255	0.57162	-0.153634	-0.169852
4290.29	0.208684	-0.365513	-0.697386	0.00532842	0.436949	-0.319903	0.0677962	0.693579	-0.0285865	-0.28642
4301.74	0.329804	-0.379088	-0.379528	0.0131273	-0.0642619	-0.285558	0.138625	0.777338	-0.0726269	-0.199944
4313.19	0.30588	-0.170926	-0.206719	0.293021	-0.15769	-0.188736	0.201603	0.886184	-0.0841111	-0.0614844
4324.63	0.258448	-0.354082	-0.097557	0.197736	0.102058	-0.143037	0.426527	0.916418	-0.218166	-0.167982
4336.08	0.170658	-0.356446	0.279889	0.00541709	0.176283	-0.341	0.304829	0.802608	-0.194664	-0.178313
4347.53	0.127329	-0.415882	0.422361	0.107778	0.245589	-0.372598	0.309769	0.799817	0.179026	-0.0772052
4358.97	0.00824307	-0.664388	0.408337	-0.0149725	0.250114	-0.333429	0.481761	0.821096	0.142118	-0.218756
4370.42	-0.0267788	-0.523694	0.214729	-0.28069	0.261401	-0.24614	0.289461	0.947296	0.156325	-0.0145037
4381.87	-0.0620366	-0.420338	-0.00557706	-0.128061	0.258512	-0.00677576	0.295408	0.768805	0.166001	0.178233
4393.31	0.057395	-0.72593	0.134446	-0.326793	0.236915	-0.0779176	0.444837	0.893603	0.19385	0.268273
4404.76	0.342838	-0.530078	0.172967	-0.412103	0.280786	-0.141369	0.487296	0.972426	0.441845	0.440226
4416.21	0.314877	-0.445559	0.0359453	-0.347682	0.20173	-0.0689695	0.514283	0.662107	0.301857	0.110642
4427.66	0.212201	-0.766927	-0.0565678	-0.298017	0.215063	-0.178815	0.579348	1.11655	0.492846	-0.11621
4439.1	0.194766	-0.276967	0.0785465	-0.00602969	0.31484	-0.128872	0.77372	1.09199	0.70137	-0.0119887
4450.55	0.276881	-0.188059	-0.220989	-0.0939843	0.503383	-0.0314024	0.874285	0.87613	0.487636	0.112869
4462	0.300267	-0.484336	-0.660447	-0.0917138	0.504795	-0.101736	0.985659	1.20898	0.656269	-0.29137
4473.44	0.284125	-0.290671	-0.529809	0.0351594	0.160201	-0.000707813	0.932108	0.98881	0.720065	-0.37977
4484.89	0.253367	-0.45661	-0.54005	0.0258053	0.376595	0.00995133	0.787441	1.06582	0.713819	0.0391347
4496.34	-0.0296597	-0.651452	-0.447032	-0.015265	0.590293	-0.140795	0.702	1.03448	0.900725	-0.0872628
4507.78	-0.0521975	-0.547542	-0.588328	-0.0792424	0.243296	-0.0715453	0.847772	0.489797	0.91699	-0.108021
4519.23	0.0769411	-0.705871	-0.705934	-0.0380079	0.295675	-0.0468159	1.03067	0.589085	1.0381	-0.0830115
4530.68	-0.0483434	-0.618527	-0.459152	-0.146333	0.606776	-0.0844714	0.692824	0.453606	1.25896	-0.0599488
4542.12	-0.0273814	-0.539078	-0.722692	-0.0319085	0.594952	0.0986096	0.706688	0.422022	1.25796	0.124838
4553.57	0.172565	-0.615862	-0.4335	0.1465	0.538915	0.216656	0.60223	0.652711	1.16907	0.220098
4565.02	0.354343	-0.491548	-0.208048	-0.0756328	0.50948	0.150966	0.197198	0.157364	1.15787	0.205004
4576.47	0.212254	-0.841645	-0.683849	-0.173299	0.536812	0.290602	0.543215	-0.0889778	1.03895	0.0717331
4587.91	-0.0959781	-0.726615	-0.740411	-0.0193343	0.530337	0.383985	0.538877	0.0455953	1.07705	0.270623
4599.36	-0.0993017	-0.709824	-0.812936	-0.00427106	0.366625	0.194476	0.467804	0.742107	1.25896	0.352152
4610.8	-0.297886	-1.04007	-0.918741	0.000189365	0.488354	0.199727	1.1512	0.79845	0.974327	-0.055068
4622.25	-0.402019	-0.711414	-0.630732	0.25871	0.41663	0.156729	1.20042	0.259323	0.618139	0.133369
4633.7	-0.126214	-0.714837	-0.346592	0.261061	0.256844	0.0714984	0.893367	0.76055	0.381786	0.325303
4645.14	-0.116323	-0.504644	-0.383252	0.0503337	0.466378	0.0839334	0.888435	0.593945	0.171795	-0.105658
4656.6	-0.0954574	-0.27541	-0.23785	-0.0083919	0.360322	-0.0324946	0.7752	0.237153	0.0191599	0.138392
4668.04	-0.11493	-0.356868	-0.112329	0.0245143	0.416577	0.000453589	0.752121	0.35115	-0.0449282	0.388085
4679.49	-0.169211	-0.166146	-0.173565	0.155714	0.0544066	-0.0228348	0.677678	0.377327	0.0705769	0.170771
4690.93	-0.0593202	-0.269706	-0.103616	-0.0386972	-0.380322	-0.0159297	0.453809	0.438735	-0.0485685	0.350932
4702.38	-0.210149	-0.219115	-0.134709	-0.214431	0.263368	0.108087	0.510269	0.165054	0.0435225	0.336016
4713.84	-0.273588	-0.0763039	-0.142105	-0.0510825	0.285594	0.0346813	0.660516	0.295436	-0.0795961	0.0318096
4725.26	-0.112392	-0.187943	-0.115987	-0.118028	0.177527	0.0325813	0.509204	0.379246	-0.504258	0.121048
4736.73	-0.186606	-0.0880378	-0.0883982	-0.208407	-0.128204	0.00841404	0.632972	0.110675	0.0576023	0.235955
4748.16	-0.198855	-0.0491679	-0.227227	-0.0541339	-0.156941	0.0216218	0.778571	-0.0869704	0.279501	0.134524
4759.62	0.0140753	-0.241817	-0.183677	0.0397488	0.653154	0.198844	0.454283	-0.0559912	-0.0758873	0.0105997
4771.07	-0.0489489	-0.256239	0.0945325	-0.0471956	0.263676	0.204534	0.451204	0.248137	0.182524	-0.0871444
4782.49	0.0312166	-0.0946999	0.0308899	0.0451322	0.198253	0.250448	0.529278	0.241056	0.153195	0.0596518
4793.99	0.21551	-0.144459	0.0909853	0.141331	0.351281	0.370289	0.351404	0.426691	-0.0359604	-0.014514
4805.37	-0.0175707	-0.151542	0.205738	0.0731189	0.14431	0.241377	0.395278	0.425533	0.0303056	-0.227259
4816.88	-0.0572379	-0.155822	0.234201	0.172977	0.305729	0.182041	0.430189	0.30497	-0.104768	-0.173302
4828.29	-0.12704	-0.231303	0.149102	0.196522	0.111534	0.312751	0.351036	0.672769	-0.170805	-0.18815
4839.72	-0.181554	-0.204979	-0.0539204	0.101905	0.151096	0.332911	0.469664	0.693073	-0.169844	-0.149906
4851.25	-0.0906578	-0.310212	0.224464	0.209887	0.21334	0.262237	0.489543	0.981673	-0.163227	-0.128181
4862.55	-0.124395	-0.0944998	0.278801	0.309819	0.155064	0.270244	0.325872	0.984372	-0.136311	0.0369556
4874.19	-0.0603536	0.0293525	0.18784	0.15795	-0.0209752	0.185901	0.451961	0.779618	-0.0973842	0.19211
4885.43	-0.138824	-0.102556	0.398024	0.0390776	0.121066	0.097237	0.510928	0.99094	0.0225536	0.0218769
4897.04	-0.114772	0.085599	0.192063	-0.0430577	0.798002	0.148944	0.460705	0.0719763	0.0730039	0.0926652
4908.49	-0.0281427	-0.0067192	0.141442	0.00239312	0.61056	0.0704957	0.362863	-0.0764761	0.217503	0.0645235
4919.75	-0.089498	-0.235881	0.135929	0.026464	0.485982	-0.0166901	0.382445	0.636096	0.23748	-0.044385
4931.79	-0.071331	-0.166558	-0.061879	-0.0956535	0.612729	-0.0478343	0.593946	0.569972	0.143199	0.0837478
4942.33	-0.0919189	0.0775254	0.0253256	0.303485	-0.180572	0.0613002	-0.161524	1.14373	0.547596	-0.0034837

## Sheet: plus6grp
Time	Fly1	Fly2	Fly3	Fly4	Fly5	Fly6	Fly7	Fly8	Fly9	Fly10
9.04816	-7.30427e-06	-8.19671e-07	-5.84581e-07	-1.85426e-05	3.31222e-06	2.63303e-06	1.35201e-06	-2.69477e-06	-5.30852e-06	-9.36831e-06
20.6654	5.28275e-06	4.57247e-06	3.4105e-06	3.25046e-05	-4.42658e-06	-9.0149e-07	4.90167e-06	3.26588e-06	6.43987e-06	2.70287e-06
32.0169	-5.95333e-07	-8.31845e-06	-6.24253e-06	-4.11006e-05	4.48125e-06	-1.86472e-06	-1.20807e-05	-2.95019e-06	-5.82476e-06	7.68099e-06
43.516	-6.25712e-06	1.07637e-05	8.10719e-06	3.91244e-05	-3.01433e-06	5.14483e-06	1.80978e-05	1.48573e-06	2.94496e-06	-1.97592e-05
54.9464	1.38181e-05	-1.05217e-05	-7.95734e-06	-2.28385e-05	-1.04811e-07	-8.02323e-06	-2.03933e-05	1.10308e-06	2.15387e-06	3.00774e-05
66.3754	-1.97781e-05	6.55218e-06	5.00237e-06	-8.12407e-06	4.49197e-06	9.33993e-06	1.662e-05	-4.39412e-06	-8.64224e-06	-3.43437e-05
77.8637	2.14135e-05	1.33518e-06	9.12157e-07	4.92259e-05	-9.16529e-06	-7.98817e-06	-5.54112e-06	7.54674e-06	1.48649e-05	2.85572e-05
89.2613	-1.63525e-05	-1.20601e-05	-8.9852e-06	-9.05445e-05	1.26338e-05	3.31812e-06	-1.20797e-05	-9.41652e-06	-1.85662e-05	-1.05092e-05
100.751	3.5397e-06	2.31128e-05	1.73369e-05	0.000117945	-1.31982e-05	4.44809e-06	3.29048e-05	8.82269e-06	1.74162e-05	-1.87067e-05
112.171	1.58502e-05	-3.0821e-05	-2.32054e-05	-0.000116186	9.44992e-06	-1.39284e-05	-5.10964e-05	-4.93987e-06	-9.78296e-06	5.36909e-05
123.626	-3.78845e-05	3.11298e-05	2.353e-05	7.36818e-05	-8.77593e-07	2.25722e-05	5.92838e-05	-2.26884e-06	-4.41337e-06	-8.47979e-05
135.079	5.60747e-05	-2.08389e-05	-1.58808e-05	1.20072e-05	-1.15813e-05	-2.70506e-05	-5.04624e-05	1.17096e-05	2.30242e-05	9.96858e-05
146.511	-6.25446e-05	-9.37055e-07	-4.39872e-07	-0.000129519	2.52578e-05	2.40784e-05	2.0561e-05	-2.10619e-05	-4.14814e-05	-8.64421e-05
157.976	5.01636e-05	3.14956e-05	2.3433e-05	0.000251753	-3.59476e-05	-1.15647e-05	2.89288e-05	2.70659e-05	5.33596e-05	3.78685e-05
169.408	-1.53169e-05	-6.39766e-05	-4.79642e-05	-0.000338435	3.8718e-05	-1.0167e-05	-8.91406e-05	-2.62524e-05	-5.18141e-05	4.40664e-05
180.864	-3.93791e-05	8.79881e-05	6.62217e-05	0.000344294	-2.93031e-05	3.74809e-05	0.000143805	1.6051e-05	3.17644e-05	-0.000145073
192.307	0.000103372	-9.17109e-05	-6.92891e-05	-0.000232767	5.85254e-06	-6.32962e-05	-0.000171763	3.94867e-06	7.61756e-06	0.000238311
203.753	-0.000158494	6.53773e-05	4.97561e-05	-6.82421e-06	2.94213e-05	7.80887e-05	0.000152213	-3.09516e-05	-6.08425e-05	-0.000288395
215.204	0.000182034	-5.50014e-06	-4.9046e-06	0.000343495	-6.93059e-05	-7.21521e-05	-7.20278e-05	5.8579e-05	0.000115352	0.000260017
226.645	-0.000152675	-8.12965e-05	-6.03903e-05	-0.000697983	0.000101983	3.88692e-05	-6.6507e-05	-7.75664e-05	-0.00015289	-0.000130158
238.098	5.84235e-05	0.000176338	0.000132163	0.000952798	-0.000113171	2.17177e-05	0.000240041	7.775e-05	0.000153417	-9.88404e-05
249.541	9.53574e-05	-0.00025032	-0.000188377	-0.000981034	9.00207e-05	-0.000100143	-0.0004034	-5.12004e-05	-0.000101278	0.000389483
260.989	-0.000280547	0.000268984	0.000203155	0.000695077	-2.61499e-05	0.000176848	0.000496029	-4.09808e-06	-7.54889e-06	-0.000667374
272.436	0.000446466	-0.000202863	-0.000154116	-9.34735e-05	-7.34395e-05	-0.000224706	-0.000456437	8.10719e-05	0.000159215	0.00083147
283.882	-0.000527922	3.9351e-05	3.15428e-05	-0.000736774	0.000189315	0.000215187	0.000242993	-0.000162214	-0.000319338	-0.000777766
295.331	0.000461604	0.000206045	0.000153033	0.00169494	-0.000288301	-0.000127551	0.00014343	0.000221312	0.000436347	0.000433804
306.776	-0.000208593	-0.000483411	-0.000362027	-0.00270779	0.000329242	-4.07841e-05	-0.000641996	-0.000228916	-0.000452111	0.000203385
318.224	-0.000222143	0.000711058	0.000533929	0.00330724	-0.000273925	0.000265721	0.00112781	0.000161126	0.000319109	-0.00103738
329.67	0.000756863	-0.000789702	-0.000594356	-0.00307148	0.000101468	-0.000493437	-0.00142814	-9.94862e-06	-2.09018e-05	0.00186382
341.117	-0.00125513	0.0006283	0.000475753	0.00165902	0.000177482	0.000646206	0.00136184	-0.000207749	-0.000409691	-0.0023948
352.564	0.00152961	-0.000178814	-0.000142836	0.00165482	-0.000511775	-0.000639019	-0.00079823	0.000446046	0.000881329	0.00232171
364.011	-0.00139022	-0.000526385	-0.000381448	-0.00833777	0.000810994	0.000406475	-0.00027647	-0.000632882	-0.00124943	-0.00141236
375.458	0.000709352	0.00134625	0.000997526	0.0255332	-0.000959141	6.43517e-05	0.00170549	0.000681926	0.00134077	-0.000373095
386.905	0.000504952	-0.00203164	-0.00152764	-0.000927419	0.000840987	-0.000706158	-0.00314412	-0.000513566	-0.0010001	0.00277956
398.352	-0.00205072	0.0022742	0.00174368	-0.0236602	-0.00037926	0.00136321	0.00409955	8.75712e-05	0.000157802	-0.00521585
409.799	0.00352216	-0.00180209	-0.00142726	0.00649747	-0.000418469	-0.00181665	-0.00403699	0.00056136	0.00110146	0.00683217
421.245	-0.00436963	0.000526724	0.000458638	-9.32636e-05	0.00141997	0.00183629	0.00255183	-0.00130189	-0.00250444	-0.00673048
432.692	0.00403454	0.001325	0.00103988	-0.00252569	-0.00237095	-0.00125347	0.000412231	0.00185673	0.00355194	0.00426011
444.139	-0.00222241	-0.00322448	-0.0027056	0.00272805	0.00285434	9.14336e-05	-0.00445926	-0.00191575	-0.00368258	0.000524235
455.586	-0.000956673	0.00473825	0.00394789	-0.00112511	-0.00241594	0.0015336	0.00867777	0.00119591	0.00254403	-0.00675391
467.033	0.00491077	-0.00609508	-0.00444594	-0.00233143	0.000782714	-0.00342561	-0.0117381	3.98877e-05	-0.000502384	0.0129869
478.48	-0.00907415	0.00648332	0.00418994	0.00571958	0.00150827	0.00552694	0.0119303	-0.00100297	-0.00159212	-0.0183507
489.927	0.012865	-0.00531706	-0.00155796	-0.00734576	-0.00294988	-0.00693206	-0.00757245	0.00339811	0.00596764	0.0223157
501.374	-0.0121024	0.00170188	0.00137647	0.00859203	0.00642506	0.00392687	0.00151201	-0.00183995	-0.00737158	-0.0163979
512.821	0.0115653	0.00456832	0.00440073	-0.0035914	-0.00574959	-0.00338704	0.010721	0.00509346	0.00974216	0.00793648
524.267	-0.00258958	-0.0165803	-0.00679706	-0.00338789	0.00437443	-0.00645362	-0.0256656	-0.00138427	-0.0105554	0.0129024
535.714	-0.00840442	0.092483	0.0215043	0.0802511	0.000427317	0.0150297	0.0404903	0.00415145	0.0156079	-0.0392091
547.161	0.0362615	-0.0178411	-0.103644	0.00432868	-0.00412905	-0.0375295	-0.0481281	-0.104759	-0.107781	0.0860188
558.608	-0.180004	-0.0753156	-0.202903	-0.148791	-0.15968	0.0903641	-0.0971734	-0.266913	-0.310132	-0.348281
570.055	-0.27469	0.128909	-0.36039	-0.245714	-0.344669	0.396781	-0.280409	-0.365677	-0.169519	-0.576162
581.502	-0.378482	-0.0247856	-0.576689	-0.306992	-0.170042	0.588693	-0.233412	-0.624289	-0.134639	-0.327867
592.949	-0.41122	-0.171196	-0.388404	-0.430575	-0.0879608	0.538064	0.225032	-0.560953	-0.079115	-0.339848
604.396	-0.270774	-0.207796	-0.475874	-0.333644	-0.0944371	0.458862	-0.0128575	-0.275389	-0.208379	-0.30804
615.842	-0.505693	-0.425619	-0.570413	-0.0218446	-0.236502	0.491911	-0.187496	-0.313463	-0.642596	-0.377607
627.289	-0.528328	-0.576594	-0.350135	-0.241161	-0.321273	0.422798	-0.16453	-0.241246	-0.447034	-0.202683
638.736	-0.535193	-0.764371	-0.590872	-0.26078	0.0591576	0.333966	-0.278902	-0.157003	-0.516305	-0.261264
650.183	-0.688367	-0.96263	-0.613507	0.0423845	-0.180948	0.354986	-0.316326	-0.157009	-0.849271	-0.250808
661.63	-0.604875	-0.893708	-0.527849	0.00556016	-0.276474	0.406792	-0.341552	-0.0630413	-0.772166	0.179728
673.077	-0.724939	-0.564051	-0.510491	0.154142	0.263704	0.179703	0.0811767	-0.0237419	-0.949253	-0.134811
684.524	-0.603872	-0.265744	-0.259692	0.0618023	0.361109	0.25716	0.209248	-0.295401	-0.80882	-0.291223
695.971	-0.320235	-0.108399	-0.43102	0.116566	0.330354	0.332022	-0.00409862	-0.186973	-0.646315	-0.188608
707.418	-0.485765	-0.140416	-0.417566	0.48341	0.214688	-0.0805649	0.188192	0.491534	-0.884894	-0.174978
718.864	-0.450617	-0.0745878	-0.371825	0.239923	0.227515	0.0783599	0.376526	0.557542	-0.986901	0.155245
730.311	-0.219488	0.206535	-0.574934	0.334492	0.371622	-0.119597	0.34523	0.42396	-1.049	0.117073
741.758	-0.050936	0.0785306	-0.282369	0.376506	0.36511	-0.214325	0.570593	0.333491	-0.786006	0.091241
753.205	0.199288	-0.072443	-0.317658	0.230835	0.388702	0.251287	0.585789	0.461862	-0.54713	0.233199
764.652	0.253784	0.0641334	-0.497301	0.57888	0.412115	-0.237821	0.359181	0.67191	-0.68766	0.244014
776.099	0.481876	0.0454108	-0.331815	0.496981	0.46915	-0.574236	0.74417	0.511223	-0.670652	0.206832
787.546	0.809426	-0.0467773	-0.349943	0.489807	0.30832	-0.453059	0.916335	0.867248	-0.670299	0.0756839
798.993	0.822516	-0.133079	-0.428462	0.447513	0.371899	-0.15064	0.857239	0.777838	-0.565172	0.339178
810.44	0.974032	-0.245277	-0.480092	0.242576	0.444269	-0.0173489	1.13386	0.602777	-0.377327	0.563473
821.886	1.23128	-0.245209	-0.413163	0.352051	0.193827	-0.449615	1.09439	0.986384	-0.420335	0.497259
833.333	1.2772	-0.163885	-0.393019	0.217218	0.287192	-0.289509	0.948151	0.678291	-0.261659	0.592001
844.78	1.32479	-0.137391	-0.320646	0.17381	0.253553	-0.270701	0.985143	0.734703	-0.0352084	0.531044
856.227	1.49004	-0.0129807	-0.0301174	0.117675	0.0139247	-0.403199	1.13651	0.869206	0.0843115	0.451066
867.674	1.33276	-0.0802482	0.0349066	0.126025	0.0508098	0.177307	1.45598	0.518069	-0.0632388	0.354763
879.121	1.23674	-0.131472	-0.161964	0.286755	0.06321	0.0304761	1.27428	0.616666	0.0798414	0.343882
890.568	1.3682	0.135554	-0.0779076	0.171155	-0.124546	-0.437389	0.97929	0.645951	0.362179	0.387831
902.015	1.15705	0.0260068	0.0624104	-0.0986698	-0.252234	-0.174338	1.38602	0.700093	0.0237995	0.392354
913.462	1.18938	0.123158	-0.161614	-0.360088	-0.40699	0.487845	1.56456	0.896804	0.0513565	0.579286
924.908	1.37663	0.39253	-0.183722	-0.409253	-0.390162	0.660777	1.3002	0.5561	0.298249	0.499677
936.355	1.28696	0.152427	-0.271609	-0.595404	-0.0862564	0.297441	1.19433	0.655797	0.551629	0.555748
947.802	1.34106	0.0687555	-0.475082	-0.593026	0.012267	0.467995	1.20602	1.03503	0.663684	0.571029
959.249	1.33508	0.0946378	-0.312785	-0.349772	0.0692367	0.413798	1.144	0.686719	0.453167	0.333139
970.696	1.26576	0.0148179	-0.214552	-0.53567	0.372791	0.274476	1.06641	0.737307	0.634805	0.401375
982.143	1.1867	-0.0742096	-0.306187	-0.427155	0.515104	0.499128	0.966089	0.799763	0.748221	0.291747
993.59	1.10386	0.0120739	-0.439487	-0.305784	0.197179	0.600212	0.920894	0.705488	0.534576	0.13204
1005.04	1.32101	0.141219	-0.312939	-0.661847	0.0549431	0.745347	1.01916	1.08578	0.432497	0.142976
1016.48	1.2031	0.127745	-0.0531193	-0.661059	0.330632	0.753809	0.877972	1.15486	0.415288	0.249227
1027.93	0.86138	0.24562	0.0342514	-0.728097	0.295709	0.795237	0.871051	1.19981	0.321577	0.302218
1039.38	0.907993	0.225331	0.200276	-0.813253	0.174827	0.777418	1.02188	1.31929	0.382937	-0.0401595
1050.82	0.967068	0.151127	0.324571	-0.61218	0.228052	0.581931	0.994665	1.36853	0.326499	-0.0543658
1062.27	0.898206	0.0485525	0.421999	-0.607612	-0.0542527	0.537597	1.01615	1.35825	0.22253	0.248526
1073.72	0.934139	0.0793663	0.501773	-0.466608	-0.161344	0.65348	1.06946	1.49626	0.392319	0.27436
1085.16	0.835711	0.229855	0.477232	-0.437562	-0.16861	0.381201	1.34549	1.61355	0.191585	0.28856
1096.61	0.447269	-0.0478959	0.461887	-0.527749	-0.360493	-0.0337181	1.52178	1.33464	0.332062	0.15421
1108.06	0.323193	-0.0441989	0.168338	-0.407031	-0.351755	0.370977	1.41245	1.60793	0.645411	0.0427718
1119.51	0.401414	0.173033	-0.0618713	-0.229902	-0.445806	0.410005	1.49051	1.27821	0.462747	0.218448
1130.95	0.301506	-0.0650772	-0.149323	-0.0942375	-0.478471	0.228547	1.72332	0.664825	0.564417	0.0940363
1142.4	0.16128	0.0671678	-0.084711	-0.292667	-0.597063	0.497783	1.76296	0.992143	0.344054	-0.0745106
1153.85	0.128917	0.232906	0.177862	-0.165177	-0.667108	0.320041	1.66719	1.02077	0.180073	-0.0568057
1165.29	0.238149	-0.0213162	0.0754135	-0.0671166	-0.55524	0.331091	1.81335	0.713994	0.33474	-0.175605
1176.74	0.402671	0.209537	0.0123668	-0.291113	-0.679086	0.521255	1.7653	0.73264	0.198936	-0.153537
1188.19	0.471201	0.246174	-0.172871	-0.0921412	-0.456563	0.44858	1.57882	1.64698	0.336817	-0.0740088
1199.63	0.311707	0.131313	-0.203516	0.140536	-0.378565	0.5331	1.59097	2.01759	0.382193	0.0364191
1211.08	0.367552	0.30132	-0.254788	0.423814	-0.467167	0.608327	1.64599	1.82224	0.226968	0.245034
1222.53	0.514699	0.138886	-0.544946	0.307316	-0.2412	0.514757	1.54341	1.6892	0.233917	0.280293
1233.97	0.331014	0.118552	-0.0125359	0.146746	-0.0635388	0.388128	1.01526	1.30278	0.0781483	0.2765
1245.42	0.419819	0.177414	0.152786	0.255875	0.18046	0.298239	0.985785	1.77635	0.0563311	0.284236
1256.87	0.50261	0.29322	-0.0149951	0.181993	0.345512	0.086866	1.60972	2.2414	0.0785255	0.375691
1268.31	0.408923	0.450766	0.112212	0.506857	0.45398	-0.0634213	1.93391	2.15284	-0.131622	0.444669
1279.76	0.525483	0.327493	-0.0496824	0.250153	0.531809	0.0467849	1.31358	2.18943	-0.129898	0.353135
1291.21	0.492335	0.2552	-0.0956936	-0.195851	0.580836	-0.0322009	1.04901	2.22771	-0.177506	0.429934
1302.66	0.629117	0.072873	-0.112863	-0.03427	0.510325	-0.211125	1.72502	2.39769	-0.230257	0.397424
1314.1	0.822255	0.0136694	0.0733253	-0.155859	0.397235	-0.167904	1.78778	2.54567	-0.111421	0.253827
1325.55	0.692352	0.128195	0.268942	-0.371888	0.449887	-0.283419	1.76051	2.5011	-0.181854	0.317067
1337	0.837264	0.0545969	0.411822	-0.511833	0.373522	-0.163385	1.80401	2.61505	-0.183907	0.264394
1348.44	0.997594	0.0703264	0.531719	-0.479673	0.325526	0.0747087	1.71921	2.71234	-0.0710996	0.08817
1359.89	0.849862	0.181842	0.306103	-0.433081	0.221826	-0.191641	1.74724	2.72715	-0.0875093	0.0904785
1371.34	0.914718	0.147069	0.362281	-0.353604	0.134058	-0.14818	1.52633	2.72814	-0.14786	0.14014
1382.78	0.941643	-0.0211969	0.405613	-0.316076	0.127707	0.05048	1.51084	2.50464	-0.0482965	0.0370611
1394.23	0.921983	-0.019179	0.362068	-0.405927	-0.0561188	-0.022755	1.64659	2.71397	0.0324716	-0.0386109
1405.68	1.1217	0.0733351	0.400655	-0.35959	-0.0452237	0.00965717	1.49603	2.89068	-0.108476	-0.00330752
1417.12	1.10632	-0.0290018	0.212389	-0.436553	-0.0910006	0.000285871	1.48055	2.70604	-0.0699352	0.0231649
1428.57	1.02925	-0.0417855	0.231492	-0.230181	-0.248965	-0.00546536	1.60991	2.78883	0.0279168	0.000780652
1440.02	1.16817	0.0840879	0.343586	-0.182288	-0.313039	0.00822132	1.52222	2.88924	-0.00644187	-0.0048249
1451.47	1.22185	0.086008	0.267591	-0.31524	-0.324081	-0.00741385	1.61495	2.8666	-0.0398785	0.00742056
1462.91	1.10713	-0.00955986	0.261006	-0.203952	-0.269048	0.00589806	1.89552	2.50167	-0.063562	-0.0176778
1474.36	1.18847	0.0146692	0.19544	-0.2588	-0.422197	-0.00349012	1.85238	2.45546	0.0148139	-0.0710148
1485.81	1.29758	0.0704482	0.161393	-0.0803773	-0.589987	0.00057982	1.77567	2.60482	0.00294855	-0.0719132
1497.25	1.33797	-0.148131	0.15116	-0.0103795	-0.547489	0.0018293	1.8175	2.39379	-0.021172	-0.0243253
1508.7	1.34816	-0.188189	0.2072	0.0924049	-0.619067	-0.00292096	1.81451	2.41925	0.138029	-0.00703781
1520.15	1.22812	0.109564	0.269158	0.299714	-0.61483	0.00243518	1.70138	2.24967	0.117149	0.0574885
1531.59	1.32917	0.0658514	0.0961093	0.053169	-0.272282	-0.000714411	1.37492	2.1667	-0.0248775	0.0502687
1543.04	1.32624	-0.0646226	-0.0715703	0.182667	-0.198375	-0.00147833	1.14972	2.03372	0.0135758	-0.0123382
1554.49	1.60958	0.00795289	-0.423295	0.428219	-0.249266	0.00328546	1.19367	1.6584	-0.00724831	0.0101186
1565.93	1.731	0.18619	-0.00833548	0.283212	-0.367952	-0.00411167	1.52427	2.05076	-0.0804269	-0.0333838
1577.38	1.48886	0.469687	0.499836	0.27428	-0.626616	0.00378057	2.11494	2.25677	-0.0112823	-0.0971844
1588.83	1.71146	0.427422	0.317841	0.218192	-0.703269	-0.00188962	2.25933	2.31809	0.00921578	-0.0887253
1600.27	1.11669	0.567684	0.807675	0.137917	-0.732443	-0.00324773	2.04145	2.43347	-0.0105043	-0.0448242
1611.72	0.953116	0.817146	0.614139	0.348133	-0.680399	0.0089111	2.12818	2.31265	0.0133073	-0.0514055
1623.17	1.64696	0.822481	0.348441	0.475345	-0.835741	-0.0159873	2.23611	2.46144	-0.0217509	-0.048184
1634.62	1.63128	0.848531	0.624721	0.532502	-0.566007	0.0223343	1.98534	2.03539	-0.00951047	-0.0188475
1646.06	1.63987	0.676571	0.55415	0.887331	-0.311985	-0.0252298	1.89459	1.93011	0.0269669	0.0832213
1657.51	1.94212	0.719896	0.919351	1.08651	-0.521677	0.0160186	2.15451	2.05087	-0.003373	0.228772
1668.96	1.77051	0.68873	0.680162	1.27642	-0.250306	0.216158	2.10185	1.7296	-0.0110391	0.342671
1680.4	1.00004	0.649131	0.635192	1.22524	-0.215904	0.0786916	2.10325	1.48352	0.0226653	0.490682
1691.85	0.823634	0.801483	0.854526	0.757301	0.0156181	-0.0507516	2.13401	0.74321	0.0601604	0.391881
1703.3	1.23326	0.974358	0.460056	0.980133	0.404561	0.0356563	1.63593	0.770787	0.0833692	0.45633
1714.74	1.82252	1.11915	0.577782	1.15979	0.237942	-0.0172213	1.6505	1.49848	0.201933	0.675292
1726.19	2.08019	0.716393	0.444786	1.21112	0.170602	0.0054105	2.14047	1.15139	0.350957	0.682884
1737.64	1.72608	0.628444	0.137648	1.16093	0.117129	0.00701168	1.95432	-0.060391	0.438902	0.703145
1749.08	1.70044	0.7557	0.141089	0.663377	0.0735857	-0.398582	1.72339	-0.505651	0.611947	0.541411
1760.53	1.68491	0.601662	-0.105516	0.656442	0.113343	-0.442211	1.7781	-0.0353002	0.604324	0.58851
1771.98	1.45011	0.814854	-0.308209	0.413316	0.182861	-0.248718	1.49025	0.637931	0.512173	0.626779
1783.42	1.37539	0.973006	-0.447727	0.33877	0.431484	-0.474626	1.35897	0.767557	0.661053	0.477072
1794.87	1.22714	0.64907	-0.748993	0.393901	0.484097	-0.500137	1.42614	0.45142	0.737126	0.467772
1806.32	1.04689	0.388347	-0.819537	0.0899269	0.412103	-0.463694	1.19749	0.732179	0.816011	0.37739
1817.77	1.00015	0.790251	-0.585	0.00599613	0.793801	-0.400277	1.03086	0.885681	0.958916	0.254469
1829.21	0.698355	1.17644	-0.355461	-0.337954	1.00535	-0.654504	0.964373	0.862774	0.923502	0.127736
1840.66	0.53965	0.992973	-0.169358	-0.410372	0.922091	-0.933149	0.94863	0.608999	0.747685	0.224498
1852.11	0.619916	1.08234	-0.199832	-0.68122	1.11512	-0.642763	0.881996	0.145544	0.970587	0.334358
1863.55	0.528382	1.3303	-0.399365	-0.684006	1.57836	-0.987318	0.753306	0.303397	1.03688	0.33258
1875	0.463398	1.11323	-0.660187	-0.299	1.6257	-1.015	0.746843	0.920447	0.30788	0.266168
1886.45	0.449158	0.986785	-0.497614	-0.513941	1.62424	-0.842872	0.675928	0.739429	-0.122774	0.200677
1897.89	0.509721	1.01382	-0.19417	-0.279183	2.37344	-0.986919	0.503409	0.2437	-0.33608	0.277495
1909.34	0.517445	0.979821	-0.19218	-0.238412	1.98518	-0.652221	0.500745	0.548412	-0.396211	0.383259
1920.79	0.577254	1.14318	-0.124176	-0.130923	1.73483	-0.848721	0.565733	0.547324	-0.314685	0.38356
1932.23	0.5915	1.14167	-0.0730672	0.127422	2.34452	-0.795236	0.457381	0.604019	-0.42559	0.302546
1943.68	0.895128	0.94858	0.0296388	0.00315317	1.99213	-0.767205	0.364604	0.701424	-0.100447	0.582271
1955.13	1.29316	0.954365	0.00732739	0.345375	2.36198	-1.28686	0.328296	0.56823	-0.0383837	0.635217
1966.58	1.33112	1.03948	0.256457	0.24707	2.60823	-0.997508	0.356441	0.679941	-0.435664	0.42202
1978.02	1.58714	1.19055	0.442081	-0.0200409	2.5009	-0.631886	0.427023	0.650547	-0.620979	0.464954
1989.47	1.52262	1.20322	0.337194	0.154398	2.73761	-0.0983397	0.399735	0.683164	-0.436632	0.385
2000.92	1.4129	1.29273	0.515311	0.15126	2.41824	0.419247	0.274666	0.76272	-0.172155	0.407574
2012.36	1.57037	1.37524	0.656256	0.156475	2.29163	0.175022	0.221597	0.722732	-0.15966	0.521453
2023.81	1.52253	1.12469	0.911406	0.397674	2.35644	0.228709	0.30327	0.751389	-0.158263	0.669527
2035.26	1.55313	1.19593	0.72861	0.386999	2.4141	0.300717	0.236539	0.857859	-0.338372	0.752073
2046.7	1.44072	1.24887	0.664724	0.117509	2.12933	0.031682	0.363838	0.569727	-0.0330757	0.774231
2058.15	1.36813	1.26241	0.858761	0.238406	1.82372	0.335747	0.668943	0.557857	-0.0818766	0.899049
2069.6	1.30743	1.23278	0.593153	0.0298555	1.67625	0.640587	0.743922	0.819328	-0.382607	0.685679
2081.04	1.09551	0.752185	0.679281	-0.266944	1.46041	0.485678	0.524843	0.529218	0.311218	0.644244
2092.49	1.15456	0.725354	0.751266	-0.637442	1.28633	0.565317	0.293224	0.594752	0.341682	0.903935
2103.94	1.0641	0.503088	0.70397	-0.698923	0.922145	0.51344	0.385589	0.546175	0.209847	0.629925
2115.38	0.743234	0.384207	0.785444	0.199215	0.750317	0.31806	0.313872	0.368344	0.43787	0.667396
2126.83	0.7479	0.867188	0.756849	0.280496	0.527072	0.0775846	0.433327	0.552958	0.448004	0.908212
2138.28	0.709387	0.471368	0.480363	0.484568	0.413244	-0.120458	0.322532	0.394797	0.475909	0.410251
2149.73	0.287241	0.230362	0.399504	0.84625	0.271722	-0.00150441	0.0565563	0.297821	0.225475	0.399491
2161.17	-0.059039	0.523769	0.374152	0.177891	-0.0655371	-0.0876742	0.157967	0.292684	-0.00312269	0.109227
2172.62	-0.0295762	0.424674	-0.0373817	0.204632	-0.0239923	-0.16343	-0.363672	0.229906	-0.31042	-0.320617
2184.07	-0.127619	0.219699	0.132106	0.432383	-0.291749	-0.161046	-0.160785	0.103269	-0.547003	0.338102
2195.51	-0.367689	0.160104	0.240669	0.189255	-0.575591	0.148609	0.557302	0.0190752	-0.420148	0.404773
2206.96	-0.270897	0.153797	0.148832	0.236253	-0.680563	0.424688	0.168703	0.12366	-0.301746	0.291776
2218.41	-0.468054	-0.0174379	0.22607	-0.0274386	-0.85518	-0.218538	-0.0315115	0.0305871	-0.212947	0.393294
2229.85	-0.63426	0.131357	0.116703	-0.206551	-0.767761	-0.791565	0.355829	-0.133645	0.00232651	0.298562
2241.3	-0.290885	0.130575	0.395788	-0.25353	-0.884534	-0.909464	0.376058	-0.165314	-0.00234015	0.333673
2252.75	-0.404403	0.00162576	0.0981285	-0.350505	-0.972975	-1.01929	0.118395	-0.00254814	-0.132079	0.316319
2264.19	-0.429803	0.0825728	-0.122187	-0.461267	-0.865056	-1.17743	0.171275	0.092718	-0.0173785	0.417095
2275.64	-0.0762267	-0.093341	0.0103704	-1.00882	-0.942341	-1.0183	0.299789	0.0980606	0.124236	0.392129
2287.09	-0.052119	0.0889455	-0.260318	-0.656497	-1.02262	-0.831694	0.288699	0.149631	0.424488	0.451542
2298.53	-0.0348991	0.0722428	-0.0522027	-0.538584	-0.899963	-0.968363	0.358296	0.162792	0.505125	0.525997
2309.98	0.115172	-0.0315991	-0.177382	-1.4966	-0.891577	-0.727109	0.409338	0.207852	0.678854	0.591328
2321.43	0.231322	0.202192	-0.243013	-1.27647	-0.768698	-0.696903	0.451256	0.163596	1.12997	0.774992
2332.88	0.173434	0.00637337	-0.0479303	-0.980145	-0.348639	-0.715444	0.419097	0.418618	0.833971	0.604044
2344.32	0.40461	0.107774	-0.153987	-0.96328	-0.68442	-0.43916	0.33005	0.337497	0.900012	0.504193
2355.77	0.64765	0.44252	-0.149207	-0.404201	-0.579215	-0.626032	0.365765	0.150873	1.14812	0.743396
2367.22	0.518025	0.354187	-0.383866	-0.172579	0.10305	-0.653288	0.382827	0.47554	1.03319	1.31852
2378.66	0.549487	0.151209	-0.293563	-0.141029	0.0762157	-0.496051	0.738978	0.448129	1.3311	1.4957
2390.11	0.434527	0.0562528	-0.0693815	-0.2661	0.389409	-0.476145	1.04957	0.641362	0.597795	1.30074
2401.56	0.594454	0.266188	-0.242636	-0.0961782	0.522193	-0.137838	0.709867	0.689393	0.568034	1.50755
2413	0.526248	0.354356	-0.310304	0.168739	0.566465	-0.111593	0.746598	0.867311	1.58274	1.53422
2424.45	0.196132	0.0950307	-0.259154	0.0304824	0.823378	-0.157443	1.00862	1.26481	1.27235	1.50446
2435.9	0.327963	0.0218084	-0.229169	0.0961487	0.622571	0.0878468	0.837409	0.983179	1.42828	1.6067
2447.34	-0.132841	-0.071722	-0.195852	0.141782	0.674438	-0.123586	1.10635	1.17745	1.4684	1.48007
2458.79	-0.0635232	-0.126645	-0.221143	0.185508	0.526559	-0.00215705	1.42912	1.42748	0.998329	1.33809
2470.24	0.512634	-0.00735987	-0.0803589	0.121588	0.413677	0.173024	1.01838	1.26073	1.38251	1.17699
2481.68	0.466769	-0.144548	0.0134988	-0.0128874	0.536104	-0.0547192	0.868052	1.38014	0.94031	0.976957
2493.13	0.503464	-0.31392	-0.256299	0.166364	0.50609	0.00470025	0.961734	1.67374	0.212814	0.851611
2504.58	0.577698	-0.315909	-0.106305	0.123731	0.689563	-0.221084	0.810695	1.54473	0.164461	0.628254
2516.03	0.872329	-0.437668	0.103798	0.12521	0.506854	-0.311583	1.00529	1.29945	0.231792	0.404512
2527.47	0.675657	-0.498635	0.215937	0.256158	0.698766	-0.186084	1.16405	1.53281	0.420863	0.466293
2538.92	0.583794	-0.674125	0.109883	0.00588124	0.88113	-0.350595	0.945736	1.6116	0.272406	0.618959
2550.37	0.960818	-1.00814	-0.239079	-0.602645	0.622744	-0.0793793	1.03292	1.57123	0.34716	0.414764
2561.81	0.660369	-0.918762	0.192179	-1.11838	1.04202	-0.105013	1.06427	1.48688	0.41717	0.459469
2573.26	0.963716	-0.797617	0.184718	-0.71699	0.89468	-0.470747	0.637071	1.5462	0.20205	0.753734
2584.71	0.96004	-0.618884	0.00324742	-0.302461	0.50562	-0.423946	0.612174	1.51347	0.266779	0.526704
2596.15	0.515719	-0.702701	0.265907	-0.572912	0.658222	-0.413447	0.871304	1.23486	0.189502	0.418618
2607.6	0.665533	-0.959122	0.0049913	-0.752953	0.503242	-0.4167	0.878626	1.53361	0.0770088	0.385965
2619.05	0.344173	-0.815873	0.298254	-0.647328	0.47783	-0.618658	0.732589	1.59385	-0.0553583	0.248257
2630.49	0.496788	-0.940407	0.34779	-0.347909	0.490924	-0.540498	0.415027	1.53309	0.00256704	0.292707
2641.94	0.47751	-0.773205	-0.0457456	-0.398575	0.218758	-0.18773	0.379843	1.53075	0.06073	-0.0455525
2653.39	-0.0294473	-0.630498	0.162894	-0.430962	0.312199	-0.381217	0.43632	1.33864	-0.190623	-0.291031
2664.84	0.358982	-0.795004	0.0183387	-0.320236	0.350778	-0.0277375	0.498821	1.27472	-0.0335556	0.239466
2676.28	0.125267	-0.689947	0.0629482	-0.423401	0.154234	0.110529	0.725722	0.8399	-0.100017	0.46593
2687.73	0.203282	-1.15651	0.256273	0.0705956	0.0976557	-0.332736	0.628088	1.15075	-0.140949	0.248326
2699.18	0.677838	-1.37097	0.109557	0.223399	-0.115511	0.00260858	0.661776	1.47585	0.124646	-0.0272971
2710.62	-0.0587085	-1.0532	0.423832	0.173774	-0.320784	-0.0126239	0.810019	1.12907	-0.123339	-0.255234
2722.07	-0.462694	-1.22254	0.470792	0.575288	-0.2292	-0.133104	0.719014	1.4161	-0.339658	-0.151343
2733.52	-0.708482	-1.15912	0.26609	0.430224	0.0645428	0.10275	0.561758	1.50423	-0.168122	-0.189665
2744.96	-0.841005	-1.05223	0.33893	0.311393	-0.305191	0.0397283	0.638017	1.68907	0.161371	-0.481702
2756.41	-0.873358	-1.30071	0.228077	0.285081	-0.740109	0.0175031	1.07823	1.61806	0.01384	-0.973697
2767.86	-1.16379	-1.24559	0.085527	0.266549	-0.573846	0.0862666	1.13394	1.38446	-0.457516	-1.08614
2779.3	-0.88677	-1.15487	-0.0597467	0.576455	-0.630851	0.0852356	1.06734	1.53356	-0.377002	-1.19724
2790.75	-0.841645	-1.19332	0.0132955	0.539311	-0.537799	-0.0496993	1.1413	1.28938	-0.250524	-1.25568
2802.2	-1.09375	-1.16784	0.312169	0.14508	-0.577476	0.0244596	0.979011	1.55267	-0.125787	-0.566122
2813.64	-0.940575	-1.25524	0.375953	0.035761	-0.666444	0.0269114	0.940653	1.47657	0.512939	-0.626373
2825.09	-0.927858	-1.19993	0.32008	0.185348	-0.343494	-0.228516	0.564464	1.35118	0.738859	-0.670331
2836.54	-0.923188	-1.05503	0.34716	0.319218	-0.405761	-0.364982	0.338539	1.47313	0.679126	-0.236425
2847.99	-0.691081	-1.01531	0.43689	0.509651	-0.456342	-0.302494	0.699912	1.1055	0.76935	-0.544613
2859.43	-0.779908	-0.8074	0.34739	0.495444	-0.258359	0.155169	0.628892	1.1316	0.47986	-0.216831
2870.88	-0.592091	-0.91832	0.19149	0.428477	-0.105463	-0.0267291	0.581902	1.01256	0.433909	0.567349
2882.33	-0.379833	-1.1516	0.22245	0.394707	-0.262308	-0.561241	0.679163	0.892841	0.238548	0.858182
2893.77	-0.552931	-0.775313	0.0911398	0.0697792	-0.33323	-0.618084	0.727298	0.648204	-0.148505	0.912576
2905.22	-0.18338	-0.648949	-0.069278	-0.0173091	-0.00334394	-0.700466	0.798358	0.77877	0.107487	0.82119
2916.67	0.0386951	-0.784799	-0.0566608	0.0256185	-0.162174	-0.861084	0.272251	0.973737	0.197266	0.946442
2928.11	0.0674815	-0.56913	0.065985	0.0400559	-0.190704	-1.01892	0.413264	0.354901	0.0571598	0.628366
2939.56	0.270813	-0.462433	0.181776	0.177399	0.0504219	-1.04913	0.991029	0.257707	-0.150938	0.351243
2951.01	0.223669	-0.575685	0.220787	0.247596	-0.283298	-1.18707	0.959318	0.23675	-0.105476	0.622466
2962.45	0.211553	-0.329637	0.330656	0.0307416	-0.412158	-0.925696	1.01299	0.313682	0.285	0.403225
2973.9	0.158503	-0.118631	0.29853	-0.160173	-0.0914103	-0.870843	0.958608	0.30806	-0.249896	0.462894
2985.35	0.288068	-0.266144	0.210684	-0.029541	0.212564	-1.26825	0.815553	0.0468915	-0.73535	0.764582
2996.79	0.391359	0.0401609	0.00267806	-0.0632195	0.536456	-0.935909	0.829705	0.289785	-0.351777	0.909357
3008.24	0.39351	0.157019	-0.0644193	0.00945729	0.468535	-1.2153	1.16306	0.569488	-0.271814	1.06301
3019.69	0.550564	-0.140342	0.209912	0.0469277	0.240083	-1.3599	0.931842	0.603679	-0.297982	0.812938
3031.14	0.463875	0.0516811	-0.24709	0.0319485	0.46546	-0.844006	0.795131	0.299823	-0.0579536	0.973777
3042.58	0.673147	0.139721	-0.637172	0.302988	0.412024	-1.11859	1.13381	0.188475	-0.242488	1.02088
3054.03	0.78304	-0.0730726	-0.153766	0.273585	0.222632	-0.814105	0.769283	0.375721	-0.354932	1.1969
3065.48	0.430661	0.216943	-0.0499554	0.358574	0.407126	-0.690692	0.87087	0.57049	0.0697519	1.264
3076.92	0.495642	0.612763	-0.205247	0.737972	0.520547	-0.936734	0.769086	0.511301	0.0819373	0.594708
3088.37	0.611825	0.548622	-0.21932	0.767685	0.471763	-0.41244	0.625203	0.337484	-0.0743642	1.0046
3099.82	0.71618	0.700096	-0.312155	0.680975	0.304223	-0.380502	0.950633	0.732908	0.0949272	0.90381
3111.26	0.653908	0.917015	-0.545716	0.748303	0.611351	-0.329504	0.47202	0.797603	0.0440878	0.539593
3122.71	0.480175	0.815308	-0.738336	0.766323	0.781028	0.113922	0.488502	0.690935	0.0575369	0.885823
3134.16	0.437038	0.813746	-0.772235	0.523475	0.599045	0.106898	0.716384	0.551503	0.217799	0.386349
3145.6	0.102521	0.911979	-0.77802	0.502098	0.593032	0.108217	0.315828	0.501319	-0.047482	0.494262
3157.05	0.546927	1.02921	-0.79215	0.671343	0.183102	0.359359	0.256028	0.946686	-0.247452	0.656445
3168.5	0.805962	1.04873	-0.7059	0.437724	0.397171	0.405933	0.282738	0.88605	-0.122066	0.389697
3179.94	0.380818	1.11516	-0.444373	0.421393	0.610848	0.444449	0.173963	0.833251	-0.177344	0.488763
3191.39	0.392842	1.20521	-0.518443	0.369594	0.264354	0.240553	0.0448504	0.750552	-0.268539	0.336427
3202.84	0.336296	0.926338	-0.608502	0.106365	0.507983	0.099497	-0.0118434	1.14832	-0.12886	0.390335
3214.29	0.379018	0.720174	-0.665184	0.126101	0.44772	0.390342	0.145758	1.46699	0.148108	0.386281
3225.73	0.333493	0.657714	-1.10018	-0.0331813	0.468755	0.316115	-0.0583335	0.743814	-0.0696367	0.22323
3237.18	0.57868	0.529195	-1.10415	-0.170251	0.651866	0.590979	-0.242222	0.863006	-0.849938	0.00184273
3248.63	0.674395	0.549152	-0.867397	0.0119693	0.581012	0.641677	-0.0431975	1.22419	-0.316729	-0.175254
3260.07	0.497522	0.638486	-0.930307	0.298814	0.273123	0.523051	-0.0243412	1.07627	0.313379	-0.028768
3271.52	0.709537	0.733331	-0.868088	0.385454	0.16183	1.03008	0.00325812	1.14359	-0.239576	0.0318764
3282.97	0.549071	0.598844	-0.754069	0.276746	0.827833	0.746421	0.157347	1.38803	-0.127096	0.24982
3294.41	0.665874	0.446688	-0.49217	-0.192479	0.353665	0.284421	0.358878	0.859559	-0.224718	0.381212
3305.86	0.655633	0.39876	-0.336679	-0.471941	-0.0842806	0.525681	0.323337	0.802798	-0.331081	0.368698
3317.31	0.428212	0.363929	-0.615335	-0.281704	0.20923	0.409156	0.197882	1.32028	0.0821228	0.635185
3328.75	0.956236	0.426304	-0.58875	-0.599035	-0.136326	-0.0993949	0.468682	0.95529	-0.399265	0.764543
3340.2	1.02039	0.528423	-0.513495	-0.786699	0.159007	0.489455	0.803842	1.04044	0.301866	0.636361
3351.65	0.715183	0.458737	-0.622763	-0.772311	0.486395	1.09265	0.828909	1.08128	1.06142	0.557342
3363.1	1.14562	0.0752877	-0.5898	-0.911254	0.318052	0.589426	0.803754	0.977134	-0.237129	0.766413
3374.54	1.20942	0.10105	-0.694858	-0.889353	0.253308	0.726128	0.916817	0.919407	-0.426972	0.8097
3385.99	0.810571	0.246684	-0.58909	-0.884756	0.216001	0.813943	0.732728	0.701276	-0.206202	0.818417
3397.44	0.841325	0.220008	-0.283835	-0.821655	0.401346	0.478697	0.832225	0.732943	-0.402906	0.959241
3408.88	0.781947	0.48564	-0.16569	-0.756862	0.350932	0.539049	1.20297	0.356477	-0.223709	0.588742
3420.33	0.814621	0.399219	-0.0152189	-0.45632	0.283513	0.125155	1.13251	0.347364	-0.424811	0.441339
3431.78	0.946869	0.195747	0.0922215	-0.205245	0.34574	-0.276236	1.238	0.486575	-0.247163	0.757526
3443.22	0.707664	0.362048	0.262495	0.0819087	0.414853	-0.45384	1.35122	0.200252	-0.292459	0.654761
3454.67	0.705511	0.34539	0.163736	0.309888	0.543101	-0.541873	1.22596	0.196	-0.369063	0.514181
3466.12	0.886437	0.140629	-0.140434	0.0817103	0.512331	-0.308458	1.31747	0.0644463	-0.122643	0.583478
3477.56	0.671269	0.189726	0.176554	0.615183	0.507647	-0.374093	1.31273	0.0158536	-0.482904	0.582667
3489.01	0.69155	0.262959	0.360395	0.83656	0.365933	-0.321064	1.13966	-0.0709212	-0.418465	0.655289
3500.46	0.943496	0.0882715	0.259516	0.0934513	0.239805	-0.0669781	1.23163	-0.248269	-0.419993	0.659801
3511.9	0.674666	0.159344	0.514164	0.170959	0.274327	-0.19176	1.29539	-0.12843	-0.506428	0.578079
3523.35	0.550561	0.205043	0.475139	0.39944	0.456621	-0.129475	1.23428	-0.352744	-0.0723796	0.306827
3534.8	0.794174	0.0985815	0.354701	0.131274	0.561088	-0.0719745	1.13266	-0.406033	-0.345112	-0.0854069
3546.25	0.767361	0.0520368	0.151854	0.040927	0.190587	-0.454377	0.975443	-0.201952	-0.372501	-0.254948
3557.69	0.727092	-0.128541	-0.418811	0.0690592	0.151366	-0.400679	1.03604	-0.17108	-0.253634	-0.381284
3569.14	0.731033	-0.0636865	-0.480929	-0.110049	0.305115	-0.183686	0.958255	0.333249	-0.398101	-0.189632
3580.59	0.454997	0.0481334	-0.571251	-0.349407	-0.0157818	-0.373476	1.02987	0.357167	0.0836284	-0.0130237
3592.03	0.373103	-0.015641	-0.657915	-0.3652	-0.249504	-0.461663	1.21037	-0.0277398	-0.033345	-0.221279
3603.48	0.368619	-0.187611	-0.601632	-0.197964	-0.231216	-0.308747	1.10477	0.318399	-0.00779247	-0.194866
3614.93	0.314213	-0.187678	-1.1231	-0.37034	-0.0401144	-0.133276	1.14008	0.52375	0.172285	-0.407183
3626.37	0.331977	-0.0624484	-0.970255	-0.722757	0.0980584	-0.329718	0.940007	0.569838	-0.0883397	-0.827395
3637.82	0.24731	-0.122084	-0.623649	-0.537738	0.125543	-0.520907	0.924106	0.717621	0.146327	-0.95744
3649.27	0.28929	-0.0171529	-0.541108	-0.591177	0.0797533	-0.349	1.33172	0.616764	0.0483164	-1.11809
3660.71	0.177018	0.1573	-0.0957515	-0.814499	0.00635857	-0.302182	1.14794	0.615933	0.384992	-1.12363
3672.16	0.261043	0.349571	-0.109897	-0.674343	0.000651114	-0.301935	0.875956	0.971536	0.544327	-0.893275
3683.61	0.485278	0.245452	-0.0333793	-0.640067	-0.0434796	-0.323509	0.941119	1.0881	0.268701	-0.664277
3695.05	0.142714	0.0160124	-0.0012155	-0.698187	0.109278	-0.248135	0.971716	0.893405	0.593286	-0.625144
3706.5	0.0487051	0.157846	-0.337996	-0.611677	0.0625433	-0.201343	0.945832	1.01904	0.378612	-0.60452
3717.95	0.0905285	0.0608462	-0.26933	-0.391132	-0.0708742	-0.124602	0.94068	1.11679	0.408567	-0.562322
3729.4	-0.110415	-0.0824703	-0.365063	-0.408192	-0.197862	0.178984	0.988789	1.10074	0.525565	-0.672131
3740.84	-0.146572	-0.131231	-0.67446	-0.271684	-0.6821	0.192229	0.905884	1.20978	0.372097	-0.411464
3752.29	-0.31463	-0.143872	-0.631124	-0.256743	-0.559994	0.273345	0.857396	1.19531	0.427542	-0.217702
3763.74	-0.288296	-0.0410303	-0.567949	-0.404924	-0.41422	0.228876	0.820403	1.10632	0.290127	-0.276559
3775.18	-0.192627	-0.111533	-0.612835	-0.0447548	-0.622417	0.309821	0.692368	1.05901	0.199826	-0.156721
3786.63	-0.291835	0.126453	-0.793037	0.119033	-0.537863	0.511863	0.932376	1.10973	0.123267	-0.33629
3798.08	-0.340411	-0.121827	-0.979106	0.166509	-0.766491	0.10252	0.857681	0.916899	0.19334	-0.202064
3809.52	-0.559436	-0.560993	-0.8473	0.0540797	-0.867715	0.131619	0.510544	0.672137	0.154701	0.116586
3820.97	-0.546353	-0.0659145	-0.688897	0.0602707	-0.784307	0.160049	0.793565	0.742261	0.112341	-0.056811
3832.42	-0.421642	0.0334317	-0.772437	0.252717	-0.790548	-0.0413658	1.04536	0.587133	0.10872	0.112762
3843.86	-0.583348	0.109349	-0.780114	0.068559	-0.746358	-0.212296	1.16017	0.640188	-0.0560194	0.376978
3855.31	-0.51349	0.304181	-0.714368	0.343325	-0.920562	-0.348397	1.16688	0.666107	0.153474	0.243984
3866.76	-0.349234	0.269333	-0.839285	0.268003	-0.887174	0.0316721	0.971459	0.303116	0.289123	0.107927
3878.21	-0.284167	0.417361	-0.859406	0.0654066	-0.685577	-0.0120555	1.05723	0.32487	0.284687	0.0564102
3889.65	-0.290258	0.212392	-0.794437	0.330345	-0.363183	-0.145824	1.39237	0.366217	0.415466	0.0462542
3901.1	-0.240261	0.303944	-0.925847	0.0498243	-0.122585	0.0271445	1.65798	0.418048	0.369889	0.0471433
3912.55	-0.083296	0.649764	-0.983086	-0.060391	-0.177811	-0.0133602	1.37524	0.32067	0.238572	0.0216092
3923.99	-0.147461	0.604351	-0.827819	-0.126353	-0.116464	0.00303702	1.32489	0.155967	0.122178	-0.0517163
3935.44	-0.134754	0.447481	-0.6643	-0.472386	-0.175901	0.00889259	1.61225	0.296663	0.0102072	-0.035214
3946.89	-0.0746596	0.48516	-0.509399	-0.594773	-0.111459	-0.0194518	1.34521	0.279561	-0.107176	0.0762865
3958.33	0.0852107	0.640245	-0.15339	-0.520981	0.0890143	0.0700094	1.24072	0.344498	-0.227415	0.088222
3969.78	0.101308	0.384274	-0.0812401	-0.55787	0.0093717	0.129644	0.957698	0.27758	-0.210457	0.154808
3981.23	-0.0756179	0.429565	-0.452031	-0.753602	-8.2676e-05	0.0339751	0.996334	0.2082	-0.105775	0.237765
3992.67	0.164218	0.425896	-0.341877	-0.541023	0.0770856	-0.0189384	1.24835	0.331939	-0.132255	0.278694
4004.12	-0.00852293	0.282908	-0.013308	-0.370585	0.0896556	-0.0424395	0.748738	0.325775	-0.202958	0.310785
4015.57	-0.172278	0.608368	-0.267797	-0.442318	0.40256	-0.0447449	0.840646	0.302386	-0.0784449	0.0802584
4027.01	0.179478	0.303955	-0.375907	-0.534263	0.568837	-0.07569	1.0181	0.0772776	0.00639703	0.0719479
4038.46	0.0450517	0.246832	-0.212814	-0.570003	0.508875	-0.153499	0.932528	0.274467	-0.0177811	0.127112
4049.91	0.0755016	0.593965	-0.0721156	-0.482038	0.771796	0.159012	1.09193	0.431466	0.115029	-0.0852057
4061.36	0.320696	0.566598	0.0743109	-0.4602	0.682032	0.445453	1.08566	-0.0470655	0.162511	0.0311902
4072.8	-0.0410479	0.611617	-0.147664	-0.330259	0.883004	0.490994	1.04004	0.272326	0.120348	0.00439723
4084.25	-0.241573	0.509661	0.0287983	-0.453278	1.03895	0.642909	0.862298	0.538645	0.214122	0.0159174
4095.7	-0.0587128	0.630318	0.219134	-0.556323	0.559955	0.789603	0.726658	0.263704	0.308501	0.0346273
4107.14	-0.155294	0.639051	-0.106831	-0.468341	0.892241	0.694432	0.751385	0.393105	0.309159	-0.106968
4118.59	-0.119507	0.341933	-0.0431526	-0.538052	0.931545	0.465024	0.706465	0.352437	0.198294	0.120254
4130.04	0.0525836	0.718235	-0.0565376	-0.152415	0.814252	0.319397	0.798179	0.808099	0.219862	0.0765447
4141.48	-0.174978	0.817521	-0.35324	-0.105203	0.948184	0.11996	0.953473	0.828298	0.271221	-0.0169679
4152.93	-0.215892	0.414614	-0.57271	-0.624385	0.729397	0.120289	0.910081	0.744589	0.185016	-0.10893
4164.38	-0.172241	0.48419	-0.564333	-0.521098	0.843127	-0.00254299	0.889975	1.00984	0.211687	-0.148612
4175.82	-0.363754	0.426834	-0.566721	-0.238085	0.957633	-0.265356	0.915876	0.0905375	0.197608	-0.0643689
4187.27	-0.28382	0.143211	-0.643884	-0.0309115	1.05389	-0.359053	0.909874	0.641505	0.182179	-0.247231
4198.72	-0.228314	0.171826	-0.38036	0.0587386	0.773498	-0.700305	1.00109	-0.00339023	0.237301	-0.131603
4210.16	-0.252586	0.0873615	-0.409918	-0.0428611	0.672277	-0.884669	0.982403	-0.722056	0.111225	-0.103607
4221.61	-0.167776	-0.0767123	-0.427021	-0.0205561	0.872043	-0.88569	0.919197	1.30547	0.05661	0.177086
4233.06	-0.290286	0.318272	-0.100914	0.0935519	0.50977	-0.85588	1.03932	1.11572	0.0860793	0.276109
4244.51	-0.17165	0.14158	0.149898	0.256873	0.495549	-0.719689	1.05804	1.00071	-0.011898	-0.31052
4255.95	0.0311352	0.0155677	0.217101	0.295011	0.401808	-0.708074	0.902187	1.54498	-0.0799405	0.0615799
4267.4	-0.0250302	0.458885	0.193275	0.419286	0.301707	-0.581693	1.01881	1.29412	-0.0936441	0.25928
4278.85	0.0706269	0.280646	0.117933	0.670801	0.344353	-0.332417	0.989756	1.47324	-0.036996	-0.0381234
4290.29	-0.0575741	0.471858	-0.165377	0.849093	-0.0164346	-0.362195	0.877618	1.52814	0.020631	0.14604
4301.74	-0.0812676	0.246236	-0.147659	0.760253	-0.0709157	-0.392067	1.25543	1.4235	-0.00959675	0.133528
4313.19	0.147693	-0.158632	-0.253588	0.573017	-0.226882	-0.161057	1.30358	0.953085	-0.00294297	0.0604478
4324.63	-0.0625865	0.338491	-0.590457	0.610957	-0.237975	-0.220191	1.09953	1.27399	0.0338808	0.239926
4336.08	-0.0390665	0.484433	-0.456285	0.496616	-0.237495	-0.162898	1.27023	1.7159	-0.0465575	0.471193
4347.53	0.220815	0.484489	-0.0113252	0.333642	-0.552118	0.0160069	1.60627	1.3924	-0.140022	0.451582
4358.97	-0.11413	0.546591	0.0166161	0.250414	-0.409619	-0.0154171	1.55264	1.28697	-0.175694	0.295665
4370.42	-0.0435313	0.531823	-0.123508	0.0473899	-0.604573	0.0819149	1.35214	1.08422	-0.17963	0.293803
4381.87	0.289369	0.427647	0.0467218	0.0572375	-0.865653	-0.0344432	1.47972	1.03561	-0.163632	0.217286
4393.31	0.0925752	0.375931	-0.119054	0.0792382	-0.60188	0.150727	1.53087	1.20589	-0.127045	0.0954227
4404.76	0.270178	0.513942	0.439976	-0.262953	-0.341026	0.277237	1.40849	1.28355	-0.100761	0.279914
4416.21	0.30962	0.411803	0.534536	-0.140691	-0.423244	0.194259	1.17943	1.42572	-0.139764	0.294217
4427.66	0.137226	0.237889	-0.461807	0.156537	-0.524258	0.543511	1.29208	1.501	-0.0218387	0.115729
4439.1	0.0672656	0.282263	-0.33727	-0.183579	-0.319813	0.365925	1.46236	1.53605	0.0808436	0.362488
4450.55	-0.0126787	0.430111	-0.115514	-0.288861	-0.177357	0.173196	1.42351	1.5057	0.0346444	0.404923
4462	0.157033	0.322761	-0.370661	-0.182245	0.137968	0.217616	1.46828	1.42679	-0.120536	0.178263
4473.44	0.033049	0.285001	-0.658781	-0.244308	-0.00206904	0.153619	1.43838	1.44948	-0.252372	0.292702
4484.89	0.14501	0.36163	-0.390088	-0.180175	-0.0187952	0.179986	1.67023	1.47953	-0.109285	0.320027
4496.34	0.343829	0.216686	-0.0662537	-0.134454	0.455051	0.078313	1.27816	1.51487	-0.116494	0.304905
4507.78	0.293267	0.275841	-0.348376	-0.0385	0.240999	0.332361	0.889248	1.67178	-0.163425	0.0395775
4519.23	0.394427	0.162846	-0.156767	0.0559663	0.26942	0.184347	1.36297	1.90695	-0.0109482	-0.23317
4530.68	0.412617	-0.137912	-0.138937	0.110654	0.373868	-0.327573	1.28849	1.98332	0.00619577	0.268477
4542.12	0.445026	-0.0545678	-0.36857	0.294193	0.299604	-0.0189456	1.32424	1.89067	-0.0391284	0.527232
4553.57	0.105758	0.116265	-0.556257	0.343767	0.570762	0.0672968	1.42387	1.77081	-0.0584633	0.174156
4565.02	0.140735	0.215797	-0.673583	0.161199	0.572923	-0.438153	1.24624	1.6627	-0.0658542	0.156419
4576.47	0.274299	0.239902	-0.445207	0.139665	0.64047	-0.661383	1.3742	1.46206	-0.0180606	0.328835
4587.91	-0.0564767	0.209519	-0.471704	0.19142	0.61196	-0.433544	1.33026	1.29433	-0.0429839	0.284117
4599.36	0.186078	0.193834	-0.350707	0.189411	0.468842	-0.268835	1.35633	1.27157	-0.132375	0.0296228
4610.8	0.0539753	0.201693	-0.506776	0.215772	0.498917	-0.433372	1.34823	1.20568	-0.13635	-0.0759126
4622.25	-0.0603223	0.235765	-0.729295	0.3087	0.426873	-0.294147	1.31773	1.00076	-0.0517255	-0.201903
4633.7	0.320391	0.19235	-0.267326	0.558981	0.365798	-0.0562553	1.34618	0.763939	0.013412	-0.819004
4645.14	0.0161509	0.1335	-0.348866	0.599966	0.0565689	-0.103939	0.998529	0.788871	0.000525644	-0.300209
4656.6	-0.0912076	0.154703	-0.609644	0.804439	-0.0332105	-0.0698633	0.929976	0.816231	-0.0742392	0.378706
4668.04	0.0920179	0.207339	-0.358094	0.835499	0.0770635	-0.0285388	0.997913	0.658091	-0.126648	-0.159478
4679.49	0.00905486	0.0807791	-0.322312	0.462892	0.070248	-0.0117496	1.00357	0.749453	-0.095715	-0.233793
4690.93	0.0921251	-0.0216093	-0.595029	0.302491	0.0642341	0.105235	0.990634	0.899434	-0.0938149	-0.204186
4702.38	0.0346757	0.0909465	-0.584839	0.039227	-0.0510407	0.24919	0.947537	0.813989	-0.133625	-0.272956
4713.84	-0.0611704	0.0847768	-0.217425	-0.0234418	0.00180443	0.354349	1.07824	0.691483	-0.093788	-0.314478
4725.26	-0.0784003	0.0396215	-0.131887	-0.0582412	-0.164079	0.424751	0.965415	0.471871	-0.070075	-0.419577
4736.73	-0.383133	-0.0648916	-0.231207	-0.135518	-0.394834	0.389267	1.02576	0.451868	-0.125843	-0.182183
4748.16	-0.413945	-0.134141	-0.285626	0.100258	-0.0985097	0.407568	0.854905	0.63388	-0.0811131	-0.0973861
4759.62	-0.118707	-0.113622	-0.380294	0.047952	0.253692	0.548305	0.617028	0.668722	0.00604594	-0.26031
4771.07	-0.152548	-0.289793	-0.213719	0.185031	0.212954	0.496853	0.847455	0.725812	0.00351862	-0.361047
4782.49	-0.285839	-0.300061	-0.125762	0.484933	0.172552	0.395915	0.700822	0.601968	-0.0053826	-0.150231
4793.99	-0.276206	-0.230137	-0.1357	0.318778	0.25414	0.376377	0.674934	0.633859	0.00613377	-0.17489
4805.37	-0.137142	-0.18068	0.0734969	0.329673	0.303968	0.217073	0.742516	0.818563	-0.00238282	-0.0955446
4816.88	0.0822488	-0.15322	0.0899553	0.366279	0.293752	0.0872353	0.638654	0.605633	-0.00359796	0.29152
4828.29	0.210998	-0.231598	0.128946	0.386908	0.235844	0.0334871	0.70801	0.632208	0.0140097	0.0397102
4839.72	0.175112	-0.136136	0.481835	0.410716	0.374126	-0.148096	0.775572	0.715969	-0.0339597	0.0244593
4851.25	0.213063	-0.0975566	0.373249	0.28	0.492236	-0.161	0.873269	0.689206	-0.0562946	-0.049098
4862.55	0.271937	-0.0329831	-0.0491781	0.155246	0.42473	-0.035401	0.939951	0.764144	-0.0570183	-0.321564
4874.19	0.135515	-0.0879445	0.406099	-0.145824	0.364478	-0.0822713	0.769686	0.89262	-0.0502951	-0.11313
4885.43	0.204907	-0.158901	0.744426	-0.176431	0.412167	-0.214997	0.58146	1.11776	0.0617001	0.0179921
4897.04	0.265178	0.0641842	0.350671	0.0188441	0.381635	-0.021286	0.664222	0.953259	0.0660396	0.12644
4908.49	0.203935	0.0695181	0.435977	0.0354942	0.61252	-0.0320649	0.372575	0.874811	-0.0911051	0.00344638
4919.75	0.205781	0.0658101	0.460381	-0.0821106	0.687743	-0.00547799	0.22446	0.765574	-0.114227	-0.105844
4931.79	0.292315	0.126617	0.253737	-0.266944	0.338777	0.174572	0.418693	0.706336	-0.00260158	0.00969446
4942.33	0.898858	0.0247346	0.582029	-0.669399	1.10706	-1.375	-0.682266	1.80368	-0.00790551	0.0450725
