# Supplementary material for: How spatial release from masking may fail to function in a highly directional auditory system
Source: eLife. 2017 Apr 25;6:e20731. doi: 10.7554/eLife.20731 (PMC5443663; doi:10.7554/eLife.20731)
Supplement: Figure 4—source data 3. — The target signal was presented at 76 dB SPL while the masker intensity was varied to achieve three SNRs (−6, 0, +6 dB). ‘X’ and ‘Y’ coordinates of virtual walking paths measured from the treadmill system. Data plotted in Figure 4C (left). DOI: http://dx.doi.org/10.7554/eLife.20731.012 [file elife-20731-fig4-data3.xlsx]

## Sheet: x_minus6grp
Fly1	Fly2	Fly3	Fly4	Fly5	Fly6	Fly7	Fly8	Fly9	Fly10	Fly11	Fly12	Fly13			AVG	SEM
0.000253233	0.000393748	-3.12364e-07	3.06368e-08		-2.96827e-07		4.91598e-07	-1.75975e-07	-1.99237e-07	1.76974e-08		0.00034419			9.90727e-05	5.15836e-05
0.000102225	-6.45327e-06	6.27468e-07	-2.29543e-08		6.43103e-07		-9.68666e-07	4.04801e-07	3.07463e-07	-4.6354e-08		0.000176972			2.73689e-05	1.95284e-05
0.000171334	4.76689e-05	-1.21434e-06	-4.47487e-08		-1.35291e-06		1.83091e-06	-9.01998e-07	-3.80638e-07	1.14702e-07		3.44374e-05			2.51492e-05	1.71583e-05
9.35504e-05	9.38604e-05	2.24456e-06	2.96538e-07		2.76031e-06		-3.28044e-06	1.95149e-06	1.89536e-07	-2.71963e-07		0.000501321			6.92622e-05	4.95467e-05
6.55379e-06	4.30561e-05	-3.9011e-06	-1.05212e-06		-5.44729e-06		5.44472e-06	-4.10474e-06	9.59351e-07	6.21998e-07		0.00101235			0.000105448	0.000100866
0.000119898	0.000373851	6.09605e-06	3.09229e-06		1.02767e-05		-7.75277e-06	8.34428e-06	-4.98605e-06	-1.379e-06		0.00110811			0.000161555	0.000111622
2.1594e-05	0.0004836	-7.72457e-06	-8.2235e-06		-1.82971e-05		7.69237e-06	-1.63051e-05	1.67039e-05	2.98724e-06		0.00135825			0.000184028	0.000139108
-2.54243e-05	4.19714e-05	6.78807e-06	2.06373e-05		3.19411e-05		-2.19095e-06	3.19579e-05	-4.65661e-05	-6.20103e-06		0.000661477			7.14391e-05	6.61354e-05
0.000143563	0.000243774	1.4606e-05	-5.0162e-05		-4.47202e-05		-5.17513e-05	-5.68903e-05	0.000126122	1.20633e-05		0.000562527			8.99132e-05	6.16734e-05
-6.047e-05	0.000203808	-0.000154414	0.000111407		-1.22575e-05		0.000346821	4.73872e-05	-0.000344148	-2.75422e-05		0.000805208			9.158e-05	9.93209e-05
7.4961e-05	0.000408966	2.03577e-05	-0.000236566		-0.000213423		0.000297442	-0.000259875	0.00052985	5.56581e-05		0.000193327			8.70698e-05	8.66801e-05
0.000168457	0.000509596	0.000694074	0.000739873		0.00114469		-0.00112119	0.00137763	-0.00111903	7.67288e-05		0.00276994			0.000524077	0.00036464
0.00854792	0.0181402	0.0204027	-0.00110951		0.0162026		-0.0515908	0.0106573	0.0144103	0.00046652		-0.00253712			0.00335901	0.00663227
0.00965659	0.0289651	0.0347988	-0.000772934		0.0268272		-0.142928	0.0152902	0.0204455	-0.000718006		-0.0257453			-0.00341806	0.0164958
-0.00250464	0.0109604	0.0372184	-0.00224804		0.0260598		-0.236523	0.0070869	-0.00277119	-0.0075413		-0.067727			-0.023799	0.0252051
-0.0181036	-0.02898	0.0282251	-0.0056908		0.00767064		-0.322649	-0.0341379	-0.0310796	-0.0341866		-0.109876			-0.0548807	0.0318698
-0.0341828	-0.0947012	-0.000822037	-0.000393238		-0.0305847		-0.40162	-0.11428	-0.076393	-0.0678579		-0.151517			-0.0972353	0.0371608
-0.0536414	-0.169177	-0.0593652	-0.00483378		-0.0701429		-0.455417	-0.217074	-0.118138	-0.0969638		-0.186386			-0.143114	0.0405208
-0.0697932	-0.235631	-0.107448	-0.00931623		-0.102643		-0.487058	-0.337568	-0.1524	-0.124825		-0.221286			-0.184797	0.0447231
-0.0773582	-0.294448	-0.13946	-0.0101214		-0.120751		-0.533032	-0.455856	-0.166219	-0.154217		-0.264972			-0.221644	0.0526105
-0.0870619	-0.344447	-0.171448	-0.0187292		-0.139497		-0.602965	-0.569441	-0.155628	-0.199445		-0.308804			-0.259747	0.0621766
-0.0976595	-0.381457	-0.169497	-0.0330998		-0.186974		-0.68305	-0.685222	-0.140536	-0.222058		-0.312365			-0.291192	0.0726195
-0.119054	-0.413265	-0.185506	-0.0291054		-0.238352		-0.771766	-0.802402	-0.101862	-0.219648		-0.320352			-0.320131	0.0851737
-0.126634	-0.439832	-0.231378	-0.0158388		-0.273933		-0.866918	-0.917217	-0.0498929	-0.21846		-0.324711			-0.346481	0.0992363
-0.11491	-0.464985	-0.283705	-0.00844045		-0.263386		-0.9671	-1.01921	0.00944272	-0.214051		-0.317172			-0.364352	0.114135
-0.0889314	-0.50271	-0.312029	-0.0233663		-0.226147		-1.10155	-1.12017	0.0902434	-0.22061		-0.317578			-0.382285	0.132251
-0.0673802	-0.535832	-0.309239	-0.0439846		-0.205744		-1.22731	-1.22692	0.191854	-0.229701		-0.319551			-0.397381	0.151134
-0.0548407	-0.569886	-0.328882	-0.0618336		-0.212463		-1.30954	-1.34662	0.304098	-0.23033		-0.319379			-0.412967	0.1685
-0.0591463	-0.606818	-0.364553	-0.0690835		-0.237796		-1.30042	-1.48339	0.420609	-0.227413		-0.319428			-0.424744	0.182089
-0.0642552	-0.634397	-0.393763	-0.0669746		-0.281922		-1.2506	-1.62728	0.550325	-0.225222		-0.319519			-0.431361	0.195863
-0.0755555	-0.647742	-0.444817	-0.0566862		-0.354137		-1.23282	-1.77016	0.679187	-0.224407		-0.319337			-0.444647	0.211912
-0.0860258	-0.665514	-0.488908	-0.0443455		-0.423488		-1.24282	-1.91537	0.818407	-0.225853		-0.319866			-0.459379	0.230862
-0.0921016	-0.693095	-0.493708	-0.0379182		-0.497856		-1.2472	-2.05475	0.966968	-0.231248		-0.316958			-0.469788	0.250364
-0.105358	-0.730702	-0.479987	-0.0328088		-0.564547		-1.24376	-2.2069	1.1237	-0.24241		-0.302505			-0.478528	0.271531
-0.12437	-0.771422	-0.476557	-0.0297212		-0.615454		-1.2397	-2.35415	1.28651	-0.258605		-0.30057			-0.488403	0.292939
-0.151191	-0.823779	-0.489662	-0.0320663		-0.657721		-1.27522	-2.48365	1.45114	-0.273825		-0.304873			-0.504085	0.314506
-0.173908	-0.884732	-0.534419	-0.0486913		-0.740635		-1.36441	-2.59095	1.59263	-0.283844		-0.311264			-0.534022	0.334768
-0.195261	-0.949142	-0.593689	-0.0727518		-0.843931		-1.48863	-2.70101	1.74513	-0.285347		-0.313809			-0.569843	0.357438
-0.217879	-1.0043	-0.658427	-0.086504		-0.922283		-1.67165	-2.81551	1.91241	-0.289404		-0.317746			-0.607129	0.383336
-0.235913	-1.03334	-0.71776	-0.0934038		-1.02355		-1.85892	-2.90351	2.08443	-0.29665		-0.319533			-0.639815	0.408551
-0.245776	-1.03585	-0.759418	-0.0992806		-1.15502		-2.06894	-2.97873	2.24729	-0.306082		-0.327566			-0.672938	0.433721
-0.257546	-1.0076	-0.772392	-0.112413		-1.31782		-2.29862	-3.03317	2.37871	-0.322644		-0.341529			-0.708502	0.456685
-0.276399	-0.970992	-0.760473	-0.134825		-1.48173		-2.55351	-3.08901	2.56764	-0.343305		-0.347068			-0.738967	0.485844
-0.293724	-0.93675	-0.762031	-0.155181		-1.63548		-2.83743	-3.13789	2.7699	-0.371007		-0.354045			-0.771364	0.517752
-0.309925	-0.909082	-0.768198	-0.168647		-1.76402		-3.09568	-3.16403	2.99895	-0.391266		-0.356873			-0.792876	0.550098
-0.318092	-0.889122	-0.772073	-0.177312		-1.84324		-3.21249	-3.18729	3.17969	-0.413941		-0.355197			-0.798906	0.571753
-0.322232	-0.890727	-0.787907	-0.186947		-1.87465		-3.15457	-3.2162	3.3027	-0.449594		-0.355063			-0.793519	0.580247
-0.325849	-0.90498	-0.812919	-0.209383		-1.90274		-3.12647	-3.23903	3.36656	-0.478036		-0.35525			-0.798809	0.585224
-0.334403	-0.922174	-0.830621	-0.234464		-1.93455		-3.15547	-3.22985	3.42595	-0.500635		-0.354873			-0.807109	0.591025
-0.344243	-0.920596	-0.827104	-0.229642		-1.97003		-3.25416	-3.19614	3.51723	-0.524269		-0.355884			-0.810484	0.601778
-0.351028	-0.908762	-0.813855	-0.21141		-2.01701		-3.37774	-3.17507	3.59759	-0.551963		-0.347855			-0.81571	0.613996
-0.3554	-0.900398	-0.7996	-0.193407		-2.08525		-3.52252	-3.18351	3.73505	-0.588483		-0.333283			-0.82268	0.633727
-0.352719	-0.900824	-0.803474	-0.17761		-2.17963		-3.6802	-3.21945	3.88299	-0.625553		-0.331252			-0.838772	0.656724
-0.345861	-0.910056	-0.820362	-0.174821		-2.2563		-3.85738	-3.28158	4.09865	-0.664808		-0.36533			-0.857784	0.68643
-0.345075	-0.93105	-0.849353	-0.17765		-2.32655		-4.02907	-3.37541	4.32202	-0.699317		-0.405795			-0.881725	0.717539
-0.352906	-0.938343	-0.878223	-0.191814		-2.39399		-4.17586	-3.48513	4.52177	-0.72188		-0.417496			-0.903388	0.746168
-0.363344	-0.946205	-0.88798	-0.202836		-2.47634		-4.2908	-3.57256	4.72434	-0.740719		-0.409236			-0.916568	0.773146
-0.376646	-0.945788	-0.872593	-0.212549		-2.56407		-4.39427	-3.66964	4.91953	-0.737769		-0.404648			-0.925844	0.799522
-0.389777	-0.938754	-0.848728	-0.235435		-2.64233		-4.48689	-3.75502	5.11791	-0.731995		-0.408955			-0.931998	0.824844
-0.403351	-0.929816	-0.837994	-0.250013		-2.70194		-4.59026	-3.82306	5.31374	-0.732814		-0.426637			-0.938215	0.849386
-0.40838	-0.920038	-0.830326	-0.265097		-2.72953		-4.70382	-3.88125	5.49223	-0.746372		-0.463324			-0.945591	0.871832
-0.404291	-0.888882	-0.822955	-0.274455		-2.73382		-4.80551	-3.93009	5.62844	-0.777403		-0.498929			-0.950789	0.889513
-0.407956	-0.830792	-0.817129	-0.284308		-2.75021		-4.87058	-3.95612	5.72628	-0.827257		-0.529724			-0.95478	0.901736
-0.405457	-0.789644	-0.801299	-0.288275		-2.78697		-4.91397	-3.96687	5.80386	-0.889744		-0.53017			-0.956853	0.911442
-0.400882	-0.757629	-0.784897	-0.289912		-2.82131		-4.91871	-3.99351	5.88867	-0.952465		-0.528426			-0.955907	0.920517
-0.399899	-0.720748	-0.763461	-0.303833		-2.86048		-4.90424	-4.02614	5.98801	-1.01836		-0.532456			-0.95416	0.930179
-0.401184	-0.685642	-0.731989	-0.308045		-2.89112		-4.89626	-4.06875	6.0886	-1.07866		-0.525313			-0.949837	0.940668
-0.39915	-0.652467	-0.706586	-0.300031		-2.93566		-4.90124	-4.08627	6.19006	-1.11762		-0.535654			-0.944462	0.951285
-0.387536	-0.616294	-0.699443	-0.307919		-2.99732		-4.9025	-4.0976	6.28031	-1.14038		-0.567234			-0.943593	0.960808
-0.374941	-0.572339	-0.692495	-0.319118		-3.06101		-4.89774	-4.10854	6.3635	-1.1628		-0.611409			-0.943689	0.969546
-0.363643	-0.543947	-0.690886	-0.321724		-3.12281		-4.93067	-4.11374	6.44263	-1.19005		-0.671095			-0.950594	0.979416
-0.346887	-0.527094	-0.685382	-0.323797		-3.1455		-4.98991	-4.12178	6.50114	-1.23071		-0.723367			-0.959329	0.98801
-0.331381	-0.512764	-0.680355	-0.306863		-3.12978		-5.05396	-4.13399	6.5535	-1.28372		-0.792359			-0.967168	0.9957
-0.316225	-0.477451	-0.678495	-0.303349		-3.09861		-5.12192	-4.15333	6.60282	-1.34923		-0.856703			-0.975249	1.00336
-0.309667	-0.430039	-0.676199	-0.314264		-3.06244		-5.20232	-4.17275	6.66095	-1.41204		-0.912599			-0.983138	1.01226
-0.316243	-0.401626	-0.674631	-0.333125		-3.03237		-5.28955	-4.19237	6.72588	-1.45643		-0.971223			-0.994169	1.02196
-0.326145	-0.380265	-0.67188	-0.353961		-3.00677		-5.38553	-4.21532	6.80365	-1.49554		-1.01787			-1.00496	1.03335
-0.335534	-0.36747	-0.670832	-0.355514		-2.99771		-5.47729	-4.22769	6.8869	-1.53721		-1.03731			-1.01196	1.04516
-0.353499	-0.366758	-0.667666	-0.345869		-3.00004		-5.56076	-4.22011	6.94984	-1.56872		-1.03117			-1.01648	1.05435
-0.380178	-0.346906	-0.66649	-0.333585		-2.99389		-5.62647	-4.21279	7.02523	-1.59335		-1.01412			-1.01425	1.06365
-0.406846	-0.32643	-0.654965	-0.328153		-2.97985		-5.6389	-4.20492	7.11799	-1.61065		-1.01705			-1.00498	1.07166
-0.420831	-0.303134	-0.660365	-0.325269		-2.94751		-5.6114	-4.20715	7.21341	-1.62624		-1.0262			-0.991469	1.078
-0.425239	-0.286653	-0.702919	-0.32426		-2.89734		-5.5846	-4.23073	7.30778	-1.64883		-1.01822			-0.9811	1.08463
-0.429909	-0.252205	-0.732652	-0.321937		-2.83119		-5.58288	-4.27651	7.40143	-1.66732		-1.02015			-0.971332	1.09305
-0.429293	-0.201942	-0.745918	-0.311523		-2.77653		-5.59215	-4.33243	7.45761	-1.68978		-1.01676			-0.963873	1.09972
-0.431278	-0.160406	-0.745111	-0.292918		-2.75187		-5.59507	-4.38892	7.49237	-1.71166		-1.0101			-0.959496	1.1049
-0.434061	-0.126431	-0.727984	-0.274682		-2.73322		-5.59463	-4.46758	7.51492	-1.72807		-1.03068			-0.960242	1.10976
-0.438341	-0.110489	-0.715514	-0.257922		-2.72451		-5.5948	-4.5588	7.57523	-1.7391		-1.07658			-0.964084	1.11835
-0.449903	-0.09987	-0.712666	-0.24175		-2.72557		-5.59467	-4.64644	7.65943	-1.73981		-1.11775			-0.9669	1.12887
-0.459822	-0.0866435	-0.719875	-0.2347		-2.71633		-5.59476	-4.70672	7.74345	-1.73741		-1.14414			-0.965695	1.13817
-0.472719	-0.0689161	-0.723458	-0.248977		-2.69844		-5.59466	-4.74895	7.82877	-1.73966		-1.13776			-0.960477	1.14665
-0.486293	-0.0639275	-0.721249	-0.266324		-2.68461		-5.59483	-4.79083	7.90929	-1.74792		-1.13035			-0.957703	1.15475
-0.498166	-0.0467282	-0.716274	-0.277624		-2.65779		-5.59454	-4.81505	7.9959	-1.76827		-1.13068			-0.950921	1.16278
-0.51317	-0.0223314	-0.71669	-0.289583		-2.63157		-5.5952	-4.83173	8.08688	-1.78454		-1.1188			-0.941673	1.17097
-0.525361	0.0128461	-0.703952	-0.281509		-2.6096		-5.59211	-4.87456	8.17707	-1.78864		-1.10776			-0.929358	1.18015
-0.534232	0.0541568	-0.693982	-0.26932		-2.58854		-5.58798	-4.9218	8.28151	-1.78535		-1.10578			-0.915132	1.19076
-0.545105	0.074854	-0.696719	-0.255836		-2.56702		-5.58876	-4.97551	8.3836	-1.78716		-1.12645			-0.90841	1.20152
-0.551958	0.0824377	-0.707022	-0.254608		-2.56524		-5.58828	-5.01332	8.48793	-1.79606		-1.13536			-0.904148	1.21199
-0.556195	0.0845133	-0.717307	-0.264938		-2.5761		-5.58876	-5.02048	8.58367	-1.80417		-1.13752			-0.899727	1.2207
-0.564113	0.0816574	-0.719688	-0.2853		-2.5982		-5.58798	-5.03746	8.6591	-1.80971		-1.14133			-0.900302	1.22805
-0.574834	0.0759783	-0.719533	-0.304931		-2.61618		-5.59159	-5.05856	8.7221	-1.81435		-1.13748			-0.901937	1.23456
-0.58275	0.0763507	-0.719347	-0.307492		-2.6194		-5.59523	-5.08007	8.76197	-1.81683		-1.13867			-0.902147	1.23901
-0.587359	0.0852768	-0.716514	-0.300047		-2.61407		-5.59452	-5.09781	8.78848	-1.8173		-1.13554			-0.898941	1.24197
-0.588047	0.0932288	-0.716355	-0.292058		-2.60976		-5.59483	-5.11926	8.80595	-1.81795		-1.13458			-0.897367	1.24435
-0.587197	0.0976608	-0.716437	-0.283472		-2.6181		-5.59467	-5.14778	8.82815	-1.81799		-1.1373			-0.897712	1.24757
-0.588226	0.0995854	-0.71626	-0.276521		-2.61592		-5.59474	-5.1764	8.86298	-1.81994		-1.13786			-0.89633	1.25171
-0.588144	0.103445	-0.718468	-0.275838		-2.61502		-5.59471	-5.20932	8.8883	-1.82244		-1.13707			-0.896928	1.2552
-0.588076	0.104305	-0.719122	-0.275556		-2.61536		-5.5947	-5.21571	8.8932	-1.82261		-1.13686			-0.897049	1.25588

## Sheet: y_minus6grp
Fly1	Fly2	Fly3	Fly4	Fly5	Fly6	Fly7	Fly8	Fly9	Fly10	Fly11	Fly12	Fly13			AVG	SEM
-2.0058e-07	-6.19044e-07	-5.0354e-07	-5.19911e-08		-3.30116e-07		-6.03302e-07	-6.29538e-07	-1.0961e-06	-7.20322e-07		-2.66385e-07			-5.02092e-07	9.54095e-08
3.38472e-07	1.22625e-06	1.03975e-06	1.03391e-08		5.82229e-07		1.15741e-06	1.24677e-06	2.21096e-06	1.49265e-06		5.07275e-07			9.81209e-07	2.02166e-07
-5.05799e-07	-2.33281e-06	-2.07717e-06	1.97829e-07		-9.39637e-07		-2.11375e-06	-2.37141e-06	-4.29967e-06	-2.99375e-06		-9.17146e-07			-1.83533e-06	4.16766e-07
5.7873e-07	4.21699e-06	3.99671e-06	-8.85845e-07		1.2892e-06		3.60618e-06	4.28485e-06	7.99958e-06	5.78757e-06		1.54201e-06			3.2416e-06	8.34601e-07
-1.17416e-07	-7.10142e-06	-7.34883e-06	2.83885e-06		-1.12043e-06		-5.51555e-06	-7.20657e-06	-1.40384e-05	-1.07095e-05		-2.29941e-06			-5.26186e-06	1.62037e-06
-2.30719e-06	1.03616e-05	1.24713e-05	-8.05785e-06		-1.3337e-06		6.50583e-06	1.05422e-05	2.21887e-05	1.83462e-05		2.48183e-06			7.11988e-06	3.01209e-06
1.0159e-05	-1.10312e-05	-1.88479e-05	2.07477e-05		1.07308e-05		-2.19459e-06	-1.12574e-05	-2.91823e-05	-2.81211e-05		-3.81213e-08			-5.9035e-06	5.32415e-06
-2.83704e-05	7.67813e-06	2.95768e-05	-4.72914e-05		-3.56108e-05		-1.44655e-05	6.0236e-06	3.22274e-05	4.53752e-05		-7.03231e-06			-1.18893e-06	9.78752e-06
9.81285e-05	5.65162e-05	-6.36511e-06	0.000130973		0.000122964		0.000105967	5.48855e-05	5.18953e-05	-1.77129e-05		5.55416e-05			6.52794e-05	1.59364e-05
-0.000344911	-0.000478349	-0.000278014	-0.000363013		-0.000418729		-0.000498193	-0.000432687	-0.000604005	-0.000399545		-0.000271022			-0.000408847	3.23099e-05
-0.000256531	-0.000638335	-0.000796958	-0.000256578		6.60869e-05		-0.000266513	-0.000296973	-0.000842607	-0.00115561		-0.00043441			-0.000487843	0.000115088
-0.000257667	0.00294104	0.00296423	-0.00121833		-0.000675551		9.62085e-05	0.00226058	0.00243464	0.00502997		0.000213717			0.00137888	0.000639648
0.0414398	0.0804164	0.0658732	0.0379169		0.0391909		0.0636721	0.0643552	0.105993	0.0969352		0.0429591			0.0638752	0.0077235
0.158887	0.227873	0.197353	0.175019		0.129997		0.199545	0.16289	0.311424	0.290585		0.159352			0.201293	0.0187477
0.3353	0.382366	0.368333	0.389685		0.279045		0.38341	0.261683	0.595054	0.562051		0.328432			0.388536	0.0346022
0.558985	0.536609	0.560942	0.636422		0.476418		0.590048	0.348263	0.916638	0.876923		0.528367			0.602962	0.0546997
0.817199	0.704428	0.754013	0.892377		0.702169		0.813417	0.412322	1.27639	1.21697		0.748133			0.833742	0.0797388
1.06682	0.867761	0.928255	1.1495		0.917798		1.02791	0.463986	1.64949	1.5728		0.968102			1.06124	0.10841
1.2804	1.01676	1.06218	1.4007		1.12064		1.23776	0.513058	2.03755	1.9281		1.187			1.27841	0.139412
1.46103	1.15871	1.16427	1.63553		1.25962		1.42328	0.55674	2.41158	2.27395		1.38968			1.47344	0.171192
1.64678	1.2971	1.23766	1.82602		1.31203		1.57793	0.599435	2.76285	2.57599		1.53462			1.63704	0.201554
1.82471	1.43651	1.29521	1.96291		1.34826		1.69869	0.647215	3.09457	2.766		1.57239			1.76465	0.226219
1.9589	1.57314	1.40718	2.0785		1.36499		1.82216	0.69418	3.39527	2.87374		1.54907			1.87171	0.245639
2.07926	1.70562	1.53407	2.18502		1.37353		1.95353	0.742777	3.66213	2.9458		1.52783			1.97096	0.262281
2.16119	1.83845	1.66746	2.2889		1.40034		2.08162	0.783218	3.88823	2.98097		1.52598			2.06163	0.275023
2.22405	1.96901	1.78738	2.40831		1.42702		2.19185	0.824691	4.07297	3.01871		1.52792			2.14519	0.285902
2.2784	2.09225	1.87922	2.54334		1.43209		2.27155	0.868567	4.24599	3.06887		1.52912			2.22094	0.298008
2.31905	2.22269	1.96333	2.68967		1.42696		2.31244	0.921558	4.40551	3.10379		1.52914			2.28941	0.309234
2.3408	2.35351	2.0098	2.8443		1.42869		2.30002	0.968561	4.54844	3.09625		1.52909			2.34195	0.319429
2.36108	2.47378	2.04687	2.99088		1.43882		2.29214	1.01855	4.67221	3.09184		1.52917			2.39153	0.3287
2.3833	2.57644	2.07504	3.11008		1.46936		2.29309	1.06829	4.77943	3.09322		1.52902			2.43773	0.3363
2.41235	2.66606	2.10344	3.18662		1.51363		2.29279	1.12166	4.88997	3.09281		1.5291			2.48084	0.342896
2.45003	2.75465	2.09707	3.22067		1.59384		2.29268	1.18454	5.00784	3.09452		1.52842			2.52242	0.348413
2.50412	2.84773	2.07416	3.25384		1.70674		2.29777	1.24279	5.1268	3.10486		1.53273			2.56916	0.353946
2.57213	2.95065	2.06661	3.30343		1.81822		2.2986	1.30205	5.25974	3.1314		1.56664			2.62695	0.360662
2.65031	3.06559	2.08868	3.35167		1.94402		2.30225	1.36365	5.39828	3.1677		1.62595			2.69581	0.366711
2.71874	3.18446	2.15366	3.3962		2.05577		2.35558	1.43057	5.52088	3.20364		1.7048			2.77243	0.369869
2.78518	3.31758	2.22608	3.44985		2.16851		2.47636	1.49682	5.66766	3.21901		1.79369			2.86007	0.374125
2.85724	3.465	2.28468	3.51789		2.29849		2.62014	1.56933	5.82601	3.213		1.86369			2.95155	0.380046
2.92249	3.62518	2.30759	3.59791		2.4472		2.7998	1.64049	6.00146	3.20431		1.87141			3.04178	0.390647
2.97348	3.78469	2.29985	3.67699		2.60474		3.01593	1.6924	6.18222	3.21143		1.84571			3.12874	0.405095
3.01908	3.95805	2.29951	3.74472		2.78217		3.24267	1.73279	6.32614	3.2416		1.84604			3.21928	0.416974
3.05762	4.15545	2.29862	3.81195		2.97412		3.49177	1.79587	6.53142	3.28759		1.8565			3.32609	0.434356
3.08907	4.36196	2.30421	3.87558		3.16974		3.67875	1.84768	6.75292	3.34951		1.86905			3.42985	0.454226
3.10723	4.58513	2.31423	3.95458		3.36112		3.78001	1.88571	6.99451	3.42341		1.87357			3.52795	0.477296
3.11736	4.82185	2.34057	4.04473		3.55689		3.80677	1.9299	7.23665	3.51322		1.87309			3.6241	0.500586
3.12822	5.09637	2.38609	4.14398		3.74566		3.80893	1.97628	7.41378	3.5946		1.86965			3.71636	0.520002
3.1387	5.40634	2.43873	4.25699		3.95028		3.84631	2.04007	7.52421	3.64508		1.86939			3.81161	0.535633
3.1596	5.74304	2.49369	4.3728		4.16364		3.90918	2.11461	7.62153	3.69562		1.87147			3.91452	0.551844
3.18205	6.10162	2.56564	4.47766		4.38839		4.0961	2.19287	7.75054	3.75899		1.87158			4.03854	0.571908
3.20716	6.47754	2.62785	4.56946		4.61152		4.39048	2.28612	7.81846	3.8156		1.87028			4.16745	0.589799
3.22898	6.85782	2.69703	4.65537		4.81612		4.73867	2.39596	7.93643	3.87819		1.88578			4.30904	0.611907
3.2353	7.24132	2.76489	4.75934		5.02104		5.13521	2.52039	8.09256	3.95137		1.93197			4.46534	0.637497
3.23252	7.61371	2.82046	4.88245		5.24557		5.53204	2.62489	8.30655	4.02826		2.00193			4.62884	0.66827
3.23414	7.96693	2.87734	5.01938		5.4641		5.84399	2.70665	8.56178	4.08895		2.06334			4.78266	0.701444
3.24991	8.29943	2.94429	5.15806		5.69259		6.10141	2.79142	8.83556	4.12083		2.07372			4.92672	0.73609
3.28	8.61131	3.00589	5.30696		5.89699		6.35427	2.84603	9.12913	4.12354		2.04736			5.06015	0.773511
3.31398	8.89917	3.05955	5.4603		6.0921		6.62869	2.91051	9.42792	4.10991		2.0315			5.19336	0.810154
3.35555	9.15519	3.10999	5.62186		6.2674		6.92297	2.99423	9.71864	4.10775		2.04887			5.33024	0.842853
3.40759	9.39374	3.15804	5.77987		6.43425		7.2023	3.09281	10.0065	4.11288		2.11935			5.47073	0.871272
3.46738	9.61334	3.21069	5.91774		6.6147		7.43746	3.20023	10.2385	4.13488		2.21387			5.60488	0.892918
3.53534	9.81474	3.2597	6.04089		6.81913		7.6564	3.31732	10.3949	4.17386		2.31683			5.73292	0.908306
3.59488	10.0145	3.30427	6.17718		7.05394		7.80448	3.43294	10.55	4.22878		2.40317			5.85641	0.92332
3.64689	10.2178	3.34746	6.34276		7.32045		7.79631	3.55199	10.7107	4.29105		2.42057			5.9646	0.939001
3.71253	10.4201	3.39505	6.5113		7.61338		7.76386	3.67814	10.8734	4.36412		2.40532			6.07372	0.955775
3.78732	10.6179	3.45736	6.64931		7.92737		7.75795	3.78735	11.0456	4.43858		2.3953			6.1864	0.973827
3.86229	10.8104	3.5228	6.77551		8.24585		7.75418	3.87309	11.2327	4.50926		2.39173			6.29778	0.993473
3.94133	10.9985	3.55807	6.89671		8.55763		7.75538	3.96667	11.4267	4.56022		2.40126			6.40625	1.01418
3.9994	11.1914	3.55768	7.02983		8.86786		7.75465	4.06387	11.5918	4.58696		2.44628			6.50897	1.03459
4.03676	11.3806	3.55268	7.16664		9.18613		7.75406	4.15543	11.7667	4.61505		2.53189			6.6146	1.0552
4.05704	11.5683	3.5413	7.27111		9.52227		7.76466	4.22573	11.9535	4.65144		2.64592			6.72012	1.07722
4.07701	11.7733	3.5352	7.33182		9.84904		7.85306	4.29803	12.1245	4.70021		2.78386			6.83261	1.09866
4.09462	12.0024	3.53263	7.4286		10.1557		7.99828	4.37616	12.3008	4.7618		2.92928			6.95803	1.12137
4.11446	12.2457	3.53309	7.55033		10.4568		8.16341	4.46052	12.4606	4.83202		3.08345			7.09003	1.14355
4.13786	12.4855	3.52908	7.69628		10.7533		8.33956	4.55553	12.6308	4.89442		3.23355			7.22558	1.16661
4.17442	12.7246	3.5255	7.84817		11.0519		8.50369	4.65598	12.7786	4.94173		3.38057			7.35851	1.18866
4.22482	12.9617	3.52479	8.00865		11.3391		8.6459	4.75544	12.95	4.98673		3.53122			7.49283	1.21093
4.28135	13.194	3.52521	8.15818		11.5815		8.76768	4.85193	13.1484	5.03949		3.65368			7.62014	1.23333
4.34912	13.4281	3.52386	8.28192		11.7787		8.83046	4.93672	13.3199	5.0937		3.71344			7.72559	1.25446
4.42247	13.6601	3.52889	8.42855		11.9312		8.83257	5.0172	13.4847	5.14476		3.6904			7.81409	1.27591
4.49525	13.892	3.56767	8.58521		12.0682		8.80922	5.09125	13.6483	5.18739		3.6652			7.90096	1.29597
4.55966	14.1263	3.5869	8.7317		12.2202		8.80348	5.18124	13.8502	5.23432		3.66641			7.99605	1.31839
4.6144	14.3542	3.59148	8.84442		12.4205		8.8096	5.28198	14.0197	5.27389		3.66752			8.08778	1.34136
4.66535	14.5778	3.61517	8.92731		12.6562		8.80928	5.38815	14.1341	5.2926		3.66965			8.17356	1.36235
4.70798	14.8127	3.66017	8.99561		12.9001		8.80958	5.50939	14.2091	5.31414		3.6655			8.25843	1.38175
4.74434	15.0663	3.70173	9.07518		13.1302		8.80943	5.62331	14.3064	5.34304		3.68593			8.34859	1.40243
4.7887	15.3316	3.73196	9.16664		13.3294		8.80948	5.72822	14.4595	5.38014		3.73266			8.44583	1.42467
4.83245	15.5967	3.7588	9.26577		13.4963		8.80947	5.7975	14.6617	5.40984		3.79781			8.54263	1.44856
4.87957	15.8672	3.7632	9.3774		13.6392		8.80946	5.86046	14.8954	5.41704		3.87019			8.6379	1.47465
4.92736	16.1304	3.7511	9.4957		13.7807		8.80947	5.92234	15.1503	5.40797		3.89465			8.727	1.5042
4.97778	16.386	3.74624	9.63023		13.9343		8.80946	6.00256	15.4107	5.39431		3.86632			8.8158	1.53555
5.03341	16.5988	3.76016	9.7639		14.1047		8.80947	6.09071	15.6985	5.39401		3.85322			8.91069	1.56474
5.08674	16.7723	3.76512	9.86345		14.3086		8.80951	6.13108	16.0005	5.42254		3.85133			9.00112	1.59386
5.14121	16.8824	3.74905	9.97317		14.5011		8.80944	6.15482	16.3206	5.46057		3.84271			9.0835	1.62132
5.19524	16.9371	3.73196	10.1045		14.7047		8.80944	6.16902	16.6572	5.49845		3.8841			9.16917	1.64594
5.24523	16.9843	3.72912	10.2366		14.9208		8.80395	6.18194	17.0107	5.54536		3.96218			9.26201	1.66997
5.298	17.0492	3.74241	10.3774		15.115		8.80278	6.20572	17.364	5.60198		4.04742			9.36039	1.69315
5.34496	17.1142	3.76109	10.5034		15.2785		8.80364	6.22662	17.7168	5.65213		4.12101			9.45224	1.71596
5.37785	17.1746	3.77562	10.6419		15.4046		8.80014	6.23263	18.0568	5.65524		4.14008			9.52595	1.74075
5.40031	17.2113	3.78481	10.7684		15.5104		8.79616	6.24	18.3695	5.63571		4.1177			9.58342	1.76475
5.42503	17.2195	3.78504	10.8608		15.6217		8.79723	6.25488	18.6671	5.62939		4.11181			9.63725	1.78597
5.45159	17.2158	3.78126	10.8877		15.7286		8.79536	6.2725	18.9273	5.63146		4.11071			9.68022	1.80376
5.47373	17.2161	3.77899	10.8742		15.8446		8.79014	6.30131	19.1151	5.63223		4.11482			9.71413	1.81754
5.48086	17.2262	3.77914	10.8902		15.9608		8.79059	6.34451	19.2272	5.62971		4.11674			9.7446	1.82784
5.47559	17.2419	3.77908	10.9218		16.083		8.79021	6.39532	19.3306	5.62859		4.11207			9.77582	1.83866
5.46849	17.2588	3.77913	10.9446		16.225		8.79077	6.45259	19.4208	5.6297		4.11159			9.80815	1.84923
5.46701	17.264	3.77911	10.9579		16.3799		8.78847	6.51298	19.4698	5.63079		4.11479			9.83648	1.85711
5.46705	17.264	3.77911	10.9606		16.4115		8.78734	6.52505	19.4768	5.63088		4.11513			9.84175	1.85852

## Sheet: x_equalgrp
Fly1	Fly2	Fly3	Fly4	Fly5	Fly6	Fly7	Fly8	Fly9	Fly10	Fly11	Fly12	Fly13			AVG	SEM
-0.00120105	-3.86808e-07	1.29547e-08	-3.72986e-08		-8.19997e-08		-4.98721e-08	-6.17588e-07	-1.18121e-07	-3.28055e-07		4.58589e-08			-0.000120261	0.000120088
-0.000970765	7.40897e-07	-1.86849e-08	9.44092e-08		9.01946e-08		8.1161e-08	1.27455e-06	2.221e-07	6.66282e-07		-1.40704e-07			-9.67755e-05	9.71101e-05
-0.00107169	-1.35033e-06	1.92432e-08	-2.27795e-07		-2.23053e-09		-1.13099e-07	-2.54517e-06	-3.94744e-07	-1.30622e-06		3.84611e-07			-0.000107723	0.000107108
-0.00101793	2.2962e-06	5.12312e-09	5.28837e-07		-4.08556e-07		1.03678e-07	4.89226e-06	6.45473e-07	2.45497e-06		-9.80327e-07			-0.000100839	0.0001019
-0.00103966	-3.49036e-06	-1.12134e-07	-1.18872e-06		1.74387e-06		8.38629e-08	-8.97415e-06	-9.11037e-07	-4.37076e-06		2.3782e-06			-0.00010545	0.000103806
-0.001033	4.07599e-06	4.44029e-07	2.60217e-06		-5.54513e-06		-8.48265e-07	1.53145e-05	8.54083e-07	7.0858e-06		-5.53894e-06			-0.000101456	0.000103523
-0.00103	-1.15244e-06	-1.35867e-06	-5.47727e-06		1.5364e-05		3.20459e-06	-2.31691e-05	6.25879e-07	-9.75792e-06		1.25016e-05			-0.000103922	0.000102955
-0.00104438	-1.07034e-05	4.07857e-06	1.10439e-05		-3.84201e-05		-9.26902e-06	3.16002e-05	-5.78109e-06	1.19251e-05		-2.76842e-05			-0.000107759	0.000104262
-0.00100988	6.68786e-05	-9.70127e-06	-2.42915e-05		0.000100084		2.65463e-05	-1.66666e-05	2.42785e-05	7.32978e-06		5.74192e-05			-7.78001e-05	0.000104319
-0.00109528	-0.000301421	1.27759e-05	4.544e-05		-0.00025573		-7.73226e-05	-0.000208882	-9.93737e-05	-0.000170337		-0.000111788			-0.000226192	0.000102605
-0.000917363	2.91488e-05	-0.000103066	7.19813e-06		0.000246718		8.8776e-05	-7.66038e-06	0.000103675	-0.000183832		0.000309211			-4.27194e-05	0.000107693
-0.000950953	5.42651e-06	0.000365461	0.000393303		-0.00108641		-0.000203026	0.00228074	8.70679e-05	0.00127026		-0.000508039			0.000165383	0.000320097
0.00068617	0.0327868	0.00270424	-0.00256092		0.0135163		0.00440409	0.0355528	0.00781861	0.0298256		-0.00218149			0.0122552	0.00472459
-0.00644024	0.0847914	0.008622	-0.0201534		0.0468748		0.00916333	0.038711	0.00849334	0.0683366		-0.0179774			0.0220422	0.0114008
-0.02796	0.133233	0.0123025	-0.0494897		0.0864303		0.00446252	0.0156992	-0.00559864	0.0978608		-0.0572515			0.0209688	0.0203739
-0.0420075	0.160608	0.0238708	-0.0925167		0.106043		-0.0121748	-0.0187543	-0.0209548	0.120523		-0.104586			0.012005	0.0284596
-0.059657	0.162102	0.0379142	-0.123675		0.0956958		-0.0325885	-0.0929158	-0.0511266	0.121013		-0.161807			-0.0105046	0.0346022
-0.0769415	0.155492	0.0566444	-0.159704		0.061186		-0.0600767	-0.177318	-0.0881997	0.101154		-0.212127			-0.0399891	0.0400866
-0.0821335	0.142778	0.0652893	-0.196605		0.000636538		-0.0856585	-0.288752	-0.13582	0.0916194		-0.256692			-0.0745338	0.0468973
-0.0861636	0.135258	0.0742055	-0.225757		-0.0226038		-0.0984944	-0.409425	-0.185836	0.0807447		-0.29524			-0.103331	0.0559246
-0.06575	0.139022	0.0872078	-0.247269		-0.00321399		-0.108853	-0.513459	-0.24146	0.072964		-0.318227			-0.119904	0.0657456
-0.0283844	0.150768	0.096537	-0.24471		0.0214279		-0.123719	-0.615726	-0.315241	0.0889215		-0.348989			-0.131911	0.0776526
0.0133918	0.153877	0.102781	-0.236646		0.0250284		-0.137272	-0.727755	-0.381959	0.108228		-0.377733			-0.145806	0.0898897
0.0387692	0.151932	0.0910881	-0.228589		0.0237066		-0.14732	-0.828968	-0.456168	0.128249		-0.387124			-0.161442	0.100463
0.046041	0.145853	0.0663456	-0.238904		0.00926923		-0.142611	-0.900174	-0.529199	0.141247		-0.377687			-0.177982	0.107573
0.0491829	0.135843	0.0376447	-0.258932		-0.034554		-0.14166	-1.00722	-0.587492	0.136344		-0.370458			-0.204131	0.115921
0.0622411	0.126816	0.00927242	-0.288253		-0.0950984		-0.149527	-1.12039	-0.644442	0.124579		-0.372242			-0.234704	0.125093
0.0794867	0.122956	-0.0116342	-0.316139		-0.157381		-0.157048	-1.22112	-0.701248	0.120054		-0.374458			-0.261653	0.134323
0.0888909	0.129945	-0.0346185	-0.340056		-0.21385		-0.164053	-1.31419	-0.742604	0.119999		-0.373572			-0.28441	0.142902
0.0959898	0.122401	-0.0512228	-0.357671		-0.25276		-0.167138	-1.39897	-0.775454	0.119389		-0.373513			-0.303895	0.15038
0.0988821	0.107129	-0.0528145	-0.353561		-0.273181		-0.167127	-1.46968	-0.827697	0.119397		-0.377716			-0.319637	0.157477
0.0983339	0.099822	-0.0534825	-0.333071		-0.27581		-0.164872	-1.52564	-0.875163	0.119401		-0.38573			-0.329621	0.163528
0.100495	0.100191	-0.0484132	-0.318641		-0.268893		-0.167738	-1.57724	-0.93516	0.119395		-0.395121			-0.339113	0.170198
0.0899516	0.0995414	-0.0523532	-0.316889		-0.276732		-0.174423	-1.63444	-0.994443	0.119402		-0.405026			-0.354541	0.176691
0.0792571	0.0958812	-0.0488559	-0.331369		-0.301773		-0.179622	-1.71186	-1.05218	0.119399		-0.416717			-0.374784	0.184747
0.0752647	0.0922511	-0.0422279	-0.379593		-0.366702		-0.180425	-1.80654	-1.10549	0.119397		-0.426493			-0.402055	0.194148
0.0765618	0.0946496	-0.0382345	-0.433995		-0.461283		-0.181881	-1.92477	-1.15757	0.119407		-0.437647			-0.434477	0.20584
0.0842894	0.0840963	-0.0296691	-0.480481		-0.564716		-0.182173	-2.07074	-1.19679	0.119384		-0.450624			-0.468742	0.219555
0.0887878	0.069721	-0.0136229	-0.508016		-0.693048		-0.187117	-2.23486	-1.23025	0.119423		-0.471442			-0.506043	0.234999
0.0926184	0.0728866	-0.00346405	-0.523387		-0.822375		-0.197444	-2.40007	-1.23172	0.119275		-0.489899			-0.538358	0.250256
0.0889869	0.0971227	-0.0064107	-0.529615		-0.966201		-0.225563	-2.55218	-1.23626	0.119622		-0.504009			-0.571451	0.265143
0.0767836	0.141262	-0.00312981	-0.51987		-1.11668		-0.262035	-2.68778	-1.24791	0.12217		-0.527249			-0.602445	0.280015
0.0629467	0.154678	0.00408344	-0.508499		-1.2499		-0.3038	-2.80773	-1.26717	0.132702		-0.580524			-0.636322	0.293176
0.0715143	0.146731	0.0055863	-0.528044		-1.35489		-0.348512	-2.90314	-1.30062	0.1523		-0.642611			-0.670169	0.304183
0.0947569	0.165008	0.00639838	-0.537737		-1.46556		-0.378877	-2.964	-1.34421	0.175919		-0.696425			-0.694472	0.314502
0.121787	0.175832	0.0168351	-0.548879		-1.53981		-0.401611	-3.02904	-1.38564	0.214244		-0.732671			-0.710895	0.324956
0.155454	0.185607	0.0199712	-0.574941		-1.58409		-0.414467	-3.09352	-1.4278	0.254407		-0.762714			-0.72421	0.334678
0.187901	0.188192	0.0268174	-0.599816		-1.58432		-0.421559	-3.14625	-1.45753	0.291938		-0.78884			-0.730347	0.341821
0.224668	0.173827	0.0204946	-0.633014		-1.57617		-0.432579	-3.20035	-1.46222	0.325151		-0.802313			-0.73625	0.347409
0.256109	0.151339	0.0219392	-0.674743		-1.57324		-0.447653	-3.25265	-1.45676	0.354467		-0.812619			-0.743381	0.352474
0.292375	0.128139	0.0390377	-0.713111		-1.57926		-0.464967	-3.31111	-1.4491	0.382714		-0.839789			-0.751507	0.358851
0.323233	0.108799	0.0327348	-0.730398		-1.59721		-0.478486	-3.35936	-1.45056	0.415626		-0.875753			-0.761138	0.364642
0.344373	0.0951483	0.0335716	-0.714465		-1.61199		-0.493467	-3.40507	-1.47248	0.451985		-0.931673			-0.770407	0.3709
0.358938	0.0879041	0.0357859	-0.687767		-1.62185		-0.513143	-3.4599	-1.50477	0.452872		-1.01114			-0.786307	0.376896
0.381221	0.0869234	0.0549208	-0.684745		-1.65094		-0.538377	-3.51084	-1.54569	0.438102		-1.09996			-0.806939	0.383634
0.413418	0.0770148	0.0727586	-0.697818		-1.6842		-0.566336	-3.56877	-1.59167	0.405572		-1.18513			-0.832516	0.390641
0.445227	0.0652715	0.0726344	-0.733733		-1.70792		-0.594003	-3.60677	-1.61212	0.34426		-1.25991			-0.858706	0.393782
0.479391	0.057357	0.0721152	-0.766104		-1.75211		-0.628633	-3.63694	-1.61449	0.280729		-1.30937			-0.881806	0.396396
0.518124	0.0526734	0.0717619	-0.79794		-1.79108		-0.663523	-3.67582	-1.6055	0.219705		-1.35122			-0.902282	0.399771
0.551345	0.0633677	0.0658886	-0.824096		-1.81949		-0.697845	-3.70812	-1.59952	0.174181		-1.38865			-0.918294	0.403095
0.579042	0.078675	0.0594888	-0.827514		-1.84542		-0.736312	-3.74134	-1.59798	0.132861		-1.41044			-0.930894	0.406476
0.585773	0.0787275	0.0471002	-0.826785		-1.86224		-0.777255	-3.77943	-1.60425	0.11085		-1.42397			-0.945148	0.409225
0.579599	0.0904174	0.042859	-0.810141		-1.88677		-0.808314	-3.80511	-1.61424	0.104369		-1.44513			-0.955246	0.411967
0.575671	0.107123	0.0441863	-0.786851		-1.9031		-0.833459	-3.8292	-1.63167	0.0946417		-1.46792			-0.963058	0.414923
0.581355	0.111214	0.0620566	-0.769259		-1.91823		-0.864958	-3.84793	-1.66548	0.0822906		-1.48792			-0.971685	0.418104
0.589223	0.109539	0.115728	-0.751217		-1.98187		-0.898094	-3.84687	-1.71592	0.0728579		-1.49981			-0.980644	0.422324
0.594726	0.115808	0.171482	-0.727323		-2.07443		-0.92447	-3.85607	-1.78498	0.0473823		-1.51349			-0.995135	0.428547
0.60685	0.119992	0.204744	-0.736232		-2.17669		-0.958143	-3.87456	-1.84461	-0.00740464		-1.54549			-1.02115	0.434594
0.617638	0.124167	0.233229	-0.769545		-2.28657		-0.999044	-3.90134	-1.90306	-0.0773768		-1.59358			-1.05555	0.441156
0.650529	0.129835	0.255576	-0.785225		-2.38316		-1.02306	-3.94737	-1.95795	-0.146427		-1.63919			-1.08464	0.44978
0.70171	0.156313	0.279706	-0.785071		-2.44575		-1.02839	-3.99565	-2.00756	-0.209519		-1.68268			-1.10169	0.459278
0.74289	0.179621	0.307602	-0.796925		-2.49976		-1.02416	-4.03454	-2.05112	-0.274396		-1.72297			-1.11738	0.467319
0.769431	0.203583	0.324232	-0.810247		-2.55252		-1.0272	-4.07401	-2.09878	-0.348719		-1.75683			-1.13711	0.474295
0.779623	0.217614	0.343461	-0.835747		-2.60034		-1.04186	-4.11852	-2.14709	-0.447514		-1.78			-1.16304	0.479968
0.789817	0.224076	0.355821	-0.855445		-2.67253		-1.04643	-4.15686	-2.19464	-0.549637		-1.81237			-1.19182	0.485892
0.802612	0.221861	0.373629	-0.896063		-2.75852		-1.03234	-4.18891	-2.22686	-0.642767		-1.85565			-1.2203	0.49196
0.819814	0.225437	0.398386	-0.909611		-2.86873		-1.01061	-4.22645	-2.25477	-0.721677		-1.90429			-1.24525	0.500528
0.82123	0.244147	0.417224	-0.91432		-2.97101		-0.994306	-4.28306	-2.29574	-0.804537		-1.93679			-1.27172	0.509907
0.819517	0.275678	0.442775	-0.939638		-3.07322		-0.969142	-4.36182	-2.32227	-0.869097		-1.97515			-1.29724	0.521294
0.823738	0.301689	0.47882	-0.961233		-3.1771		-0.934649	-4.43396	-2.34964	-0.855863		-1.99794			-1.31061	0.533524
0.838864	0.338682	0.524423	-0.976002		-3.27177		-0.913823	-4.485	-2.36809	-0.830218		-1.99817			-1.31411	0.544893
0.848435	0.382312	0.550145	-1.00695		-3.34098		-0.916352	-4.48392	-2.38396	-0.82983		-1.99641			-1.31775	0.550584
0.851111	0.40621	0.552563	-1.04061		-3.4292		-0.930488	-4.48908	-2.4056	-0.841133		-1.99005			-1.33163	0.555548
0.846462	0.411267	0.551874	-1.06856		-3.53386		-0.947205	-4.5037	-2.44334	-0.850041		-1.99141			-1.35285	0.561316
0.853998	0.406718	0.563425	-1.08649		-3.62634		-0.962909	-4.51618	-2.49166	-0.853193		-1.99459			-1.37072	0.567568
0.870067	0.404617	0.583708	-1.07787		-3.69868		-0.965326	-4.53546	-2.53924	-0.862594		-1.99136			-1.38121	0.574317
0.88022	0.400885	0.597445	-1.0736		-3.75067		-0.956129	-4.55422	-2.588	-0.868206		-1.99807			-1.39103	0.579864
0.893249	0.400652	0.622211	-1.0815		-3.78456		-0.944883	-4.56469	-2.64237	-0.865919		-2.01779			-1.39856	0.585102
0.904059	0.40983	0.647487	-1.08624		-3.8227		-0.945752	-4.57777	-2.68609	-0.865556		-2.0315			-1.40542	0.590546
0.90774	0.423098	0.671505	-1.08495		-3.84645		-0.950816	-4.59837	-2.72333	-0.866499		-2.03574			-1.41038	0.595307
0.904192	0.442568	0.699674	-1.0925		-3.85917		-0.946578	-4.60574	-2.76128	-0.869137		-2.04868			-1.41366	0.598992
0.890477	0.469202	0.730304	-1.07501		-3.86953		-0.937531	-4.59729	-2.78819	-0.867071		-2.04344			-1.40881	0.601327
0.882625	0.492427	0.767173	-1.06247		-3.86078		-0.92676	-4.59497	-2.82055	-0.858657		-2.02027			-1.40022	0.603556
0.876949	0.512579	0.797639	-1.05878		-3.8643		-0.914361	-4.59364	-2.85262	-0.85311		-2.00948			-1.39591	0.606235
0.866011	0.528243	0.797299	-1.0666		-3.87689		-0.901296	-4.60761	-2.89198	-0.849332		-2.00116			-1.40033	0.608781
0.864773	0.554179	0.785429	-1.06641		-3.90612		-0.891816	-4.62437	-2.93166	-0.85642		-2.00364			-1.40761	0.612609
0.853938	0.578235	0.784308	-1.06458		-3.94423		-0.887059	-4.65118	-2.9751	-0.876009		-2.01065			-1.41923	0.617418
0.841822	0.595819	0.802179	-1.06618		-3.97897		-0.883959	-4.6913	-3.0244	-0.906613		-2.00363			-1.43152	0.623223
0.840867	0.623617	0.830249	-1.07153		-4.02061		-0.881218	-4.73105	-3.05894	-0.952582		-2.00001			-1.44212	0.63004
0.834329	0.652239	0.854097	-1.08333		-4.06958		-0.888333	-4.75604	-3.07276	-1.00857		-2.00655			-1.45445	0.635314
0.839765	0.689834	0.888167	-1.09763		-4.10701		-0.899885	-4.7906	-3.09289	-1.05479		-2.01481			-1.46398	0.642109
0.848181	0.714138	0.905102	-1.10816		-4.11755		-0.901779	-4.83367	-3.11649	-1.06647		-2.02187			-1.46986	0.647572
0.854622	0.723077	0.910477	-1.11204		-4.11765		-0.902457	-4.86005	-3.1311	-1.06308		-2.03369			-1.47319	0.65043
0.862413	0.729975	0.917435	-1.11602		-4.12256		-0.905567	-4.88871	-3.13798	-1.06171		-2.03948			-1.47622	0.653369
0.860554	0.737221	0.914569	-1.12059		-4.12139		-0.916738	-4.9099	-3.14777	-1.06564		-2.03744			-1.48071	0.654724
0.864619	0.746548	0.907266	-1.12118		-4.11256		-0.930199	-4.929	-3.17951	-1.05893		-2.03032			-1.48433	0.656414
0.869859	0.750455	0.896847	-1.11624		-4.10778		-0.938941	-4.94974	-3.21415	-1.0569		-2.03239			-1.4899	0.658331
0.870578	0.750563	0.89453	-1.11422		-4.10794		-0.940003	-4.95381	-3.21901	-1.05773		-2.03337			-1.49104	0.658663

## Sheet: y_equalgrp
Fly1	Fly2	Fly3	Fly4	Fly5	Fly6	Fly7	Fly8	Fly9	Fly10	Fly11	Fly12	Fly13			AVG	SEM
-3.91257e-07	-6.02863e-07	-2.76908e-07	-4.72652e-07		-1.31549e-07		-1.08135e-07	-7.72598e-07	-7.45728e-07	-4.25373e-07		-4.64708e-07			-4.39177e-07	7.20147e-08
7.47537e-07	1.15899e-06	4.49871e-07	8.91503e-07		1.4402e-07		7.23362e-08	1.44147e-06	1.57497e-06	8.41164e-07		8.68661e-07			8.19052e-07	1.57665e-07
-1.35773e-06	-2.1224e-06	-6.24384e-07	-1.59112e-06		-4.47014e-10		1.95166e-07	-2.53398e-06	-3.2255e-06	-1.59671e-06		-1.53102e-06			-1.43881e-06	3.38694e-07
2.29748e-06	3.63583e-06	5.65484e-07	2.62093e-06		-6.64355e-07		-1.16239e-06	4.07227e-06	6.38908e-06	2.87844e-06		2.47165e-06			2.31044e-06	7.14112e-07
-3.46432e-06	-5.60452e-06	4.84987e-07	-3.75661e-06		2.81572e-06		4.02669e-06	-5.55014e-06	-1.21868e-05	-4.82916e-06		-3.40087e-06			-3.1465e-06	1.47989e-06
3.91951e-06	6.72141e-06	-4.83631e-06	3.6225e-06		-9.004e-06		-1.18135e-05	4.45022e-06	2.1853e-05	6.95978e-06		2.81246e-06			2.46851e-06	3.00084e-06
-6.61654e-07	-2.67187e-06	1.81451e-05	1.8894e-06		2.49282e-05		3.11616e-05	6.7811e-06	-3.60978e-05	-7.19729e-06		3.6797e-06			3.99565e-06	5.95127e-06
-1.06585e-05	-1.23299e-05	-4.905e-05	-1.89089e-05		-5.9764e-05		-7.43773e-05	-4.11063e-05	6.21834e-05	5.54575e-06		-2.30552e-05			-2.21521e-05	1.21767e-05
7.25352e-05	0.00010281	0.000153522	0.0001036		0.00016608		0.000197252	0.000182198	-5.7743e-05	4.33668e-05		0.000111532			0.000107515	2.40091e-05
-0.000348213	-0.000524169	-0.000525258	-0.000457414		-0.000483826		-0.000508407	-0.000756782	-0.000299695	-0.000364392		-0.000465276			-0.000473343	4.01325e-05
-0.000225522	-0.000417619	-0.000112136	-0.000292955		-9.56145e-05		0.000113576	3.45259e-05	-0.00112876	-0.000676504		-0.000212801			-0.00030138	0.000116219
0.000405051	0.000883845	9.02375e-05	0.000185687		-0.000939136		-0.00227906	0.000516067	0.00525958	0.0022476		-3.02634e-05			0.000633961	0.000632693
0.045909	0.0724476	0.0547535	0.0586537		0.0454276		0.037491	0.0807741	0.0882075	0.0664648		0.056121			0.060625	0.00514458
0.14346	0.223757	0.183491	0.19556		0.177267		0.162926	0.220217	0.240081	0.212799		0.183005			0.194256	0.00947667
0.273075	0.405125	0.343261	0.400501		0.353041		0.352977	0.385272	0.421443	0.405915		0.362354			0.370296	0.0137752
0.418983	0.591148	0.532785	0.636233		0.560313		0.579373	0.571372	0.618576	0.613382		0.581902			0.570407	0.0193191
0.566585	0.783276	0.757043	0.889892		0.720363		0.805749	0.755156	0.81779	0.811193		0.823092			0.773014	0.027237
0.70937	0.97844	0.988077	1.13402		0.763248		1.02377	0.922284	1.0299	1.01611		1.07138			0.963659	0.0419961
0.839193	1.1675	1.19572	1.33555		0.789937		1.22149	1.09298	1.24199	1.21648		1.31993			1.14208	0.0589315
0.947268	1.32938	1.38262	1.47803		0.821013		1.38862	1.25903	1.43414	1.40423		1.5498			1.29941	0.0740884
1.04789	1.46652	1.55801	1.59034		0.831743		1.53583	1.39308	1.60056	1.57069		1.73728			1.43319	0.0883877
1.16084	1.55766	1.72356	1.70343		0.817029		1.68439	1.51835	1.75028	1.69781		1.88335			1.54967	0.101902
1.27326	1.62452	1.8599	1.82402		0.811581		1.8195	1.64936	1.90194	1.82657		1.96567			1.65563	0.112673
1.37868	1.68867	1.95928	1.94437		0.831888		1.90271	1.76591	2.05372	1.90672		1.97239			1.74044	0.11809
1.46538	1.76014	2.03905	2.04004		0.860699		1.92036	1.83766	2.19268	1.92066		1.98074			1.80174	0.121468
1.54792	1.84664	2.11512	2.17819		0.904466		1.92748	1.87331	2.2892	1.90026		1.9811			1.85637	0.123919
1.62872	1.92937	2.1899	2.33656		0.982108		1.96169	1.91229	2.38853	1.88719		1.9711			1.91874	0.126312
1.70369	1.99832	2.27178	2.50109		1.08601		2.02352	1.96213	2.49491	1.88556		1.96556			1.98926	0.129451
1.7691	2.05027	2.35665	2.66679		1.20881		2.10236	1.99708	2.59553	1.88524		1.96356			2.05954	0.133243
1.82673	2.10371	2.44218	2.80662		1.3404		2.18319	2.03108	2.67558	1.88637		1.96256			2.12584	0.136173
1.88658	2.15489	2.52346	2.92682		1.48165		2.26464	2.08131	2.75983	1.88543		1.98922			2.19538	0.138405
1.94376	2.20101	2.60783	3.02621		1.61974		2.33537	2.15639	2.83659	1.88472		2.03361			2.26452	0.13993
1.98806	2.24355	2.68531	3.11257		1.73692		2.39577	2.25563	2.91582	1.88479		2.08343			2.33018	0.142472
2.01576	2.274	2.76627	3.22895		1.83791		2.46305	2.37871	2.99397	1.88489		2.14739			2.39909	0.148591
2.04567	2.29642	2.86507	3.39473		1.91286		2.53673	2.51684	3.07786	1.88383		2.21925			2.47493	0.160353
2.0862	2.32881	2.9773	3.60427		1.9659		2.60709	2.64596	3.17585	1.88304		2.29642			2.55708	0.176763
2.12942	2.39375	3.09673	3.83607		2.01173		2.64988	2.79032	3.2735	1.8834		2.37972			2.64445	0.194915
2.17666	2.49804	3.21836	4.08094		2.10388		2.71058	2.94812	3.38913	1.8836		2.47994			2.74892	0.212741
2.25689	2.62093	3.33603	4.33178		2.27108		2.76748	3.12883	3.51632	1.88471		2.54106			2.86551	0.229121
2.3623	2.73794	3.45946	4.60143		2.45323		2.82608	3.33759	3.63672	1.88473		2.54803			2.98475	0.248224
2.46692	2.85323	3.59072	4.86419		2.67204		2.89642	3.56621	3.77308	1.8847		2.57306			3.11406	0.267965
2.56817	2.94812	3.71976	5.09714		2.94164		2.9571	3.80874	3.93468	1.8865		2.60702			3.24689	0.287188
2.65834	3.07459	3.85207	5.28999		3.2595		3.02786	4.05705	4.11266	1.90052		2.6314			3.3864	0.304914
2.71907	3.2582	3.99465	5.4852		3.62031		3.10803	4.30227	4.28809	1.92767		2.68619			3.53897	0.323285
2.7652	3.47193	4.15649	5.66242		3.9988		3.20125	4.53795	4.45322	1.95885		2.76911			3.69752	0.341418
2.82769	3.69796	4.3066	5.84483		4.39928		3.31229	4.77863	4.59836	1.99232		2.88216			3.86401	0.359861
2.8922	3.94659	4.46847	6.05705		4.81668		3.43314	5.02495	4.76444	2.02752		3.02791			4.04589	0.381791
2.94345	4.18926	4.64785	6.27921		5.24066		3.55341	5.28577	4.9465	2.07185		3.21261			4.23706	0.40593
2.97495	4.44547	4.81975	6.49746		5.68356		3.66731	5.55713	5.13795	2.12742		3.43246			4.43435	0.431601
3.02429	4.71264	4.97583	6.70854		6.15001		3.80677	5.82706	5.32275	2.19565		3.66728			4.63908	0.456777
3.09492	4.97573	5.11225	6.91641		6.6455		3.9591	6.08646	5.50707	2.28226		3.90567			4.84854	0.481873
3.15689	5.2159	5.24102	7.12287		7.13059		4.10394	6.33497	5.69381	2.39536		4.16638			5.05617	0.506202
3.20937	5.46175	5.37043	7.34163		7.61151		4.24607	6.58471	5.87878	2.52639		4.4506			5.26813	0.531389
3.28611	5.71357	5.49785	7.5753		8.07106		4.38694	6.83873	6.06867	2.68001		4.74809			5.48663	0.555123
3.37218	5.96294	5.61238	7.79224		8.51457		4.54485	7.09638	6.26206	2.84836		5.04997			5.70559	0.57686
3.45958	6.2148	5.7347	8.00344		8.94299		4.73266	7.36145	6.4464	3.00078		5.34819			5.9245	0.59877
3.55117	6.4743	5.88058	8.2002		9.3415		4.93819	7.61494	6.60756	3.10433		5.64706			6.13598	0.620677
3.64168	6.72752	6.05276	8.35693		9.70955		5.10993	7.86914	6.74395	3.25144		5.94819			6.34111	0.638076
3.72507	6.98146	6.22564	8.4896		10.0506		5.29417	8.12765	6.864	3.44518		6.25079			6.54541	0.651337
3.82657	7.23652	6.43782	8.65528		10.3733		5.46614	8.39396	6.97687	3.66428		6.55709			6.75878	0.66332
3.94404	7.4863	6.67363	8.8513		10.6797		5.63863	8.67216	7.1082	3.90805		6.86619			6.98282	0.674009
4.07151	7.73249	6.9112	9.07904		10.9656		5.81991	8.95798	7.27606	4.18912		7.17768			7.21805	0.682545
4.2001	7.96771	7.18537	9.32449		11.2487		6.0092	9.25871	7.4753	4.51125		7.49672			7.46775	0.68982
4.33193	8.18526	7.46386	9.5697		11.5586		6.21189	9.56354	7.70217	4.86611		7.81532			7.72684	0.697168
4.4601	8.39452	7.70134	9.83533		11.8605		6.43598	9.87557	7.95871	5.22657		8.13677			7.98854	0.704924
4.5945	8.58548	7.92316	10.0813		12.1324		6.65308	10.1919	8.22099	5.54339		8.44967			8.23759	0.712544
4.72251	8.75275	8.12662	10.3048		12.3991		6.80678	10.4947	8.49909	5.75957		8.74392			8.46099	0.725207
4.86246	8.90876	8.33176	10.5072		12.6506		6.93078	10.7969	8.80491	5.88953		9.01388			8.66969	0.740164
5.03844	9.05913	8.55455	10.6859		12.8962		7.08321	11.1025	9.11815	5.98317		9.25711			8.87783	0.753104
5.23392	9.21534	8.79071	10.8751		13.1385		7.24381	11.4149	9.4379	6.05007		9.47355			9.08738	0.766482
5.44685	9.38174	9.03876	11.0542		13.404		7.39977	11.739	9.77022	6.16474		9.69091			9.30902	0.77892
5.66364	9.57923	9.29878	11.2762		13.7013		7.58958	12.0716	10.0747	6.28521		9.92369			9.5464	0.79342
5.85714	9.80219	9.54869	11.5124		13.9935		7.78122	12.4078	10.354	6.39327		10.173			9.78231	0.810018
6.00551	10.0442	9.81142	11.7473		14.2956		7.94692	12.7489	10.628	6.51975		10.4289			10.0177	0.829712
6.10435	10.3131	10.0777	11.955		14.5954		8.08723	13.0943	10.876	6.66513		10.6791			10.2447	0.851172
6.13081	10.5881	10.3254	12.1362		14.8992		8.18564	13.4419	11.1157	6.82437		10.91			10.4557	0.876909
6.13643	10.8666	10.5626	12.3073		15.2192		8.30072	13.7884	11.3372	7.00807		11.1497			10.6676	0.903097
6.17981	11.1569	10.7841	12.4622		15.5568		8.42866	14.1337	11.5925	7.20984		11.4337			10.8938	0.927549
6.25308	11.4309	10.9939	12.6023		15.9074		8.53879	14.4443	11.8456	7.38988		11.6996			11.1106	0.951051
6.3482	11.6555	11.1962	12.7353		16.2615		8.64878	14.7482	12.0966	7.49954		11.9008			11.3091	0.975769
6.45401	11.8424	11.3783	12.875		16.6261		8.74042	15.0574	12.3378	7.56429		12.0441			11.492	1.00288
6.56531	11.9773	11.5504	13.0131		16.9765		8.80214	15.3362	12.5541	7.61169		12.1372			11.6524	1.02882
6.68122	12.0658	11.7161	13.1508		17.3107		8.83964	15.5873	12.7798	7.61745		12.2161			11.7965	1.05518
6.80421	12.1388	11.8846	13.3189		17.6279		8.8737	15.8411	13.0236	7.59733		12.286			11.9396	1.08241
6.92705	12.2167	12.0644	13.53		17.9312		8.9176	16.1028	13.2729	7.58121		12.344			12.0888	1.10968
7.03069	12.3195	12.2483	13.7531		18.2414		8.95457	16.3672	13.521	7.57361		12.4066			12.2416	1.13882
7.15061	12.4286	12.4043	13.9703		18.5556		9.00121	16.6109	13.7732	7.57274		12.477			12.3944	1.16615
7.28084	12.5459	12.5329	14.1831		18.864		9.08119	16.797	14.0191	7.57729		12.5668			12.5448	1.18909
7.40171	12.677	12.6391	14.3927		19.1558		9.16684	16.9805	14.2594	7.58004		12.698			12.6951	1.21138
7.5101	12.8168	12.7582	14.5928		19.4258		9.2481	17.1698	14.4833	7.57899		12.8391			12.8423	1.23327
7.61663	12.9604	12.8955	14.7811		19.6818		9.36064	17.3363	14.6845	7.57859		13.0096			12.9905	1.25206
7.72	13.103	13.037	14.9509		19.9339		9.49	17.4777	14.879	7.58118		13.2084			13.1381	1.26882
7.82669	13.2535	13.1884	15.098		20.1743		9.62781	17.6368	15.0671	7.58697		13.4233			13.2883	1.28465
7.94515	13.3967	13.3487	15.2363		20.4108		9.78014	17.8195	15.2718	7.60086		13.6727			13.4483	1.30001
8.07951	13.5432	13.5078	15.3837		20.6414		9.91026	18.0071	15.4867	7.632		13.9424			13.6134	1.31478
8.22079	13.6683	13.6411	15.5358		20.8798		10.0184	18.1974	15.6969	7.68139		14.2184			13.7758	1.32978
8.3653	13.787	13.7652	15.7099		21.1093		10.118	18.4048	15.9077	7.76149		14.5108			13.944	1.34402
8.49965	13.9132	13.9052	15.8842		21.3154		10.2035	18.6185	16.1124	7.86381		14.7688			14.1085	1.35675
8.61785	14.0484	14.0688	16.0634		21.5025		10.2715	18.835	16.2849	7.98836		14.992			14.2673	1.368
8.70884	14.1831	14.1991	16.2325		21.664		10.3213	18.9738	16.4428	8.12388		15.2121			14.4061	1.37589
8.76313	14.2968	14.2903	16.3991		21.8326		10.348	19.0317	16.608	8.25007		15.3785			14.5198	1.38411
8.79888	14.3847	14.3626	16.5631		22.0074		10.3619	19.0661	16.7904	8.3287		15.4714			14.6135	1.39551
8.8256	14.4469	14.4056	16.7159		22.1828		10.3784	19.0954	16.9607	8.38597		15.5404			14.6938	1.40789
8.85331	14.495	14.446	16.8684		22.3657		10.3952	19.1342	17.1104	8.43736		15.5956			14.7701	1.42101
8.87628	14.5415	14.484	17.0249		22.5632		10.4037	19.1736	17.2524	8.485		15.6418			14.8446	1.43571
8.89664	14.5954	14.5261	17.1883		22.7525		10.4116	19.2171	17.4175	8.49141		15.6714			14.9168	1.45279
8.9175	14.6551	14.574	17.3581		22.9159		10.4145	19.262	17.5869	8.47247		15.6991			14.9856	1.47006
8.92171	14.6668	14.5839	17.3926		22.9489		10.4145	19.2706	17.6202	8.46853		15.7046			14.9992	1.47357

## Sheet: x_plus6grp
Fly1	Fly2	Fly3	Fly4	Fly5	Fly6	Fly7	Fly8	Fly9	Fly10	Fly11	Fly12	Fly13			AVG	SEM
-1.35867e-07	3.66551e-08	-2.02991e-07	-5.40512e-08		-1.22446e-07		3.47347e-07	-1.32597e-07	-2.76502e-07	-0.000605235		-2.42995e-07			-6.06019e-05	6.05148e-05
2.69578e-07	-5.07719e-08	4.23314e-07	3.22373e-08		2.78854e-07		-5.99142e-07	3.27038e-07	5.48903e-07	-0.000909906		4.92178e-07			-9.08184e-05	9.10098e-05
-5.1396e-07	4.54319e-08	-8.55113e-07	1.11697e-07		-6.15676e-07		9.31569e-07	-7.73213e-07	-1.0472e-06	-0.000513369		-9.61891e-07			-5.17048e-05	5.12964e-05
9.31648e-07	4.31075e-08	1.66695e-06	-6.42399e-07		1.3203e-06		-1.17587e-06	1.76554e-06	1.89941e-06	-0.000785775		1.80048e-06			-7.78166e-05	7.86628e-05
-1.57287e-06	-3.9214e-07	-3.11509e-06	2.22675e-06		-2.75163e-06		6.74719e-07	-3.91038e-06	-3.21082e-06	-0.00041681		-3.18556e-06			-4.32047e-05	4.15165e-05
2.3238e-06	1.45962e-06	5.43636e-06	-5.65285e-06		5.53393e-06		2.67043e-06	8.39487e-06	4.77143e-06	-0.000780491		5.12853e-06			-7.50425e-05	7.83921e-05
-2.59701e-06	-4.47786e-06	-8.61727e-06	1.64673e-05		-1.07038e-05		-1.43892e-05	-1.74729e-05	-5.30392e-06	-0.000705249		-6.96368e-06			-7.59307e-05	6.99839e-05
1.35695e-06	1.20448e-05	1.35848e-05	-6.52423e-05		2.07635e-05		4.59476e-05	3.59498e-05	2.47705e-06	-0.000972541		7.54983e-06			-8.98109e-05	9.85259e-05
1.229e-05	-2.71364e-05	-8.51881e-06	-5.54395e-06		-3.51745e-05		-0.000143528	-6.9479e-05	2.09124e-05	-0.000728241		6.77551e-06			-9.77644e-05	7.17167e-05
-7.84596e-05	8.10282e-05	-7.86356e-05	-0.000125791		2.64103e-05		0.000444107	0.00010767	-0.000157069	-0.000194557		-0.000108897			-8.41947e-06	5.94346e-05
-5.31326e-05	-0.0002572	-0.000220251	0.000114998		-0.000196862		-0.000396581	-0.000306426	5.09759e-05	-0.00110483		-2.60329e-05			-0.000239534	0.000109077
1.57321e-06	-0.00033451	0.00088097	-0.000653092		0.00074029		0.00117561	0.000905343	0.000615815	0.000476013		0.000506761			0.000431478	0.000184547
0.0111598	-0.000462874	0.0197531	0.00973888		0.00800345		-0.0300826	0.00502818	0.0188185	0.00830804		0.0161416			0.0066406	0.00452993
0.0336436	0.0214992	0.0533773	0.0211531		0.0168733		-0.0749925	0.0115685	0.0333126	0.0209736		0.0298992			0.0167308	0.010841
0.06287	0.0542761	0.0891675	0.0196268		0.015995		-0.10346	0.0191549	0.0395842	0.0477391		0.0367542			0.0281707	0.0162693
0.0827678	0.0577694	0.121344	0.0077438		0.00184339		-0.112935	0.00741535	0.0294247	0.0743838		0.0392754			0.0309033	0.0200489
0.0758641	0.0558349	0.145273	-0.0120224		-0.0160642		-0.096342	-0.0175063	0.00389983	0.0947751		0.0312799			0.0264992	0.0218383
0.0344868	0.0617025	0.162067	-0.0306381		-0.0330999		-0.0687588	-0.0607592	-0.0310625	0.111561		0.0144103			0.0159908	0.024216
-0.0281178	0.0685667	0.171801	-0.0404223		-0.0420713		-0.0460872	-0.112887	-0.0656882	0.110846		-0.00896319			0.000697713	0.02788
-0.0881323	0.0657705	0.177144	-0.0412291		-0.0341112		-0.0455868	-0.17377	-0.0968599	0.108798		-0.0279065			-0.0155883	0.0330283
-0.14898	0.0584657	0.188613	-0.0186762		-0.0283596		-0.0836732	-0.23273	-0.132118	0.0958793		-0.052086			-0.0353666	0.039491
-0.207115	0.0572792	0.202524	0.00336986		-0.0420207		-0.131383	-0.279512	-0.171127	0.0748951		-0.0652908			-0.055838	0.0462285
-0.2552	0.0491843	0.195948	0.0353694		-0.0518614		-0.202382	-0.323221	-0.227035	0.0607894		-0.071512			-0.078992	0.0530481
-0.292825	0.0445824	0.16914	0.0607256		-0.0470977		-0.24441	-0.378587	-0.29727	0.0452226		-0.0801728			-0.102069	0.0594394
-0.307992	0.0429429	0.163202	0.0738296		-0.0251765		-0.27277	-0.452567	-0.351193	0.026299		-0.0851001			-0.118853	0.0665544
-0.320724	0.0361077	0.164653	0.0802823		0.00246785		-0.312859	-0.534222	-0.398872	0.0090119		-0.0800907			-0.135424	0.0747737
-0.340031	0.0277219	0.176139	0.0714257		0.0178937		-0.360062	-0.603517	-0.478063	-0.00414726		-0.0873821			-0.158002	0.0838824
-0.360322	0.0144728	0.175468	0.0582712		0.00325944		-0.374004	-0.667764	-0.569502	-0.00316208		-0.104789			-0.182807	0.0913578
-0.390661	0.00693611	0.171321	0.0634976		-0.0204685		-0.359996	-0.743163	-0.68329	0.00491947		-0.121484			-0.207239	0.101135
-0.43181	0.00295609	0.150237	0.0838427		-0.0342433		-0.348716	-0.82385	-0.806965	0.00972257		-0.129			-0.232783	0.112725
-0.478213	0.00131276	0.130112	0.100731		-0.0339468		-0.347123	-0.896015	-0.935281	0.0118987		-0.129845			-0.257637	0.125088
-0.532126	0.000370007	0.117682	0.113842		-0.0219863		-0.347329	-0.97158	-1.06446	0.0133315		-0.129442			-0.28217	0.138599
-0.589833	0.000996851	0.107235	0.11804		0.00257345		-0.347327	-1.05786	-1.18197	0.0126476		-0.127823			-0.306332	0.152323
-0.656502	0.00191942	0.105561	0.107628		0.0204985		-0.34731	-1.12455	-1.2803	0.0114161		-0.128664			-0.32903	0.163728
-0.724863	-0.0154169	0.0920902	0.0964568		0.045253		-0.347335	-1.2109	-1.38194	0.0126927		-0.125827			-0.355979	0.176098
-0.79557	-0.0509085	0.0640438	0.0723214		0.0774477		-0.347733	-1.31132	-1.48895	0.0123833		-0.125077			-0.389337	0.188806
-0.864088	-0.0856723	0.0382355	0.0222112		0.0873374		-0.353552	-1.4058	-1.56426	0.0123517		-0.139851			-0.425309	0.197838
-0.936254	-0.125585	0.018878	-0.0277534		0.0793554		-0.352243	-1.49521	-1.60108	0.00160219		-0.167737			-0.460602	0.203566
-1.01466	-0.159214	0.0324139	-0.0591615		0.0709154		-0.321551	-1.57362	-1.6107	-0.0223102		-0.195935			-0.485382	0.208737
-1.06185	-0.195279	0.067082	-0.0618899		0.0432023		-0.275222	-1.62901	-1.64504	-0.0497382		-0.212086			-0.501983	0.21445
-1.08945	-0.246927	0.089124	-0.038048		-0.0162221		-0.195613	-1.66879	-1.66992	-0.0790094		-0.223883			-0.513874	0.2182
-1.11144	-0.296699	0.107377	-0.0234867		-0.106303		-0.116471	-1.6957	-1.69562	-0.0743336		-0.238279			-0.525096	0.221506
-1.15681	-0.34539	0.118254	-0.0289461		-0.211637		-0.0293314	-1.71513	-1.72409	-0.0616309		-0.260345			-0.541506	0.225375
-1.22805	-0.401087	0.111826	-0.0359768		-0.330412		0.00439233	-1.72992	-1.75727	-0.0500075		-0.282265			-0.569877	0.228696
-1.29709	-0.460349	0.0908788	-0.0494213		-0.434198		-0.00384621	-1.74748	-1.79099	-0.0440837		-0.314967			-0.605154	0.230795
-1.35305	-0.501164	0.0807933	-0.0371387		-0.50123		-0.0421663	-1.77184	-1.81896	-0.0515503		-0.35155			-0.634785	0.233037
-1.38477	-0.525259	0.0812216	-0.0457429		-0.527259		-0.0557341	-1.78449	-1.83935	-0.0738897		-0.378451			-0.653372	0.234061
-1.38236	-0.540869	0.0759498	-0.0647908		-0.519659		-0.0556246	-1.78586	-1.84885	-0.0782751		-0.386156			-0.658649	0.233598
-1.36197	-0.545116	0.0691373	-0.0626451		-0.483543		-0.0453901	-1.79552	-1.84767	-0.078917		-0.401593			-0.655322	0.233512
-1.34895	-0.546953	0.0776186	-0.0376106		-0.439442		0.0348569	-1.80725	-1.84911	-0.0902161		-0.419843			-0.64269	0.237109
-1.35419	-0.54976	0.0908469	0.0126465		-0.400804		0.0967277	-1.82445	-1.8595	-0.111062		-0.446045			-0.634559	0.242338
-1.3767	-0.56059	0.105584	0.0393217		-0.38713		0.125271	-1.84675	-1.87555	-0.136294		-0.490273			-0.640311	0.246643
-1.39883	-0.570193	0.121561	0.0392962		-0.410799		0.107289	-1.88521	-1.91161	-0.167104		-0.560622			-0.663622	0.249999
-1.40629	-0.56963	0.139977	0.0351968		-0.43964		0.0505211	-1.93471	-1.96933	-0.209572		-0.627343			-0.693082	0.25329
-1.43146	-0.557479	0.145971	0.0268931		-0.464513		0.0114356	-1.98093	-2.03811	-0.229621		-0.664891			-0.71827	0.258445
-1.46732	-0.524638	0.140364	0.0388209		-0.501226		0.006538	-2.02682	-2.11004	-0.250036		-0.68777			-0.738213	0.26556
-1.50371	-0.486018	0.138576	0.0705285		-0.533509		0.0392511	-2.06469	-2.1793	-0.275027		-0.712513			-0.750642	0.27424
-1.52107	-0.4494	0.129828	0.0930297		-0.552702		0.0855469	-2.09002	-2.24857	-0.291435		-0.71905			-0.756384	0.282035
-1.53424	-0.405995	0.11547	0.101092		-0.558891		0.0981568	-2.11811	-2.30356	-0.302393		-0.725778			-0.763425	0.287655
-1.51842	-0.350168	0.0963193	0.0843869		-0.548928		0.0940002	-2.15108	-2.37028	-0.313605		-0.715004			-0.769278	0.292344
-1.4717	-0.294316	0.0917667	0.0668843		-0.523107		0.0916244	-2.19932	-2.44125	-0.32124		-0.669693			-0.767035	0.298374
-1.42852	-0.239281	0.0763775	0.0546101		-0.498287		0.101141	-2.23727	-2.50774	-0.347642		-0.635018			-0.766163	0.303927
-1.39506	-0.193941	0.0548275	0.0361467		-0.48457		0.136559	-2.26504	-2.55937	-0.376978		-0.640035			-0.768746	0.30848
-1.38711	-0.158184	0.0413666	0.0307638		-0.477573		0.226377	-2.29442	-2.59288	-0.381324		-0.679231			-0.767222	0.315154
-1.39676	-0.138471	0.0255574	0.0277173		-0.469584		0.350148	-2.33367	-2.60646	-0.375836		-0.703072			-0.762042	0.322882
-1.41365	-0.135969	0.0157635	0.0294806		-0.48301		0.464779	-2.37893	-2.62221	-0.357102		-0.741757			-0.762261	0.331159
-1.44141	-0.139837	0.0160214	0.0184217		-0.501083		0.545815	-2.42131	-2.64058	-0.346673		-0.790885			-0.770152	0.338239
-1.46901	-0.167401	0.0271988	-0.0133497		-0.523118		0.570949	-2.45607	-2.66664	-0.341284		-0.83234			-0.787106	0.342275
-1.49152	-0.209869	0.056929	-0.0430829		-0.549389		0.550337	-2.47842	-2.69874	-0.33303		-0.859209			-0.8056	0.344214
-1.51197	-0.25913	0.0769532	-0.0608764		-0.568381		0.526462	-2.48582	-2.7408	-0.317666		-0.880584			-0.822182	0.345942
-1.53327	-0.292141	0.107848	-0.0627089		-0.592043		0.516649	-2.48322	-2.79069	-0.306998		-0.88718			-0.832376	0.349229
-1.56182	-0.318712	0.136518	-0.0693611		-0.611087		0.513247	-2.48559	-2.84215	-0.295521		-0.891425			-0.84259	0.353389
-1.59531	-0.339685	0.155132	-0.0486444		-0.61782		0.530785	-2.50628	-2.89148	-0.294836		-0.91779			-0.852593	0.359822
-1.64189	-0.351749	0.183964	-0.00777385		-0.63083		0.538689	-2.54365	-2.93604	-0.294185		-0.952972			-0.863643	0.367695
-1.68135	-0.366306	0.195952	0.0212134		-0.646462		0.549291	-2.59344	-2.95941	-0.282634		-0.986049			-0.87492	0.37418
-1.71797	-0.379188	0.194725	0.0110312		-0.66762		0.584288	-2.65381	-2.96749	-0.275983		-1.01399			-0.8886	0.379726
-1.75237	-0.386723	0.185282	-0.00722463		-0.685611		0.600662	-2.71156	-2.95826	-0.267261		-1.03943			-0.902248	0.382981
-1.7858	-0.388944	0.190698	-0.00945664		-0.698989		0.591827	-2.76194	-2.95074	-0.264799		-1.03382			-0.911195	0.385673
-1.80664	-0.38409	0.231985	0.00420913		-0.696132		0.581138	-2.81187	-2.96416	-0.276251		-1.02239			-0.91442	0.390732
-1.81933	-0.382976	0.271732	0.0327162		-0.697314		0.591681	-2.86272	-2.99324	-0.294134		-0.980739			-0.913432	0.397594
-1.83104	-0.391432	0.283357	0.0638427		-0.699653		0.608887	-2.90869	-3.03732	-0.318761		-0.942859			-0.917367	0.404301
-1.82688	-0.389727	0.302326	0.0828906		-0.686183		0.615459	-2.95204	-3.09052	-0.337308		-0.921133			-0.920311	0.410902
-1.81304	-0.384671	0.331905	0.0864094		-0.657373		0.60796	-2.98904	-3.14048	-0.346996		-0.909574			-0.921489	0.416436
-1.78988	-0.380665	0.361977	0.0794983		-0.619597		0.60131	-3.02985	-3.1739	-0.346649		-0.912865			-0.921061	0.421043
-1.7715	-0.393654	0.39844	0.0689449		-0.586023		0.601633	-3.0845	-3.19497	-0.358598		-0.920496			-0.924073	0.425844
-1.76405	-0.415798	0.437176	0.0728111		-0.577391		0.601918	-3.15212	-3.20872	-0.375523		-0.919944			-0.930164	0.431327
-1.76413	-0.439503	0.45669	0.0995335		-0.575635		0.601399	-3.20956	-3.222	-0.370126		-0.925647			-0.934899	0.436564
-1.76561	-0.457613	0.465765	0.123514		-0.586431		0.60312	-3.25323	-3.23454	-0.36304		-0.935211			-0.940327	0.440664
-1.76911	-0.480645	0.455462	0.146054		-0.619339		0.581078	-3.30104	-3.24594	-0.366525		-0.935832			-0.953583	0.442978
-1.7652	-0.50782	0.427484	0.166507		-0.658867		0.523835	-3.33929	-3.2625	-0.377832		-0.936889			-0.973057	0.442715
-1.75829	-0.535324	0.416949	0.184047		-0.699301		0.490958	-3.37899	-3.2977	-0.388248		-0.935273			-0.990117	0.445103
-1.74549	-0.546247	0.427117	0.191095		-0.740432		0.501625	-3.42345	-3.31097	-0.397261		-0.929391			-0.99734	0.448716
-1.73753	-0.552392	0.428115	0.184313		-0.768411		0.554551	-3.46958	-3.35325	-0.398762		-0.931662			-1.00446	0.45533
-1.73744	-0.565349	0.435789	0.155779		-0.776634		0.602551	-3.51703	-3.42037	-0.396913		-0.934684			-1.01543	0.46317
-1.73757	-0.579377	0.463284	0.128624		-0.764074		0.620672	-3.57714	-3.48314	-0.395837		-0.947821			-1.02724	0.471241
-1.74192	-0.603335	0.476275	0.123627		-0.736726		0.619743	-3.64639	-3.54042	-0.387807		-0.961435			-1.03984	0.479121
-1.75086	-0.620075	0.487662	0.12743		-0.715023		0.602879	-3.70969	-3.60472	-0.385308		-0.971844			-1.05395	0.486705
-1.75466	-0.63618	0.517405	0.13719		-0.71355		0.584592	-3.77761	-3.67406	-0.381535		-0.986548			-1.0685	0.495447
-1.77028	-0.643767	0.540043	0.138388		-0.726195		0.558904	-3.83754	-3.75424	-0.37698		-0.99237			-1.0864	0.503808
-1.78197	-0.647798	0.562793	0.127404		-0.749526		0.551751	-3.89918	-3.83715	-0.375527		-1.00573			-1.10549	0.51265
-1.78598	-0.658627	0.57846	0.118026		-0.774617		0.55143	-3.96278	-3.89381	-0.371726		-1.00516			-1.12048	0.519993
-1.78891	-0.666059	0.589899	0.088199		-0.782457		0.56341	-4.01447	-3.93235	-0.369489		-0.994347			-1.13066	0.525463
-1.7895	-0.670159	0.604161	0.0737888		-0.781796		0.577397	-4.0606	-3.96719	-0.36333		-0.985729			-1.1363	0.531094
-1.77943	-0.667267	0.61682	0.0755244		-0.777356		0.576551	-4.10408	-3.99477	-0.359967		-0.971897			-1.13859	0.535894
-1.76931	-0.656162	0.626936	0.0610404		-0.787474		0.577076	-4.13673	-4.02642	-0.358613		-0.965428			-1.14351	0.539754
-1.77471	-0.648569	0.619749	0.0446831		-0.802882		0.576762	-4.17273	-4.05804	-0.356722		-0.965883			-1.15383	0.54324
-1.7853	-0.645797	0.601227	0.0434167		-0.823331		0.576856	-4.20679	-4.09932	-0.356942		-0.962384			-1.16584	0.54713
-1.78729	-0.645666	0.596974	0.0443196		-0.82786		0.5769	-4.21221	-4.10847	-0.357242		-0.961966			-1.16825	0.547874

## Sheet: yplus6grp
Fly1	Fly2	Fly3	Fly4	Fly5	Fly6	Fly7	Fly8	Fly9	Fly10	Fly11	Fly12	Fly13			AVG	SEM
-3.75425e-07	-6.04328e-07	-6.85337e-07	-2.43209e-07		-4.45749e-07		-4.00779e-07	-2.32034e-07	-1.14301e-06	-5.40949e-07		-1.99467e-08			-4.69077e-07	9.70291e-08
7.39536e-07	1.2127e-06	1.42049e-06	3.94246e-07		8.58614e-07		6.70458e-07	4.63205e-07	2.46129e-06	1.10858e-06		7.21863e-09			9.33633e-07	2.15053e-07
-1.39729e-06	-2.34364e-06	-2.85013e-06	-5.44641e-07		-1.57637e-06		-9.86118e-07	-8.89425e-07	-5.14485e-06	-2.19584e-06		6.20431e-08			-1.78663e-06	4.65332e-07
2.50246e-06	4.32595e-06	5.51129e-06	4.85344e-07		2.71044e-06		1.07821e-06	1.62881e-06	1.04253e-05	4.18096e-06		-2.9607e-07			3.25527e-06	9.83394e-07
-4.15034e-06	-7.5114e-06	-1.01918e-05	4.5768e-07		-4.20663e-06		-9.46589e-09	-2.7987e-06	-2.0428e-05	-7.57998e-06		9.69512e-07			-5.54491e-06	2.03168e-06
5.89293e-06	1.1605e-05	1.75342e-05	-4.34815e-06		5.13488e-06		-5.12616e-06	4.19404e-06	3.807e-05	1.26052e-05		-2.78004e-06			8.27819e-06	4.07792e-06
-5.84143e-06	-1.44745e-05	-2.70872e-05	1.60946e-05		-2.31443e-06		2.1486e-05	-4.93404e-06	-6.64561e-05	-1.83273e-05		7.13913e-06			-9.47153e-06	7.91195e-06
1.77033e-06	1.5916e-05	4.04776e-05	-4.30563e-05		-8.20707e-06		-6.23035e-05	6.26849e-06	0.00011864	2.65004e-05		-1.66032e-05			7.94032e-06	1.56915e-05
4.14116e-05	3.75997e-05	-1.94635e-05	0.000139925		7.18313e-05		0.000200115	2.13889e-05	-0.000154828	2.58677e-06		4.75812e-05			3.88148e-05	2.98004e-05
-0.000267322	-0.000410963	-0.000270689	-0.000467119		-0.000391743		-0.000620086	-0.000208069	-0.000257017	-0.000299034		-0.000114457			-0.00033065	4.57496e-05
-0.000299937	-0.000732369	-0.000551409	-0.000271015		-0.000269833		1.39722e-05	-0.000613641	-0.00138772	-0.000668574		-0.000106165			-0.000488669	0.000126905
0.000614622	0.00244099	0.00271229	-0.000548807		0.00123744		-0.00195318	0.00121137	0.00829204	0.00274943		-0.00102766			0.00157285	0.000903341
0.0414353	0.0761079	0.0604883	0.0526369		0.0540947		0.0567974	0.0447406	0.107491	0.0640137		0.011432			0.0569238	0.00779764
0.13054	0.227052	0.157408	0.203277		0.16045		0.208029	0.159419	0.247338	0.191297		0.0718081			0.175662	0.0161532
0.254117	0.390986	0.297866	0.438473		0.300326		0.409117	0.308788	0.396442	0.380468		0.197736			0.337432	0.0244425
0.388559	0.536347	0.468096	0.730087		0.456876		0.647556	0.464298	0.552797	0.607829		0.356693			0.520914	0.0369959
0.518132	0.691149	0.652235	1.04542		0.623385		0.90593	0.599598	0.706686	0.861277		0.536695			0.71405	0.0541454
0.651441	0.845905	0.852395	1.35478		0.776797		1.16944	0.720248	0.850293	1.12414		0.737355			0.90828	0.0724466
0.795456	0.993441	1.06124	1.62159		0.919586		1.42468	0.837909	0.978147	1.36951		0.937048			1.09386	0.0880643
0.941277	1.1426	1.27836	1.82165		1.02072		1.64028	0.944512	1.09353	1.59854		1.12654			1.2608	0.0995926
1.07115	1.27185	1.48939	1.96567		1.07849		1.85469	1.04808	1.20806	1.81338		1.26343			1.40642	0.111179
1.1665	1.38607	1.6727	2.09826		1.12308		2.01896	1.1435	1.31279	2.0033		1.37593			1.53011	0.122252
1.22417	1.50013	1.81433	2.24688		1.1567		2.11463	1.23944	1.42537	2.18592		1.46411			1.63717	0.132725
1.23541	1.61914	1.91539	2.42183		1.17894		2.18875	1.33278	1.53067	2.32595		1.50873			1.72576	0.14474
1.23764	1.73099	1.97404	2.61633		1.20136		2.26396	1.41745	1.62199	2.40596		1.54096			1.80107	0.156476
1.26447	1.82399	2.02875	2.8217		1.23524		2.35981	1.49724	1.69097	2.47314		1.55747			1.87528	0.169139
1.29567	1.91715	2.08999	3.02497		1.26064		2.44123	1.56349	1.78332	2.50711		1.5448			1.94284	0.181724
1.3116	2.01029	2.1866	3.18501		1.27266		2.47211	1.61573	1.87378	2.49931		1.55521			1.99823	0.190779
1.32917	2.10249	2.3037	3.31426		1.28815		2.46082	1.68249	1.97222	2.48851		1.59525			2.05371	0.196478
1.35827	2.17949	2.42555	3.41175		1.30664		2.4453	1.75753	2.06169	2.47792		1.64816			2.10723	0.199917
1.3973	2.23707	2.52426	3.49646		1.31242		2.44557	1.83912	2.14923	2.47475		1.71017			2.15864	0.203057
1.44955	2.27534	2.57997	3.58866		1.31823		2.45071	1.92447	2.22073	2.47662		1.77541			2.20597	0.20588
1.49681	2.30582	2.59029	3.69203		1.34591		2.45214	2.01861	2.27735	2.47786		1.82175			2.24786	0.208526
1.55521	2.33466	2.60067	3.80561		1.40301		2.45087	2.09475	2.34596	2.47824		1.81557			2.28846	0.212129
1.61955	2.40012	2.65274	3.94976		1.48118		2.45207	2.18033	2.42213	2.47736		1.80848			2.34437	0.218464
1.7161	2.53263	2.75433	4.11291		1.59294		2.44869	2.27796	2.51191	2.47682		1.81278			2.42371	0.225368
1.83456	2.70168	2.88313	4.31345		1.72743		2.50025	2.38573	2.62369	2.4768		1.81914			2.52659	0.235729
1.96812	2.88461	3.04081	4.54127		1.90369		2.64482	2.51382	2.73961	2.4806		1.84104			2.65584	0.247566
2.13712	3.07673	3.20321	4.77903		2.15103		2.84136	2.66986	2.87132	2.51286		1.88875			2.81313	0.257145
2.2963	3.27651	3.35869	5.0059		2.44426		3.10492	2.85029	3.06317	2.58791		1.97902			2.9967	0.264204
2.4441	3.49373	3.49244	5.2188		2.75689		3.40525	3.05594	3.26881	2.6917		2.10864			3.19363	0.269397
2.55567	3.72821	3.63619	5.44345		3.08515		3.75602	3.27141	3.48867	2.83672		2.28904			3.40905	0.275944
2.63101	3.97903	3.80422	5.67286		3.43543		4.09103	3.49485	3.71163	3.00218		2.50729			3.63295	0.283888
2.68863	4.23831	3.99959	5.91057		3.79915		4.36674	3.73024	3.93183	3.18224		2.75522			3.86025	0.292536
2.75937	4.53535	4.20992	6.14483		4.17171		4.64298	3.97139	4.14423	3.35383		3.01709			4.09507	0.30236
2.85271	4.83528	4.45137	6.32375		4.5521		4.91071	4.22056	4.33224	3.50661		3.29949			4.32848	0.308507
2.95688	5.16568	4.70439	6.45819		4.94135		5.21195	4.47368	4.52256	3.63828		3.60173			4.56747	0.314597
3.04461	5.51161	4.95032	6.5498		5.341		5.56737	4.70823	4.70864	3.76811		3.89954			4.80492	0.323966
3.13822	5.85809	5.18875	6.64434		5.73723		5.91403	4.98525	4.88948	3.91653		4.22434			5.04963	0.334736
3.26555	6.1982	5.40553	6.74949		6.12921		6.14753	5.2819	5.06905	4.09416		4.5486			5.28892	0.342132
3.42864	6.54357	5.61204	6.86532		6.51738		6.22151	5.59388	5.24739	4.29806		4.87038			5.51982	0.345151
3.57173	6.88494	5.81158	6.9726		6.9034		6.20583	5.9255	5.42251	4.51088		5.17064			5.73796	0.350829
3.71656	7.23628	6.01614	7.07621		7.30029		6.21439	6.26402	5.61129	4.72176		5.46091			5.96178	0.361607
3.8639	7.58217	6.22335	7.15325		7.71135		6.32021	6.61287	5.80108	4.95388		5.72182			6.19439	0.375446
4.02808	7.9252	6.43805	7.21594		8.10207		6.51574	6.97417	5.99654	5.21991		5.97462			6.43903	0.388454
4.20183	8.27525	6.64856	7.277		8.4931		6.81003	7.33538	6.20075	5.5117		6.24438			6.6998	0.402185
4.39227	8.62837	6.84661	7.37021		8.85506		7.04815	7.69825	6.40929	5.82045		6.52184			6.95905	0.414939
4.58203	8.99045	7.04386	7.52263		9.20317		7.08806	8.00571	6.62236	6.11115		6.79584			7.19653	0.428756
4.74696	9.35246	7.24251	7.70854		9.54211		7.14335	8.33424	6.82983	6.35448		7.05599			7.43105	0.447523
4.88367	9.7284	7.44068	7.89171		9.88479		7.3183	8.6938	7.06662	6.5916		7.27988			7.67795	0.469729
4.98613	10.1131	7.63891	8.06918		10.2141		7.56941	9.04904	7.3171	6.81507		7.48074			7.92528	0.493919
5.07036	10.4865	7.82919	8.25259		10.5443		7.84097	9.395	7.57928	7.04067		7.6918			8.17307	0.518505
5.15665	10.8578	7.99796	8.42869		10.8779		8.15961	9.74144	7.85836	7.26139		7.91833			8.42582	0.542987
5.25921	11.2198	8.16897	8.5373		11.2185		8.49545	10.0836	8.14922	7.46605		8.16337			8.67614	0.566704
5.36513	11.5566	8.3281	8.6429		11.5595		8.79286	10.4289	8.43994	7.67522		8.4258			8.92149	0.589724
5.50337	11.8863	8.5011	8.79314		11.9261		9.06255	10.7824	8.72402	7.92104		8.72854			9.18285	0.610745
5.66826	12.1861	8.68868	8.96379		12.3041		9.22562	11.147	9.0177	8.1815		9.07457			9.44572	0.629074
5.85166	12.4502	8.89397	9.13636		12.6871		9.32048	11.503	9.34084	8.45149		9.43987			9.70749	0.644746
6.03001	12.6703	9.1012	9.29295		13.075		9.42631	11.852	9.66372	8.71416		9.80869			9.96344	0.659997
6.20331	12.8534	9.31566	9.46039		13.4609		9.57845	12.2033	9.97025	8.95599		10.1652			10.2167	0.67474
6.39612	13.0218	9.54414	9.64449		13.8495		9.76422	12.5463	10.2924	9.14239		10.4962			10.4698	0.68857
6.59119	13.179	9.76313	9.80838		14.2252		9.95204	12.8994	10.6322	9.32709		10.8021			10.718	0.702538
6.78409	13.3279	9.98848	9.97946		14.5932		10.1252	13.2416	10.9755	9.5046		11.0665			10.9586	0.716341
6.9609	13.4722	10.2089	10.123		14.9487		10.3198	13.5606	11.3522	9.7022		11.2957			11.1944	0.729918
7.1479	13.6358	10.4196	10.2628		15.2914		10.5323	13.8704	11.7071	9.91855		11.5142			11.43	0.742556
7.32407	13.8041	10.6436	10.383		15.6264		10.6662	14.1763	12.0525	10.1477		11.747			11.6571	0.756904
7.48949	13.9733	10.829	10.5182		15.956		10.766	14.4908	12.3862	10.4053		11.9832			11.8797	0.772657
7.64629	14.1432	10.9621	10.639		16.2598		10.8546	14.8156	12.7129	10.6606		12.218			12.0912	0.78972
7.77455	14.3163	11.0825	10.7453		16.5549		10.9485	15.1322	13.0175	10.8911		12.4278			12.2891	0.809057
7.86448	14.4884	11.2075	10.8843		16.8162		11.0084	15.4511	13.2717	11.0859		12.5741			12.4652	0.829158
7.93508	14.6534	11.3353	11.0441		17.0688		11.0117	15.7664	13.4895	11.2147		12.6525			12.6171	0.851324
8.00102	14.8245	11.4406	11.2124		17.3285		10.985	16.0787	13.7033	11.3323		12.7085			12.7615	0.875675
8.07734	14.9986	11.5556	11.3665		17.5965		10.9694	16.3852	13.9274	11.4436		12.7721			12.9092	0.900271
8.17371	15.1704	11.6989	11.489		17.871		10.9689	16.6727	14.1656	11.514		12.8159			13.054	0.924314
8.29615	15.3483	11.8807	11.5838		18.1534		10.969	16.9749	14.4134	11.5558		12.8584			13.2034	0.9491
8.43275	15.5383	12.0828	11.6674		18.436		10.9681	17.289	14.6601	11.5839		12.9088			13.3567	0.974631
8.57419	15.749	12.2871	11.7633		18.7116		10.9689	17.5906	14.9082	11.6137		12.9595			13.5126	0.999671
8.71136	15.966	12.4919	11.8954		18.9823		10.9709	17.8654	15.1538	11.6494		13.0364			13.6723	1.02301
8.82873	16.1961	12.7063	12.0621		19.2478		11.0703	18.0952	15.3969	11.6904		13.1428			13.8437	1.0417
8.97293	16.4281	12.8849	12.2631		19.497		11.2257	18.2614	15.643	11.7341		13.2779			14.0188	1.05331
9.13172	16.6501	13.0241	12.4983		19.754		11.3768	18.4322	15.8876	11.7607		13.4156			14.1931	1.06515
9.28214	16.8637	13.1593	12.7498		20.0168		11.5245	18.6092	16.0989	11.7828		13.5726			14.366	1.07739
9.42482	17.0597	13.285	12.9799		20.2875		11.6542	18.7824	16.3361	11.8223		13.7373			14.5369	1.09107
9.5721	17.2735	13.3976	13.1985		20.5688		11.7724	18.9555	16.5913	11.8711		13.9113			14.7112	1.10651
9.72302	17.4845	13.527	13.3745		20.8436		11.8919	19.1435	16.8463	11.9259		14.1179			14.8878	1.1221
9.87932	17.6708	13.6757	13.5121		21.1105		12.012	19.3423	17.1204	11.979		14.3255			15.0628	1.13765
10.0355	17.8422	13.8367	13.6516		21.3633		12.1191	19.549	17.3931	12.0257		14.5617			15.2378	1.15268
10.1969	18.0155	14.024	13.7795		21.6075		12.2196	19.758	17.6615	12.0729		14.8179			15.4153	1.16711
10.3576	18.1763	14.2265	13.9143		21.8571		12.3303	19.9494	17.9252	12.1183		15.0709			15.5926	1.18047
10.4919	18.268	14.4319	14.0858		22.0964		12.4413	20.1065	18.1784	12.1566		15.327			15.7584	1.19111
10.6079	18.3217	14.6321	14.2778		22.3241		12.5346	20.2733	18.4226	12.1921		15.591			15.9177	1.20201
10.7097	18.3709	14.8182	14.4518		22.5387		12.5985	20.4498	18.6465	12.2236		15.8263			16.0634	1.21465
10.8047	18.4051	14.9753	14.5814		22.7609		12.6026	20.6173	18.8434	12.2523		16.109			16.1952	1.23005
10.906	18.4205	15.0852	14.6891		22.986		12.58	20.7895	19.0449	12.2796		16.3963			16.3177	1.2475
11.0066	18.4233	15.1688	14.8025		23.2166		12.5757	20.9666	19.246	12.3071		16.6488			16.4362	1.26533
11.0696	18.423	15.2257	14.9092		23.4464		12.5758	21.13	19.4528	12.3248		16.8877			16.5445	1.28544
11.0904	18.4174	15.2805	14.9981		23.6778		12.5758	21.2459	19.6694	12.3355		17.1369			16.6428	1.30689
11.0925	18.4159	15.2936	15.0142		23.7244		12.5759	21.2661	19.7104	12.3376		17.1874			16.6618	1.31117
