# Supplementary material for: How spatial release from masking may fail to function in a highly directional auditory system
Source: eLife. 2017 Apr 25;6:e20731. doi: 10.7554/eLife.20731 (PMC5443663; doi:10.7554/eLife.20731)
Supplement: Figure 4—source data 4. — The target signal was presented at 76 dB SPL while the masker intensity was varied to achieve three SNRs (−6, 0, +6 dB). Masker presentation started and ended 0.5 and 4.5 s after the onset of data acquisition respectively. Signal presentation started and ended 1.0 and 4.0 s after the onset of data acquisition, respectively. Data plotted in Figure 4A (right). DOI: http://dx.doi.org/10.7554/eLife.20731.013 [file elife-20731-fig4-data4.xlsx]

## Sheet: minus6sep
Time	Fly1	Fly2	Fly3	Fly4	Fly5	Fly6	Fly7	Fly8
9.04816	1.38578e-05	-1.63601e-05	-4.16441e-06	-3.27141e-06	9.02144e-06	-1.60169e-06	-2.80434e-06	-8.02422e-06
20.6654	-1.87275e-05	1.33592e-05	6.2833e-06	6.44513e-06	-1.25465e-05	-1.00804e-05	5.22044e-07	2.03773e-05
32.0169	1.91787e-05	-4.49926e-06	-7.1226e-06	-8.72451e-06	1.32214e-05	2.31726e-05	2.89441e-06	-3.08724e-05
43.516	-1.32088e-05	-9.61572e-06	5.85803e-06	8.95002e-06	-9.62162e-06	-3.37525e-05	-6.74176e-06	3.51154e-05
54.9464	1.90347e-07	2.63183e-05	-2.04577e-06	-6.18522e-06	1.20074e-06	3.71231e-05	9.87418e-06	-2.903e-05
66.3754	1.83368e-05	-4.09337e-05	-4.06549e-06	1.32719e-07	1.11548e-05	-2.91086e-05	-1.09132e-05	1.03952e-05
77.8637	-3.82905e-05	4.75523e-05	1.13308e-05	8.49613e-06	-2.48318e-05	7.71108e-06	8.62544e-06	1.96137e-05
89.2613	5.33903e-05	-4.05494e-05	-1.77286e-05	-1.78046e-05	3.56691e-05	2.52905e-05	-2.40843e-06	-5.54097e-05
100.751	-5.64027e-05	1.66433e-05	2.06913e-05	2.48687e-05	-3.87443e-05	-6.3374e-05	-7.23805e-06	8.70756e-05
112.171	4.12356e-05	2.29943e-05	-1.77615e-05	-2.63155e-05	2.97523e-05	9.55392e-05	1.84233e-05	-0.000101971
123.626	-5.51534e-06	-7.12798e-05	7.4853e-06	1.92976e-05	-6.74654e-06	-0.000108226	-2.79358e-05	8.79504e-05
135.079	-4.7041e-05	0.000115187	9.66728e-06	-2.69456e-06	-2.82036e-05	8.89173e-05	3.17976e-05	-3.77555e-05
146.511	0.00010536	-0.000137754	-3.06597e-05	-2.17791e-05	6.80469e-05	-3.08897e-05	-2.63146e-05	-4.64396e-05
157.976	-0.00015175	0.000122279	4.98625e-05	4.89794e-05	-0.000101097	-6.2048e-05	9.46912e-06	0.000149833
169.408	0.000165236	-5.81912e-05	-5.99092e-05	-7.06718e-05	0.000113122	0.000172461	1.76837e-05	-0.000244817
180.864	-0.000127411	-5.27483e-05	5.35086e-05	7.70769e-05	-9.11856e-05	-0.000269599	-5.00938e-05	0.000295135
192.307	2.9854e-05	0.000191893	-2.599e-05	-5.95948e-05	2.86463e-05	0.000314426	7.87865e-05	-0.000264768
203.753	0.000118782	-0.000323079	-2.19919e-05	1.42631e-05	6.99139e-05	-0.000269614	-9.23176e-05	0.000130446
215.204	-0.000288619	0.000397767	8.24556e-05	5.49377e-05	-0.000185578	0.000113139	7.9689e-05	0.000104986
226.645	0.000429975	-0.000366593	-0.00013978	-0.000134134	0.000285623	0.000147726	-3.43283e-05	-0.000402641
238.098	-0.000482223	0.00019604	0.000172895	0.000200209	-0.000329043	-0.000466672	-4.18021e-05	0.000685936
249.541	0.000390133	0.000113386	-0.000160269	-0.000224905	0.000277239	0.000758057	0.000135335	-0.00085127
260.989	-0.00012516	-0.000513106	8.71336e-05	0.000182422	-0.000108317	-0.000910056	-0.000221364	0.000792453
272.436	-0.000293604	0.000903113	4.65993e-05	-5.93353e-05	-0.000168442	0.000812265	0.000267193	-0.000436164
283.882	0.000786216	-0.00114494	-0.00022018	-0.000135631	0.000502863	-0.000394152	-0.000240262	-0.000219225
295.331	-0.00121408	0.00109328	0.00039047	0.000365378	-0.000804131	-0.00033441	0.000119274	0.00107334
306.776	0.00140307	-0.00064323	-0.000497442	-0.000565372	0.000954906	0.00125328	9.38414e-05	-0.0019157
318.224	-0.00118822	-0.0002167	0.000477763	0.000654337	-0.000840146	-0.00212695	-0.000364654	0.00245155
329.67	0.000473642	0.00136155	-0.000285171	-0.000555098	0.000387092	0.00263567	0.000623802	-0.00236671
341.117	0.000705708	-0.00251589	-8.64436e-05	0.000222761	0.000391995	-0.00244745	-0.000775311	0.0014268
352.564	-0.00213976	0.0032857	0.00058401	0.000326262	-0.00136638	0.00132608	0.000718515	0.000406116
364.011	0.00343783	-0.00324462	-0.00108863	-0.000993774	0.00227712	0.000739623	-0.000384341	-0.0028721
375.458	-0.00408461	0.00206777	0.0014284	0.00159763	-0.00277156	-0.00342122	-0.000222057	0.00536993
386.905	0.00357045	0.000313477	-0.00141617	-0.00189918	0.00249338	0.00600894	0.0009894	-0.00702728
398.352	-0.00158986	-0.00358183	0.00090758	0.00166393	-0.00122728	-0.00752568	-0.00170775	0.00690383
409.799	-0.00175524	0.00698186	0.000125513	-0.000755174	-0.000969116	0.00700103	0.00211467	-0.00432207
421.245	0.00582198	-0.00939175	-0.00153445	-0.000777762	0.00368049	-0.00382704	-0.00196824	-0.000669934
432.692	-0.00938081	0.00957067	0.00300536	0.00267796	-0.0060149	-0.00161641	0.00125384	0.00724489
444.139	0.0111037	-0.00654151	-0.00402198	-0.0043723	0.00724596	0.00805858	-4.85543e-05	-0.0137094
455.586	-0.00998713	4.50909e-05	0.00415127	0.0052852	-0.00686316	-0.0137719	-0.00154766	0.0188009
467.033	0.00621559	0.00924647	-0.00284548	-0.00477671	0.00554017	0.0191765	0.00424873	-0.0210729
478.48	0.000519844	-0.0194726	8.69759e-05	0.0029195	-0.00197563	-0.025479	-0.00834191	0.0152952
489.927	-0.0139652	0.0266592	0.00268872	-0.000534995	-0.0112083	0.018027	0.00719908	-0.011258
501.374	0.0218696	-0.0280999	-0.0101445	-0.00927608	0.00949807	-0.0144886	-0.011167	-0.0171827
512.821	-0.0413536	0.0203687	0.00877326	0.0094736	-0.0351006	-0.0160537	0.000313887	0.0336907
524.267	0.0432445	-0.00646743	-0.0201237	-0.0220791	0.0295129	0.0364839	0.00594618	-0.0972185
535.714	-0.0646671	-0.0229846	0.00779586	0.0136364	-0.0721666	-0.129778	-0.0469319	0.253763
547.161	0.0956281	0.0898311	0.0463878	0.0163988	0.168504	0.646307	0.244971	0.510109
558.608	0.694169	-0.0125396	0.213452	0.259	1.23745	1.274	0.668553	1.03506
570.055	0.828468	0.119151	0.631992	0.847395	2.1448	1.07217	0.818601	2.07246
581.502	1.2852	0.0393127	1.05179	1.18768	2.79184	1.87928	1.04252	2.20562
592.949	1.73121	0.416025	1.62265	1.34771	3.27936	2.84143	1.25823	2.30062
604.396	1.95856	0.389131	2.01339	1.51109	3.51266	3.13548	1.09458	2.24293
615.842	2.51066	-0.525593	2.18788	1.87908	3.53777	3.46229	1.31952	1.92192
627.289	2.81413	0.426015	2.49758	2.26363	3.63531	3.93519	1.90398	2.10364
638.736	2.96533	1.06693	2.95878	2.43149	4.0608	4.03504	2.02573	1.9737
650.183	3.0387	1.02558	3.24083	2.71915	4.11092	4.02078	2.172	1.74515
661.63	3.27623	1.87711	2.94078	2.9758	4.06841	4.27236	2.22177	1.82605
673.077	3.56476	2.17882	3.44561	3.09552	4.09467	4.13336	2.4344	1.52124
684.524	3.72484	2.5167	4.27926	3.31281	4.00573	4.16066	2.77258	1.16041
695.971	3.96243	2.68037	4.2739	3.36226	4.15699	4.41122	2.49965	0.858311
707.418	4.03498	2.50233	4.45587	3.38002	4.03063	4.52887	2.75845	0.384362
718.864	4.16649	2.70936	4.50458	3.67852	3.67146	4.50457	3.18123	0.398212
730.311	4.34382	2.77377	4.76024	3.66353	3.72382	4.35784	3.35177	0.0169406
741.758	4.33602	2.92961	5.03825	3.61574	3.75812	4.41568	3.52676	-0.0470972
753.205	4.60925	3.01335	4.96632	3.52464	3.37576	4.27252	3.40477	0.102507
764.652	4.81579	2.96022	5.4124	3.30918	2.99817	4.41502	3.60874	-0.395246
776.099	4.59167	3.29111	5.31085	3.40901	2.65225	4.33083	3.52449	-0.212889
787.546	4.70084	3.31408	5.45165	3.07398	2.67771	4.16308	3.41006	-0.364482
798.993	4.77587	3.34023	5.46953	2.82552	3.01738	4.27396	3.41462	-0.202738
810.44	4.74094	3.19197	4.83858	2.74343	2.67928	3.67003	3.368	-0.155635
821.886	4.81819	2.80356	5.41629	2.28894	2.46849	4.04724	3.19799	-0.44679
833.333	4.71318	3.21536	5.63416	2.10926	2.72173	4.29723	2.34312	0.0800872
844.78	4.85001	3.17633	5.09218	1.77965	2.20895	3.77795	1.81193	-0.0668227
856.227	4.89355	2.91438	4.57627	1.425	1.89401	4.11538	0.998811	0.303502
867.674	4.78593	3.07912	4.37313	1.18598	2.12669	3.99687	0.54836	0.381193
879.121	4.56174	2.80605	4.16787	1.06666	1.30138	3.82001	0.29588	-0.137848
890.568	4.6174	2.7413	3.14245	1.01282	0.994722	3.86428	-0.962102	0.0692173
902.015	4.69653	2.6138	2.79517	0.677279	1.88135	3.77815	-1.17256	-0.0295878
913.462	4.2556	2.27402	2.43752	0.80457	1.68291	3.57028	-1.27739	0.00917469
924.908	4.21508	2.30068	1.83485	0.724139	1.38698	3.44361	-1.4417	-0.00196017
936.355	3.66891	2.07981	1.82525	0.504757	1.63065	3.72103	-0.907489	-0.00359015
947.802	3.07946	1.86203	1.46357	0.635453	1.29637	3.46807	-0.977532	0.00355663
959.249	3.10013	1.78178	1.17314	0.366773	1.34875	3.33582	-0.933297	-0.0188008
970.696	2.80398	1.53746	1.03112	0.343171	1.64951	3.43796	-0.637996	0.0453284
982.143	2.54641	1.28625	1.09231	0.296204	1.37398	3.29751	-0.450827	-0.109994
993.59	2.32312	0.934625	1.13403	0.0888994	1.33498	3.35712	-0.0230792	0.281336
1005.04	2.21322	0.87201	1.01785	0.280285	1.613	3.25431	0.0416037	0.314002
1016.48	2.00901	0.800042	1.24077	0.0381759	1.08085	3.50837	-0.0826164	0.329461
1027.93	1.63363	0.57984	1.32742	-0.0717149	0.486781	3.46239	0.280591	0.564134
1039.38	1.32945	0.582876	1.33738	0.28599	1.12027	2.82415	0.363557	0.507177
1050.82	1.16246	0.233045	1.27998	0.130178	1.26775	3.2952	0.232572	0.58766
1062.27	1.28299	0.165753	1.1869	0.161919	0.992453	3.62435	0.407914	0.355728
1073.72	1.22263	0.223838	1.31903	0.262508	1.29279	3.31138	0.330456	0.598106
1085.16	1.15699	0.103103	1.27491	-0.0842849	1.32613	3.46786	0.16676	0.561215
1096.61	1.27609	0.299798	1.20468	0.0820714	1.59291	3.48938	-0.150641	0.327107
1108.06	1.37642	0.0979496	1.14064	0.0880733	1.62881	3.2489	-0.439599	0.458648
1119.51	1.42809	0.169729	1.00256	-0.172137	1.36902	3.17865	-0.0678143	0.287014
1130.95	1.58015	0.362091	1.07545	-0.0177835	1.3443	3.34024	0.0584254	0.354125
1142.4	1.97531	0.283861	1.02154	-0.166411	1.10933	3.54395	-0.0454366	0.261298
1153.85	1.82125	0.450414	1.0406	-0.311588	1.04201	3.5914	0.028903	0.367783
1165.29	1.72931	0.360316	1.28502	-0.215079	1.41496	3.55121	-0.0162202	0.360414
1176.74	2.02928	0.354352	1.27908	-0.166816	1.6706	3.44435	0.00633774	0.252135
1188.19	1.70561	0.321264	1.33279	-0.114314	1.60198	3.36154	0.003392	0.57477
1199.63	1.69286	0.197866	1.51997	0.0774177	1.51936	3.47176	-0.00719927	0.271563
1211.08	2.07243	0.467399	1.60766	-0.00539578	1.52688	3.43369	0.00869657	0.40295
1222.53	1.99668	0.517421	1.63474	-0.0629784	1.89597	3.3126	-0.00841444	0.253647
1233.97	1.89087	0.317085	1.63593	0.187171	1.78764	3.43836	0.0064064	-0.0584073
1245.42	2.02448	0.338897	1.77732	-0.160569	1.77474	3.57361	-0.00335226	0.0568192
1256.87	1.96963	0.460714	1.82793	-0.268193	1.95447	3.37557	0.000259637	-0.488532
1268.31	1.89525	0.396372	1.83944	0.0408918	1.09671	3.31554	0.0020374	-0.101051
1279.76	1.77178	0.280737	1.91733	-0.0145341	1.20883	3.60611	-0.0031724	-0.302243
1291.21	1.52921	0.338602	1.9197	-0.00071352	1.76616	3.37118	0.00318765	-0.360109
1302.66	1.70083	0.437303	1.93971	0.0131889	1.34908	3.23468	-0.00240753	0.226858
1314.1	1.85236	0.404439	2.00704	-0.0215717	1.3211	3.37365	0.00126564	-0.546373
1325.55	1.65261	0.362827	2.05991	0.0247558	1.45712	3.20949	-0.00015398	-0.147959
1337	1.20263	0.48206	1.9331	-0.020919	1.13646	3.30858	-0.000664094	0.0551994
1348.44	1.2747	0.290397	1.94332	0.0117621	0.875683	3.43686	0.00107764	-0.0424235
1359.89	1.60633	0.149784	1.99374	0.0101697	0.922852	3.30455	-0.00110706	0.559274
1371.34	1.57201	0.386978	2.08165	-0.127959	1.0327	3.29128	0.000859204	-0.0134845
1382.78	1.53353	0.414982	2.27953	-0.00314382	1.24667	3.30868	-0.00047607	0.244505
1394.23	1.33175	0.431795	2.09079	0.126224	1.48465	3.1867	9.038e-05	0.589386
1405.68	1.34143	0.487247	2.15083	0.00271786	1.36204	3.22424	0.00020359	0.235176
1417.12	1.19031	0.4023	2.35725	-0.0879215	1.17813	3.1731	-0.000361497	0.352458
1428.57	0.879457	0.42916	2.20723	-0.00650079	1.50349	3.0416	0.000385048	0.313149
1440.02	0.862685	0.308768	2.31028	0.0394743	1.42413	3.14124	-0.000308087	0.649558
1451.47	0.668387	0.188615	2.32542	-0.029542	1.25916	3.08085	0.000178928	0.661787
1462.91	0.666613	0.42949	2.34109	-0.0118638	1.66776	2.86852	-4.43496e-05	0.488476
1474.36	0.637413	0.238523	2.36138	-0.00718663	1.51989	3.01839	-6.13335e-05	0.720288
1485.81	0.466727	0.31093	1.92986	0.088857	1.32909	3.08409	0.00012095	0.75907
1497.25	0.588434	0.363902	1.65611	0.0254243	1.49451	3.01216	-0.000133593	0.82334
1508.7	0.4902	0.125457	0.877041	-0.117119	1.51993	3.49753	0.000110039	0.671107
1520.15	0.312163	0.667185	0.150746	0.057571	1.40102	2.96818	-6.66853e-05	0.590563
1531.59	0.428374	0.00572852	0.280853	0.0512795	1.40424	2.35816	1.99073e-05	0.534703
1543.04	0.542858	0.79171	-0.0725061	-0.0153222	1.61301	3.0934	1.79162e-05	0.498151
1554.49	0.514294	2.30651	-0.32086	0.00156678	1.69197	3.26331	-4.02334e-05	0.736174
1565.93	0.52147	0.723029	-0.370652	-0.00781288	1.64626	3.37703	4.61921e-05	0.556198
1577.38	0.667991	0.382149	-0.562823	-0.0426692	1.78057	3.55247	-3.91688e-05	0.326695
1588.83	0.687828	0.568777	-0.32989	-0.0506142	1.98832	3.42735	2.46969e-05	0.418486
1600.27	0.621807	0.344499	-0.208601	0.0762367	1.75264	3.6276	-8.48895e-06	0.391928
1611.72	0.7429	0.625418	-0.252788	-0.0355088	1.76122	3.43314	-5.00326e-06	0.414571
1623.17	0.760451	0.464014	-0.268667	-0.0788744	1.90092	3.40676	1.33011e-05	0.419455
1634.62	0.66435	0.75927	-0.138751	-0.0100516	1.79964	3.63063	-1.59197e-05	0.0592807
1646.06	0.675308	0.767372	-0.00299705	0.0377618	1.91448	3.63937	1.38976e-05	-0.0545342
1657.51	0.512508	0.752191	0.192889	0.107223	1.87976	3.73847	-9.0939e-06	0.042493
1668.96	0.565247	0.746005	0.33195	-0.034231	2.2138	3.52608	3.49667e-06	-0.0375229
1680.4	0.697006	0.900623	0.194367	-0.102456	2.3012	3.62177	1.30011e-06	0.024632
1691.85	0.523949	1.08219	0.600741	0.0338778	1.87718	3.71771	-4.36726e-06	-0.0211048
1703.3	0.614232	1.04656	0.733984	0.121072	2.24933	3.3425	5.4682e-06	0.00441841
1714.74	0.654991	1.5913	0.552961	0.0508346	2.43915	3.58331	-4.91497e-06	0.00899624
1726.19	0.560293	1.41834	0.89551	0.242045	2.47097	3.97264	3.33115e-06	-0.0498672
1737.64	0.650156	1.37151	1.13331	0.397948	2.36327	3.59715	-1.40458e-06	0.421111
1749.08	0.666774	1.70279	1.10059	0.45992	1.90118	3.51344	-2.95366e-07	0.43855
1760.53	0.66523	1.88055	0.896497	0.647266	2.38294	3.77274	1.42181e-06	0.456036
1771.98	0.668718	2.0916	1.08544	0.492871	2.05371	3.55668	-1.87104e-06	0.792194
1783.42	0.678296	1.85213	1.48609	0.492731	1.81899	3.51752	1.733e-06	0.406712
1794.87	0.696662	2.22553	1.73437	0.585452	2.41224	3.85865	-1.21473e-06	0.402674
1806.32	0.604929	2.819	2.02647	0.51041	2.01006	3.62026	5.54224e-07	0.380076
1817.77	0.648509	2.85005	2.38308	0.591319	2.61495	3.35433	4.69037e-08	0.15819
1829.21	0.660543	2.11394	2.50779	0.604742	2.86611	3.62634	-4.5871e-07	0.420601
1840.66	0.57163	2.07072	2.50436	0.726148	2.66814	3.49492	6.38022e-07	0.192977
1852.11	0.670252	2.53005	3.13313	0.888202	3.1536	3.60928	-6.09857e-07	0.358935
1863.55	0.551849	2.49749	3.41634	1.07078	2.42639	3.78006	4.40959e-07	0.431612
1875	0.446879	2.78355	3.76609	1.05779	2.33935	3.30564	-2.14905e-07	0.00858915
1886.45	0.609648	2.374	4.28433	0.96688	2.68448	2.8436	3.42432e-09	0.418181
1897.89	0.692768	2.5006	4.20767	1.14354	2.58091	2.52714	1.46793e-07	0.153042
1909.34	0.762433	3.01964	4.33794	1.02202	3.14683	2.82159	-2.16936e-07	0.180588
1920.79	0.770691	2.87699	4.24645	1.0145	3.08929	3.14831	2.13432e-07	0.371894
1932.23	0.801862	2.74107	4.50727	0.964027	3.14564	3.17578	-1.59212e-07	0.060793
1943.68	0.830234	2.71624	4.51332	1.12669	3.22076	3.61585	8.22385e-08	0.380295
1955.13	0.781479	2.51457	4.13854	1.36538	2.31182	3.69567	-8.27872e-09	0.176628
1966.58	0.815061	2.04449	4.54859	0.460012	2.92411	3.61838	-4.6257e-08	0.365335
1978.02	0.797262	2.53728	4.55436	-0.118975	3.27028	3.68873	7.36017e-08	0.152855
1989.47	0.777652	2.84614	4.38354	0.429066	2.8852	3.96991	-7.44801e-08	0.155052
2000.92	0.669219	2.62723	4.54077	1.05339	2.78865	3.98806	5.7032e-08	0.470506
2012.36	0.630977	2.84982	4.67121	1.10726	1.26152	3.75596	-3.10407e-08	-0.163712
2023.81	0.673334	2.82108	4.46082	0.755226	2.38576	4.04161	5.41466e-09	0.113295
2035.26	0.451821	2.92665	4.27104	0.822705	3.92477	3.67119	1.40187e-08	-0.209976
2046.7	0.396243	3.04306	4.48643	1.16576	2.95769	3.33834	-2.45522e-08	-0.473287
2058.15	0.611239	2.98148	4.39706	1.24176	3.23802	3.39651	2.59212e-08	0.114309
2069.6	0.812576	2.97184	3.98772	1.08065	3.21707	3.503	-2.04687e-08	-0.0481647
2081.04	0.82517	2.89034	3.45945	1.12134	2.86953	3.15295	1.20528e-08	0.00814345
2092.49	0.898264	3.16836	3.4973	1.09077	3.42407	2.47472	-2.80449e-09	0.0173526
2103.94	0.870483	2.71923	3.65774	0.486272	3.49774	2.99873	-4.54574e-09	-0.0317615
2115.38	0.873253	2.38126	3.22603	0.713719	3.47881	3.21892	8.14604e-09	0.0382134
2126.83	1.25496	3.42461	3.10022	1.29913	3.59142	3.18658	-8.7233e-09	-0.0346763
2138.28	1.1207	3.57548	3.20002	1.10601	3.52765	3.01394	7.18696e-09	0.0294345
2149.73	1.05727	3.34336	3.06128	1.11505	3.65593	2.63817	-4.23127e-09	-0.0225849
2161.17	1.47718	3.42964	2.42412	1.14892	3.67738	3.12224	1.4294e-09	0.0103944
2172.62	1.49043	3.13245	2.1109	1.05049	3.51894	3.41205	4.46746e-10	0.00240107
2184.07	1.45919	3.17453	2.62091	1.13149	3.4405	3.48256	-2.55966e-09	-0.0190156
2195.51	1.71871	2.87467	3.03786	1.07783	3.77544	3.57543	3.45664e-09	0.0393092
2206.96	1.71589	2.87196	2.80988	1.03689	3.99991	3.52563	-2.6218e-09	-0.0731037
2218.41	1.62877	3.09568	2.09282	1.09963	3.48744	3.45661	1.90517e-09	0.136303
2229.85	1.69	2.95615	2.30691	1.08898	3.72142	3.29997	-9.78965e-10	0.435927
2241.3	1.51946	3.27684	2.97215	1.13283	3.45136	3.10867	-2.96525e-10	0.0825429
2252.75	1.52686	3.00707	2.78059	1.09202	2.64126	3.12132	8.7989e-10	-0.181554
2264.19	1.58423	3.29973	2.81399	1.20465	3.41978	3.09567	-1.25544e-09	0.420089
2275.64	1.38063	3.37974	2.88207	1.30879	3.76084	2.64697	1.20982e-09	0.265936
2287.09	1.3933	2.50513	2.63253	1.03615	3.71243	2.44044	-6.65603e-10	-0.0493514
2298.53	1.4249	3.32541	2.77998	1.17167	3.77721	2.48287	7.20149e-10	0.4789
2309.98	1.34856	3.80901	2.60468	1.30642	3.42959	2.39735	-2.59938e-10	0.129745
2321.43	1.19446	3.4322	2.30941	1.3282	3.50894	2.38541	-9.05928e-10	0.535642
2332.88	1.23798	3.55144	2.13072	1.52442	3.32625	2.26513	7.84793e-10	1.13728
2344.32	1.47351	3.63315	1.98852	1.54018	3.08877	2.19917	-2.71208e-10	0.467223
2355.77	1.44268	3.74036	2.11215	1.71079	3.24876	2.5726	2.63792e-10	0.544725
2367.22	1.45212	3.50259	1.72202	1.74002	3.30265	2.95983	-2.81866e-10	0.761211
2378.66	1.57628	3.35891	1.79828	1.92939	3.51667	2.98816	2.49141e-10	0.532244
2390.11	1.64244	3.51291	1.98995	2.11695	3.39112	2.7678	2.2406e-10	0.420365
2401.56	1.71207	3.65333	1.73258	2.13052	2.78254	2.96187	-4.28072e-10	0.455586
2413	1.80793	3.53463	1.99687	2.4846	2.44767	2.89603	4.52541e-10	0.448428
2424.45	1.94096	3.35852	2.08543	2.58108	2.2392	2.77533	-2.30553e-10	0.709772
2435.9	2.07416	3.49709	2.24922	2.91601	1.97567	2.91484	3.7908e-11	1.31083
2447.34	2.21891	3.46619	2.31853	3.21796	2.07304	1.80694	-9.84062e-11	1.25613
2458.79	2.29229	3.36564	2.29122	3.28949	2.28536	1.99812	-2.04107e-10	1.24805
2470.24	2.44065	3.23924	2.23903	3.45228	2.36212	2.94939	5.58513e-10	0.898817
2481.68	2.70062	3.20334	1.90608	3.43364	2.20676	2.50981	-4.20983e-10	0.101918
2493.13	2.60568	3.36856	2.09689	3.7027	1.99663	2.84909	-1.51015e-10	0.0447115
2504.58	2.64702	3.65502	1.8456	3.59366	2.12733	2.77342	4.80626e-10	-0.431795
2516.03	2.97056	3.79176	1.84922	3.62269	1.97814	2.56643	-3.61348e-10	-0.690427
2527.47	2.78648	3.8619	2.59127	3.75139	1.9124	2.90291	3.1572e-10	-0.0587259
2538.92	2.64669	4.16263	2.76766	3.58907	1.79035	2.72102	3.52852e-10	0.0721634
2550.37	2.49529	3.8303	2.79379	4.03666	1.56899	3.18724	-8.22456e-10	-0.111892
2561.81	2.0041	3.72548	2.78966	3.08857	1.58976	2.60654	3.06009e-10	0.180331
2573.26	1.68932	3.89728	2.96135	2.43759	1.01852	2.41787	1.63697e-10	0.43389
2584.71	1.5142	3.53158	2.79877	3.9303	0.977221	3.23036	-7.15091e-10	0.0247463
2596.15	1.70955	3.37095	2.80301	4.13238	1.15476	2.11258	5.24353e-10	-0.0547453
2607.6	1.84123	3.39767	3.13114	3.94139	1.20685	2.02993	2.12358e-10	0.0616283
2619.05	1.85672	3.62496	2.78066	4.42894	1.37619	2.64784	7.34656e-11	-0.0606708
2630.49	2.13632	3.33589	2.86764	4.41831	1.32629	2.44523	-8.37229e-11	0.0477151
2641.94	2.0392	2.87654	2.79209	4.5233	1.68539	2.30463	-3.95877e-10	-0.034526
2653.39	1.97161	3.3336	2.53622	4.42342	1.49814	1.60006	4.80796e-10	0.010877
2664.84	2.09623	3.69476	2.98038	4.47627	1.96865	1.34861	-7.66812e-10	0.0125123
2676.28	2.31447	3.2922	3.03842	4.84488	2.30037	1.29191	-3.44489e-10	-0.0574239
2687.73	2.57086	3.05899	3.00664	4.70171	1.75537	1.0672	9.20725e-10	0.52131
2699.18	2.61163	3.22809	3.21774	4.62618	2.32061	1.35207	-1.97956e-10	0.501368
2710.62	2.70124	3.21307	3.17439	4.66388	1.58121	0.99323	4.35796e-11	0.161886
2722.07	2.56791	3.42349	3.38188	4.53891	0.81163	0.221145	3.0185e-10	0.328765
2733.52	2.52056	3.72359	3.29902	4.73053	1.72189	0.721124	-3.86147e-10	0.395863
2744.96	2.40477	4.15643	2.79259	4.74002	1.7895	1.43651	-3.28786e-10	0.607719
2756.41	2.25206	4.16251	3.2107	4.66162	2.09493	1.46158	3.08125e-10	1.18883
2767.86	2.31037	3.7798	3.26603	5.06632	2.05998	1.363	-1.99105e-10	1.83308
2779.3	2.0628	4.12174	3.07981	5.10107	0.964156	1.32016	-6.44586e-11	1.92221
2790.75	2.05424	4.05666	3.23326	4.76828	1.48219	1.22907	1.23486e-09	1.81409
2802.2	2.0769	4.00614	2.43666	4.81251	2.5482	0.98665	-4.16365e-10	1.26021
2813.64	1.7472	4.23418	2.48472	5.0902	2.49104	1.28147	-8.01534e-10	0.697199
2825.09	1.51536	3.95801	3.22059	5.1675	2.44344	1.63044	7.3248e-10	0.675958
2836.54	1.40201	3.74005	3.12606	5.05469	3.20692	1.4708	-7.27348e-11	0.189323
2847.99	1.3433	3.71696	3.00062	5.04655	3.37828	1.27296	-3.29609e-10	-0.33038
2859.43	1.33966	4.19219	2.85273	5.15702	3.25973	1.079	3.31826e-10	-0.413129
2870.88	1.19753	4.60983	2.86193	5.38029	3.86802	0.963367	2.4083e-10	0.169354
2882.33	1.24851	4.55658	2.87049	5.60596	3.74246	0.951871	-4.83215e-10	0.399276
2893.77	1.553	4.64793	2.42392	5.44761	3.66154	0.954696	-6.62831e-11	0.294212
2905.22	1.41413	4.86266	2.07394	5.264	3.96397	1.05379	3.4191e-10	0.857323
2916.67	1.38179	5.13675	1.79891	5.40537	3.48067	1.05645	-3.67295e-10	0.656491
2928.11	1.64575	4.98309	1.39692	5.5212	2.77955	1.03536	1.12378e-10	0.573385
2939.56	1.79192	4.72131	1.26925	5.50061	3.08315	1.29873	2.7825e-10	0.901614
2951.01	1.74211	4.68895	1.3404	5.45267	3.6928	1.47153	-1.09129e-10	0.0141979
2962.45	1.54964	4.57127	1.34998	4.74349	3.87234	1.58266	2.83627e-10	0.0630996
2973.9	1.87162	4.69966	1.45308	4.38888	3.67967	1.87881	-6.80804e-11	0.581245
2985.35	2.09684	4.09277	1.64777	5.0433	2.99557	2.17201	-3.34778e-10	-0.590877
2996.79	2.03756	4.12755	1.53756	4.71009	3.26832	2.13262	1.54403e-10	-0.56473
3008.24	2.25279	5.23341	1.57462	4.68652	3.81915	2.18406	-1.7456e-10	-0.156536
3019.69	2.42389	5.17613	1.66398	5.29613	3.71712	2.5681	-2.55884e-10	-0.508824
3031.14	2.75559	5.10711	1.45328	4.95979	3.94526	2.43433	8.25739e-11	0.441187
3042.58	3.02652	5.18539	1.46488	4.83204	4.09675	2.51067	2.04622e-11	0.693924
3054.03	3.17509	4.98478	1.23348	4.82026	3.9545	2.75212	1.41831e-10	0.0646938
3065.48	3.44595	4.9866	1.52845	4.75368	3.84538	2.57977	-3.60099e-11	-0.00303403
3076.92	3.58243	5.03859	1.83758	4.84019	4.20328	2.80869	-3.7995e-11	-0.00614478
3088.37	3.72269	5.24932	1.70967	4.96487	4.47324	2.70812	1.96333e-10	0.00565355
3099.82	3.74906	4.95522	2.20541	4.99264	4.04415	2.30843	-1.54454e-10	-0.00253963
3111.26	3.65057	4.34317	2.23414	4.74004	3.79674	2.73371	-1.31671e-10	-0.0065518
3122.71	3.579	4.7078	2.26851	4.89684	3.7232	3.00118	-9.66606e-11	0.00232374
3134.16	3.51931	5.42422	2.34211	4.91504	3.71951	2.87883	3.8962e-10	0.416015
3145.6	3.69778	5.61122	2.25739	4.73381	3.78014	3.15532	4.0654e-10	0.51798
3157.05	3.84454	5.74767	2.44835	4.69313	3.60443	3.06962	-6.8451e-10	0.194723
3168.5	3.69959	5.51598	2.51512	4.65376	3.51626	2.88309	-6.56621e-14	0.455794
3179.94	3.78116	5.57841	2.57711	4.86943	4.00725	3.17852	1.19255e-10	0.0946566
3191.39	3.89788	5.96469	2.43752	4.76254	3.84652	3.38279	-1.4156e-10	-0.0973307
3202.84	3.82376	5.80638	2.50464	4.63803	3.07445	3.45571	3.79615e-10	0.120053
3214.29	3.86281	5.89298	2.54192	4.67993	3.76479	3.55494	-3.05152e-10	-0.179471
3225.73	3.77983	5.92379	2.35136	4.53911	4.04852	3.61726	-8.55335e-11	0.306537
3237.18	3.70767	5.92015	2.385	4.46579	3.586	3.51741	9.05192e-11	0.309812
3248.63	3.58111	5.99109	2.15541	4.0255	3.81214	3.11931	-5.10403e-10	0.324381
3260.07	3.52155	5.98186	2.24883	3.27887	3.90159	2.97703	4.5522e-10	0.567491
3271.52	3.42388	6.10071	2.42772	2.91906	4.09041	3.43735	3.68308e-10	0.16468
3282.97	3.2836	5.91191	1.77755	3.18564	4.09664	3.37523	-6.96536e-10	1.03203
3294.41	3.4378	6.10447	1.80138	3.22806	3.84549	3.07106	2.97242e-10	1.34186
3305.86	3.29041	6.41914	2.14948	2.82904	3.8917	3.24489	4.21278e-10	0.82139
3317.31	3.24566	6.46211	1.77975	2.97864	3.95044	3.04985	-3.05354e-10	0.943185
3328.75	3.17449	6.53865	1.61436	2.8429	3.86024	2.66177	2.97787e-10	1.08558
3340.2	2.97663	6.74787	1.81104	2.73282	4.04433	2.64428	-2.24979e-10	0.696667
3351.65	3.15041	6.70462	2.06919	3.05874	3.91284	2.76582	-1.83798e-10	0.234747
3363.1	3.07662	6.07771	1.90691	2.60295	3.90779	2.80791	4.63973e-10	0.344981
3374.54	3.36387	6.28154	1.91522	2.81941	4.35018	2.74253	-6.21265e-10	0.173639
3385.99	3.78003	6.82592	1.95709	3.52805	3.76691	2.74003	4.14961e-11	0.484185
3397.44	3.67003	6.82261	1.6644	3.64214	3.67622	2.70911	5.4275e-10	0.498413
3408.88	3.74095	6.79416	1.60019	3.91055	3.92899	2.63765	-6.46327e-10	0.175087
3420.33	3.61281	6.83295	1.46945	3.94251	3.79338	2.8212	-5.96065e-11	0.572746
3431.78	3.47582	6.79495	1.42305	3.84858	3.96434	2.45765	2.75881e-10	0.344579
3443.22	3.67968	6.54246	1.21921	3.90573	3.91612	2.28439	2.75861e-11	0.164707
3454.67	3.68801	6.36476	1.07993	4.18947	4.31285	2.64277	1.81246e-10	0.560509
3466.12	3.51313	6.11628	1.33611	4.38358	4.03183	2.42317	5.19889e-11	0.716117
3477.56	3.36938	5.95871	1.21506	4.53099	3.71656	2.60659	-8.70898e-11	0.93249
3489.01	3.2552	6.33427	1.23327	4.77897	4.44473	2.74734	2.33006e-11	1.40953
3500.46	3.20585	6.64899	1.40114	4.56853	4.4453	2.8302	3.11582e-10	1.54174
3511.9	3.29598	6.25634	1.2251	4.58312	4.22905	3.24247	-1.76573e-10	1.49578
3523.35	2.98408	5.93276	1.47533	5.01937	3.94973	3.15743	-3.099e-10	1.12423
3534.8	2.74328	6.28767	1.74013	5.05488	4.1216	3.14876	2.68074e-11	0.893196
3546.25	2.91417	6.36213	1.65026	4.34333	4.21695	3.30306	2.21403e-10	0.804927
3557.69	2.66325	5.94252	1.73354	4.68666	3.76711	3.18772	3.19494e-10	0.497147
3569.14	2.43316	6.24773	1.77522	5.71128	4.18441	2.88563	-9.01842e-11	0.891764
3580.59	2.25779	6.52288	1.91465	5.3155	4.21537	3.10157	-3.547e-10	0.361655
3592.03	2.16662	6.19161	2.06087	5.01492	4.212	3.18722	-1.34774e-10	0.0896815
3603.48	2.13335	6.72318	2.16417	4.85935	4.28856	3.06572	1.83689e-10	0.508237
3614.93	1.84562	5.87319	2.30969	4.2423	3.96036	3.08096	-4.25921e-11	-0.134637
3626.37	1.91303	4.27791	2.19877	3.56699	3.78873	2.79972	6.68637e-11	0.331985
3637.82	1.92861	5.8444	2.36302	2.71054	3.52981	3.05212	-3.67534e-10	1.16586
3649.27	1.83278	6.77283	2.57283	2.33296	3.90879	2.58413	-8.51309e-11	1.34496
3660.71	1.98127	5.15326	2.46871	2.12582	3.93227	2.07158	4.48181e-10	1.64167
3672.16	2.0341	5.39484	2.46402	1.92546	3.62091	2.61202	-2.22352e-10	1.61108
3683.61	2.29174	6.25503	2.41183	1.79823	3.79718	2.15072	3.95439e-10	1.31029
3695.05	2.36964	6.1482	2.18306	1.35017	3.90674	1.46141	-1.53758e-10	1.00138
3706.5	2.3199	5.93804	2.08326	1.22312	3.94439	1.36454	-1.47478e-10	0.725438
3717.95	2.72262	5.37613	2.09138	0.98383	3.85269	1.32715	5.68083e-10	0.201064
3729.4	2.67408	5.79419	1.5384	0.365298	3.78981	1.09412	-3.20985e-10	-0.0053159
3740.84	2.63875	4.36858	1.16605	0.0118202	3.67954	1.1311	-2.81278e-10	-0.0211276
3752.29	3.00428	2.5712	1.28747	-0.275625	3.88745	1.39916	1.35739e-10	-0.446925
3763.74	2.81557	3.99315	1.22958	-0.110517	3.65565	1.15075	1.91664e-10	-0.747246
3775.18	2.65304	5.04042	1.40049	0.184393	3.59551	1.48932	-2.67691e-10	-0.376053
3786.63	2.7876	4.0837	1.51826	0.2135	4.0281	1.73562	-1.30276e-10	-0.112601
3798.08	2.79209	3.39294	1.61183	0.549507	3.78326	1.35007	1.31065e-10	-0.43256
3809.52	2.74105	4.0823	1.62992	0.830822	3.86489	1.66788	1.6651e-10	-0.100637
3820.97	2.6985	3.96295	1.49204	1.17982	2.64169	1.53931	1.51293e-10	0.00973347
3832.42	2.6815	3.71579	1.74638	1.58555	2.55395	1.35239	-3.10988e-10	0.117698
3843.86	2.37773	4.2914	1.81952	1.75795	3.74321	1.60723	5.09536e-11	0.477193
3855.31	2.19792	3.99431	1.62856	2.02743	3.26291	1.65192	2.46807e-11	-0.0164313
3866.76	2.27793	4.00554	1.65269	1.92079	3.77624	1.40101	-9.49362e-11	-0.0492384
3878.21	2.25218	4.17369	1.75782	1.94426	2.91485	0.122664	3.38947e-10	0.0733652
3889.65	2.21561	3.51003	1.69168	2.19592	2.80052	0.564865	-1.07843e-10	-0.0836184
3901.1	2.00369	3.84387	1.81617	2.22909	4.13198	1.90883	-4.78934e-10	0.0737119
3912.55	1.90334	4.04676	2.03424	2.4531	3.59466	1.45955	3.35345e-10	0.398897
3923.99	1.9505	3.17492	1.97271	1.95784	4.03784	1.6341	3.31847e-10	0.731523
3935.44	1.94862	3.56954	2.08126	1.6343	3.81783	1.79142	-4.50913e-10	0.595467
3946.89	1.72834	3.72809	2.22737	2.29919	3.42509	1.43834	1.26637e-10	0.479365
3958.33	1.70523	2.89345	2.24845	2.35183	3.94874	1.80284	-6.62872e-11	0.455017
3969.78	1.97608	3.41859	2.18738	1.93366	3.72992	1.62896	-1.50068e-10	0.0619664
3981.23	1.84654	3.66954	2.15657	1.51438	3.79156	1.94467	2.91077e-10	-0.050251
3992.67	1.95158	3.21823	2.31394	1.14062	3.16142	2.39102	-3.26158e-10	0.035283
4004.12	2.11718	3.29955	2.4275	1.09412	2.36219	2.0828	-7.95084e-11	-0.0240903
4015.57	2.00817	3.16668	2.55154	1.17994	1.73372	2.64605	-4.6712e-11	0.000613192
4027.01	2.12599	3.15953	2.56772	0.893387	1.00162	2.88094	1.52294e-11	0.0120248
4038.46	2.26987	3.06579	2.58517	0.583662	1.21923	2.94611	3.65539e-10	-0.0340193
4049.91	2.20005	2.74326	2.93144	0.987717	1.23394	3.41394	-1.60901e-10	0.0391063
4061.36	2.26455	2.79416	3.11058	1.16783	1.40486	3.25623	2.31098e-10	-0.0446339
4072.8	2.47435	2.79282	3.22711	1.00823	1.59053	3.51614	2.70353e-10	0.0105566
4084.25	2.39482	2.70271	3.35749	1.27025	1.59868	3.77465	-4.60956e-10	0.384753
4095.7	2.41926	2.75977	3.32456	1.15789	1.95743	3.76476	-7.68878e-14	0.637959
4107.14	2.41219	2.69286	3.45011	1.06186	1.76981	4.28541	6.40491e-11	0.815959
4118.59	2.35806	2.52833	3.56871	1.44537	1.95842	4.56416	1.33172e-10	0.75277
4130.04	2.54181	2.58615	3.81551	1.37688	2.11321	4.77514	8.56701e-11	1.07623
4141.48	2.67788	2.8001	3.92257	1.32461	1.97861	4.90939	-6.34771e-10	1.241
4152.93	2.64154	2.86636	3.91237	1.09902	1.90607	4.94858	1.99872e-10	0.935967
4164.38	2.51531	2.77355	3.98173	0.310465	1.69546	5.11226	1.73601e-10	1.24592
4175.82	2.56419	2.85259	3.8011	-0.0222915	1.93483	5.16885	-2.65572e-10	1.24861
4187.27	2.37504	3.04711	3.66008	-0.233187	2.02008	5.43732	8.56882e-11	1.18103
4198.72	2.3468	2.86028	3.144	-0.591962	2.18489	5.4994	-2.99666e-11	1.4236
4210.16	2.63185	2.75899	2.81827	-0.450867	2.44126	5.296	5.98474e-10	1.46777
4221.61	2.55597	3.07078	3.19767	-0.24775	2.32634	5.46231	-2.23978e-10	1.44195
4233.06	2.54321	3.14008	3.32117	-0.238068	2.37329	5.42244	-5.49968e-10	0.884045
4244.51	2.75321	3.01362	3.06768	-0.0473618	2.40405	4.99721	2.2817e-10	0.573809
4255.95	2.76801	2.8556	3.03876	0.0207679	2.14391	4.7868	-1.73835e-11	0.504972
4267.4	2.56731	2.82017	3.36947	0.054017	1.98044	4.10185	2.1597e-10	-0.0410767
4278.85	2.56288	2.90742	3.22904	0.261003	2.23952	3.77063	-1.22177e-10	-0.462201
4290.29	2.56731	2.74515	3.07782	0.269785	2.33861	4.25752	3.12769e-10	-0.495372
4301.74	2.59954	2.63799	2.98474	0.475284	2.25668	4.24965	-5.56597e-15	-0.4269
4313.19	2.70224	2.79026	2.64248	0.74165	2.49963	4.50383	-5.10293e-10	-0.356028
4324.63	2.4796	2.81308	2.83963	0.743848	2.45143	4.881	3.25973e-10	0.140494
4336.08	2.3334	2.73827	2.53757	0.880203	2.7075	4.76337	-7.00489e-11	0.4108
4347.53	2.37707	2.82887	1.71181	0.925662	3.0974	4.61602	-8.29264e-11	0.44965
4358.97	2.43658	2.70789	1.65277	1.17133	2.28071	4.16491	7.77309e-12	0.601695
4370.42	2.53038	2.57624	1.97278	1.50664	2.53206	4.25773	-7.84298e-11	0.161941
4381.87	2.4476	2.51667	2.27975	1.54423	2.54172	4.49049	1.93836e-10	-0.0656118
4393.31	2.28594	1.99101	2.36617	1.70517	1.34494	4.01356	-9.01245e-11	0.0306802
4404.76	2.14496	2.20234	2.43	1.77557	2.19897	4.22256	1.25038e-10	-0.00892124
4416.21	1.97638	2.92409	2.90271	1.73348	2.92716	4.41518	1.09437e-10	-0.00959336
4427.66	1.81611	2.1947	2.96023	1.60997	2.68905	4.25519	-4.65245e-10	0.0106355
4439.1	1.63054	1.62976	2.79301	1.26024	2.10862	4.29233	2.134e-10	0.00186816
4450.55	1.48347	2.35489	2.7557	0.703504	1.54092	4.17893	3.59553e-10	-0.0577927
4462	1.31439	2.70798	2.51602	0.182054	2.03859	4.47622	-4.27305e-10	0.320485
4473.44	1.10417	2.39583	2.66952	0.0774979	2.12225	3.79056	1.40456e-10	0.348103
4484.89	1.18	2.12778	2.5293	-0.169314	2.1941	2.97013	1.49926e-10	-0.0953158
4496.34	1.29899	2.64082	2.40252	-0.414241	2.81111	3.96921	-4.13954e-10	0.0109443
4507.78	1.29839	2.62856	2.53789	-0.403025	3.26356	3.64284	5.71701e-11	0.0422289
4519.23	1.49974	1.97045	2.32004	-0.435828	3.23918	2.79871	4.41014e-10	-0.0819414
4530.68	1.58292	2.29913	2.4473	-0.320038	2.42798	2.50555	-2.81584e-11	0.101011
4542.12	1.56087	2.21551	2.25701	-0.230171	1.9745	0.970458	-3.76572e-10	-0.101986
4553.57	1.54716	1.72352	2.19861	-0.0837105	2.87607	0.264259	3.89224e-10	0.0660088
4565.02	1.40183	1.86571	2.21531	0.0499151	3.22905	0.187015	1.3629e-10	0.472781
4576.47	1.43293	1.82086	1.77343	-0.0255649	3.30953	-0.169343	-5.92898e-10	0.0362664
4587.91	1.44451	1.61428	1.92076	0.000409932	3.24589	-0.0416971	1.99929e-10	0.294708
4599.36	1.27046	1.17583	1.87662	0.0967827	1.65176	-0.254044	4.58093e-10	0.351042
4610.8	1.15257	1.02268	1.57675	0.0626534	2.35768	-0.306467	-5.84799e-10	-0.115978
4622.25	1.0114	0.881542	1.45704	-0.013557	2.90578	-0.146646	5.14387e-11	0.0428316
4633.7	0.852758	0.245024	1.2504	-0.00266937	2.34517	-0.35972	4.13866e-10	-0.00732178
4645.14	0.746566	0.695286	1.10748	0.0111418	3.41268	-0.203492	-2.35245e-10	-0.010261
4656.6	0.581824	1.13805	1.04376	-0.0135411	1.38918	-0.127044	-3.2566e-11	0.0113595
4668.04	0.46581	0.441971	0.848254	0.010459	0.24728	-0.141018	-3.02549e-10	-0.00713544
4679.49	0.335603	0.381551	0.685293	-0.00749955	2.15459	-0.0356821	3.81591e-10	-0.00182669
4690.93	0.175671	0.803496	0.847505	-0.006106	2.59788	-0.290156	1.7161e-10	0.00354185
4702.38	0.187868	0.964599	0.42757	0.0192459	1.77776	-0.215157	-4.41242e-10	-0.00169964
4713.84	-0.0648899	0.993492	0.148995	-0.129562	1.24244	-0.109715	1.34324e-10	-0.0207344
4725.26	-0.0971789	0.805602	0.353123	-0.0339501	2.55016	-0.230081	-1.58051e-10	0.0466899
4736.73	0.0777223	0.735523	0.0655331	0.246998	3.15686	-0.114216	8.94658e-11	-0.105472
4748.16	-0.174511	0.672148	0.0654883	0.461351	3.15058	-0.0390482	3.18568e-10	0.20445
4759.62	-0.116351	0.584236	0.109192	0.715514	3.50037	-0.017714	-3.9181e-10	0.339887
4771.07	-0.0628372	0.589596	0.0518571	0.724865	3.40071	-0.129253	1.45783e-10	0.517213
4782.49	0.0255801	0.628538	0.0326568	0.79546	3.52216	0.0142535	7.05795e-10	1.15487
4793.99	0.089105	0.544616	-0.232697	0.960898	3.51019	0.137861	-6.64368e-10	1.04263
4805.37	-0.121406	0.301705	-0.109545	1.07268	3.52042	-0.0181851	-1.86961e-10	0.974458
4816.88	-0.0445849	0.300884	0.00983268	1.34326	3.24463	0.116433	3.41624e-10	0.654835
4828.29	-0.101278	0.567356	-0.102052	1.43489	2.8573	0.0315339	-3.65939e-10	0.114898
4839.72	0.290895	0.621	0.125664	1.44404	1.80905	0.0542549	3.83468e-10	-0.03215
4851.25	0.469767	0.375938	0.19572	1.55519	0.944831	0.0622926	-1.84436e-10	-0.00237401
4862.55	-0.100845	0.364949	-0.00794859	1.52932	0.954021	-0.229278	6.86775e-12	0.0554712
4874.19	0.00899049	0.48798	-0.00629147	1.50486	0.652082	-0.0330178	6.67272e-11	-0.496428
4885.43	0.201699	0.452669	-0.00926021	1.59894	0.593565	0.0370753	-8.72029e-11	-0.672936
4897.04	0.0306877	0.580619	0.048648	1.64849	0.0557754	-0.0358768	-1.9316e-10	-0.393364
4908.49	-0.0410219	0.586568	0.310972	1.62989	-0.165027	0.0284202	-6.6157e-10	-0.181466
4919.75	0.049829	0.548596	0.514579	1.61769	0.332713	-0.0180638	4.09953e-10	0.0672147
4931.79	0.0899847	0.74191	0.588038	1.6787	0.336297	0.00578911	2.11331e-10	-0.0114765
4942.33	-0.049674	0.640272	0.485486	2.02424	0.366825	0.00596205	3.83799e-09	-0.0184361

## Sheet: equalsep
Time	Fly1	Fly2	Fly3	Fly4	Fly5	Fly6	Fly7	Fly8	Fly9	Fly10
9.04816	-5.55609e-06	-1.47372e-06	6.793e-06	-1.04923e-07	-2.81239e-07	-9.7529e-06	2.17485e-05	1.81685e-05	-4.06668e-06	6.74765e-06
20.6654	4.3952e-06	5.67511e-07	-9.23723e-06	-2.52832e-06	-1.27063e-05	7.59202e-06	-1.777e-05	-1.97132e-05	4.08107e-06	-5.5004e-06
32.0169	-1.23412e-06	9.13183e-07	9.51983e-06	5.39116e-06	2.67448e-05	-1.91108e-06	6.00369e-06	1.51096e-05	-2.69495e-06	1.83597e-06
43.516	-3.67396e-06	-2.69824e-06	-6.63959e-06	-7.59292e-06	-3.74353e-05	-6.80375e-06	1.27514e-05	-3.37374e-06	-1.99532e-07	3.99335e-06
54.9464	9.36793e-06	4.29971e-06	2.66793e-07	8.09838e-06	3.96938e-05	1.68174e-05	-3.49534e-05	-1.44317e-05	4.23544e-06	-1.08837e-05
66.3754	-1.4214e-05	-5.08888e-06	8.86246e-06	-6.02408e-06	-2.92161e-05	-2.52218e-05	5.43917e-05	3.47079e-05	-8.49907e-06	1.69038e-05
77.8637	1.61873e-05	4.45415e-06	-1.87543e-05	1.00633e-06	4.28852e-06	2.84475e-05	-6.32112e-05	-5.14997e-05	1.16162e-05	-1.96152e-05
89.2613	-1.34069e-05	-2.01891e-06	2.63184e-05	6.4562e-06	3.25396e-05	-2.32175e-05	5.39328e-05	5.75631e-05	-1.20331e-05	1.66999e-05
100.751	4.84326e-06	-2.13036e-06	-2.79746e-05	-1.48138e-05	-7.35515e-05	7.79896e-06	-2.21871e-05	-4.63228e-05	8.47724e-06	-6.81017e-06
112.171	8.97009e-06	7.28029e-06	2.0682e-05	2.15602e-05	0.000106362	1.67541e-05	-3.04784e-05	1.44179e-05	-5.12883e-07	-9.56171e-06
123.626	-2.54674e-05	-1.20743e-05	-3.21225e-06	-2.36968e-05	-0.000116233	-4.57986e-05	9.46596e-05	3.57959e-05	-1.09584e-05	2.94834e-05
135.079	4.00852e-05	1.47113e-05	-2.26691e-05	1.85597e-05	9.01714e-05	7.12027e-05	-0.000153052	-9.46681e-05	2.34492e-05	-4.75733e-05
146.511	-4.69996e-05	-1.33804e-05	5.15593e-05	-4.87811e-06	-2.21331e-05	-8.26888e-05	0.000183109	0.000145529	-3.30809e-05	5.68306e-05
157.976	4.06067e-05	6.88131e-06	-7.47594e-05	-1.62056e-05	-8.19828e-05	7.0479e-05	-0.000162625	-0.000167499	3.53378e-05	-5.0372e-05
169.408	-1.75455e-05	4.70655e-06	8.18934e-05	4.05198e-05	0.000201373	-2.88734e-05	7.75272e-05	0.000140925	-2.6358e-05	2.3852e-05
180.864	-2.12053e-05	-1.95164e-05	-6.37832e-05	-6.10348e-05	-0.000301269	-4.00799e-05	6.98727e-05	-5.46666e-05	4.53868e-06	2.19773e-05
192.307	6.88503e-05	3.37907e-05	1.61146e-05	6.90903e-05	0.000339085	0.000124051	-0.00025482	-8.65027e-05	2.79661e-05	-7.9394e-05
203.753	-0.000112686	-4.23869e-05	5.70387e-05	-5.6699e-05	-0.000275843	-0.000200377	0.000429267	0.00025688	-6.44173e-05	0.000133453
215.204	0.00013601	3.99718e-05	-0.000141111	1.95837e-05	9.11251e-05	0.000239554	-0.000528695	-0.000409941	9.39007e-05	-0.000164117
226.645	-0.000122207	-2.27781e-05	0.00021168	3.97949e-05	0.000202149	-0.00021254	0.000487473	0.000485683	-0.00010335	0.000151037
238.098	6.0515e-05	-9.4481e-06	-0.000238784	-0.000110271	-0.0005483	0.000100975	-0.000261025	-0.000425692	8.11509e-05	-8.04359e-05
249.541	4.78171e-05	5.1898e-05	0.000194946	0.000172191	0.000850277	9.20299e-05	-0.000150015	0.000193966	-2.17442e-05	-4.73938e-05
260.989	-0.000184943	-9.42417e-05	-6.5681e-05	-0.000200658	-0.000985816	-0.00033398	0.000681148	0.000201339	-6.99669e-05	0.000212317
272.436	0.000315649	0.000121858	-0.000140142	0.000171926	0.0008388	0.000561938	-0.0011996	-0.000692374	0.000175966	-0.000373016
283.882	-0.000392244	-0.000119036	0.000383708	-7.20318e-05	-0.000341381	-0.000691529	0.00152157	0.0011502	-0.000265832	0.000472387
295.331	0.000365773	7.39046e-05	-0.000597184	-9.43872e-05	-0.000482822	0.000637089	-0.00145413	-0.00140368	0.000301898	-0.0004506
306.776	-0.000202291	1.58192e-05	0.00069479	0.000298003	0.0014881	-0.000340581	0.000857583	0.00128044	-0.000248982	0.000264498
318.224	-9.92613e-05	-0.000137848	-0.000594324	-0.000484535	-0.00240356	-0.00019706	0.000284417	-0.000664781	8.74284e-05	9.06512e-05
329.67	0.00049303	0.000263218	0.000246339	0.000582704	0.00287099	0.000891852	-0.00180758	-0.000439409	0.000173288	-0.000563471
341.117	-0.000882297	-0.000349199	0.000335147	-0.000521049	-0.00253206	-0.00157091	0.00334697	0.00185935	-0.000484436	0.00104047
352.564	0.00113075	0.00034894	-0.00104893	0.000252064	0.00116066	0.00199413	-0.00437652	-0.00323819	0.00075664	-0.00135854
364.011	-0.00109228	-0.000227866	0.00170017	0.000219997	0.00118909	-0.00190752	0.00432138	0.00407374	-0.000874827	0.00133989
375.458	0.000657652	-1.84715e-05	-0.00202617	-0.000815891	-0.0040767	0.00112314	-0.00274041	-0.00383093	0.000732518	-0.000848085
386.905	0.000188333	0.0003525	0.00176581	0.00137402	0.0066686	0.000385725	-0.000454638	0.00212925	-0.000280967	-0.000144888
398.352	-0.00132224	-0.00069873	-0.000771917	-0.00167678	-0.00793126	-0.0024016	0.00481001	0.00102623	-0.00043533	0.00149974
409.799	0.00247121	0.00095389	-0.000881788	0.00150913	0.00705161	0.00442081	-0.00927633	-0.00508356	0.00126263	-0.00289105
421.245	-0.00321383	-0.00100783	0.00284326	-0.000736675	-0.00388192	-0.00571439	0.0123443	0.00893639	-0.0019251	0.00384739
432.692	0.00313709	0.000829728	-0.00444198	-0.000534553	-0.00119819	0.00555423	-0.0123778	-0.0110274	0.00227194	-0.00385421
444.139	-0.0019394	-0.000312586	0.00511673	0.00202096	0.008459	-0.00334636	0.00841499	0.0102742	-0.00223727	0.00259741
455.586	-0.000147947	-0.000629412	-0.00469501	-0.00325332	-0.0167189	-0.000753399	-0.000422012	-0.00650281	0.00198868	-3.82507e-05
467.033	0.00279142	0.00235627	0.00381199	0.00428359	0.0244642	0.00613236	-0.010449	0.000986175	-0.000507756	-0.00339162
478.48	-0.00712082	-0.00419767	-0.00175877	-0.00534379	-0.0310102	-0.0111223	0.0236755	0.00731098	-0.00447568	0.00736173
489.927	0.00791865	0.00244728	-0.0066652	0.0027315	0.0339283	0.0132664	-0.0381154	-0.0252108	0.00420374	-0.0115301
501.374	-0.0111002	-0.00564565	0.00928288	-0.00377408	-0.0265937	-0.0205714	0.0373992	0.0291301	-0.014009	0.0112533
512.821	0.00399215	-0.00354906	-0.0240878	-0.00510419	-0.126819	0.00934033	-0.0411765	-0.0515942	0.0112276	-0.0130243
524.267	-0.00843448	0.00364869	0.0302923	0.00545957	0.147973	-0.0144799	0.0117765	0.0471118	-0.0258975	0.00186746
535.714	0.0501715	-0.0279987	-0.0565366	-0.024743	-0.00816637	-0.0165443	0.015444	-0.0651794	0.0125751	0.00384239
547.161	0.249835	0.088266	0.0935395	0.168241	-0.0198544	0.0870371	-0.112148	0.0632983	0.426697	-0.0246787
558.608	0.328813	0.467396	0.740294	0.400332	0.0715174	0.269006	0.64285	1.28715	0.83844	0.193918
570.055	0.537993	0.842316	0.90692	0.584217	-0.352913	1.17196	1.23354	1.79004	1.03147	0.366287
581.502	0.905211	1.05059	0.90937	0.941234	-0.317668	1.84169	1.62153	1.8804	1.36138	0.639625
592.949	1.38286	1.3291	1.18868	1.18768	0.0607778	2.15071	1.87988	2.35559	1.90452	0.975102
604.396	1.58094	1.53065	1.40552	1.52886	0.399793	2.81506	2.0877	2.41219	2.37892	1.25493
615.842	1.60255	1.82807	1.8952	1.99611	0.213632	3.06793	2.46825	2.60036	2.79729	1.72649
627.289	2.3919	2.4462	2.12865	2.27403	-0.119665	3.56505	2.21731	2.7612	3.2338	1.97356
638.736	2.85788	2.65941	1.95742	2.65803	0.298378	3.80753	2.95973	2.74733	3.39693	2.20423
650.183	2.74227	2.69533	2.38926	3.08807	0.555647	3.61358	3.58435	2.92829	3.55936	2.48407
661.63	3.01396	2.86415	2.93173	3.45337	0.291194	4.39184	3.20719	2.96762	4.00305	2.61397
673.077	3.19926	2.73155	3.05339	3.68321	0.488214	5.06291	3.25546	2.87733	4.13562	2.76102
684.524	3.22203	2.63055	3.14916	3.75711	0.591682	5.07753	3.20436	2.93596	4.27297	2.75532
695.971	3.26147	2.79801	3.24309	3.97062	-0.00835505	5.12077	3.58375	3.25445	4.51306	2.89006
707.418	3.28622	2.96792	3.39044	4.15423	0.083348	5.08047	3.984	3.32857	4.29239	3.05727
718.864	3.36237	3.16252	3.40918	4.34719	0.371011	5.05197	3.81904	3.08769	4.27662	2.97103
730.311	3.48879	3.23008	3.3884	4.52687	0.207398	5.2749	3.88456	3.38515	4.33286	3.07125
741.758	3.51375	3.03562	3.79496	4.53616	-0.233123	5.06167	3.77335	3.46302	4.23916	3.30358
753.205	3.40221	2.86492	3.6225	4.42999	-0.411938	4.78883	3.50576	3.238	4.53604	3.31385
764.652	3.54388	2.93775	3.19616	4.45074	0.016669	4.55903	3.35624	3.50257	4.51884	3.24232
776.099	3.64349	3.01824	3.46401	4.62753	-0.35368	3.85314	3.1842	3.39767	4.57982	3.43573
787.546	3.66441	2.78895	3.49361	4.50396	-0.301443	3.85267	3.34023	3.38825	4.98726	3.44834
798.993	3.86762	2.8329	3.55992	4.57346	0.140363	3.71347	2.86221	3.53469	4.81048	3.32397
810.44	3.88818	3.05252	3.58235	4.55933	-0.0730492	3.22512	2.23066	3.39819	4.79149	3.45593
821.886	3.88125	2.90075	3.58631	4.30714	0.0262756	2.90281	2.3704	3.60517	5.04361	3.0225
833.333	3.79047	2.84697	3.81582	4.28821	0.0102954	2.14082	2.25441	3.73166	4.91239	2.58276
844.78	3.61949	3.08646	3.63095	3.92986	-0.0302241	1.72486	2.14349	3.49299	4.73105	2.58299
856.227	3.48004	3.14804	3.5309	4.00429	0.0387797	1.45946	1.94014	3.32125	4.68879	2.30865
867.674	3.12245	3.07072	3.55064	3.85894	-0.0330942	1.06392	1.84167	3.52721	4.51356	2.30988
879.121	2.88717	3.16954	3.19463	3.10098	0.0199715	0.622304	1.51423	3.50135	4.50114	2.27095
890.568	3.08777	2.97444	3.02726	2.60203	-0.00205657	0.479433	0.902651	3.41695	4.66454	2.11445
902.015	3.16255	2.77072	2.82136	2.17399	-0.016816	0.681837	1.21328	3.68541	4.46648	2.24518
913.462	2.83731	2.77124	1.75129	2.62063	0.0318447	0.393223	1.39261	3.48653	4.33703	2.2041
924.908	2.95252	2.62765	1.42891	2.01232	-0.037396	0.452069	1.18797	3.3159	4.29051	2.21066
936.355	2.88516	2.59742	1.96598	1.08126	0.0328776	0.579943	1.22894	3.54827	3.87328	1.95833
947.802	2.57961	2.56157	1.48276	1.65257	-0.0140666	0.287172	1.22411	3.76179	3.65421	1.68106
959.249	2.98151	2.61481	1.24092	1.42775	-0.0219081	0.436549	1.03936	3.81368	3.58826	1.64664
970.696	2.91893	2.63672	1.56864	1.30809	0.076907	0.650081	0.817091	3.78939	3.37911	1.49024
982.143	2.8375	2.43192	1.3386	1.44084	-0.17023	0.792236	0.755312	3.90967	3.35801	1.55512
993.59	3.22764	2.45748	1.39601	1.39342	-0.0251079	0.693727	0.598024	3.79631	3.16965	1.3542
1005.04	3.26182	2.54853	1.38543	1.64759	-0.138694	0.486065	0.715518	3.89576	2.49571	1.10622
1016.48	3.23587	2.39763	0.941676	1.66939	-0.100994	0.560097	0.775417	4.25277	1.30691	1.10714
1027.93	3.10152	2.55003	0.864832	1.86374	0.411514	0.506799	0.569591	4.10586	0.232087	0.801364
1039.38	3.1337	2.781	0.989897	2.11604	-0.0423753	0.573278	0.663959	4.15533	-0.201145	0.789703
1050.82	3.22979	2.43539	1.1021	2.16356	-0.0942028	0.652903	0.560947	4.33992	-0.501916	0.801487
1062.27	3.12585	2.38838	1.21046	2.20244	0.136658	0.67416	0.520018	4.32574	-0.70408	0.441031
1073.72	3.12717	2.52055	1.31818	2.26601	-0.0465139	0.767763	0.563992	4.52705	-0.864232	0.343442
1085.16	3.02245	2.3519	1.32719	2.04208	0.0211235	0.874647	0.455127	4.63271	-0.846025	0.368507
1096.61	3.2337	2.61086	1.2178	1.81192	-0.00499807	0.858313	0.529783	4.54864	-0.451971	0.4035
1108.06	3.38653	2.71774	1.28432	1.97238	-0.00588872	0.800324	0.651664	4.61782	-0.276409	0.437645
1119.51	3.16636	2.57983	1.36114	2.08582	0.00898784	0.974292	0.658271	4.75557	-0.0731237	0.27836
1130.95	3.29024	2.67546	1.40423	1.94168	-0.00653987	0.554651	0.513692	4.49131	0.174288	0.186185
1142.4	3.28502	2.53766	1.38444	2.1231	0.000976422	0.415214	0.561723	4.24248	0.0185437	0.517002
1153.85	3.16434	2.56853	1.33817	2.5612	0.00501744	0.767976	0.528808	4.08174	-0.0291047	0.747168
1165.29	3.19985	2.72336	1.50664	2.49308	-0.00904794	0.541762	0.337393	3.84009	0.0365696	0.659419
1176.74	3.08075	2.67655	1.54252	2.44096	0.00574695	0.499508	0.458993	3.91628	-0.00131713	0.680887
1188.19	3.06107	2.67174	1.49451	2.57424	0.0151149	0.441578	0.482625	3.70333	0.13859	0.617826
1199.63	3.18299	2.57259	1.48487	2.5362	-0.106101	0.151423	0.39837	3.15791	0.156964	0.622109
1211.08	3.09539	2.48408	1.418	2.52411	0.0415934	-0.0227823	0.41567	2.91797	-0.0839747	0.605335
1222.53	3.18654	2.46081	1.56119	2.54784	0.0745109	-0.0440298	0.35977	2.49001	0.0161587	0.369014
1233.97	3.16614	2.39439	1.56972	2.58017	-0.038245	-0.0734355	0.339894	2.02686	0.0545099	0.273659
1245.42	2.81954	2.37887	1.41363	2.42304	0.0240105	-0.274168	0.410697	1.92718	-0.0449689	0.167797
1256.87	3.33426	2.30741	1.50378	2.46419	-0.023506	-0.280634	0.597473	1.5394	0.0430286	0.0111809
1268.31	2.40457	2.31682	1.64681	2.42174	0.0352153	-0.301313	0.642048	1.16963	-0.0532853	-0.0576853
1279.76	1.27868	2.43786	1.57662	1.84984	-0.0510371	-0.303113	0.549091	0.946522	-0.00992388	-0.117032
1291.21	2.63961	2.25212	1.6119	1.91479	-0.435476	-0.200948	0.683345	0.71842	-0.00169881	-0.143786
1302.66	2.66875	2.18183	1.63758	2.14974	-0.1732	-0.15846	0.79875	0.683166	-0.0998427	-0.25008
1314.1	2.2282	2.09049	1.38713	1.9678	0.346949	-0.037217	0.843315	0.686694	0.00214895	-0.441031
1325.55	2.57087	1.78897	1.41891	1.99964	-0.204009	-0.05945	0.873105	0.698464	0.00729814	-0.226534
1337	2.68497	1.69828	1.41819	1.81641	-0.13769	-0.0964506	0.894477	0.72019	0.000483982	-0.0351108
1348.44	2.84576	1.32349	1.35748	1.6117	0.264355	0.100113	0.988856	0.733868	-0.166957	-0.158526
1359.89	2.52846	1.15387	1.38687	1.66452	-0.39654	0.176214	0.991533	0.786985	-0.0394475	-0.033575
1371.34	2.5124	1.20421	1.23441	1.51009	-0.176165	0.117256	0.935528	0.680465	0.306902	0.016188
1382.78	2.54622	0.903604	1.29394	1.4524	0.126979	0.196721	1.01134	0.485182	0.0356679	0.0358777
1394.23	2.64768	0.86568	1.26822	1.4053	0.250394	0.183291	1.10098	0.512082	-0.127144	0.113491
1405.68	2.48921	0.796923	1.13952	1.2675	0.129174	0.135907	1.01473	0.515615	-0.0550722	0.0764892
1417.12	2.01079	0.578696	1.18765	1.4433	-0.443795	0.188778	1.00597	0.631202	-0.0406452	0.0629614
1428.57	2.4462	0.528025	1.19868	1.41529	0.0502466	0.121769	1.00942	0.777029	0.0724859	-0.0163396
1440.02	2.44911	0.410134	1.22665	1.30647	0.101751	0.0822174	0.840386	0.675175	-0.0346857	-0.00777361
1451.47	2.22115	0.357082	1.19924	1.33337	-0.333619	0.146608	0.844687	0.815556	-0.1488	0.0305037
1462.91	2.39201	0.313732	1.19821	1.39945	0.362607	0.181089	0.868054	0.917346	0.109555	-0.104733
1474.36	2.3151	0.259951	1.23944	1.47668	0.710219	0.0965059	0.823095	0.775029	0.486104	-0.0710648
1485.81	2.14924	0.354664	1.16141	1.26248	-0.549709	0.0517677	0.869284	1.07062	0.45338	0.0242895
1497.25	1.97932	0.237254	1.15209	1.46349	-0.402181	0.078549	0.699854	1.0727	0.396727	-0.0303118
1508.7	2.06202	0.148436	1.2881	1.42137	0.472056	-0.00997179	0.555171	1.01121	0.5067	0.0836143
1520.15	1.86262	0.349098	1.42856	1.34912	-0.312661	0.010833	0.471926	1.20325	0.384068	0.118325
1531.59	1.81681	0.243018	1.4599	1.73342	0.303112	-0.0129681	0.318205	0.156833	0.422799	0.17119
1543.04	1.99347	0.0510211	1.34585	1.49955	0.151923	-0.0699249	0.282834	-0.0231596	0.602123	0.434915
1554.49	1.58904	0.196854	1.39641	1.62888	-0.666842	-0.056555	0.324546	1.15549	0.532499	0.480589
1565.93	1.75182	0.141351	1.49703	1.66562	-0.033568	-0.0709712	0.432817	1.36826	0.561728	0.601523
1577.38	2.05802	0.118564	1.21714	1.73831	-0.120792	0.0397831	0.544113	1.50314	0.695584	0.837699
1588.83	2.03105	0.511529	1.22499	2.23431	0.166931	-0.0642193	0.661932	1.55426	0.577516	0.879206
1600.27	2.24141	0.646381	1.38423	2.24435	-0.0494802	0.00381337	0.679505	1.43906	0.452365	0.964094
1611.72	2.2272	0.841629	1.28966	2.43679	-0.00391513	0.0637914	0.739769	1.65345	0.439052	1.18639
1623.17	2.17702	1.28361	1.50032	2.55947	0.499606	-0.133201	0.745145	1.54987	0.331033	1.29834
1634.62	2.30236	1.48656	1.59804	2.71484	-0.226278	0.0963918	0.794828	1.56148	0.142997	1.29194
1646.06	2.38415	1.75022	1.5573	2.78025	-0.225917	0.00134703	0.989531	1.84461	0.127727	1.443
1657.51	2.36561	2.1787	1.70719	2.81356	0.15746	0.0477026	1.04762	1.64793	0.0616804	1.44093
1668.96	2.34417	2.49015	1.74704	3.07582	0.215384	0.386834	1.21589	1.61143	-0.16671	1.48511
1680.4	2.42232	2.76698	1.69372	2.7004	0.129453	0.214893	0.998832	2.11133	-0.236952	1.6769
1691.85	2.48275	3.24571	1.85066	2.94348	0.0152816	0.271297	0.891532	2.08836	-0.307213	1.55335
1703.3	2.4141	3.59126	2.05864	3.4101	-0.38431	0.306732	1.22797	2.165	-0.0610689	1.63002
1714.74	2.4451	3.9462	1.93255	3.00247	-0.219891	0.321238	1.09913	2.35928	0.00259338	1.60593
1726.19	2.47782	4.12295	2.11955	3.18414	0.75892	0.399419	1.36408	2.42743	-0.339641	1.33915
1737.64	2.28079	3.99924	2.34407	3.19851	0.0514525	0.375347	1.49812	2.99392	0.23286	1.4769
1749.08	1.94565	4.08829	2.38051	2.95591	-0.46424	0.430458	1.00775	2.67204	0.71374	1.30508
1760.53	1.65184	3.95063	2.35149	3.71251	0.614939	0.433066	1.49116	2.48415	0.529389	1.08918
1771.98	1.73755	4.23337	2.1641	3.94163	0.555691	0.598787	2.1299	2.70403	0.69055	1.25013
1783.42	1.67386	4.25113	2.67267	3.78441	-0.331509	0.509932	2.03719	2.26652	0.777681	1.0925
1794.87	1.6504	4.01917	2.98811	4.01899	-0.0393823	0.500731	2.06549	2.91443	0.730687	1.12492
1806.32	1.89194	4.65048	2.88861	3.57644	1.21792	0.659912	2.22397	3.5736	0.87141	1.37138
1817.77	1.61147	4.78141	3.08197	3.4485	1.53002	0.605402	2.26693	3.12866	0.922213	1.41642
1829.21	1.7153	5.13358	3.24513	4.21457	1.01564	0.730803	2.43565	2.90978	0.878083	1.46971
1840.66	1.83806	4.69318	3.38509	4.71041	1.42659	0.790087	2.47722	3.35797	0.847458	1.6707
1852.11	1.69262	4.03364	3.37995	4.49885	1.67391	0.899472	2.37181	3.52046	0.937097	1.82797
1863.55	1.96398	5.21665	3.40841	4.16639	1.5329	0.995328	2.58284	3.28279	0.826226	1.47621
1875	1.7444	5.43745	3.58508	4.53609	1.64537	1.03049	2.63886	3.34879	0.4116	1.54203
1886.45	1.62268	4.91911	3.59727	4.83478	1.5096	0.904014	2.82974	3.33571	0.312073	2.25828
1897.89	1.47541	5.36959	3.40654	4.58297	1.87136	0.839637	2.84872	3.27659	0.268447	2.47847
1909.34	1.26785	5.61582	3.34218	4.54349	2.17605	1.22087	2.46235	3.32308	0.307261	2.35591
1920.79	1.31286	5.21507	3.393	4.82693	2.18535	1.2954	2.91932	3.37377	0.359218	2.27768
1932.23	1.15332	5.41529	3.63152	4.62973	2.56053	1.29371	3.02897	3.43674	0.264495	2.4384
1943.68	1.44573	5.97798	3.74427	4.74092	3.0898	1.38873	3.27712	3.37473	0.347142	2.43687
1955.13	1.59701	6.0797	3.37431	5.04379	3.66658	1.38205	3.29568	3.21148	0.37534	2.53037
1966.58	1.7311	6.20391	3.64079	4.45483	4.02397	0.954665	2.23308	2.96661	0.542739	3.12756
1978.02	1.96838	6.13982	3.4929	4.89351	4.22199	0.462752	2.98942	3.07225	0.552032	3.15559
1989.47	2.062	6.03113	2.97747	5.36767	4.30133	0.888296	3.5638	2.649	0.680595	3.13569
2000.92	2.31085	6.0084	3.33259	4.79642	4.49872	1.36767	3.30001	2.09904	0.924502	3.45144
2012.36	2.23674	5.87242	2.99631	4.62765	4.82986	1.80064	3.75201	2.79281	0.762519	3.48253
2023.81	2.16732	5.95273	2.87504	4.61644	5.17315	2.15407	3.60328	2.68463	0.909067	3.5274
2035.26	2.0931	5.98785	3.31852	4.75376	5.75512	2.24574	3.67541	2.46109	0.980309	3.63225
2046.7	2.08659	6.11605	3.22036	4.56986	5.99321	2.44973	3.93221	2.89891	0.972399	3.6894
2058.15	2.07825	6.4145	3.06349	4.40241	5.9194	2.55419	3.89857	1.77011	1.13368	3.83545
2069.6	1.89234	6.35068	3.15475	4.36251	6.29124	2.78503	3.93569	1.68009	1.15076	3.90037
2081.04	2.25978	6.27202	3.10191	3.92944	6.28618	2.72409	3.8738	2.76476	1.19499	3.84467
2092.49	2.42061	6.35336	2.80121	3.77871	6.07796	2.78753	3.88052	2.41663	1.23111	3.87312
2103.94	2.2691	6.47881	3.08867	3.70667	6.79253	3.07042	3.95301	2.50817	1.20398	3.98633
2115.38	2.4656	6.60487	3.11567	3.54625	6.77445	2.91381	3.98056	2.54789	1.26309	4.21016
2126.83	2.50023	6.7008	2.84763	3.39448	6.31755	2.95963	4.11156	2.30919	1.3905	4.04156
2138.28	2.4783	6.64012	2.96303	3.2689	7.20572	3.33494	4.18938	2.57174	1.32677	3.96897
2149.73	2.45038	6.71507	2.75892	3.06236	7.4722	3.59957	4.09888	2.51207	1.49513	4.13916
2161.17	2.38686	6.84925	2.94938	2.84841	7.30119	3.02864	4.33001	2.73968	1.63537	3.94596
2172.62	2.57632	6.53012	3.26569	2.78697	7.49215	2.86586	4.20912	2.8638	1.42801	4.30997
2184.07	2.76148	6.88584	3.18162	2.695	7.32535	3.85318	4.16125	2.83238	1.59858	3.91256
2195.51	2.71819	7.24489	3.33033	2.77319	7.80285	3.998	4.33158	3.05586	1.69922	3.25003
2206.96	2.56637	6.9732	3.21626	2.76703	7.51097	3.96005	3.57661	3.16313	1.61626	3.57299
2218.41	2.39901	7.19996	3.0798	2.80889	7.48282	4.27959	4.06842	3.45121	1.8077	3.58122
2229.85	2.3796	7.05075	3.1368	3.10559	8.16048	3.89638	5.09061	3.67362	1.68634	3.57045
2241.3	2.1418	6.37126	3.06554	3.34982	7.57555	3.8452	4.63191	3.72418	1.6172	3.03212
2252.75	1.77392	6.35951	3.27723	3.52318	7.89672	3.93108	4.54258	3.76568	1.82593	3.38238
2264.19	1.76451	6.82575	3.44789	3.64339	7.94477	3.83025	4.90752	3.77401	1.70594	3.99732
2275.64	1.44095	6.94186	3.52211	3.72732	7.88858	4.30713	5.00077	3.62195	1.60447	3.61177
2287.09	1.02189	6.91104	3.66015	3.89509	7.92042	4.01912	4.89009	3.43615	1.70888	3.98723
2298.53	0.957825	6.91334	3.58218	4.16678	7.09309	3.50764	4.91866	3.55861	1.78803	3.94292
2309.98	0.835515	6.76045	3.54018	4.15719	7.90426	4.10769	5.01607	3.32242	1.93987	4.13784
2321.43	0.658782	6.99856	3.61048	4.30856	7.67001	4.4124	5.03937	3.15456	2.01458	3.94163
2332.88	0.688199	7.21651	3.72325	4.41386	6.52781	4.26335	5.16265	3.60266	2.02977	3.11494
2344.32	0.851229	6.8939	3.73904	4.04287	6.89614	4.12592	4.95592	3.59522	2.13981	3.68471
2355.77	0.762112	6.99472	3.80812	3.88208	7.26828	4.03199	5.0773	3.33971	2.18591	3.8681
2367.22	0.783941	7.10014	3.98626	3.93633	8.10953	4.23836	5.25917	3.47309	2.3164	3.8877
2378.66	0.902323	6.89776	3.74019	4.38679	7.91183	4.13401	5.15433	3.41448	2.35385	4.22257
2390.11	0.980273	6.87541	3.75276	4.37839	7.46903	3.87789	5.40929	3.28249	2.34046	3.85612
2401.56	1.14721	6.93986	4.04078	3.97896	8.09138	3.9689	5.40365	3.39253	2.4464	3.87266
2413	1.04073	7.19733	3.99822	4.57527	7.50472	3.86042	5.43381	3.38981	2.51986	3.91315
2424.45	1.05896	7.26857	4.04234	4.91905	7.73868	3.66875	5.46271	3.33107	2.61627	3.65344
2435.9	1.28659	7.15098	4.08004	4.83466	8.25731	3.85008	5.29403	3.26813	2.72187	4.08406
2447.34	1.42116	7.02989	3.88269	4.89771	7.91198	3.78299	5.51335	3.24903	2.93483	3.49416
2458.79	1.56815	6.86836	3.74511	4.91477	7.90613	3.51897	5.62581	3.26262	3.047	3.38297
2470.24	1.46305	6.86801	3.85173	4.97987	7.89232	3.61325	5.68419	3.42331	3.1848	4.68126
2481.68	1.44734	6.92571	3.84912	4.43596	8.306	3.37478	5.81699	3.75079	3.32497	4.67703
2493.13	1.67006	6.82946	3.89507	4.37568	8.02999	3.04536	5.91876	3.79298	3.23062	4.31797
2504.58	1.58421	6.74537	4.09115	4.35674	7.86447	2.92331	5.88659	3.54355	3.4401	4.05794
2516.03	1.67262	6.82965	4.0699	3.80735	8.03477	2.79126	5.90667	3.42614	3.62523	4.38545
2527.47	1.90156	6.67871	4.05574	3.78378	8.11945	2.95351	5.99362	3.63463	3.63432	4.85407
2538.92	1.83068	6.65681	3.97111	3.44519	8.15779	3.01402	5.7687	3.52458	3.67116	4.69886
2550.37	2.04871	6.8266	3.82367	3.30009	7.55495	2.99309	6.10656	3.18503	3.65749	4.89319
2561.81	2.18861	6.52517	3.80613	3.3195	8.05263	3.00741	6.15886	3.37897	3.76198	4.77447
2573.26	2.13192	6.35168	3.69587	3.04456	8.17826	3.29547	5.74013	3.26179	3.61241	4.59043
2584.71	2.3667	6.26906	3.67756	2.80322	8.13363	3.54845	6.28569	2.94124	3.62484	4.57784
2596.15	2.456	6.08864	3.58027	2.59773	8.35752	3.54903	6.54845	2.68791	3.9537	4.59972
2607.6	2.54264	6.28086	3.43019	2.68834	8.1959	3.42206	6.54941	2.47069	4.02035	4.71633
2619.05	2.63211	6.32058	3.58763	2.49162	8.09438	3.07754	6.63418	2.65884	4.18011	4.28901
2630.49	2.78498	6.08615	3.29826	2.41676	8.11827	3.42406	6.47935	2.37325	4.43896	3.83717
2641.94	3.03459	5.91423	3.06061	2.73057	9.02573	3.50481	6.61171	2.53415	4.48423	3.50102
2653.39	3.16418	6.01549	3.50464	2.8264	8.41809	3.29591	6.40057	2.95481	4.79657	2.83104
2664.84	3.49627	6.06409	3.52915	3.08238	7.93746	3.63445	6.50075	3.0487	5.10996	2.43357
2676.28	3.51755	5.99746	3.36004	3.02339	7.87579	3.57482	6.50569	3.03042	4.97442	2.48015
2687.73	3.40069	6.0688	3.44381	2.87837	7.19714	3.61347	5.83582	2.42686	5.04171	2.20619
2699.18	3.61421	5.80104	3.43082	3.08208	7.92245	3.67342	6.19257	3.10754	5.17863	2.10067
2710.62	3.7043	5.8126	3.49914	2.93696	8.29592	3.59701	6.33782	3.65819	5.18645	2.38727
2722.07	3.86244	5.77238	3.64146	2.93234	7.79194	3.85257	6.1523	3.08935	5.07919	2.32354
2733.52	3.90303	5.60564	3.6251	3.05746	7.49175	3.76944	6.41365	3.27958	4.95923	2.43663
2744.96	3.67063	5.58093	3.51621	2.99892	8.52355	3.58337	6.39717	3.33205	5.13943	2.58182
2756.41	3.81609	5.34139	3.50884	3.04886	7.24326	3.71368	6.68163	3.30152	5.19405	2.48431
2767.86	4.09399	5.6529	3.5967	3.07092	6.32065	3.63555	6.51232	3.27425	4.85586	2.70341
2779.3	3.90211	5.67946	3.58854	2.97989	8.37462	3.52925	6.09257	3.1019	4.6197	2.98001
2790.75	3.74008	5.64653	3.53161	2.95257	6.4152	3.65724	6.27985	3.11976	4.82425	3.13118
2802.2	3.89778	5.66594	3.52184	3.11615	6.54273	3.62252	6.5943	2.98547	4.91353	3.2698
2813.64	4.0677	5.41831	3.57038	3.05239	8.59017	3.45378	6.63632	3.21327	5.05822	3.29984
2825.09	4.24047	5.48794	3.67662	2.98049	7.76874	3.45302	6.55709	3.35247	5.36639	3.39832
2836.54	4.05569	5.08461	3.81852	3.04565	8.14628	3.6609	6.77804	3.49786	5.40293	3.43969
2847.99	3.84565	5.15918	3.96589	2.81619	8.18048	3.53376	6.72518	3.28476	5.41617	3.46048
2859.43	3.77405	5.54503	3.8967	2.78062	7.78556	3.56294	6.73982	2.52142	5.39996	3.59775
2870.88	3.50306	5.5354	3.90458	2.87139	8.02965	3.83009	6.88137	3.2244	5.49915	3.81655
2882.33	3.23625	5.68614	3.97744	2.93999	8.09941	3.50041	6.67048	3.84398	5.6592	3.79675
2893.77	3.0452	5.47253	3.90244	3.11514	7.42182	3.54069	6.65549	3.48568	5.5606	3.72963
2905.22	3.4558	5.31604	3.94832	3.12602	8.13813	3.67059	6.73874	3.5887	5.82401	4.41117
2916.67	3.69986	5.27854	3.9663	3.19713	8.03692	3.55986	6.47049	3.75697	6.08659	4.63266
2928.11	3.42064	5.07754	3.8363	3.24163	6.1488	3.6246	6.62382	3.98395	5.81756	4.53354
2939.56	3.67151	5.02523	3.67425	3.20322	7.39286	3.62337	6.3142	4.44993	5.76882	4.90601
2951.01	3.79714	5.09356	3.61649	3.23389	8.12511	3.7906	4.90018	4.42583	5.88	4.67287
2962.45	3.64994	5.12254	3.41673	3.31993	7.76488	3.60921	4.27976	4.25274	5.97883	4.40948
2973.9	3.87542	5.07616	3.17184	3.52093	8.17212	3.62694	3.67161	4.51192	5.80179	4.88693
2985.35	4.21901	5.16792	3.29776	3.54198	7.9492	3.84631	3.44149	4.21567	5.27053	5.29303
2996.79	4.34113	5.08806	3.13984	3.38702	7.78685	3.628	3.38356	4.14464	5.01667	5.23393
3008.24	4.40051	4.89887	3.0775	3.51287	7.36491	3.6749	2.43334	4.66289	4.84181	5.21569
3019.69	4.54797	5.13167	3.39431	3.66457	7.41095	3.58618	2.19715	4.63517	4.33646	5.11718
3031.14	4.64609	4.65713	3.21996	3.66314	7.56318	3.44011	2.02215	4.81862	3.80774	4.92251
3042.58	4.82226	4.19745	3.3037	3.73349	7.87375	3.3607	2.66902	4.89258	3.41694	4.41071
3054.03	4.93175	4.76907	3.78505	3.71579	8.26891	3.2335	3.78459	4.69058	2.92403	3.57315
3065.48	5.03122	4.83918	3.69062	3.72182	7.97798	3.37076	3.70619	5.09714	2.46888	3.28392
3076.92	5.1333	4.76602	3.68047	3.70326	8.21076	3.4716	3.79412	5.38228	2.10005	3.23848
3088.37	5.16528	4.68177	4.08698	3.55374	7.98785	3.64785	3.80621	5.21337	1.52219	2.89399
3099.82	5.40045	4.68857	4.01485	3.43935	7.1648	3.68478	3.83873	4.81008	1.01927	2.82435
3111.26	5.44904	4.87713	3.87324	3.29293	7.20165	3.70437	3.90401	4.74856	0.84962	2.693
3122.71	5.2843	4.70348	4.00598	2.9976	7.27106	3.76272	3.29874	5.41242	0.509251	1.36801
3134.16	5.21783	4.81929	4.21905	2.76899	7.01929	3.57477	2.73943	5.86702	0.216179	2.01261
3145.6	5.3611	4.83075	4.30122	2.65388	7.30278	3.57268	2.81577	5.75058	-0.0802519	3.95956
3157.05	5.22043	4.80114	3.88042	2.24278	7.2933	3.51042	3.67078	5.61279	-0.269593	3.75214
3168.5	4.39069	4.84378	3.9812	1.89731	7.43894	3.4247	3.86662	5.59537	-0.107131	3.65462
3179.94	4.3297	4.63782	4.38299	1.65429	7.40813	3.41653	3.69427	5.55956	-0.142498	4.0052
3191.39	5.01634	4.55502	4.39673	1.36127	6.95455	2.99718	4.0676	5.48229	-0.107431	3.81459
3202.84	4.98589	4.61297	4.47916	1.41079	7.81619	2.60117	3.84958	5.38075	0.00229236	3.20935
3214.29	4.63991	4.68546	4.82796	1.31761	6.33577	2.4232	3.96943	5.25282	0.478416	3.1575
3225.73	4.22305	4.66246	4.92787	1.08552	7.40313	2.10526	3.98688	5.04607	0.893243	3.40219
3237.18	3.71484	4.85594	4.6263	1.19361	7.22688	2.01231	3.53218	4.93882	1.01142	3.20927
3248.63	3.59553	4.43083	4.96061	1.38903	1.02479	2.19031	3.6775	4.58525	1.83621	3.31083
3260.07	3.82144	4.17036	4.77753	1.23191	4.54783	2.36916	3.9663	4.33359	2.11408	3.0533
3271.52	4.09412	4.90518	4.41287	1.13757	8.21607	2.48126	4.9753	4.62106	2.2019	2.91603
3282.97	3.60271	4.76915	4.47577	1.51542	6.16657	2.59485	4.89123	4.37423	2.82616	2.81091
3294.41	3.21556	4.78851	3.72032	1.89361	7.74149	2.67554	4.25206	4.33505	2.62577	2.2494
3305.86	3.57038	5.07677	3.92941	2.091	7.52358	2.79254	5.18746	4.99928	2.67247	2.28966
3317.31	3.43977	4.91646	4.35469	2.11656	7.09606	3.07835	5.34332	5.02165	3.00213	2.52585
3328.75	3.40111	5.07352	4.20334	2.13507	7.78327	2.99857	5.2202	4.91783	2.88755	2.41632
3340.2	3.50847	4.98261	4.43856	2.07526	6.15063	2.96789	5.23962	5.28373	2.98854	2.70275
3351.65	3.47075	5.20911	4.12999	2.09177	5.44097	3.03129	5.32514	5.35036	2.88761	3.08055
3363.1	3.66539	5.34604	4.30193	2.34339	7.54992	2.91147	5.266	5.52605	2.66265	3.13845
3374.54	3.72789	5.29582	4.37434	2.42649	7.97446	3.19092	4.34823	5.2619	2.56597	3.28139
3385.99	3.87872	5.42804	3.76631	2.67052	7.48672	3.33022	4.36009	4.55842	2.60002	3.24597
3397.44	4.12976	4.96766	3.95387	3.08984	7.99633	3.54752	4.0689	5.3787	2.82158	3.07233
3408.88	4.18517	5.39871	4.06913	3.45215	7.60035	3.89644	4.26484	5.81302	3.11821	2.59309
3420.33	4.17778	5.71943	4.07362	3.78761	7.62194	3.85901	4.99509	5.50525	3.46041	2.63962
3431.78	4.35252	5.29235	4.10926	3.74178	7.40527	3.96634	4.3551	5.69833	3.47323	3.26964
3443.22	4.48429	5.66624	4.01877	3.76919	6.86246	4.22204	4.37554	4.46366	3.3913	3.10552
3454.67	4.42292	5.69433	4.21145	3.9747	6.83695	4.32399	4.29522	4.42144	3.38892	2.9617
3466.12	4.55146	5.69755	3.95793	4.01679	6.54848	4.37378	3.99119	6.03441	3.32529	2.99618
3477.56	4.50547	5.881	3.86811	4.33706	6.01642	4.40033	4.2466	5.62341	3.49982	2.86979
3489.01	4.54212	5.79283	4.12734	4.49327	5.28368	4.01806	4.11899	5.87539	3.74869	2.83947
3500.46	4.76943	6.09911	3.71452	4.46544	4.95551	4.27914	4.29411	6.61508	3.94581	2.93477
3511.9	4.66045	5.83562	3.33146	4.69139	4.79142	4.71631	4.58724	6.24529	4.04626	3.33805
3523.35	4.56285	5.68726	3.32297	4.5696	5.16309	4.32922	4.66757	6.63015	3.91802	3.4241
3534.8	4.36388	6.2157	3.05724	4.43688	5.78012	5.0657	4.87346	6.54094	4.23199	3.49008
3546.25	3.88227	6.09168	2.7573	4.53576	5.60285	5.74482	5.02433	6.49593	4.48864	3.64235
3557.69	3.41394	6.25933	2.49995	4.61912	5.49117	5.43308	4.90534	6.85488	4.24617	3.57799
3569.14	3.33279	6.53458	2.11869	4.39441	5.76082	5.46243	4.51086	6.5751	4.36599	3.67997
3580.59	3.24357	6.39087	1.53874	3.55312	5.4206	5.36314	4.72172	6.28787	3.89914	3.58334
3592.03	3.00011	6.20043	1.17412	3.01628	5.44438	4.59303	4.41618	6.24319	3.3527	3.62438
3603.48	2.67432	6.00617	1.57515	2.90513	5.94711	3.58003	3.85039	6.3288	3.41302	2.87668
3614.93	1.87471	6.44005	1.65552	2.77454	5.12539	3.45703	4.75337	6.31965	2.89276	1.77521
3626.37	1.28243	6.19101	1.56786	2.72872	5.44747	3.33056	4.5811	6.25284	1.84791	2.15879
3637.82	1.03009	4.71109	1.93585	2.60951	4.62218	2.91252	4.50098	5.98444	0.617487	2.38031
3649.27	0.76775	4.05366	1.8601	2.48971	3.18734	2.90566	5.87222	5.3796	-0.104702	2.18317
3660.71	0.397472	5.41987	1.84931	2.39596	5.75396	2.73815	5.89403	4.76079	-0.538097	2.10378
3672.16	0.145221	6.67446	2.16951	2.39422	6.33954	2.61191	5.69376	4.54847	-0.8535	1.9692
3683.61	0.172315	6.35335	2.26358	2.37193	5.55287	2.36381	5.74803	4.41036	-0.859149	1.86885
3695.05	0.0723772	6.28731	2.42642	2.32713	6.14203	2.10137	5.35304	3.8685	-0.862296	1.19214
3706.5	0.160629	6.03523	2.59132	2.42326	5.96025	1.98444	5.04717	3.45256	-0.764602	0.622469
3717.95	0.257689	6.04559	2.62702	2.2492	6.12287	1.82135	4.46851	3.27911	-0.548215	0.275485
3729.4	0.392724	6.60534	2.65615	2.21469	6.37147	1.89048	3.88311	3.21147	-0.417597	0.0255641
3740.84	0.440513	5.8376	2.62811	2.31785	6.5457	1.52863	3.63867	3.30322	-0.495573	0.148869
3752.29	0.259558	5.89529	2.82436	2.37744	6.53659	1.23833	3.60048	3.28854	-0.250442	0.0747645
3763.74	0.366483	6.3614	2.93852	2.57425	6.6374	1.85691	3.6404	3.22405	-0.132848	0.168424
3775.18	0.252902	6.01803	2.76137	2.52026	6.72144	1.50758	3.7469	3.20184	-0.170953	0.362218
3786.63	0.1416	5.95287	2.93461	2.65603	6.48543	1.17725	3.98957	3.11091	0.0149971	0.365716
3798.08	0.00386118	5.5488	2.9526	2.77765	7.05437	1.73556	4.09444	3.06382	-0.0188505	0.328947
3809.52	-0.131645	5.53636	2.84783	2.85006	7.12735	1.29859	3.84765	3.13505	0.0864934	-0.0513175
3820.97	0.0481741	5.56064	3.07629	3.19231	6.42077	1.67126	4.02244	3.02172	0.117702	-0.0117606
3832.42	-0.0762641	5.37955	2.97771	3.11157	6.95968	2.21416	4.16763	2.87704	0.211542	0.419464
3843.86	-0.107726	5.50584	3.04612	3.19313	7.19865	1.89904	3.52856	2.92381	0.0931561	0.369101
3855.31	-0.00881266	5.26314	3.42042	3.5488	6.57368	2.14541	3.61491	2.65476	0.00337746	0.404142
3866.76	-0.0386339	5.14423	3.33854	3.58789	6.58853	2.15736	3.92506	2.38757	0.219779	0.399301
3878.21	-0.0628458	5.09705	3.13857	3.78641	6.5157	2.17246	3.61015	2.27077	-0.0638987	0.324825
3889.65	-0.146663	4.90289	2.71209	3.73916	6.76862	2.37791	3.25945	2.04037	0.180159	0.470751
3901.1	0.0271855	4.97907	2.64776	3.74331	6.9721	2.39753	2.67494	2.11508	0.168834	0.544917
3912.55	0.191718	4.9358	3.43394	4.16001	6.86332	2.08934	2.4923	2.22625	-0.0842107	0.74321
3923.99	0.247073	4.80327	3.53378	4.25301	7.06995	1.77918	2.65085	2.14126	0.140076	1.01863
3935.44	0.318616	4.63483	3.40729	4.38506	6.40218	1.85435	2.47744	2.17892	-0.175015	1.12862
3946.89	0.381559	4.59328	3.79784	4.62647	6.19542	1.94332	2.2774	2.36042	-0.0969575	1.27044
3958.33	0.50089	4.4583	4.04015	4.6533	6.35137	1.90463	2.46016	2.49438	0.041221	1.63299
3969.78	0.555233	4.02781	4.15211	4.64367	5.97257	1.83559	2.88079	2.63264	0.0534709	1.71005
3981.23	0.608752	4.23633	3.74726	4.66018	6.40413	2.09248	3.2113	2.77717	0.35413	1.91017
3992.67	0.583246	4.29397	3.43826	4.61238	6.12341	2.12033	3.48689	2.69642	0.513595	2.16609
4004.12	0.553603	3.93283	3.85555	4.54014	6.01804	1.93491	3.79173	2.62845	0.75167	2.25566
4015.57	0.535049	3.82544	4.07291	4.5141	6.65083	1.92415	4.16348	2.87885	0.75965	2.93613
4027.01	0.571731	3.80121	3.81008	4.51613	6.46521	1.83725	4.54264	2.97402	0.846467	3.07483
4038.46	0.548789	3.78839	3.83095	4.27863	6.33702	1.86902	4.66442	2.45856	0.913981	2.92966
4049.91	0.505536	3.52148	4.1488	3.98843	5.78298	1.89273	4.75117	2.46471	0.945484	3.05369
4061.36	0.59055	3.47818	3.57669	3.59979	5.82139	1.69417	4.52283	2.85705	1.18324	2.86378
4072.8	0.411994	3.64349	3.22418	3.06882	6.13485	1.71653	3.57165	2.7915	1.24147	2.66747
4084.25	0.614829	3.59581	3.5881	2.93052	5.7031	1.87125	3.66586	2.45392	1.40732	2.32961
4095.7	0.926876	3.26394	3.38461	2.49782	5.77032	1.78846	4.20838	1.85453	1.41683	2.00487
4107.14	0.852662	3.18165	3.35507	2.23748	5.4721	1.87589	4.07691	1.99848	1.34443	1.63553
4118.59	1.01685	3.46466	3.52333	2.21574	5.60797	1.97962	4.51115	2.10801	1.52811	1.3101
4130.04	1.20159	3.22319	3.49871	1.98014	5.99784	1.98316	4.74352	1.93493	1.53316	1.41441
4141.48	1.33417	3.11627	3.4942	2.21916	6.19142	1.957	4.77472	2.25227	1.5459	1.46453
4152.93	1.36301	3.25796	3.43203	2.14247	6.39865	1.9282	4.9643	2.26819	1.60964	1.19388
4164.38	1.43379	3.304	3.48871	2.16305	5.88436	2.06387	5.13364	2.50786	1.63427	1.12691
4175.82	1.56392	3.46017	3.61442	2.24398	6.08911	1.94918	5.46946	2.72833	1.76953	1.34427
4187.27	1.53196	3.5268	3.67587	2.07476	6.14126	1.94138	5.49269	2.84179	1.76467	1.32208
4198.72	1.6206	3.48852	3.63693	2.51747	5.81212	2.12284	5.61647	3.29809	1.8271	1.31339
4210.16	1.64273	2.93419	3.69792	2.70986	6.04888	2.11415	5.64089	3.45404	1.72657	1.25982
4221.61	1.47631	2.40144	3.52064	2.77143	5.85851	2.31906	5.36813	3.3825	1.74001	1.16675
4233.06	1.33827	2.87874	3.17663	3.01549	5.3578	2.3728	5.14228	3.18489	2.02802	1.36659
4244.51	1.34141	3.39301	3.35267	3.20307	4.45246	2.279	5.10747	3.2571	1.86669	1.1753
4255.95	1.4946	3.25861	3.32339	3.57647	3.86116	2.34064	5.15164	3.49782	1.821	1.07014
4267.4	1.41732	3.24268	3.25585	3.64123	3.97365	2.10701	4.84004	3.44448	1.85425	1.00398
4278.85	1.51606	3.10042	3.20395	3.5155	4.24784	1.99857	4.67817	3.26837	1.74984	0.754464
4290.29	1.85821	2.80756	2.96377	3.60477	4.42716	1.79575	4.53878	3.12253	1.76136	0.881345
4301.74	1.917	2.73653	3.14264	3.76338	3.96688	1.55565	4.04778	3.02997	1.80708	0.665307
4313.19	2.24659	2.39814	2.99779	3.85694	3.11134	1.57073	3.61411	2.6731	1.7514	0.666997
4324.63	2.49165	2.50548	2.8391	3.99632	1.85737	1.32692	3.47953	2.39911	1.51794	0.6759
4336.08	2.52699	2.89731	2.97814	4.28876	1.14724	1.25082	3.25784	2.29329	1.50429	0.470526
4347.53	2.67403	2.81361	3.10906	4.26628	1.55354	1.19892	2.98445	1.90541	1.39387	0.557131
4358.97	2.8099	2.85536	3.18757	4.18099	1.90308	1.20964	2.77089	1.63232	1.03724	0.441087
4370.42	2.91857	2.93817	3.24112	4.49658	2.36097	1.32514	2.61468	1.80048	0.714572	0.873996
4381.87	2.90143	2.77416	3.39156	4.44433	2.32563	1.16505	2.84465	1.98666	0.228475	1.25626
4393.31	3.08292	2.9447	3.078	4.48022	1.78374	1.31208	2.92175	1.95725	-0.14547	1.24312
4404.76	3.04713	2.96732	3.35969	4.63739	1.9326	1.64633	3.09901	2.19546	-0.385446	1.40725
4416.21	2.95136	2.35009	3.38486	4.29547	1.65943	1.86807	3.39899	2.37498	-0.340597	1.19042
4427.66	3.12503	2.63386	2.65171	4.32731	1.6802	2.06133	3.33121	2.361	-0.0247775	1.1571
4439.1	3.08366	3.06473	3.15725	4.40297	1.66128	2.05689	3.37217	2.38477	0.0660566	1.43843
4450.55	3.21945	2.92149	3.49455	4.34208	0.936193	2.16817	3.42481	2.35575	0.315633	1.60617
4462	3.53557	2.99664	3.25117	4.38551	0.984158	2.39251	3.31337	2.48024	0.39915	1.88207
4473.44	3.66218	3.07608	3.13727	4.39147	0.507216	2.36383	3.0982	2.56911	0.44626	2.02952
4484.89	3.7861	3.21853	3.09994	4.36523	0.121517	2.44719	3.3391	2.78797	0.794523	1.85415
4496.34	3.88552	3.21367	3.32671	4.30355	-0.307349	2.62661	3.13717	2.92948	0.78295	1.88467
4507.78	3.88099	3.2914	3.1741	4.01787	-1.23546	2.46325	1.90051	2.86745	1.02066	2.07333
4519.23	3.96543	3.40311	3.03771	3.18244	-0.954333	2.41327	2.14879	2.92059	1.28285	2.01658
4530.68	4.16427	3.59157	3.01321	3.04803	-0.629229	2.58109	3.02306	2.76914	1.16078	1.70693
4542.12	4.05866	3.73223	2.97725	3.38856	-0.627823	2.44194	2.91214	2.70234	1.24469	1.14201
4553.57	3.83922	3.70395	2.69695	3.17735	-0.20694	2.33119	3.06656	2.81088	1.27134	0.528797
4565.02	3.73385	3.90844	1.93809	3.02248	0.125559	2.23762	3.21305	2.73	1.19184	0.167032
4576.47	3.56506	3.86254	2.00055	2.82965	-0.112161	1.69734	2.95261	2.45354	1.14793	0.253987
4587.91	3.43432	3.83976	2.43475	2.60412	0.105401	1.44208	2.45294	2.37215	1.27997	0.19248
4599.36	3.2488	3.81434	2.24028	2.44825	0.437081	1.33066	2.28092	2.564	1.18484	0.0542623
4610.8	3.22326	3.55328	2.13743	2.28497	0.101366	0.938312	2.4742	2.43351	0.704608	0.0978922
4622.25	3.18591	3.43185	2.05065	2.34181	0.475542	0.805855	2.2903	2.46462	0.433589	-0.103733
4633.7	2.93251	3.44295	1.99198	2.3831	0.0164922	0.740399	2.38942	2.53316	0.0971244	-0.136655
4645.14	2.83532	3.40657	2.11313	2.18033	-0.572561	0.556942	2.13418	2.3548	-0.0443322	-0.137556
4656.6	2.80068	2.94004	1.66528	2.04184	0.0547916	0.528492	1.80298	2.50388	0.0501016	-0.2215
4668.04	2.87968	2.64174	1.24059	2.11709	0.00300269	0.48607	2.77713	2.48159	-0.133303	-0.22198
4679.49	2.80336	2.61745	1.64601	1.94228	-0.0331231	0.237512	3.44584	2.50671	-0.161942	-0.229508
4690.93	2.69683	2.45828	1.81973	1.79382	0.0434989	0.326166	3.66355	2.64591	-0.032008	-0.152375
4702.38	2.61227	2.32485	1.57044	1.83358	-0.0448593	0.213386	4.10974	2.45952	-0.00425955	-0.156255
4713.84	2.31163	1.94389	1.47468	1.64017	0.0368814	-0.0747283	4.22468	2.3506	0.0162959	-0.106951
4725.26	2.15294	1.7985	1.5248	1.62647	-0.0228149	0.260709	4.27338	2.20137	-0.0232135	-0.0857075
4736.73	1.81565	1.49808	1.63574	1.56126	0.0106022	0.0817969	4.12475	2.08692	0.0286369	-0.00614145
4748.16	1.53809	1.18685	1.38633	1.40217	0.000892168	-0.196577	4.1248	2.12188	0.114085	0.193274
4759.62	1.23007	1.48923	1.25058	1.49819	-0.00978028	-0.044397	4.37171	1.81393	0.0154445	0.121429
4771.07	0.910585	1.70041	1.41473	1.42687	0.0141438	-0.201153	4.19062	1.53315	-0.0142654	0.0363281
4782.49	0.973427	1.77586	1.28528	1.49686	-0.013786	-0.253811	4.11122	1.49784	0.0109696	0.100028
4793.99	0.785217	1.42293	1.21675	1.54437	0.010039	-0.238011	3.76084	1.26156	-0.00764138	0.0342078
4805.37	0.701884	1.385	1.23806	1.11905	-0.00484921	-0.270187	3.52235	1.20502	0.00449894	-0.179354
4816.88	0.642723	1.64241	1.16731	1.13073	-3.64844e-05	-0.213436	3.64457	1.43336	-0.00202565	-0.075934
4828.29	0.747884	1.38673	1.21286	1.43622	0.00346412	-0.167255	3.16299	1.23381	-0.000396129	0.145394
4839.72	1.24283	1.35694	1.40952	1.29676	-0.00500384	-0.191943	3.17674	0.749672	0.00142483	0.18506
4851.25	1.21029	1.18101	1.25724	1.13035	0.00483456	-0.217862	3.31189	0.850958	-0.00195715	0.330364
4862.55	1.3454	1.00195	1.1137	1.3901	-0.00350408	-0.0953592	3.04505	1.21744	0.00205706	0.444701
4874.19	1.59455	0.900964	1.41892	1.61864	0.00167994	-0.116647	3.19603	1.24508	-0.00166858	0.477299
4885.43	1.50954	0.643059	1.5935	1.49956	4.53926e-05	-0.078846	3.30345	1.20542	0.000940546	0.39682
4897.04	1.57244	0.801715	1.51231	1.67928	-0.00126272	0.0246103	3.11249	1.30041	-0.000139367	0.441523
4908.49	1.66837	0.447852	1.60356	1.69227	0.00177643	-0.0060964	2.43033	1.10512	-0.000481163	0.607988
4919.75	1.52455	-0.0395885	1.57834	1.52218	-0.00163567	0.00699642	2.01825	1.02967	0.000789653	0.651628
4931.79	1.30521	0.0634709	1.34635	1.69502	0.000975147	-0.0708425	1.69411	1.17012	-0.000745096	0.671376
4942.33	1.9287	0.0219172	2.37887	1.53801	-7.5435e-05	-0.0170145	0.292911	-0.105445	0.000410366	0.459144

## Sheet: plus6sep
Time	Fly1	Fly2	Fly3	Fly4	Fly5	Fly6	Fly7	Fly8	Fly9	Fly10
9.04816	5.94528e-06	1.3528e-06	-4.12438e-06	4.06298e-06	2.12457e-06	-3.68385e-06	-2.67741e-06	-1.04732e-06	8.64456e-06	-4.32126e-06
20.6654	-7.57452e-06	-4.49417e-07	3.96326e-06	-6.26525e-06	2.07369e-06	4.77315e-06	3.45941e-08	3.49277e-06	-6.79808e-06	1.78326e-06
32.0169	7.27442e-06	-9.86564e-07	-2.36885e-06	7.22901e-06	-7.31258e-06	-4.67284e-06	3.72513e-06	-5.75692e-06	1.83663e-06	2.4305e-06
43.516	-4.34173e-06	2.68292e-06	-7.08623e-07	-6.10426e-06	1.22216e-05	2.9201e-06	-7.77297e-06	6.98361e-06	5.83224e-06	-7.56841e-06
54.9464	-1.31351e-06	-4.16387e-06	4.82858e-06	2.40543e-06	-1.4971e-05	5.71878e-07	1.08343e-05	-6.3163e-06	-1.46975e-05	1.22461e-05
66.3754	8.88056e-06	4.82895e-06	-9.00698e-06	3.66893e-06	1.37102e-05	-5.32678e-06	-1.14416e-05	3.19309e-06	2.22039e-05	-1.46589e-05
77.8637	-1.65508e-05	-4.10783e-06	1.18282e-05	-1.10185e-05	-7.19712e-06	1.02339e-05	8.35949e-06	2.33645e-06	-2.51962e-05	1.30285e-05
89.2613	2.17238e-05	1.66946e-06	-1.17524e-05	1.76436e-05	-4.51964e-06	-1.36656e-05	-1.10764e-06	-9.37267e-06	2.07559e-05	-6.22605e-06
100.751	-2.15726e-05	2.36376e-06	7.59445e-06	-2.09578e-05	1.95776e-05	1.38223e-05	-9.55803e-06	1.61205e-05	-7.30557e-06	-5.5663e-06
112.171	1.39233e-05	-7.26866e-06	9.19343e-07	1.84348e-05	-3.4184e-05	-9.28081e-06	2.1389e-05	-2.01338e-05	-1.42863e-05	2.03707e-05
123.626	1.72288e-06	1.17193e-05	-1.2676e-05	-8.50335e-06	4.31162e-05	-3.58199e-07	-3.07949e-05	1.8886e-05	3.99822e-05	-3.43443e-05
135.079	-2.3317e-05	-1.39919e-05	2.49795e-05	-8.5113e-06	-4.09233e-05	1.39039e-05	3.35201e-05	-1.06077e-05	-6.26419e-05	4.23237e-05
146.511	4.59036e-05	1.23925e-05	-3.38181e-05	2.97069e-05	2.37093e-05	-2.83214e-05	-2.5832e-05	-4.78768e-06	7.31866e-05	-3.90526e-05
157.976	-6.21135e-05	-5.85296e-06	3.46967e-05	-4.95266e-05	8.87373e-06	3.90062e-05	6.02641e-06	2.49702e-05	-6.29164e-05	2.09543e-05
169.408	6.3694e-05	-5.43885e-06	-2.39842e-05	6.05635e-05	-5.20226e-05	-4.07148e-05	2.41372e-05	-4.4986e-05	2.66682e-05	1.1933e-05
180.864	-4.39836e-05	1.95781e-05	5.26435e-07	-5.53402e-05	9.52836e-05	2.91051e-05	-5.85933e-05	5.7867e-05	3.39269e-05	-5.44584e-05
192.307	8.7283e-07	-3.28809e-05	3.29204e-05	2.88574e-05	-0.000123792	-2.60957e-06	8.72611e-05	-5.61896e-05	-0.000108165	9.59949e-05
203.753	6.05656e-05	4.04098e-05	-6.90044e-05	1.86447e-05	0.000121551	-3.58636e-05	-9.784e-05	3.44422e-05	0.000176163	-0.000121813
215.204	-0.000126821	-3.71543e-05	9.63914e-05	-7.95762e-05	-7.64754e-05	7.80609e-05	7.91217e-05	8.27319e-06	-0.000211878	0.000116441
226.645	0.000177069	1.9731e-05	-0.000102008	0.000138544	-1.38035e-05	-0.000110994	-2.53108e-05	-6.59992e-05	0.000189501	-6.86922e-05
238.098	-0.000187294	1.17658e-05	7.48203e-05	-0.000174403	0.000137056	0.000119439	-5.97168e-05	0.000125106	-9.24575e-05	-2.26927e-05
249.541	0.000137229	-5.23485e-05	-1.04887e-05	0.000165158	-0.000264574	-9.02537e-05	0.000159711	-0.000165783	-7.70265e-05	0.000144458
260.989	-1.8925e-05	9.18309e-05	-8.43471e-05	-9.51867e-05	0.000354201	1.77757e-05	-0.000246477	0.000166304	0.000290824	-0.000267339
272.436	-0.000155348	-0.000116195	0.000189775	-3.67502e-05	-0.000359266	9.1107e-05	0.000284598	-0.00010974	-0.000493776	0.000349466
283.882	0.000348883	0.000110821	-0.000273921	0.000211152	0.000242773	-0.000214106	-0.000240602	-8.19613e-06	0.000611404	-0.00034552
295.331	-0.000503008	-6.51891e-05	0.000298906	-0.000385892	5.90644e-06	0.000314793	9.52839e-05	0.000172447	-0.000567503	0.000220894
306.776	0.000548209	-2.19371e-05	-0.000231335	0.000501187	-0.000356527	-0.000349215	0.000143726	-0.000345861	0.00030967	3.19502e-05
318.224	-0.000423593	0.000138319	5.56333e-05	-0.000492453	0.000731389	0.000277803	-0.000433319	0.000472874	0.000162683	-0.000379603
329.67	0.000101372	-0.000256642	0.000213077	0.00031005	-0.001012	-8.06983e-05	0.000694784	-0.000490839	-0.000776429	0.00074206
341.117	0.000390098	0.000336978	-0.000521018	5.75437e-05	0.00106202	-0.000227169	-0.000825851	0.00034814	0.00137923	-0.00100058
352.564	-0.000953154	-0.000334145	0.000777672	-0.00056256	-0.000765673	0.000586364	0.000726157	-2.55585e-05	-0.00175909	0.00102212
364.011	0.0014254	0.000210474	-0.000872149	0.00108606	7.63033e-05	-0.000894024	-0.000333482	-0.000444441	0.00169151	-0.00069937
375.458	-0.00160705	4.42161e-05	0.000703575	-0.00144707	0.000934454	0.00102037	-0.000338057	0.000964137	-0.0010119	-1.19321e-06
386.905	0.0013104	-0.000391493	-0.000221975	0.00144286	-0.00204539	-0.00084319	0.0011706	-0.00137123	-0.000302074	0.000994971
398.352	-0.000430299	0.000732931	-0.000534981	-0.000925501	0.00289686	0.000296893	-0.00194259	0.00146275	0.00205728	-0.00205865
409.799	-0.000980134	-0.000937223	0.00141278	-0.000118077	-0.00307204	0.000576446	0.00236227	-0.00106441	-0.00383336	0.00284711
421.245	0.00266005	0.000883112	-0.0021397	0.00150793	0.002235	-0.00159883	-0.00214459	0.000116024	0.0050675	-0.00296911
432.692	-0.00410895	-0.000467602	0.0024763	-0.00280181	-0.000290971	0.00247021	0.00114479	0.00131572	-0.00501248	0.00214283
444.139	0.00469119	-0.000100104	-0.00214472	0.00360997	-0.00236782	-0.00282996	0.000635091	-0.0027483	0.0032059	-0.000247485
455.586	-0.00369708	0.000605509	0.00108085	-0.00370948	0.00503954	0.00242255	-0.00292864	0.00358613	0.000555696	-0.00242759
467.033	0.00103877	-0.000762619	0.00106953	0.00358624	-0.00698906	-0.00119138	0.00543346	-0.00312974	-0.00523672	0.0054696
478.48	0.00235052	0.00188163	-0.00422432	-0.00266701	0.00845678	-0.000730966	-0.00723388	0.0022797	0.00915658	-0.00795507
489.927	-0.00693756	-0.00606647	0.00397043	-0.00335351	-0.00942615	0.00346902	0.00623055	-0.0040758	-0.0188412	0.00798267
501.374	0.00878781	6.57853e-05	-0.0116931	0.0037831	0.00365106	-0.00729588	-0.00645514	-0.00519723	0.0101593	-0.00992447
512.821	-0.0142716	-0.00916789	0.0062786	-0.0177273	-0.00173312	0.0091893	-0.00255767	-0.000111508	-0.0126242	0.000394041
524.267	0.00501555	-0.00311554	-0.0121559	0.0186809	-0.0133532	-0.0113094	0.00732584	-0.0105554	-0.0102052	0.00121677
535.714	0.000763546	-0.00817278	-0.00756327	-0.0478102	0.0251051	0.00844056	-0.0296515	-0.000462666	0.0293542	-0.022977
547.161	0.0860975	-0.00342511	0.168162	0.0995587	-0.0712923	-0.00188842	0.0607453	0.0292308	0.274144	0.0704221
558.608	0.163255	0.538171	0.530182	0.620007	0.239308	-0.0233596	0.208404	0.596148	1.071	0.188365
570.055	0.247275	1.40143	1.05249	0.913215	0.670696	0.146165	0.483324	1.39692	1.66674	0.60858
581.502	0.837871	1.75418	1.27564	1.23555	0.702001	0.185004	0.71976	1.52245	1.67995	1.03149
592.949	1.24656	1.96576	1.3346	1.73579	0.922892	0.138345	0.853837	1.51544	1.36292	1.19998
604.396	1.61669	2.33525	1.72538	2.05775	1.09731	0.192622	1.13137	1.69219	1.80269	1.49342
615.842	2.19001	2.38884	2.25588	2.41808	1.36863	0.2319	1.30328	1.90608	2.88139	1.83117
627.289	2.29266	2.5834	2.69009	2.81229	1.91676	0.28396	1.48574	2.03106	3.20468	2.19209
638.736	2.53129	3.07348	2.92203	3.10688	2.37239	0.396575	1.67496	1.99168	3.46328	2.36328
650.183	2.76819	3.1309	3.26648	3.25281	2.73904	0.610549	1.71732	2.12344	3.69583	2.67783
661.63	2.86962	2.99666	3.8521	3.47748	2.61683	0.691313	1.68613	2.18105	3.92985	2.99871
673.077	3.16202	2.81063	3.96492	4.1161	2.81371	0.749358	1.60754	2.20276	4.23709	3.04316
684.524	3.16075	2.55717	4.00482	4.53412	3.18372	0.88552	1.61063	2.14223	4.47937	3.26414
695.971	3.15067	2.6172	4.31852	4.60789	3.25578	0.66778	1.65207	2.27922	4.71604	3.4578
707.418	3.38255	2.60831	4.46046	4.77864	3.64278	0.577066	1.6057	2.31626	4.49758	3.47575
718.864	3.26767	2.52095	4.72094	5.00439	3.42253	0.708533	1.51211	1.43234	5.0641	3.5009
730.311	3.28271	2.72272	4.42919	5.40369	3.48165	0.824527	1.49589	1.49659	5.35267	3.81019
741.758	3.66433	2.68438	4.84994	5.51231	3.92331	0.59148	1.44341	2.04762	5.01385	3.9379
753.205	3.68538	2.37604	4.2126	5.03897	3.93791	0.432156	1.54224	1.84428	5.26039	4.28672
764.652	3.76378	2.44297	1.13986	4.99697	4.12929	0.926534	1.66499	1.86105	4.9818	4.51473
776.099	3.79958	2.58932	2.25907	5.44092	4.11162	0.0719646	1.59888	1.81051	5.66452	3.94269
787.546	3.75089	2.5457	4.89745	5.57927	4.0756	0.0752073	1.69583	1.81138	5.12243	4.48595
798.993	3.9469	2.57066	4.36301	5.46675	4.11844	1.20901	1.54055	1.78637	3.39482	4.54902
810.44	3.88888	2.32159	4.38683	5.40861	4.03825	0.330759	1.45043	1.76209	4.92683	3.62119
821.886	4.03126	2.10532	4.28322	5.2823	3.941	0.124553	1.60449	1.71287	5.62299	4.26445
833.333	4.09511	2.20336	3.92375	4.86394	3.73302	0.18243	1.51421	1.60317	5.13543	4.02444
844.78	3.96591	2.21586	4.30528	4.54617	3.60751	-0.15433	1.5991	1.69249	5.37026	2.51212
856.227	4.2166	2.24958	4.06391	4.50464	3.93167	0.144395	1.34975	1.44162	5.04082	1.68802
867.674	4.14529	2.36826	4.40028	4.44721	3.3764	-0.184311	1.20007	1.4337	4.99149	0.781688
879.121	4.21968	2.58894	3.96355	4.23254	2.31815	-0.155357	1.64744	1.53876	4.36099	-0.0987341
890.568	4.36039	2.69228	3.23408	3.94404	2.83617	-0.0694437	1.64005	1.39747	3.91525	-0.613699
902.015	4.01354	2.55809	3.99564	3.79666	3.10671	-0.239361	1.54443	1.58744	3.73302	-0.658578
913.462	4.04209	2.46193	3.42633	3.96354	2.79934	0.0314021	1.4881	1.51642	3.27934	-0.187811
924.908	3.88274	2.4529	3.26553	3.91373	2.64012	-0.00255962	1.40718	1.40207	3.42113	0.426032
936.355	3.50661	2.44645	3.70593	3.76509	2.27773	-0.0122414	1.51576	1.48935	3.02988	0.84542
947.802	3.44344	2.34709	3.16046	3.48687	2.088	0.0222748	1.48067	1.43554	2.73358	1.05654
959.249	3.12184	2.27905	3.35695	2.84971	1.64888	-0.0258251	1.35049	1.40967	3.06359	1.23892
970.696	3.0486	2.30391	3.50925	3.27769	1.21565	0.0258633	1.39048	1.26725	2.87405	1.0283
982.143	3.08142	2.21291	3.15752	3.98987	0.923243	-0.0196156	1.56459	1.37217	2.66494	0.681626
993.59	2.95585	2.07822	3.04486	3.50434	0.709393	0.0107241	1.4955	1.49908	2.7739	0.489375
1005.04	3.06046	2.10523	2.82417	3.23656	0.274272	-0.000105777	1.39551	1.27289	2.53108	0.0950354
1016.48	3.09909	2.18307	2.51491	3.64305	-0.295598	-0.0100156	1.23538	1.14761	2.47296	-0.0496799
1027.93	3.24296	2.06552	2.65759	3.56827	-0.212595	0.0181504	0.979252	1.13237	2.56853	-0.161065
1039.38	3.32062	1.94084	2.5844	3.268	-0.471883	-0.0244934	1.03796	1.20991	2.06764	-0.247655
1050.82	3.36934	1.80404	2.31474	3.34157	-0.819229	0.024524	1.10065	1.14143	2.26993	0.156143
1062.27	3.26832	1.65216	2.40512	3.59284	-0.296725	-0.0234142	1.25135	1.03885	2.6545	0.316656
1073.72	3.39024	1.64605	2.20673	3.61335	-0.334132	0.0105847	1.33389	1.04993	2.40032	0.291106
1085.16	3.65045	1.41915	2.15969	3.44752	-0.321137	0.0066271	1.18064	0.969576	2.46115	0.418075
1096.61	2.62836	1.27203	2.18751	3.52707	0.0246922	-0.0517977	1.25474	0.963648	2.19279	0.398743
1108.06	2.94406	1.18993	2.13974	3.52555	0.053295	0.292054	1.32099	0.934813	1.95456	0.366577
1119.51	4.13901	0.970729	2.32378	3.36442	0.556836	0.293633	1.312	0.967342	1.86968	0.39789
1130.95	3.88756	1.01251	1.69412	3.44985	0.667851	0.318589	1.3333	0.957464	1.33242	0.341821
1142.4	3.9825	1.01444	1.50489	3.45472	0.617285	0.626437	1.27716	0.900643	1.1121	0.305911
1153.85	4.13307	0.936829	1.89574	3.22481	0.671604	0.443864	1.12018	0.952298	0.733351	0.336747
1165.29	4.24975	0.934966	1.97587	3.08351	0.581772	0.359178	1.20449	0.809909	0.338261	0.265156
1176.74	4.03862	0.877834	2.13877	2.8733	0.722184	0.385083	1.42726	0.692401	0.41694	0.188758
1188.19	3.79142	0.757333	1.71974	2.68133	0.585338	0.301326	1.25832	0.720268	0.319748	0.192441
1199.63	4.01582	0.679072	1.79976	2.83018	0.471733	0.374535	1.21248	0.803258	0.349086	0.106387
1211.08	3.78496	0.806031	1.96517	2.84733	0.261926	0.210293	1.30499	0.756522	0.207494	-0.00526325
1222.53	3.77946	0.818603	1.6656	2.71749	-0.0103775	-0.0316697	1.10002	0.786263	0.0764406	-0.0265222
1233.97	3.71029	0.79349	1.74574	2.85497	0.0396666	0.00215768	0.993274	0.989091	0.231544	-0.090685
1245.42	3.45883	0.784454	1.76517	2.83635	-0.177849	0.00395838	1.1042	0.982667	-0.287034	-0.180659
1256.87	3.48879	0.685194	1.78597	2.67311	-0.245177	-0.00796424	1.20228	1.05202	-0.224074	-0.140775
1268.31	3.33132	0.842654	1.87749	2.7333	-0.24436	0.00563748	1.27379	1.024	0.349947	-0.122094
1279.76	3.13978	0.732479	1.66921	2.70003	-0.429124	-0.00599553	1.29625	1.05978	0.359901	0.0713195
1291.21	3.03812	0.536716	1.09533	2.67313	-0.21818	0.00333383	1.28049	1.11954	0.502878	0.0818214
1302.66	2.50527	0.514292	1.35493	2.76823	-0.179988	-0.00184151	1.3555	1.06071	0.593948	-0.0125839
1314.1	2.1397	0.38081	1.83583	2.89172	-0.192809	0.000697061	1.39019	1.14421	0.697129	0.626795
1325.55	2.137	0.399054	1.45371	2.99947	0.0192323	0.000485692	1.28102	1.02438	0.71903	1.07522
1337	1.98202	0.235253	1.25106	3.0075	-0.00199587	-0.00139691	1.20278	0.892974	0.736342	1.52445
1348.44	1.89558	0.143316	1.46026	3.13312	0.00159692	0.00179465	1.10261	0.95784	0.878175	1.94266
1359.89	1.786	0.123709	1.67661	3.1075	-0.00137718	-0.00164941	1.12858	1.08273	0.896508	1.8454
1371.34	1.93408	0.0541128	1.69247	3.07714	0.00187345	0.00115087	1.19492	1.01097	0.962354	2.29578
1382.78	2.02508	0.193986	1.65481	3.07592	0.00437518	-0.000521606	1.08392	1.01179	0.989463	2.61214
1394.23	1.95001	0.185834	1.70591	2.96481	-0.0121294	-5.52432e-05	1.1625	1.08121	1.01741	2.86144
1405.68	2.07102	0.222953	1.84243	3.07413	0.0242948	0.000475959	1.27106	0.994749	1.01342	3.22613
1417.12	1.92464	-0.00625921	1.89801	3.08227	-0.0513517	-0.000714974	1.31086	1.09165	0.913474	3.35914
1428.57	1.97482	-0.219363	1.75502	2.97089	0.115823	0.000793684	1.3594	1.23566	0.919775	3.67379
1440.02	2.2805	-0.0383573	1.52618	2.98101	0.214525	-0.00074601	1.42139	1.09107	0.951477	2.47332
1451.47	2.11865	-0.088816	1.67273	3.06236	-0.165759	0.00059565	1.41592	0.795686	0.869733	0.867818
1462.91	1.86801	-0.122505	1.689	2.9797	-0.258926	-0.000350614	1.30949	0.866189	0.922015	2.74312
1474.36	2.21501	-0.228079	0.869043	2.9296	0.495727	1.30667e-05	1.43767	0.959596	0.936702	4.91672
1485.81	2.48448	-0.241076	0.902873	3.05652	0.632298	0.00040108	1.43326	0.89525	0.834587	3.78516
1497.25	2.18431	0.0480081	1.49411	2.923	-0.193923	-0.000841566	1.52407	0.897784	0.863788	4.37812
1508.7	2.22361	-0.079193	1.452	2.80219	-0.00909831	0.00121236	1.64096	0.80785	0.473126	4.63649
1520.15	2.03253	-0.209034	1.81466	2.70147	0.169712	-0.00137842	1.40263	0.82025	0.0307874	1.42836
1531.59	0.980264	0.0150536	1.7216	2.48331	-0.168679	0.00119592	1.51158	0.871116	0.0580243	2.14354
1543.04	1.00813	0.0871854	1.26203	2.45201	0.0340098	-0.00056544	1.47374	0.769595	-0.109821	4.38519
1554.49	1.89692	0.0993439	1.83136	2.42735	-0.0217255	-0.0005021	1.58799	0.655021	-0.214901	5.00418
1565.93	1.71354	0.257866	2.1884	2.31202	0.00308091	0.00183001	1.86897	0.866741	-0.116694	5.40049
1577.38	1.48617	0.524054	2.25611	2.25227	0.0187596	-0.00306667	1.4775	1.0978	-0.0172475	4.43864
1588.83	1.59007	0.697487	2.50478	2.35963	-0.050989	0.0037478	1.57061	1.07877	0.239844	4.82011
1600.27	1.49721	0.922646	2.62781	2.46419	0.0922115	-0.00342457	1.73924	1.37704	0.296006	5.08829
1611.72	1.60489	1.02345	2.92928	2.23024	-0.257466	0.00189293	1.64233	1.60396	0.318198	4.56384
1623.17	1.73977	0.95454	3.00983	2.25223	-0.0888274	0.000667358	1.63922	1.67437	0.433857	4.55903
1634.62	1.96051	1.08078	3.20018	2.45503	0.00742618	-0.00380542	1.52467	2.03472	0.463212	4.24737
1646.06	1.89269	1.26161	3.42886	2.45244	0.00642937	0.00734592	1.80511	2.10725	0.677234	4.13518
1657.51	2.08553	1.56657	3.36874	2.72033	0.594853	-0.0113971	1.97907	2.09508	1.05122	4.11704
1668.96	2.55526	1.72395	3.34431	2.37495	0.614704	0.0124516	1.93003	2.47497	1.52051	4.29535
1680.4	2.18907	1.6945	3.38416	2.16997	0.74576	-0.0111103	1.99449	2.80517	1.83569	4.2917
1691.85	2.35856	1.74271	3.62728	2.62706	0.67342	0.00467098	1.99876	3.12795	1.91955	4.64044
1703.3	2.66025	1.67786	3.64788	2.48416	1.20498	0.0100327	1.96582	3.41057	2.03865	4.46377
1714.74	2.4853	1.8274	3.73529	2.58662	1.66062	-0.0423811	1.88828	2.91024	2.16097	4.04589
1726.19	2.72617	2.01543	3.92356	2.88782	1.87236	0.171384	1.93615	2.35527	2.42308	4.61238
1737.64	2.64966	2.17855	3.97841	2.95342	3.23662	0.157696	2.09751	2.73362	2.72941	4.88891
1749.08	2.53733	2.68831	4.21865	3.13985	3.13741	-0.0431695	2.12406	3.57082	3.10184	4.87129
1760.53	2.27812	3.12859	4.18666	3.41684	3.63416	-0.000642787	1.97431	4.27592	3.4463	3.78649
1771.98	1.96731	3.29534	4.13681	3.63462	3.23913	0.000196799	2.14365	4.18148	3.6642	3.61228
1783.42	2.11212	3.39909	4.2093	3.66167	2.38403	0.137278	2.30145	4.38299	3.99684	4.47486
1794.87	2.14433	3.65706	4.36789	4.02951	4.87536	0.666604	2.12174	4.77174	4.18051	4.62316
1806.32	2.3533	3.17865	4.36393	4.1247	5.23479	1.27671	2.46467	4.47381	4.3139	5.01784
1817.77	2.29397	2.81318	4.30501	3.91573	4.67713	1.54664	2.54328	5.1209	4.17223	5.06035
1829.21	2.18511	3.44878	4.54139	4.20606	4.27067	1.73362	2.44051	5.39568	4.25266	5.19062
1840.66	2.24349	3.52332	4.3127	4.1691	4.39316	2.21879	2.9817	5.02385	4.78244	5.17755
1852.11	2.09939	3.56218	4.45712	4.05928	6.19538	2.94934	2.9376	5.54432	4.79169	4.92464
1863.55	2.24518	3.72195	4.59639	4.09266	5.23924	3.58537	2.88034	5.25532	5.01742	4.96494
1875	2.25545	3.69069	4.36756	4.10971	5.25762	3.88643	3.36022	5.22067	5.3092	4.93943
1886.45	2.40281	3.82797	4.38553	4.19347	5.72994	4.36603	3.30293	5.79196	5.3134	4.95103
1897.89	2.3878	3.84404	4.22471	4.01771	5.55144	4.6881	3.14569	5.59729	5.51197	4.73005
1909.34	2.1451	3.77905	4.29751	4.11466	5.4693	3.91411	3.15883	5.68802	5.65149	4.58116
1920.79	2.1939	3.97458	4.13418	4.12363	3.34572	3.82047	3.15728	5.4597	5.63989	4.31211
1932.23	1.96486	4.23969	4.3057	3.94956	4.5822	5.16969	3.84401	5.16145	5.47182	3.97819
1943.68	1.84987	4.01611	4.68271	3.94615	4.79453	5.63697	4.34919	5.06143	5.61496	4.24607
1955.13	1.73042	4.13609	4.43271	3.89649	3.5704	5.49787	4.26564	4.79563	5.72965	4.03027
1966.58	1.6791	4.35004	4.47276	3.7608	5.41088	5.90729	4.45995	4.93154	5.61264	3.51837
1978.02	1.77383	4.28319	4.4365	3.4609	5.28731	6.18964	4.67083	4.70173	5.73993	3.81059
1989.47	1.46073	4.49999	4.13128	3.31261	5.26336	6.35098	4.89975	4.82629	5.73309	3.80951
2000.92	1.32735	4.59761	4.10628	3.07416	5.67583	6.58848	5.02573	5.30957	5.69184	3.9027
2012.36	1.4369	4.7337	3.76775	2.80594	5.25577	6.99251	5.00717	5.01552	5.7151	4.36495
2023.81	1.41692	4.79935	3.41331	2.86744	5.48186	7.42143	5.27643	4.96273	5.63178	4.19547
2035.26	1.48891	4.81208	3.60139	2.84587	5.25687	7.28723	5.54889	5.20874	5.57406	4.46136
2046.7	1.53472	4.82902	3.39157	2.87703	4.17299	7.40425	5.62259	5.22468	5.61795	4.79191
2058.15	1.57364	4.75136	3.3817	2.93826	4.17509	7.70572	5.76041	5.33437	5.72397	5.21057
2069.6	1.88324	4.77986	3.88328	3.03794	5.7141	7.73424	5.93624	5.42702	5.22357	5.0396
2081.04	2.35987	4.7398	3.83951	3.21227	5.95307	7.74358	5.9836	5.18514	5.15795	4.04589
2092.49	2.66036	4.90269	3.82653	2.98952	5.95132	7.24863	5.9831	5.19686	5.61637	4.72033
2103.94	2.59238	5.04805	4.03742	2.97017	5.85267	7.24183	6.14226	5.04381	5.31087	4.90783
2115.38	2.77435	5.09453	3.92894	2.9148	4.93288	7.38747	6.23444	4.60418	5.44908	5.07696
2126.83	3.12927	5.34367	3.85202	2.85708	5.15873	6.99282	6.15037	5.0661	5.49663	5.34152
2138.28	3.31432	5.58458	4.05917	2.92359	5.73038	7.06368	6.28769	5.20276	5.20752	4.47261
2149.73	3.42724	5.83831	4.03666	2.50793	6.18284	7.17284	6.59633	4.97258	5.4305	5.30298
2161.17	3.42018	6.1249	3.89424	2.7332	6.30905	6.61508	6.64809	5.17053	5.31281	4.65071
2172.62	3.42921	6.47066	4.06628	2.55477	6.05134	5.90954	6.62296	5.10453	5.05711	3.67763
2184.07	3.15748	6.47487	3.9777	2.39402	6.52997	5.81474	6.87427	4.94357	4.94583	5.10056
2195.51	3.06958	6.63153	3.80608	3.44493	6.63866	5.54124	6.85896	4.87433	4.8512	4.57167
2206.96	3.06952	6.92067	3.96172	3.40603	6.42763	5.52184	6.93078	4.76707	4.88192	4.26017
2218.41	2.91107	6.65517	3.90902	3.25896	6.61658	6.04935	7.46466	4.64287	4.99055	4.64438
2229.85	3.05559	6.96749	4.00136	3.42985	6.64288	5.76931	7.40367	4.8902	4.9937	3.91131
2241.3	3.00423	7.07498	4.25489	3.32506	6.61772	5.68573	7.32672	4.94653	4.92735	3.74658
2252.75	3.0523	6.98637	4.0857	3.57888	6.33624	5.93856	7.45574	4.72274	4.85741	3.29014
2264.19	3.09939	7.22318	4.00979	3.36543	6.65367	6.13128	7.24699	4.897	4.56373	3.28798
2275.64	3.06615	7.06971	4.10051	3.47315	6.64783	6.04048	7.12418	4.93233	4.74992	2.8661
2287.09	3.24153	7.55547	3.92947	3.76171	6.7927	6.03465	7.10313	4.79069	4.78862	2.00904
2298.53	3.05253	7.56519	3.98918	3.71485	7.206	6.49951	7.57731	4.6793	4.53447	2.92409
2309.98	2.91985	7.54318	3.8739	3.99321	6.42163	5.68184	7.75877	4.72443	4.57865	3.23996
2321.43	2.8927	7.52741	3.56731	4.2199	7.07216	6.11947	7.5012	4.67707	4.49975	3.07907
2332.88	2.88122	7.47007	4.24745	4.44712	6.22766	6.93917	7.21676	4.50966	4.49563	3.29318
2344.32	2.8766	8.3883	4.537	4.52325	5.49721	6.19984	6.82808	4.87775	4.34923	3.15183
2355.77	2.6593	7.80851	4.18715	4.68087	6.88285	6.83971	7.29709	4.74064	4.79892	3.64308
2367.22	2.78592	7.8926	4.70362	4.71817	5.94572	5.9075	7.34451	4.42019	4.16093	3.88448
2378.66	2.96712	8.61051	4.65027	4.53916	5.88855	5.21663	7.21087	4.71471	3.20647	3.47505
2390.11	2.835	8.66444	4.41828	4.66959	6.09117	6.8119	7.81723	4.56062	4.65394	3.06557
2401.56	2.80342	9.08731	4.89708	4.50896	5.5684	5.91986	7.56856	4.33888	5.08472	2.33105
2413	2.70143	8.93711	4.75813	4.46727	6.1535	5.22136	7.44701	4.23943	4.72644	2.08134
2424.45	2.61322	9.53509	4.81152	4.41627	6.45679	5.84758	7.6461	4.00281	5.09089	2.41032
2435.9	2.82017	8.60026	5.01211	4.25601	6.72875	5.78524	7.68296	3.88113	4.98584	2.53856
2447.34	2.71601	8.19703	5.13211	4.17035	6.32493	5.81844	7.66922	3.69846	5.09497	3.1861
2458.79	2.67289	9.7341	5.42957	4.00008	6.07433	5.54404	7.76552	3.73908	5.30893	3.8878
2470.24	2.97618	9.68151	5.13641	4.18992	6.36968	5.85007	7.72843	4.06347	5.13403	3.95269
2481.68	3.10875	10.0791	5.31902	4.11587	5.98175	5.84689	5.25989	3.80777	4.93258	4.22335
2493.13	3.06973	9.29079	5.4596	4.13687	6.16375	5.72294	4.54783	3.96266	5.02683	4.50324
2504.58	3.01427	8.93318	4.88637	4.329	6.61546	5.72567	6.2328	3.91814	5.18781	4.7115
2516.03	3.23837	10.4878	4.85549	4.10242	6.71342	5.62294	5.97951	2.90667	5.00245	5.0501
2527.47	3.06818	10.3063	5.06327	3.97048	6.8906	6.08392	5.73977	3.47723	4.70658	5.1919
2538.92	2.88299	9.94173	5.05615	3.79715	6.91552	3.96417	5.5007	4.29468	4.803	5.12811
2550.37	3.09571	9.95742	5.21355	3.75674	6.80611	4.3729	5.7627	4.31797	4.9001	5.22252
2561.81	3.22212	10.3097	5.58154	4.05146	6.72979	7.03016	6.26865	4.19072	4.76722	5.4253
2573.26	3.49462	10.5236	5.66814	4.00416	7.2345	6.25763	5.5874	4.23663	4.69276	5.41098
2584.71	3.38992	10.3539	5.92015	3.9001	7.50328	6.79389	6.03557	4.65271	4.61337	5.64514
2596.15	3.61478	10.5701	6.23433	3.81476	7.38132	6.82496	6.60111	4.39464	4.38539	5.87538
2607.6	3.79599	10.3277	6.10088	3.43856	7.60728	5.9274	6.34148	4.37088	3.90765	5.87344
2619.05	3.47507	10.3092	6.4677	3.4956	7.31092	6.48468	6.54643	4.60651	3.85753	5.85253
2630.49	3.65636	10.4247	6.60943	3.52512	6.95356	6.33772	6.54943	4.70699	3.89527	5.89127
2641.94	3.17575	10.4991	6.6156	3.58559	6.88216	6.43539	6.66643	4.755	3.78662	6.10908
2653.39	3.01083	10.3112	6.91494	3.96368	7.38269	6.46583	7.08244	4.69079	3.83392	5.579
2664.84	3.70844	9.60028	6.76489	3.81572	7.86933	5.939	7.03556	4.46253	3.59774	5.46346
2676.28	3.66408	9.85151	7.04899	3.9467	7.74897	5.37559	6.93122	4.27102	3.68604	6.17644
2687.73	3.23546	10.34	7.45536	4.20272	7.73553	4.99573	6.84602	4.78874	3.68978	6.18698
2699.18	2.96506	9.86938	7.62049	3.85507	7.58827	4.91875	7.0496	4.9916	3.61758	6.2021
2710.62	3.37721	9.60757	7.46641	3.59417	7.86311	4.47075	7.35197	4.92517	3.85612	6.05294
2722.07	3.24544	9.68506	7.0675	3.71844	7.66786	4.23034	6.77064	5.01791	3.83844	5.74557
2733.52	2.90057	9.62256	7.32388	4.19886	7.44401	4.2142	6.74335	5.08259	4.00772	5.62287
2744.96	3.25426	9.70037	7.53536	3.90674	7.84916	4.96893	7.23903	5.09761	3.94118	5.33293
2756.41	3.00369	9.61009	7.63423	3.00762	7.71601	5.01663	7.3651	4.98597	3.92833	5.3546
2767.86	2.98756	9.52165	7.6501	3.36076	7.82446	2.9553	7.15825	5.24939	4.14607	5.57946
2779.3	3.08789	9.26995	7.73967	3.52465	8.0231	3.15924	6.97565	5.38791	4.17524	5.93219
2790.75	3.12927	9.34954	8.02196	2.91474	8.36806	4.28371	7.33888	5.19689	4.21811	5.86789
2802.2	3.27329	9.12034	7.66689	2.995	8.44736	3.63727	7.51214	5.06473	4.0381	6.10053
2813.64	3.13573	8.1883	7.17043	3.09222	8.20419	3.26794	7.8296	5.05352	4.22177	6.50646
2825.09	3.17854	8.52583	6.96502	3.2021	8.37552	3.06997	7.33025	5.00917	3.95371	6.29096
2836.54	3.14749	8.66846	6.86638	3.50279	8.25582	2.25723	7.29892	5.05316	3.60044	6.86757
2847.99	3.48946	8.59213	6.76994	3.74473	8.2838	1.907	7.95248	5.12637	4.01584	6.85775
2859.43	3.62429	8.56222	7.19957	3.89309	8.51227	2.94014	7.5046	5.05035	4.18193	6.59622
2870.88	3.54341	8.2194	7.16852	3.97338	8.85638	3.01227	7.65254	5.41295	4.23664	7.2597
2882.33	3.97239	8.20494	6.96652	4.4692	9.03349	2.68093	7.60052	5.40491	4.13499	7.28061
2893.77	3.91276	8.41344	6.87538	4.77894	8.56217	3.39669	7.50873	5.11561	4.46531	7.76222
2905.22	4.23527	8.65567	6.02789	4.75601	8.13953	3.15138	7.55645	5.24243	4.22748	7.86102
2916.67	4.43413	5.56384	6.86561	4.86024	8.33129	2.72592	6.96969	4.75172	3.86274	7.455
2928.11	4.49984	4.84449	5.27121	4.86529	8.36527	3.5282	6.91222	4.75083	4.98338	7.92808
2939.56	4.38424	8.34849	3.40985	4.93886	8.2226	4.10614	6.73273	5.39555	5.38033	8.0231
2951.01	3.18514	8.34734	5.75644	5.19105	8.87754	4.09099	6.47506	5.26634	5.43741	8.27711
2962.45	3.61536	8.13536	5.55747	5.22917	9.00126	4.23328	6.26291	5.27491	5.774	7.68351
2973.9	4.1259	8.17151	5.04772	5.17405	8.93909	4.42593	6.12202	5.26344	6.05939	7.3302
2985.35	3.66153	7.30999	5.45439	5.14728	8.93557	4.1585	5.82262	5.09987	6.24602	8.12508
2996.79	3.86573	7.86742	4.8977	4.7621	8.72281	3.9457	4.92421	5.19862	5.96221	7.86236
3008.24	3.78711	7.89255	5.08382	4.37933	8.84583	4.14381	4.83396	5.24727	6.34822	7.76812
3019.69	3.70579	7.75503	5.20274	3.95546	8.2521	4.2755	4.80966	5.3387	6.65597	7.62183
3031.14	3.72848	7.75597	5.68286	3.62348	8.67478	4.03609	4.83	5.0497	6.76308	7.2312
3042.58	3.84754	7.80637	5.68861	3.42562	9.39745	3.5776	4.87536	5.1515	6.89475	6.98905
3054.03	3.7817	7.9327	5.78073	3.12746	8.90544	3.54438	4.4289	5.54412	6.76769	6.41306
3065.48	3.78778	7.77782	6.33399	2.76229	8.76057	3.6708	4.76643	5.52868	6.87678	6.03733
3076.92	4.2646	7.51826	6.20527	1.98474	8.59561	3.77076	4.77024	5.74117	6.71996	5.88134
3088.37	4.30961	6.52626	6.0741	1.91732	8.57793	3.69433	4.65444	5.45361	6.81407	5.79184
3099.82	4.23699	6.96267	6.09652	2.11081	8.93402	3.57652	4.92848	5.33769	6.64398	5.40482
3111.26	4.18805	7.66657	6.47628	2.20614	9.15042	4.23748	4.80302	5.52898	6.15664	5.05832
3122.71	4.22569	7.09137	6.29868	2.16906	8.90923	4.52102	4.96489	5.22636	6.18984	4.45196
3134.16	4.39971	7.29736	5.66524	1.67249	8.52338	4.06921	4.8188	5.41924	6.02569	3.67803
3145.6	4.29801	7.11358	5.75603	1.9484	8.62035	3.86953	4.81682	5.55007	5.83247	3.40854
3157.05	4.48241	6.75597	5.49603	2.2116	8.56085	3.54178	5.49132	5.35704	5.37333	2.90609
3168.5	4.55697	6.93299	4.81764	2.9267	8.5822	3.06811	5.2224	5.38455	5.39217	3.11277
3179.94	4.45507	7.02192	4.8263	3.26917	8.82146	2.84478	5.21131	5.65594	5.27048	3.53232
3191.39	4.66365	7.14184	5.03817	2.99598	8.69475	2.77534	5.50703	5.94465	4.60063	3.25054
3202.84	4.60942	6.96238	4.88406	3.81177	8.48	2.52928	4.75932	5.22917	5.14146	3.59266
3214.29	4.50668	6.56291	4.78738	4.01453	8.36939	2.56991	5.19201	4.34328	5.24507	3.98003
3225.73	4.43545	6.49251	4.96665	3.9817	8.29845	2.55017	5.35776	4.74685	4.58545	4.02609
3237.18	4.42332	6.59004	4.86575	3.96673	8.60474	2.2964	4.85997	5.50606	4.88022	4.25342
3248.63	4.55546	6.25799	4.83595	3.70178	8.71935	2.66264	5.76961	5.62521	4.22458	4.70856
3260.07	4.52922	6.12054	4.84423	3.77378	8.37651	2.79454	5.94959	5.3629	2.87973	4.90649
3271.52	4.4296	5.97191	4.64053	3.28276	8.47218	2.9847	5.64034	5.66591	3.83817	4.95455
3282.97	4.21115	5.89569	5.08199	3.3028	8.26729	3.29911	5.93841	5.94201	4.61136	5.36878
3294.41	4.12913	6.06034	4.70341	3.01278	7.78548	3.13386	6.11575	5.58945	4.34877	5.46745
3305.86	4.08693	5.54268	4.54795	2.26555	7.66435	3.38965	6.04931	5.8165	4.54518	5.27318
3317.31	3.91817	5.65722	4.93209	2.73602	7.86632	3.4563	5.93679	6.21891	4.61675	5.18418
3328.75	4.08253	5.83091	4.03323	2.77084	8.01323	3.16412	5.80669	5.5713	4.78918	5.29009
3340.2	4.09393	5.21803	4.44869	2.56639	7.67502	3.25775	5.77203	5.30127	4.81576	5.37545
3351.65	3.92674	5.48776	4.86741	2.52029	8.0637	3.28579	5.85107	5.99548	4.98448	5.58708
3363.1	3.98312	5.26676	4.61409	2.25308	7.66181	3.04307	5.60725	6.17036	5.1417	5.76772
3374.54	3.7842	4.66282	4.89351	2.72059	6.66745	2.96729	5.58257	6.4226	4.95066	5.20354
3385.99	3.57103	5.02534	4.56016	3.35724	7.29602	3.31497	5.54047	6.30858	5.1855	5.31006
3397.44	3.51173	5.04555	4.74038	3.37568	7.05987	3.28278	5.55489	5.84692	5.44782	5.63827
3408.88	3.26563	4.96331	4.8447	3.474	6.88154	3.31863	5.58441	6.17698	5.47427	5.81056
3420.33	3.1505	4.88493	4.76985	3.66381	7.14072	3.6959	4.9256	6.43702	5.72941	6.10879
3431.78	3.30156	4.88539	4.95706	3.42918	6.04964	3.75422	4.83718	6.5546	5.77611	6.11541
3443.22	3.44396	4.95305	4.83086	3.5173	6.26706	4.03803	4.57949	6.34521	5.88626	7.07585
3454.67	3.59177	4.50629	4.95218	3.65577	6.90458	3.82749	4.04872	6.22015	6.12595	6.88966
3466.12	3.58561	4.66172	4.77292	3.07145	6.70494	3.7874	4.06083	6.36448	5.88076	7.15185
3477.56	3.52685	5.04947	4.68309	2.84091	6.71501	4.20276	3.8249	6.30211	5.8196	7.37749
3489.01	3.66982	5.02093	4.85348	3.80023	6.47156	4.08361	3.76097	6.4109	5.58677	4.97554
3500.46	3.66169	5.18639	4.73827	4.44286	6.43468	4.08862	3.72757	6.35047	5.45354	5.79622
3511.9	3.62062	5.13911	4.92183	4.35658	6.23622	4.0733	3.88678	6.45459	6.00939	7.37361
3523.35	3.65911	5.07232	4.82418	4.33805	6.31112	3.93799	4.12966	6.419	5.99891	7.2057
3534.8	3.56071	5.08078	4.68487	4.28274	6.40156	3.77126	3.99527	6.235	5.8861	7.73465
3546.25	3.46762	4.91324	4.61146	4.39236	5.90605	3.60885	4.35443	6.55901	5.89689	7.66007
3557.69	3.56576	5.06179	4.40357	4.17572	5.9832	3.54944	4.4629	6.6193	5.25173	8.15474
3569.14	3.41227	5.19768	4.58732	3.47289	5.85633	3.65707	4.18331	6.43439	5.0233	8.05797
3580.59	3.06365	5.06049	4.36861	2.91595	5.61448	3.96675	4.38571	5.62278	5.31764	7.89962
3592.03	3.06662	4.98753	4.27289	2.45746	5.56662	3.78925	4.46792	5.20358	4.56527	8.14686
3603.48	3.00263	5.01639	4.29071	2.11745	5.22277	3.5819	4.58195	6.08113	3.90025	7.58159
3614.93	2.77462	5.02686	4.0618	1.88037	5.10764	3.84205	4.9629	6.51201	4.21888	8.11805
3626.37	2.53538	4.89086	4.32711	1.38157	5.0425	3.76918	5.27329	6.33112	3.79902	7.21468
3637.82	2.37435	4.90458	4.04991	1.02065	4.71955	3.85082	5.51097	6.04767	3.02028	6.73362
3649.27	2.23353	4.78668	4.07324	0.967925	4.52919	4.06176	5.71258	5.9709	2.74015	7.20109
3660.71	1.91821	4.7035	4.15489	0.596495	4.47226	3.84417	5.59822	5.84594	2.4398	5.86171
3672.16	1.86257	4.89898	3.31409	0.633246	4.46791	4.042	5.43701	5.87584	2.17794	6.1733
3683.61	1.99459	4.95358	3.93978	1.06457	4.34499	4.07774	5.58736	6.04995	2.24179	6.04448
3695.05	1.93594	5.05319	4.35415	1.00924	3.92331	3.9727	5.71775	5.67944	2.07796	5.02251
3706.5	1.73245	5.36145	3.69126	1.22202	4.01175	4.32599	5.83247	5.85578	1.75039	5.03777
3717.95	1.70814	5.67138	4.0197	1.64138	4.24231	4.14466	5.68905	5.75664	1.95523	3.98837
3729.4	1.93802	5.32411	4.01719	1.85995	4.2289	4.09846	5.66494	5.35656	2.05986	2.51301
3740.84	1.7404	5.28789	3.4972	2.00854	4.41735	4.24988	5.6801	5.4631	2.06004	1.50743
3752.29	1.67322	5.76571	3.34199	1.98017	4.49101	3.82377	5.47744	5.07398	2.2106	0.691043
3763.74	1.52741	5.82188	3.44321	2.32613	4.5087	3.72456	5.74039	5.27851	2.29709	0.32959
3775.18	1.07174	5.97016	3.48976	2.56031	4.52141	3.31075	5.70221	5.47432	2.32887	0.522493
3786.63	1.42803	6.19254	3.42682	2.47601	4.60496	2.59458	5.78948	5.14358	2.13837	0.705905
3798.08	1.54743	6.13953	3.61217	2.81101	4.72026	2.52892	6.23791	5.17931	2.24827	0.894023
3809.52	1.37035	6.10758	3.61827	3.02094	4.81113	2.24286	6.02531	4.9833	2.27103	1.33471
3820.97	1.48903	6.42255	3.4973	3.08604	5.11603	2.05455	6.15506	4.84995	2.00139	1.35096
3832.42	1.40674	6.42175	3.34927	3.19121	5.08461	2.06168	6.22528	4.91406	1.84276	0.686309
3843.86	1.44889	6.46319	3.04533	3.45444	4.97635	1.88557	5.98223	4.90124	1.60382	0.193781
3855.31	1.52684	6.62704	2.89607	3.35242	5.26793	1.83203	6.19769	5.17005	1.48165	0.240964
3866.76	1.47448	6.06308	2.80383	3.20227	5.26783	1.65995	6.24324	5.10589	1.07014	0.288158
3878.21	1.51644	6.07424	2.79768	3.50726	5.34282	1.59938	6.24111	4.57677	0.753887	0.48484
3889.65	1.50008	6.73253	2.82174	2.48634	5.48024	1.42527	6.18968	4.84285	0.748257	0.34495
3901.1	1.44896	6.73529	2.84771	2.53603	5.10335	1.36036	6.40112	5.04684	0.460634	-0.0965131
3912.55	1.43284	6.62257	2.7844	3.67749	5.32167	1.53151	6.38972	4.88781	0.362239	-0.0621279
3923.99	1.52643	6.69987	2.70113	3.3929	5.56726	1.5426	6.08404	4.96925	0.254796	-0.123429
3935.44	1.68958	6.73217	2.75161	3.44885	5.3751	1.75432	6.08132	4.8001	-0.058591	-0.160852
3946.89	1.62385	6.83982	2.81443	2.95656	5.70832	1.70657	5.3532	4.89469	-0.295151	0.149317
3958.33	1.61504	7.02805	3.15189	2.64829	5.50224	1.67484	5.5347	4.95913	-0.383303	-0.0916136
3969.78	1.56847	6.99588	3.40892	3.00858	5.66735	1.85223	6.31541	4.83121	-0.317286	-0.359271
3981.23	1.55196	7.07481	3.49526	2.71679	5.87295	2.01171	6.07022	4.77516	-0.241985	0.0445616
3992.67	1.8964	7.31251	3.53812	3.29574	5.83196	2.06304	6.19297	4.44981	-0.0563714	-0.0315868
4004.12	1.99471	7.13276	3.76406	3.81476	5.00147	1.60463	6.25626	4.38901	0.178749	0.0119773
4015.57	2.01212	7.0793	3.71451	3.36926	1.63861	1.49686	6.1633	4.34839	0.393824	0.0412662
4027.01	2.01129	7.28096	2.90623	3.59034	2.69889	1.25086	6.44641	4.26648	0.462197	-0.151169
4038.46	1.84435	7.09901	2.82844	4.02696	6.13819	0.58112	6.30703	4.24725	0.554796	0.348414
4049.91	1.6904	6.87983	2.82835	3.81312	5.64126	0.325576	6.02669	3.9647	0.896591	-0.0562909
4061.36	1.49187	7.04148	3.10389	3.78584	5.86232	-0.0815158	6.21358	3.93763	0.911445	0.35962
4072.8	1.40793	6.96881	4.19698	3.5975	6.00838	-0.512371	6.28198	3.64533	1.02055	1.63722
4084.25	1.18516	6.73858	4.26463	3.38431	5.57106	-0.675667	6.06105	3.49679	1.30376	1.24464
4095.7	1.16303	6.56825	4.21064	3.59349	6.01369	-0.639634	5.85681	3.58826	1.24435	1.31362
4107.14	1.26802	6.26096	4.22723	3.56741	5.88397	-0.543921	5.79117	3.2508	1.49362	1.91608
4118.59	1.04852	6.44582	4.0351	3.45024	5.99304	-0.551513	5.8121	3.38006	1.21729	1.90354
4130.04	1.15139	6.48575	4.30921	3.47376	6.21667	-0.249779	5.71447	3.01562	0.959551	2.06418
4141.48	1.18049	6.15311	4.45794	3.59579	6.20706	-0.00900737	5.14543	2.40112	1.73575	2.36693
4152.93	1.11653	6.22887	4.5757	3.5368	6.1036	-0.0321047	4.09396	2.81608	1.84536	2.26322
4164.38	1.32608	5.94338	4.5112	3.60019	5.89344	0.0663448	4.00787	2.9191	1.69205	2.56298
4175.82	1.27204	5.63125	4.59501	3.66351	5.98052	-0.0835682	4.5083	2.88505	1.95396	3.04251
4187.27	1.2263	5.52251	4.85366	3.1203	6.04635	0.115624	4.58759	3.09162	2.1435	3.09213
4198.72	1.31851	4.99175	4.56546	2.8731	6.24608	0.209631	4.60589	2.94059	2.00235	3.16868
4210.16	1.48434	4.86017	4.56445	3.294	6.27757	-0.275121	4.3469	2.97301	1.95323	3.13235
4221.61	1.69559	4.81729	4.70215	3.70657	6.20271	0.0170802	4.47174	3.09207	2.15917	3.19432
4233.06	1.73828	4.44125	4.72125	3.63579	6.35729	-0.0827946	4.57938	2.9385	1.84176	3.33526
4244.51	1.74485	4.47328	4.83076	3.57572	5.83441	-0.239979	4.50187	2.90412	2.22498	3.34677
4255.95	1.8266	4.29262	4.73118	3.72472	5.61544	0.0614482	4.89247	2.91159	2.81057	3.18537
4267.4	2.00607	3.99046	4.76517	3.56088	6.03653	-0.245955	4.6743	2.96324	2.72658	3.42482
4278.85	2.01999	4.09967	4.78698	3.64362	6.17981	-0.0803782	4.53631	3.19715	2.91715	3.48379
4290.29	1.89698	4.16788	4.6981	3.35158	6.19782	0.0411065	4.70795	3.13583	2.87127	3.07318
4301.74	1.82196	4.2831	4.44385	2.9679	5.86958	-0.0202948	4.24797	2.96884	2.96398	3.23288
4313.19	1.7254	4.2017	4.35003	3.13206	5.96012	0.0109966	4.19719	2.88957	3.09789	3.40265
4324.63	1.78817	3.99757	4.63575	2.94886	6.15914	-0.244864	4.23836	2.74012	2.96782	3.61653
4336.08	2.0087	4.13074	4.5498	2.90803	5.90392	-0.0584581	4.03936	2.82344	3.10398	3.76702
4347.53	2.12391	4.0146	4.36845	2.77954	6.18714	0.0503777	4.24255	2.76356	3.10597	3.70059
4358.97	2.14642	3.59925	4.42677	2.80528	6.39251	-0.0417225	4.18263	2.66627	3.30841	3.60706
4370.42	2.22926	3.31582	4.49045	2.2923	6.49008	0.025371	3.85872	2.85075	3.13965	3.44706
4381.87	2.32791	3.44629	4.40678	2.16417	6.52591	-0.0101979	3.97679	2.78172	2.71901	3.55793
4393.31	2.27634	3.65859	4.4155	2.882	6.45869	-0.0146655	3.8621	2.65613	3.0507	3.51798
4404.76	2.28138	3.53059	4.05641	2.32282	6.5994	0.0281745	3.77025	2.62512	3.2536	3.57498
4416.21	2.483	3.84915	3.52473	2.3282	6.38367	-0.0585889	3.90587	2.92317	3.07361	3.84771
4427.66	2.33764	4.04246	3.98812	2.40138	6.34981	0.121188	3.44408	3.33995	2.69753	3.72181
4439.1	2.35856	3.90576	4.19378	2.33736	6.5635	0.537401	3.56111	3.20318	2.17895	3.41942
4450.55	2.67242	4.05004	3.9212	2.68692	6.51484	0.633679	3.66161	3.1647	1.43234	3.33991
4462	2.57058	3.90173	3.60534	2.4497	6.45307	0.872755	3.5916	3.13161	0.734322	3.39152
4473.44	2.67474	3.98255	3.75816	2.74218	6.44712	1.31971	3.79082	3.11863	0.296056	3.53478
4484.89	3.01947	3.76675	4.1296	2.82314	6.33286	1.73294	3.29042	3.56288	-0.0882151	3.50251
4496.34	3.10733	3.85934	3.35425	2.63276	6.53018	1.94208	3.46894	3.27263	0.126839	3.17016
4507.78	2.96291	4.5159	2.98454	2.83429	6.19859	2.03127	3.64075	2.68322	0.473661	3.15183
4519.23	2.93734	3.80136	2.91867	2.89821	5.84737	2.24958	3.43424	3.17448	0.526765	3.23551
4530.68	3.05817	3.88561	2.89221	3.02223	6.46825	2.32499	3.36379	3.58497	0.563237	3.1293
4542.12	3.04187	4.24142	3.28989	3.07149	4.20456	2.61189	2.96084	3.49617	0.57576	2.99182
4553.57	3.02452	3.93297	2.62897	2.9122	2.77651	2.83501	2.62914	3.5274	0.78635	2.70985
4565.02	2.99171	4.30409	2.26845	2.6791	5.71768	2.71435	2.20969	3.43167	0.838789	2.49749
4576.47	2.92028	4.14035	2.43297	2.58048	6.59412	2.73837	1.94294	3.40554	0.701158	2.13365
4587.91	2.78247	4.14349	2.17626	2.60596	6.13096	3.03541	1.5862	3.59575	0.839508	1.59062
4599.36	2.75798	4.16673	2.18155	2.55847	6.22029	3.30239	1.55051	3.6823	1.09467	1.2676
4610.8	2.60318	4.02769	2.22102	2.59599	5.73664	3.26974	1.62751	3.40053	1.22247	0.700277
4622.25	2.36266	4.09517	2.46559	2.58574	5.65289	3.34351	1.55215	3.3771	1.24553	0.091324
4633.7	2.47544	3.81938	2.38648	2.26152	5.46465	3.38918	2.00498	3.73398	1.24478	-0.0604564
4645.14	2.41657	3.71497	2.34392	2.07888	5.19449	3.32118	2.15617	3.76383	1.21696	-0.0423805
4656.6	2.4848	3.39304	2.61026	2.10311	5.21601	3.27555	2.1164	3.65091	1.17109	0.21314
4668.04	2.66835	3.10749	2.19014	1.93634	5.37262	3.13037	2.17705	3.5247	1.16425	0.439275
4679.49	2.58295	3.26616	2.32229	1.74759	5.15468	3.07047	2.33502	3.50837	1.18938	0.518698
4690.93	2.53774	3.34193	2.54454	1.63745	4.94859	3.0187	2.31047	3.55908	1.25547	0.597919
4702.38	2.24647	3.14315	2.45105	1.64694	5.25453	3.02677	2.12144	3.47978	1.21917	0.719716
4713.84	1.81019	2.93154	2.844	1.68297	5.13325	2.64631	2.26493	3.45995	1.21138	0.842645
4725.26	1.57615	2.96304	2.65836	1.56022	4.94976	2.03173	2.0477	3.4509	1.16034	0.632608
4736.73	1.52637	2.81085	2.83843	1.50595	5.1732	1.75635	2.06091	3.32462	0.973743	1.00171
4748.16	1.43752	2.82849	3.24082	1.59621	5.3644	1.34249	2.18224	3.09713	1.12807	1.17897
4759.62	1.33862	2.86052	3.14746	1.51285	5.27672	0.896233	1.66319	2.90668	1.22721	0.630266
4771.07	1.46631	2.78192	3.31352	1.26239	5.10159	0.433453	1.81261	2.8514	1.11195	0.841387
4782.49	1.48222	2.78154	3.38798	1.30916	5.54859	0.128369	2.22227	2.77916	1.15349	0.708223
4793.99	1.56833	2.61614	3.59956	1.34005	5.73269	-0.127953	2.26242	2.68802	1.18356	0.57905
4805.37	1.84968	2.7316	3.39364	1.24846	5.44863	-0.659775	2.28196	2.53547	1.03059	0.927198
4816.88	1.87447	2.70925	3.42606	1.23719	5.29229	-0.673101	2.13224	2.39595	0.635593	0.766389
4828.29	2.01837	2.54085	3.7838	1.11344	5.10761	-0.488506	2.26232	2.60053	0.56069	0.814725
4839.72	2.11496	2.50953	3.2976	1.18141	4.92424	-0.466062	2.42205	2.66277	0.768079	0.808517
4851.25	2.06995	2.30959	3.55307	1.2143	3.6075	-0.239487	2.26522	2.70643	0.604131	0.761811
4862.55	2.31686	2.27513	3.76667	1.2157	2.33483	0.126424	2.15403	2.79391	0.458778	0.857848
4874.19	2.33948	2.13907	3.30372	1.1573	2.17071	0.214048	2.15083	2.52978	0.389412	0.758798
4885.43	2.35064	1.61561	3.65983	1.05927	0.95315	-0.0190096	1.97721	2.58143	0.226549	0.887872
4897.04	2.57465	1.40424	3.70427	1.24452	-0.42713	0.173106	1.9181	2.71127	0.0738945	0.789159
4908.49	2.50967	1.19584	3.37421	1.08185	-0.796573	0.143557	1.83397	2.57467	-0.0715107	0.833116
4919.75	2.67636	0.913348	3.44263	0.878017	-1.16279	0.0254512	1.64131	2.63121	-0.114596	1.01885
4931.79	2.88831	0.882945	3.50109	0.959965	-1.19743	0.254777	1.63138	2.71577	-0.1671	0.99522
4942.33	2.10893	0.232102	3.75113	1.10234	-1.07106	-0.0251992	0.780947	2.53655	-0.418104	2.14638
