# Supplementary material for: How spatial release from masking may fail to function in a highly directional auditory system
Source: eLife. 2017 Apr 25;6:e20731. doi: 10.7554/eLife.20731 (PMC5443663; doi:10.7554/eLife.20731)
Supplement: Figure 4—source data 5. — The target signal was presented at 76 dB SPL while the masker intensity was varied to achieve three SNRs (−6, 0, +6 dB). Masker presentation started and ended 0.5 and 4.5 s after the onset of data acquisition respectively. Signal presentation started and ended 1.0 and 4.0 s after the onset of data acquisition, respectively. Data plotted in Figure 4B (right). DOI: http://dx.doi.org/10.7554/eLife.20731.014 [file elife-20731-fig4-data5.xlsx]

## Sheet: minus6sep
Time	Fly1	Fly2	Fly3	Fly4	Fly5	Fly6	Fly7	Fly8
9.04816	-2.05562e-06	5.00934e-06	6.82443e-06	7.66269e-06	1.46332e-06	5.2167e-06	-8.87522e-06	1.83922e-05
20.6654	-1.89094e-06	-8.57242e-06	-5.94332e-06	-4.2332e-06	3.56427e-06	1.73735e-06	1.4337e-05	-2.48107e-05
32.0169	6.83588e-06	1.06708e-05	2.64546e-06	-2.08915e-06	-9.46551e-06	-1.10002e-05	-1.71411e-05	2.53618e-05
43.516	-1.14924e-05	-9.96883e-06	2.943e-06	1.03349e-05	1.45719e-05	2.03447e-05	1.52101e-05	-1.74026e-05
54.9464	1.4135e-05	5.53765e-06	-9.85375e-06	-1.84664e-05	-1.6791e-05	-2.65844e-05	-7.22949e-06	1.17663e-07
66.3754	-1.30109e-05	2.65478e-06	1.62579e-05	2.36333e-05	1.41511e-05	2.62708e-05	-6.57945e-06	2.44347e-05
77.8637	6.93261e-06	-1.33576e-05	-1.97364e-05	-2.28154e-05	-5.5302e-06	-1.67719e-05	2.38944e-05	-5.08313e-05
89.2613	4.0763e-06	2.39316e-05	1.78672e-05	1.37922e-05	-8.60107e-06	-2.47892e-06	-4.02137e-05	7.07456e-05
100.751	-1.82833e-05	-3.06788e-05	-9.05871e-06	3.75707e-06	2.56764e-05	2.89243e-05	4.94968e-05	-7.46039e-05
112.171	3.2129e-05	2.96737e-05	-6.5548e-06	-2.7349e-05	-4.10418e-05	-5.64581e-05	-4.56023e-05	5.43634e-05
123.626	-4.06907e-05	-1.80213e-05	2.64376e-05	5.13791e-05	4.86867e-05	7.6046e-05	2.43629e-05	-6.92414e-06
135.079	3.88082e-05	-4.71404e-06	-4.55221e-05	-6.77488e-05	-4.27484e-05	-7.76148e-05	1.41536e-05	-6.27362e-05
146.511	-2.27632e-05	3.53305e-05	5.68972e-05	6.76132e-05	1.95942e-05	5.30897e-05	-6.38967e-05	0.000139901
157.976	-7.83614e-06	-6.65714e-05	-5.34181e-05	-4.41182e-05	1.99946e-05	-1.26999e-08	0.000112417	-0.000201112
169.408	4.85291e-05	8.79308e-05	3.00723e-05	-4.40566e-06	-6.92455e-05	-7.52614e-05	-0.000142479	0.000218605
180.864	-8.95102e-05	-8.79155e-05	1.34009e-05	7.16992e-05	0.000115224	0.00015607	0.000136004	-0.000168069
192.307	0.000116774	5.75939e-05	-7.0431e-05	-0.000142418	-0.000140714	-0.000216875	-7.99447e-05	3.84755e-05
203.753	-0.000115188	5.25526e-06	0.000127025	0.00019362	0.000128361	0.000228354	-2.71104e-05	0.000158568
215.204	7.32391e-05	-9.2571e-05	-0.00016349	-0.000199499	-6.65972e-05	-0.000165925	0.000169579	-0.000383347
226.645	1.14837e-05	0.00018449	0.00015885	0.000139081	-4.39434e-05	2.02086e-05	-0.000313153	0.000569978
238.098	-0.000127655	-0.000251256	-9.75446e-05	-5.46896e-06	0.000185543	0.000193382	0.000408803	-0.000638172
249.541	0.000248386	0.000259342	-2.29519e-05	-0.00018589	-0.000322366	-0.000429598	-0.000403544	0.00051491
260.989	-0.000334005	-0.000181426	0.000185853	0.000393194	0.000405268	0.000616496	0.000257064	-0.000162673
272.436	0.000340383	8.40775e-06	-0.000352843	-0.000551668	-0.00038319	-0.000669106	3.9118e-05	-0.000392785
283.882	-0.000232229	0.000239843	0.00046829	0.000586283	0.000219958	0.000513248	-0.000445525	0.00104494
295.331	-1.15032e-06	-0.000509222	-0.000471028	-0.000433311	8.71277e-05	-0.000115516	0.000868419	-0.00160959
306.776	0.00033196	0.000715736	0.000312773	6.70118e-05	-0.000492549	-0.000488331	-0.00116942	0.00185598
318.224	-0.000687284	-0.000761948	2.01667e-05	0.000475606	0.000898218	0.00117687	0.00119414	-0.00156666
329.67	0.000954873	0.000564898	-0.00048745	-0.00108125	-0.00116505	-0.00174878	-0.000817955	0.000617257
341.117	-0.00100474	-9.07472e-05	0.000984521	0.00156739	0.00114288	0.00195791	6.81438e-07	0.000942621
352.564	0.000726612	-0.000612907	-0.00134912	-0.00171624	-0.000716482	-0.00157819	0.00116358	-0.00283379
364.011	-7.77297e-05	0.00139969	0.00139244	0.00133545	-0.00014014	0.000490702	-0.00241846	0.00454527
375.458	-0.000870314	-0.00203339	-0.000959176	-0.000335209	0.00131393	0.0012267	0.0033601	-0.00540769
386.905	0.00190664	0.00223177	8.61719e-06	-0.00119779	-0.00252658	-0.00323828	-0.00351582	0.00475269
398.352	-0.00269849	-0.00174128	0.00131768	0.0029574	0.00335823	0.00495917	0.00249642	-0.00215244
409.799	0.00286753	0.000440941	-0.00268299	-0.00443049	-0.00334324	-0.00565816	-0.00018493	-0.00230423
421.245	-0.00214156	0.00153843	0.00359865	0.00498942	0.00213559	0.0046501	-0.00311863	0.00779832
432.692	0.000451905	-0.00382888	-0.00366035	-0.00408576	0.000285312	-0.00167107	0.00655225	-0.0127816
444.139	0.00192576	0.00574974	0.00278996	0.0014107	-0.0034554	-0.00292506	-0.00892604	0.0152444
455.586	-0.00463652	-0.00656316	-0.00130788	0.00286921	0.00644972	0.00812566	0.00927241	-0.0133157
467.033	0.00729014	0.00528074	-0.00102929	-0.00807075	-0.0084191	-0.0129426	-0.00767955	0.00645393
478.48	-0.0084803	-0.00105769	0.00642218	0.0126865	0.00915806	0.0167138	0.00461329	0.00408095
489.927	0.0101005	-0.00191527	-0.0110761	-0.0140698	-0.00820122	-0.0137683	0.00546844	-0.0160722
501.374	-0.00419916	0.0117359	0.0172422	0.0138774	0.0046277	0.0109991	-0.0146553	0.0307872
512.821	-0.00118666	-0.0144212	-0.0202975	-0.00509192	0.00378264	-0.000182204	0.0258928	-0.0468387
524.267	0.0190599	0.0255604	0.021581	-0.00680368	-0.0135215	-0.0152908	-0.0380565	0.0463066
535.714	-0.0785175	-0.0305036	-0.0132794	0.02835	0.0352746	0.0429631	0.0549794	-0.0490517
547.161	-0.0860861	-0.144748	-0.296688	-0.0629268	-0.090972	-0.253885	-0.201157	0.0271599
558.608	-0.294818	-0.433894	-0.163028	-0.107885	0.0491169	-0.366795	-0.569217	-0.00746034
570.055	-0.555318	-0.708003	-0.00150072	-0.336749	0.0480702	-0.410921	-0.142299	-0.342545
581.502	-0.437785	-0.661954	-0.235922	-0.311	-0.372973	-0.250743	0.111793	0.825491
592.949	-0.425707	-0.871569	-0.0805023	-0.191345	-0.278001	0.206961	0.0952592	1.43703
604.396	-0.614962	-0.914077	0.265417	-0.190061	-0.298547	0.0045902	0.126911	1.01722
615.842	-0.476338	-1.11591	0.221483	0.13159	-0.419286	0.291481	0.302666	1.06234
627.289	-0.125765	-1.62067	0.260253	-0.0410348	-0.26617	0.844926	0.516683	0.632964
638.736	-0.270727	-1.36446	0.489358	-0.124506	-0.211646	1.04235	0.419605	0.503806
650.183	-0.324444	-1.16131	0.65276	0.218728	0.0203537	1.23319	0.526064	0.297958
661.63	-0.203702	-1.0617	0.818264	0.416365	-0.0453599	0.816429	0.569957	-0.334424
673.077	-0.302233	-0.704594	0.981136	0.383118	-0.225268	0.930964	0.793069	-0.459155
684.524	-0.0473551	-0.720032	0.965706	0.455672	-0.213772	1.29155	1.06025	-0.244913
695.971	0.00230627	-0.909838	1.05529	1.08632	-0.0783412	1.14995	0.980436	-0.203603
707.418	-0.113655	-0.83412	1.34452	1.09541	0.200541	1.35684	1.18805	-0.149287
718.864	0.192268	-0.636069	1.26873	0.977133	0.185251	1.30631	1.45911	-0.0437249
730.311	0.283828	-0.775474	1.3272	1.31602	0.17194	1.44821	1.97294	0.0248254
741.758	0.156668	-0.769356	1.37858	1.119	0.0566382	1.75742	2.77843	0.359288
753.205	0.319467	-0.419859	1.45236	1.21648	0.0677342	1.3903	3.03581	0.136996
764.652	0.351697	-0.424825	1.73175	1.53548	0.377568	1.31483	2.82176	0.0346895
776.099	0.163199	-0.53483	1.32917	1.31962	0.425424	1.42534	2.95237	0.470206
787.546	0.0834263	-0.472691	1.29628	1.32384	0.400976	1.3737	3.20408	0.288088
798.993	0.191312	-0.287739	1.25015	1.32549	0.404008	1.64327	3.27703	0.0187952
810.44	0.253368	-0.418289	0.976242	0.932396	0.652597	1.70304	3.6239	-0.181834
821.886	0.160211	-0.613208	1.44484	0.875535	0.623496	1.55987	3.86062	-0.145866
833.333	0.464358	-0.256278	1.14123	0.859761	0.551262	1.63779	4.06755	0.0613059
844.78	0.275837	-0.220593	0.607597	0.620583	0.912491	1.56944	4.30111	-0.0323409
856.227	-0.215696	-0.221931	0.831442	0.613193	0.928778	1.44686	4.28728	0.0110944
867.674	-0.0549431	-0.0286894	0.591041	0.707351	1.00321	1.2792	4.50797	0.00182486
879.121	-0.127448	-0.0254278	0.184321	0.745041	0.350202	1.09239	4.64033	-0.0126324
890.568	-0.164549	-0.140897	0.114755	0.588107	0.139588	1.13491	4.75017	0.022539
902.015	-0.150619	-0.353565	-0.198481	0.51797	1.2828	1.14366	4.6367	-0.0267155
913.462	0.186264	-0.267503	-0.235847	0.406974	1.33759	1.14264	4.4504	0.0291599
924.908	0.612496	-0.124244	-0.0342964	-0.182595	1.01675	1.3065	4.75259	-0.0284271
936.355	-0.0479745	-0.0340033	-0.0716518	-0.208591	1.34787	1.29147	4.6865	0.0290862
947.802	-0.148825	-0.154709	0.0944705	0.0238012	1.5426	1.20212	5.02633	-0.0366449
959.249	0.248098	-0.203139	0.0817193	-0.16314	1.54323	1.17379	5.26693	-0.253237
970.696	0.0567801	0.0924703	-0.0260897	-0.189281	1.58257	1.1717	5.12874	0.0105161
982.143	0.331421	-0.10923	0.00126056	-0.358236	1.50342	1.23635	5.50135	0.0138031
993.59	0.528816	-0.205193	-0.0586953	-0.31895	1.70865	1.21148	5.14913	-0.206421
1005.04	0.378428	0.193124	0.0372124	-0.0916984	2.03759	1.38572	5.04917	-0.11202
1016.48	0.636147	0.0715384	-0.00551213	-0.200642	1.526	1.53806	5.41932	0.0602244
1027.93	0.780133	-0.0298433	-0.0384307	-0.121224	1.1639	1.56949	5.44407	-0.015991
1039.38	0.880591	0.0867817	0.129113	-0.0528861	1.76088	1.68987	5.75538	-0.420223
1050.82	0.920851	-0.279504	-0.00396783	-0.114729	1.93794	1.57035	5.76383	-0.183854
1062.27	0.809618	-0.105244	0.114838	0.0146051	1.68136	1.54674	5.78303	0.110878
1073.72	0.934019	0.042925	0.182221	0.0801977	1.97495	1.58917	5.83227	-0.0946803
1085.16	0.733443	-0.252692	-0.104705	0.0988261	1.98789	1.51517	5.4412	0.113788
1096.61	0.743158	0.113269	-0.115267	0.211991	1.80777	1.71915	5.31888	0.191679
1108.06	1.00739	0.112613	-0.111109	0.265341	1.88405	1.66561	5.23618	0.121798
1119.51	0.851526	-0.0549316	-0.06614	0.143685	1.75401	1.64461	5.08551	0.350135
1130.95	0.815628	0.0628858	-0.0895714	0.186877	1.85753	1.96701	5.2267	0.301056
1142.4	0.889278	-0.212798	-0.0285453	0.288205	1.86204	1.82265	5.41132	0.389597
1153.85	0.80836	-0.305123	0.0852369	0.236555	1.59299	1.67067	4.98436	0.587453
1165.29	0.767062	-0.283959	0.0765332	0.284053	1.73283	1.84944	4.31771	0.298142
1176.74	0.786732	-0.320684	-0.0231713	0.142857	1.50264	1.90395	4.13116	0.31278
1188.19	0.597792	-0.305573	0.0664996	0.142955	1.33811	2.07576	3.75452	0.457046
1199.63	0.696226	-0.278833	0.395335	0.22675	1.521	2.26302	3.24374	0.416988
1211.08	0.933726	-0.289382	0.30859	0.119942	1.13898	2.10262	3.12885	0.239071
1222.53	0.840052	-0.361986	0.247493	0.207089	1.16261	2.12783	3.5815	-0.064159
1233.97	0.917275	-0.209331	-0.00720669	0.113967	0.976508	2.09665	3.46694	0.330728
1245.42	0.986358	-0.194997	0.189067	0.00404305	0.768423	2.14947	3.25655	0.34159
1256.87	1.03403	-0.211999	0.525017	0.0822841	0.866241	2.3758	4.08829	0.297096
1268.31	1.04402	-0.246675	0.0882046	0.129176	0.269308	2.1475	3.78476	0.710318
1279.76	0.978899	-0.444257	0.169212	0.0336399	0.582378	2.35652	3.76491	0.426213
1291.21	0.611013	-0.255976	0.253781	-0.106087	1.11204	2.48448	4.22362	0.4259
1302.66	0.438714	-0.172406	0.297282	0.0360765	0.874887	2.28827	4.14749	0.392923
1314.1	0.916619	-0.339846	0.262747	0.082295	0.815339	2.44955	4.31188	0.284176
1325.55	0.856639	-0.290753	0.167853	0.0650673	0.831075	2.39293	3.80721	0.367842
1337	0.770515	-0.111553	0.253021	0.221076	0.853892	2.45731	4.05386	0.350354
1348.44	0.995072	-0.0812495	0.074721	0.220348	0.686769	2.41644	4.34424	0.579091
1359.89	0.861238	-0.215605	0.0816424	0.208099	0.559699	2.4872	4.16457	0.409148
1371.34	0.978828	-0.123364	-0.31274	0.237517	0.764609	2.77203	4.53948	0.624718
1382.78	0.941488	0.0387254	-0.35944	0.334912	0.710052	2.50294	4.62549	0.920907
1394.23	0.820325	0.144484	-0.114296	0.409172	0.660304	2.46472	4.76864	0.580665
1405.68	0.868072	-0.00690382	-0.43149	0.389801	0.936357	2.6024	4.87295	0.619663
1417.12	0.512502	-0.122376	-0.446529	0.539711	0.836413	2.38611	4.98841	0.866472
1428.57	0.430418	0.110216	-0.460216	0.299393	0.878671	2.26127	5.00341	0.790824
1440.02	0.616565	-0.0527898	-0.310233	0.279136	0.997651	2.31092	5.20123	0.434583
1451.47	0.45439	0.0261236	-0.0552397	0.559323	0.641635	2.30947	5.20403	0.582876
1462.91	0.241955	0.0517888	-0.316469	0.252677	0.860777	2.31638	5.2012	0.817259
1474.36	0.397358	-0.0137301	-0.256455	0.370428	1.12766	2.11032	5.72044	0.80398
1485.81	0.429761	0.155497	0.352033	0.454773	0.96315	1.83083	4.88207	1.03037
1497.25	0.184107	-0.10148	0.607641	0.162475	1.10411	1.94654	4.94656	0.768197
1508.7	0.151094	0.134894	0.780473	0.000769148	1.15372	2.03092	5.99897	0.87224
1520.15	0.124597	-0.0103339	1.04125	-0.361474	0.954984	1.94998	5.94433	0.625559
1531.59	0.20156	-0.000437587	0.792886	-0.348935	1.02528	2.04431	5.74769	-0.0321905
1543.04	0.273995	0.110052	0.529711	-0.310426	1.21164	2.1798	5.89039	0.61382
1554.49	0.141385	-0.648732	0.201364	-0.40331	1.21596	2.09555	6.44533	0.898651
1565.93	0.221254	-0.128895	-0.314424	-0.332308	1.10061	2.0152	6.43177	0.833487
1577.38	0.27875	0.219084	-0.00240168	-0.278306	0.949869	2.15079	6.69976	0.79771
1588.83	0.22833	-0.0322618	0.0501076	-0.115606	1.01315	2.46109	7.0236	0.85762
1600.27	0.359839	0.105488	-0.389402	-0.193967	1.12684	2.58894	6.46801	1.00195
1611.72	0.363745	0.0123791	-0.366947	-0.111136	1.12088	2.5001	6.55607	0.627612
1623.17	0.317964	0.148235	-0.554858	0.0557613	1.02267	2.47246	6.62838	0.932672
1634.62	0.326091	-0.090381	-0.466612	0.0221726	0.813764	2.52219	6.47209	1.15493
1646.06	0.298125	-0.256026	-0.160996	0.0748237	0.713825	2.71596	6.82329	0.855275
1657.51	0.320882	-0.122672	-0.091739	-0.0883586	0.700936	2.44089	6.95439	0.783579
1668.96	0.266524	-0.231443	0.121592	-0.0316667	0.647379	2.43044	6.83161	0.98323
1680.4	0.264578	-0.220586	0.177156	0.0450384	0.626119	2.36678	6.74551	1.14073
1691.85	0.280791	-0.67082	0.0487892	-0.0653493	0.841849	2.01816	6.77369	0.993944
1703.3	0.318207	-1.17292	0.252118	-0.016066	1.01925	2.35875	6.07408	1.24532
1714.74	0.340239	-1.1981	0.652703	-0.0825482	0.920263	1.21044	5.64395	1.28008
1726.19	0.293955	-1.44291	0.76832	0.149145	1.02342	0.779876	6.18684	1.18039
1737.64	0.341767	-1.52	0.868947	0.356171	0.969368	1.64923	6.08637	1.24987
1749.08	0.320748	-1.40405	0.570843	0.345704	0.904749	1.79704	6.09726	1.10205
1760.53	0.37245	-1.82824	-0.360779	0.622739	1.01568	2.35441	5.82471	1.41156
1771.98	0.344901	-2.04238	-0.22359	0.579359	0.595044	2.07233	5.35828	1.73962
1783.42	0.366919	-1.81493	1.0363	0.566576	0.556073	1.97917	5.05372	1.8055
1794.87	0.567413	-1.81771	1.33118	0.746639	0.533909	2.29114	4.44425	1.38593
1806.32	0.446307	-2.2344	1.14182	0.754412	0.00875534	2.07344	4.02548	1.25444
1817.77	0.555081	-2.24163	1.9668	0.838283	0.383697	1.91713	3.26739	2.04268
1829.21	0.668043	-1.68508	1.39521	0.887338	0.82792	1.99688	3.12067	1.88061
1840.66	0.488152	-1.97252	-0.0601402	1.15252	0.849473	2.06592	3.23373	1.53163
1852.11	0.535926	-1.84727	0.982402	1.20321	0.981167	1.95351	3.4697	1.92641
1863.55	0.560897	-1.44696	2.35286	1.09463	0.720197	2.2576	3.75844	1.92182
1875	0.532282	-1.69539	2.71539	1.29259	0.591322	1.90322	3.51524	1.88831
1886.45	0.539869	-1.385	2.40524	1.38412	0.869188	1.14806	3.73687	1.8994
1897.89	0.5358	-1.47594	1.9865	1.44522	0.956466	-0.523083	3.69235	2.01423
1909.34	0.55861	-1.55634	2.12465	1.5506	0.87844	-0.821995	3.63649	2.04319
1920.79	0.452612	-1.60917	1.84301	1.69728	1.10887	1.85036	3.40149	1.83162
1932.23	0.332828	-1.96525	2.01172	1.74045	1.39574	2.12412	3.0595	2.22041
1943.68	0.43932	-1.64195	2.05766	1.49692	1.09622	1.90066	3.32683	2.17427
1955.13	0.356042	-1.55794	1.63871	1.59865	1.11894	2.10588	3.42703	1.95121
1966.58	0.220787	-1.43259	1.63964	1.85876	1.47902	1.51654	3.17114	2.09584
1978.02	0.225618	-1.47483	1.35512	1.76042	1.80698	1.91704	2.01747	2.07058
1989.47	0.215821	-1.81774	1.24284	1.71519	1.98817	1.81894	2.50514	2.49043
2000.92	0.275731	-1.56891	1.50875	1.72407	1.28926	1.82239	3.14527	2.25325
2012.36	0.203085	-1.48956	1.78502	1.59654	1.02853	2.15646	1.5105	2.02882
2023.81	0.146633	-1.35281	1.8292	1.48451	1.42862	1.98701	2.41933	2.35542
2035.26	0.230051	-1.22713	1.5454	1.63554	1.54205	1.74848	3.94368	2.06488
2046.7	0.286807	-1.20948	1.69082	1.63552	1.65416	1.87915	3.26775	2.43759
2058.15	0.193115	-1.1309	1.71018	1.52017	1.74736	1.69099	3.09671	2.74086
2069.6	0.17309	-1.23285	1.79098	1.63856	1.5474	1.73986	3.84066	2.49817
2081.04	0.210817	-1.00893	1.77744	1.58732	1.75691	1.86149	3.93132	2.49762
2092.49	0.066745	-1.07637	1.45973	1.5553	2.04597	0.408247	3.84754	2.2675
2103.94	-0.0355226	-0.775462	1.80993	1.479	1.31106	0.81645	4.79187	2.2151
2115.38	-0.179436	-0.391374	2.01232	1.31351	1.21728	1.91854	4.77394	2.24666
2126.83	-0.299896	-1.14904	1.97687	1.32486	1.92618	1.30397	4.58951	2.29157
2138.28	-0.247493	-1.50183	1.67175	1.27145	1.93188	1.53284	4.92979	2.33774
2149.73	-0.288304	-1.55051	1.69041	0.976796	1.81675	1.67348	4.63836	2.30287
2161.17	-0.255474	-1.5612	1.80978	0.646786	2.01909	1.63634	5.16054	2.26632
2172.62	-0.21913	-1.42671	1.24154	0.795553	2.04411	1.69049	5.26463	2.15922
2184.07	-0.44196	-1.73961	1.37837	0.880424	1.93446	1.64554	4.96841	2.35974
2195.51	-0.293276	-1.72398	1.38161	0.838131	2.1297	1.71273	4.88595	2.30089
2206.96	-0.0481689	-1.6641	1.39903	0.740273	2.15502	1.53079	4.65476	2.23408
2218.41	-0.00800527	-1.82879	1.1234	0.382915	1.90464	1.34441	5.3719	2.29439
2229.85	0.143555	-1.63484	0.0816596	0.540556	1.85107	1.23226	5.27422	2.18728
2241.3	0.299351	-1.66687	0.677411	0.711737	1.98009	1.25461	4.42924	2.42943
2252.75	0.518117	-1.96676	1.14399	0.685808	2.0546	0.810785	4.58137	2.04693
2264.19	0.549668	-1.93595	0.753897	0.851173	2.12541	0.695637	5.034	2.08288
2275.64	0.530644	-1.93732	0.850303	0.936728	2.29649	0.636608	5.25781	2.6008
2287.09	0.61908	-1.91345	0.837075	0.944381	2.24448	0.197944	5.18061	2.09675
2298.53	0.896121	-1.85451	0.973764	1.03533	2.30518	0.27024	5.17777	1.99274
2309.98	1.03272	-2.04522	1.45063	1.24057	2.51311	0.478718	5.1311	1.69534
2321.43	0.718389	-1.93494	1.24368	1.30003	2.38589	0.834017	4.92309	1.67379
2332.88	0.678146	-1.79584	0.560229	1.36757	2.14859	0.833549	5.01497	2.15198
2344.32	0.761593	-1.8256	0.873159	1.60151	1.92103	1.0689	4.46312	1.65148
2355.77	0.551822	-1.79724	0.470225	1.81379	2.00842	1.33943	4.20835	1.98682
2367.22	0.495871	-1.74069	0.103113	1.98782	2.2256	1.32325	4.70678	2.09662
2378.66	0.64936	-1.65887	1.33632	2.17761	2.04423	1.67696	4.25861	1.53287
2390.11	0.38256	-1.70219	1.66559	2.252	1.8178	1.65684	4.02568	1.41596
2401.56	0.136625	-1.53922	1.47381	2.30393	1.60691	1.92408	4.3741	1.09616
2413	0.302571	-1.61551	1.40277	2.32167	1.38174	1.78651	4.33121	1.0776
2424.45	0.206503	-1.7244	1.4446	2.39256	1.29086	1.27753	4.39812	1.15116
2435.9	0.0973733	-1.48715	1.87609	2.64797	1.33473	1.60512	4.31371	1.10427
2447.34	0.170522	-1.53148	1.7242	2.45719	1.28316	1.46684	3.87509	0.163307
2458.79	0.110551	-1.34451	1.70799	2.36489	1.34561	1.40941	3.98846	-0.295589
2470.24	0.20998	-1.26958	1.70414	2.52944	1.65525	1.51355	4.22168	1.0154
2481.68	0.447988	-1.32114	1.70276	2.45485	1.55962	1.29917	3.97519	1.51539
2493.13	0.340203	-0.879134	1.76766	2.53623	1.17628	1.63487	4.07836	1.35455
2504.58	0.521166	-0.830542	1.49908	2.47956	1.26947	1.29146	3.99463	1.35841
2516.03	0.957815	-1.04274	1.48548	2.54766	1.97063	1.11655	3.63046	1.52473
2527.47	0.970142	-1.11732	1.3016	2.84987	2.38459	1.70267	3.88727	1.61068
2538.92	1.15086	-1.18072	1.43117	3.0795	2.43848	1.39789	3.54292	0.708198
2550.37	1.1723	-1.15263	1.35386	3.1116	2.63456	1.52271	2.41632	1.2444
2561.81	1.41248	-1.2878	0.928478	2.18441	2.45929	1.60254	2.19957	1.45528
2573.26	1.67107	-1.52582	1.04268	1.36169	2.5918	1.71346	2.28632	0.00696039
2584.71	1.36398	-1.73025	0.540361	2.26309	2.90257	1.57563	1.71883	0.857969
2596.15	1.48182	-1.71249	0.629584	3.13255	2.47236	-0.248819	1.35217	1.39413
2607.6	1.33784	-1.63447	0.982504	2.65926	2.64323	0.45257	1.61102	0.973569
2619.05	1.22977	-1.849	0.337011	2.55673	2.66366	2.49724	1.56487	1.22033
2630.49	1.26371	-1.82749	0.794392	2.42606	2.51826	2.29032	1.08237	0.709031
2641.94	1.04218	-1.64497	0.580976	1.61478	2.90782	2.19748	1.351	0.793222
2653.39	0.980379	-1.79215	-0.369754	1.27751	2.13204	2.41137	1.33552	0.673141
2664.84	0.665979	-2.43411	0.593925	1.19858	2.17548	2.60282	1.36754	0.212861
2676.28	0.587889	-2.48068	0.743986	0.954239	2.56107	3.04597	1.87536	0.202701
2687.73	0.533873	-1.80415	0.318657	0.700371	2.18949	2.64262	1.63601	-0.367511
2699.18	0.471643	-2.21648	0.947692	0.551593	2.92909	2.93413	1.86806	-0.485763
2710.62	0.484711	-2.55974	1.13727	0.534812	2.48776	2.99027	1.81474	-0.614269
2722.07	0.470685	-2.50645	1.54772	0.424538	1.44284	0.393038	1.79956	-0.790045
2733.52	0.667005	-2.48373	1.47185	0.378187	1.85327	0.0872855	2.06634	-0.588841
2744.96	0.518158	-2.34476	1.13514	0.529288	2.28667	2.13281	1.59575	-0.960912
2756.41	0.521607	-2.62068	1.61499	0.463993	2.54515	2.48284	2.00317	-1.02638
2767.86	0.522544	-2.50069	1.53964	0.617051	2.23197	2.76581	2.32775	-0.731067
2779.3	0.258924	-2.56881	1.5875	0.850966	1.47552	2.91628	1.94255	-0.723451
2790.75	0.226636	-2.54745	1.59252	0.591089	1.22451	2.61033	2.06047	-0.556616
2802.2	0.326294	-2.46128	1.55338	0.395095	1.33053	2.43588	2.56052	-0.425852
2813.64	0.54761	-2.89273	1.79102	0.248133	1.73241	2.65043	2.66361	-0.378004
2825.09	0.577168	-3.01872	1.50766	0.488697	2.07625	2.67573	2.90027	0.0370878
2836.54	0.435648	-3.10351	1.78425	0.984111	2.28954	2.41253	3.61374	0.206727
2847.99	0.523644	-2.6704	1.90533	1.0629	2.25266	2.43041	3.56699	-0.0959004
2859.43	0.627107	-2.33289	1.67903	1.30039	2.32425	1.95352	3.93214	0.0481028
2870.88	0.560933	-2.28008	2.11843	1.39592	2.19762	1.81564	4.19463	0.265448
2882.33	0.719896	-2.0271	2.2015	1.34302	1.82481	1.81834	3.86615	0.305226
2893.77	0.561686	-2.08427	2.17135	1.81622	1.90772	1.5136	4.00327	0.623474
2905.22	0.439476	-1.97067	2.23062	2.12537	2.12435	1.65182	3.81067	0.678716
2916.67	0.611829	-2.0653	2.02557	2.13395	1.84584	1.84597	4.58357	0.55468
2928.11	0.457689	-1.8837	1.79394	2.31536	1.03942	1.72317	4.58259	0.620466
2939.56	0.615138	-1.73576	1.32731	2.16088	1.43019	1.62233	4.00137	0.742396
2951.01	0.353792	-1.81657	1.04874	2.11779	1.52154	1.64109	5.02247	0.659207
2962.45	0.0265821	-1.65708	1.05626	2.07923	1.05246	1.45938	5.08868	0.527209
2973.9	0.235783	-1.94316	0.931512	1.6292	1.45887	1.88057	4.98682	0.421373
2985.35	0.058337	-1.66845	0.796696	2.16843	0.949883	2.10055	5.05087	0.456105
2996.79	0.0907564	-1.4961	0.869827	2.72987	0.844685	1.61884	4.6025	0.831995
3008.24	0.146603	-1.55658	0.864275	2.61387	1.31858	1.85677	4.48462	0.714005
3019.69	-0.0944477	-1.53279	0.837235	2.54578	1.43012	1.7105	4.53166	0.444275
3031.14	-0.122265	-1.71587	1.04066	2.05109	1.58831	0.96554	4.49441	0.347711
3042.58	-0.193761	-1.46479	0.922478	1.78377	1.49857	1.32953	4.33382	0.223336
3054.03	-0.230932	-1.52832	1.17055	1.56433	1.61452	1.83458	4.17878	0.294891
3065.48	-0.134845	-1.01591	1.5328	1.43177	1.60575	1.63795	3.74947	0.238305
3076.92	-0.162559	-0.750045	1.40738	1.76604	1.6609	1.45714	3.75731	0.3451
3088.37	0.131646	-1.38367	1.67608	1.68649	1.64086	1.44009	3.64163	0.21834
3099.82	0.40601	-0.915082	1.58194	1.55619	1.51208	1.38137	3.28998	0.153032
3111.26	0.230698	-0.504532	1.6351	1.6059	1.57476	1.23151	3.33724	0.344733
3122.71	0.512625	-0.75459	1.39768	1.50237	1.54996	1.26285	3.09949	0.043771
3134.16	0.865188	-1.10445	1.09027	1.29213	1.8603	1.16453	3.30418	0.295053
3145.6	1.19889	-1.10728	2.30059	1.26379	1.73656	1.12275	3.38751	0.41313
3157.05	1.334	-0.730103	2.08288	1.40389	1.7035	1.09144	3.19829	0.243075
3168.5	0.77227	-1.02018	1.43046	1.558	2.27165	0.775889	3.59066	0.375622
3179.94	1.06746	-1.25917	2.06228	1.71554	2.11371	1.10236	3.64521	0.172919
3191.39	1.45427	-1.41207	1.92478	1.73733	2.07169	1.37883	3.45266	0.25796
3202.84	1.29503	-1.65896	1.70007	1.54445	1.90015	1.44781	3.64232	0.327813
3214.29	1.45003	-1.68455	1.67435	1.6609	1.56566	1.9264	3.89125	0.503706
3225.73	1.45031	-1.95362	1.64171	1.84019	2.17263	2.13389	3.81361	0.710432
3237.18	1.5269	-1.9402	1.62631	1.71541	2.40847	1.93834	3.78944	0.687407
3248.63	1.38004	-1.83768	1.38696	1.98638	2.03332	1.61536	3.8294	0.516997
3260.07	1.38353	-2.09616	1.00223	1.65911	1.64601	1.98796	3.35996	0.266899
3271.52	1.46898	-2.30856	0.830604	1.27081	1.69752	2.30794	3.23637	0.47108
3282.97	1.25279	-2.24589	0.925579	1.79487	1.97414	2.32199	3.16645	0.103995
3294.41	1.52917	-2.27255	0.866718	2.23912	2.04651	2.71397	2.86567	0.0477318
3305.86	1.55564	-2.42215	0.946899	2.35356	2.30944	3.03991	3.06476	0.629115
3317.31	1.59635	-2.2247	0.855561	2.03813	2.32088	3.20209	3.0299	0.834466
3328.75	1.68191	-1.84822	0.604124	2.26129	2.54018	2.91479	2.77021	1.07508
3340.2	1.50043	-1.85126	0.589308	2.54288	2.78475	3.16081	2.60001	1.10456
3351.65	1.38567	-2.29728	0.694276	2.20361	2.51133	3.53797	2.61188	0.867451
3363.1	1.24713	-2.10799	0.792692	1.82295	2.81718	3.13476	2.62021	1.12653
3374.54	1.50717	-1.75909	0.655496	1.81188	3.19849	3.18536	2.4101	1.23118
3385.99	1.33172	-2.06354	0.762315	2.19516	2.94614	3.15303	2.48854	0.864526
3397.44	0.993367	-1.93373	1.31494	2.02391	3.02617	3.03872	2.70505	1.17507
3408.88	1.05933	-1.46226	1.64319	1.916	3.41065	3.38663	2.8835	1.07753
3420.33	0.912964	-1.45384	1.71984	2.2055	3.43536	3.06594	2.90237	0.939813
3431.78	0.692892	-1.4517	1.78034	2.26896	3.59205	2.60019	2.98392	1.34943
3443.22	0.689378	-1.31692	1.69868	2.24435	3.59034	2.84056	3.04363	1.21058
3454.67	0.904623	-1.31894	1.73291	2.19723	3.53135	3.14719	2.89789	1.14774
3466.12	0.846312	-1.419	1.89405	1.9439	3.71333	2.83115	3.07839	1.1735
3477.56	0.922931	-1.58324	1.66134	1.81709	3.30067	2.28528	3.13063	1.31998
3489.01	0.910795	-1.42	1.61455	1.8086	3.59534	2.49907	3.16441	1.90907
3500.46	0.424421	-1.4784	1.75306	1.64595	3.61131	2.43411	3.42537	2.04145
3511.9	0.436388	-1.2815	1.46696	1.74895	2.76265	1.89455	3.28759	1.80952
3523.35	0.74023	-0.993451	1.36291	1.83209	3.31894	1.98116	2.89728	2.00534
3534.8	0.815018	-1.67275	1.49812	1.73243	3.45196	1.94463	3.14301	1.96006
3546.25	0.709161	-1.76271	1.4982	1.24534	3.09155	1.83392	3.3969	1.83587
3557.69	0.760693	-1.74752	1.28907	1.07679	3.3287	1.76199	3.17202	1.8752
3569.14	0.876769	-1.85654	1.19709	1.52373	3.13336	1.26067	3.44018	1.49591
3580.59	0.654044	-1.57067	1.17692	1.4183	3.09424	0.917428	3.01755	1.61777
3592.03	0.57352	-1.61545	1.0715	1.48378	2.92851	0.805346	2.60159	1.53965
3603.48	0.573453	-1.7807	1.37215	1.67697	2.65553	0.996737	3.32371	0.862062
3614.93	0.273255	-1.90815	0.826694	1.33066	2.44296	1.28561	2.83708	0.648216
3626.37	0.0581172	-1.82477	0.447887	1.01433	1.84976	1.17922	2.16611	0.495394
3637.82	0.0241385	-2.18452	1.18304	0.942382	1.7776	1.38952	2.75043	0.476187
3649.27	0.0254547	-2.57631	0.985227	0.921082	1.66322	1.2359	3.24573	0.646785
3660.71	-0.0354556	-1.85083	0.821816	0.916755	1.16999	1.16438	3.56865	0.554514
3672.16	-0.171577	-1.63427	0.966038	1.02256	1.03213	1.7409	3.98596	0.187779
3683.61	-0.046052	-2.61203	0.94633	1.137	0.957084	1.59554	3.92125	0.100459
3695.05	0.17846	-2.5598	1.00302	1.28916	1.02856	1.55022	3.45964	-0.125514
3706.5	0.193592	-2.37255	1.12866	1.3591	1.17914	1.60798	3.9964	-0.289979
3717.95	0.212306	-2.28929	1.12005	1.46708	1.11202	1.04346	4.51418	-0.0682991
3729.4	0.462303	-1.69056	0.591703	1.37722	0.867827	0.691089	4.25133	-0.32901
3740.84	0.594128	-2.48905	0.759319	0.960574	0.714697	0.998126	4.62676	-0.147393
3752.29	0.582128	-2.32571	0.565837	0.962671	0.561329	1.2627	4.70031	-0.0589648
3763.74	0.725644	-1.74291	0.3016	0.956116	0.420863	0.971576	4.35917	-0.276553
3775.18	0.601596	-2.29353	0.682561	0.64473	0.533763	0.939675	4.16939	-0.101042
3786.63	0.342027	-1.84132	0.413475	0.540584	0.725941	1.423	4.23447	-0.192623
3798.08	0.229493	-1.79275	0.550302	0.558926	0.995484	1.50699	5.17115	-0.126872
3809.52	0.263937	-1.84736	0.583741	0.658214	1.19813	1.44646	4.5563	0.105629
3820.97	0.500112	-1.67446	0.63077	0.901045	1.29212	1.58404	3.76093	0.166431
3832.42	0.468471	-1.77239	0.999227	0.837586	1.39181	1.40158	4.56753	0.101339
3843.86	0.42505	-1.74343	0.869503	0.690028	1.46055	1.16163	3.61737	-0.120913
3855.31	0.545617	-1.66436	0.906148	1.01737	1.39256	1.24125	3.78461	-0.205314
3866.76	0.54253	-1.38251	1.09732	1.10477	1.44861	1.16606	4.74729	0.0160947
3878.21	0.673103	-1.76712	1.04644	0.88489	1.64656	-0.19889	3.64787	-0.00591842
3889.65	0.720974	-1.67938	0.709372	1.21824	1.56304	-0.429591	3.89821	-0.244354
3901.1	0.622715	-1.63089	1.01274	1.4579	1.50866	1.30892	4.72378	-0.0403128
3912.55	0.542325	-2.01855	1.00582	1.47561	1.66633	1.45004	4.49437	0.04746
3923.99	0.401172	-1.68651	0.664433	1.44484	1.76979	1.29057	3.92075	-0.276057
3935.44	0.561895	-1.76897	0.867911	1.02763	1.73566	1.46709	4.12705	-0.377037
3946.89	0.84258	-1.82281	0.562844	1.37856	1.79709	1.27687	4.40016	-0.187452
3958.33	0.784774	-2.03298	0.806365	1.49467	1.92324	1.60186	3.47542	0.00519519
3969.78	0.68238	-2.23589	1.24413	1.03961	1.92793	1.19566	3.28361	0.0324015
3981.23	0.833319	-1.97255	1.3333	1.37546	2.04762	1.54779	3.31298	-0.101704
3992.67	0.899896	-1.84401	1.3448	1.27454	1.98356	2.16491	2.71767	-0.197269
4004.12	0.727219	-1.6783	1.22988	0.966085	2.0265	1.44819	2.31454	-0.049754
4015.57	0.762248	-1.66619	1.54285	0.887308	2.16042	1.54244	1.5694	0.297429
4027.01	0.689476	-1.40486	1.52711	0.652144	1.95693	1.68785	0.742349	0.542994
4038.46	0.587587	-1.56209	1.49905	0.622252	2.11168	1.66013	0.620279	0.740807
4049.91	0.685571	-2.00612	1.67932	0.600385	2.31536	2.05535	0.713442	1.00632
4061.36	0.457506	-1.56931	1.67528	0.699079	2.13714	2.00191	0.849889	1.14826
4072.8	0.56598	-1.47031	1.62977	0.576051	1.93259	1.65719	1.1323	1.23492
4084.25	0.80952	-1.60225	1.61788	0.498831	1.76247	1.29266	1.17577	1.30166
4095.7	0.655168	-1.31952	1.85102	0.74567	1.56848	1.4098	1.075	1.20722
4107.14	0.763862	-1.47076	1.83956	0.69684	1.32363	1.63452	1.06975	1.24118
4118.59	0.761185	-1.46411	1.58429	0.72956	1.3153	1.74747	1.17933	1.09198
4130.04	0.572638	-1.46798	1.64029	1.08037	1.53992	1.62627	0.987433	0.609519
4141.48	0.671967	-1.54911	1.82178	1.0852	1.51465	1.48721	0.806613	0.924091
4152.93	0.642052	-1.30164	1.71082	0.870813	1.26245	1.78172	0.959772	0.99706
4164.38	0.624656	-1.70539	1.49215	1.00725	1.03324	1.44012	1.02467	0.887822
4175.82	0.791146	-1.54667	1.23856	1.23957	0.737541	1.34206	0.971634	1.31854
4187.27	0.668803	-1.04518	0.746149	1.4233	0.475354	1.82437	0.966887	0.695226
4198.72	0.509685	-1.48149	0.658342	1.53429	0.339659	1.86365	1.24406	0.496668
4210.16	0.575703	-1.62241	0.906604	1.19971	0.427643	1.76003	1.22158	1.01285
4221.61	0.455176	-1.20075	0.768236	0.997847	0.759909	1.64319	1.06849	1.02637
4233.06	0.403156	-0.696177	0.561424	1.34797	1.01551	1.84206	1.38357	1.30954
4244.51	0.505798	-0.971914	0.370604	1.09728	0.979428	2.17057	1.65135	1.20846
4255.95	0.362537	-1.42638	0.649075	0.875119	1.00275	2.03698	1.49112	0.837891
4267.4	0.435525	-1.23348	1.19351	1.32637	1.02874	1.80705	1.3352	0.626534
4278.85	0.382836	-1.22315	0.832452	1.42472	1.07034	1.69587	1.4646	0.358366
4290.29	0.249421	-1.0923	0.784688	1.30343	1.13827	1.81267	1.62931	0.415695
4301.74	0.362682	-1.21207	0.949921	1.34334	0.787214	1.96142	1.80115	0.276057
4313.19	0.336064	-1.15756	0.736798	1.23104	0.978215	1.73973	1.47163	0.172487
4324.63	0.532916	-0.229499	0.993578	1.01795	1.03375	1.97809	0.965184	0.330107
4336.08	0.436959	-0.633309	1.01466	1.09711	0.756903	1.7968	1.178	0.314533
4347.53	0.255168	-1.44688	1.21619	0.475692	1.50288	0.943454	1.86098	0.195941
4358.97	0.418268	-1.33796	1.31145	0.0643519	1.0837	0.824875	1.99189	0.167964
4370.42	0.459014	-1.77043	0.723812	0.641378	0.804325	1.39998	1.75479	0.412791
4381.87	0.557785	-1.56279	0.676249	0.454239	1.20023	1.49066	1.9018	0.358993
4393.31	0.475368	-0.690106	0.461122	0.28337	-0.22195	0.788258	1.54184	0.513339
4404.76	0.269147	-1.20585	0.36718	0.47689	0.115189	1.38541	1.40495	0.827151
4416.21	0.243828	-1.93416	0.761893	0.284774	1.51898	1.95498	1.63126	0.682632
4427.66	0.170174	-1.57928	0.377973	0.170929	0.985528	1.65388	1.56677	0.812899
4439.1	0.117341	-1.48981	0.419068	0.370862	0.503374	1.97025	1.91282	0.73024
4450.55	-0.0444917	-1.74157	0.363146	0.739226	0.48723	2.13308	1.55922	0.890415
4462	-0.227722	-1.80512	0.28362	0.899443	0.374351	2.12512	1.51756	1.11953
4473.44	0.0206438	-1.68067	1.06179	0.834311	0.542519	2.47323	2.24482	0.68802
4484.89	0.179094	-1.236	0.523244	0.894259	0.776361	2.17687	2.12273	0.788941
4496.34	0.00500429	-1.598	0.574622	0.988086	0.442896	1.9321	1.87066	0.74144
4507.78	0.173081	-1.82558	1.10235	0.848355	0.57236	2.17972	1.84308	0.648415
4519.23	0.359594	-1.28846	1.01792	0.907262	0.938346	1.32056	2.10915	0.648202
4530.68	0.0214337	-1.56755	1.64216	0.954628	0.166354	1.49987	2.38999	0.128959
4542.12	-0.112289	-1.57149	1.02173	0.829376	-0.193705	1.04837	2.4384	0.13757
4553.57	0.00234722	-1.11567	0.939772	0.985087	0.299739	0.574401	2.28823	0.0341272
4565.02	0.00415976	-1.24929	1.28344	0.986803	0.69868	1.81039	1.61841	-0.343674
4576.47	0.0959667	-1.31187	0.475381	0.766855	0.91222	0.609334	2.27618	-0.111797
4587.91	0.134204	-1.19144	0.99147	0.727791	0.832673	0.332857	2.66048	0.0105503
4599.36	0.180082	-0.884642	1.02534	0.670145	1.00543	0.704524	1.22171	-0.0511518
4610.8	0.240689	-0.818837	0.381118	0.614284	1.05381	0.304388	2.23159	0.184365
4622.25	0.265779	-0.936917	0.572701	0.492963	0.892445	0.44967	2.76223	0.119516
4633.7	0.219023	-0.704081	0.257099	0.122692	0.958949	-0.27701	1.85545	0.0783646
4645.14	0.217346	-0.824755	0.0499276	-0.0665328	0.887443	0.0484462	3.04783	0.218711
4656.6	0.332708	-0.656071	0.234293	-0.109694	0.859	0.0209734	1.83529	-0.0306673
4668.04	0.251972	-0.494652	0.28637	-0.197059	0.804139	-0.063493	0.893045	-0.00257715
4679.49	0.213548	-0.750952	0.25408	-0.386722	0.803964	0.649034	2.69107	0.0187051
4690.93	0.252059	-0.407993	0.0268538	-0.334938	0.903651	-0.0416538	3.17579	-0.0346662
4702.38	0.144669	-0.313566	0.0987706	0.0234972	0.868862	-0.312729	2.30066	0.0633244
4713.84	0.0208714	-0.433775	0.00763253	-0.100183	0.684468	-0.0607711	0.63234	-0.208493
4725.26	0.00441676	-0.354264	-0.287422	-0.0877941	0.664381	-0.274726	1.45499	-0.12405
4736.73	-0.0690139	-0.207532	-0.0122537	0.243241	0.836094	-0.320816	2.9805	0.0427977
4748.16	-0.0981234	0.0589497	0.0663013	0.245278	0.698172	-0.188546	2.65975	-0.0260686
4759.62	0.0069771	0.131023	0.0718826	0.303616	0.664724	0.0740955	2.82846	0.0349077
4771.07	-0.245195	0.112743	0.317456	0.394291	0.896284	-0.0116478	2.6603	-0.293995
4782.49	-0.177399	0.347214	0.572169	0.433337	1.07474	-0.0534616	2.63459	-0.508512
4793.99	0.133037	0.432041	0.874194	0.43615	0.90311	0.223537	2.60509	-0.5129
4805.37	-0.0508054	0.181178	0.837195	0.395253	0.874879	0.0788887	2.16794	-0.470868
4816.88	-0.068266	0.328352	0.800278	0.393445	1.36163	0.158162	2.17261	-0.219338
4828.29	-0.0196292	0.34746	0.85571	0.344084	1.25135	0.188913	1.98232	-0.144128
4839.72	0.272326	0.157817	0.897966	0.281998	0.982425	-0.207422	1.3863	-0.0261663
4851.25	0.32431	0.148197	0.901043	0.264756	1.13238	0.00277353	0.927661	0.0537383
4862.55	-0.0715784	0.0204737	0.712822	0.340551	1.08712	-0.0217176	0.440592	-0.0590687
4874.19	0.0504912	0.083163	0.774303	0.363758	0.814406	-0.153059	-0.208685	0.0613471
4885.43	0.0152192	0.141907	0.669038	0.33345	0.496126	0.0614408	-0.236507	0.213904
4897.04	-0.0301828	0.101212	0.224027	0.42457	0.608	-0.0212737	-0.24715	0.0446185
4908.49	0.0394288	0.168412	0.244633	0.421509	0.674655	-0.00325729	0.232274	-0.0326809
4919.75	-0.119838	0.130751	0.206031	0.356241	0.726966	0.0168118	0.946601	0.0205402
4931.79	-0.0527217	0.0805912	0.0214218	0.416332	0.915303	-0.0204549	0.626017	-0.00923515
4942.33	0.0173295	0.0448946	0.55752	0.325057	0.36393	0.0165724	0.518256	-0.000190089

## Sheet: equalsep
Time	Fly1	Fly2	Fly3	Fly4	Fly5	Fly6	Fly7	Fly8	Fly9	Fly10	Fly11
9.04816	9.05506e-07	-5.46392e-06	0.06191	-3.41933e-06	5.85121e-06	-6.14852e-07	5.38201e-06	-2.27809e-06	2.71608e-06	1.49433e-06	6.46498e-06
20.6654	-7.76245e-06	6.41763e-06	0.053566	1.029e-05	-7.90396e-06	1.23546e-06	-7.37861e-06	3.44363e-06	7.06523e-06	-3.14941e-06	-1.08968e-05
32.0169	1.4811e-05	-5.55827e-06	-0.00725039	-1.64869e-05	8.09089e-06	-1.68974e-06	7.66699e-06	-3.90965e-06	-1.85012e-05	4.41107e-06	1.34261e-05
43.516	-1.97021e-05	2.42396e-06	0.000608648	1.95926e-05	-5.56748e-06	1.7516e-06	-5.43353e-06	3.22307e-06	2.83422e-05	-4.67996e-06	-1.23856e-05
54.9464	1.98479e-05	2.85624e-06	0.00150724	-1.72443e-05	7.01836e-08	-1.23565e-06	3.93577e-07	-1.1386e-06	-3.25297e-05	3.44834e-06	6.64138e-06
66.3754	-1.3214e-05	-9.35973e-06	-0.00173129	7.97091e-06	7.74976e-06	7.81101e-08	6.88927e-06	-2.20982e-06	2.72568e-05	-5.13306e-07	3.79345e-06
77.8637	-7.47605e-07	1.53566e-05	0.00181033	7.92686e-06	-1.61684e-05	1.59033e-06	-1.48428e-05	6.19662e-06	-1.03853e-05	-3.82579e-06	-1.72838e-05
89.2613	2.02891e-05	-1.85681e-05	-0.00154285	-2.77396e-05	2.25344e-05	-3.40827e-06	2.10061e-05	-9.71469e-06	-1.71195e-05	8.66054e-06	3.04577e-05
100.751	-4.10084e-05	1.67231e-05	0.0006719	4.62759e-05	-2.37958e-05	4.81169e-06	-2.25067e-05	1.13555e-05	5.02242e-05	-1.25319e-05	-3.86426e-05
112.171	5.62571e-05	-8.343e-06	-0.00027838	-5.66135e-05	1.73834e-05	-5.14357e-06	1.68778e-05	-9.76883e-06	-7.98607e-05	1.37029e-05	3.69316e-05
123.626	-5.84928e-05	-6.41624e-06	3.97635e-05	5.17618e-05	-2.29879e-06	3.84143e-06	-3.07859e-06	4.15193e-06	9.4365e-05	-1.06408e-05	-2.17769e-05
135.079	4.15038e-05	2.51352e-05	0.000186757	-2.7042e-05	-1.98852e-05	-6.70756e-07	-1.7551e-05	5.2444e-06	-8.24111e-05	2.6311e-06	-7.21958e-06
146.511	-3.10751e-06	-4.30181e-05	-0.000353222	-1.73336e-05	4.44911e-05	-4.05697e-06	4.0757e-05	-1.67621e-05	3.70558e-05	9.63436e-06	4.58518e-05
157.976	-5.24139e-05	5.35521e-05	0.000402286	7.42897e-05	-6.40514e-05	9.3631e-06	-5.9619e-05	2.73186e-05	4.00356e-05	-2.37079e-05	-8.48341e-05
169.408	0.000113086	-5.00336e-05	-0.000337343	-0.000129457	6.97147e-05	-1.36601e-05	6.58208e-05	-3.28738e-05	-0.000135563	3.5495e-05	0.000110877
180.864	-0.000160151	2.77989e-05	0.000207272	0.000163072	-5.37185e-05	1.50447e-05	-5.19316e-05	2.94214e-05	0.000224309	-3.9977e-05	-0.000109594
192.307	0.000171698	1.33144e-05	-6.6297e-05	-0.000154537	1.25195e-05	-1.18224e-05	1.43369e-05	-1.43845e-05	-0.000272847	3.25542e-05	7.00013e-05
203.753	-0.000128895	-6.70287e-05	-4.27561e-05	8.9167e-05	5.02204e-05	3.18015e-06	4.3921e-05	-1.18985e-05	0.000247633	-1.08067e-05	1.02717e-05
215.204	2.37679e-05	0.000120096	0.000100361	3.42675e-05	-0.000121883	1.01657e-05	-0.000111406	4.50699e-05	-0.000126524	-2.3759e-05	-0.000120563
226.645	0.000133507	-0.000153954	-0.000110442	-0.000197491	0.000181497	-2.55813e-05	0.000168716	-7.65732e-05	-8.88088e-05	6.45858e-05	0.000235407
238.098	-0.000310517	0.000148902	9.15676e-05	0.00036087	-0.000203481	3.86278e-05	-0.00019183	9.48492e-05	0.000363515	-0.000100216	-0.000317126
249.541	0.000454495	-9.04281e-05	-6.59952e-05	-0.000468159	0.000164529	-4.38389e-05	0.000158464	-8.80708e-05	-0.000627736	0.000116196	0.000323724
260.989	-0.000502007	-2.36252e-05	5.0715e-05	0.000458972	-5.26003e-05	3.61616e-05	-5.64955e-05	4.8115e-05	0.000786103	-9.88143e-05	-0.000221553
272.436	0.000396384	0.000177177	-5.21108e-05	-0.000287865	-0.00012423	-1.28348e-05	-0.000107572	2.50912e-05	-0.000739962	4.01369e-05	3.69412e-07
283.882	-0.000110085	-0.000333866	6.46014e-05	-5.38212e-05	0.000332167	-2.4735e-05	0.000303046	-0.000120207	0.000419866	5.68563e-05	0.000313402
295.331	-0.000333701	0.000441129	-7.32376e-05	0.000519748	-0.000512608	6.96887e-05	-0.000475581	0.000213661	0.000178578	-0.000174779	-0.000650491
306.776	0.000847969	-0.000441463	5.9559e-05	-0.00100168	0.000591949	-0.000109655	0.000556201	-0.00027269	-0.000966281	0.000281846	0.000904672
318.224	-0.00128532	0.000289983	-9.30885e-06	0.00134075	-0.000500583	0.000128482	-0.000479147	0.000262706	0.00175207	-0.000336804	-0.000953657
329.67	0.00146334	2.50582e-05	-7.9977e-05	-0.00136045	0.000198434	-0.000110128	0.000205786	-0.000158229	-0.00226468	0.000298978	0.000694187
341.117	-0.00121232	-0.000464369	0.000193685	0.000919073	0.000298929	4.46551e-05	0.00025144	-4.47868e-05	0.00221056	-0.000142143	-8.55249e-05
352.564	0.000438053	0.000929079	-0.000299114	2.72623e-05	-0.000902108	6.4495e-05	-0.000813248	0.000318567	-0.00136453	-0.000130295	-0.000809438
364.011	0.000814405	-0.00126792	0.000350538	-0.00136618	0.00144706	-0.0001947	0.00133377	-0.000598915	-0.000318519	0.000473393	0.00180035
375.458	-0.00231554	0.00130673	-0.000300704	0.00279665	-0.00171953	0.000305018	-0.00162043	0.000790149	0.00260169	-0.000797303	-0.00258009
386.905	0.00364822	-0.000901994	0.000119673	-0.00384932	0.00150881	-0.000348603	0.00147339	-0.00078402	-0.00492046	0.000980198	0.00278452
398.352	-0.00426929	1.27885e-05	0.000185736	0.00398605	-0.000685403	0.000293044	-0.00074522	0.000494868	0.00645829	-0.000895833	-0.00210431
409.799	0.00365261	0.00124204	-0.000556773	-0.00277806	-0.000715716	-0.000135996	-0.000578954	9.21469e-05	-0.00634868	0.000445796	0.000423279
421.245	-0.00149376	-0.00257029	0.000869694	0.000111197	0.00244055	-8.4038e-05	0.00229694	-0.000881842	0.00396814	0.000336848	0.00206238
432.692	-0.00208514	0.00348604	-0.0010049	0.00359509	-0.00401942	0.000319581	-0.00395762	0.00166238	0.000491276	-0.00128974	-0.00478941
444.139	0.00631772	-0.00355959	0.000821643	-0.00736552	0.00484127	-0.000605761	0.004827	-0.00211706	-0.00613515	0.00208232	0.00696704
455.586	-0.00992072	0.00256669	-0.000418405	0.00998796	-0.00438865	0.00112654	-0.00405449	0.00201449	0.0115574	-0.00256243	-0.00780365
467.033	0.011445	-0.000880445	-0.000150562	-0.0107956	0.00241331	-0.00186145	0.0012872	-0.00133287	-0.0167668	0.00292184	0.00686195
478.48	-0.0102723	-0.00146652	0.00139958	0.00993802	0.000968307	0.0016088	0.00251847	0.000433923	0.0218524	-0.000549872	-0.00353695
489.927	0.00667853	0.0075568	-0.000928961	-0.00435918	-0.00568649	-0.000111833	-0.00480321	0.000707932	-0.0143645	0.000777104	-0.00360037
501.374	0.00303911	-0.00841287	0.00494913	-0.00464082	0.0116578	-0.00241754	0.00793136	-0.00406648	0.015194	0.0021368	0.0122538
512.821	-0.0114299	0.0142145	-0.000934405	0.0174336	-0.0143883	0.00628157	-0.00884962	0.00514708	0.0101618	-0.00102411	-0.0245345
524.267	0.0259493	-0.0111586	0.00731069	-0.0329422	0.0169017	-0.0136955	0.00403807	-0.0103635	-0.028929	0.000137097	0.0305454
535.714	-0.0360889	0.0182569	-0.0254534	0.0528623	-0.0128622	0.0239904	-0.00940872	0.0109734	0.106125	-0.117765	-0.0399473
547.161	0.0518784	-0.0837912	-0.119944	-0.164694	0.00347284	0.0757035	0.0159739	-0.0159108	-0.526427	-0.250903	0.0266962
558.608	-0.194526	-0.47115	-0.263886	-0.188373	0.0238263	-0.0555951	-0.183323	0.0362324	-1.21412	-0.331531	0.186756
570.055	-0.42025	-0.585123	-0.593718	0.135644	-0.189263	-0.0795274	-0.27964	0.288474	-1.4778	-0.289561	0.0955596
581.502	-0.296397	-0.560095	-0.875473	-0.0590935	-0.24079	0.156266	0.331971	0.314518	-1.86334	-0.139223	0.312319
592.949	-0.531986	-0.692995	-0.88802	-0.0428293	-0.227098	0.192027	0.589357	0.33602	-1.74066	-0.105068	0.675754
604.396	-0.333106	-0.865538	-0.950248	0.146938	-0.139345	0.286791	1.00036	0.467086	-1.71263	0.0664006	0.849971
615.842	-0.307906	-0.806811	-1.21642	0.205246	-0.117294	0.477935	1.27782	0.301465	-1.54255	0.180368	0.871026
627.289	-0.530871	-0.73269	-1.19149	0.286852	-0.187349	0.321242	0.620601	0.317245	-1.17615	0.363038	1.00328
638.736	-0.345079	-0.902999	-0.943846	0.266947	0.00867056	0.42383	1.12252	0.432903	-1.25678	0.675852	1.1363
650.183	-0.588001	-0.819816	-0.979974	0.323154	0.0158468	0.510533	1.5389	0.198048	-0.772337	0.561962	1.14085
661.63	-0.557166	-0.795757	-1.06105	0.310446	-0.0186601	0.448905	1.36314	0.282114	-0.659251	0.631265	1.25342
673.077	-0.320819	-0.644414	-0.968875	0.3986	0.0152284	0.739822	1.74303	0.332472	-0.723903	0.878192	1.28151
684.524	-0.441716	-0.528281	-0.856191	0.389996	-0.00561672	0.78643	1.70506	0.0383076	-0.139368	0.855913	1.34464
695.971	-0.421574	-0.858906	-1.17586	0.320136	-0.00480698	0.827059	1.73469	-0.0861485	-0.282222	1.06042	1.37415
707.418	-0.152664	-0.826782	-1.03745	0.296546	0.0252049	0.930469	1.7631	-0.146834	-0.0458106	1.42963	1.4506
718.864	-0.164024	-0.752233	-0.680706	0.170833	0.174426	0.950507	1.69932	0.00942363	0.560539	1.55233	1.42923
730.311	-0.332431	-0.783615	-0.765607	0.390139	0.095966	1.05375	1.78359	-0.040097	0.464356	1.36314	1.48397
741.758	0.00645244	-0.704129	-0.608382	0.207792	-0.0363259	0.933349	1.7797	-0.0796815	0.466179	0.917607	1.74302
753.205	0.0453337	-0.840429	-0.270039	-0.0467	0.0186648	1.15547	1.80216	0.0788122	0.557945	0.987444	1.49586
764.652	-0.0292313	-0.764455	0.292032	0.148212	-0.00499898	1.12504	1.67811	-0.0120506	0.815122	1.35281	1.50031
776.099	0.144044	-0.439126	-0.271589	0.0157526	-0.0071902	0.664909	1.63292	0.112235	0.848112	1.2701	1.70783
787.546	0.153136	-0.470277	-0.533759	0.157152	0.0163701	1.11846	1.76159	0.0837655	0.782219	1.51238	1.61275
798.993	0.306298	-0.484162	-0.162996	0.158775	-0.0214315	1.36961	1.32276	0.206662	1.23597	1.626	1.6789
810.44	0.47561	-0.407969	-0.377775	0.0785651	0.0197015	1.0315	0.975996	0.261655	1.2416	1.2805	1.72632
821.886	0.603267	-0.245181	0.144619	0.567776	-0.00989117	0.966116	1.48697	0.077457	1.30887	1.39931	1.74567
833.333	0.504359	-0.058539	-0.116646	0.47912	-0.00870575	0.727696	1.59895	0.181825	1.35158	1.68406	1.6769
844.78	0.399617	-0.345784	-0.289451	0.306078	0.039811	0.421758	1.56212	0.0261064	0.938146	1.58467	1.87279
856.227	0.547405	-0.0842396	0.149267	0.425302	-0.0921481	0.524438	1.70558	0.258258	1.28988	1.52898	2.01198
867.674	0.619795	0.197369	-0.226332	0.131834	-0.020566	0.66708	1.40501	0.367649	1.27948	1.76261	1.82612
879.121	0.749269	0.14486	-0.131299	0.0832507	-0.0732051	0.553793	1.18478	0.339218	1.18366	1.83762	1.96052
890.568	0.700202	0.290984	0.0536543	0.358038	-0.124788	0.507711	1.24868	0.554426	1.37318	1.74841	1.50295
902.015	0.60319	0.215136	-0.166732	0.314622	0.056307	0.423608	1.53016	0.0838953	1.08076	1.67771	1.10849
913.462	0.708245	0.664141	-0.482669	0.101421	-0.03553	0.0971104	1.81211	0.0535622	1.30522	1.80408	1.48565
924.908	0.655529	0.603547	-0.760326	0.0594434	-0.0194068	-0.0529954	1.86422	0.421559	1.40877	1.91049	1.63293
936.355	0.507994	0.26708	-0.523878	-0.126017	0.0267683	-0.0621899	1.87604	0.362886	1.28771	1.82863	1.39877
947.802	0.601425	0.457618	-0.183863	0.129205	-0.0197159	-0.20227	2.03511	0.611876	1.43374	1.61073	0.733486
959.249	0.574956	0.242484	-0.0489273	0.627035	0.00837649	-0.199111	2.11872	0.731565	1.34577	1.51752	0.959431
970.696	0.300014	0.362788	-0.0154766	0.442236	0.00657798	-0.244692	2.05565	0.470442	1.30411	2.13022	0.726356
982.143	0.447068	0.243592	0.0759656	0.654976	-0.0208163	-0.40287	2.16992	0.591671	1.39971	2.4864	-0.2534
993.59	0.529676	-0.0540063	0.0444907	0.867828	0.0337391	-0.399147	2.15968	0.757876	0.660989	2.2251	0.471736
1005.04	0.606497	0.0916373	0.0142328	0.73285	-0.0465098	-0.44289	2.11076	0.500026	0.0258971	1.93973	0.52679
1016.48	0.903323	-0.088174	0.0158871	0.831023	-0.226818	-0.500076	2.22445	0.453087	0.757421	1.53189	0.171226
1027.93	0.902926	0.0276763	-0.141542	0.777865	-0.0301244	-0.496941	2.20829	0.720033	0.638095	2.03641	0.283461
1039.38	0.807134	0.126756	-0.0717979	0.857511	0.0342145	-0.449313	2.29256	0.645732	-0.108682	2.30681	-0.0223154
1050.82	0.635968	-0.170316	0.203678	0.662933	-0.0328955	-0.310683	2.22102	0.741227	0.139104	1.78678	0.198859
1062.27	0.723405	-0.0552223	0.40543	0.409841	0.0295999	-0.243847	2.18387	0.930424	0.00130258	2.58714	-0.0125975
1073.72	0.963907	0.0826829	0.304467	0.660001	-0.0249836	-0.233585	2.50279	0.963179	-0.504874	2.96346	-0.0690186
1085.16	0.961934	0.0161592	0.462324	0.551635	0.0204865	-0.0664582	2.41032	1.17479	0.0519818	2.39905	0.355197
1096.61	0.806782	0.127853	0.600211	0.329323	-0.0118218	0.019914	2.17144	1.09821	0.352071	2.64372	0.40944
1108.06	0.846694	0.0863251	0.362294	0.331236	0.00256574	0.0927163	2.26619	1.01407	0.0247165	2.72565	0.448549
1119.51	0.923034	-0.145854	0.658705	0.312985	0.0121369	0.196011	2.38144	1.16873	0.600345	2.5798	0.376311
1130.95	0.827527	-0.0409681	0.703367	0.333744	-0.0336153	-0.0982349	2.32484	1.11504	0.494109	2.71661	0.446087
1142.4	0.866842	0.0976058	0.621826	0.260885	0.0683999	-0.0762879	2.19445	1.08476	-0.0944971	2.71854	0.436545
1153.85	0.736294	0.121497	0.676072	0.217612	-0.209539	0.208229	2.27608	1.41974	0.0668322	2.99032	0.384661
1165.29	0.77113	0.18559	0.722619	0.271528	-0.126793	0.058955	2.42579	1.50267	-0.0418773	2.78426	0.388568
1176.74	0.877682	0.208119	0.952086	0.331349	0.0476677	-0.0402998	2.22552	1.48683	0.0210704	2.31275	0.24716
1188.19	0.861875	0.288321	0.635929	0.269442	-0.171882	0.0874393	2.11558	1.68765	-0.00537044	2.86746	0.0722243
1199.63	0.929992	0.309921	0.633939	0.201402	0.145216	0.103493	2.22095	1.60574	-0.00357943	2.99827	0.00661257
1211.08	0.796819	0.526483	0.657678	0.231692	0.172706	-0.0148003	2.17924	1.77205	0.323816	2.5398	-0.0134689
1222.53	0.942733	0.551149	0.495402	0.328371	0.0255546	-0.0187636	2.45229	1.89121	-0.204198	2.74668	-0.30317
1233.97	1.04123	0.25079	0.759638	0.476525	0.057088	-0.0300589	2.47503	1.62095	-0.400212	2.83542	-0.342069
1245.42	0.884837	0.234262	0.755672	0.457116	-0.0604555	-0.00904644	2.12569	1.60296	0.0201307	2.61127	-0.201609
1256.87	0.965916	0.255961	0.75418	0.31973	0.0569642	-0.0243357	2.29349	1.41011	-0.00809501	2.67835	-0.172969
1268.31	1.11838	0.338867	0.620153	0.507461	0.0247613	-0.198476	2.275	1.12318	0.00129214	2.77219	-0.0568608
1279.76	1.17304	0.393314	0.484647	0.934572	-0.110017	-0.155694	2.16007	1.05251	0.00268874	2.81461	0.0861884
1291.21	0.963819	0.390201	0.653117	0.591986	-0.15739	-0.0995256	2.30954	0.844047	-0.00609346	2.70811	0.0777401
1302.66	0.673398	0.35617	0.668899	0.207408	-0.11599	-0.139797	2.05768	0.635492	0.00871639	2.6615	-0.035802
1314.1	0.551282	0.161983	0.596998	0.404454	0.237889	-0.0899083	2.06172	0.72543	-0.00909404	2.93352	0.0269183
1325.55	0.728651	0.126179	0.433638	0.323857	-0.142677	0.0259349	2.07818	0.867925	0.0119711	2.40708	-0.0200232
1337	0.873731	0.0231072	0.54646	0.305949	-0.212667	-0.0164926	1.69117	0.860286	-0.0143274	2.07226	-0.0687239
1348.44	0.924338	-0.215703	0.59747	0.38118	0.437539	-0.0525953	1.90791	0.884163	0.0167167	2.71182	0.0620205
1359.89	0.971124	-0.447633	0.329221	0.293219	-0.296699	0.0430119	2.0671	0.855394	-0.0165182	2.6174	0.0717972
1371.34	1.06348	-0.583259	0.426637	0.317693	-0.183246	-0.0156323	2.0371	0.860518	0.0147374	2.58768	0.0897179
1382.78	1.09715	-0.489621	0.354113	0.378961	0.278465	0.0787224	2.18474	0.951726	-0.00921455	2.50343	-0.0145599
1394.23	1.12561	-0.508182	0.353945	0.271239	-0.190294	0.0877469	2.06928	0.917052	-0.00268273	2.33603	-0.12394
1405.68	1.13345	-0.516623	0.518895	0.30263	0.0426014	-0.0546699	2.2428	0.947219	0.0307501	2.66415	-0.0121744
1417.12	0.767857	-0.302061	0.519157	0.44469	-0.0959947	0.0351747	2.28034	0.872685	-0.231814	2.37482	0.0093991
1428.57	0.76365	-0.2208	0.645159	0.371351	-0.0846213	0.0273115	2.09206	0.80991	-0.0803664	2.58882	-0.00864123
1440.02	0.798752	-0.256961	0.258474	0.421383	0.321605	0.0145685	2.19305	0.994493	0.035368	2.76805	0.00728171
1451.47	0.728453	-0.139617	0.337584	0.574797	0.0129777	0.0538663	2.00608	0.829012	-0.0293155	2.56895	-0.00606853
1462.91	0.905238	-0.068146	0.612286	0.605025	-0.101743	0.0223188	1.83825	0.681647	0.0455982	2.61798	0.00393665
1474.36	0.955816	-0.0215716	0.359219	0.602362	0.305406	-0.0183446	1.65418	0.779205	-0.166834	2.12554	-0.000730709
1485.81	0.992081	0.030537	0.501818	0.632012	-0.279452	-0.0395472	1.30655	0.935489	-0.174276	2.18977	-0.00257115
1497.25	0.873311	-0.0558514	0.388581	0.560145	-0.332195	-0.0454243	1.34609	0.924868	-0.220845	1.85376	0.00386016
1508.7	0.882171	0.0209241	0.357981	0.478994	0.441092	-0.122452	1.36272	0.830792	-0.0118666	1.3765	-0.0075405
1520.15	0.823919	0.112376	0.403328	0.708881	-0.206317	-0.0844618	1.21956	1.11814	0.230028	2.0636	0.00703091
1531.59	0.673789	-0.00540193	-0.0635008	0.763019	-0.0210559	-0.128089	1.19392	0.177767	0.139735	2.07799	-0.0103997
1543.04	0.734803	0.011712	0.00972625	0.504208	0.210591	-0.10302	1.16132	-0.523032	0.52317	1.93109	0.0179436
1554.49	0.477581	-0.119127	0.352381	0.679528	-0.385549	-0.0891934	1.22064	0.75773	0.473059	1.99488	0.147932
1565.93	0.518074	-0.237115	0.368234	0.796185	0.204828	-0.180867	1.22023	1.19281	0.49367	1.90623	0.214843
1577.38	0.757987	-0.0576223	0.287421	0.71666	0.239224	0.0751272	1.21035	1.1286	0.737753	2.18437	0.317723
1588.83	0.717061	-0.0424621	0.0935956	0.977327	-0.206804	-0.189022	1.29449	1.38322	0.453877	2.1486	0.33918
1600.27	0.851572	0.127063	0.265043	1.00798	-0.0998356	-0.0746041	1.24503	1.29055	0.567376	2.13828	0.24016
1611.72	0.821601	0.247219	0.382595	1.1435	0.108995	0.177759	1.38198	1.48551	0.644959	2.36869	0.239929
1623.17	0.779787	0.325207	0.180279	1.18131	0.175072	-0.329597	1.69453	1.55	0.611706	2.35626	0.286348
1634.62	0.823561	0.713275	0.248766	0.977691	0.00516432	0.112055	1.91038	1.56917	0.5068	2.43031	0.430807
1646.06	0.832782	0.726969	0.150106	1.26437	0.0285188	0.0974595	1.95841	1.72226	0.20078	2.11736	0.428237
1657.51	0.993215	0.747372	0.153813	1.59491	-0.0400414	-0.0964817	2.12188	1.62107	0.286996	1.81325	0.552896
1668.96	0.947461	0.874318	0.295343	1.74703	-0.0410856	0.17594	2.16214	1.5963	0.27169	2.1723	0.743014
1680.4	0.919327	0.722616	0.109001	1.44878	0.0626841	-0.0643767	1.44426	1.67568	-0.0531656	2.22348	0.672968
1691.85	0.935487	0.827537	0.112725	1.42533	-0.052266	0.275542	1.30707	1.8179	-0.147201	2.1941	0.993328
1703.3	0.758071	1.10279	0.129259	1.72992	0.0500624	0.067965	1.66945	1.94701	0.259909	2.27197	1.04346
1714.74	1.01508	1.35549	0.108471	1.42374	-0.0187109	0.133835	1.40291	1.73982	0.209843	2.1915	0.858474
1726.19	1.17302	1.5251	0.135875	1.59533	0.0669383	0.456377	1.88456	1.59198	-0.123431	2.2682	0.959788
1737.64	0.857535	1.41003	0.0294955	1.52305	-0.0489061	-0.109585	2.01838	1.86114	0.364651	2.22136	0.874524
1749.08	0.845666	1.3419	-0.164837	0.987972	-0.353663	0.378661	0.729538	1.45216	0.646581	2.17115	0.922712
1760.53	0.79184	1.07836	-0.168449	1.39041	-0.183235	0.62943	1.13526	0.865807	0.769976	2.01657	1.12187
1771.98	0.828391	0.944257	0.188098	1.64747	-0.30776	0.257282	2.24275	1.00279	1.08241	1.89572	0.971456
1783.42	0.893347	0.971796	0.0628244	1.76753	-0.36055	0.121995	2.0419	0.641809	1.08124	2.02218	0.743773
1794.87	0.630905	0.472399	-0.242158	1.95137	-0.703664	0.0473735	2.16831	0.749641	1.11463	1.89	0.784356
1806.32	0.753528	0.719835	-0.288315	1.51009	-1.06295	0.297973	2.27181	1.4977	1.15287	2.02617	0.717246
1817.77	0.743124	1.02684	-0.370512	1.03113	-1.07263	0.313095	2.25073	1.11221	1.35319	2.14198	0.861207
1829.21	0.590462	0.750392	-0.281924	1.27537	-1.40436	0.475092	2.59194	0.605377	1.45539	2.10694	0.996538
1840.66	0.592589	0.916109	-0.297722	1.76934	-1.50244	0.604518	2.47908	0.865097	1.13969	2.19381	0.919519
1852.11	0.558872	0.780091	-0.154729	1.63241	-1.64416	0.534857	2.33857	0.738508	1.05802	2.29346	1.01183
1863.55	0.710147	0.642504	-0.00488984	1.66325	-1.72791	0.469244	2.68931	0.746448	0.742757	2.52298	0.814003
1875	0.562197	0.547168	-0.218479	1.94622	-1.59161	0.574454	2.68148	0.986459	-0.244761	2.3155	0.965203
1886.45	0.491573	0.125601	0.0232229	1.77164	-1.53786	0.818325	2.70295	0.58092	-0.824305	2.4497	1.30905
1897.89	0.413609	0.192293	0.407197	1.64312	-1.23612	0.374543	2.66871	0.613598	-0.503354	2.55235	1.2704
1909.34	0.131975	0.176877	0.3501	1.55462	-1.2879	0.449936	2.35302	0.902963	-0.250894	2.38853	1.29093
1920.79	0.171627	0.188657	0.271583	1.29846	-1.44053	0.927104	2.56633	0.703619	-0.647467	2.62985	1.32599
1932.23	0.107835	0.222653	0.248856	1.20533	-1.35383	0.726299	2.52363	0.48875	-0.616517	2.43861	1.42279
1943.68	-0.00115425	-0.0915941	0.303035	1.2182	-1.5211	0.75301	2.61197	0.334248	-0.418733	2.65335	1.41924
1955.13	-0.264008	0.18013	0.317099	0.957931	-1.44312	0.76417	2.5828	0.619345	-0.770136	2.16195	1.61769
1966.58	-0.445126	0.4451	0.149316	0.719982	-1.41676	0.421574	1.96144	0.752681	-0.639993	1.54712	1.89689
1978.02	-0.343125	0.1131	0.122665	0.731123	-1.57274	0.316795	2.22842	0.753181	-0.58123	2.74553	1.79281
1989.47	-0.412862	0.150425	0.253757	0.55706	-1.5509	0.552339	2.34018	0.868539	-0.89921	2.4802	1.53624
2000.92	-0.228533	0.503805	0.336777	0.738823	-1.42639	0.447783	2.10589	0.30583	-0.848692	1.74804	1.50435
2012.36	-0.0681832	0.27525	0.275145	0.827508	-1.15706	0.247237	2.17732	0.490263	-0.995021	2.41794	1.76052
2023.81	-0.0584505	0.0825047	0.0479032	0.618869	-1.07935	0.656749	1.879	0.800946	-1.07608	2.67253	1.7479
2035.26	0.0511232	0.0896973	0.0470329	1.03762	-0.904404	0.776485	1.75884	0.781952	-1.10107	2.75472	1.62555
2046.7	0.187209	0.0624314	0.225481	1.12893	-0.676504	0.728581	1.8438	1.19751	-1.1737	2.75341	1.6334
2058.15	0.30548	0.195593	0.400543	1.07583	-0.686049	0.843292	1.82297	0.552909	-0.820705	2.61073	1.63921
2069.6	0.199169	0.0529138	0.497605	1.32269	-0.754093	0.737835	1.90474	0.502582	-0.739484	2.55812	1.57327
2081.04	0.258618	-0.0603515	0.379106	1.36202	-0.716849	0.879621	1.99958	1.33759	-0.948219	2.94328	1.73475
2092.49	0.316289	-0.00985052	0.369114	1.4111	-0.388192	1.0533	1.93296	1.14664	-0.897382	2.99553	1.8866
2103.94	0.377792	-0.00255087	0.264376	1.29879	-0.0237951	1.16662	1.91347	1.22279	-0.570005	2.55686	1.61367
2115.38	0.39128	-0.138628	0.415551	1.56084	0.21595	1.24594	2.0893	1.39577	-0.351354	3.08008	1.61397
2126.83	0.269483	-0.0443978	0.479489	1.9512	0.107305	1.02206	2.50777	1.17573	-0.362495	2.93929	1.5797
2138.28	0.403303	0.193126	0.248593	1.74479	0.616707	1.03666	2.38275	1.16972	-0.309154	2.34353	1.52981
2149.73	0.282076	-0.150434	0.404546	1.83168	1.35011	1.2304	1.94365	1.16289	-0.101058	2.879	1.70688
2161.17	0.0149737	-0.284701	0.318418	2.1705	1.18494	0.771014	2.59002	1.19292	0.190103	2.9901	1.65905
2172.62	0.0605236	-0.166057	0.38808	2.31261	1.19305	0.511977	2.45599	1.23074	0.178575	2.62563	1.59003
2184.07	0.142581	-0.0522376	0.544445	2.36624	1.23422	1.09061	2.15365	1.32716	-0.0962283	2.63644	1.44115
2195.51	0.244892	-0.00111638	0.531377	2.13798	1.80118	1.24671	2.7776	1.41131	0.0736765	2.95079	1.71344
2206.96	0.398804	-0.267123	0.420547	1.93037	2.33871	1.11245	1.65544	1.27037	-0.0432441	3.06496	1.83696
2218.41	0.375907	-0.0375452	0.0961304	1.89002	1.78577	1.09475	1.13794	1.22679	-0.616088	3.11814	1.54087
2229.85	0.402051	-0.00953265	0.429861	1.66707	1.95345	1.05697	2.3503	1.31505	-0.470418	3.42633	1.5942
2241.3	0.274578	-0.20787	0.516114	1.62508	2.38016	1.12247	1.95473	1.37646	-0.563369	3.22867	1.08209
2252.75	0.0978376	0.0998794	0.227453	1.75032	1.96192	0.74087	1.49365	1.40346	-0.581178	3.04094	1.05287
2264.19	0.365181	-0.170918	0.247323	1.68149	1.87833	0.573756	2.16689	1.26711	-0.0708038	3.29353	1.61555
2275.64	0.276763	-0.157689	0.0855892	1.60662	2.03268	1.02672	2.19407	1.3265	-0.223391	3.08773	1.51728
2287.09	-0.0535353	0.108528	0.118581	1.63265	1.89015	0.969353	2.12995	1.31224	-0.258875	2.91763	1.56911
2298.53	-0.0783039	-0.134152	-0.085875	1.56669	1.96363	0.891123	2.21729	1.25929	0.0274418	2.87787	1.50653
2309.98	-0.0213891	0.135452	-0.326859	1.17418	2.24697	1.27642	2.06456	1.42205	0.0643827	2.68944	1.75103
2321.43	0.0168344	-0.0715128	-0.12443	0.848776	2.33563	1.19106	1.89616	1.28881	0.215904	2.43524	1.63488
2332.88	0.0579821	-0.455131	-0.357292	0.725189	2.35668	1.1207	1.54882	1.2701	0.383214	1.99926	1.39836
2344.32	0.080743	-0.105974	-0.366185	1.02464	2.27738	1.41007	1.56531	1.20411	0.28441	2.53949	2.07725
2355.77	0.122935	-0.0809041	-0.0852215	1.09646	2.03916	1.336	1.74721	1.24673	0.223819	3.09762	1.91765
2367.22	0.214316	-0.421243	-0.169667	0.649004	1.81004	1.24136	1.4444	1.57665	0.363974	2.84226	1.93896
2378.66	0.0765395	-0.550113	-0.039427	0.855472	1.77215	1.26043	1.25496	1.43746	0.741023	3.00219	2.05797
2390.11	0.146065	-0.344169	-0.0684562	0.978962	1.66169	1.48119	1.26746	1.23691	0.908534	3.10308	1.79947
2401.56	0.303855	-0.112706	-0.212938	0.892405	0.648141	1.76041	1.17337	1.33825	0.56451	3.00425	2.1367
2413	0.281881	0.10403	-0.0828298	0.977462	0.524967	1.46952	1.27965	1.42063	0.434491	3.33733	2.08342
2424.45	0.308709	0.0335898	-0.131835	1.02274	1.479	1.24532	1.60669	1.56387	0.559335	3.71537	2.36898
2435.9	0.0794287	0.0494102	-0.0872735	1.3536	1.42335	1.20353	1.63027	1.77131	0.486762	3.76596	2.64056
2447.34	0.0664287	0.435821	-0.105678	1.39173	1.53551	1.31734	1.36156	1.7965	0.288131	3.6076	1.65688
2458.79	0.0768188	0.0732232	-0.300215	1.60318	1.60101	1.42074	1.52005	1.9355	0.259109	3.48914	1.45687
2470.24	-0.170051	-0.180324	-0.263486	1.67019	1.38365	1.26448	1.75324	2.09995	0.169801	3.64012	1.93013
2481.68	-0.293986	0.080528	-0.232846	1.18427	1.5287	1.47152	1.67204	2.11144	0.041888	3.89659	1.97121
2493.13	-0.521428	-0.0700909	-0.10065	1.93168	1.71681	1.45304	1.89153	2.11707	-0.110879	3.99508	1.74604
2504.58	-0.549789	0.0675585	0.186779	2.04136	1.76985	1.37605	2.04082	2.10644	-0.546319	4.20106	1.44758
2516.03	-0.43954	0.446887	0.397164	1.54528	1.50342	1.42973	2.06641	2.33389	-0.703372	4.49613	1.89279
2527.47	-0.417251	0.273102	0.448584	2.50961	1.8418	1.18216	2.15103	2.15407	-0.703173	4.20664	2.15614
2538.92	-0.337313	0.0148852	0.267486	2.72414	1.67253	1.16049	1.96773	2.08804	-0.812508	3.94294	2.20572
2550.37	-0.239605	0.0884798	0.15083	2.5675	1.63016	1.05074	2.23464	2.38267	-0.705452	4.23834	2.02128
2561.81	-0.092773	-0.0181573	0.353858	2.82124	2.45964	1.05082	2.53039	2.03424	-0.469159	4.26834	1.73881
2573.26	-0.0480316	-0.0100566	0.241731	2.31168	2.48419	1.13069	2.33559	1.94798	-0.580723	4.17811	1.98178
2584.71	0.00224886	-0.0736184	-0.00163341	1.9795	2.1902	0.900714	2.49324	1.92248	-1.12801	4.3777	1.89848
2596.15	0.0728592	-0.280195	0.106314	2.34892	1.71876	0.998282	2.39518	1.56066	-1.76883	4.37583	1.72521
2607.6	0.214822	-0.0726586	-0.107342	2.17952	1.59294	0.987774	1.98262	1.39394	-2.09042	4.19384	1.51085
2619.05	0.25128	-0.299035	-0.132501	1.46345	1.84653	1.03604	2.0151	1.22699	-1.71406	4.23769	1.62398
2630.49	0.239877	-0.423314	-0.130521	1.12425	1.89942	1.26875	2.01064	0.886465	-1.37496	3.9933	1.83719
2641.94	0.513053	-0.48959	-0.279087	0.788885	1.25563	1.10236	1.81072	0.511838	-1.35854	3.39725	1.48409
2653.39	0.358308	-0.712222	-0.119846	0.351493	0.754512	0.987747	1.65052	0.709474	-1.2167	3.40765	1.42467
2664.84	0.245413	-0.460341	-0.28333	0.195745	1.59435	0.893813	1.69393	1.03891	-1.18523	4.15206	1.39616
2676.28	0.586772	-0.647193	-0.255079	0.204904	1.99234	0.971109	1.69807	1.07935	-1.32061	4.28526	1.24262
2687.73	0.566336	-0.486589	-0.053453	0.19228	1.83914	0.997551	1.43095	0.946713	-1.5089	3.99419	1.26177
2699.18	0.532384	-0.13073	0.0940783	-0.0105668	1.58059	0.843192	1.43412	0.938397	-1.52338	4.27378	1.382
2710.62	0.620234	-0.360791	0.418759	-0.0415684	1.49978	1.017	1.59985	1.31221	-1.69337	4.1743	1.65345
2722.07	0.670839	-0.122877	0.348928	-0.0172412	1.44243	1.0393	1.73751	1.15619	-1.84165	3.99809	1.55892
2733.52	0.833996	0.0926466	0.0391223	0.00498941	1.33388	0.988163	1.60487	1.0555	-1.84699	3.45659	1.5314
2744.96	0.803151	0.0789235	-0.169572	0.165437	2.37351	1.05218	1.52401	1.31132	-2.00475	2.89423	1.73353
2756.41	0.866497	0.109163	-0.0503253	0.200293	2.36094	0.931399	1.91018	1.06169	-1.88315	3.15984	1.48884
2767.86	1.19354	-0.189927	0.200709	0.405895	1.81152	0.932582	1.71395	0.997826	-1.96301	3.34378	1.59885
2779.3	1.24586	-0.418259	0.250963	0.620063	2.16695	1.05519	1.78369	1.16227	-2.12138	3.37828	1.67427
2790.75	0.905922	-0.661024	0.12368	0.841405	1.9399	0.97621	2.24326	1.23211	-2.28409	2.85459	1.42478
2802.2	0.792079	-0.720303	-0.0305752	0.981694	2.37179	0.937719	1.73358	1.43713	-2.51434	2.4985	1.56779
2813.64	1.16081	-0.486191	0.208147	1.09516	2.67799	0.863037	1.41644	1.48545	-2.35227	2.59404	1.42558
2825.09	1.21558	-0.513258	0.184796	1.24717	2.63764	0.708504	1.44057	1.5942	-2.40861	2.75857	1.36137
2836.54	1.08965	-0.268448	-0.0806684	1.07084	2.74625	0.923075	1.53933	1.75185	-2.28315	2.95715	1.57058
2847.99	1.17857	-0.299821	-0.0616282	1.16985	2.19577	0.982339	1.73094	1.74046	-2.3514	2.99965	1.70282
2859.43	1.01304	-0.586341	-0.156319	1.11374	2.2681	0.930975	1.43587	1.83456	-2.64477	3.1799	1.81027
2870.88	1.04811	-0.42229	-0.146918	1.0639	2.74243	1.08402	1.64293	1.866	-2.47275	3.017	1.74471
2882.33	1.2666	-0.362301	-0.0630323	1.47798	2.95056	0.924115	1.48018	2.11518	-2.53243	2.92588	2.14205
2893.77	0.866282	-0.206246	-0.0688245	1.4322	2.16393	0.971561	0.913833	2.0496	-2.33848	2.90893	1.95256
2905.22	0.734384	-0.210556	0.000612253	1.30443	2.20948	1.26004	1.3611	2.21999	-2.2021	3.03411	1.56497
2916.67	1.12156	-0.276329	0.132625	1.28778	3.28671	1.34712	1.04977	3.17698	-2.29841	3.43382	1.99437
2928.11	1.0839	0.191991	-0.0676165	1.18844	2.31089	1.4606	0.680997	2.78097	-2.25598	3.47718	2.04374
2939.56	0.928157	0.28598	-0.0610001	1.17287	2.21379	1.45953	1.18949	2.42361	-2.46835	3.30699	2.28052
2951.01	0.921887	0.0540975	0.200485	1.13666	2.94511	1.32177	1.06853	3.04593	-2.56054	3.35575	1.93915
2962.45	0.867727	0.110361	-0.0632729	1.12424	2.60323	1.21714	0.957744	3.18674	-2.50249	3.68482	1.47909
2973.9	0.87664	0.0282532	0.199178	1.09843	2.9907	1.23525	0.988411	3.34463	-2.15501	3.60094	1.97556
2985.35	0.9067	-0.0154483	0.152989	1.16471	3.18523	1.29293	1.15994	3.14168	-1.90382	3.69717	1.85999
2996.79	0.90552	0.361407	-0.156526	0.934623	3.08514	1.34531	1.8619	3.21969	-2.101	3.58425	1.63111
3008.24	0.930357	0.528006	0.324258	0.578316	3.45804	1.39574	1.61666	3.44488	-1.55657	3.21199	1.43599
3019.69	1.00156	0.220052	-0.122413	0.753815	3.49086	1.26833	0.658209	3.19934	-0.867067	3.44996	1.29396
3031.14	1.14431	0.123807	-0.183775	0.687692	2.86874	1.23876	0.688008	3.59659	-0.997126	2.87626	1.51189
3042.58	1.04221	0.233	0.350314	0.417306	2.66456	1.18265	1.42729	3.4839	-0.941916	3.04683	1.29314
3054.03	1.05267	0.399554	-0.0632299	0.368608	2.95121	0.932052	1.92317	2.99879	-1.05684	3.72606	1.39484
3065.48	1.10077	0.63938	-0.0225346	0.252248	2.78294	0.861716	2.0398	3.2935	-0.982104	3.33739	0.995842
3076.92	0.672222	0.468421	0.276504	0.261559	2.71846	0.690984	1.95619	3.6193	-0.452549	3.5637	0.213928
3088.37	0.819691	0.41462	0.237218	0.208345	2.47333	0.530416	1.83955	3.62002	-0.661093	3.20296	0.620615
3099.82	1.16671	0.518189	-0.0186757	0.190859	2.01497	0.550239	1.97103	3.07747	-0.608838	2.59381	0.913378
3111.26	1.05133	0.485957	-0.15773	0.294847	2.03701	0.476524	2.14378	2.63739	-0.592915	2.75009	0.0747244
3122.71	0.962213	0.874807	-0.0452314	0.327521	1.76968	0.461144	1.69789	2.65614	-0.863489	2.61226	-1.12571
3134.16	0.884654	0.847984	-0.0577097	0.360689	1.69626	0.445396	1.45943	2.84625	-0.490151	2.35424	0.0926771
3145.6	0.940366	0.824739	0.054933	0.16343	2.08648	0.373629	1.79904	2.93803	-0.419181	2.56055	1.25837
3157.05	0.843674	1.20432	-0.0240429	0.275833	2.13409	0.448265	1.83405	2.77482	-0.656669	3.27959	0.651189
3168.5	0.851208	1.12784	0.30701	0.557422	2.22905	0.549076	1.84138	2.73387	-0.930279	3.64486	1.07673
3179.94	0.931517	1.04879	0.655941	0.468741	2.57773	0.616312	1.58657	2.58894	-1.05673	3.67413	1.09856
3191.39	0.849899	0.963018	0.56448	0.521991	2.46308	0.568957	1.36571	2.4989	-0.439002	3.2557	1.21238
3202.84	1.15162	0.729211	0.82493	0.480841	2.35301	0.506471	1.1977	2.34302	-0.121527	3.19156	1.19554
3214.29	1.13311	0.638866	0.711036	0.752307	2.73278	0.410941	1.39161	2.06564	-0.330372	3.39461	0.967102
3225.73	0.977318	0.785763	0.808678	1.19413	2.50387	0.266396	1.28558	2.16838	-0.053381	3.15605	1.4788
3237.18	1.42153	0.66828	1.17996	0.857971	2.67435	0.339044	0.0878544	2.2326	0.000257793	3.24528	1.08498
3248.63	1.49235	0.554662	1.05234	0.675499	2.90091	0.235765	0.101578	1.81406	-0.204086	3.01781	1.22298
3260.07	1.32635	0.797297	0.954654	0.682092	1.9785	0.158077	0.131623	1.56725	-0.131651	3.11685	1.58635
3271.52	1.42381	0.546938	1.10167	0.616093	1.78408	0.220545	0.550734	1.78986	-0.258128	2.69587	1.34311
3282.97	1.09391	0.508968	1.10955	0.823148	2.08747	0.209377	0.873624	1.8945	-0.0967842	1.8254	1.21334
3294.41	0.763604	0.766099	0.763212	0.757402	2.21162	0.339047	0.336026	1.80701	0.0389964	2.36826	1.13736
3305.86	0.792144	0.650333	1.32902	0.493681	2.233	0.168323	1.47607	1.70468	-0.0658173	2.607	1.67793
3317.31	0.700586	0.627488	1.80391	0.419442	2.10103	0.160827	1.44766	1.47429	0.203856	2.29033	1.81916
3328.75	0.695564	0.489367	1.54801	0.184771	2.19974	0.361778	1.19608	1.16977	0.10516	1.95105	1.72841
3340.2	0.694214	0.54995	1.75484	0.0253396	1.61714	0.342444	1.92591	1.35752	0.036899	2.187	1.74914
3351.65	0.519956	0.589213	1.69251	0.153954	1.45359	0.531813	1.57201	1.40975	0.172981	2.73464	1.67936
3363.1	0.708904	0.448434	1.76402	0.26895	2.52021	0.598634	1.90712	1.68299	0.213094	2.80508	1.87862
3374.54	0.951793	0.644907	1.56091	0.392927	2.66988	0.801442	1.93776	1.96485	0.30788	2.07023	1.75244
3385.99	0.757524	0.369662	0.991472	0.360966	2.26988	0.956689	1.00313	1.24796	0.251411	1.58658	1.68255
3397.44	0.846028	0.0789404	1.39502	0.383706	2.18838	0.897832	1.21602	1.74614	0.424795	2.5931	1.44855
3408.88	0.993524	0.132265	1.72839	0.607787	2.27742	1.13865	1.85867	2.2382	0.613688	2.1616	0.695559
3420.33	0.807534	-0.00475733	1.61481	0.815978	2.15303	1.22176	2.12122	2.12561	0.872509	1.94782	0.806017
3431.78	0.629951	0.143869	1.22639	0.912782	1.55144	1.31854	2.27091	2.42934	0.726323	2.58597	1.39175
3443.22	0.918943	0.434201	0.98011	0.94145	1.59953	1.34206	2.46055	1.61417	0.519518	1.76149	1.3837
3454.67	1.45198	0.390341	1.32696	1.01501	1.61033	1.27023	2.56031	1.76462	0.958009	1.79487	1.28641
3466.12	1.40928	0.273332	1.29777	0.972713	1.15329	1.3155	2.32589	2.51404	0.896579	2.33194	1.40787
3477.56	1.39103	0.380985	1.08653	0.943863	1.07261	1.00217	2.38969	2.36514	1.0839	2.63921	1.36964
3489.01	1.41793	0.267199	1.15899	0.931071	0.519085	0.594997	2.57372	2.39661	1.4603	2.7261	1.03199
3500.46	1.31025	0.194424	1.07507	0.987011	0.0911756	0.483326	2.69491	2.27663	1.3002	2.46962	0.874018
3511.9	1.31564	0.155367	1.00394	0.842384	0.091218	0.736344	2.77428	2.15718	1.52725	2.37383	0.98184
3523.35	1.13235	-0.247192	1.04498	0.478382	-0.267749	0.662473	2.82359	2.22494	1.39769	2.23395	1.04542
3534.8	1.10359	-0.183478	0.862195	0.734002	0.113167	0.465674	3.08296	2.22556	0.910292	2.49581	1.11593
3546.25	1.1498	-0.186103	0.800208	0.756875	0.511818	0.776977	3.0037	2.09345	0.887268	2.60392	1.50824
3557.69	0.926429	-0.464989	0.85717	0.50434	0.293882	0.927283	2.73522	2.06348	0.824699	2.4846	1.71682
3569.14	0.809907	-0.353602	0.774346	0.659879	0.440943	0.858302	2.46553	1.72543	0.913588	2.50676	1.57374
3580.59	0.813608	-0.247473	0.445455	0.686279	0.477578	0.522222	2.54414	1.66441	0.512968	2.14779	1.84066
3592.03	0.844697	-0.246026	0.0703325	0.846997	0.125122	0.443515	2.38137	1.57998	-0.375929	1.24071	1.90291
3603.48	0.976831	-0.553293	0.187498	0.866192	0.0197401	0.407528	1.58994	1.09181	-0.0878925	0.968542	1.7807
3614.93	0.843808	-0.431203	0.319744	0.596846	0.451292	-0.175565	2.21893	1.35391	-0.228605	1.30501	1.81301
3626.37	0.615389	-0.267973	0.162425	0.346313	0.579051	-0.659022	2.31782	1.26375	-0.602549	1.0411	0.925634
3637.82	0.596435	-0.667514	0.00389476	0.115935	0.586732	-0.917318	1.64837	1.04058	-0.528142	1.40631	0.515088
3649.27	0.431068	-0.530351	-0.0554048	-0.125178	0.943197	-0.630069	2.68586	0.824533	-1.26437	1.84247	1.28268
3660.71	0.136381	-0.528754	-0.101513	-0.652436	0.83759	-0.376344	2.82627	0.351507	-1.29735	1.38356	1.18376
3672.16	0.0307328	-0.239494	-0.136471	-0.732287	0.554839	-0.397872	2.31631	0.458696	-1.02543	1.24606	0.981073
3683.61	-0.0592618	0.121855	0.182996	-0.83904	0.651145	-0.229185	2.2279	0.405114	-0.828437	1.25382	1.15393
3695.05	-0.204861	0.00699182	0.313648	-1.03023	1.03804	-0.23503	1.89911	0.226056	-0.297792	1.20496	0.767465
3706.5	-0.242812	0.16405	0.266283	-0.491492	1.05696	-0.130149	1.84671	0.325321	-0.251873	1.26235	0.860757
3717.95	-0.260951	-0.0807567	0.49212	-0.440808	0.880249	0.170998	1.42267	0.468395	-0.273895	1.03926	0.998985
3729.4	-0.355853	-0.0846414	0.316123	-0.493799	0.81242	0.170148	1.13776	0.133117	0.152639	0.877088	0.654056
3740.84	-0.148449	-0.0726601	0.388819	-0.177011	0.451703	-0.0638146	1.23586	-0.202345	0.756247	0.868598	0.693006
3752.29	0.091476	-0.24205	0.480653	-0.119581	0.604911	-0.0497781	0.916479	-0.222023	0.89025	0.608369	0.610457
3763.74	0.0656778	-0.0246467	0.216808	0.197751	1.05019	-0.0297218	0.667043	-0.338413	0.786996	0.492024	0.476284
3775.18	0.147412	0.00298422	0.343199	0.514276	1.048	0.00804394	0.53814	-0.199843	0.565192	0.453677	0.292205
3786.63	0.121048	0.0171035	0.354514	0.658955	1.09982	0.0185435	0.484855	-0.333852	0.410507	0.314098	0.0441472
3798.08	0.245842	-0.0327542	0.352946	0.834306	1.24135	-0.0608398	0.603999	-0.195581	0.417195	0.108865	0.19265
3809.52	0.248114	-0.160455	0.232027	0.700496	1.28289	0.183011	0.388475	0.0471868	0.136068	-0.164266	-0.0391607
3820.97	-0.0699359	-0.374416	0.369855	0.476029	0.873316	0.251502	0.581193	-0.217861	-0.111855	0.0494925	-0.318377
3832.42	-0.0435994	-0.425088	0.4908	0.523238	0.896318	0.172136	0.67118	-0.235321	-0.239166	0.321708	-0.371784
3843.86	-0.0445272	-0.496099	0.312392	0.687777	0.890695	0.21092	0.0542184	-0.343101	0.0234812	0.384688	-0.621039
3855.31	-0.0765	-0.501963	0.683816	0.69051	0.69553	0.325003	0.305494	-0.134403	-0.066165	0.333084	-0.530379
3866.76	0.022937	-0.295196	0.774059	0.651806	1.15104	0.565559	0.766042	0.119374	-0.255667	0.125798	-0.14507
3878.21	0.0378353	-0.383918	0.715833	0.64587	0.745365	0.61987	0.723794	-0.0774181	0.0803054	0.262186	0.000954581
3889.65	0.0576679	-0.260228	0.529077	0.792929	0.597168	0.587552	0.735392	-0.113949	-0.19939	0.412973	-0.0733081
3901.1	-0.0114567	-0.323179	0.56047	0.814927	0.987718	0.536358	0.741407	-0.338932	-0.116308	0.586172	0.0287631
3912.55	-0.0170052	-0.456969	1.12448	0.610697	1.12817	0.467282	0.829289	-0.371537	-0.0276372	0.567208	0.253802
3923.99	0.125684	-0.244713	0.917522	0.810058	1.44376	0.430365	0.812527	-0.232292	-0.223531	0.207452	0.335287
3935.44	0.113236	-0.1892	0.895418	0.839439	1.27843	0.386173	0.612572	-0.317573	-0.0319464	0.456305	0.165742
3946.89	0.124077	-0.200249	1.00411	0.505895	1.234	0.546296	0.286557	-0.206241	-0.328998	0.973962	0.457058
3958.33	0.0920935	-0.174062	0.847671	0.291727	1.43638	0.529843	0.20924	-0.0318285	-0.294755	0.987136	0.534637
3969.78	-0.0794105	-0.0298655	1.24595	0.377994	1.31129	0.367816	0.348993	-0.0330726	-0.151344	1.02248	-0.202957
3981.23	-0.215479	-0.197753	0.875631	0.351236	1.35089	0.572418	0.202432	0.188844	-0.366071	0.841304	0.366238
3992.67	-0.338216	-0.407213	0.454657	0.0100891	1.38498	0.506946	0.116252	0.657154	-0.399885	0.552368	0.830441
4004.12	-0.245877	-0.0951515	0.825198	-0.133694	1.23096	0.281504	0.499283	0.478988	-0.467324	1.24852	0.606064
4015.57	-0.256082	-0.210012	0.726146	-0.117281	1.21564	0.286394	0.709507	0.379692	-0.645189	1.63312	1.12943
4027.01	-0.263597	-0.559941	0.601238	0.0151913	1.22942	0.111993	0.661594	0.783617	-0.583908	1.73303	0.737647
4038.46	-0.242814	-0.425693	0.607834	-0.0724202	1.30466	-0.10389	0.816862	0.641107	-0.310103	1.60486	0.465377
4049.91	-0.342628	-0.482226	0.591434	0.157667	1.14149	-0.153754	0.836408	0.578032	-0.539273	1.44331	0.744546
4061.36	-0.242781	-0.561393	0.511066	0.381901	1.21395	-0.158122	1.0078	0.678979	-0.473335	2.34918	0.601453
4072.8	-0.254072	-0.514964	0.35572	0.0299723	1.57406	-0.259871	0.844799	0.662577	-0.302761	1.61583	0.873454
4084.25	-0.149484	-0.648922	0.408893	0.22042	1.34397	-0.204642	0.619952	1.03282	-0.5072	0.699927	1.07516
4095.7	-0.140396	-0.734159	-0.00924225	0.370495	1.32687	-0.112899	1.0393	0.504385	-0.3494	1.75004	1.02791
4107.14	-0.173873	-0.866617	-0.126415	0.273689	0.98533	-0.15407	1.20139	-0.0426417	-0.484042	2.0808	0.926536
4118.59	-0.127451	-0.73543	0.0614773	0.154423	0.582902	-0.15063	1.50178	0.633718	-0.465207	1.85988	0.812672
4130.04	-0.166708	-0.285173	-0.293779	0.0269869	0.880901	-0.180069	1.73395	0.432649	-0.477619	1.38964	0.579775
4141.48	0.0428189	-0.312344	-0.164607	0.199751	0.488691	-0.0903369	1.82504	0.0453784	-0.433537	0.91541	0.436496
4152.93	-0.0715414	-0.636116	-0.113667	0.160628	0.203542	-0.0782341	2.08326	0.161381	-0.147534	1.45075	0.470174
4164.38	-0.0422306	-0.555042	-0.195479	0.0898392	0.251156	-0.178299	2.04045	-0.00156055	-0.52647	1.77613	0.115162
4175.82	0.156496	-0.475739	0.0689066	0.00209385	0.261994	-0.18562	1.90351	0.227582	-0.25297	1.73339	0.340651
4187.27	0.154239	-0.557451	0.0549214	0.0479837	0.492509	-0.0853982	2.17458	0.0681114	0.0711945	1.87131	0.627412
4198.72	0.190644	-0.510715	-0.00420486	0.0927494	0.258314	0.000151084	2.70911	-0.181956	-0.0350188	1.79549	0.349033
4210.16	0.0613061	-0.447918	0.12542	0.126472	0.0830824	-0.0703952	2.47019	0.271752	0.024372	1.8032	0.44971
4221.61	-0.0447706	-0.149613	0.278297	0.486571	0.175696	0.10279	2.41815	0.260073	-0.038159	1.61164	0.528466
4233.06	-0.0700323	0.0437738	0.136232	0.322219	0.00760343	0.0627605	2.74522	0.176998	0.189944	1.3199	0.523368
4244.51	0.148808	-0.09549	0.130052	0.182606	-0.300503	0.0136473	2.51141	0.274866	0.0216052	1.19982	0.541705
4255.95	0.0876137	0.0838979	0.452929	0.314039	-0.528387	0.239556	2.58007	0.147594	-0.0487703	1.1761	0.462864
4267.4	-0.0534186	0.0195614	0.30878	0.421529	-0.521076	0.0654748	2.49963	0.223742	0.199517	1.1942	0.473453
4278.85	0.0125816	-0.193614	0.141855	0.5896	-0.40177	0.156476	2.21485	0.170657	-0.0901381	0.736168	0.554317
4290.29	-0.122645	0.23784	0.280301	0.400823	-0.32173	0.340764	2.18181	0.187773	-0.00863559	0.825604	0.508796
4301.74	-0.0434686	0.310956	0.215615	0.578251	-0.226212	0.312555	1.75924	0.352443	0.379624	1.19695	0.464876
4313.19	-0.0487636	0.266901	0.290979	0.662499	-0.108482	0.300201	1.50766	0.2929	0.205719	1.08721	0.557303
4324.63	-0.070268	0.337004	0.401636	0.447078	-0.248004	0.267332	1.33098	0.257959	-0.00601144	1.01897	0.284329
4336.08	-0.0158837	-0.00443753	0.369351	0.630687	-0.379311	0.278858	0.889495	0.471346	-0.0471434	1.16105	0.23808
4347.53	-0.175539	-0.0935407	0.48379	0.614518	-0.0684508	-0.00523928	0.929398	0.601544	0.0594845	1.30635	0.315045
4358.97	-0.329558	-0.305573	0.480952	0.415319	-0.0404053	-0.235565	0.830126	0.561753	0.185148	0.962937	0.109744
4370.42	-0.25319	-0.397778	0.458797	0.272526	-0.286516	-0.219378	0.622505	1.01117	0.0761155	1.13088	0.384984
4381.87	0.0305181	-0.26593	0.424387	0.250982	-0.144462	-0.260553	0.753037	0.87915	-0.0117041	1.36994	0.404385
4393.31	0.149033	-0.379318	0.296555	-0.0100748	0.128045	-0.233796	0.747381	0.671367	-0.123729	0.83266	0.16124
4404.76	0.37082	-0.215805	0.223682	-0.128087	0.47219	-0.129801	0.958594	1.2429	-0.00629986	0.517688	0.414413
4416.21	0.523514	-0.381721	0.331923	0.320493	0.539829	-0.155033	1.10589	1.08602	0.100699	0.813417	0.339835
4427.66	0.64728	-0.513752	0.325184	0.33688	0.760513	-0.172291	1.11416	1.10031	0.170714	0.993364	0.0793039
4439.1	0.919795	-0.323087	0.148255	0.323397	1.35953	-0.0817728	1.17202	1.26659	0.0953623	0.518929	0.337833
4450.55	0.733435	-0.338244	0.314185	0.150334	1.25543	-0.0998956	0.993958	1.1739	0.0833826	0.711975	0.314017
4462	0.510278	-0.121512	0.396831	-0.145298	1.30063	-0.0669624	1.06972	1.42424	0.207339	0.867698	-0.0125822
4473.44	0.426503	-0.163569	0.448166	0.124448	1.65696	0.0560726	0.820065	1.257	-0.0270307	0.725095	0.034084
4484.89	0.378603	-0.117158	0.360964	0.0230101	1.19939	0.0631879	1.07444	1.11552	0.25099	1.14192	0.151078
4496.34	0.346408	0.0649587	0.364598	-0.114247	1.03624	-0.0207612	1.34157	1.0714	0.298349	0.988755	0.208214
4507.78	0.397154	-0.0423882	0.678526	-0.0838201	1.18859	-0.0109998	-0.0138683	1.05862	0.0938761	0.892187	0.246916
4519.23	0.485682	-0.0424279	0.441516	-0.290156	0.844105	0.079558	0.605399	1.27206	0.157808	0.846272	0.265268
4530.68	0.408385	-0.0606968	0.395625	-0.176403	0.73667	0.145226	1.92304	1.06904	0.0179848	0.845562	0.306127
4542.12	0.439467	-0.147551	0.382366	0.193237	0.66697	0.242078	1.65106	1.19932	-0.00334901	0.992956	0.215772
4553.57	0.24744	-0.435907	0.308614	0.239821	0.602707	0.239061	2.25157	1.23039	-0.198117	0.52572	0.123155
4565.02	0.260884	-0.476168	0.220868	0.152162	0.51792	0.246263	2.28153	0.837256	-0.112838	0.522886	0.128936
4576.47	0.302168	-0.545976	-0.317512	0.306981	0.648841	0.423979	1.90499	1.10925	0.0670998	0.839928	0.16614
4587.91	-0.00405408	-0.722205	-0.150126	0.454779	0.776495	0.440222	2.14269	0.942553	-0.0435099	0.755994	-0.00917299
4599.36	-0.0178033	-0.6183	-0.0260805	0.626197	0.235977	0.33783	1.7901	0.591603	0.0226773	0.4806	-0.278128
4610.8	-0.00594839	-0.969147	-0.198167	0.686118	0.338688	0.379406	1.50771	0.698462	-0.00591838	0.236916	-0.241985
4622.25	0.18283	-1.14942	-0.0772022	0.517072	0.686581	0.374275	1.65524	0.427732	-0.00604005	0.207568	-0.294425
4633.7	0.349624	-1.0516	-0.206548	0.73791	0.601194	0.452011	1.71508	0.284949	0.0136847	-0.106018	-0.456366
4645.14	0.39776	-1.25715	-0.221264	0.834499	0.496541	0.559896	1.0431	0.11433	-0.0148288	-0.137849	-0.422402
4656.6	0.594969	-1.24729	0.183351	0.512931	0.572375	0.396744	0.309316	-0.00901718	0.0126869	0.180048	-0.334547
4668.04	0.406943	-1.061	0.460902	0.419554	0.921119	0.188603	1.02865	0.218534	-0.00849797	0.192114	-0.114828
4679.49	0.315644	-0.974258	0.500196	0.476439	0.606648	0.224403	1.40469	0.275114	0.00348951	0.315994	-0.206051
4690.93	0.331944	-0.721292	0.512618	0.466372	0.411615	0.206753	1.09658	0.251167	0.000997011	0.386617	-0.346193
4702.38	0.140484	-0.463717	-0.0549348	0.338584	0.565096	0.0774248	1.23771	0.247497	-0.00399192	0.267234	0.00152638
4713.84	0.10406	-0.420423	-0.13452	0.411678	0.340866	0.107679	0.945847	0.112568	0.00514849	0.302892	-0.0216819
4725.26	0.0725835	-0.120612	0.454734	0.383903	0.380706	0.011843	0.927028	0.0351547	-0.00470521	0.332852	-0.128265
4736.73	0.228303	0.135509	0.151556	0.267291	0.485305	-0.0787306	1.02226	0.177437	0.00323491	0.324817	0.0210824
4748.16	0.154863	-0.000143555	0.052565	0.432981	0.488508	0.00635315	0.809417	0.15659	-0.00140289	0.339635	-0.00535324
4759.62	-0.178981	-0.111728	0.254913	0.265759	0.376814	-0.0387935	0.844742	0.0493135	-0.000231263	0.238385	-0.00103972
4771.07	-0.114608	-0.0827328	0.0371136	0.0865201	0.280835	-0.0972615	0.817857	-0.0285369	0.00132475	0.399061	0.00579649
4782.49	0.0118117	0.00779665	-0.046154	0.167591	0.440985	-0.0370915	0.871653	-0.000909847	-0.00177075	0.359812	-0.00948379
4793.99	0.0687934	0.0425037	-0.162031	0.0525445	0.374608	-0.0641037	0.652257	0.169222	0.00165249	0.150865	0.0431307
4805.37	0.138213	0.0126236	-0.1663	0.020772	0.334461	-0.0392884	0.403448	-0.0837744	-0.0011656	0.374045	-0.00594283
4816.88	0.245887	-0.0486063	-0.114295	-0.0562251	0.391197	0.0175308	0.453643	-0.143556	0.000537424	0.287219	-0.101422
4828.29	0.156784	-0.0333221	-0.33509	-0.123095	0.331147	-0.0470063	0.431308	0.195703	3.69834e-05	0.291702	0.0889615
4839.72	-0.21217	0.0896646	-0.365188	-0.0272099	0.229199	-0.0445374	0.565532	0.120204	-0.000432504	0.497033	0.125084
4851.25	-0.293293	-0.031623	-0.21207	-0.288019	0.0546559	-0.0168672	0.44711	-0.0723817	0.000603895	0.358199	0.0101109
4862.55	-0.136979	0.0534722	-0.200838	-0.120424	0.0112146	0.0527299	0.378788	0.152744	-0.000573645	0.244656	0.268278
4874.19	-0.173039	0.383986	-0.374342	0.31701	-0.101244	0.0825616	0.687729	0.344854	0.000406973	0.256981	0.28783
4885.43	-0.217607	0.142967	-0.426931	0.334485	-0.166565	0.0085233	0.634687	0.0970072	-0.000183751	0.364773	0.201911
4897.04	-0.193728	-0.0509981	-0.136201	0.506301	-0.0278904	0.137122	0.563843	-0.0054809	-2.38891e-05	0.416264	0.294559
4908.49	-0.239735	0.119686	-0.357788	0.424926	0.022825	0.185554	0.649512	0.0293222	0.000164366	0.357038	0.393863
4919.75	-0.104738	0.0536184	-0.436675	0.389544	-0.0229028	-0.0163873	0.495485	0.0798876	-0.000217808	0.154959	0.442804
4931.79	0.034469	-0.0211906	-0.0863374	0.458824	-0.115323	-0.0526842	0.216663	0.266204	0.000183383	0.0842981	0.332863
4942.33	0.0330365	0.0347401	-0.85325	-0.111716	-0.0139388	0.044511	-0.502653	0.482753	-8.39266e-05	0.663091	0.579173

## Sheet: plus6sep
Time	Fly1	Fly2	Fly3	Fly4	Fly5	Fly6	Fly7	Fly8	Fly9	Fly10
9.04816	-3.60742e-06	-1.27806e-06	9.97831e-06	6.27327e-06	1.23578e-05	-2.12153e-07	0.00188678	0.000704483	3.09749e-06	9.22219e-06
20.6654	-4.19224e-07	7.2261e-06	-1.31768e-05	-3.47511e-06	-1.04939e-05	2.18285e-06	-0.0023669	-0.000454398	-6.58062e-06	-9.83119e-06
32.0169	5.98496e-06	-1.31706e-05	1.31713e-05	-1.69067e-06	4.23397e-06	-4.2252e-06	0.00223604	-2.41456e-05	9.25207e-06	7.30652e-06
43.516	-1.18151e-05	1.70613e-05	-8.624e-06	8.43363e-06	6.10248e-06	5.66527e-06	-0.00140089	0.000648408	-9.85177e-06	-1.20809e-06
54.9464	1.60108e-05	-1.66986e-05	-7.9681e-07	-1.50892e-05	-1.86575e-05	-5.75491e-06	-1.20844e-05	-0.00132852	7.30682e-06	-7.85651e-06
66.3754	-1.64426e-05	1.04292e-05	1.38819e-05	1.93271e-05	3.00316e-05	3.89862e-06	0.00196768	0.00201527	-1.17953e-06	1.80034e-05
77.8637	1.13881e-05	2.05599e-06	-2.76537e-05	-1.86759e-05	-3.58109e-05	7.74505e-08	-0.0049182	-0.00237964	-7.91616e-06	-2.61879e-05
89.2613	-2.95444e-07	-1.90527e-05	3.76527e-05	1.13158e-05	3.16645e-05	-5.68926e-06	0.00718201	0.0021359	1.80866e-05	2.87689e-05
100.751	-1.5537e-05	3.65894e-05	-3.88555e-05	3.02168e-06	-1.48714e-05	1.16866e-05	-0.00899609	-0.00107398	-2.62758e-05	-2.25138e-05
112.171	3.26344e-05	-4.8848e-05	2.71697e-05	-2.23123e-05	-1.40684e-05	-1.61637e-05	0.00921001	-0.00131777	2.88331e-05	5.8842e-06
123.626	-4.56329e-05	4.93967e-05	-1.23395e-06	4.19787e-05	5.02595e-05	1.6942e-05	-0.00657534	0.00621634	-2.25224e-05	1.97265e-05
135.079	4.8339e-05	-3.31503e-05	-3.5971e-05	-5.53998e-05	-8.42607e-05	-1.22067e-05	-0.00362033	-0.0198392	5.81076e-06	-4.92467e-05
146.511	-3.55167e-05	-1.31409e-06	7.63342e-05	5.5339e-05	0.000103438	1.28449e-06	0.109555	0.0017711	1.98908e-05	7.41369e-05
157.976	5.09255e-06	4.97359e-05	-0.000107265	-3.61802e-05	-9.49843e-05	1.46471e-05	0.0435019	0.018407	-4.94831e-05	-8.38824e-05
169.408	3.98074e-05	-0.000101262	0.000114159	-3.45865e-06	5.02597e-05	-3.21918e-05	-0.0226249	-0.00709925	7.43937e-05	6.87919e-05
180.864	-8.97613e-05	0.000139432	-8.45921e-05	5.84786e-05	3.04877e-05	4.59775e-05	0.0137306	0.00233699	-8.40798e-05	-2.36822e-05
192.307	0.000129666	-0.000145505	1.3509e-05	-0.000116348	-0.000134491	-4.96811e-05	-0.00792703	0.000258267	6.88379e-05	-4.84497e-05
203.753	-0.000141566	0.000103965	9.1949e-05	0.000158313	0.000235627	3.78104e-05	0.00377853	-0.00158521	-2.34991e-05	0.000134039
215.204	0.000109649	-9.2261e-06	-0.000209811	-0.000163262	-0.000297838	-7.94429e-06	-0.00108253	0.00205988	-4.88939e-05	-0.000209213
226.645	-2.65941e-05	-0.000128299	0.000304645	0.000114014	0.000283402	-3.71482e-05	-0.00111383	-0.00185051	0.000134703	0.000243711
238.098	-0.000100354	0.000279093	-0.000334143	-4.88446e-06	-0.000165244	8.82908e-05	0.00203019	0.00123104	-0.000209967	-0.000208649
249.541	0.000245789	-0.000396733	0.000260817	-0.000151554	-5.92646e-05	-0.000130383	-0.00304743	-0.000569757	0.00024434	8.70432e-05
260.989	-0.000367306	0.000426835	-6.69276e-05	0.000321172	0.000357179	0.000145132	0.00414983	-2.54948e-05	-0.000208882	0.000115379
272.436	0.000413021	-0.000322472	-0.000231135	-0.000451036	-0.000656484	-0.000116024	-0.0050392	0.000423129	8.66043e-05	-0.000362689
283.882	-0.000335506	6.34258e-05	0.000574201	0.000479773	0.000854634	3.47701e-05	0.00538054	-0.000516057	0.00011667	0.000588513
295.331	0.000110008	0.000325754	-0.00086279	-0.000355171	-0.000841194	9.24058e-05	-0.00478674	0.00029981	-0.000364766	-0.000706106
306.776	0.000247581	-0.000765561	0.000974526	5.6e-05	0.00053255	-0.000240869	0.00299488	0.000114478	0.000590905	0.00062958
318.224	-0.000669283	0.00112587	-0.000796837	0.000387695	8.82904e-05	0.000368405	-0.000113265	-0.000538372	-0.000707883	-0.000303725
329.67	0.00103678	-0.0012493	0.000270062	-0.000883396	-0.00093837	-0.000422432	-0.00358636	0.0007666	0.000629582	-0.000263993
341.117	-0.00120112	0.000993494	0.000569574	0.00128172	0.00182173	0.000353698	0.00859079	-0.000639554	-0.000301257	0.000979093
352.564	0.00102091	-0.000286319	-0.00156243	-0.00140419	-0.00244903	-0.000134456	-0.0140142	9.9636e-05	-0.000268053	-0.00165508
364.011	-0.000413389	-0.000818496	0.00243043	0.00109313	0.00249614	-0.000223181	0.0187955	0.000770825	0.000982068	0.0020393
375.458	-0.000592752	0.00210434	-0.00282471	-0.000275307	-0.00169884	0.000654625	-0.0210017	-0.00174119	-0.00165474	-0.00187516
386.905	0.00181922	-0.00319595	0.00241617	-0.000977143	-2.92169e-05	-0.00104227	0.0195064	0.00246628	0.00203835	0.000994245
398.352	-0.00293266	0.00362736	-0.0010108	0.00241261	0.00248323	0.0012323	-0.00853315	-0.00256736	-0.00188096	0.000586949
409.799	0.00349552	-0.00297423	-0.00132617	-0.00361194	-0.00510248	-0.00107221	-0.122354	0.00175505	0.00101148	-0.00259879
421.245	-0.00308046	0.00102104	0.00417836	0.00406809	0.00701812	0.000467221	0.0991354	1.90223e-05	0.000547779	0.00450908
432.692	0.00139328	0.00202679	-0.00686044	-0.00334953	-0.0072433	0.000555407	-0.00124325	-0.00249669	-0.00257144	-0.00568093
444.139	0.00148091	-0.00552812	0.00836445	0.00119683	0.00497411	-0.00180184	-0.139403	0.00506529	0.00459168	0.00554212
455.586	-0.00499586	0.00848714	-0.00763892	0.00225652	-0.000167164	0.00291332	0.0440159	-0.0070542	-0.00602151	-0.00372422
467.033	0.00798419	-0.0100967	0.00347287	-0.00655606	-0.00625962	-0.00342338	-0.0192221	0.0077646	0.0058953	-0.000181738
478.48	-0.00930356	0.0098769	0.00419121	0.0104671	0.0124987	0.00297407	0.00467576	-0.00591781	-0.00279897	0.0066686
489.927	0.00973483	-0.00467121	-0.0102117	-0.0116344	-0.0175539	-0.00148332	0.0120831	0.00293019	-3.7208e-05	-0.0123459
501.374	-0.0038032	-0.00124748	0.0229218	0.0124351	0.0219447	-0.000723057	-0.0259683	0.00636381	0.00759676	0.0196451
512.821	-0.00103435	0.0143344	-0.0228524	-0.0031693	-0.0163427	0.00356141	0.119548	-0.0133013	-0.01317	-0.0231405
524.267	0.0128994	-0.0258407	0.0247352	-0.0051111	0.0135489	-0.00770317	0.041888	0.028084	0.0242156	0.0192119
535.714	-0.0175567	0.0383468	0.00252167	0.0280033	0.00383542	0.00956178	0.0158572	-0.0602657	-0.0349368	0.00150532
547.161	-0.0244844	-0.139215	-0.145263	-0.0596599	-0.0202735	-0.0132951	-0.122775	-0.0757164	-0.139564	-0.159861
558.608	-0.27805	-0.253039	-0.501947	-0.14339	0.0639237	0.0116008	-0.712139	-0.195613	-0.29729	-0.174199
570.055	-0.372934	-0.263167	-0.889555	-0.428116	-0.486726	-0.0113574	-0.765214	-0.463944	-0.323495	-0.188388
581.502	-0.398309	-0.421103	-0.831895	-0.600029	-0.706289	-0.00417064	-0.583568	-0.456449	-0.248106	0.00251854
592.949	-0.522286	-0.223247	-0.961414	-0.643189	-0.709752	0.209591	-0.80673	-0.426753	-0.509038	0.173238
604.396	-0.406606	-0.100434	-0.816213	-0.637488	-0.930702	0.220784	-0.830164	-0.399468	-0.451679	0.151164
615.842	-0.517599	-0.197314	-0.768213	-0.439808	-0.490224	0.279961	-0.926097	-0.439753	-0.147645	0.15322
627.289	-0.434968	-0.365993	-1.08723	-0.590606	-0.488959	0.41989	-1.00592	-0.204227	0.0241132	0.279933
638.736	-0.474441	-0.171329	-1.04872	-0.498086	-0.266064	0.407643	-0.950852	-0.00648786	0.195397	0.606597
650.183	-0.627452	0.238358	-1.27152	-0.407895	-0.120403	0.532475	-0.699483	-0.142598	0.24618	0.711906
661.63	-0.415356	0.0762151	-1.08863	-0.608659	-0.433864	0.483887	-0.184397	0.118944	0.357142	0.667969
673.077	-0.371203	0.0644507	-0.691991	-0.336288	0.152746	0.512523	-0.223748	0.167846	0.323448	0.592999
684.524	-0.146811	0.158564	-0.317416	-0.161151	0.0483982	0.758627	-0.238897	0.184464	0.541654	0.71474
695.971	-0.19903	0.147287	-0.313189	-0.20358	0.026263	0.720174	-0.105687	0.225049	0.835897	1.02972
707.418	-0.159133	0.0807852	-0.579472	-0.152471	0.159882	0.765894	-0.328662	0.0723623	0.813809	1.18061
718.864	0.199404	0.0523842	-0.0389964	-0.0379259	-0.588382	0.590461	-0.112962	0.292465	1.21136	1.49838
730.311	-0.0668087	0.304689	-0.338258	0.0886691	-0.359331	0.434932	0.265144	0.374829	1.27575	1.69219
741.758	0.0776524	0.0655719	-0.305885	-0.0131766	-0.134879	0.572543	0.110277	0.375307	1.2929	1.65574
753.205	0.398242	-0.062115	0.323483	0.17053	-0.335222	0.313176	0.101803	0.294384	1.48516	1.50497
764.652	0.124213	0.06986	-0.4164	0.434561	-0.131286	0.302925	0.383432	0.237791	1.12305	1.421
776.099	0.254571	-0.105241	-0.0433085	0.179036	-0.081444	-0.0258439	0.44698	0.340576	1.60944	1.77462
787.546	0.331125	-0.246268	0.585399	0.255348	0.279183	0.021413	0.609315	0.237609	1.2113	1.92545
798.993	0.286641	-0.238701	0.0623963	0.444111	0.132488	0.759224	0.85852	0.260728	0.0841647	2.29212
810.44	0.598972	-0.129582	0.150774	0.482478	-0.596486	0.374301	0.690105	0.26155	1.17168	2.49073
821.886	0.538427	-0.261026	0.234759	0.734723	-0.446845	0.0974594	0.55449	0.160652	1.77792	1.88156
833.333	0.627404	-0.219447	0.236634	0.464798	-0.648062	0.0368836	0.389065	0.187762	1.71029	2.2667
844.78	0.816997	-0.0365171	0.294353	0.161154	-0.521658	-0.0681315	0.101408	0.169869	1.91538	2.65174
856.227	0.8033	-0.104533	0.137971	0.460026	-0.213002	0.0933679	0.402979	0.0789653	1.65543	2.2395
867.674	0.914125	-0.0744949	0.290451	0.478899	-0.465073	-0.153961	0.514773	0.0750906	1.69373	1.87822
879.121	0.694567	0.0130714	0.0933873	0.177512	0.35876	-0.155756	0.390057	0.145837	1.58008	1.07248
890.568	0.683098	0.101009	-0.147209	0.377729	-0.163437	-0.227296	0.372149	0.124997	1.53174	0.545413
902.015	0.723871	0.0523045	0.256706	0.682644	-1.00689	-0.281638	0.526113	3.98794e-05	1.34019	0.107994
913.462	0.684548	0.00743726	-0.0863017	0.65733	-0.670607	-0.201987	1.14748	0.00870009	0.884442	-0.107436
924.908	0.830283	0.268931	-0.175903	0.718278	-0.778104	-0.34954	0.941419	0.107521	0.693839	0.24528
936.355	0.712797	0.239738	0.495365	0.487993	-0.478189	-0.00511538	0.416035	0.156357	0.768856	0.206167
947.802	0.824617	0.0427502	0.382517	0.830291	-0.549658	-0.0893691	0.513813	0.280858	0.963138	0.144654
959.249	0.951959	0.0763128	0.222802	1.35932	-0.39467	-0.233987	0.198455	0.127068	0.742433	-0.191329
970.696	0.919543	-0.0199752	0.308029	0.651986	0.0711587	0.0711122	-0.00345296	0.00765384	0.488669	-0.310534
982.143	0.910853	-0.0918221	0.357371	0.483385	-0.240199	-0.0368583	0.189242	0.231823	0.343602	0.0325821
993.59	0.802841	-0.172115	0.392915	0.761684	-0.05134	0.0216275	-0.237739	0.225146	0.400747	-0.104451
1005.04	0.728866	-0.204226	0.294703	0.422632	0.0106268	-0.00633743	-0.470616	0.125738	0.575234	0.0858516
1016.48	0.676333	-0.145142	0.370845	-0.0712984	0.0258822	-0.00679351	-0.230971	0.144649	0.688374	0.037547
1027.93	0.751238	-0.286852	0.173179	0.12632	0.0367526	0.0335758	-0.744483	0.250196	0.834592	-0.194624
1039.38	0.803311	-0.320834	-0.218627	0.624806	-0.337047	-0.251929	-0.919484	0.17798	0.329613	0.192727
1050.82	0.871219	-0.171715	0.0634875	0.35016	-0.0167081	-0.0376973	-0.690049	0.0594022	0.148619	0.503829
1062.27	0.650147	-0.160271	0.113886	0.312565	0.109962	-0.0666101	-1.07	0.0114287	0.404688	0.498095
1073.72	0.989665	-0.273797	-0.0574703	0.341514	0.0160126	-0.243384	-1.02401	-0.0772	0.345621	0.293186
1085.16	1.35914	-0.169196	-0.0511941	0.224944	0.319309	0.0579259	-0.855642	0.078236	0.539578	0.398996
1096.61	0.456892	-0.10637	-0.254603	0.347956	0.158889	-0.0190779	-0.525765	0.0053945	0.409218	0.408319
1108.06	0.881355	-0.270571	-0.214704	0.0727073	-0.0437645	-0.00266593	-0.103721	-0.112565	0.286729	0.32828
1119.51	1.49337	-0.184426	0.0590926	0.114439	-0.0101163	0.0192911	-0.255369	0.00949483	0.336644	0.400935
1130.95	0.929847	-0.0380291	0.22266	0.300613	-0.312412	-0.243498	-0.0742746	0.00574883	0.302805	0.215763
1142.4	1.07981	-0.0320451	-0.468411	0.25126	-0.334716	0.0578451	0.0556518	-0.0353544	0.465362	0.24679
1153.85	1.2542	-0.0195507	-0.55159	0.539676	-0.174048	0.0863	-0.271176	0.0383265	0.416258	0.236862
1165.29	1.43811	-0.092124	0.0993922	0.564958	-0.408457	-0.215129	-0.596883	0.268866	0.54168	0.205391
1176.74	1.59563	-0.104477	-0.31876	0.458925	-0.298465	0.0484797	-0.983741	0.235305	0.548189	0.2229
1188.19	1.42736	0.100752	-0.178093	0.72176	-0.277063	-0.00672072	-1.46211	-0.0440526	0.358146	0.0767076
1199.63	1.50415	0.00256219	0.0332127	0.825354	-0.385589	-0.0254064	-1.90442	0.00914472	0.454763	0.128937
1211.08	1.45824	-0.0996994	-0.107768	0.611961	-0.166259	0.0744377	-1.86219	0.317231	0.376007	-0.0122936
1222.53	1.20173	0.173891	0.23911	0.657377	-0.370015	-0.219696	-1.64154	0.229581	0.365263	-0.0693789
1233.97	1.04989	-0.0145932	0.146784	0.648859	-0.208422	-0.0805114	-1.41829	0.124474	0.36431	-0.0128318
1245.42	1.06131	-0.0959505	0.30395	0.386314	0.045643	-0.179706	-0.998016	0.242313	0.036675	-0.129715
1256.87	1.23881	0.100302	0.562969	0.518599	-0.0262395	-0.137299	-0.646228	0.120185	-0.156035	-0.123213
1268.31	1.27323	-0.146472	0.621179	0.409478	0.0418326	0.0805837	-0.198623	0.238943	0.101933	-0.165029
1279.76	1.12238	0.0133822	0.815874	0.336143	-0.235703	-0.43489	0.185342	0.0732558	0.320023	-0.0807524
1291.21	0.981452	0.300393	0.910506	0.587064	-0.0709505	-0.209837	0.147333	0.0946465	0.343408	-0.102128
1302.66	0.76356	0.223388	0.960237	0.468691	-0.00295052	0.105735	-0.127846	0.505397	0.418983	0.02857
1314.1	0.467268	0.321736	0.952722	0.560731	-0.277762	-0.0642052	-0.402395	0.23153	0.428286	0.257304
1325.55	0.299879	0.164508	0.767806	0.664075	0.0342533	0.0359959	-0.79656	0.42253	0.444073	0.256405
1337	0.338354	-0.00246721	0.615665	0.59545	0.0204251	-0.0118803	-1.46443	0.640715	0.510523	0.555036
1348.44	0.294969	0.189946	0.839757	0.44787	-0.185696	-0.00534566	-1.84694	0.393966	0.557175	0.638875
1359.89	0.315797	0.158853	0.854244	0.469067	-0.128915	0.0175712	-1.87117	0.520443	0.462726	0.610969
1371.34	0.465803	0.0395192	0.955347	0.742951	0.0198729	-0.0199812	-1.86075	0.538205	0.389106	0.890836
1382.78	0.357844	-0.025998	0.92114	0.585468	0.0299651	0.0172954	-1.50111	0.532952	0.407759	1.17261
1394.23	0.353333	-0.0487318	0.683203	0.654768	-0.0656687	-0.010164	-1.052	0.624348	0.382052	1.22639
1405.68	0.359705	-0.0695131	0.718886	0.552697	0.0960667	-3.90321e-05	-0.818336	0.553593	0.491097	1.34146
1417.12	0.36134	-0.3224	0.494936	0.338011	-0.124117	0.0113211	-0.699123	0.555515	0.500564	1.54869
1428.57	0.652196	-0.173538	0.874638	0.6975	0.0708744	-0.0198959	-0.625037	0.587483	0.472864	1.75788
1440.02	0.484495	0.0839898	1.04204	0.494432	0.275005	0.022768	-0.473895	0.549477	0.491972	1.22936
1451.47	0.412436	-0.331953	0.935548	0.376187	-0.317829	-0.0181875	-0.554374	0.605151	0.481222	0.0384366
1462.91	0.668015	-0.123727	1.14727	0.422102	-0.262603	0.00340194	-0.78895	0.655292	0.593742	0.989636
1474.36	0.444275	0.241897	0.492381	0.261213	0.259258	0.0297144	-0.775866	0.620662	0.44605	2.19916
1485.81	0.291498	-0.291808	0.518543	0.486639	0.902813	-0.148363	-1.03816	0.592043	0.371837	1.84545
1497.25	0.584211	0.187781	1.13265	0.707912	0.486054	0.0518934	-1.42256	0.616088	0.482798	2.28674
1508.7	0.716261	0.40749	1.04476	0.901348	-0.024593	0.108106	-1.08974	0.617665	0.24884	2.04303
1520.15	0.474933	-0.330682	0.82998	0.74527	0.0564522	-0.093282	-0.936685	0.542473	0.103709	0.550347
1531.59	0.378597	0.100727	0.938066	0.591628	-0.655659	0.0478061	-0.897541	0.575298	0.00192395	0.155409
1543.04	0.454621	0.183287	1.34478	0.918618	-0.281667	0.0165078	-0.144881	0.631513	-0.170475	1.32515
1554.49	0.488241	-0.243155	1.29084	1.02938	0.151948	-0.0184347	0.230525	0.675689	-0.0453593	2.53388
1565.93	0.664723	-0.182068	1.47966	1.26552	-0.101403	0.0190248	0.368383	0.639379	0.0144724	2.45491
1577.38	0.94029	-0.0768791	1.93177	1.63185	0.0597247	-0.0177162	0.464647	0.588029	0.105693	2.10606
1588.83	0.927219	0.104421	1.80209	1.76909	-0.0301913	0.0149169	0.690788	0.988416	0.359751	2.34594
1600.27	0.975107	0.141199	1.74143	2.04324	0.0107704	-0.0116722	1.21843	1.44145	0.380699	2.9117
1611.72	1.27585	0.208522	1.70852	2.16647	0.00078931	0.00763535	1.45735	1.531	0.66563	3.47238
1623.17	1.35267	0.221084	1.3772	2.32583	-0.00912432	-0.00266937	1.86383	1.71754	0.949039	3.43226
1634.62	1.37157	0.185972	1.41611	2.51302	0.00614252	-0.00326165	2.01093	2.18867	0.887363	3.31445
1646.06	1.54661	0.510709	1.69126	2.52797	-0.00310365	0.0100451	2.07939	2.13033	1.33015	3.36964
1657.51	1.68506	0.746242	1.73331	2.67057	-0.0139361	-0.0178005	2.61059	1.7241	1.81011	3.76422
1668.96	1.63816	0.866561	1.84517	2.19636	0.0494077	0.0228358	3.26164	2.18225	1.9479	3.88258
1680.4	1.75435	1.096	1.82766	1.97758	0.600764	-0.0252318	3.76833	2.39154	2.22089	3.5107
1691.85	1.98118	0.926029	1.75175	2.3071	0.699941	0.0221156	3.82707	2.14802	2.32833	4.13715
1703.3	1.82874	0.755303	1.5864	2.11903	0.74951	-0.00906388	3.80475	2.42482	2.30231	4.18035
1714.74	1.89715	0.671371	1.13172	2.16029	0.354458	-0.0302368	3.60127	2.02807	2.45546	3.85814
1726.19	1.87438	0.354776	1.1423	2.12869	0.335031	0.177632	3.16471	1.57465	2.58858	4.04921
1737.64	1.53945	0.448698	1.23397	1.82486	1.94521	0.121962	3.18206	1.83156	2.90531	4.2515
1749.08	1.48529	0.293951	1.04046	1.61062	1.51051	0.0042207	3.40326	2.04075	3.04728	4.55935
1760.53	1.0651	-0.0318459	1.20428	1.22582	0.625218	-0.0896763	3.24253	2.41465	2.79333	3.2601
1771.98	0.611758	0.215285	1.33664	0.95372	1.10058	0.194265	2.93831	2.32403	2.91378	2.69474
1783.42	0.578006	0.299313	1.02043	0.567776	0.941231	0.671099	3.23576	2.23428	2.77029	3.69062
1794.87	0.54227	0.272899	0.922922	0.2693	1.72826	1.03314	3.50087	2.49121	2.6491	4.04016
1806.32	0.381734	0.378176	1.1694	0.307398	3.08417	1.5403	3.06476	2.23099	2.9665	3.98783
1817.77	0.128814	0.392825	1.19482	0.145185	3.82029	1.76504	3.45075	2.28026	2.44036	3.86746
1829.21	0.0833481	0.367243	1.05971	0.112373	2.86326	1.8347	3.87225	2.30921	2.2727	3.9786
1840.66	0.0379298	0.447296	0.873651	0.215834	2.31322	1.64697	3.63663	2.3093	2.68947	3.83583
1852.11	0.0496288	0.584358	0.949112	0.290799	3.62646	1.63647	3.59698	2.4917	2.30223	3.53869
1863.55	0.28336	0.574102	0.813554	0.418836	3.66965	2.09342	3.30211	2.15075	2.29731	3.10611
1875	0.263911	0.477203	0.5837	0.349232	3.79232	2.14751	3.79068	2.34087	2.44089	2.97575
1886.45	0.276314	0.440326	0.567432	0.4051	3.616	1.78588	3.39008	2.56399	1.99487	2.60216
1897.89	0.272966	0.370599	0.256637	0.394161	3.2911	1.84674	2.0225	2.13796	1.70345	1.98102
1909.34	0.0691993	0.327106	0.486051	0.13256	3.08719	1.4688	1.96907	2.15917	1.58023	2.07878
1920.79	0.105344	0.407472	0.433447	-0.0647459	1.70488	0.757221	1.38089	2.2715	1.58213	1.72051
1932.23	0.19922	0.601411	0.179677	-0.0544989	2.54887	1.65972	2.20586	2.09257	1.16775	1.56327
1943.68	0.291071	0.567493	0.511678	0.192703	2.85994	2.46487	3.456	1.95414	0.832789	1.15367
1955.13	0.369073	0.261945	0.455798	-0.034851	2.04298	2.08175	3.11456	1.95391	1.15185	0.636531
1966.58	0.477381	0.247648	0.30652	-0.152147	2.93219	1.8607	3.03212	1.93956	0.967165	0.727424
1978.02	0.697821	0.387351	0.354156	0.197991	2.53293	1.64111	2.80768	1.63577	0.711214	0.491269
1989.47	0.665021	0.344764	0.432624	0.182996	1.77727	1.5082	3.18689	1.5336	0.588416	0.817185
2000.92	0.726696	0.327061	0.584972	0.288881	2.3248	1.48215	3.25349	1.64356	0.190569	0.93442
2012.36	0.792347	0.468838	0.561871	0.387399	2.07856	1.34692	3.39203	1.5742	0.401978	0.749065
2023.81	0.532366	0.217355	0.40037	0.360365	1.51998	1.54058	3.62853	1.35464	0.506253	0.88813
2035.26	0.52303	-0.0154253	0.371029	0.437818	2.0706	1.55765	3.27165	1.30505	0.208111	1.0175
2046.7	0.474815	0.254825	0.138757	0.414794	0.594989	1.19734	3.44915	1.39895	0.64013	1.31115
2058.15	0.343832	0.245468	0.156199	0.418614	-0.696071	1.18542	3.17614	1.27749	1.01359	1.5115
2069.6	0.350424	0.104698	0.255386	0.488336	0.967327	1.20942	3.04879	1.38876	1.25432	1.40288
2081.04	0.186896	0.0289883	0.106464	0.528621	1.25116	1.00083	3.04693	1.61824	1.42989	1.03641
2092.49	0.1772	0.0470297	0.448754	0.427788	0.960212	1.262	2.91183	1.82734	0.986978	1.6084
2103.94	0.0845348	0.129838	0.397274	0.247766	0.814234	1.62344	3.17118	1.70286	0.95789	2.0436
2115.38	-0.152111	0.00205514	0.248922	0.204935	0.814282	1.31833	2.71225	1.4811	1.08885	2.0993
2126.83	-0.144087	-0.026235	0.504111	0.420077	0.882838	1.05622	2.08542	1.73499	0.989496	2.51351
2138.28	-0.218757	0.145505	0.734626	0.460594	0.461519	1.22234	2.46256	1.77957	1.14381	1.69019
2149.73	-0.240277	0.207508	1.12233	0.324893	1.17939	1.32025	2.91208	1.90135	0.978065	1.81692
2161.17	-0.157901	0.208015	0.917183	0.137401	1.16012	0.929113	2.4459	1.98723	1.00155	1.99807
2172.62	-0.154375	0.140347	0.698122	-0.135387	1.11649	0.800482	2.78057	1.98359	1.5305	0.863619
2184.07	-0.0152713	0.105389	1.09469	-0.298417	1.58562	1.40153	3.32336	2.23581	1.59774	1.75317
2195.51	0.0917944	0.418317	1.39539	-0.447162	1.36793	1.64589	2.59014	2.16719	1.572	2.45501
2206.96	0.0513246	0.368011	1.51292	-0.465808	1.273	1.74818	2.48362	2.24086	1.71897	2.30597
2218.41	0.105741	0.182117	1.57527	-0.305606	1.04726	2.1102	2.84319	2.54752	1.82766	2.48914
2229.85	0.383377	0.414665	1.55085	-0.143255	1.16465	2.07899	2.70201	2.42291	1.67695	2.20864
2241.3	0.51217	0.198282	1.54038	-0.10418	1.1061	1.76629	2.31165	2.4489	1.43744	2.14814
2252.75	0.205509	0.134786	1.72094	-0.102424	1.22686	1.77204	2.14126	2.66715	1.53112	1.77299
2264.19	0.137139	0.424715	1.61629	0.0354633	1.34829	2.02862	2.51587	2.54084	1.52523	1.94665
2275.64	0.184175	0.138988	1.94056	0.266552	1.05783	1.62304	2.76831	2.52137	1.61106	1.69027
2287.09	0.133906	0.00318317	2.4288	0.157335	1.2334	1.50314	2.85152	2.6102	1.8054	0.853662
2298.53	0.305798	0.144487	2.09243	0.0972125	1.17824	2.15215	2.60749	2.57393	1.73276	1.54961
2309.98	0.30107	0.0838472	2.03627	0.458293	1.65796	1.99764	2.1137	2.58783	1.78909	1.70741
2321.43	0.285152	0.091067	1.88423	0.417274	1.10152	1.62667	2.14106	2.50767	1.82445	1.4415
2332.88	0.189725	0.0849046	1.71545	0.552517	0.482598	1.23408	2.25975	2.32091	1.68547	1.5621
2344.32	0.0739467	0.247194	2.08072	0.777487	1.14674	1.26261	2.25554	2.18266	1.70817	1.68291
2355.77	0.110549	0.446953	1.91831	0.558227	0.922419	1.45967	2.44145	2.19843	1.4912	1.94604
2367.22	0.207222	0.0862321	1.64755	0.771883	1.01446	0.0947513	2.66524	2.27103	1.26264	1.52648
2378.66	0.53836	-0.209664	2.01669	0.697357	1.01102	-0.0894998	2.47912	1.94404	1.53791	1.06222
2390.11	0.304686	-0.0710383	2.06908	0.335974	1.38459	0.402079	1.77907	1.49222	1.59247	0.655634
2401.56	0.029959	-0.0884489	1.70476	0.379517	1.46395	0.00211842	1.56962	1.29449	1.34002	-0.175846
2413	0.295636	-0.106599	1.44731	0.420159	0.756936	0.850437	1.67724	1.25466	1.02213	-0.892268
2424.45	0.0351954	0.0613371	1.0576	0.527963	1.00631	0.422642	1.52485	1.14458	0.816466	-0.981536
2435.9	0.0614035	-0.334792	0.609301	0.332049	0.618079	-0.642519	2.31663	0.770762	0.893651	-0.874015
2447.34	0.346206	-0.778513	0.346896	0.222936	0.760773	-0.295343	2.74119	0.863779	0.811478	-0.878636
2458.79	-0.0123655	-0.193832	0.273478	0.500165	1.26779	-0.382996	1.85357	0.868034	0.702914	-0.635802
2470.24	0.0197407	0.061848	0.33889	0.450635	0.482498	-0.466079	2.36143	0.683704	0.663402	-0.651973
2481.68	-0.102765	-0.296586	0.226996	0.525053	0.63462	-0.428272	2.70032	0.812888	0.743094	-0.653365
2493.13	-0.368374	-0.249196	-0.146383	0.516247	1.18131	-0.850196	2.12375	0.665713	0.677695	-0.085382
2504.58	-0.157416	-0.343618	-0.192758	0.304249	0.669868	-0.508358	3.3908	0.741674	0.451723	0.304155
2516.03	-0.235	-0.348833	-0.177342	0.484414	0.824387	0.241355	4.04278	0.77041	0.74042	0.34554
2527.47	0.00614781	-0.11558	-0.2689	0.55068	1.17939	0.116169	3.74914	0.821756	0.570256	0.388333
2538.92	0.0446457	-0.518702	-0.294421	0.60595	0.691216	0.497868	4.05142	0.808498	0.123775	0.426245
2550.37	0.0378632	-0.564874	-0.545464	0.716471	0.754313	1.01177	4.00606	0.572279	0.296518	0.45376
2561.81	0.0881245	-0.257659	-0.567699	0.611126	0.67058	0.367797	4.04825	0.795221	0.371089	0.345804
2573.26	-0.119135	-0.618384	-0.359939	0.637271	0.853913	0.0587149	3.95817	0.777832	0.402307	0.330125
2584.71	0.340578	-0.565737	-0.478257	0.586824	1.48458	0.541154	3.8736	0.787365	0.243901	0.467009
2596.15	-0.0843224	-0.557244	-0.736709	0.407602	0.943233	0.684232	3.61614	0.902107	0.276687	0.417813
2607.6	-0.374277	-0.708984	-0.732054	0.330914	0.551632	0.429863	2.95417	0.818232	0.538345	0.26417
2619.05	0.142659	-0.74742	-0.798904	0.541167	0.71942	0.628119	2.63981	0.936423	0.46314	0.291199
2630.49	0.0398131	-1.08328	-0.87039	0.489644	0.952078	0.57213	2.47623	0.977452	0.402817	0.509306
2641.94	0.141372	-0.732125	-0.476761	0.408744	1.18976	-0.164685	2.35791	1.00104	0.193577	0.446736
2653.39	-0.0639964	-0.388735	-0.257008	0.889376	0.983003	-0.217048	1.90874	1.08636	0.122376	0.482826
2664.84	-0.0622122	-0.497511	-0.309981	0.850062	0.806125	-0.0289573	1.33096	1.06737	0.133599	0.588457
2676.28	-0.0244291	-0.808266	-0.293998	0.73007	0.626112	-0.0186785	1.295	1.05333	0.0639215	0.514141
2687.73	-0.46007	-1.03848	-0.302397	0.794463	0.521386	-0.0611924	1.20214	1.26357	0.0877598	0.845666
2699.18	-0.39116	-0.927065	-0.509978	0.863891	0.669724	-0.290691	0.927681	1.23861	0.234835	0.985926
2710.62	-0.371101	-1.12512	-0.502279	1.08028	0.458147	0.251979	0.619098	1.06161	0.345293	0.932997
2722.07	0.458684	-1.02293	-0.100839	0.953545	0.616261	0.818639	0.282572	1.41439	0.243115	0.960109
2733.52	0.990038	-0.826457	-0.200746	1.11802	1.08291	0.72898	0.480813	1.56587	0.412566	1.03467
2744.96	0.235116	-0.935468	-0.186439	1.45351	0.854489	0.743152	0.0365471	1.60937	0.32293	1.36717
2756.41	0.189547	-0.892712	0.0324489	1.39398	0.705895	0.558668	-0.510326	1.63529	0.407662	1.31265
2767.86	0.187411	-1.0221	0.181631	1.13643	0.608625	0.287216	0.0425682	1.65033	0.708672	1.25511
2779.3	-0.0876183	-1.01182	0.726254	1.36529	0.283453	0.482347	0.0773949	2.01206	0.444859	1.65874
2790.75	0.0456292	-0.718416	0.660448	1.54125	0.516229	0.851381	0.418534	1.65379	0.567241	1.86295
2802.2	-0.0526674	-0.68697	0.384018	1.03715	0.860519	1.10595	1.11964	1.45301	0.547329	1.5806
2813.64	0.204675	-1.11095	0.612982	0.852528	0.93073	0.891345	0.578733	1.76436	0.435671	1.3186
2825.09	0.487948	-1.25411	0.571348	0.834203	0.688244	0.701547	0.290257	1.56137	0.403872	1.58658
2836.54	0.00860657	-0.810473	0.243558	0.826881	0.544776	0.291989	0.468152	1.54682	-0.0385427	1.34729
2847.99	-0.0305769	-0.957771	0.628154	0.940247	0.997126	-1.02644	0.472202	1.78353	-0.0703498	1.21519
2859.43	0.00333776	-1.04031	0.617697	0.805624	1.00705	-1.09305	0.960927	1.80069	0.133566	1.72931
2870.88	-0.0911055	-0.392238	0.313353	0.729887	1.05825	-0.860663	0.928252	1.66106	0.456156	1.535
2882.33	-0.0424646	-0.475692	0.909428	0.698051	1.25469	-1.25261	0.734343	1.57238	0.579623	1.43029
2893.77	-0.0111876	-0.987467	0.460204	0.743474	0.969594	-0.840504	1.07738	1.68294	0.594113	1.07556
2905.22	0.388428	-1.40035	0.382444	1.00603	1.13547	-1.27639	1.34811	1.7769	0.913997	0.940409
2916.67	0.35891	-1.0603	0.414493	1.01126	1.38367	-1.42054	1.68421	1.43013	0.86099	1.51681
2928.11	0.347105	-0.0176603	0.581587	1.09222	1.0041	-0.476583	1.63621	1.3936	0.968857	1.13249
2939.56	0.219703	-0.652346	1.61366	1.14028	0.768841	-0.065906	1.84131	1.67034	1.01913	1.20909
2951.01	-0.38029	-1.25156	0.364861	0.829342	0.883433	0.864426	2.59311	1.47511	0.894275	1.57286
2962.45	-0.236789	-1.07914	-0.404782	1.06836	0.847412	1.23762	2.62364	1.50278	1.07149	1.5425
2973.9	-0.240895	-1.35893	0.0164514	1.22369	1.04248	1.0874	2.57616	1.66121	0.989892	1.50305
2985.35	-0.402395	-1.09826	-0.201794	1.16128	1.02761	1.2675	2.94241	1.8369	1.19302	1.05822
2996.79	-0.206776	-1.02284	-0.407136	1.32576	1.08405	0.792685	3.07807	2.02951	1.25875	1.06021
3008.24	-0.204962	-1.00504	-0.392183	1.26725	1.26776	1.32874	3.07882	1.96921	1.2342	1.42584
3019.69	-0.271934	-0.934584	0.448194	1.23355	1.16746	1.34724	2.96379	1.97327	1.49055	1.56557
3031.14	-0.246183	-1.25924	0.0900377	0.985719	1.06324	0.939821	2.88337	1.90665	1.2981	1.48214
3042.58	-0.178534	-1.35786	-0.502783	0.69873	0.833389	1.91396	2.74604	2.08182	1.27977	1.53761
3054.03	-0.267601	-1.49442	0.031985	0.597468	1.42793	1.53088	2.48754	2.23338	1.1519	1.08776
3065.48	-0.218741	-1.26035	0.0648627	0.273346	1.60109	0.977496	2.43689	1.95045	0.923494	0.714528
3076.92	0.0678177	-0.825148	0.035125	0.160149	1.28888	1.08903	2.32923	1.9934	0.960064	0.93385
3088.37	0.188745	-1.50425	-0.542696	-0.0530569	1.78368	1.0202	2.34822	1.99795	0.903447	0.282065
3099.82	0.194115	-1.42034	-0.421032	-0.506861	2.0006	1.06119	2.50029	1.91096	0.878319	0.123003
3111.26	0.431976	-0.624721	0.101401	-0.468692	1.98602	0.614563	2.25334	2.0795	0.67326	0.105339
3122.71	0.397006	-1.05611	-0.421857	-0.61957	1.76058	0.735045	2.05025	2.1329	0.797658	-0.213769
3134.16	0.308682	-1.11691	-0.251918	-0.731915	1.56874	1.13346	1.92398	2.27806	0.986783	0.470343
3145.6	0.471244	-0.940029	-0.0360712	-0.44128	1.6441	0.715374	2.0015	2.23748	0.681419	0.427195
3157.05	0.0716145	-1.03829	-0.340746	-0.503956	1.4638	0.487982	2.49387	2.07617	1.05043	0.452836
3168.5	-0.0607206	-0.729113	-0.468031	-0.38583	1.60717	0.725039	2.59135	2.12455	1.0135	0.670089
3179.94	0.119861	-0.646699	-0.452818	-0.337415	1.71284	0.570456	2.27028	2.21875	0.326332	0.170295
3191.39	0.0568932	-0.839115	-0.418544	-0.481579	1.2768	0.226917	2.3024	2.43609	0.464344	0.479967
3202.84	0.387	-0.983156	-0.461985	-0.568236	1.47521	-0.016472	2.52397	2.10115	0.278938	0.383133
3214.29	0.341424	-0.779777	-0.336584	-0.971591	2.00992	0.0856384	2.51652	1.59186	-0.060366	0.133238
3225.73	0.287882	-0.357044	-0.129851	-1.11555	1.86648	0.206164	1.9641	1.84163	0.103037	0.388556
3237.18	0.549524	-0.228253	0.15085	-0.831188	1.63266	-0.0463715	1.40302	2.25026	0.270624	0.485706
3248.63	0.206622	-0.400408	0.284432	-0.52984	1.25132	-0.148647	1.72878	2.15828	0.100313	0.823569
3260.07	0.331675	-0.548358	0.174786	-0.804698	0.709023	-0.0858225	1.81331	1.97066	-0.0517609	0.855703
3271.52	0.578642	-0.402037	0.254854	-0.857265	1.02005	-0.106833	1.7089	2.01407	0.278128	1.03439
3282.97	0.33664	-0.423443	0.257649	-0.4277	1.43747	-0.0879381	1.61195	2.21393	0.252004	1.31521
3294.41	0.510522	-0.254692	0.531686	-0.866335	1.25592	0.09009	1.41731	2.27985	0.242537	1.07077
3305.86	0.586252	0.211401	0.87375	-0.290041	1.23465	0.147301	1.60744	1.57806	0.284366	0.708211
3317.31	0.499471	0.151866	0.480023	0.551028	1.11338	0.0228284	1.17751	1.6925	0.178996	0.560418
3328.75	0.443009	0.0359952	0.809324	0.188969	1.16737	0.0952742	1.32223	1.90947	0.274026	0.177117
3340.2	0.406022	0.0366512	1.07063	0.681909	1.42328	0.504282	1.44106	1.00271	0.286576	-0.175945
3351.65	0.408366	-0.0863298	0.494256	0.823803	1.4814	0.703745	0.808585	1.30894	0.457054	0.022652
3363.1	0.367535	-0.208348	0.562198	0.963738	1.28946	0.825715	1.25471	1.67329	0.517559	-0.496453
3374.54	0.39091	-0.267622	0.494607	1.56102	0.554609	1.23563	1.44625	1.69723	0.695319	-0.72723
3385.99	0.155561	-0.020954	0.487685	1.23406	0.977806	1.12627	1.77358	1.78416	1.00082	-0.525171
3397.44	0.074874	0.123198	0.494468	1.07324	1.74967	1.04816	1.77409	1.17885	0.823578	-0.968112
3408.88	0.146757	0.0802031	0.23632	1.1939	1.34201	1.4382	1.2725	1.31155	0.740543	-0.65836
3420.33	0.22639	0.180122	0.341037	1.24035	1.16824	1.47885	2.31739	1.54612	0.854022	-0.370234
3431.78	0.375973	0.0689194	0.248879	1.2515	0.810256	1.27472	1.86772	1.36139	0.849308	-0.731923
3443.22	0.385859	0.107599	0.321414	1.33059	0.685881	1.19591	0.906333	1.37574	1.02657	-0.774576
3454.67	0.436074	0.365404	0.514899	1.23065	1.2556	1.28792	1.60458	1.39701	1.03543	-0.996245
3466.12	0.429064	0.252518	0.37304	0.969617	1.05805	0.774973	1.63057	0.9582	1.04492	-0.95668
3477.56	0.663168	0.146358	0.346796	1.12451	1.06851	0.434618	1.43593	0.463279	1.14046	-0.890695
3489.01	0.888352	0.103605	0.446612	1.19242	1.30041	0.691302	1.55943	0.364323	0.737416	-1.58234
3500.46	0.876489	0.200241	0.548572	1.16727	1.09278	0.473944	1.73892	-0.0911319	0.848408	-1.31289
3511.9	0.939996	0.549312	0.555068	1.03079	1.38863	0.419025	1.21782	-0.090964	0.768968	-0.870732
3523.35	0.967246	0.625545	0.416653	0.549455	0.979025	0.631626	0.890863	0.236788	0.526709	-1.09976
3534.8	0.893411	0.571913	0.320944	0.22416	0.884096	0.219617	1.22642	0.163678	0.714338	-0.76157
3546.25	0.534396	0.745397	0.385971	0.290703	1.34349	-0.296807	0.786445	0.176675	0.371095	-0.0370368
3557.69	0.657908	0.754429	0.47552	0.317885	0.675546	-0.294924	0.747502	0.29205	0.12177	0.154792
3569.14	0.91819	0.597758	0.4536	0.437139	0.713411	-0.465573	0.814849	0.509001	-0.00368611	-0.129099
3580.59	0.806822	0.585757	0.590129	0.576014	0.88357	-0.73222	0.376539	-0.100171	0.0471917	0.13064
3592.03	0.792622	0.457767	0.775098	0.273658	0.645192	-0.670213	0.658569	-0.357739	-0.415281	0.304298
3603.48	0.651977	0.464076	0.614498	-0.189945	0.583118	-0.629185	1.27183	0.505953	-0.994559	0.733366
3614.93	0.709026	0.304324	0.404737	-0.571776	0.301177	-0.930259	1.03092	0.341353	-0.522615	1.02811
3626.37	0.634809	0.354693	0.327256	-0.589538	0.657139	-1.23878	0.669026	0.331701	-0.484751	0.589141
3637.82	0.572841	0.879455	0.210597	-0.535398	0.315241	-1.07865	0.992365	0.710845	-0.711436	0.884696
3649.27	0.783136	0.618236	0.553621	-0.470387	-0.328819	-1.00258	0.932129	0.731873	-0.514456	1.11174
3660.71	0.538865	0.58277	0.665954	-0.349546	0.258068	-0.941015	1.24764	0.899233	-0.331662	1.37321
3672.16	0.602095	0.879338	0.0015489	-0.343183	0.170129	-0.592371	1.84829	0.784135	-0.152905	1.54434
3683.61	0.78795	0.642203	0.435491	-0.357791	-0.0166577	-0.566314	1.50651	0.85899	-0.0112	1.38783
3695.05	0.713375	0.479484	0.902224	-0.677224	0.30261	-0.573404	1.00348	0.753684	0.173896	2.00752
3706.5	0.653464	0.361067	0.586753	-0.69217	0.0632048	-0.404865	0.900382	0.87064	0.140086	1.99833
3717.95	0.154479	0.305897	0.939846	-0.648709	0.150836	-0.354437	1.16481	0.953033	-0.0849497	1.58519
3729.4	-0.027821	0.36623	0.857739	-0.77021	0.292521	-0.279299	0.9094	0.371004	0.0228163	1.86714
3740.84	-0.0017053	0.308445	0.600472	-0.443007	0.27925	-0.412326	1.10812	0.836284	0.0422922	1.91047
3752.29	-0.0318169	0.0748045	0.59433	-0.63138	0.304708	-0.282348	1.58981	1.15976	-0.0153511	1.61734
3763.74	0.0819152	0.181079	0.424921	-0.745746	0.0122291	-0.124567	1.14305	0.867873	0.0907018	1.24321
3775.18	-0.0718104	0.298625	0.674453	-0.558072	0.00354499	-0.196985	1.17302	1.07826	0.0485608	0.762467
3786.63	0.0270478	0.21761	0.678113	-0.784037	0.0025139	0.333269	1.15598	0.940649	0.190799	0.516187
3798.08	0.299085	0.39746	0.611631	-0.588544	-0.0332821	0.424814	1.04158	1.05991	0.299472	0.101158
3809.52	0.297712	0.275352	0.627228	-0.512708	0.201628	0.356678	0.744324	1.52056	0.167183	-0.431668
3820.97	0.308075	-0.0831615	0.580715	-0.486834	0.409936	1.02953	0.414802	1.4528	0.173595	-0.616916
3832.42	0.347878	-0.124895	0.70191	-0.225671	0.43254	1.17267	0.123825	1.1193	0.385585	-0.702118
3843.86	0.226008	0.173191	0.647501	-0.43189	-0.0191758	0.801965	-0.334756	1.11557	0.409979	-0.679325
3855.31	0.173308	0.206637	0.52507	-0.358334	-0.009045	0.880895	0.408007	1.18972	0.110115	-0.679987
3866.76	0.0273731	0.144367	0.275772	-0.357416	0.230912	0.827759	0.713511	0.8255	0.285859	-0.393893
3878.21	-0.153184	0.0026952	0.104054	-0.463232	0.165358	0.616677	0.370905	0.828396	0.414749	-0.33203
3889.65	-0.0876553	-0.559907	0.240609	-0.271668	0.277771	0.338371	0.362475	1.17182	0.0814572	-0.528567
3901.1	0.0123039	-0.218684	0.236515	-0.632565	0.27905	-0.0666441	0.179573	1.20538	-0.0695952	0.0902905
3912.55	0.12035	0.0908704	0.0930524	-0.388889	0.424695	0.0221612	0.700252	1.32542	-0.130958	0.341306
3923.99	0.11048	-0.307799	0.386926	0.0547042	0.29315	-0.17948	0.964089	1.48402	-0.0876345	0.116239
3935.44	0.161657	-0.00444653	0.17789	-0.195955	0.233073	-0.424399	0.72922	1.18859	-0.296609	0.113983
3946.89	0.174542	-0.109173	-0.131347	0.323192	0.0222708	-0.363856	0.996409	1.15237	-0.433835	0.0809844
3958.33	0.00163843	-0.194616	0.461704	0.31926	-0.0748612	-0.413591	0.822159	1.41644	-0.234516	0.0688036
3969.78	-0.0126772	-0.0845533	0.480403	0.10659	0.0988409	-0.262206	0.201058	0.980116	-0.31141	-0.19372
3981.23	0.0244601	-0.348815	0.418697	0.753675	-0.0958614	-0.22247	0.221484	0.939008	-0.256699	-0.138328
3992.67	-0.0470892	0.237545	0.397129	0.307816	0.188514	-0.349857	0.767365	1.20728	-0.132507	-0.0927222
4004.12	-0.0156011	0.0944092	0.208639	-0.00802575	-0.348066	-0.350716	0.410673	0.906157	-0.0722912	-0.325269
4015.57	0.00918578	-0.171907	0.38567	0.323991	0.78555	-0.279493	0.110046	0.973678	0.0361635	-0.024553
4027.01	0.145993	0.210153	0.503058	0.0187771	1.97866	-0.518911	0.724677	1.03141	-0.0244663	0.0539535
4038.46	0.389049	-0.175574	0.611206	-0.12614	0.179789	-0.571133	0.54729	0.959618	-0.0785554	0.0457256
4049.91	0.222486	-0.255016	0.718989	-0.0742541	0.0984092	-0.341208	0.498258	1.05803	0.0586163	0.184562
4061.36	0.231684	-0.0541921	1.22405	-0.198133	0.223728	-0.428934	0.85249	1.02745	0.0599055	0.138074
4072.8	0.227739	0.100695	1.21626	-0.134434	-0.191279	-0.30096	0.777473	1.06106	-0.0477062	0.186672
4084.25	0.0269623	0.172022	0.798352	-0.187455	0.104749	-0.288557	0.692974	1.00607	0.0689158	0.140192
4095.7	0.216173	0.194978	0.739799	-0.559348	0.0969398	-0.427159	0.745513	0.963012	0.0607301	0.286083
4107.14	0.0824814	0.355129	0.528691	-0.645203	0.18347	-0.177995	1.09649	1.00713	0.15407	0.369615
4118.59	-0.0878905	0.280876	0.700269	-0.493028	-0.0844991	-0.2894	0.929812	1.01494	0.012509	0.284574
4130.04	-0.0697987	0.124642	0.70334	-0.493406	-0.0419394	-0.350195	0.406395	0.961611	-0.318071	0.291141
4141.48	-0.288941	0.148528	0.689807	-0.433211	0.116434	-0.0686133	0.529577	0.463571	0.166432	0.350012
4152.93	-0.232066	0.376187	0.726905	-0.32998	-0.0428004	-0.250956	1.03963	0.291051	0.373295	0.298537
4164.38	-0.117664	0.24986	0.706783	-0.263848	-0.122514	-0.379651	1.0957	0.712154	0.209108	0.00218229
4175.82	-0.145877	0.215841	1.05829	-0.18439	-0.172662	-0.169387	0.810638	0.71622	0.468426	0.232944
4187.27	-0.0820614	0.406638	0.776719	-0.0248791	-0.159086	-0.127441	0.673913	0.661941	0.460626	0.603312
4198.72	0.0809183	0.344814	0.935264	0.27963	-0.112512	-0.229117	1.2668	0.7865	0.406486	0.528693
4210.16	0.165737	0.295297	1.14219	0.160733	0.0538613	-0.35424	1.55459	0.85576	0.426675	0.513227
4221.61	0.10419	0.250325	0.376569	0.037379	-0.0336873	-0.375639	1.11754	1.04843	0.261755	0.600006
4233.06	0.236263	0.585322	0.656387	0.265289	0.0413559	-0.212872	1.56501	0.869715	0.467692	0.444239
4244.51	0.381754	0.872357	0.897205	0.219249	0.449359	-0.14907	1.35699	0.869106	0.720535	0.456522
4255.95	0.396018	0.781422	0.569707	0.125388	0.399219	-0.225015	1.16217	1.20071	0.606733	0.63301
4267.4	0.324693	0.819621	0.695054	-0.0352049	0.204365	-0.283313	1.64922	0.837414	0.57331	0.389519
4278.85	0.244299	0.901082	0.594102	0.0381369	0.226252	-0.156075	1.14129	0.552165	0.680901	0.372861
4290.29	0.356403	0.846935	0.436216	0.0228295	0.247268	-0.0533655	0.778883	0.800002	0.64397	0.395088
4301.74	0.358989	0.685445	0.052786	-0.285352	0.241141	-0.352416	1.05476	0.775465	0.646573	0.368334
4313.19	0.306495	0.559508	0.280938	0.0633934	0.380818	-0.233694	1.04631	0.724006	0.812951	0.72353
4324.63	0.248796	0.428138	0.801039	0.218927	0.283163	-0.0751443	0.901486	0.771059	0.728156	0.6077
4336.08	0.1634	0.562203	0.266692	0.162633	0.222635	-0.182038	1.48761	0.665899	0.546405	0.483189
4347.53	0.221492	0.851867	0.131378	0.294323	0.544558	-0.069949	1.48171	0.76253	0.596903	0.489741
4358.97	0.18039	0.538473	-0.00779921	0.170202	0.408726	-0.246556	1.03376	0.696356	0.897037	0.229589
4370.42	0.11296	0.445833	-0.263871	0.473269	0.469899	-0.371136	1.05638	0.586754	0.804243	0.428894
4381.87	0.217518	0.842369	-0.211269	0.623838	0.449056	-0.24445	0.826366	0.734788	0.214316	0.379727
4393.31	0.0899136	0.5403	-0.373975	0.147363	-0.031811	-0.0980374	1.00335	0.590777	0.333544	0.422584
4404.76	-0.126552	0.437085	-0.336991	-0.00783385	0.367472	-0.0142267	0.742447	0.660557	0.731528	0.729661
4416.21	0.112423	0.699097	-0.698295	0.0237953	0.539662	0.0473789	0.468233	0.771208	0.644116	0.405949
4427.66	0.128829	0.375411	-0.462504	-0.0794695	0.363233	0.191725	1.00329	0.767078	0.453954	0.484566
4439.1	-0.0786934	0.173438	0.0885198	-0.261129	0.308933	0.187713	0.892994	1.02457	0.530824	0.254085
4450.55	0.0623299	0.0442731	-0.109318	-0.36855	0.244456	0.204831	0.537641	1.00265	0.799036	0.12807
4462	0.0920659	-0.0219718	0.301028	-0.389718	0.261894	0.301707	0.826997	1.00068	0.625406	0.684043
4473.44	0.0803759	0.472185	0.645597	-0.490038	0.226492	0.206574	0.592015	1.00132	0.428162	0.438106
4484.89	0.112479	0.253089	0.682303	-0.448072	0.427591	-0.125765	-0.36183	1.15124	0.461106	0.413523
4496.34	0.0353164	-0.249261	0.790239	-0.411586	0.183903	-0.193391	-0.140077	1.18817	0.213608	0.482998
4507.78	0.115428	0.205594	0.817264	-0.452937	0.511194	-0.0127823	0.483613	0.946232	0.217502	0.193672
4519.23	0.226346	0.162955	0.783211	-0.573035	-0.132234	0.0241523	0.503243	1.02337	0.407953	0.393208
4530.68	0.234312	-0.0373835	0.264109	-0.708436	0.278813	-0.0153418	0.386781	1.01801	0.428318	0.465297
4542.12	0.332871	0.140369	0.103147	-0.531244	1.60169	-0.0123513	0.549334	1.47324	0.480153	0.386296
4553.57	0.401665	-0.0921421	-0.155868	-0.342064	-1.22144	0.0695703	0.821115	1.42679	0.544818	0.30454
4565.02	0.320735	0.000293238	-0.486274	-0.284149	-0.933321	-0.281241	0.832928	0.69432	0.607042	0.310917
4576.47	0.444475	0.16661	-0.518612	-0.183865	0.629449	-0.370521	1.3928	0.923587	0.493873	0.466547
4587.91	0.582001	0.156958	-0.88416	-0.120487	-0.411234	0.0873062	1.34823	1.194	0.610137	0.087402
4599.36	0.47742	0.0304426	-0.741797	-0.0838673	0.497175	-0.0166843	1.00569	1.1269	0.762009	-0.0485845
4610.8	0.447556	0.0328365	-0.730066	0.0816551	0.846156	-0.241047	1.07453	1.17587	0.695942	0.0513452
4622.25	0.521522	0.211677	-0.718158	0.095109	0.947654	-0.0484382	0.79577	1.11163	0.656187	-0.0759561
4633.7	0.635759	-0.0913682	-0.42562	0.0352064	1.03102	0.0279631	0.946507	0.995542	0.548068	-0.00937034
4645.14	0.51388	-0.0477921	-0.619542	0.225423	0.826706	-0.0326862	1.02704	1.03436	0.705666	-0.23289
4656.6	0.384269	0.150061	-0.524043	0.294399	1.14562	0.0407752	0.878022	1.07474	0.647375	-0.102755
4668.04	0.528339	-0.0754269	-0.534653	0.318532	1.13594	-0.0712925	0.880214	0.91947	0.54558	0.0876197
4679.49	0.510596	-0.0405303	-0.47255	0.424829	1.14081	0.195171	0.815681	0.898093	0.672584	-0.253515
4690.93	0.361652	-0.00863407	-0.408705	0.419756	0.753978	0.615016	0.607271	0.925506	0.421479	-0.143394
4702.38	0.293102	-0.0291434	-0.569986	0.364602	0.80374	0.437849	0.474699	0.778291	0.388119	-0.178668
4713.84	0.253796	0.115775	-0.049869	0.461239	0.837422	0.737631	0.601573	0.680922	0.393755	-0.208675
4725.26	0.218211	-0.12919	0.0900337	0.505654	0.688053	0.925001	0.656009	0.719619	0.389391	-0.0242952
4736.73	0.322411	-0.165762	0.323269	0.325349	1.16921	0.760858	0.600938	0.476771	0.521049	-0.00968678
4748.16	0.296129	0.0581647	0.628941	0.341651	0.872049	0.940533	0.297427	0.116129	0.379263	0.0819874
4759.62	0.164016	-0.131847	0.457112	0.261254	0.848003	0.849454	0.418222	0.14186	0.42378	0.000740351
4771.07	0.0315935	-0.16605	0.84879	0.0529566	1.12885	0.951977	0.520377	0.0198015	0.496182	-0.0564517
4782.49	-0.160137	0.0604699	0.766171	-0.0740716	0.714863	0.837054	0.221645	0.00833428	0.399734	-0.0475129
4793.99	0.128455	0.165347	0.678302	-0.184564	0.800277	0.293081	0.248073	0.22065	0.383018	-0.0548767
4805.37	-0.079258	0.0634925	0.976674	-0.113369	0.718572	0.181799	0.281678	0.21157	0.447058	-0.0417169
4816.88	-0.261164	0.121827	0.788811	-0.184299	0.254095	0.0616853	0.315286	0.342755	0.235601	-0.0060598
4828.29	0.0292792	0.270425	0.915231	-0.250314	0.25396	-0.0685468	0.0284037	0.368417	0.0648432	0.00800896
4839.72	-0.17217	0.242292	0.934236	-0.164416	0.461538	-0.184294	-0.15409	0.358756	0.303769	-0.00482865
4851.25	0.106869	0.342313	0.768126	-0.21299	0.327242	-0.538759	0.0385011	0.49921	0.334099	0.00390576
4862.55	0.107125	0.28555	0.681365	-0.102181	-0.206973	-0.509373	0.129231	0.387768	0.223056	-0.00491732
4874.19	0.00735468	0.0643485	0.452453	0.0353187	-0.479546	-0.389455	0.0361985	0.307982	0.0999559	0.0105878
4885.43	0.222085	0.176857	0.618088	-0.000219393	-0.544827	-0.593607	0.0265652	0.300663	0.110837	-0.0182154
4897.04	-0.0669153	0.206783	0.57317	0.080752	-0.359508	-0.35823	0.172996	0.0890711	0.204549	0.0278291
4908.49	0.124532	-0.0826765	0.262049	0.148902	-0.237079	-0.37727	-0.123958	0.203577	0.15787	-0.0404842
4919.75	0.184859	-0.0358879	0.346634	0.0321669	-0.0332732	-0.412343	-0.303869	0.246343	0.148141	-0.155494
4931.79	0.00201923	0.121525	0.348568	-0.0679135	0.403398	0.167663	-0.228987	0.166824	0.0415138	-0.00394515
4942.33	0.78559	-0.0147885	-0.24112	0.100283	-0.204001	0.0246663	-0.580472	1.16346	-0.0798888	-0.0132458
