# Supplementary material for: How spatial release from masking may fail to function in a highly directional auditory system
Source: eLife. 2017 Apr 25;6:e20731. doi: 10.7554/eLife.20731 (PMC5443663; doi:10.7554/eLife.20731)
Supplement: Figure 4—source data 6. — The target signal was presented at 76 dB SPL while the masker intensity was varied to achieve three SNRs (−6, 0, +6 dB). ‘X’ and ‘Y’ coordinates of virtual walking paths measured from the treadmill system. Data plotted in Figure 4C (right). DOI: http://dx.doi.org/10.7554/eLife.20731.015 [file elife-20731-fig4-data6.xlsx]

## Sheet: x_minus6sep
Fly1	Fly2	Fly3	Fly4	Fly5	Fly6	Fly7	Fly8	Fly9	Fly10	Fly11	Fly12	Fly13			AVG	SEM
-2.30776e-07	-1.21996e-08		-2.75288e-08		-3.08769e-07			-3.26782e-07	-3.46791e-07	6.34425e-07		-8.73483e-08			-8.82212e-08	1.07232e-07
4.7233e-07	4.99158e-08		7.58577e-08		5.9121e-07			6.94415e-07	8.82761e-07	-1.32634e-06		2.97271e-07			2.17177e-07	2.29305e-07
-9.34265e-07	-1.55167e-07		-1.94285e-07		-1.07697e-06			-1.43165e-06	-2.13887e-06	2.68671e-06		-8.57072e-07			-5.12695e-07	4.80889e-07
1.77525e-06	4.28117e-07		4.72816e-07		1.8301e-06			2.85679e-06	4.98451e-06	-5.25389e-06		2.25888e-06			1.16907e-06	9.89518e-07
-3.20939e-06	-1.10131e-06		-1.10906e-06		-2.77934e-06			-5.49431e-06	-1.12432e-05	9.85844e-06		-5.61228e-06			-2.5863e-06	2.00095e-06
5.33744e-06	2.63825e-06		2.50593e-06		3.22863e-06			1.00037e-05	2.46101e-05	-1.73275e-05		1.33894e-05			5.54824e-06	3.9664e-06
-7.67082e-06	-6.16482e-06		-5.40607e-06		-8.47523e-07			-1.69087e-05	-5.2109e-05	2.76527e-05		-3.06994e-05			-1.15192e-05	7.73944e-06
1.02613e-05	1.57077e-05		1.20602e-05		-8.37018e-06			2.83682e-05	0.00010779	-4.37151e-05		6.69569e-05			2.36325e-05	1.53878e-05
-1.39916e-06	-2.75313e-05		-2.65431e-05		5.39535e-05			-3.19278e-05	-0.000221137	3.53659e-05		-0.000151548			-4.63459e-05	3.12009e-05
-0.000114161	1.66085e-05		2.49563e-05		-0.000251714			-7.57177e-05	0.000385715	0.000233487		0.000342568			7.02177e-05	7.60352e-05
-8.46908e-05	-0.00048939		-0.000100771		-3.26851e-05			-0.000278424	-0.000621366	0.000506011		-0.000313421			-0.000176842	0.000114477
0.00138991	0.000789828		0.00110438		0.000187107			0.0015921	0.00296447	-0.00352185		0.00120428			0.000713778	0.000628819
0.0203421	0.0160641		0.00405848		0.0293159			0.0253379	-0.000216538	-0.0566366		-0.0152669			0.0028748	0.00939814
0.0388707	0.0706681		-0.00174849		0.0791782			0.054819	-0.036212	-0.126854		-0.0533887			0.00316667	0.0238898
0.0491906	0.134476		-0.0307489		0.122601			0.0830814	-0.0657795	-0.205226		-0.0326037			0.00687379	0.0379038
0.0467781	0.196477		-0.0883192		0.14495			0.064515	-0.110221	-0.283591		0.00705924			-0.00279386	0.0513816
0.0354829	0.252451		-0.161877		0.153143			-0.0514053	-0.150065	-0.348307		-0.00252324			-0.0341376	0.0632218
0.0248267	0.300585		-0.223816		0.147768			-0.203767	-0.183584	-0.401297		-0.0134091			-0.0690868	0.0757141
0.0197497	0.326769		-0.270746		0.149116			-0.40256	-0.217923	-0.413314		-0.0118196			-0.102591	0.0889998
0.0222999	0.337474		-0.298446		0.159394			-0.604903	-0.245224	-0.397286		-0.0132041			-0.129987	0.10372
0.0157046	0.342986		-0.296375		0.17167			-0.812988	-0.273894	-0.369349		-0.00889089			-0.153892	0.120725
0.00292058	0.341231		-0.286633		0.18258			-1.02128	-0.301087	-0.359337		-0.00575976			-0.180921	0.139892
-0.0329649	0.337807		-0.281556		0.193455			-1.22549	-0.331191	-0.359772		-0.00633798			-0.213257	0.159815
-0.0724776	0.333426		-0.285479		0.206212			-1.43292	-0.368688	-0.359618		-0.00620769			-0.248219	0.181095
-0.112989	0.330734		-0.293905		0.210419			-1.64107	-0.422861	-0.359801		-0.00604131			-0.286939	0.202976
-0.148812	0.337569		-0.305608		0.211145			-1.8563	-0.486664	-0.359728		-0.00656305			-0.32687	0.22648
-0.187033	0.34327		-0.318205		0.212575			-2.06558	-0.550712	-0.359759		-0.000629751			-0.365759	0.24971
-0.232742	0.3455		-0.327698		0.217981			-2.2854	-0.620267	-0.359745		-0.00425612			-0.408329	0.274059
-0.267227	0.35017		-0.335296		0.219663			-2.50502	-0.69347	-0.359751		-0.00667003			-0.4497	0.298737
-0.309916	0.351625		-0.344655		0.221116			-2.72804	-0.774417	-0.359748		-0.00606997			-0.493763	0.323874
-0.348043	0.345935		-0.354603		0.2218			-2.98645	-0.867005	-0.359749		-0.00610243			-0.544277	0.352899
-0.370436	0.342709		-0.364813		0.222484			-3.25355	-0.957505	-0.359749		0.00391265			-0.592118	0.383473
-0.384185	0.33505		-0.383215		0.222622			-3.52815	-1.04682	-0.359749		0.0109964			-0.641681	0.414719
-0.392388	0.338468		-0.384511		0.223573			-3.81119	-1.12999	-0.359749		0.0296509			-0.685767	0.447861
-0.404737	0.339176		-0.369659		0.224789			-4.10563	-1.22997	-0.359749		0.0452707			-0.732563	0.482607
-0.420103	0.337711		-0.359336		0.222158			-4.39248	-1.33371	-0.359749		0.0501502			-0.78192	0.516127
-0.433521	0.35876		-0.357338		0.222628			-4.67751	-1.43675	-0.359749		0.0492593			-0.829277	0.550144
-0.448211	0.420299		-0.372636		0.225331			-4.92717	-1.53032	-0.359749		0.0508797			-0.867698	0.58139
-0.464902	0.516541		-0.404557		0.235665			-5.16601	-1.64498	-0.359749		0.0562122			-0.903972	0.613227
-0.48895	0.649518		-0.468694		0.258545			-5.36466	-1.77536	-0.359749		0.0634996			-0.935731	0.64251
-0.51498	0.781377		-0.558064		0.278935			-5.52963	-1.90932	-0.359749		0.0683011			-0.967891	0.668175
-0.539285	0.907646		-0.679995		0.299974			-5.67744	-2.01952	-0.359749		0.0712491			-0.99964	0.691433
-0.55655	1.04371		-0.800294		0.312559			-5.81243	-2.16058	-0.359749		0.0772285			-1.03201	0.714972
-0.566977	1.15187		-0.915393		0.317199			-5.9068	-2.30915	-0.359749		0.0809401			-1.06351	0.733516
-0.577621	1.24584		-1.02938		0.330288			-6.03122	-2.46363	-0.359749		0.0805003			-1.10062	0.755346
-0.582976	1.31807		-1.14376		0.342746			-6.21249	-2.6096	-0.359749		0.080823			-1.14587	0.782139
-0.573044	1.38912		-1.24415		0.35154			-6.39414	-2.74802	-0.359749		0.080378			-1.18726	0.808932
-0.558943	1.48187		-1.31856		0.350609			-6.58892	-2.89522	-0.359749		0.0811663			-1.22597	0.838348
-0.560117	1.56546		-1.36937		0.350951			-6.76722	-3.03251	-0.359749		0.0799456			-1.26158	0.865175
-0.585786	1.65435		-1.42412		0.348771			-6.94626	-3.15169	-0.359749		0.0774898			-1.29838	0.891429
-0.623448	1.73567		-1.49079		0.333722			-7.13914	-3.24499	-0.359749		0.0600742			-1.34108	0.917012
-0.652258	1.80074		-1.55587		0.296979			-7.3172	-3.34369	-0.359749		0.025047			-1.38825	0.939527
-0.666271	1.85596		-1.64304		0.242761			-7.49064	-3.46155	-0.359749		0.0620486			-1.43256	0.963249
-0.673397	1.90538		-1.7365		0.173645			-7.66866	-3.53575	-0.359749		0.0858575			-1.47615	0.985161
-0.696087	1.9498		-1.81708		0.0660916			-7.83455	-3.62818	-0.359749		0.0854515			-1.52929	1.00446
-0.75015	1.99723		-1.89614		-0.0522292			-7.93313	-3.71756	-0.359749		0.0806222			-1.57889	1.01651
-0.818146	2.06326		-1.96587		-0.156794			-7.88993	-3.7868	-0.359749		0.0805534			-1.60418	1.0154
-0.872636	2.15042		-2.022		-0.256533			-7.82213	-3.87436	-0.359749		0.0804932			-1.62206	1.01437
-0.901706	2.24057		-2.07903		-0.293338			-7.80701	-3.94047	-0.359749		0.0799308			-1.6326	1.01989
-0.92651	2.34077		-2.15515		-0.305083			-7.80957	-3.94816	-0.359749		0.0871579			-1.63454	1.02675
-0.946299	2.43874		-2.23515		-0.310106			-7.82866	-3.99441	-0.359749		0.141123			-1.63681	1.03812
-0.966129	2.55448		-2.30147		-0.330694			-7.89902	-4.05883	-0.359749		0.168211			-1.64915	1.0551
-0.993717	2.66106		-2.39346		-0.372286			-8.05057	-4.11502	-0.359749		0.169548			-1.68177	1.07801
-1.0203	2.73191		-2.50665		-0.435972			-8.23453	-4.18957	-0.359749		0.185115			-1.72872	1.10262
-1.03555	2.79619		-2.59616		-0.507991			-8.44915	-4.26811	-0.359749		0.205606			-1.77686	1.12974
-1.03821	2.8494		-2.67782		-0.601996			-8.64276	-4.33455	-0.359749		0.203414			-1.82528	1.15287
-1.03095	2.90958		-2.7387		-0.711922			-8.82481	-4.3822	-0.359749		0.197499			-1.86766	1.17433
-1.03511	2.96302		-2.80943		-0.811057			-8.99799	-4.42766	-0.359749		0.198934			-1.90988	1.19495
-1.07403	3.01952		-2.89147		-0.902912			-9.19479	-4.46595	-0.359749		0.198269			-1.95889	1.21764
-1.13071	3.10542		-2.9891		-0.998096			-9.41998	-4.51083	-0.359749		0.204542			-2.01231	1.24539
-1.19796	3.19524		-3.08547		-1.08686			-9.65291	-4.58055	-0.359749		0.205373			-2.07036	1.27483
-1.26464	3.29987		-3.16644		-1.14594			-9.86411	-4.66316	-0.359749		0.236252			-2.11599	1.30469
-1.33704	3.40422		-3.24712		-1.23149			-10.0786	-4.78908	-0.359749		0.275659			-2.1704	1.33613
-1.40275	3.49971		-3.32783		-1.32466			-10.2711	-4.92747	-0.359749		0.298758			-2.22688	1.3649
-1.44853	3.57123		-3.42251		-1.44284			-10.4439	-5.05641	-0.359749		0.311317			-2.28642	1.38984
-1.48703	3.62325		-3.52923		-1.56458			-10.5971	-5.17791	-0.359749		0.304432			-2.34849	1.41113
-1.51886	3.66455		-3.62795		-1.66645			-10.7479	-5.29135	-0.359749		0.254907			-2.41159	1.43016
-1.55349	3.70635		-3.71336		-1.76146			-10.9059	-5.39131	-0.359749		0.198104			-2.47261	1.44917
-1.5805	3.75521		-3.79014		-1.84737			-11.0715	-5.47807	-0.359749		0.209001			-2.52039	1.47098
-1.58262	3.81059		-3.86137		-1.86669			-11.243	-5.54765	-0.359749		0.237676			-2.55161	1.49445
-1.58291	3.89098		-3.93704		-1.88043			-11.4171	-5.58637	-0.359749		0.235778			-2.5796	1.51808
-1.60416	3.98247		-3.99849		-1.90793			-11.6043	-5.60177	-0.359749		0.237213			-2.60709	1.54258
-1.62791	4.04532		-4.03761		-1.90325			-11.7814	-5.62196	-0.359749		0.234381			-2.63152	1.56414
-1.64523	4.0881		-4.0801		-1.91128			-11.9663	-5.65666	-0.359749		0.232014			-2.6624	1.58558
-1.67367	4.14718		-4.1377		-1.92688			-12.1438	-5.6708	-0.359749		0.235614			-2.69122	1.60706
-1.70056	4.21251		-4.20518		-1.94691			-12.3161	-5.68874	-0.359749		0.237683			-2.72089	1.62871
-1.73523	4.28805		-4.27491		-1.97723			-12.4646	-5.72027	-0.359749		0.242356			-2.7502	1.64919
-1.77161	4.36331		-4.34655		-2.0153			-12.4816	-5.76377	-0.359749		0.241846			-2.76668	1.65757
-1.8	4.43184		-4.41218		-2.0556			-12.4233	-5.85081	-0.359749		0.241243			-2.77857	1.65983
-1.83251	4.50298		-4.48229		-2.10586			-12.4185	-5.94458	-0.359749		0.244447			-2.79951	1.66766
-1.86405	4.55682		-4.56447		-2.14817			-12.4153	-6.03304	-0.359749		0.259189			-2.82109	1.67499
-1.8933	4.60993		-4.64445		-2.14778			-12.4082	-6.13357	-0.359749		0.298818			-2.83479	1.68342
-1.9145	4.63331		-4.71246		-2.14655			-12.4035	-6.23627	-0.359749		0.318745			-2.85263	1.68945
-1.93191	4.65273		-4.78967		-2.1524			-12.3983	-6.30099	-0.359749		0.311315			-2.87113	1.69338
-1.94972	4.68267		-4.85354		-2.15565			-12.3989	-6.34992	-0.359749		0.310234			-2.88433	1.69808
-1.97087	4.72398		-4.88671		-2.15995			-12.3974	-6.39447	-0.359749		0.310052			-2.89189	1.70271
-1.98204	4.76893		-4.90413		-2.17343			-12.4112	-6.46689	-0.359749		0.310133			-2.90229	1.70965
-1.98111	4.83188		-4.93508		-2.19775			-12.4991	-6.55943	-0.359749		0.310121			-2.92378	1.72539
-1.98731	4.89811		-5.00749		-2.19315			-12.6321	-6.62946	-0.359749		0.310163			-2.95013	1.7455
-1.98821	4.94524		-5.08264		-2.18433			-12.7828	-6.65302	-0.359749		0.310026			-2.97443	1.76438
-1.99651	4.96269		-5.12643		-2.18742			-12.9084	-6.66499	-0.359749		0.310353			-2.9963	1.77787
-2.00894	4.97084		-5.13258		-2.18781			-13.0231	-6.67085	-0.359749		0.309326			-3.01286	1.78878
-2.01735	4.9801		-5.1255		-2.18535			-13.1226	-6.67069	-0.359749		0.31294			-3.02352	1.7982
-2.0152	4.97623		-5.12813		-2.18552			-13.2576	-6.66599	-0.359749		0.317448			-3.03982	1.81004
-2.01087	4.963		-5.15274		-2.19689			-13.4453	-6.66766	-0.359749		0.350844			-3.06492	1.82743
-2.01497	4.96293		-5.17812		-2.22133			-13.5537	-6.66876	-0.359749		0.367941			-3.08322	1.838
-2.01776	4.96774		-5.19423		-2.25448			-13.5196	-6.66762	-0.359749		0.360714			-3.08563	1.83503
-2.01761	4.96828		-5.1968		-2.26125			-13.5064	-6.66755	-0.359749		0.35955			-3.0852	1.83383

## Sheet: y_minus6sep
Fly1	Fly2	Fly3	Fly4	Fly5	Fly6	Fly7	Fly8	Fly9	Fly10	Fly11	Fly12	Fly13			AVG	SEM
-2.1838e-07	-1.95741e-07		-2.99907e-08		-2.37665e-07			-1.03924e-06	-3.25995e-07	-3.95141e-07		-8.81842e-07			-4.15499e-07	1.18345e-07
3.81729e-07	4.00854e-07		-6.42973e-08		4.13106e-07			1.87404e-06	6.40756e-07	8.48623e-07		1.82086e-06			7.89459e-07	2.34132e-07
-6.06833e-07	-7.93548e-07		4.12605e-07		-6.50675e-07			-3.13275e-06	-1.20688e-06	-1.76904e-06		-3.63787e-06			-1.42312e-06	4.54669e-07
8.06992e-07	1.50946e-06		-1.45188e-06		8.47151e-07			4.6087e-06	2.15351e-06	3.57439e-06		6.99799e-06			2.38079e-06	8.73198e-07
-6.19121e-07	-2.72699e-06		4.24596e-06		-5.8265e-07			-5.05389e-06	-3.56396e-06	-6.97818e-06		-1.28599e-05			-3.51734e-06	1.6881e-06
-1.24267e-06	4.55319e-06		-1.13869e-05		-1.55468e-06			-2.43634e-07	4.92818e-06	1.29353e-05		2.19091e-05			3.73724e-06	3.3672e-06
7.9962e-06	-6.73242e-06		2.84184e-05		9.13511e-06			2.42304e-05	-4.39998e-06	-2.2522e-05		-3.30409e-05			3.85593e-07	7.13202e-06
-2.37441e-05	8.02731e-06		-6.49003e-05		-2.83988e-05			-9.02817e-05	4.26385e-06	3.99469e-05		4.8656e-05			-1.33039e-05	1.61161e-05
8.89809e-05	1.90269e-06		0.000165394		9.87555e-05			0.000330759	3.90222e-05	-4.71523e-05		-2.26516e-05			8.18762e-05	4.08365e-05
-0.000341208	-4.86e-05		-0.000427766		-0.000329542			-0.00119896	-0.000373871	-8.62464e-05		-0.000409102			-0.000401911	0.000117526
-0.00030664	-9.27798e-06		5.07493e-05		-7.54592e-05			0.000209585	-0.000890632	-0.000575631		-0.000593043			-0.000273794	0.000127421
0.00016763	-0.000483067		-0.00139158		-0.000766209			-0.000875373	0.00341261	0.00201974		0.00543309			0.000939605	0.000813889
0.0439226	0.007369		0.0329343		0.0339233			0.115609	0.0746562	0.0380285		0.0841113			0.0538193	0.0116201
0.157707	0.034244		0.13954		0.12537			0.333165	0.23909	0.110564		0.185321			0.165625	0.0299499
0.314786	0.142117		0.297253		0.262475			0.558243	0.434458	0.218317		0.26092			0.311071	0.0433789
0.505094	0.29778		0.505651		0.426791			0.754523	0.64091	0.355828		0.287303			0.471735	0.0550011
0.718595	0.472118		0.745671		0.59096			0.883231	0.846096	0.519616		0.281077			0.632171	0.0681266
0.94154	0.660199		0.996958		0.724464			0.969479	1.03824	0.677739		0.268477			0.784637	0.0859249
1.16601	0.838766		1.23099		0.806048			1.01693	1.22598	0.760553		0.270517			0.914474	0.107411
1.38282	0.99708		1.38611		0.849129			1.04983	1.40427	0.730303		0.273661			1.00915	0.13117
1.55353	1.12116		1.4644		0.876824			1.07759	1.56872	0.677118		0.272322			1.07646	0.152668
1.67254	1.20401		1.51583		0.88849			1.11739	1.72648	0.658926		0.277482			1.13264	0.169575
1.75009	1.24719		1.57393		0.893839			1.16639	1.88076	0.669462		0.298868			1.18507	0.182343
1.805	1.26998		1.63309		0.899927			1.23107	2.03895	0.678142		0.322514			1.23484	0.194608
1.87692	1.29287		1.68352		0.896285			1.30299	2.19676	0.672667		0.33877			1.2826	0.209392
1.96258	1.31781		1.74		0.887879			1.34618	2.36033	0.673585		0.35573			1.33051	0.225578
2.05201	1.34251		1.81346		0.887515			1.41639	2.52007	0.673099		0.368551			1.3842	0.242576
2.14212	1.36764		1.89822		0.884436			1.5078	2.68139	0.673307		0.360174			1.43938	0.26175
2.21956	1.39445		1.98979		0.884502			1.60374	2.83779	0.673237		0.350155			1.49415	0.280404
2.28881	1.41984		2.0845		0.883934			1.70358	2.9932	0.673259		0.354531			1.55021	0.298045
2.35322	1.44817		2.18593		0.883843			1.81822	3.14496	0.673254		0.370121			1.60971	0.315016
2.39239	1.47405		2.29574		0.883655			1.93287	3.28804	0.673254		0.39416			1.66677	0.330427
2.41762	1.49168		2.37996		0.884038			2.05097	3.43137	0.673255		0.427825			1.71959	0.344501
2.43886	1.53592		2.38665		0.884431			2.17842	3.57201	0.673254		0.455843			1.76567	0.35658
2.46805	1.58252		2.36891		0.883471			2.31456	3.73174	0.673254		0.478258			1.8126	0.370948
2.50047	1.6213		2.36053		0.88338			2.45132	3.89844	0.673254		0.489548			1.85978	0.387563
2.52836	1.68177		2.37249		0.883137			2.59451	4.06757	0.673254		0.488572			1.91121	0.405839
2.55724	1.76147		2.40818		0.890816			2.73146	4.23767	0.673254		0.492124			1.96903	0.424129
2.58812	1.86931		2.46131		0.914855			2.84812	4.40877	0.673254		0.515106			2.03486	0.440603
2.619	2.01479		2.55452		0.941067			2.98226	4.57688	0.673254		0.532251			2.11175	0.458291
2.64618	2.15678		2.70178		0.981822			3.13141	4.74118	0.673254		0.545606			2.19725	0.476923
2.67747	2.31442		2.89947		1.03259			3.2775	4.87844	0.673254		0.556689			2.28873	0.49436
2.71564	2.4683		3.10582		1.07573			3.43711	5.03911	0.673254		0.568209			2.3854	0.515353
2.74999	2.62162		3.31694		1.10339			3.53829	5.22077	0.673254		0.577837			2.47526	0.537523
2.77589	2.80047		3.52433		1.15285			3.64347	5.39225	0.673254		0.572692			2.5669	0.559461
2.81307	2.97057		3.70029		1.19914			3.79836	5.53798	0.673254		0.571362			2.658	0.580426
2.86332	3.14986		3.847		1.24561			3.95738	5.67742	0.673254		0.571859			2.74821	0.600582
2.93213	3.33022		3.96926		1.29831			4.11986	5.83195	0.673254		0.571072			2.84076	0.621486
3.00973	3.4976		4.08997		1.34872			4.27166	5.99238	0.673254		0.5769			2.93253	0.642202
3.07947	3.66884		4.22038		1.40305			4.40541	6.12752	0.673254		0.5837			3.0202	0.660673
3.14165	3.84499		4.3379		1.46338			4.55576	6.23819	0.673254		0.604217			3.10742	0.676742
3.20835	4.02882		4.42863		1.54247			4.70006	6.35985	0.673254		0.634855			3.19704	0.69171
3.2904	4.21043		4.51855		1.6489			4.84112	6.49593	0.673254		0.659985			3.29232	0.707085
3.39335	4.39103		4.62302		1.79424			4.97691	6.60982	0.673254		0.711107			3.39659	0.718367
3.52018	4.57376		4.71771		1.96414			5.09817	6.73528	0.673254		0.71085			3.49917	0.732316
3.63848	4.77121		4.83846		2.12978			5.13197	6.86811	0.673254		0.705722			3.59462	0.745766
3.72044	4.94874		4.97529		2.29871			5.08427	6.98894	0.673254		0.712707			3.67529	0.755543
3.81204	5.12617		5.10658		2.50603			5.04683	7.09225	0.673254		0.709521			3.75908	0.764781
3.92216	5.29166		5.24643		2.7223			5.04043	7.15303	0.673254		0.719349			3.84608	0.771774
4.04257	5.47397		5.3972		2.94136			5.03239	7.19566	0.673254		0.738124			3.93681	0.778689
4.14676	5.68249		5.54151		3.16947			5.06981	7.25544	0.673254		0.808935			4.04346	0.785744
4.22849	5.88211		5.67596		3.40418			5.20842	7.31726	0.673254		0.850928			4.15508	0.796962
4.2891	6.0925		5.81441		3.64937			5.41415	7.37181	0.673254		0.847462			4.26901	0.813311
4.35737	6.33869		5.91069		3.9065			5.6542	7.41777	0.673254		0.876976			4.39193	0.828709
4.43777	6.57807		5.97367		4.14615			5.90596	7.48776	0.673254		0.892061			4.51184	0.846868
4.53724	6.82015		6.04784		4.37173			6.16378	7.58979	0.673254		0.880255			4.6355	0.870243
4.67789	7.08545		6.11546		4.60167			6.42804	7.7104	0.673254		0.889037			4.77265	0.894858
4.8485	7.32682		6.20415		4.82964			6.68391	7.83533	0.673254		0.888695			4.91129	0.920242
5.01931	7.5748		6.31387		5.05542			6.89714	7.9714	0.673254		0.901051			5.05078	0.94524
5.19843	7.8551		6.4305		5.27781			7.06991	8.12377	0.673254		0.90897			5.19222	0.971977
5.37379	8.13626		6.54333		5.48523			7.21543	8.28495	0.673254		0.914646			5.32836	0.998733
5.53548	8.42148		6.6424		5.63902			7.36418	8.43723	0.673254		0.947481			5.45757	1.02331
5.68486	8.72479		6.72825		5.77411			7.51667	8.5761	0.673254		0.990681			5.58359	1.04746
5.83824	9.02428		6.81781		5.91259			7.69224	8.70339	0.673254		1.00911			5.70886	1.07368
6.01048	9.32576		6.89257		6.08736			7.88743	8.82885	0.673254		1.02559			5.84141	1.10085
6.17636	9.60619		6.94992		6.28512			8.08764	8.94495	0.673254		1.05388			5.97216	1.12604
6.32748	9.88647		7.01253		6.50483			8.30504	9.08258	0.673254		1.11484			6.11338	1.15087
6.45617	10.1616		7.09071		6.73544			8.51782	9.23145	0.673254		1.15493			6.25267	1.17768
6.55748	10.4293		7.18667		6.96836			8.72768	9.37532	0.673254		1.16737			6.38568	1.20612
6.64629	10.6665		7.29871		7.10565			8.91063	9.50628	0.673254		1.21212			6.50243	1.22893
6.75037	10.9168		7.40945		7.18274			9.10989	9.59632	0.673254		1.27211			6.61387	1.25002
6.87604	11.1234		7.48387		7.20254			9.30527	9.65345	0.673254		1.27239			6.69878	1.27089
7.00729	11.2881		7.54794		7.20557			9.50498	9.71977	0.673254		1.25314			6.775	1.29131
7.1308	11.4313		7.62604		7.26358			9.65465	9.79394	0.673254		1.25519			6.8536	1.30826
7.23674	11.5948		7.7052		7.35752			9.80149	9.8456	0.673254		1.25694			6.93394	1.32566
7.3292	11.7453		7.79633		7.45829			9.96861	9.91165	0.673254		1.27444			7.01963	1.34263
7.4149	11.884		7.89928		7.55018			10.1396	9.99381	0.673254		1.29033			7.10566	1.35983
7.50981	12.0254		8.01116		7.60395			10.1777	10.1049	0.673254		1.28887			7.17439	1.37461
7.61598	12.1519		8.14813		7.64783			10.1194	10.2556	0.673254		1.28952			7.23771	1.38687
7.72906	12.2712		8.30729		7.70594			10.1179	10.4432	0.673254		1.31569			7.32045	1.40079
7.84898	12.4001		8.48865		7.75633			10.1162	10.6718	0.673254		1.36643			7.41521	1.4156
7.96551	12.5412		8.65305		7.7472			10.1118	10.9225	0.673254		1.42782			7.50528	1.43112
8.08777	12.6876		8.79796		7.7364			10.1101	11.1647	0.673254		1.4731			7.59136	1.44805
8.21124	12.8271		8.94734		7.74839			10.1034	11.3617	0.673254		1.45942			7.66648	1.46711
8.32783	12.9632		9.06433		7.78379			10.098	11.577	0.673254		1.46293			7.74379	1.48541
8.44074	13.0899		9.15903		7.85014			10.1038	11.7796	0.673254		1.47505			7.82144	1.50227
8.53341	13.1988		9.28716		7.92625			10.1975	11.9807	0.673254		1.4727			7.90872	1.52164
8.59482	13.3105		9.41146		7.94332			10.3642	12.1704	0.673254		1.47979			7.99346	1.54162
8.65881	13.4256		9.52583		7.92518			10.5693	12.3174	0.673254		1.47925			8.07184	1.56148
8.73026	13.518		9.62854		7.92018			10.7785	12.35	0.673254		1.48586			8.13558	1.57486
8.78843	13.5719		9.70914		7.92142			10.9519	12.3374	0.673254		1.4931			8.1808	1.58305
8.82243	13.6009		9.76256		7.9221			11.088	12.3288	0.673254		1.49217			8.21127	1.58919
8.83176	13.6486		9.79027		7.92006			11.172	12.3202	0.673254		1.49254			8.23108	1.59432
8.82893	13.6993		9.7974		7.9323			11.2925	12.3146	0.673254		1.49637			8.25432	1.6002
8.82657	13.7371		9.79551		7.97409			11.4264	12.3154	0.673254		1.53534			8.28546	1.6036
8.83035	13.7663		9.79498		8.03806			11.5042	12.3172	0.673254		1.55185			8.30952	1.60641
8.83554	13.7899		9.79889		8.11245			11.5037	12.3154	0.673254		1.53616			8.32065	1.60855
8.836	13.7944		9.80004		8.12759			11.4988	12.3151	0.673254		1.5327			8.32224	1.60885

## Sheet: x_equalsep
Fly1	Fly2	Fly3	Fly4	Fly5	Fly6	Fly7	Fly8	Fly9	Fly10	Fly11	Fly12	Fly13			AVG	SEM
-1.87009e-07	-4.358e-05	-0.00105081	-5.74016e-06		-7.2803e-08		-9.44502e-08	0.00162993	9.3918e-08	-4.172e-07		6.58052e-08			5.29188e-05	0.00020371
3.71124e-07	1.51606e-06	-0.00102218	0.000245001		1.17516e-07		2.20889e-07	0.00146202	-1.59956e-07	8.5475e-07		-4.31325e-08			6.87725e-05	0.000188417
-7.07752e-07	-4.0494e-07	-0.00104362	4.50541e-05		-1.6102e-07		-4.9961e-07	0.00175678	2.43189e-07	-1.69261e-06		-1.22612e-07			7.54868e-05	0.000213969
1.28323e-06	-5.14905e-07	-0.00103192	-1.00167e-05		1.38471e-07		1.09609e-06	0.00159373	-2.90596e-07	3.2211e-06		7.19515e-07			5.57441e-05	0.000199273
-2.16703e-06	1.71529e-06	-0.00103368	4.97421e-07		1.5838e-07		-2.33502e-06	0.00199089	1.06845e-07	-5.83535e-06		-2.48138e-06			9.46868e-05	0.000234344
3.21079e-06	-1.91696e-06	-0.00103562	3.51392e-05		-1.32973e-06		4.83625e-06	0.00170372	9.20614e-07	9.72051e-06		7.27837e-06			7.25964e-05	0.000208803
-3.59126e-06	7.62754e-06	-0.00102638	3.85695e-05		4.89695e-06		-9.67678e-06	0.00169155	-4.37067e-06	-1.40716e-05		-1.92521e-05			6.65307e-05	0.000207439
1.68772e-06	-4.25131e-05	-0.0010539	3.95396e-05		-1.41071e-05		1.83857e-05	0.00177287	1.34096e-05	1.94881e-05		4.52656e-05			8.00119e-05	0.000215929
1.58887e-05	-0.000239593	-0.000965897	8.84617e-05		3.99805e-05		-3.51195e-05	0.00190111	-4.18249e-05	-1.57512e-06		-0.000119987			6.41442e-05	0.000225844
-0.000102852	-8.84729e-05	-0.00131113	0.000151856		-0.000113385		6.58976e-05	0.00183587	0.000129138	-0.000214186		0.000336657			6.89394e-05	0.000242132
-1.42775e-05	-0.000285683	-0.00115377	5.75128e-05		0.000142952		-2.77991e-05	0.000857962	-8.5077e-05	-0.000284314		-1.6133e-05			-8.08625e-05	0.000156225
5.39172e-05	0.00102461	-8.4576e-05	0.00146537		-0.000361582		0.00010511	0.00322663	0.000346643	0.00240082		0.000634487			0.000881143	0.000369424
0.01316	0.0241554	0.0322058	0.00714652		0.00590858		-0.00277222	-0.00333101	-0.00955668	0.0410984		-0.0284889			0.00795259	0.00654746
0.0332162	0.0674635	0.0965123	0.00474913		0.012345		-0.0188972	-0.038059	-0.0271084	0.0878787		-0.105153			0.0112948	0.0197733
0.0549481	0.109034	0.157292	-0.00218945		0.0125211		-0.0461242	-0.0926774	-0.0379376	0.11405		-0.195127			0.00737898	0.033748
0.0674518	0.149867	0.215171	-0.0158156		0.0101826		-0.0893326	-0.157602	-0.0358537	0.130085		-0.290054			-0.00159002	0.0481658
0.0683742	0.19483	0.238078	-0.0291306		0.00914844		-0.137393	-0.217932	-0.0368044	0.118602		-0.377131			-0.0169358	0.0597586
0.0527967	0.227544	0.253256	-0.0476497		0.00924703		-0.186702	-0.270689	-0.0431188	0.0794298		-0.447714			-0.03736	0.0686252
0.0272826	0.242461	0.265484	-0.0741894		0.01018		-0.217967	-0.321938	-0.0531789	0.0383735		-0.501971			-0.0585463	0.0751867
-0.00429628	0.243332	0.282018	-0.0866529		0.0124726		-0.237395	-0.369145	-0.0666222	-0.00389706		-0.554284			-0.0784469	0.0809113
-0.0310131	0.243711	0.308874	-0.0919151		0.0121969		-0.233632	-0.431279	-0.0864698	-0.041403		-0.599272			-0.0950202	0.0871124
-0.0550766	0.25387	0.31246	-0.10678		0.0132778		-0.21681	-0.498851	-0.115437	-0.0586021		-0.615953			-0.10879	0.0913088
-0.0917037	0.270179	0.32006	-0.127792		0.0157267		-0.195467	-0.568214	-0.144622	-0.0574916		-0.62753			-0.120686	0.0962556
-0.131073	0.282229	0.30711	-0.148123		0.0153624		-0.188198	-0.640418	-0.191102	-0.0551967		-0.641831			-0.139124	0.100931
-0.171444	0.291953	0.282045	-0.160953		0.0159947		-0.190737	-0.712987	-0.24397	-0.0628954		-0.657402			-0.161039	0.105482
-0.210021	0.292814	0.249187	-0.180006		0.0190821		-0.192804	-0.784028	-0.31126	-0.0640644		-0.668045			-0.184915	0.109642
-0.251727	0.284251	0.218348	-0.200547		0.0160441		-0.194188	-0.855331	-0.393065	-0.0620371		-0.667236			-0.210549	0.11362
-0.300187	0.276067	0.189158	-0.228895		0.0167655		-0.189929	-0.928703	-0.456342	-0.0602232		-0.667047			-0.234934	0.118239
-0.337766	0.266468	0.163551	-0.248233		0.0189623		-0.185145	-0.997649	-0.493659	-0.060526		-0.668394			-0.254239	0.122526
-0.37993	0.277464	0.145242	-0.255082		0.0193951		-0.185359	-1.06351	-0.533939	-0.0605688		-0.66902			-0.270531	0.128139
-0.429219	0.297004	0.129972	-0.259059		0.0210338		-0.186617	-1.13738	-0.5771	-0.0597346		-0.668557			-0.286966	0.135213
-0.466647	0.306751	0.109674	-0.270441		0.0186998		-0.187862	-1.20881	-0.61589	-0.0586162		-0.66815			-0.304129	0.141347
-0.510299	0.311152	0.0981243	-0.30242		0.0199772		-0.186077	-1.26244	-0.657152	-0.056105		-0.668309			-0.321355	0.146668
-0.543102	0.311348	0.0948334	-0.346533		0.0202393		-0.180923	-1.30895	-0.67944	-0.0623122		-0.673415			-0.336825	0.150995
-0.574561	0.302051	0.087042	-0.402602		0.0197181		-0.177185	-1.35644	-0.729249	-0.0760014		-0.698444			-0.360567	0.155922
-0.614073	0.262763	0.0785126	-0.468712		0.0179952		-0.176071	-1.42054	-0.802782	-0.0880146		-0.738327			-0.394924	0.161895
-0.656555	0.213572	0.0731308	-0.549493		0.0175573		-0.178803	-1.49144	-0.881073	-0.0913753		-0.796696			-0.434118	0.169162
-0.701209	0.149904	0.0770358	-0.627126		0.0182184		-0.188037	-1.56008	-0.964942	-0.0944648		-0.865032			-0.475573	0.176684
-0.741187	0.0991414	0.0877055	-0.703232		0.0300523		-0.201287	-1.63506	-1.01773	-0.112254		-0.904341			-0.509819	0.183887
-0.774395	0.0695145	0.112349	-0.777771		0.0743281		-0.214376	-1.72277	-1.0618	-0.142634		-0.945077			-0.538264	0.19394
-0.802893	0.0513015	0.137179	-0.854297		0.149201		-0.239795	-1.82225	-1.10012	-0.160712		-1.00666			-0.564905	0.20695
-0.820389	0.043515	0.138517	-0.92979		0.21521		-0.268497	-1.92148	-1.13278	-0.149256		-1.07114			-0.58961	0.219736
-0.814843	0.0313154	0.136002	-0.980768		0.282757		-0.300457	-2.01107	-1.16065	-0.136062		-1.14287			-0.609665	0.231297
-0.800448	0.0132749	0.133036	-1.01686		0.350408		-0.320989	-2.09063	-1.19117	-0.116397		-1.23422			-0.627399	0.242867
-0.804123	0.00105376	0.127772	-1.06205		0.393264		-0.351472	-2.16375	-1.22533	-0.0920937		-1.33678			-0.651352	0.253974
-0.817979	-0.00154438	0.110539	-1.12148		0.417674		-0.396617	-2.23952	-1.27428	-0.0732004		-1.44916			-0.684557	0.265189
-0.832944	0.00221666	0.107179	-1.1959		0.397302		-0.447527	-2.32494	-1.33217	-0.0653558		-1.57766			-0.726979	0.276524
-0.840334	0.0120062	0.101089	-1.29038		0.333475		-0.491367	-2.41075	-1.3904	-0.0670025		-1.69429			-0.773796	0.286098
-0.85616	0.0213432	0.0947649	-1.37082		0.239058		-0.542261	-2.47878	-1.45256	-0.0598452		-1.76773			-0.817298	0.292038
-0.865183	0.0303804	0.0967417	-1.43856		0.145738		-0.582152	-2.55514	-1.51471	-0.05232		-1.83598			-0.857118	0.29886
-0.865379	0.034586	0.123504	-1.47988		0.0439732		-0.634622	-2.63562	-1.57551	-0.0543071		-1.91042			-0.895368	0.305952
-0.870812	0.042667	0.147029	-1.49985		-0.0526666		-0.696338	-2.70527	-1.63792	-0.0642906		-1.99723			-0.933468	0.312688
-0.881474	0.0438454	0.16076	-1.52077		-0.106153		-0.764085	-2.77407	-1.70412	-0.0794762		-2.09348			-0.971902	0.320678
-0.884782	0.035877	0.183574	-1.5629		-0.173381		-0.826104	-2.84997	-1.79008	-0.112234		-2.18691			-1.01669	0.329279
-0.865326	0.0289173	0.193502	-1.63313		-0.248572		-0.891935	-2.93638	-1.89078	-0.149186		-2.29518			-1.06881	0.339534
-0.850342	0.0160237	0.188541	-1.73981		-0.335864		-0.946658	-3.04066	-1.99328	-0.193426		-2.42324			-1.13187	0.351374
-0.851976	0.0141847	0.200856	-1.8461		-0.434211		-0.993768	-3.15149	-2.07727	-0.238423		-2.55486			-1.1933	0.364263
-0.866191	0.0266203	0.230486	-1.90848		-0.504484		-1.04429	-3.24412	-2.12089	-0.27034		-2.64778			-1.23495	0.37486
-0.888535	0.0470456	0.254005	-1.92512		-0.578108		-1.0891	-3.32288	-2.16502	-0.297422		-2.70248			-1.26676	0.382339
-0.922129	0.0509425	0.261204	-1.93277		-0.657305		-1.13549	-3.40552	-2.2191	-0.310655		-2.77173			-1.30426	0.389705
-0.969259	0.0561437	0.267822	-1.95384		-0.754895		-1.1815	-3.50174	-2.27181	-0.322761		-2.85496			-1.34868	0.398421
-1.01973	0.0707761	0.267552	-2.0015		-0.869538		-1.22329	-3.58584	-2.34236	-0.3147		-2.95441			-1.3973	0.408559
-1.07105	0.0852721	0.280101	-2.05876		-0.988351		-1.26702	-3.661	-2.42863	-0.293759		-3.06527			-1.44685	0.42036
-1.11715	0.0789622	0.284368	-2.11919		-1.1074		-1.32468	-3.71424	-2.54234	-0.27567		-3.18954			-1.50269	0.431209
-1.16049	0.0654451	0.283582	-2.17494		-1.23345		-1.3876	-3.75571	-2.68325	-0.254052		-3.30485			-1.56053	0.441561
-1.20428	0.0520341	0.284557	-2.22421		-1.38308		-1.44881	-3.80025	-2.83737	-0.24865		-3.42673			-1.62368	0.452482
-1.25261	0.0372306	0.282389	-2.25954		-1.52199		-1.50056	-3.85139	-2.99645	-0.266501		-3.51629			-1.68457	0.461799
-1.29691	0.0185976	0.278955	-2.2938		-1.63201		-1.52849	-3.92226	-3.14743	-0.294561		-3.55249			-1.73704	0.469583
-1.34141	-0.0135137	0.2862	-2.32494		-1.72175		-1.54933	-3.98769	-3.27826	-0.313926		-3.58835			-1.7833	0.476954
-1.38346	-0.0546207	0.278114	-2.35964		-1.83418		-1.57435	-4.06306	-3.4003	-0.327313		-3.66179			-1.83806	0.485417
-1.44144	-0.0774669	0.248163	-2.40647		-1.95448		-1.59039	-4.11674	-3.4973	-0.359009		-3.73782			-1.89329	0.491245
-1.49908	-0.100001	0.221069	-2.44696		-2.05734		-1.60023	-4.16323	-3.58187	-0.413874		-3.82186			-1.94634	0.49604
-1.53149	-0.116608	0.168971	-2.46535		-2.15126		-1.61301	-4.24772	-3.65203	-0.497623		-3.92026			-2.00264	0.500957
-1.56697	-0.125639	0.109903	-2.47344		-2.25319		-1.64299	-4.33217	-3.72388	-0.600489		-4.02261			-2.06315	0.5054
-1.60581	-0.11997	0.0592876	-2.50183		-2.35434		-1.69595	-4.42672	-3.81611	-0.721665		-4.11567			-2.12988	0.511307
-1.66165	-0.124837	0.0182802	-2.54963		-2.41939		-1.75398	-4.54994	-3.9161	-0.851361		-4.1906			-2.19992	0.517845
-1.72542	-0.126768	-0.00759756	-2.59244		-2.43241		-1.78487	-4.68159	-4.0244	-0.988628		-4.24077			-2.26049	0.524858
-1.77257	-0.11536	-0.0298333	-2.60811		-2.44276		-1.81989	-4.82166	-4.12018	-1.10945		-4.29215			-2.3132	0.533401
-1.81311	-0.0978656	-0.0336236	-2.63277		-2.45799		-1.83753	-4.92544	-4.1912	-1.18108		-4.32829			-2.34989	0.54143
-1.83792	-0.0745418	-0.0252977	-2.62983		-2.48567		-1.80993	-5.02697	-4.23428	-1.15102		-4.32582			-2.36013	0.550653
-1.83354	-0.0683756	-0.0312334	-2.59039		-2.52653		-1.79813	-5.12386	-4.25268	-1.10629		-4.33184			-2.36629	0.558062
-1.82423	-0.0617218	-0.0537983	-2.56804		-2.56212		-1.79911	-5.17794	-4.25593	-1.1078		-4.33979			-2.37505	0.560824
-1.83068	-0.0597557	-0.0736318	-2.58227		-2.60931		-1.79889	-5.20726	-4.24384	-1.12372		-4.3465			-2.38759	0.561228
-1.8331	-0.0462702	-0.0896573	-2.61313		-2.65829		-1.80663	-5.22907	-4.23564	-1.12625		-4.34791			-2.39859	0.562271
-1.83194	-0.0285837	-0.102806	-2.6467		-2.696		-1.82911	-5.25667	-4.23015	-1.12363		-4.36229			-2.41079	0.564568
-1.83555	-0.0181954	-0.122982	-2.68387		-2.74824		-1.85261	-5.28929	-4.21724	-1.12176		-4.39784			-2.42876	0.56711
-1.83527	-0.0097072	-0.152673	-2.70623		-2.81227		-1.87511	-5.29906	-4.21511	-1.11803		-4.43406			-2.44575	0.568441
-1.82263	0.0016942	-0.178496	-2.70694		-2.87143		-1.89071	-5.32493	-4.23828	-1.10702		-4.47301			-2.46117	0.572311
-1.81053	0.0222679	-0.199936	-2.71658		-2.93196		-1.88463	-5.35722	-4.27013	-1.09623		-4.52653			-2.47715	0.578398
-1.80235	0.0514636	-0.20409	-2.72946		-2.98731		-1.87673	-5.39973	-4.29587	-1.08604		-4.58			-2.49101	0.585994
-1.79993	0.0731265	-0.199	-2.72912		-3.00903		-1.87014	-5.4722	-4.30495	-1.07769		-4.60454			-2.49935	0.593089
-1.8047	0.09131	-0.208366	-2.73525		-3.02299		-1.86631	-5.56104	-4.30861	-1.07603		-4.61877			-2.51107	0.599416
-1.80636	0.0919798	-0.227428	-2.75632		-3.01738		-1.86921	-5.66318	-4.31801	-1.07711		-4.63408			-2.52771	0.605323
-1.80546	0.0873866	-0.235838	-2.78135		-2.99827		-1.87958	-5.75549	-4.32777	-1.07838		-4.64988			-2.54246	0.610825
-1.80093	0.0880041	-0.24206	-2.80634		-2.98931		-1.89011	-5.81026	-4.34586	-1.07981		-4.65949			-2.55361	0.614696
-1.79528	0.107979	-0.249358	-2.81927		-2.9836		-1.88132	-5.84852	-4.38263	-1.08695		-4.66588			-2.56048	0.619051
-1.82097	0.132915	-0.251908	-2.8233		-3.01405		-1.8737	-5.90306	-4.43453	-1.10796		-4.67773			-2.57743	0.624961
-1.84789	0.152679	-0.262587	-2.82573		-3.07788		-1.87198	-5.95938	-4.49287	-1.14248		-4.68814			-2.60163	0.630422
-1.86615	0.166755	-0.277206	-2.81869		-3.12514		-1.87451	-6.00302	-4.5461	-1.18627		-4.70325			-2.62336	0.634416
-1.88147	0.195596	-0.278437	-2.82067		-3.15509		-1.88676	-6.08052	-4.598	-1.22864		-4.71963			-2.64536	0.641576
-1.88467	0.243141	-0.261848	-2.84601		-3.17855		-1.90545	-6.15544	-4.6312	-1.26291		-4.72136			-2.66043	0.649428
-1.9027	0.303777	-0.264755	-2.87651		-3.207		-1.92427	-6.19771	-4.64076	-1.26208		-4.71619			-2.66882	0.654914
-1.9163	0.352809	-0.279819	-2.89967		-3.23283		-1.93205	-6.23743	-4.64996	-1.25742		-4.71499			-2.67677	0.659598
-1.91872	0.388244	-0.281773	-2.92007		-3.25169		-1.93134	-6.27379	-4.6552	-1.25917		-4.71498			-2.68185	0.663884
-1.92059	0.428124	-0.277175	-2.92987		-3.27012		-1.92894	-6.30376	-4.65609	-1.26033		-4.71439			-2.68331	0.668132
-1.92134	0.453511	-0.260174	-2.92706		-3.28233		-1.92775	-6.32468	-4.65826	-1.25908		-4.71255			-2.68197	0.671542
-1.9113	0.463935	-0.241415	-2.92882		-3.28046		-1.93025	-6.3473	-4.66437	-1.25914		-4.71751			-2.68166	0.674649
-1.90925	0.465391	-0.237437	-2.93053		-3.27952		-1.93111	-6.3522	-4.66547	-1.25922		-4.71934			-2.68187	0.675288

## Sheet: y_equalsep
Fly1	Fly2	Fly3	Fly4	Fly5	Fly6	Fly7	Fly8	Fly9	Fly10	Fly11	Fly12	Fly13			AVG	SEM
-9.03119e-08	-2.16758e-07	-4.03668e-07	-1.51598e-07		8.99153e-08		-2.17866e-07	-4.43457e-07	-7.40637e-07	-2.70665e-07		1.10946e-08			-2.43395e-07	7.62152e-08
1.79355e-07	4.32481e-07	8.34709e-07	2.95816e-07		-1.76462e-07		2.57473e-07	8.12079e-07	1.46036e-06	5.52952e-07		-7.49922e-08			4.57377e-07	1.53205e-07
-3.42055e-07	-8.2998e-07	-1.67031e-06	-5.52146e-07		3.31949e-07		-8.14798e-08	-1.38947e-06	-2.76265e-06	-1.09108e-06		2.67154e-07			-8.12006e-07	3.0274e-07
6.21349e-07	1.51865e-06	3.22014e-06	9.73041e-07		-5.90264e-07		-8.46552e-07	2.13302e-06	4.95537e-06	2.06864e-06		-7.85119e-07			1.32683e-06	5.91326e-07
-1.05919e-06	-2.60378e-06	-5.9322e-06	-1.57554e-06		9.66969e-07		3.96557e-06	-2.61743e-06	-8.23771e-06	-3.73557e-06		2.09205e-06			-1.87368e-06	1.15552e-06
1.52129e-06	3.90479e-06	1.01192e-05	2.08282e-06		-1.36948e-06		-1.30581e-05	1.07446e-06	1.17828e-05	6.10433e-06		-5.30011e-06			1.6862e-06	2.29395e-06
-1.59081e-06	-4.6203e-06	-1.54938e-05	-1.64763e-06		1.25806e-06		3.67411e-05	7.39199e-06	-1.18501e-05	-8.5988e-06		1.26169e-05			1.42066e-06	4.74476e-06
3.24788e-06	5.13277e-06	2.36098e-05	5.27102e-07		8.58276e-07		-9.07081e-05	-3.15806e-05	3.3458e-06	1.44608e-05		-2.72732e-05			-9.83795e-06	1.0444e-05
1.06659e-05	2.0271e-05	-5.49192e-06	2.37982e-05		-7.35915e-06		0.000247054	0.000128258	7.59494e-05	5.97828e-06		7.17958e-05			5.7092e-05	2.51716e-05
-0.000132527	-0.000170439	-0.000184227	-0.000155606		4.27198e-05		-0.000681665	-0.00047252	-0.000503178	-0.000231594		-0.000185715			-0.000267475	6.8347e-05
-0.000489496	-0.000468003	-0.000539755	-0.000420575		-0.000168128		0.00019943	-6.51456e-05	-0.000350346	-0.00075546		-0.000168927			-0.00032264	8.69332e-05
0.00136471	0.000571498	0.00140075	0.000497549		-0.000207154		-0.00209106	-0.000781739	0.00146301	0.0026646		-0.000775448			0.000410671	0.000441972
0.0320512	0.0351446	0.0441217	0.0309672		-0.00233901		0.0523453	0.0499641	0.0724546	0.0553848		0.0195073			0.0389602	0.00660703
0.124291	0.129895	0.139335	0.12397		0.00143318		0.198611	0.164453	0.196054	0.185004		0.0977779			0.136082	0.0184502
0.265504	0.258034	0.286944	0.281618		0.0104102		0.405495	0.315802	0.332285	0.369931		0.219762			0.274579	0.0340929
0.422036	0.396609	0.468013	0.477973		0.0154147		0.649489	0.49072	0.483443	0.573364		0.359414			0.433648	0.0534298
0.586248	0.538153	0.654563	0.689994		0.0114267		0.868974	0.658907	0.641538	0.782012		0.513671			0.594549	0.0729791
0.764999	0.672747	0.843931	0.901119		0.00928043		1.03308	0.788624	0.804917	1.01038		0.669389			0.749846	0.0910101
0.931677	0.815948	1.04181	1.09102		0.00963342		1.11677	0.884505	0.970083	1.23291		0.788757			0.888311	0.107051
1.07351	0.953827	1.19899	1.22156		0.00942433		1.14505	0.94712	1.13281	1.44519		0.892973			1.00204	0.121497
1.20706	1.07642	1.29349	1.29852		0.00962805		1.16655	1.00176	1.30143	1.62943		0.983665			1.0968	0.134419
1.34796	1.19456	1.37016	1.36428		0.00836784		1.19506	1.03881	1.48283	1.77707		1.04958			1.18287	0.147443
1.49775	1.31256	1.42859	1.45388		0.00924055		1.22153	1.06826	1.67663	1.80481		1.09179			1.2565	0.157286
1.64427	1.42979	1.49377	1.55283		0.00953831		1.25808	1.09368	1.88776	1.76858		1.11241			1.32507	0.168007
1.79778	1.55173	1.56321	1.64753		0.00957409		1.29354	1.12048	2.10067	1.76351		1.12948			1.39775	0.182212
1.94463	1.67594	1.6383	1.76208		0.00936944		1.3178	1.14229	2.28544	1.76537		1.15951			1.47007	0.197031
2.0933	1.79364	1.71579	1.88202		0.00961562		1.32117	1.1606	2.41928	1.76733		1.18297			1.53457	0.210931
2.21881	1.90408	1.79746	1.99178		0.00873836		1.30861	1.18481	2.48783	1.76704		1.18498			1.58541	0.222199
2.32844	2.00471	1.88045	2.08533		0.00653252		1.30127	1.22103	2.52185	1.76528		1.1738			1.62887	0.231686
2.4538	2.07048	1.95537	2.16556		0.00553192		1.30442	1.26556	2.5548	1.76542		1.16899			1.67099	0.240656
2.56861	2.10994	2.02476	2.23101		0.00515687		1.31236	1.31366	2.58158	1.76539		1.17204			1.70845	0.248137
2.67828	2.1299	2.09192	2.29497		0.00553578		1.31863	1.35654	2.61589	1.76556		1.1716			1.74288	0.255778
2.77966	2.14276	2.1586	2.36022		0.00643786		1.32238	1.39185	2.6623	1.78325		1.17066			1.77781	0.263865
2.86549	2.15112	2.23575	2.43119		0.00499134		1.32087	1.40983	2.69466	1.80659		1.1827			1.81032	0.271439
2.95746	2.16514	2.31081	2.52084		0.00346401		1.31961	1.43414	2.75708	1.83366		1.21943			1.85216	0.280332
3.06374	2.22272	2.39534	2.64129		0.0052451		1.31976	1.47219	2.83344	1.848		1.2779			1.90796	0.291042
3.17569	2.3413	2.49838	2.7779		0.00530876		1.32894	1.52113	2.91819	1.84235		1.34979			1.9759	0.3036
3.28841	2.52032	2.62162	2.92306		0.00659514		1.34523	1.57589	3.03202	1.83923		1.42152			2.05739	0.318748
3.3752	2.71247	2.76286	3.08899		0.00961281		1.36692	1.65262	3.15531	1.86587		1.47784			2.14677	0.334327
3.45443	2.92404	2.93589	3.27058		0.028246		1.39633	1.75756	3.29737	1.9061		1.53973			2.25103	0.350304
3.53892	3.15237	3.13678	3.47637		0.0645494		1.43631	1.8744	3.45372	1.94265		1.61753			2.36936	0.367367
3.60742	3.39928	3.33793	3.69391		0.107536		1.48748	2.00478	3.61033	1.95806		1.72008			2.49268	0.384292
3.67435	3.67309	3.54636	3.91723		0.181617		1.54341	2.14357	3.76399	1.97527		1.8415			2.62604	0.400325
3.77275	3.95693	3.73885	4.1462		0.286818		1.5959	2.29518	3.89168	2.0078		1.99351			2.76856	0.414449
3.8715	4.24014	3.92419	4.36278		0.438868		1.70236	2.47315	4.00567	2.05359		2.16458			2.92368	0.422642
3.97479	4.5397	4.0983	4.55133		0.635066		1.83246	2.6553	4.11339	2.10884		2.34736			3.08565	0.426811
4.08971	4.84867	4.24615	4.70849		0.867348		1.97744	2.84758	4.2317	2.17215		2.53801			3.25273	0.427799
4.21054	5.17022	4.39984	4.83969		1.13389		2.13989	3.04238	4.36203	2.24532		2.72296			3.42668	0.427189
4.32543	5.49514	4.55424	4.97796		1.43226		2.32783	3.24442	4.52366	2.32501		2.88321			3.60892	0.426391
4.40064	5.80895	4.71998	5.14883		1.75238		2.51212	3.47219	4.69638	2.40449		3.05626			3.79722	0.425901
4.43949	6.13588	4.89114	5.34421		2.08005		2.70352	3.70575	4.85598	2.49323		3.23609			3.98853	0.426811
4.47671	6.46245	5.06803	5.53659		2.42927		2.89893	3.94664	5.01771	2.59709		3.4135			4.18469	0.427939
4.52509	6.79288	5.25679	5.74263		2.71526		3.08162	4.19805	5.17421	2.71213		3.59678			4.37954	0.434419
4.58932	7.12281	5.44544	5.97208		3.04667		3.25482	4.45677	5.3309	2.84847		3.777			4.58443	0.44073
4.66398	7.44185	5.63436	6.17658		3.40712		3.40117	4.73139	5.49939	3.00646		3.98312			4.79454	0.445514
4.75412	7.75511	5.82199	6.34188		3.73458		3.53961	5.0097	5.66142	3.17734		4.2017			4.99975	0.450412
4.86342	8.05104	5.99285	6.47422		4.07388		3.69735	5.30301	5.79753	3.35442		4.42173			5.20295	0.452149
4.9977	8.33642	6.14587	6.59676		4.38967		3.85553	5.61161	5.91901	3.56166		4.59845			5.40127	0.453568
5.15977	8.61729	6.30773	6.73623		4.6902		4.02317	5.90525	6.05635	3.79679		4.71054			5.60033	0.456411
5.33671	8.88366	6.48012	6.87608		4.99598		4.197	6.20077	6.20898	4.03683		4.82049			5.80366	0.458937
5.51776	9.14614	6.65529	7.01814		5.27449		4.36722	6.5011	6.35906	4.26581		4.95055			6.00556	0.462812
5.70711	9.40126	6.8338	7.15916		5.56093		4.53321	6.80856	6.50874	4.50436		5.10628			6.21234	0.465891
5.87877	9.65511	7.02731	7.29448		5.85574		4.70206	7.12522	6.65968	4.76175		5.27459			6.42347	0.468787
6.03681	9.90646	7.21562	7.4402		6.14566		4.87092	7.43738	6.8336	5.03233		5.47557			6.63946	0.471323
6.2122	10.1441	7.37809	7.59519		6.43833		5.04278	7.67899	7.03539	5.3079		5.69774			6.85307	0.47087
6.41249	10.3804	7.51811	7.7599		6.73734		5.21477	7.81252	7.24188	5.54386		5.93837			7.05597	0.469151
6.63771	10.599	7.67074	7.93346		7.04536		5.3736	7.94857	7.47094	5.70114		6.14075			7.25212	0.470974
6.88416	10.8212	7.84747	8.09941		7.36413		5.54103	8.12815	7.70828	5.77277		6.26858			7.44352	0.479021
7.12884	11.0458	8.03712	8.22859		7.66693		5.71218	8.27858	7.96593	5.78184		6.3995			7.62453	0.48973
7.35276	11.2661	8.24171	8.3077		7.99307		5.86063	8.45695	8.22733	5.77477		6.57447			7.80555	0.502027
7.55136	11.4819	8.47662	8.36401		8.28639		5.96607	8.63719	8.46164	5.81588		6.7276			7.97686	0.51539
7.72225	11.7005	8.70736	8.43107		8.57972		6.08084	8.84281	8.67131	5.92471		6.86178			8.15223	0.527127
7.884	11.9347	8.93168	8.52693		8.90807		6.21768	9.08794	8.90341	6.06018		6.97667			8.34313	0.540316
8.05486	12.1796	9.15658	8.63653		9.23838		6.36256	9.31519	9.1497	6.18758		7.12146			8.54025	0.553971
8.25042	12.4315	9.36476	8.79441		9.58244		6.53797	9.52124	9.39909	6.33246		7.25964			8.74739	0.566182
8.45935	12.6983	9.57419	8.98298		9.90308		6.73799	9.72224	9.64509	6.4945		7.39922			8.96169	0.577303
8.67691	12.974	9.76302	9.19348		10.1891		6.94226	9.9255	9.93794	6.67508		7.54259			9.18198	0.58783
8.86083	13.2621	9.89021	9.40453		10.4765		7.19279	10.1542	10.2469	6.87517		7.71406			9.40773	0.596102
8.99013	13.558	9.9745	9.559		10.7673		7.40289	10.3593	10.5462	7.04253		7.85912			9.6059	0.609302
9.03932	13.8087	10.0698	9.67838		11.0294		7.54258	10.597	10.8156	7.0812		7.96175			9.76237	0.630402
9.04651	14.0924	10.1814	9.78947		11.2999		7.65353	10.859	11.0103	7.04074		8.03427			9.90076	0.660065
9.06183	14.3828	10.3089	9.89729		11.587		7.73295	11.0482	11.165	7.01892		8.04311			10.0246	0.691369
9.07118	14.6607	10.4423	10.018		11.875		7.80214	11.2259	11.3138	7.0131		8.05391			10.1476	0.721474
9.0691	14.9195	10.5871	10.1613		12.1788		7.88306	11.4116	11.4539	7.01812		8.06393			10.2746	0.750251
9.06615	15.1616	10.739	10.3286		12.4572		7.98725	11.579	11.5681	7.02304		8.0817			10.3992	0.775729
9.07251	15.3889	10.9003	10.521		12.677		8.08439	11.705	11.6676	7.0239		8.11853			10.5159	0.797505
9.09534	15.5952	11.0896	10.737		12.897		8.17385	11.8271	11.7851	7.02648		8.19111			10.6418	0.817193
9.1222	15.7811	11.2778	10.9517		13.1294		8.26694	12.011	11.9135	7.05676		8.30763			10.7818	0.834317
9.14663	15.9517	11.4663	11.1336		13.3502		8.35087	12.2172	12.0392	7.10582		8.44614			10.9208	0.849288
9.18391	16.1092	11.6427	11.2523		13.5405		8.43751	12.407	12.1423	7.17119		8.53849			11.0425	0.862069
9.24429	16.2633	11.8153	11.3515		13.6845		8.52981	12.6352	12.2438	7.24501		8.59951			11.1612	0.873718
9.31739	16.4163	11.9912	11.4601		13.8169		8.62519	12.8912	12.384	7.32703		8.65989			11.2889	0.885443
9.38442	16.5581	12.1557	11.6038		13.9341		8.73299	13.1387	12.5412	7.41444		8.71603			11.4179	0.895834
9.46111	16.6994	12.3215	11.7734		14.0553		8.82445	13.3545	12.6937	7.49839		8.75781			11.5439	0.906799
9.57371	16.8229	12.494	11.9613		14.1718		8.88841	13.5158	12.8062	7.5737		8.78409			11.6592	0.915981
9.70907	16.9583	12.669	12.169		14.3019		8.94674	13.6473	12.8932	7.60081		8.82588			11.7721	0.927062
9.85201	17.0866	12.8311	12.3752		14.4596		9.03119	13.799	12.9995	7.59176		8.88809			11.8914	0.939362
10.0145	17.2281	12.9953	12.5817		14.5917		9.1404	13.9538	13.118	7.61174		8.96973			12.0205	0.948688
10.2004	17.3849	13.1667	12.7598		14.7004		9.25831	14.0774	13.2522	7.65858		9.06121			12.152	0.955222
10.3808	17.5617	13.3068	12.9025		14.8201		9.36365	14.2145	13.3783	7.71814		9.09524			12.2742	0.964961
10.5355	17.7366	13.4279	13.0205		14.9195		9.42167	14.3318	13.4942	7.76171		9.09702			12.3746	0.977306
10.6721	17.8851	13.5311	13.1223		14.9689		9.4493	14.4381	13.6101	7.76426		9.09025			12.4532	0.990028
10.7963	17.997	13.6173	13.2089		14.9798		9.46134	14.6079	13.7268	7.76135		9.08077			12.5237	1.0019
10.8802	18.0717	13.7069	13.2811		14.994		9.46129	14.8082	13.8251	7.76285		9.08284			12.5874	1.01277
10.9211	18.1441	13.785	13.3476		15.0159		9.45119	14.9944	13.895	7.76305		9.084			12.6401	1.02428
10.9639	18.2097	13.8618	13.4062		15.0303		9.44135	15.1512	13.9464	7.76308		9.08862			12.6863	1.0341
11.0335	18.2495	13.9469	13.4762		15.0214		9.43713	15.2959	13.9994	7.76307		9.10988			12.7333	1.04054
11.0487	18.2551	13.9652	13.4916		15.0182		9.43679	15.3234	14.0108	7.76306		9.11481			12.7428	1.04161

## Sheet: x_plus6sep
Fly1	Fly2	Fly3	Fly4	Fly5	Fly6	Fly7	Fly8	Fly9	Fly10	Fly11	Fly12	Fly13			AVG	SEM
-1.79629e-07	-1.5241e-07	-4.17278e-07	-1.94403e-07		-1.12606e-07		-6.60555e-08	-5.23487e-05	4.1014e-06	-1.7228e-07		-1.42494e-07			-4.96845e-06	5.28172e-06
3.68007e-07	3.33042e-07	8.91328e-07	3.54732e-07		1.26211e-07		1.53049e-07	0.000151655	-9.89434e-06	3.39013e-07		3.3703e-07			1.44664e-05	1.52774e-05
-7.28744e-07	-7.06634e-07	-1.8477e-06	-6.03769e-07		-1.30448e-08		-3.43309e-07	-0.000693168	5.91533e-05	-6.39705e-07		-7.69676e-07			-6.39667e-05	7.0164e-05
1.38687e-06	1.45503e-06	3.70982e-06	9.17911e-07		-5.29756e-07		7.47244e-07	-0.00326238	1.37547e-05	1.14309e-06		1.70381e-06			-0.000323809	0.00032651
-2.51115e-06	-2.90392e-06	-7.18692e-06	-1.09932e-06		2.30737e-06		-1.58001e-06	-0.00303457	-5.7763e-06	-1.89131e-06		-3.66692e-06			-0.000305887	0.000303188
4.18399e-06	5.54384e-06	1.32115e-05	3.60673e-07		-7.38514e-06		3.24656e-06	-0.00314485	4.28124e-06	2.68508e-06		7.65073e-06			-0.000311108	0.000314865
-6.09928e-06	-9.98944e-06	-2.26987e-05	3.54544e-06		2.05796e-05		-6.40979e-06	-0.00310542	-3.12289e-06	-2.51854e-06		-1.5337e-05			-0.000314747	0.000310096
8.22392e-06	1.83558e-05	3.87776e-05	-1.49543e-05		-5.15609e-05		1.20969e-05	-0.00311075	-4.56458e-07	3.03219e-07		3.06534e-05			-0.000306932	0.000311637
3.75778e-07	-2.74187e-05	-4.51879e-05	5.57002e-05		0.000132952		-2.35637e-05	-0.00243154	1.89871e-05	1.49991e-05		-5.9859e-05			-0.000236456	0.000244531
-8.1185e-05	-1.91344e-05	-7.94583e-05	-0.000202702		-0.000347887		3.77263e-05	-0.00023211	-0.000134317	-0.000130027		6.57892e-05			-0.00011233	3.99691e-05
-0.000117818	-0.00017524	-0.000416556	9.8282e-05		0.000375724		2.25301e-06	-0.000834288	-5.21238e-06	1.90175e-05		-0.000161806			-0.000121564	0.000102403
0.000602443	0.0012509	0.00175612	-0.000172166		-0.00112052		0.000293161	-0.0020154	0.000925929	0.00119455		0.00157791			0.000429294	0.000385512
0.0156461	0.013005	0.0322286	0.0178687		0.0179004		-0.0013834	0.0120224	0.0172693	0.0167403		0.00576204			0.0147059	0.00276446
0.0389313	0.0223902	0.0791405	0.0451388		0.0472313		-0.0156387	0.0342446	0.0323572	0.0238794		-0.00799859			0.0299676	0.00860644
0.0582247	0.0193674	0.120597	0.0641159		0.0502584		-0.0414552	0.0454871	0.0291702	0.00761776		-0.0377844			0.0315599	0.015315
0.0613435	0.0129072	0.135538	0.0692285		0.0580648		-0.0729055	0.0462952	0.0182393	-0.0364795		-0.0956257			0.0196606	0.0223271
0.0525512	0.0118545	0.139677	0.0613418		0.0654897		-0.0880611	0.0395033	0.00334038	-0.09889		-0.172545			0.00142613	0.0296874
0.033766	0.0211618	0.130631	0.0410765		0.0738264		-0.100605	0.0340104	-0.00804774	-0.150444		-0.270079			-0.0194704	0.0378473
-0.00161066	0.0268948	0.120039	0.0212446		0.0927551		-0.102127	0.0431854	-0.0149949	-0.231943		-0.375748			-0.0422304	0.0487465
-0.0359586	0.0245702	0.117439	0.000886598		0.109901		-0.0919203	0.0464514	-0.018411	-0.296829		-0.408236			-0.0552106	0.0540571
-0.0737181	0.0181635	0.108325	-0.0368937		0.138569		-0.0843701	0.0458293	-0.0244556	-0.333621		-0.408718			-0.065089	0.056161
-0.113793	0.0223007	0.09124	-0.0667912		0.141966		-0.0839355	0.0562805	-0.0322563	-0.359414		-0.404953			-0.0749356	0.057218
-0.148613	0.0332217	0.0846876	-0.0800514		0.145456		-0.0810255	0.0871667	-0.0396321	-0.382887		-0.409851			-0.0791527	0.060147
-0.191433	0.0428017	0.0874042	-0.095202		0.140597		-0.0774311	0.131595	-0.0399738	-0.400285		-0.429183			-0.083111	0.0645679
-0.239857	0.0490017	0.0933116	-0.104603		0.144577		-0.0759827	0.170859	-0.0394344	-0.417723		-0.443689			-0.0863539	0.0694252
-0.305957	0.0506127	0.103519	-0.129731		0.160099		-0.0745345	0.22919	-0.0441443	-0.439507		-0.453105			-0.0903558	0.0764643
-0.368496	0.0501411	0.102577	-0.161151		0.171929		-0.0723611	0.324576	-0.0520764	-0.456802		-0.453988			-0.0915652	0.084891
-0.422972	0.0498454	0.0774923	-0.182689		0.175315		-0.0650328	0.396575	-0.0599216	-0.46204		-0.447733			-0.094116	0.0907968
-0.457364	0.0409338	0.0368093	-0.207226		0.179512		-0.0616557	0.458136	-0.0736735	-0.480369		-0.451931			-0.101683	0.0964998
-0.471601	0.0349884	-0.00187367	-0.233858		0.18294		-0.0621146	0.545877	-0.0974717	-0.502694		-0.480172			-0.108598	0.104799
-0.490713	0.0382137	-0.0381192	-0.261483		0.182593		-0.0619826	0.613051	-0.123614	-0.523018		-0.540298			-0.120537	0.113557
-0.513095	0.045274	-0.0779975	-0.282199		0.183121		-0.0619258	0.664054	-0.151207	-0.546643		-0.595961			-0.133658	0.121453
-0.537155	0.0434012	-0.117313	-0.307333		0.169498		-0.0615589	0.718861	-0.180001	-0.566044		-0.673179			-0.151082	0.130198
-0.559917	0.043587	-0.168547	-0.346676		0.175906		-0.0620277	0.740354	-0.206972	-0.566709		-0.735007			-0.168601	0.136092
-0.598111	0.0447011	-0.247551	-0.418865		0.176963		-0.0620402	0.695016	-0.247593	-0.573722		-0.848114			-0.207932	0.14111
-0.66075	0.0321738	-0.322006	-0.530328		0.17744		-0.0619858	0.593044	-0.329879	-0.615614		-1.004			-0.272191	0.147744
-0.74123	-0.00674192	-0.40395	-0.638925		0.167176		-0.0617146	0.44296	-0.432344	-0.705678		-1.17836			-0.35588	0.154767
-0.827403	-0.0365784	-0.46763	-0.736623		0.128628		-0.0629786	0.283177	-0.526802	-0.825356		-1.37198			-0.444354	0.163791
-0.877404	-0.0458414	-0.520162	-0.794172		0.0751897		-0.0721789	0.135173	-0.628325	-0.960902		-1.54317			-0.52318	0.172069
-0.890509	-0.0623167	-0.572107	-0.805289		-0.0394771		-0.134716	-0.0148823	-0.738221	-1.08482		-1.72345			-0.606578	0.176551
-0.897693	-0.0852113	-0.611977	-0.819646		-0.20237		-0.225033	-0.154494	-0.847066	-1.19729		-1.88643			-0.692721	0.179069
-0.907001	-0.10576	-0.633067	-0.831519		-0.349386		-0.301642	-0.237669	-0.954066	-1.28117		-1.99065			-0.759193	0.180928
-0.920605	-0.125293	-0.650187	-0.83116		-0.462783		-0.386252	-0.303353	-1.04745	-1.33266		-2.04275			-0.81025	0.17991
-0.952569	-0.140915	-0.67199	-0.840386		-0.572673		-0.46381	-0.375202	-1.12432	-1.35782		-2.07557			-0.857525	0.177362
-0.977257	-0.150969	-0.68727	-0.860686		-0.626896		-0.525378	-0.449025	-1.18828	-1.38292		-2.12671			-0.897538	0.178051
-0.987148	-0.154751	-0.697981	-0.879625		-0.661208		-0.58413	-0.500998	-1.26097	-1.43729		-2.19892			-0.936302	0.182976
-0.980516	-0.158398	-0.725381	-0.896497		-0.702228		-0.641509	-0.529647	-1.34264	-1.48401		-2.29307			-0.97539	0.190055
-0.975021	-0.168212	-0.774728	-0.891793		-0.759434		-0.697467	-0.571086	-1.43888	-1.5495		-2.37428			-1.02004	0.196285
-0.98525	-0.182338	-0.844062	-0.87702		-0.816654		-0.786714	-0.600839	-1.55144	-1.62775		-2.48206			-1.07541	0.20506
-0.996747	-0.191512	-0.931488	-0.880043		-0.873331		-0.871141	-0.631429	-1.67217	-1.70208		-2.56248			-1.13124	0.212264
-1.00686	-0.196973	-1.02644	-0.897034		-0.92797		-0.954932	-0.676818	-1.78974	-1.78512		-2.63161			-1.18935	0.218876
-1.01747	-0.204087	-1.11559	-0.928122		-0.974405		-0.992728	-0.731293	-1.8914	-1.85806		-2.70706			-1.24202	0.225694
-1.0278	-0.198722	-1.19124	-0.948704		-1.02709		-1.0039	-0.778326	-1.95694	-1.9162		-2.7023			-1.27512	0.226764
-1.0321	-0.18592	-1.21443	-0.967815		-1.06457		-0.991562	-0.838188	-1.99628	-1.95221		-2.6602			-1.29033	0.224941
-1.02408	-0.174001	-1.21315	-0.988931		-1.10441		-0.970476	-0.940313	-2.03137	-1.98287		-2.65615			-1.30857	0.225195
-1.02409	-0.156182	-1.19618	-1.01706		-1.14435		-0.989188	-1.0917	-2.06622	-2.00026		-2.67532			-1.33606	0.225966
-1.02387	-0.128021	-1.16745	-1.04171		-1.18656		-1.01307	-1.22311	-2.10378	-2.017		-2.69276			-1.35973	0.228508
-1.02538	-0.0941361	-1.13778	-1.06635		-1.23025		-1.02649	-1.2879	-2.14957	-2.03203		-2.71186			-1.37617	0.232934
-1.01544	-0.0577372	-1.1224	-1.1045		-1.26308		-1.02101	-1.31184	-2.2019	-2.038		-2.74398			-1.38799	0.238956
-1.02506	-0.0104479	-1.10823	-1.15496		-1.29604		-1.04349	-1.30284	-2.26694	-2.05233		-2.79244			-1.40528	0.24675
-1.03372	0.0310048	-1.12233	-1.21787		-1.32667		-1.0738	-1.30157	-2.34749	-2.07704		-2.86125			-1.43307	0.255911
-1.039	0.0762937	-1.14846	-1.26473		-1.35916		-1.10427	-1.33383	-2.42399	-2.09381		-2.93275			-1.46237	0.265104
-1.03935	0.115731	-1.17148	-1.30091		-1.40572		-1.06734	-1.38172	-2.50349	-2.1039		-2.9994			-1.48576	0.274839
-1.04906	0.153026	-1.20157	-1.3441		-1.45858		-1.01654	-1.4412	-2.57811	-2.14237		-3.05751			-1.5136	0.284547
-1.04575	0.198323	-1.21882	-1.39428		-1.50162		-1.04188	-1.52409	-2.65061	-2.18852		-3.12174			-1.5489	0.294306
-1.03205	0.250304	-1.20869	-1.45169		-1.55292		-1.09846	-1.62539	-2.73934	-2.24684		-3.18431			-1.58894	0.305523
-1.02211	0.308258	-1.20801	-1.48801		-1.60819		-1.16209	-1.69533	-2.83509	-2.3049		-3.24593			-1.62614	0.317404
-1.02889	0.364549	-1.19693	-1.47992		-1.68966		-1.20975	-1.74495	-2.92923	-2.34488		-3.26316			-1.65228	0.326672
-1.04402	0.409967	-1.18615	-1.45389		-1.76904		-1.24667	-1.78698	-3.03064	-2.38594		-3.2752			-1.67686	0.335687
-1.04973	0.449268	-1.16601	-1.43094		-1.8423		-1.26691	-1.83873	-3.13222	-2.41261		-3.29529			-1.69855	0.345299
-1.06642	0.474328	-1.16122	-1.39168		-1.91738		-1.26712	-1.879	-3.22499	-2.41689		-3.31467			-1.7165	0.353162
-1.08614	0.490315	-1.17675	-1.35897		-1.97018		-1.2642	-1.89784	-3.32408	-2.42622		-3.36324			-1.73773	0.361841
-1.10943	0.488999	-1.20965	-1.36373		-2.02984		-1.27199	-1.91216	-3.40306	-2.43754		-3.38696			-1.76353	0.366377
-1.12473	0.493892	-1.23838	-1.41427		-2.08551		-1.31207	-1.92734	-3.47274	-2.46517		-3.36568			-1.7912	0.368315
-1.13406	0.490166	-1.25432	-1.4718		-2.13982		-1.37508	-1.96436	-3.54213	-2.50547		-3.33448			-1.82314	0.369667
-1.15607	0.481153	-1.27217	-1.52902		-2.18769		-1.42257	-1.99896	-3.59345	-2.55229		-3.29194			-1.8523	0.369438
-1.19618	0.465884	-1.29377	-1.57351		-2.24354		-1.44701	-2.02411	-3.60076	-2.59086		-3.23681			-1.87407	0.365995
-1.23312	0.433463	-1.31411	-1.59363		-2.28819		-1.44317	-2.02589	-3.60981	-2.60772		-3.22155			-1.89037	0.363196
-1.26813	0.411232	-1.3411	-1.59686		-2.31891		-1.40797	-2.023	-3.61647	-2.58861		-3.24185			-1.89917	0.362078
-1.29812	0.38328	-1.35853	-1.57344		-2.32987		-1.36059	-2.02022	-3.64513	-2.56189		-3.28893			-1.90535	0.363289
-1.32887	0.35451	-1.38444	-1.55093		-2.33466		-1.33211	-2.01404	-3.68442	-2.56034		-3.36556			-1.92009	0.366441
-1.33529	0.341782	-1.41904	-1.51995		-2.34531		-1.31603	-2.0139	-3.72132	-2.56166		-3.45095			-1.93417	0.371503
-1.33684	0.33037	-1.44624	-1.48974		-2.34855		-1.31655	-2.02244	-3.7703	-2.56703		-3.48863			-1.9456	0.37518
-1.35125	0.324095	-1.47679	-1.4686		-2.35815		-1.35484	-2.02327	-3.82935	-2.57971		-3.46442			-1.95823	0.376137
-1.35237	0.325204	-1.49319	-1.4505		-2.36555		-1.38875	-2.02256	-3.87684	-2.59171		-3.44121			-1.96575	0.377574
-1.35546	0.333184	-1.50073	-1.43719		-2.38071		-1.3847	-2.03726	-3.93618	-2.58688		-3.44503			-1.9731	0.38187
-1.35839	0.338538	-1.51558	-1.45089		-2.37938		-1.36918	-2.04566	-3.99151	-2.57287		-3.44429			-1.97892	0.384944
-1.3596	0.339223	-1.53281	-1.46114		-2.39928		-1.35253	-2.04846	-4.03836	-2.56861		-3.43875			-1.98603	0.387557
-1.37088	0.341735	-1.57221	-1.45646		-2.41827		-1.33252	-2.05716	-4.08596	-2.56966		-3.44418			-1.99656	0.390768
-1.37502	0.332736	-1.60996	-1.43659		-2.41766		-1.3186	-2.06675	-4.13344	-2.57051		-3.45682			-2.00526	0.393617
-1.36723	0.320789	-1.64234	-1.41623		-2.41844		-1.3074	-2.07373	-4.16453	-2.57656		-3.46909			-2.01148	0.39567
-1.36533	0.307313	-1.68388	-1.41644		-2.41173		-1.29603	-2.08916	-4.1977	-2.59546		-3.48825			-2.02367	0.397684
-1.37752	0.279909	-1.71808	-1.42487		-2.4202		-1.28423	-2.12029	-4.2427	-2.6186		-3.51306			-2.04396	0.399743
-1.3933	0.241264	-1.74183	-1.42456		-2.43285		-1.27489	-2.14357	-4.27959	-2.6495		-3.53367			-2.06325	0.400741
-1.40524	0.214064	-1.75696	-1.42952		-2.44851		-1.26695	-2.16888	-4.31393	-2.68252		-3.55776			-2.08162	0.402596
-1.41177	0.184095	-1.75036	-1.44645		-2.4662		-1.25652	-2.18803	-4.34475	-2.70999		-3.5774			-2.09674	0.403967
-1.41365	0.163539	-1.73103	-1.44525		-2.4824		-1.26009	-2.19148	-4.38082	-2.73612		-3.59841			-2.10757	0.406489
-1.41641	0.156365	-1.74627	-1.42733		-2.49485		-1.26731	-2.17884	-4.42891	-2.76196		-3.61715			-2.11827	0.410311
-1.42341	0.152	-1.77955	-1.40263		-2.51121		-1.26544	-2.14985	-4.48059	-2.77731		-3.63562			-2.12736	0.4145
-1.44053	0.150204	-1.77051	-1.38379		-2.50692		-1.26156	-2.16118	-4.53323	-2.8022		-3.65215			-2.13619	0.419019
-1.46392	0.14596	-1.7363	-1.38221		-2.52378		-1.25625	-2.20863	-4.58431	-2.83247		-3.65553			-2.14974	0.422991
-1.48834	0.145558	-1.71021	-1.39181		-2.57463		-1.2558	-2.24273	-4.63287	-2.86277		-3.65103			-2.16646	0.426709
-1.50573	0.145983	-1.69059	-1.41139		-2.6162		-1.275	-2.26636	-4.67339	-2.88539		-3.64423			-2.18223	0.429086
-1.51705	0.149186	-1.70518	-1.42837		-2.65926		-1.31648	-2.28691	-4.69235	-2.90523		-3.6426			-2.20042	0.42966
-1.51714	0.148883	-1.74157	-1.42711		-2.6975		-1.34591	-2.30162	-4.6968	-2.9246		-3.64139			-2.21448	0.429638
-1.51381	0.138007	-1.78174	-1.41759		-2.71382		-1.33958	-2.31582	-4.7144	-2.93647		-3.64079			-2.2236	0.430464
-1.51766	0.129401	-1.80987	-1.41638		-2.70255		-1.31789	-2.32693	-4.72914	-2.945		-3.64081			-2.22768	0.431079
-1.51866	0.128499	-1.8141	-1.41698		-2.69874		-1.31373	-2.3285	-4.73117	-2.94645		-3.64061			-2.22804	0.431154

## Sheet: y_plus6sep
Fly1	Fly2	Fly3	Fly4	Fly5	Fly6	Fly7	Fly8	Fly9	Fly10	Fly11	Fly12	Fly13			AVG	SEM
1.03396e-07	-4.53508e-07	-2.73552e-07	-2.28385e-07		-1.7257e-07		-7.20713e-08	-9.26244e-08	-5.39274e-07	-6.03112e-07		-1.33282e-07			-2.46498e-07	7.08375e-08
-2.97617e-07	8.25633e-07	5.51363e-07	3.91491e-07		3.3788e-07		1.40383e-07	1.47405e-07	1.03256e-06	1.33988e-06		2.04918e-07			4.6739e-07	1.52826e-07
7.84128e-07	-1.40032e-06	-1.0711e-06	-6.01845e-07		-6.33525e-07		-2.61549e-07	-1.95762e-07	-1.88097e-06	-2.88951e-06		-2.51198e-07			-8.40165e-07	3.24636e-07
-1.94685e-06	2.11634e-06	1.99092e-06	7.40499e-07		1.12313e-06		4.59248e-07	1.48166e-07	3.19638e-06	6.05297e-06		1.1701e-07			1.39978e-06	6.79466e-07
4.62477e-06	-2.49738e-06	-3.49234e-06	-3.59528e-07		-1.83169e-06		-7.36404e-07	2.75621e-07	-4.85375e-06	-1.23099e-05		6.64996e-07			-2.05156e-06	1.40384e-06
-1.06744e-05	6.3109e-07	5.46806e-06	-2.03542e-06		2.49772e-06		9.83991e-07	-1.92212e-06	5.63962e-06	2.40043e-05		-3.44999e-06			2.11428e-06	2.85676e-06
2.36673e-05	8.72032e-06	-7.1137e-06	1.01471e-05		-2.25884e-06		-7.94493e-07	6.77537e-06	-1.49998e-06	-4.47561e-05		1.13886e-05			4.27567e-07	5.74903e-06
-4.88354e-05	-3.47019e-05	9.27266e-06	-2.92839e-05		6.00054e-08		-8.82255e-07	-1.77145e-05	-1.47212e-05	8.57886e-05		-2.97311e-05			-8.0749e-06	1.18582e-05
0.000114441	0.000137201	1.68822e-05	0.000102588		2.53454e-05		1.01702e-05	5.7268e-05	9.45717e-05	-0.000127524		9.16924e-05			5.22635e-05	2.42795e-05
-0.000273555	-0.000506918	-0.000197071	-0.000369509		-0.00012764		-4.01658e-05	-0.000190543	-0.000433936	-2.49136e-05		-0.0002801			-0.000244435	5.06925e-05
-0.000119853	-8.25665e-05	-0.0005386	-0.000236291		-0.000275328		7.38022e-06	-0.000132328	-4.6887e-05	-0.00120055		-0.000104144			-0.000272917	0.000114018
-0.000833798	-0.00062282	0.00103428	-9.63962e-05		-0.000413398		-0.000295007	-0.00022473	0.000138716	0.00398554		-0.000782042			0.000189035	0.000454956
0.0236452	0.054039	0.0418743	0.0437602		0.0222923		0.00402791	0.0220143	0.0499742	0.0610946		0.0284667			0.0351189	0.00562978
0.118174	0.174413	0.149043	0.15833		0.0963539		0.0166679	0.0842461	0.13843	0.185139		0.116351			0.123715	0.0157233
0.255356	0.309813	0.318265	0.331873		0.226114		0.0473165	0.162845	0.240366	0.373287		0.252145			0.251738	0.0297179
0.409394	0.431797	0.532231	0.561825		0.386352		0.0814513	0.235686	0.333263	0.598534		0.418502			0.398903	0.0491743
0.580356	0.55205	0.698017	0.808956		0.571098		0.107615	0.310894	0.417025	0.842005		0.611575			0.549959	0.0707071
0.763084	0.664475	0.880666	1.06175		0.7626		0.128005	0.395763	0.501464	1.06837		0.81363			0.70398	0.0931109
0.95496	0.769955	1.08149	1.2818		0.932434		0.129725	0.474868	0.574761	1.31026		0.931429			0.844167	0.116317
1.15055	0.889409	1.25496	1.47228		1.06902		0.124094	0.564223	0.644545	1.49917		0.918717			0.958697	0.135396
1.31831	1.00216	1.41629	1.64051		1.17603		0.123949	0.65462	0.712352	1.64254		0.95183			1.06386	0.151282
1.45969	1.10545	1.56356	1.80143		1.21778		0.123647	0.747955	0.775608	1.77201		0.98438			1.15515	0.165568
1.61189	1.19989	1.68377	1.96463		1.20347		0.123892	0.830102	0.831484	1.88413		0.980766			1.2314	0.180285
1.76428	1.27225	1.7909	2.12772		1.18703		0.123932	0.915755	0.879281	1.99677		0.995974			1.30539	0.195522
1.93395	1.32288	1.88354	2.29058		1.20587		0.137872	1.00273	0.923901	2.0749		1.01294			1.37892	0.209072
2.12709	1.36447	1.97076	2.43315		1.23694		0.15819	1.08676	0.962002	2.10081		1.02488			1.4465	0.220906
2.30448	1.40049	2.05669	2.56362		1.24894		0.165543	1.16672	0.999397	2.1086		1.02575			1.50402	0.233307
2.46626	1.43639	2.13667	2.69212		1.23786		0.165106	1.24458	1.04753	2.11157		1.01924			1.55573	0.246282
2.58574	1.45986	2.20581	2.82322		1.22899		0.165235	1.33673	1.0977	2.13908		1.03741			1.60798	0.257744
2.67505	1.46853	2.27668	2.96735		1.22901		0.1651	1.42142	1.14414	2.17903		1.11903			1.66453	0.267951
2.76821	1.47416	2.35977	3.11002		1.22913		0.165153	1.51097	1.1943	2.22534		1.25609			1.72932	0.277867
2.8649	1.46946	2.43547	3.25118		1.23154		0.165131	1.6074	1.24158	2.26878		1.38688			1.79223	0.288438
2.96867	1.46303	2.49543	3.38905		1.23887		0.165139	1.70995	1.28292	2.30588		1.55732			1.85763	0.298752
3.04339	1.46235	2.57211	3.50898		1.23882		0.165148	1.81581	1.31963	2.30704		1.7236			1.91569	0.307761
3.11523	1.48654	2.6778	3.61742		1.23717		0.165099	1.91952	1.36859	2.30865		1.95363			1.98496	0.316788
3.19831	1.53682	2.82177	3.7292		1.23662		0.165233	2.01374	1.44909	2.32967		2.16256			2.0643	0.32766
3.30375	1.61156	2.98177	3.84364		1.26051		0.164712	2.11258	1.57083	2.39584		2.36127			2.16065	0.339193
3.42541	1.70071	3.15938	3.96864		1.34399		0.166399	2.21767	1.70854	2.50327		2.57416			2.27682	0.350912
3.53351	1.84122	3.35496	4.12855		1.49931		0.169873	2.3336	1.8872	2.66343		2.77358			2.41852	0.361394
3.63609	1.99682	3.55794	4.31658		1.70351		0.218911	2.47381	2.11612	2.86164		2.99913			2.58806	0.368951
3.74132	2.16224	3.76714	4.50984		1.95189		0.360594	2.64081	2.3646	3.08801		3.23733			2.78238	0.369801
3.84716	2.3438	3.96808	4.70169		2.19433		0.559565	2.81743	2.62571	3.34569		3.45572			2.98592	0.366434
3.93527	2.5362	4.17592	4.88597		2.40069		0.805341	3.03391	2.86285	3.60915		3.64451			3.18898	0.359853
4.00599	2.74712	4.37109	5.03896		2.65292		1.10895	3.28841	3.09258	3.87667		3.82536			3.40081	0.345523
4.07534	2.9713	4.53592	5.17288		2.88553		1.45529	3.56812	3.3371	4.13953		4.04011			3.61811	0.327159
4.1798	3.19756	4.71364	5.31594		3.14081		1.80807	3.8816	3.57974	4.39202		4.26402			3.84732	0.309854
4.32587	3.45022	4.90002	5.44793		3.40404		2.14302	4.20914	3.81411	4.64525		4.49532			4.08349	0.294181
4.48105	3.74769	5.08508	5.57609		3.69912		2.43153	4.56348	4.04967	4.88353		4.71012			4.32274	0.280286
4.6217	4.06808	5.27201	5.73255		4.00681		2.69852	4.96166	4.27405	5.11415		4.90897			4.56585	0.270193
4.76708	4.40478	5.46246	5.89556		4.31801		2.98026	5.36495	4.50186	5.33665		5.05273			4.80843	0.260328
4.9061	4.75875	5.64598	6.08446		4.63296		3.27174	5.78413	4.72173	5.5517		5.18887			5.05464	0.253519
5.0381	5.13582	5.8532	6.30066		4.91821		3.56702	6.22894	4.94096	5.75197		5.35513			5.309	0.252767
5.16822	5.55026	6.0742	6.51244		5.20341		3.83912	6.67391	5.14282	5.96827		5.47772			5.56104	0.258242
5.29737	5.97787	6.3156	6.70902		5.49909		4.10809	7.07958	5.32472	6.20982		5.62503			5.81462	0.266441
5.44104	6.43149	6.55757	6.90271		5.79668		4.37569	7.31471	5.49904	6.44502		5.84045			6.06044	0.268132
5.5853	6.90458	6.7977	7.08838		6.11779		4.62649	7.51293	5.68215	6.67324		6.08187			6.30704	0.271185
5.74927	7.3923	7.07631	7.2661		6.45912		4.92696	7.75424	5.89103	6.88229		6.34849			6.57461	0.275123
5.91216	7.87669	7.38205	7.43533		6.79875		5.22748	8.03149	6.10585	7.06216		6.62176			6.84537	0.283648
6.06906	8.34428	7.71823	7.61909		7.15729		5.4834	8.34607	6.32389	7.23528		6.90202			7.11986	0.299778
6.21667	8.79897	8.06361	7.79814		7.51641		5.69343	8.67175	6.55786	7.41509		7.17304			7.3905	0.320756
6.3604	9.24334	8.42554	7.95479		7.88888		5.88139	9.01274	6.80128	7.60771		7.43511			7.66112	0.344889
6.50993	9.6493	8.76637	8.10212		8.27741		6.02583	9.35862	7.0388	7.79588		7.73333			7.92576	0.370284
6.67575	10.0504	9.09536	8.28751		8.67947		6.14949	9.7022	7.28259	7.98642		8.05948			8.19686	0.396577
6.87315	10.393	9.38877	8.50944		9.0752		6.29903	10.0235	7.52109	8.19084		8.42148			8.46954	0.415889
7.05653	10.7463	9.62619	8.74966		9.48136		6.48656	10.3056	7.76355	8.44724		8.79051			8.74535	0.431598
7.23231	11.1173	9.87134	8.97		9.8945		6.68394	10.5622	8.00736	8.74193		9.15568			9.02366	0.447748
7.41128	11.4791	10.1374	9.12325		10.3061		6.85995	10.8021	8.25738	9.05952		9.47634			9.29124	0.464827
7.60629	11.8203	10.4307	9.2248		10.7199		7.03861	11.0494	8.51507	9.37251		9.73867			9.55163	0.481618
7.8098	12.1529	10.7041	9.31977		11.1292		7.226	11.3028	8.76831	9.64929		9.91966			9.79818	0.497739
8.02218	12.4796	10.9374	9.46328		11.5313		7.36299	11.5503	9.02398	9.89332		10.0716			10.0336	0.515179
8.23421	12.7874	11.1652	9.64726		11.9307		7.48044	11.8001	9.26219	10.1101		10.2661			10.2684	0.533259
8.43768	13.0693	11.391	9.80459		12.3188		7.62021	12.077	9.52883	10.2965		10.5021			10.5046	0.549791
8.62733	13.3348	11.6056	9.92807		12.6866		7.77581	12.3497	9.79886	10.5165		10.754			10.7377	0.564778
8.80866	13.5761	11.8233	10.0531		13.0385		7.92255	12.6185	10.081	10.7509		11.0079			10.9681	0.578841
8.96555	13.8064	12.0489	10.2163		13.3568		8.08512	12.887	10.3761	11.0115		11.2838			11.2038	0.590631
9.12904	14.0314	12.2752	10.3736		13.6659		8.26955	13.1504	10.673	11.287		11.6004			11.4456	0.600552
9.2999	14.2687	12.5005	10.562		13.9683		8.4586	13.417	10.9725	11.5583		11.9068			11.6912	0.609968
9.46406	14.5056	12.7164	10.758		14.252		8.63322	13.6866	11.2708	11.8234		12.2723			11.9382	0.62017
9.60764	14.7421	12.9188	10.8762		14.5077		8.80844	13.9612	11.5503	12.0375		12.6461			12.1656	0.632608
9.71767	14.9688	13.1089	10.928		14.7309		8.99016	14.2282	11.8361	12.1854		12.972			12.3666	0.645891
9.80611	15.2038	13.2931	10.9708		14.9286		9.18015	14.4927	12.1104	12.2836		13.2404			12.551	0.659514
9.88863	15.4605	13.4689	11.0549		15.1282		9.37469	14.7631	12.3683	12.379		13.3602			12.7246	0.672264
9.95514	15.7387	13.6317	11.1694		15.3431		9.5233	15.0351	12.6125	12.485		13.3884			12.8882	0.68866
10.0228	16.0361	13.7911	11.3174		15.5748		9.62187	15.3159	12.8464	12.5781		13.4323			13.0537	0.709481
10.0919	16.3352	13.9262	11.4659		15.8233		9.70023	15.6004	13.077	12.6298		13.4442			13.2094	0.732688
10.1634	16.647	14.0544	11.6136		16.0717		9.77045	15.8913	13.3067	12.6437		13.4453			13.3608	0.758095
10.2389	16.9732	14.203	11.7543		16.3425		9.8557	16.1828	13.5339	12.6312		13.4404			13.5156	0.78567
10.3283	17.3091	14.3649	11.9135		16.5456		9.93363	16.4909	13.7423	12.6375		13.4381			13.6704	0.811648
10.4072	17.6384	14.5155	12.0911		16.7854		9.94542	16.8	13.9292	12.6765		13.4568			13.8246	0.842204
10.4627	17.9471	14.7108	12.2548		17.0697		9.91741	17.1051	14.0905	12.7339		13.53			13.9822	0.876888
10.5179	18.2383	14.9169	12.4223		17.3509		9.91114	17.3729	14.2244	12.8067		13.6368			14.1398	0.9077
10.5793	18.4909	15.1349	12.5771		17.6396		9.91256	17.6082	14.3628	12.8996		13.7781			14.2983	0.934858
10.6601	18.7021	15.3563	12.744		17.924		9.90789	17.8568	14.5021	13.0022		13.9324			14.4588	0.959441
10.7493	18.8968	15.5762	12.9067		18.205		9.90474	18.0975	14.6438	13.1358		14.0867			14.6202	0.982001
10.8378	19.0884	15.7863	13.0444		18.4886		9.90192	18.3229	14.7776	13.2799		14.2525			14.778	1.00421
10.9426	19.255	15.993	13.1635		18.7898		9.90119	18.5275	14.9046	13.4247		14.421			14.9323	1.02475
11.053	19.4327	16.1799	13.276		19.0923		9.90565	18.7122	15.0435	13.5575		14.5897			15.0843	1.04484
11.1787	19.6183	16.3597	13.397		19.3972		9.95335	18.8865	15.1947	13.5978		14.7515			15.2335	1.06343
11.3194	19.8056	16.5119	13.5316		19.6793		10.0518	19.0586	15.3447	13.6115		14.9026			15.3817	1.07773
11.4604	19.9983	16.635	13.6649		19.9144		10.1769	19.1462	15.5077	13.6459		15.0292			15.5179	1.08517
11.5857	20.1917	16.7408	13.785		20.196		10.3262	19.1498	15.6728	13.6939		15.0799			15.6422	1.0915
11.7028	20.3615	16.8529	13.887		20.4446		10.4814	19.1871	15.8425	13.7521		15.0848			15.7597	1.0974
11.8132	20.5091	16.9682	13.9665		20.6858		10.62	19.2316	16.0077	13.8077		15.1141			15.8724	1.10407
11.8842	20.6448	17.1065	14.0392		20.9281		10.7012	19.268	16.1601	13.8615		15.1544			15.9748	1.11522
11.9572	20.773	17.2665	14.1014		21.1833		10.7038	19.2999	16.2881	13.9128		15.1907			16.0677	1.13132
12.0501	20.8939	17.4313	14.1574		21.4145		10.6815	19.3352	16.4091	13.9468		15.2278			16.1548	1.14728
12.1606	20.9833	17.5987	14.2117		21.4907		10.6841	19.3578	16.5342	13.9618		15.2667			16.225	1.1522
12.1841	20.9972	17.6321	14.2222		21.4908		10.6859	19.3604	16.559	13.9629		15.2747			16.2369	1.15213
