# Supplementary material for: How spatial release from masking may fail to function in a highly directional auditory system
Source: eLife. 2017 Apr 25;6:e20731. doi: 10.7554/eLife.20731 (PMC5443663; doi:10.7554/eLife.20731)
Supplement: Figure 5—source data 1. — The target signal was presented at 76 dB SPL from a forward speaker. ‘X’ and ‘Y’ coordinates of virtual walking paths measured from the treadmill system. Data plotted in Figure 5A. DOI: http://dx.doi.org/10.7554/eLife.20731.017 [file elife-20731-fig5-data1.xlsx]

## Sheet: control x
fly1	fly2	fly3	fly4	fly5	fly6	fly7	fly8	fly9	fly10	fly11	fly12		Avg	SEM
-0.000410644	0.00020654	1.01502e-07	6.54806e-07	-0.000104273	0.000414854	-1.5413e-08	-9.2249e-05	1.04981e-07	0.00130888	1.43291e-07	8.21476e-05		0.000117187	0.000121789
-0.000895769	0.000441168	-8.45346e-07	-1.18097e-06	-0.000193907	0.000775485	4.7991e-07	-0.00018346	-1.1085e-06	0.00261651	-1.51213e-06	0.000241669		0.000233127	0.00024498
-0.0013723	0.000609297	-8.68599e-07	-3.67545e-07	-0.000275004	0.00109079	3.75752e-07	-0.000260212	-4.55575e-06	0.00389101	-1.78601e-07	0.000350164		0.000335679	0.000364089
-0.00173701	0.000745025	-1.34959e-06	-1.11795e-06	-0.000341879	0.00142767	2.47602e-08	-0.000331844	-3.89452e-06	0.00527207	-2.42676e-06	0.000425717		0.000454248	0.000487242
-0.0019821	0.000877595	-4.06028e-06	-3.0587e-06	-0.000410089	0.00173819	1.65704e-07	-0.000393334	-1.34802e-05	0.00660769	1.92735e-05	0.000490852		0.000577304	0.000602688
-0.00217994	0.000919331	8.69491e-06	1.41903e-06	-0.000464562	0.00203453	3.79103e-07	-0.000452874	-1.0232e-05	0.00788509	0.000105001	0.000486053		0.000694407	0.000711343
-0.00238923	0.00091846	6.37099e-05	3.71356e-05	-0.000468519	0.00233167	-2.17757e-05	-0.000510197	5.58524e-05	0.00915912	0.000187395	0.000431599		0.000816268	0.000819242
-0.00262011	0.000892746	0.000161732	0.00013021	-0.00042282	0.00262942	-9.23076e-05	-0.000568443	0.000341273	0.0104227	0.000241414	0.000385499		0.000958438	0.000925486
-0.00283723	0.000838191	0.000283459	0.000221126	-0.000282977	0.0029664	-0.000137546	-0.000596974	0.000910064	0.0117838	0.000304791	0.000422504		0.0011563	0.00103737
-0.00303659	0.000747021	0.000488643	0.000378404	-4.32237e-05	0.00337736	-0.000100093	-0.000569759	0.00177141	0.0132864	0.00038546	0.000429718		0.00142623	0.00115959
-0.00326226	0.000568893	0.000805757	0.000602357	0.000293066	0.00386886	-1.7726e-05	-0.000474529	0.00305978	0.0148266	0.00042065	0.000386382		0.00175649	0.00129027
-0.003605	0.000282019	0.00122539	0.000780716	0.000812405	0.00446066	0.000113651	-0.000218577	0.00474898	0.0163534	0.000315863	0.000434724		0.00214202	0.0014329
-0.00399409	-0.000185951	0.00185522	0.00105028	0.00164062	0.00518427	0.00035881	0.000150164	0.00694033	0.0178286	0.000142506	0.000492736		0.00262195	0.0015908
-0.00430248	-0.000734357	0.00269485	0.00144728	0.00273068	0.00602832	0.000725431	0.000547453	0.00966883	0.0192786	-2.36555e-05	0.000586871		0.00322065	0.0017711
-0.00458302	-0.00137346	0.00366383	0.00195153	0.00400389	0.00707775	0.00109808	0.00101477	0.0128487	0.0207233	-0.000138217	0.000806698		0.00392449	0.00198265
-0.00493048	-0.0021062	0.00477699	0.00255599	0.00549981	0.00841572	0.00154532	0.00149749	0.0166333	0.0220209	-0.000193379	0.00104099		0.0047297	0.00223279
-0.00526439	-0.00281338	0.00596155	0.00320422	0.00719415	0.00992018	0.00212261	0.0019978	0.0209557	0.0231287	-0.000284616	0.00120139		0.00561032	0.00251961
-0.00551895	-0.00368725	0.00713426	0.00383049	0.009089	0.0115381	0.00269401	0.00252676	0.0257416	0.0240156	-0.000378049	0.00130341		0.00652408	0.0028464
-0.00587443	-0.00464205	0.00828511	0.00434617	0.0110901	0.0133886	0.00333478	0.00308252	0.0309125	0.0246237	-0.000471289	0.00137957		0.00745461	0.00321412
-0.00627487	-0.00551901	0.0093964	0.00490077	0.0130715	0.015422	0.00402817	0.00371621	0.0363278	0.0248619	-0.000571781	0.00140397		0.00839692	0.0036044
-0.00664478	-0.00628247	0.0104474	0.00543025	0.0150076	0.0175329	0.00465717	0.00435122	0.0419712	0.0246038	-0.000748525	0.00142113		0.00931225	0.00401173
-0.00707493	-0.0068169	0.0113852	0.00593793	0.0167755	0.0197735	0.00520569	0.00499672	0.0477651	0.0239814	-0.00106539	0.00126445		0.0101774	0.00444007
-0.00740334	-0.00719921	0.0121554	0.00657237	0.0182424	0.0221538	0.00563324	0.00564463	0.0537924	0.0231099	-0.00141672	0.000681061		0.0109972	0.00489563
-0.00760306	-0.00741895	0.0126267	0.00713917	0.0193122	0.0247258	0.00584457	0.00619543	0.0600125	0.0219739	-0.00191907	-0.000119165		0.0117308	0.00537729
-0.00787186	-0.00747881	0.0128058	0.00759946	0.0199088	0.0274528	0.00586607	0.00671798	0.0663051	0.0205918	-0.00269801	-0.0010509		0.0123457	0.00588332
-0.00821927	-0.00723903	0.0127763	0.00792971	0.0200114	0.0301874	0.0058065	0.00728745	0.0726725	0.0190195	-0.00378442	-0.00219811		0.0128542	0.00641026
-0.00854083	-0.00673432	0.0124877	0.00816222	0.0196532	0.0329828	0.00538988	0.00803276	0.0790938	0.0174397	-0.00512633	-0.00334555		0.0132913	0.00695555
-0.00893174	-0.00607889	0.0120295	0.00841725	0.0187933	0.0359328	0.00461523	0.0090248	0.0856866	0.0159553	-0.00657126	-0.00454058		0.0136943	0.00753251
-0.00930906	-0.00492658	0.0113803	0.00877912	0.0174153	0.0389733	0.00369972	0.010166	0.0923402	0.0145963	-0.00806121	-0.00592444		0.0140941	0.00812445
-0.00949513	-0.00356733	0.010584	0.00927419	0.0155906	0.041938	0.00248019	0.0113826	0.0988908	0.013382	-0.00958897	-0.00744983		0.0144518	0.00872048
-0.00964579	-0.0023484	0.00974446	0.00977973	0.0133598	0.0449272	0.000852762	0.0125919	0.105416	0.0123328	-0.0112457	-0.00925222		0.0147094	0.00934428
-0.00972556	-0.00107487	0.00875715	0.0103161	0.01083	0.0480718	-0.00111289	0.0139543	0.112028	0.0115769	-0.0128657	-0.0112821		0.0149561	0.00999847
-0.00962034	0.000248352	0.00767941	0.0106883	0.0080883	0.0512613	-0.00320543	0.0154968	0.118801	0.0109858	-0.0142654	-0.013384		0.0152312	0.0106752
-0.0093572	0.00172574	0.00653171	0.0108242	0.00512811	0.0545097	-0.00542889	0.0171446	0.125537	0.0104654	-0.015507	-0.0154264		0.0155123	0.0113589
-0.0088797	0.00344132	0.00538869	0.0109355	0.00188986	0.0577312	-0.00781969	0.0191665	0.13207	0.0100664	-0.016613	-0.0172107		0.0158472	0.0120311
-0.00813493	0.00523918	0.00420781	0.010961	-0.00150859	0.060883	-0.0103389	0.0214365	0.138547	0.0095777	-0.0176072	-0.0189126		0.0161958	0.012707
-0.0071533	0.00694942	0.00297362	0.0108751	-0.00495013	0.0640225	-0.0129761	0.023769	0.145013	0.00903179	-0.018415	-0.0206946		0.0165371	0.0133936
-0.0059009	0.00864487	0.0018673	0.0106425	-0.00852185	0.0670793	-0.0155319	0.0261586	0.151314	0.00854087	-0.0191735	-0.0225741		0.0168788	0.0140754
-0.00431134	0.0102212	0.000792505	0.0101156	-0.0122199	0.0701331	-0.0181096	0.0285096	0.157437	0.00794689	-0.0200495	-0.0244167		0.0171708	0.0147567
-0.00261019	0.0115173	-0.000167515	0.00925849	-0.0160264	0.0731227	-0.0207657	0.0308746	0.16341	0.00724157	-0.0210024	-0.0260614		0.0173992	0.0154371
-0.000910956	0.0129743	-0.00101941	0.0080792	-0.0199813	0.0760105	-0.0233778	0.033236	0.169238	0.00635996	-0.0220292	-0.0275731		0.0175838	0.0161153
0.000884056	0.0146861	-0.00179149	0.00655641	-0.0241917	0.0789269	-0.0259222	0.0356556	0.175028	0.00517374	-0.0230244	-0.0288011		0.017765	0.0167997
0.00275799	0.0164479	-0.00241182	0.00480668	-0.0286729	0.0817317	-0.02838	0.0380185	0.180581	0.00380541	-0.0240537	-0.0298562		0.0178978	0.0174751
0.00476373	0.0182376	-0.00304627	0.00297854	-0.0333825	0.0843455	-0.0308688	0.0402591	0.185732	0.00232826	-0.0252497	-0.0305943		0.0179586	0.0181285
0.00681935	0.0199252	-0.00364216	0.00103726	-0.0383369	0.0867887	-0.0333563	0.042485	0.190586	0.00072321	-0.0266451	-0.0308938		0.0179575	0.018768
0.00879966	0.0215403	-0.00425804	-0.00109214	-0.0434043	0.089075	-0.0357844	0.0445218	0.195132	-0.000864539	-0.0282187	-0.0314348		0.0178343	0.0194014
0.0106763	0.0231869	-0.00486055	-0.00339973	-0.0485151	0.0913377	-0.0381941	0.0464732	0.199508	-0.00230363	-0.0298597	-0.0320706		0.0176649	0.0200352
0.0122664	0.0248268	-0.00541803	-0.00582509	-0.0536786	0.0936388	-0.040606	0.0484009	0.203816	-0.00365535	-0.031707	-0.0324176		0.0174701	0.0206741
0.0134471	0.0262906	-0.00617175	-0.00826219	-0.0588498	0.0959323	-0.0430691	0.0501987	0.208017	-0.00494601	-0.0336913	-0.0326076		0.0171907	0.0213143
0.0143558	0.0277824	-0.00694454	-0.0106156	-0.0638805	0.0980859	-0.0454503	0.0519287	0.212048	-0.00618282	-0.0355793	-0.0324983		0.0169208	0.0219316
0.0152867	0.0293828	-0.00757706	-0.0129628	-0.0686173	0.100214	-0.0477098	0.0535865	0.21591	-0.00742138	-0.037453	-0.0320535		0.0167154	0.0225245
0.0163694	0.030665	-0.00816355	-0.0152954	-0.0731047	0.102484	-0.0500187	0.0552271	0.219716	-0.00864265	-0.0392445	-0.0314287		0.0165469	0.0231104
0.0175487	0.031652	-0.00875432	-0.0176401	-0.077391	0.104697	-0.0524126	0.0568615	0.22328	-0.00994702	-0.0409197	-0.0306589		0.0163596	0.0236746
0.0188312	0.0323529	-0.00934499	-0.020155	-0.0814893	0.106889	-0.0549097	0.0583584	0.226555	-0.0113685	-0.042498	-0.0296595		0.0161301	0.0242152
0.0201716	0.0327159	-0.00991344	-0.0227859	-0.0852554	0.109228	-0.0575787	0.0595777	0.229629	-0.0128075	-0.0438417	-0.0286814		0.0158715	0.0247371
0.0215786	0.0328233	-0.0103964	-0.0255545	-0.0885615	0.111648	-0.0603784	0.0604694	0.232504	-0.0143212	-0.0449385	-0.0277699		0.0155919	0.0252339
0.0230577	0.0326166	-0.0106982	-0.0284409	-0.0914691	0.114155	-0.0632414	0.0611734	0.235284	-0.0159804	-0.0457891	-0.0265018		0.0153472	0.0257089
0.0246041	0.0321339	-0.0109503	-0.0313466	-0.0940175	0.1167	-0.0661386	0.0618277	0.237767	-0.0179778	-0.046431	-0.0248055		0.0151137	0.0261525
0.0264773	0.0313579	-0.0112044	-0.0342836	-0.0962364	0.119277	-0.069021	0.0623393	0.239862	-0.0204783	-0.0469109	-0.0228105		0.0148641	0.0265642
0.0288351	0.0304258	-0.0113737	-0.0373051	-0.0980486	0.122012	-0.0717835	0.0627475	0.241608	-0.0233581	-0.0472209	-0.0205959		0.0146619	0.0269488
0.0314558	0.029166	-0.0115717	-0.0404905	-0.0996368	0.124932	-0.0745031	0.0631812	0.243071	-0.0265959	-0.0474382	-0.0182203		0.0144459	0.0273253
0.0340738	0.0274316	-0.0118678	-0.0437598	-0.101178	0.128106	-0.0772758	0.0635668	0.244333	-0.0302674	-0.0475965	-0.0159245		0.0141368	0.0277114
0.0367682	0.025618	-0.0121794	-0.0471617	-0.102471	0.131441	-0.0798837	0.0639542	0.245239	-0.0341151	-0.0478035	-0.0136971		0.0138091	0.0280854
0.0395783	0.0236737	-0.0124838	-0.0507095	-0.103454	0.134736	-0.0823329	0.06437	0.246084	-0.0379297	-0.0480943	-0.011412		0.0135022	0.0284558
0.042453	0.0214491	-0.0127391	-0.054248	-0.104187	0.13795	-0.0846373	0.0648541	0.246988	-0.0419513	-0.0483519	-0.00922057		0.0131966	0.0288305
0.0456039	0.0190689	-0.0128407	-0.0578103	-0.104837	0.140962	-0.0865981	0.065557	0.247767	-0.0462701	-0.0487027	-0.00689422		0.0129172	0.0292008
0.0489197	0.0166667	-0.0129278	-0.0614848	-0.105408	0.14378	-0.088287	0.0664074	0.248382	-0.0507684	-0.0490944	-0.00448428		0.0126417	0.0295663
0.0522214	0.0141527	-0.0130787	-0.0653143	-0.105917	0.146565	-0.0897889	0.0673279	0.248818	-0.0554275	-0.0494979	-0.00190072		0.0123467	0.0299325
0.055356	0.0114804	-0.0131881	-0.0692961	-0.106399	0.149266	-0.0911605	0.0683882	0.24928	-0.0601176	-0.0500989	0.00114891		0.0120549	0.0303118
0.0581537	0.0088686	-0.0132606	-0.0734648	-0.106681	0.151774	-0.0924042	0.0696974	0.24964	-0.0647981	-0.0506695	0.00417385		0.0117524	0.0306856
0.0610092	0.00618002	-0.0132051	-0.0778727	-0.106935	0.154147	-0.0935649	0.0710695	0.249891	-0.0695643	-0.0511121	0.00716152		0.0114337	0.0310645
0.0639626	0.00338986	-0.0129719	-0.0825727	-0.107132	0.156449	-0.0947162	0.0723753	0.250097	-0.0744294	-0.0516047	0.0103273		0.0110978	0.0314585
0.0668561	0.000623214	-0.0125885	-0.0874609	-0.107212	0.158622	-0.0956943	0.0739397	0.250253	-0.0794466	-0.0521737	0.013594		0.010776	0.0318626
0.0698298	-0.00219997	-0.0121018	-0.0923089	-0.107293	0.160683	-0.0965935	0.075633	0.250555	-0.0846132	-0.0528353	0.016764		0.0104599	0.0322897
0.0729204	-0.00493932	-0.0116449	-0.0970949	-0.107297	0.162754	-0.0975101	0.0772993	0.250623	-0.0899287	-0.0537042	0.0198329		0.0101092	0.0327224
0.0761057	-0.00736663	-0.0111805	-0.10178	-0.107287	0.164913	-0.0984015	0.0790717	0.250395	-0.095314	-0.0548687	0.0230532		0.00977835	0.0331605
0.078902	-0.00963791	-0.0106109	-0.10621	-0.107179	0.167147	-0.0993405	0.0808889	0.250174	-0.100673	-0.0562035	0.0260576		0.00944292	0.0336018
0.0815089	-0.0119759	-0.0100102	-0.110195	-0.106947	0.169449	-0.10017	0.0830355	0.249919	-0.106161	-0.0577481	0.0289412		0.0091373	0.0340466
0.0846392	-0.0141945	-0.00944224	-0.113695	-0.106554	0.171789	-0.100793	0.0854398	0.249564	-0.111822	-0.0595287	0.0315106		0.00890942	0.0344959
0.0881187	-0.0162687	-0.00877602	-0.116765	-0.106016	0.1741	-0.101342	0.0877734	0.249148	-0.117567	-0.0613196	0.0332603		0.00869545	0.0349373
0.0915024	-0.0182593	-0.0079518	-0.119421	-0.105446	0.176364	-0.101827	0.090212	0.248746	-0.12332	-0.0631801	0.0349029		0.00852678	0.0353747
0.0944446	-0.0200655	-0.00706438	-0.121707	-0.104615	0.178439	-0.10211	0.0929055	0.248084	-0.129056	-0.0652812	0.0365763		0.0083792	0.0357798
0.0973726	-0.0216565	-0.00617632	-0.123634	-0.103593	0.180435	-0.102231	0.0959296	0.247139	-0.134644	-0.0675398	0.0380881		0.00829078	0.0361615
0.100374	-0.0230931	-0.00537249	-0.125323	-0.102433	0.182553	-0.10236	0.09914	0.245936	-0.140007	-0.069796	0.039625		0.00827042	0.0365329
0.102981	-0.0245491	-0.00466152	-0.126832	-0.101119	0.184604	-0.102391	0.102623	0.244302	-0.145386	-0.0720106	0.0414447		0.00825045	0.0368804
0.105391	-0.0261359	-0.00395477	-0.128097	-0.0997752	0.18657	-0.102125	0.10655	0.242563	-0.150725	-0.0741522	0.0435408		0.00830409	0.037222
0.107555	-0.0279731	-0.00328495	-0.129153	-0.0982673	0.188534	-0.101613	0.110783	0.240857	-0.156028	-0.076185	0.0452737		0.00837484	0.0375591
0.109735	-0.0298951	-0.00269634	-0.130062	-0.0966641	0.190479	-0.101009	0.115295	0.239037	-0.161392	-0.0782397	0.0467525		0.00844499	0.0379012
0.111944	-0.0317513	-0.00210445	-0.130902	-0.0950489	0.19228	-0.100445	0.119874	0.237122	-0.16661	-0.0802309	0.0481784		0.00852539	0.0382393
0.113551	-0.0336705	-0.00147157	-0.131691	-0.0933785	0.193767	-0.0999905	0.124637	0.235146	-0.171736	-0.0819475	0.0496298		0.00857049	0.0385587
0.114714	-0.0356018	-0.00083033	-0.132422	-0.091711	0.195095	-0.0994151	0.129785	0.233021	-0.176857	-0.0834958	0.051448		0.00864424	0.0388727
0.116001	-0.0377271	-0.000190293	-0.133047	-0.090152	0.196374	-0.0987161	0.135034	0.230698	-0.181921	-0.0850591	0.0533601		0.00872114	0.0391904
0.117531	-0.040084	0.00048428	-0.13334	-0.088785	0.197578	-0.0980664	0.140274	0.228345	-0.186812	-0.0866922	0.055139		0.00879768	0.0395123
0.11885	-0.0425442	0.00125084	-0.133095	-0.0874874	0.198564	-0.0972409	0.14549	0.225952	-0.191533	-0.0882592	0.0568106		0.00889649	0.0398066
0.119988	-0.0452384	0.00213227	-0.132431	-0.08624	0.199196	-0.0962925	0.150786	0.22352	-0.196234	-0.0898479	0.0585839		0.00899342	0.0400865
0.121077	-0.0480475	0.00318487	-0.131428	-0.0850693	0.199654	-0.0953344	0.156104	0.221087	-0.200936	-0.0916896	0.0603258		0.00907737	0.0403694
0.121915	-0.050884	0.00441218	-0.130193	-0.0837564	0.199886	-0.0942937	0.16121	0.218462	-0.205659	-0.0937105	0.0618073		0.00909963	0.0406296
0.122651	-0.053773	0.00578912	-0.12897	-0.0822589	0.199714	-0.0932139	0.166186	0.215548	-0.210331	-0.0958462	0.0635747		0.00908914	0.0408709
0.123181	-0.0566534	0.00732478	-0.127745	-0.0807302	0.199358	-0.0920279	0.171093	0.212391	-0.214926	-0.0980089	0.0656294		0.00907381	0.041101
0.123392	-0.0594673	0.00903869	-0.126579	-0.0791236	0.19899	-0.0907686	0.176006	0.209102	-0.219651	-0.100263	0.0677005		0.00903135	0.0413382
0.123487	-0.0621767	0.010893	-0.125525	-0.0774406	0.198579	-0.0894766	0.180847	0.205556	-0.22442	-0.10269	0.0698521		0.00895705	0.0415798
0.123678	-0.0649779	0.0127598	-0.12447	-0.0756998	0.198113	-0.0882148	0.185432	0.201664	-0.229101	-0.105217	0.0720276		0.0088327	0.0418147
0.123734	-0.0678322	0.0145528	-0.123462	-0.0738156	0.197554	-0.0869836	0.189999	0.197729	-0.233943	-0.107876	0.0745155		0.00868094	0.0420695
0.123279	-0.0705925	0.0161767	-0.122692	-0.0718707	0.196865	-0.0857917	0.194659	0.193827	-0.239173	-0.110515	0.0773314		0.00845857	0.0423529
0.1226	-0.0733555	0.0176964	-0.1223	-0.0699163	0.19597	-0.0848537	0.199208	0.189897	-0.244802	-0.113261	0.0800017		0.00807372	0.0426662
0.121943	-0.0760041	0.0192117	-0.12229	-0.067908	0.194913	-0.0839375	0.203535	0.185937	-0.250504	-0.116078	0.0822895		0.00759231	0.0429873
0.121339	-0.0784351	0.0207179	-0.122566	-0.065799	0.193756	-0.0828701	0.207646	0.181933	-0.25607	-0.118601	0.0843016		0.00711271	0.0432943
0.120973	-0.0805802	0.0221707	-0.122868	-0.0637532	0.192376	-0.081833	0.211565	0.177936	-0.261718	-0.120961	0.086292		0.00663337	0.0436023
0.120863	-0.0825658	0.0234286	-0.123061	-0.0619258	0.190821	-0.0808773	0.215336	0.174016	-0.267423	-0.123265	0.0883735		0.00614326	0.04392
0.120926	-0.0847053	0.0244751	-0.123133	-0.0601593	0.189026	-0.0799274	0.218965	0.170261	-0.273086	-0.125491	0.0906433		0.0056495	0.0442436
0.121253	-0.0871529	0.0254042	-0.123016	-0.0585004	0.186921	-0.0788352	0.222238	0.166633	-0.278722	-0.127535	0.0930992		0.00514896	0.044561
0.121737	-0.0899239	0.0262894	-0.122692	-0.05698	0.184662	-0.0776568	0.225292	0.163177	-0.28436	-0.129566	0.0955172		0.00462466	0.0448842
0.122277	-0.0925984	0.0271449	-0.122145	-0.0555225	0.182116	-0.0764766	0.228493	0.160013	-0.289983	-0.131774	0.0974972		0.00408681	0.0452144
0.123093	-0.0950493	0.028195	-0.121383	-0.0541468	0.179245	-0.0753117	0.23161	0.157045	-0.29539	-0.133874	0.0988413		0.00357294	0.0455228
0.124285	-0.0975128	0.0295503	-0.120295	-0.0527399	0.176104	-0.0740321	0.234455	0.154152	-0.300509	-0.135884	0.0998468		0.00311848	0.0458034
0.125763	-0.100008	0.0309321	-0.118701	-0.051294	0.172732	-0.0725308	0.237132	0.151201	-0.305467	-0.137849	0.100721		0.00271922	0.0460611
0.12736	-0.102678	0.0323928	-0.116482	-0.0499008	0.169135	-0.0709586	0.239603	0.148161	-0.310553	-0.139929	0.101701		0.00232093	0.046317
0.128973	-0.105686	0.0339542	-0.113834	-0.0485504	0.165197	-0.0693275	0.242063	0.145143	-0.315787	-0.142271	0.10303		0.0019087	0.0465933
0.130375	-0.109059	0.0355873	-0.111017	-0.0471742	0.161246	-0.0677136	0.244833	0.142202	-0.320959	-0.144697	0.104583		0.00151729	0.0468977
0.131513	-0.112536	0.0374555	-0.108035	-0.0457601	0.157343	-0.06611	0.247844	0.139315	-0.326192	-0.147158	0.106191		0.00115586	0.0472267
0.132532	-0.116034	0.0395489	-0.105075	-0.0444152	0.153233	-0.0644844	0.250999	0.136484	-0.331573	-0.149572	0.107775		0.000784914	0.0475772
0.133249	-0.119503	0.0418147	-0.10216	-0.043208	0.148929	-0.0629909	0.254472	0.133769	-0.336951	-0.152074	0.109216		0.000380307	0.0479484
0.134027	-0.122917	0.0441886	-0.0992007	-0.0419539	0.144432	-0.0616203	0.258156	0.131126	-0.342244	-0.15447	0.110502		2.18296e-06	0.04833
0.135269	-0.126567	0.0467136	-0.096303	-0.0405256	0.139849	-0.0604211	0.261769	0.128417	-0.347465	-0.156618	0.111994		-0.000324006	0.0487294
0.136785	-0.130297	0.0493027	-0.0935183	-0.0390961	0.13513	-0.0593128	0.265417	0.12565	-0.352743	-0.158804	0.113551		-0.000661405	0.049155
0.138539	-0.133999	0.0518504	-0.0909531	-0.0377056	0.130387	-0.0582442	0.269275	0.122958	-0.358181	-0.160883	0.114936		-0.00100171	0.0496142
0.140558	-0.137674	0.0544256	-0.088668	-0.0363522	0.125644	-0.0573685	0.273391	0.12043	-0.36352	-0.162818	0.116472		-0.00128997	0.0501046
0.142998	-0.141178	0.0569248	-0.0866973	-0.034989	0.120711	-0.0566366	0.277733	0.118169	-0.368498	-0.164597	0.117898		-0.00151354	0.050602
0.145979	-0.144494	0.0593173	-0.0849613	-0.0335124	0.115771	-0.0560953	0.282021	0.116164	-0.373116	-0.166201	0.118899		-0.00168562	0.0510918
0.149499	-0.147706	0.0616121	-0.0833762	-0.0319799	0.110643	-0.0556927	0.286072	0.114255	-0.377422	-0.167726	0.119716		-0.00184219	0.0515695
0.153599	-0.150941	0.0638054	-0.0819859	-0.0303817	0.105308	-0.0552466	0.289963	0.112382	-0.381533	-0.169196	0.12034		-0.00199052	0.0520468
0.158325	-0.153979	0.0659275	-0.0806926	-0.028655	0.100015	-0.054824	0.293672	0.110575	-0.385363	-0.170756	0.120599		-0.00209649	0.0525189
0.163617	-0.156932	0.0680385	-0.0795386	-0.026797	0.0946657	-0.0543939	0.297206	0.108848	-0.388826	-0.172362	0.120671		-0.00215026	0.0529846
0.16902	-0.159941	0.070242	-0.078678	-0.0250092	0.0893643	-0.0538549	0.300587	0.107085	-0.391941	-0.174193	0.120653		-0.00222223	0.0534466
0.174218	-0.162878	0.0724505	-0.078055	-0.0234001	0.0842829	-0.0530929	0.303791	0.105287	-0.394675	-0.176309	0.120337		-0.0023369	0.0538893
0.179321	-0.165863	0.0746298	-0.0775568	-0.0218279	0.0794303	-0.052196	0.306957	0.103482	-0.397074	-0.178473	0.119838		-0.00244456	0.054321
0.184516	-0.168868	0.0768709	-0.0771652	-0.0202443	0.0745612	-0.0513882	0.310084	0.101573	-0.399102	-0.180852	0.119171		-0.0025703	0.0547458
0.189879	-0.171981	0.0792073	-0.076887	-0.0186742	0.0695577	-0.0504602	0.313052	0.0996869	-0.400884	-0.183302	0.118192		-0.0027179	0.0551635
0.195213	-0.175083	0.0816092	-0.0767226	-0.0172293	0.064524	-0.0494305	0.315832	0.097795	-0.402573	-0.185687	0.11712		-0.00288607	0.0555746
0.200403	-0.177993	0.0840808	-0.0767336	-0.0159256	0.0594733	-0.0482933	0.318548	0.0957742	-0.404317	-0.1881	0.116026		-0.00308807	0.0559877
0.205602	-0.180794	0.0865874	-0.0768926	-0.0147203	0.054445	-0.0468538	0.321315	0.093759	-0.406177	-0.19046	0.114655		-0.00329451	0.0564109
0.210703	-0.183496	0.0889516	-0.0771077	-0.0135887	0.0493355	-0.0453804	0.324195	0.091817	-0.407974	-0.192853	0.113179		-0.00351821	0.0568379
0.215564	-0.186228	0.0910583	-0.0772983	-0.012469	0.0441765	-0.0438979	0.327314	0.089854	-0.409863	-0.195176	0.111951		-0.00375119	0.0572807
0.220438	-0.188739	0.0928186	-0.0773601	-0.0113741	0.0390813	-0.0423875	0.330488	0.0878608	-0.41188	-0.197387	0.110857		-0.00396527	0.0577296
0.225577	-0.190897	0.094317	-0.0772683	-0.0103172	0.0338134	-0.0408475	0.33365	0.0860255	-0.41405	-0.199373	0.109791		-0.0041315	0.058184
0.231219	-0.19285	0.0956302	-0.0770918	-0.00934128	0.0281427	-0.03924	0.337033	0.0843661	-0.416487	-0.200945	0.108746		-0.0042348	0.0586671
0.237197	-0.194398	0.0965806	-0.0769137	-0.00841049	0.0222322	-0.0377152	0.34058	0.0828556	-0.418937	-0.202316	0.107773		-0.0042893	0.0591594
0.243121	-0.195433	0.0971023	-0.0766411	-0.00753897	0.0163259	-0.0360962	0.344168	0.081561	-0.42128	-0.203501	0.106958		-0.00427126	0.0596356
0.249084	-0.195872	0.0972781	-0.0763012	-0.00675044	0.0105566	-0.0344381	0.347719	0.0804096	-0.423482	-0.204608	0.10624		-0.0041803	0.060094
0.255158	-0.195782	0.0971996	-0.0759726	-0.00593495	0.00498422	-0.032907	0.351268	0.0794127	-0.42551	-0.205626	0.105678		-0.0040026	0.0605412
0.261388	-0.195464	0.0969155	-0.0755254	-0.00516424	-0.000666444	-0.0314715	0.354963	0.0786344	-0.427249	-0.206462	0.105338		-0.00373032	0.0609846
0.267786	-0.194932	0.0966459	-0.0750724	-0.0044826	-0.0063435	-0.0301929	0.358651	0.0780521	-0.42858	-0.20731	0.105201		-0.00338155	0.0614205
0.274309	-0.194129	0.0964333	-0.0746268	-0.00391669	-0.0117483	-0.02897	0.362163	0.0776243	-0.429545	-0.208034	0.105071		-0.0029475	0.0618345
0.281041	-0.193132	0.096274	-0.0742318	-0.00347692	-0.0169819	-0.027735	0.365696	0.0773358	-0.430099	-0.208699	0.104739		-0.0024391	0.0622365
0.288034	-0.191965	0.0964339	-0.0741208	-0.00303915	-0.0220954	-0.0264909	0.369302	0.0771769	-0.430356	-0.209388	0.104281		-0.00185232	0.0626456
0.295111	-0.190649	0.096679	-0.0741555	-0.00257477	-0.027067	-0.0253216	0.372766	0.0771139	-0.430414	-0.210103	0.103816		-0.00123325	0.063049
0.302016	-0.189354	0.0968993	-0.0742165	-0.00207538	-0.03189	-0.0241763	0.375949	0.0772352	-0.430351	-0.211085	0.103464		-0.000631947	0.0634449
0.308958	-0.188326	0.0973418	-0.0743199	-0.00165458	-0.036684	-0.0228648	0.378854	0.0776737	-0.430348	-0.21227	0.103091		-4.58882e-05	0.063856
0.316011	-0.187708	0.0980421	-0.0745748	-0.00131805	-0.0415046	-0.0214496	0.381635	0.0783971	-0.430333	-0.213556	0.102525		0.000513771	0.0642879
0.32308	-0.18757	0.0989561	-0.074983	-0.000957275	-0.0463833	-0.0198562	0.384389	0.0792738	-0.430251	-0.214886	0.101925		0.00106144	0.064739
0.330237	-0.187726	0.0999402	-0.0753752	-0.000604636	-0.0514085	-0.0180166	0.387148	0.080242	-0.430237	-0.216311	0.101307		0.0015997	0.0652143
0.337423	-0.187939	0.101008	-0.0757804	-0.000253081	-0.0562745	-0.0161234	0.389817	0.0813747	-0.430315	-0.217919	0.10055		0.00213081	0.0657038
0.344391	-0.188261	0.102044	-0.0761411	7.48743e-05	-0.060989	-0.0140989	0.392416	0.0826814	-0.430528	-0.219515	0.0997328		0.00265058	0.0661957
0.351107	-0.188691	0.103126	-0.0764657	0.000443305	-0.0657357	-0.0117752	0.395029	0.0840702	-0.430904	-0.221024	0.0989415		0.00317676	0.0666933
0.357779	-0.189314	0.104386	-0.0767137	0.000766602	-0.0703448	-0.00923829	0.397457	0.0856954	-0.431255	-0.222467	0.0980752		0.00373549	0.0671893
0.364376	-0.19014	0.105477	-0.0767286	0.000886537	-0.0748153	-0.00649855	0.399768	0.0876691	-0.43154	-0.223796	0.0972504		0.00432577	0.0676791
0.371126	-0.190958	0.106576	-0.076674	0.000834951	-0.0791665	-0.00355512	0.402181	0.089821	-0.431771	-0.225021	0.0965745		0.00499739	0.0681811
0.377911	-0.191787	0.107831	-0.0766038	0.000576809	-0.0833148	-0.000558316	0.404762	0.0920467	-0.431871	-0.226048	0.0959626		0.00574226	0.0686871
0.384682	-0.192575	0.109052	-0.0764401	0.000227142	-0.0872156	0.00240039	0.407427	0.0941983	-0.431851	-0.226862	0.09546		0.00654191	0.0691859
0.391795	-0.19319	0.11033	-0.0762417	-0.000183221	-0.0909237	0.00531861	0.410135	0.0962796	-0.431844	-0.22755	0.0952424		0.00743068	0.0696998
0.398848	-0.193698	0.111725	-0.076048	-0.000744321	-0.0944509	0.00813718	0.413016	0.0985097	-0.43203	-0.228178	0.095478		0.00838039	0.0702337
0.405878	-0.194275	0.113258	-0.0758721	-0.00142594	-0.0977889	0.0108197	0.415952	0.100926	-0.432378	-0.228739	0.0957771		0.00934429	0.0707827
0.413094	-0.194878	0.114894	-0.0757205	-0.00227303	-0.10104	0.0134898	0.418882	0.103472	-0.432755	-0.2291	0.0959328		0.0103333	0.0713405
0.420529	-0.195383	0.116751	-0.075614	-0.00325656	-0.104216	0.0160643	0.421952	0.106042	-0.43302	-0.229501	0.0960935		0.0113703	0.0719135
0.428306	-0.19581	0.118782	-0.0756099	-0.0043103	-0.107369	0.0183048	0.425173	0.108584	-0.433137	-0.230108	0.0962213		0.0124188	0.0725103
0.436123	-0.195924	0.120828	-0.0757799	-0.0053858	-0.110564	0.0202628	0.428469	0.111045	-0.433264	-0.23075	0.096496		0.0134631	0.0731132
0.44397	-0.195945	0.123075	-0.0761189	-0.00644199	-0.113793	0.0220778	0.431921	0.113386	-0.433344	-0.231464	0.0968305		0.0145126	0.073729
0.451882	-0.196229	0.125431	-0.0765451	-0.00744501	-0.11706	0.0237828	0.435578	0.115694	-0.433374	-0.232223	0.0971195		0.0155508	0.0743662
0.459953	-0.196614	0.127777	-0.0770579	-0.00835338	-0.120349	0.0253726	0.439289	0.117934	-0.433394	-0.23302	0.0974058		0.0165786	0.0750191
0.46797	-0.197149	0.130238	-0.0776133	-0.00930654	-0.123656	0.026878	0.443128	0.120188	-0.43324	-0.233921	0.0976977		0.0176012	0.0756787
0.475648	-0.197706	0.132698	-0.0781631	-0.0102881	-0.126906	0.0283561	0.447042	0.12247	-0.432851	-0.234985	0.0980523		0.018614	0.0763238
0.483374	-0.198283	0.135023	-0.0787535	-0.0111715	-0.130046	0.0298712	0.450899	0.124557	-0.43209	-0.236135	0.0982509		0.0196247	0.0769517
0.491078	-0.199012	0.137352	-0.0793811	-0.0120279	-0.133094	0.031493	0.454771	0.126454	-0.430995	-0.237244	0.0984006		0.0206495	0.0775669
0.498769	-0.199776	0.139705	-0.0801846	-0.0127634	-0.136081	0.03324	0.458618	0.128184	-0.429862	-0.238415	0.0986841		0.0216765	0.0781848
0.50659	-0.200753	0.14191	-0.0811665	-0.0133705	-0.139002	0.0351019	0.462468	0.129854	-0.428734	-0.239436	0.0989704		0.0227028	0.0788115
0.51427	-0.201991	0.144031	-0.0821005	-0.013985	-0.14183	0.0371489	0.466335	0.131532	-0.427591	-0.24019	0.0993059		0.0237446	0.0794318
0.52218	-0.203562	0.14608	-0.0829598	-0.01462	-0.144566	0.0394087	0.47015	0.133134	-0.426441	-0.240901	0.0996225		0.0247939	0.0800661
0.530438	-0.205515	0.147968	-0.0837493	-0.015389	-0.147079	0.0416194	0.473938	0.134698	-0.425291	-0.24165	0.0998093		0.0258165	0.0807213
0.538807	-0.207488	0.149751	-0.0845416	-0.0163627	-0.149335	0.043673	0.47767	0.136169	-0.424126	-0.242511	0.0998594		0.026797	0.0813789
0.547432	-0.209292	0.15136	-0.0854538	-0.0174505	-0.151344	0.0457605	0.48123	0.137612	-0.422946	-0.24347	0.099651		0.0277574	0.0820369
0.556353	-0.210979	0.152742	-0.0864954	-0.0185838	-0.153134	0.0479016	0.484594	0.138965	-0.42183	-0.244432	0.0992624		0.0286969	0.082698
0.565583	-0.212715	0.154026	-0.08758	-0.0198794	-0.154905	0.050036	0.487874	0.140115	-0.420866	-0.2452	0.0986654		0.0295961	0.0833734
0.574669	-0.214562	0.15532	-0.0886788	-0.0213409	-0.156635	0.0520865	0.491304	0.141235	-0.420129	-0.245746	0.0976915		0.0304346	0.0840557
0.583237	-0.216538	0.156534	-0.0898952	-0.0228574	-0.158226	0.054033	0.494928	0.14231	-0.419386	-0.246193	0.0966344		0.0312151	0.0847216
0.591339	-0.218673	0.157518	-0.0909992	-0.0244583	-0.159733	0.0559933	0.498611	0.143398	-0.418507	-0.246485	0.0957709		0.0319812	0.085361
0.59919	-0.220711	0.158339	-0.092004	-0.0260227	-0.161252	0.0579706	0.502337	0.144529	-0.417627	-0.246812	0.0951291		0.0327554	0.0859903
0.607317	-0.222596	0.159115	-0.0931922	-0.0275597	-0.162768	0.0599025	0.50612	0.145569	-0.416711	-0.247233	0.0945684		0.0335442	0.086637
0.615342	-0.224412	0.159851	-0.0944306	-0.0291183	-0.16427	0.061775	0.510116	0.146526	-0.415799	-0.247612	0.0941045		0.0343395	0.0872874
0.622919	-0.226022	0.16051	-0.0957135	-0.0305168	-0.165924	0.0637097	0.514183	0.147511	-0.414985	-0.248007	0.0938243		0.0351241	0.0879231
0.630365	-0.227622	0.161089	-0.0970318	-0.0317574	-0.167707	0.0657708	0.518178	0.148496	-0.414139	-0.248338	0.0933672		0.0358893	0.0885489
0.637429	-0.229362	0.161673	-0.0982406	-0.0328882	-0.169597	0.067771	0.522285	0.149324	-0.413109	-0.248527	0.0929003		0.0366383	0.0891533
0.644253	-0.231188	0.162255	-0.0993864	-0.0338525	-0.171626	0.0697085	0.526518	0.150197	-0.412012	-0.248579	0.0925718		0.037405	0.0897505
0.650977	-0.233021	0.1628	-0.100525	-0.0345849	-0.173643	0.0716846	0.53086	0.151117	-0.410867	-0.248736	0.0919983		0.0381717	0.0903476
0.657636	-0.234671	0.163309	-0.101585	-0.0351082	-0.175635	0.0736742	0.535079	0.15188	-0.409568	-0.249106	0.0914281		0.0389444	0.0909291
0.66482	-0.236329	0.163778	-0.102503	-0.0355645	-0.177708	0.0756462	0.539341	0.152501	-0.408235	-0.249436	0.0909667		0.0397731	0.0915376
0.67213	-0.237926	0.164282	-0.103356	-0.0360376	-0.179788	0.0774345	0.543686	0.152897	-0.406916	-0.249777	0.0902814		0.040576	0.092154
0.6795	-0.239748	0.164838	-0.104151	-0.0365861	-0.181741	0.0791205	0.547919	0.153082	-0.405572	-0.25009	0.0891706		0.0413119	0.0927689
0.686917	-0.241996	0.165396	-0.10486	-0.0370634	-0.183561	0.0807941	0.55204	0.153166	-0.404296	-0.250364	0.0877956		0.0419973	0.0933896
0.694142	-0.244237	0.165955	-0.10557	-0.0373883	-0.185229	0.0823555	0.55589	0.153032	-0.40304	-0.250739	0.0863134		0.0426238	0.093988
0.701574	-0.24677	0.166514	-0.106284	-0.0377662	-0.186631	0.0838721	0.559727	0.152537	-0.40169	-0.251079	0.0847216		0.0432271	0.0945936
0.708403	-0.249399	0.167049	-0.106912	-0.038184	-0.187846	0.0852494	0.563368	0.151968	-0.400446	-0.251286	0.0834171		0.0437818	0.0951601
0.715668	-0.252391	0.167712	-0.107591	-0.0387056	-0.18911	0.0867348	0.567185	0.15125	-0.399322	-0.25145	0.0820438		0.0443354	0.0957732
0.722684	-0.255439	0.168454	-0.10825	-0.0392338	-0.190225	0.0881875	0.570897	0.150319	-0.398277	-0.251645	0.0806198		0.044841	0.096372
0.729335	-0.258571	0.169185	-0.108843	-0.0398175	-0.191204	0.08946	0.574422	0.149342	-0.397269	-0.251699	0.0795497		0.0453242	0.0969428
0.737724	-0.262715	0.170007	-0.109584	-0.0407179	-0.192262	0.090968	0.578564	0.148193	-0.396205	-0.251631	0.0782946		0.0458863	0.0976591
0.742995	-0.265348	0.170504	-0.110061	-0.041317	-0.192867	0.0919211	0.58108	0.147478	-0.395602	-0.251612	0.0774317		0.0462169	0.0981097

## Sheet: control y
fly1	fly2	fly3	fly4	fly5	fly6	fly7	fly8	fly9	fly10	fly11	fly12		Avg	SEM
0.000423607	0.000674906	-1.98912e-06	6.20601e-05	-2.83315e-06	0.00105811	-2.28323e-06	-1.11085e-06	4.72077e-06	0.00300492	-6.54789e-05	-1.40703e-06		0.000429435	0.00025494
0.000790634	0.00138274	-2.7252e-06	0.000113601	-3.44356e-07	0.00225933	-9.69724e-07	2.05852e-07	-4.66374e-05	0.00608033	-0.000119055	-3.34066e-06		0.000871147	0.000518846
0.00110928	0.00205992	-8.51872e-06	0.00018666	-7.14666e-06	0.00344847	-1.11921e-05	-5.30744e-06	-0.000131277	0.00901903	-0.000121452	-7.36094e-06		0.00129426	0.000772023
0.00146347	0.00277261	-9.74769e-06	0.000266674	-5.45636e-05	0.00466313	-7.60018e-06	-6.07454e-06	-0.000209026	0.012059	-0.000127573	-1.01247e-05		0.00173335	0.0010338
0.00189372	0.00357068	-2.25421e-05	0.000379778	-8.70858e-05	0.00590501	-2.74018e-05	-1.4779e-05	-0.000249404	0.0150293	-9.77524e-05	-9.41755e-06		0.00218918	0.00129041
0.00235689	0.00444883	5.17558e-05	0.000610041	-1.50745e-05	0.00724448	1.92443e-05	-2.10377e-05	-0.000131591	0.0180648	9.43934e-05	0.000104071		0.00273557	0.00154425
0.00286967	0.00540315	0.000345823	0.000965662	0.000210299	0.00869424	0.000280035	4.41727e-05	9.34148e-05	0.0214084	0.000605875	0.000417495		0.00344485	0.00180626
0.00356295	0.00652666	0.000978179	0.00169524	0.000614948	0.0103158	0.000873682	0.000283789	0.000596933	0.0251518	0.001597	0.00100812		0.00443376	0.00207328
0.00446036	0.00795724	0.00205938	0.00297063	0.00141381	0.0121299	0.00203903	0.00093283	0.00173109	0.0294159	0.00321589	0.0019296		0.00585464	0.00233789
0.00575775	0.00991708	0.00352369	0.00473149	0.00283381	0.0141577	0.0037706	0.00215099	0.00354258	0.0342887	0.00559498	0.00321247		0.00779015	0.00260429
0.007523	0.0124562	0.00557577	0.00717097	0.00501466	0.0166578	0.00608046	0.00400508	0.0061876	0.0398957	0.00883941	0.00503942		0.0103705	0.00287732
0.00976882	0.0156452	0.0083701	0.0104368	0.00805915	0.0198523	0.0090908	0.00661024	0.00985347	0.0464505	0.0132026	0.00746982		0.0137341	0.00316935
0.0127776	0.0197725	0.0119252	0.0146818	0.0119527	0.0238147	0.0129105	0.0100684	0.0147186	0.054132	0.0189299	0.010612		0.0180247	0.00349161
0.0166509	0.0249956	0.0167158	0.0201089	0.0168986	0.0285819	0.0177089	0.0144619	0.0209967	0.0631173	0.0261993	0.0144849		0.0234101	0.003849
0.0213847	0.0314253	0.0227921	0.026734	0.0230792	0.0342776	0.0234467	0.019842	0.0288979	0.0734952	0.0353077	0.0190642		0.0299789	0.00425691
0.0269415	0.0391181	0.0299177	0.0347263	0.030565	0.041045	0.0302198	0.0263029	0.0386097	0.0853406	0.0464003	0.0247047		0.0378243	0.00472738
0.0335482	0.0482243	0.038172	0.0441824	0.039459	0.0488974	0.0380437	0.0339484	0.0501144	0.0987878	0.0594509	0.0314885		0.0470264	0.00527045
0.0414488	0.0589557	0.0477081	0.0550175	0.049688	0.0578155	0.0467472	0.0429014	0.0636226	0.113721	0.0745186	0.039408		0.0576294	0.00588185
0.0507196	0.0714173	0.0585734	0.0672126	0.0612252	0.067873	0.0562836	0.0531751	0.079246	0.130236	0.0915411	0.0483837		0.0696572	0.0065762
0.0614987	0.0855736	0.0706915	0.0805867	0.0739943	0.0791343	0.0664768	0.0645835	0.0967468	0.148372	0.110365	0.0585671		0.0830492	0.00735607
0.0737123	0.101311	0.0842656	0.0950646	0.0878511	0.0916032	0.0773021	0.0770096	0.116164	0.167946	0.131073	0.0703699		0.0978061	0.00820672
0.0875562	0.118776	0.0991213	0.110686	0.102699	0.10515	0.0887549	0.0904152	0.137552	0.189119	0.153697	0.0834776		0.113917	0.00915317
0.103074	0.138025	0.115135	0.127363	0.118458	0.119549	0.100726	0.104695	0.160886	0.211767	0.177879	0.0976513		0.131267	0.0101938
0.120263	0.158869	0.132299	0.14505	0.13515	0.134798	0.113111	0.119733	0.186192	0.235704	0.203409	0.112602		0.149765	0.0113267
0.139251	0.181227	0.149919	0.163766	0.152677	0.150929	0.125827	0.135593	0.213234	0.261	0.230444	0.12816		0.169336	0.0125715
0.159505	0.205119	0.168003	0.183669	0.170969	0.167663	0.138857	0.152352	0.241801	0.287546	0.258899	0.14431		0.189891	0.0139289
0.181069	0.230422	0.186807	0.204642	0.18994	0.18474	0.151897	0.169979	0.271832	0.315299	0.28847	0.160542		0.211303	0.0154069
0.204507	0.257146	0.2061	0.226603	0.209321	0.202353	0.164973	0.188357	0.303418	0.344203	0.318968	0.177034		0.233582	0.0169945
0.229835	0.285123	0.225864	0.249802	0.229133	0.220817	0.178383	0.207241	0.336431	0.374017	0.350479	0.193869		0.256749	0.0186713
0.257002	0.31372	0.24625	0.274102	0.249489	0.240175	0.191955	0.226495	0.370506	0.404495	0.383166	0.211148		0.280709	0.0204198
0.285997	0.343098	0.267496	0.299607	0.270436	0.260431	0.205721	0.246243	0.405881	0.435803	0.416702	0.228936		0.305529	0.0222391
0.316283	0.373598	0.289624	0.326538	0.292175	0.28157	0.219788	0.266786	0.442665	0.468143	0.450887	0.246779		0.331236	0.0241441
0.347428	0.405226	0.312739	0.354696	0.314692	0.303531	0.234089	0.288277	0.48081	0.501347	0.486164	0.265024		0.357835	0.0261349
0.379595	0.438024	0.336884	0.384081	0.337996	0.326242	0.248682	0.310819	0.520005	0.535682	0.522699	0.283492		0.38535	0.028217
0.412329	0.471895	0.362085	0.414674	0.362185	0.349714	0.263549	0.334625	0.559719	0.571265	0.560277	0.302087		0.4137	0.0303628
0.445607	0.506874	0.388755	0.446314	0.387095	0.374006	0.278737	0.359781	0.600293	0.607513	0.598721	0.321213		0.442909	0.0325344
0.480151	0.542644	0.416893	0.478858	0.412503	0.399317	0.294449	0.386021	0.641705	0.644433	0.637834	0.340968		0.472981	0.0347144
0.515557	0.579272	0.446583	0.512341	0.438248	0.425778	0.310924	0.412674	0.683994	0.682334	0.677877	0.361669		0.503938	0.0369191
0.550724	0.61657	0.478059	0.546904	0.464374	0.452839	0.328119	0.439639	0.727329	0.721271	0.719014	0.38299		0.535653	0.039174
0.585158	0.654363	0.510826	0.582473	0.490897	0.480028	0.345906	0.467536	0.771775	0.761408	0.760724	0.40477		0.567989	0.0414739
0.619088	0.69369	0.544596	0.618929	0.517947	0.507201	0.364441	0.496815	0.817309	0.802747	0.803076	0.426434		0.601023	0.043843
0.652788	0.734421	0.579161	0.656203	0.545709	0.534361	0.383687	0.52756	0.862819	0.845136	0.846702	0.44746		0.634667	0.0462714
0.68669	0.77611	0.614243	0.694317	0.573985	0.561768	0.403627	0.559494	0.908437	0.888491	0.891473	0.468183		0.668901	0.0487491
0.721001	0.818751	0.650029	0.733159	0.602794	0.589525	0.424375	0.592523	0.954375	0.932709	0.936551	0.488135		0.703661	0.0512611
0.755688	0.86198	0.686446	0.772393	0.632159	0.61765	0.445916	0.626674	1.00047	0.977491	0.981709	0.507731		0.738859	0.0537654
0.790845	0.905835	0.723489	0.812036	0.661916	0.646117	0.468205	0.661713	1.04741	1.02283	1.02742	0.527431		0.774604	0.056299
0.826006	0.950425	0.76127	0.852485	0.692252	0.675047	0.491137	0.697549	1.0951	1.06909	1.0738	0.547002		0.81093	0.0588853
0.860944	0.995988	0.79983	0.893949	0.723534	0.704405	0.514793	0.73436	1.14367	1.11603	1.12086	0.566836		0.847933	0.0615037
0.896235	1.04257	0.83896	0.936362	0.755936	0.734164	0.539275	0.772724	1.19284	1.16337	1.16848	0.586636		0.88563	0.0641309
0.932851	1.0902	0.878376	0.979315	0.789417	0.764523	0.56439	0.812747	1.24224	1.21112	1.21675	0.606125		0.924004	0.0667731
0.971259	1.13868	0.918594	1.02254	0.824047	0.795307	0.590003	0.853707	1.29152	1.25933	1.26592	0.625663		0.963048	0.0694266
1.01094	1.18747	0.959677	1.06642	0.859573	0.826807	0.616221	0.895177	1.34038	1.3081	1.31559	0.645609		1.00266	0.072047
1.05122	1.23666	1.00163	1.11113	0.895686	0.85919	0.643043	0.936606	1.38989	1.35722	1.36543	0.665931		1.0428	0.0746662
1.09232	1.286	1.04474	1.1565	0.932502	0.891888	0.670368	0.97766	1.44006	1.40663	1.41564	0.68667		1.08341	0.0772956
1.13439	1.33528	1.0886	1.20268	0.969961	0.924761	0.698242	1.01868	1.49038	1.45647	1.46649	0.708188		1.12451	0.0799119
1.17607	1.38507	1.13332	1.25002	1.00817	0.957904	0.726649	1.05971	1.54087	1.50671	1.5178	0.730103		1.16603	0.082533
1.21739	1.43511	1.17888	1.29822	1.0472	0.991187	0.755603	1.10075	1.59129	1.55737	1.56928	0.752581		1.20791	0.0851284
1.25973	1.48509	1.22478	1.34635	1.08684	1.02461	0.785208	1.14177	1.64143	1.60853	1.62076	0.776073		1.2501	0.0876585
1.30325	1.53526	1.27114	1.39424	1.12693	1.05831	0.815401	1.18292	1.6914	1.6601	1.67198	0.800123		1.29259	0.0901358
1.34753	1.58496	1.31838	1.44217	1.16735	1.09216	0.846064	1.22448	1.74151	1.71196	1.72301	0.824561		1.33535	0.0925726
1.39167	1.63459	1.3667	1.49063	1.20797	1.12626	0.87732	1.26647	1.79144	1.76418	1.7735	0.849179		1.37832	0.0949631
1.43564	1.685	1.41575	1.53958	1.24855	1.16086	0.909281	1.30908	1.84146	1.81671	1.82325	0.873993		1.4216	0.0973194
1.47977	1.7355	1.46511	1.58865	1.289	1.1957	0.941798	1.3523	1.89216	1.86927	1.87275	0.899596		1.46513	0.0996379
1.52429	1.7856	1.51479	1.63786	1.32923	1.2305	0.974859	1.3962	1.94293	1.92182	1.92214	0.925811		1.50884	0.101906
1.56904	1.83581	1.56486	1.68673	1.36933	1.26529	1.00865	1.44057	1.99339	1.97461	1.97108	0.952071		1.55262	0.104132
1.61328	1.88654	1.61543	1.73474	1.40972	1.3004	1.04315	1.48471	2.04424	2.02738	2.01954	0.978198		1.59644	0.106334
1.65799	1.93755	1.66668	1.78197	1.45025	1.33611	1.07811	1.52858	2.09592	2.07983	2.06811	1.00464		1.64048	0.108519
1.70328	1.98939	1.71809	1.82886	1.49089	1.37237	1.11345	1.57226	2.14798	2.1321	2.11642	1.03181		1.68474	0.110666
1.74814	2.04212	1.76951	1.87578	1.53193	1.40904	1.14926	1.61587	2.2006	2.18408	2.16442	1.05891		1.72914	0.112809
1.79233	2.09417	1.82129	1.92299	1.57328	1.44603	1.18551	1.65949	2.25346	2.23606	2.21294	1.08523		1.77356	0.114977
1.83576	2.14604	1.87306	1.9707	1.6151	1.48343	1.22236	1.70303	2.30587	2.28841	2.26181	1.11145		1.81808	0.117127
1.87919	2.19872	1.92455	2.01867	1.65768	1.52137	1.25989	1.74633	2.35814	2.34105	2.31126	1.13816		1.86292	0.119254
1.92222	2.25192	1.97633	2.06711	1.70105	1.55994	1.2979	1.78936	2.41039	2.39397	2.36126	1.16447		1.90799	0.121405
1.96462	2.30579	2.02863	2.11571	1.74524	1.59873	1.33637	1.83206	2.46271	2.44711	2.41135	1.18965		1.95316	0.123616
2.00727	2.3598	2.08109	2.16373	1.79	1.63765	1.3753	1.87404	2.51529	2.50066	2.46167	1.21441		1.99841	0.125856
2.05003	2.41329	2.13351	2.21183	1.83478	1.67668	1.4146	1.91543	2.56775	2.5545	2.51242	1.23896		2.04365	0.12811
2.09289	2.46676	2.18571	2.26062	1.87965	1.71547	1.45422	1.95699	2.61979	2.60844	2.56339	1.26322		2.08893	0.130377
2.13533	2.52098	2.23772	2.30964	1.92493	1.7541	1.49436	1.99893	2.67161	2.66288	2.61404	1.2878		2.13436	0.132631
2.17709	2.57578	2.29045	2.35895	1.9705	1.79232	1.53519	2.04115	2.72366	2.71762	2.66493	1.31228		2.17999	0.134919
2.21881	2.6307	2.34431	2.4089	2.01628	1.82978	1.57646	2.08362	2.77575	2.77232	2.71634	1.3364		2.22581	0.137261
2.2606	2.68709	2.39881	2.45924	2.06221	1.86693	1.61783	2.12596	2.82765	2.82724	2.76778	1.36108		2.27187	0.13963
2.30248	2.7448	2.45375	2.50929	2.10832	1.90429	1.65888	2.16793	2.87988	2.88211	2.81897	1.38583		2.31804	0.142046
2.34456	2.80134	2.50865	2.55841	2.15453	1.94173	1.69954	2.20992	2.93257	2.93658	2.86969	1.41025		2.36398	0.14445
2.38724	2.8569	2.56296	2.60662	2.20086	1.97926	1.7404	2.25195	2.98534	2.99108	2.9205	1.4359		2.40992	0.14676
2.43049	2.91223	2.61738	2.65437	2.24732	2.01706	1.78151	2.29394	3.03804	3.04594	2.97144	1.46283		2.45604	0.148999
2.47393	2.9681	2.67224	2.70208	2.29391	2.05503	1.82259	2.33648	3.09098	3.10091	3.02201	1.48968		2.50233	0.151255
2.51762	3.02494	2.72649	2.75012	2.34092	2.09364	1.8637	2.37974	3.14418	3.15605	3.0724	1.51675		2.54888	0.15351
2.56214	3.08114	2.77973	2.79851	2.38806	2.13307	1.90483	2.42315	3.19739	3.2117	3.12315	1.54462		2.59563	0.155711
2.60856	3.13593	2.83253	2.84744	2.43538	2.17294	1.94587	2.46668	3.25062	3.26772	3.17432	1.57235		2.64253	0.1579
2.65634	3.18921	2.88492	2.89679	2.48306	2.21342	1.98678	2.5104	3.30367	3.32405	3.22547	1.6		2.68951	0.160049
2.7044	3.24206	2.93651	2.94586	2.53088	2.25463	2.02761	2.55398	3.3566	3.38113	3.27647	1.62861		2.73656	0.162132
2.75338	3.2947	2.98739	2.99406	2.57878	2.29622	2.06873	2.59743	3.40951	3.43831	3.32668	1.65745		2.78355	0.164149
2.80315	3.34677	3.03849	3.04208	2.62659	2.338	2.11068	2.64086	3.46195	3.49504	3.37622	1.68613		2.8305	0.166088
2.85355	3.39975	3.09047	3.09079	2.67456	2.37984	2.15342	2.68408	3.51393	3.5517	3.42522	1.71467		2.87767	0.16802
2.90417	3.45351	3.14317	3.13978	2.72264	2.42142	2.19635	2.72719	3.56586	3.60822	3.47313	1.74243		2.92482	0.169993
2.95378	3.50823	3.19595	3.18909	2.77084	2.46267	2.23954	2.77016	3.61772	3.66498	3.52089	1.76981		2.97197	0.17202
3.00317	3.5641	3.24873	3.23861	2.81939	2.504	2.28337	2.81288	3.66949	3.7218	3.56901	1.79708		3.0193	0.174073
3.05262	3.621	3.30275	3.28766	2.8678	2.54554	2.32751	2.85551	3.72146	3.77799	3.61689	1.82449		3.06677	0.176125
3.10163	3.6797	3.3583	3.33643	2.91574	2.58718	2.37197	2.89792	3.77364	3.83377	3.66456	1.85231		3.11443	0.178198
3.15059	3.73952	3.41443	3.38492	2.96311	2.62908	2.41711	2.94014	3.82559	3.88931	3.71246	1.88022		3.16221	0.180278
3.20014	3.79973	3.47082	3.43289	3.0098	2.67139	2.46278	2.98188	3.87715	3.94489	3.76051	1.90811		3.21001	0.182352
3.25069	3.86029	3.52733	3.48078	3.05554	2.71387	2.50879	3.02304	3.92847	4.00021	3.80805	1.93572		3.25773	0.184431
3.30141	3.9219	3.58386	3.52884	3.10049	2.75601	2.55456	3.06405	3.97994	4.05551	3.85563	1.96331		3.30546	0.186576
3.35239	3.98485	3.64028	3.57666	3.14501	2.79753	2.59989	3.10479	4.03175	4.11175	3.90407	1.99131		3.35336	0.188829
3.40374	4.04813	3.69618	3.62397	3.18924	2.83891	2.64521	3.14494	4.08346	4.16857	3.95336	2.01975		3.40129	0.191111
3.45565	4.11113	3.75163	3.67093	3.23367	2.8807	2.69061	3.18435	4.13485	4.22539	4.003	2.04867		3.44922	0.193352
3.50884	4.17336	3.80704	3.71775	3.27796	2.92307	2.73564	3.22343	4.18616	4.28201	4.05179	2.07791		3.49708	0.19554
3.56193	4.23485	3.86224	3.76457	3.32206	2.96595	2.77988	3.2623	4.23731	4.33881	4.09989	2.10802		3.54482	0.197669
3.61544	4.29633	3.91705	3.81141	3.36636	3.00893	2.82397	3.30092	4.28801	4.3962	4.14822	2.13845		3.59261	0.199796
3.67027	4.35819	3.97141	3.85793	3.41069	3.05187	2.86832	3.33944	4.33839	4.45384	4.1965	2.1679		3.6404	0.201982
3.7253	4.42094	4.02517	3.90403	3.45524	3.09463	2.91263	3.37745	4.38891	4.51155	4.24379	2.19683		3.68804	0.204214
3.77997	4.48513	4.07875	3.94997	3.50033	3.13698	2.95684	3.41541	4.43965	4.56931	4.29006	2.22596		3.7357	0.206474
3.83446	4.55024	4.13274	3.99592	3.54653	3.17951	3.00119	3.45332	4.49028	4.62731	4.33637	2.25547		3.78361	0.208742
3.88973	4.61546	4.18652	4.04191	3.5937	3.22269	3.0462	3.49035	4.54064	4.6855	4.38275	2.28509		3.83171	0.210987
3.9459	4.68069	4.23966	4.08768	3.64062	3.2664	3.09174	3.52661	4.59046	4.74373	4.42852	2.31481		3.87973	0.213191
4.0022	4.7463	4.29293	4.13337	3.68674	3.31039	3.13742	3.56269	4.63989	4.80215	4.47398	2.34471		3.92773	0.2154
4.05806	4.81293	4.34621	4.17912	3.73234	3.3545	3.18307	3.59918	4.68946	4.86087	4.51978	2.37437		3.97582	0.217681
4.11326	4.88076	4.39918	4.22457	3.77795	3.39854	3.22891	3.63607	4.73888	4.9198	4.56608	2.40411		4.02401	0.22
4.16757	4.94853	4.45173	4.26961	3.82335	3.44211	3.27552	3.67326	4.78806	4.97854	4.61263	2.43364		4.07205	0.22231
4.22105	5.0146	4.50373	4.31405	3.86841	3.48537	3.32232	3.71083	4.83732	5.03713	4.65911	2.46284		4.11973	0.224582
4.27371	5.07898	4.55574	4.35786	3.91329	3.52859	3.36861	3.74864	4.88621	5.09594	4.70549	2.4928		4.16716	0.226771
4.32523	5.14264	4.60779	4.40137	3.95755	3.5718	3.41466	3.78712	4.93447	5.15492	4.75248	2.52338		4.21445	0.228911
4.37707	5.20574	4.65924	4.44443	4.00126	3.61515	3.46051	3.82589	4.98222	5.21342	4.80013	2.55358		4.26156	0.231041
4.42912	5.2677	4.70971	4.48662	4.04434	3.65845	3.50619	3.86455	5.02948	5.2713	4.84786	2.58331		4.30822	0.233135
4.47996	5.32854	4.75935	4.52798	4.08689	3.70127	3.5518	3.90371	5.07656	5.32911	4.89542	2.6133		4.35449	0.235166
4.53016	5.38829	4.80811	4.56876	4.13012	3.74342	3.59699	3.9433	5.12386	5.38649	4.94305	2.64349		4.4005	0.237146
4.57998	5.44708	4.85566	4.60888	4.17384	3.7851	3.64165	3.98311	5.1713	5.44336	4.99077	2.67321		4.44616	0.23911
4.62992	5.50517	4.90204	4.64819	4.21688	3.82657	3.68604	4.0229	5.2181	5.4999	5.03842	2.7028		4.49141	0.241037
4.68093	5.56246	4.94716	4.68639	4.25886	3.868	3.7298	4.0626	5.26413	5.55581	5.08593	2.73246		4.53621	0.242911
4.73336	5.62037	4.99102	4.72324	4.30002	3.90971	3.77286	4.10197	5.30975	5.61158	5.13275	2.76251		4.58076	0.244771
4.7859	5.67968	5.03347	4.75914	4.34052	3.95128	3.81571	4.14048	5.35499	5.66736	5.1789	2.79296		4.62503	0.246647
4.83829	5.73921	5.07386	4.79428	4.38047	3.9925	3.85867	4.17835	5.39984	5.72288	5.22487	2.82298		4.66885	0.248533
4.89197	5.79821	5.11184	4.82821	4.41998	4.03352	3.9015	4.21551	5.44426	5.77798	5.27066	2.85236		4.71217	0.250416
4.945	5.85675	5.14755	4.86051	4.45893	4.07414	3.94422	4.25256	5.48839	5.83237	5.31632	2.88097		4.75481	0.252291
4.99696	5.91532	5.18137	4.89159	4.4978	4.11427	3.98681	4.29023	5.53199	5.88638	5.36206	2.90852		4.79694	0.254189
5.04935	5.97346	5.21343	4.92165	4.5367	4.15423	4.02896	4.3281	5.57492	5.94005	5.40806	2.93475		4.83864	0.256132
5.10158	6.03149	5.24352	4.95044	4.57534	4.19452	4.07089	4.36633	5.61744	5.99353	5.45414	2.95984		4.87992	0.258107
5.15377	6.0895	5.2716	4.97785	4.61399	4.23484	4.11273	4.40454	5.65968	6.04711	5.50017	2.98427		4.92084	0.260113
5.2054	6.14711	5.29787	5.00352	4.65249	4.27452	4.15466	4.44231	5.70177	6.10085	5.54605	3.00797		4.96121	0.262161
5.25632	6.20442	5.32244	5.02782	4.69103	4.31364	4.1971	4.48007	5.74359	6.15489	5.59161	3.03088		5.00115	0.264242
5.30696	6.25974	5.34563	5.05146	4.73007	4.3525	4.23953	4.51824	5.78496	6.20868	5.63725	3.05292		5.04066	0.266291
5.35677	6.31294	5.3676	5.07438	4.76964	4.39125	4.28118	4.55713	5.82585	6.26205	5.68315	3.07452		5.0797	0.268285
5.40627	6.36527	5.38848	5.09633	4.80982	4.42947	4.32193	4.59651	5.86626	6.3151	5.72883	3.09609		5.11836	0.270259
5.45572	6.4165	5.40889	5.11756	4.8507	4.46738	4.36215	4.6362	5.90597	6.36778	5.77423	3.11725		5.15669	0.272217
5.50549	6.46667	5.42905	5.13862	4.89202	4.50545	4.40199	4.676	5.94495	6.42095	5.81942	3.13773		5.19486	0.274202
5.55591	6.51629	5.44904	5.15904	4.93325	4.54355	4.44151	4.71581	5.98368	6.47422	5.8641	3.15797		5.23286	0.27621
5.60561	6.56578	5.46899	5.17859	4.9744	4.58161	4.48101	4.75594	6.02193	6.52683	5.90814	3.17812		5.27058	0.278196
5.65347	6.61509	5.48898	5.19779	5.01528	4.61948	4.52064	4.79601	6.05959	6.5791	5.95117	3.19807		5.30789	0.28016
5.70058	6.66397	5.5091	5.21673	5.05566	4.65724	4.56032	4.83572	6.0968	6.63086	5.99281	3.21807		5.34482	0.282084
5.74872	6.71173	5.52934	5.2358	5.0962	4.69528	4.59977	4.87503	6.13354	6.68198	6.03356	3.23764		5.38155	0.283985
5.797	6.75869	5.54994	5.25503	5.13688	4.73355	4.63854	4.91365	6.16981	6.73281	6.07375	3.25656		5.41802	0.28591
5.84528	6.80647	5.5708	5.27396	5.17743	4.77163	4.67685	4.9518	6.20512	6.78327	6.11319	3.27493		5.45423	0.287895
5.89498	6.85494	5.59172	5.29255	5.21787	4.80944	4.71543	4.9895	6.2396	6.83336	6.15172	3.29227		5.49028	0.289964
5.94496	6.90356	5.61322	5.31074	5.25766	4.84708	4.7544	5.02682	6.27386	6.88361	6.18941	3.30881		5.52618	0.292107
5.99457	6.95245	5.63511	5.32835	5.29664	4.88423	4.7934	5.06361	6.30819	6.93425	6.2263	3.32527		5.56186	0.294308
6.04439	7.0013	5.65709	5.34533	5.33517	4.92065	4.83225	5.09907	6.34259	6.98516	6.26248	3.34207		5.59729	0.296551
6.0944	7.05	5.67914	5.36199	5.37306	4.95668	4.87102	5.1336	6.37684	7.03653	6.29825	3.35889		5.63253	0.298845
6.14536	7.09865	5.70132	5.37841	5.40996	4.99247	4.90961	5.16737	6.41094	7.08853	6.33388	3.37564		5.66768	0.301216
6.19792	7.14669	5.72384	5.39444	5.44604	5.02789	4.94791	5.20045	6.44472	7.14094	6.36982	3.39231		5.70275	0.303654
6.25111	7.19387	5.7466	5.41034	5.48184	5.06307	4.98603	5.23378	6.47833	7.19366	6.40637	3.40847		5.73779	0.306144
6.30406	7.24042	5.76959	5.42613	5.51791	5.09805	5.02416	5.26732	6.51194	7.24671	6.44318	3.42479		5.77285	0.308637
6.35727	7.28634	5.79244	5.44173	5.55429	5.13265	5.06265	5.30112	6.5456	7.30012	6.48008	3.44146		5.80798	0.311122
6.41007	7.33212	5.81517	5.4573	5.59079	5.16697	5.10143	5.33526	6.57972	7.35427	6.51749	3.45768		5.84319	0.313682
6.46185	7.37799	5.83833	5.47294	5.62718	5.20105	5.14019	5.3696	6.61386	7.40898	6.55565	3.47337		5.87842	0.316316
6.51357	7.42355	5.8617	5.48891	5.66357	5.23496	5.17902	5.40411	6.64745	7.46365	6.59443	3.48878		5.91364	0.318968
6.56528	7.46903	5.88522	5.50528	5.70015	5.269	5.21791	5.43912	6.6807	7.51808	6.63339	3.50394		5.94893	0.321622
6.61651	7.51437	5.9089	5.52188	5.73681	5.30341	5.25688	5.47542	6.71382	7.57206	6.67238	3.5189		5.98428	0.324249
6.66699	7.55901	5.93221	5.53874	5.77366	5.33794	5.29573	5.51247	6.74679	7.6259	6.71153	3.53364		6.01955	0.326852
6.71715	7.60303	5.95499	5.55576	5.81091	5.37246	5.33444	5.54987	6.77966	7.67969	6.75017	3.54842		6.05471	0.329426
6.7673	7.64714	5.97737	5.57283	5.84876	5.40716	5.37316	5.58804	6.81257	7.73339	6.78811	3.56344		6.08994	0.331977
6.81681	7.69194	5.99961	5.58988	5.88665	5.4419	5.41166	5.62656	6.84521	7.787	6.82592	3.57842		6.12513	0.334551
6.86583	7.73736	6.02183	5.60698	5.92384	5.47665	5.45001	5.66507	6.87725	7.84018	6.86405	3.59344		6.16021	0.337137
6.91455	7.783	6.04422	5.62419	5.96055	5.51134	5.48835	5.70326	6.90893	7.893	6.90284	3.60882		6.19526	0.339717
6.96362	7.82863	6.06679	5.64143	5.99681	5.54576	5.52671	5.7413	6.94048	7.94518	6.94186	3.62526		6.23032	0.34224
7.01313	7.87443	6.08907	5.65873	6.0328	5.58019	5.56495	5.7797	6.97231	7.99661	6.98067	3.64271		6.26544	0.344703
7.06194	7.92053	6.11119	5.67604	6.06907	5.61485	5.6027	5.81845	7.0046	8.04781	7.01965	3.66028		6.30059	0.347173
7.11056	7.96673	6.13331	5.69345	6.10547	5.64952	5.64028	5.8575	7.037	8.09904	7.05898	3.67799		6.33582	0.349654
7.15963	8.01284	6.15549	5.71109	6.14164	5.68405	5.67793	5.89637	7.06931	8.15053	7.09868	3.69598		6.37113	0.35215
7.20913	8.05899	6.17813	5.72895	6.17722	5.71853	5.71551	5.93521	7.10162	8.20227	7.13866	3.7143		6.40655	0.354661
7.25852	8.10525	6.20109	5.74713	6.21162	5.7529	5.7532	5.97435	7.13376	8.25415	7.17907	3.73278		6.44198	0.357184
7.30726	8.1515	6.22389	5.76548	6.24439	5.78699	5.79095	6.01302	7.16558	8.30619	7.22009	3.7514		6.47723	0.359724
7.35638	8.19794	6.24631	5.78406	6.27621	5.82078	5.82865	6.05123	7.19747	8.3586	7.26139	3.7703		6.51244	0.362303
7.40595	8.24461	6.26849	5.80304	6.30768	5.85433	5.86635	6.08998	7.22977	8.41098	7.30251	3.78875		6.5477	0.364933
7.45565	8.29075	6.29065	5.8223	6.3385	5.88766	5.90396	6.12949	7.26235	8.46283	7.34304	3.80673		6.58283	0.367555
7.50519	8.33634	6.31292	5.84181	6.36877	5.92096	5.94149	6.1691	7.29474	8.51492	7.38323	3.82426		6.61781	0.37019
7.55438	8.38209	6.33546	5.86156	6.39853	5.95432	5.97922	6.20865	7.32696	8.56764	7.42349	3.84144		6.65281	0.372871
7.604	8.42759	6.35805	5.88147	6.42764	5.98759	6.01713	6.24816	7.3592	8.62021	7.46369	3.85893		6.6878	0.375538
7.65346	8.4728	6.38061	5.90144	6.45634	6.02077	6.05494	6.28775	7.39145	8.67222	7.504	3.87649		6.72269	0.378179
7.70227	8.51832	6.40318	5.92143	6.48511	6.05368	6.0927	6.32782	7.42375	8.72361	7.54403	3.89397		6.75749	0.380805
7.75099	8.5638	6.42559	5.9415	6.51437	6.08637	6.13052	6.36802	7.456	8.77452	7.58369	3.91182		6.79227	0.383389
7.80005	8.60871	6.44814	5.96179	6.54463	6.11915	6.16822	6.40825	7.48843	8.82553	7.62373	3.93032		6.82725	0.385934
7.84939	8.65283	6.47119	5.98236	6.57625	6.15177	6.20568	6.44916	7.52111	8.87613	7.66378	3.94938		6.86242	0.388403
7.89784	8.6961	6.49474	6.0031	6.60891	6.18427	6.24311	6.49081	7.5539	8.92603	7.70375	3.96925		6.89765	0.390744
7.94511	8.73892	6.51842	6.0238	6.64209	6.21673	6.28016	6.53218	7.58667	8.97618	7.74395	3.98982		6.93283	0.393032
7.99197	8.78216	6.54211	6.0446	6.67588	6.24938	6.31669	6.57305	7.61957	9.02719	7.78464	4.01045		6.96814	0.395376
8.03913	8.82513	6.56587	6.0656	6.71027	6.2823	6.35292	6.61393	7.65283	9.07847	7.82572	4.03167		7.00365	0.397703
8.08688	8.86678	6.58934	6.0867	6.74529	6.31497	6.38864	6.65485	7.68602	9.1293	7.86655	4.05397		7.03911	0.399925
8.1349	8.90834	6.61266	6.10827	6.78072	6.34759	6.42433	6.69629	7.71929	9.18069	7.90742	4.07671		7.07477	0.402144
8.18292	8.94971	6.63594	6.13017	6.81564	6.38002	6.45978	6.73772	7.75226	9.23275	7.94802	4.09951		7.11037	0.404382
8.23174	8.99092	6.65938	6.15251	6.85024	6.41268	6.49523	6.77931	7.78515	9.28579	7.98909	4.12294		7.14625	0.406635
8.2804	9.03249	6.68291	6.17517	6.88442	6.44532	6.53061	6.82113	7.81822	9.3391	8.03058	4.14617		7.18221	0.408931
8.32851	9.07479	6.70648	6.19792	6.91834	6.47761	6.56571	6.86329	7.85131	9.392	8.07198	4.16866		7.21805	0.411276
8.37742	9.11831	6.73025	6.22106	6.95248	6.51021	6.6011	6.90626	7.88485	9.4459	8.11402	4.1915		7.25445	0.413698
8.42686	9.16129	6.75345	6.24399	6.98606	6.54234	6.63607	6.94871	7.91786	9.49992	8.1556	4.21451		7.29056	0.416129
8.47781	9.20475	6.77689	6.26729	7.02019	6.57473	6.67192	6.99242	7.95126	9.55461	8.19775	4.23847		7.32734	0.418567
8.52847	9.24791	6.80018	6.29029	7.05403	6.60644	6.70776	7.03664	7.98424	9.60801	8.23945	4.26269		7.36384	0.420934
8.5795	9.29207	6.82333	6.31331	7.08808	6.63804	6.74372	7.08142	8.01724	9.66159	8.28095	4.28686		7.40051	0.423353
8.63079	9.3375	6.8463	6.33642	7.1219	6.67005	6.78004	7.12613	8.05076	9.71594	8.32257	4.31122		7.43747	0.425851
8.68079	9.38181	6.8685	6.35867	7.15411	6.70132	6.81549	7.16917	8.0835	9.76876	8.36323	4.33562		7.47341	0.428264
8.73235	9.42822	6.8914	6.38204	7.18773	6.73404	6.85253	7.21425	8.11788	9.82395	8.40587	4.36181		7.51101	0.430749
8.77991	9.47195	6.91291	6.4043	7.2197	6.76483	6.8875	7.25701	8.15057	9.87609	8.44621	4.38683		7.54648	0.433061
8.82977	9.51794	6.9356	6.42771	7.25355	6.79719	6.92427	7.30214	8.18508	9.9311	8.48875	4.4139		7.58392	0.435461
8.87853	9.56242	6.95754	6.45044	7.28659	6.82876	6.96014	7.34592	8.21866	9.9848	8.5302	4.441		7.62042	0.437768
8.92449	9.60432	6.97822	6.47191	7.31779	6.8587	6.99416	7.38718	8.25044	10.0353	8.56953	4.46675		7.6549	0.43993
8.97965	9.6561	7.00323	6.49804	7.35498	6.89501	7.03498	7.43719	8.28918	10.0959	8.61705	4.49736		7.69656	0.442597
9.01365	9.68853	7.01868	6.51428	7.37777	6.91751	7.06011	7.46814	8.31324	10.1334	8.64639	4.51617		7.72232	0.44427
