# Supplementary material for: How spatial release from masking may fail to function in a highly directional auditory system
Source: eLife. 2017 Apr 25;6:e20731. doi: 10.7554/eLife.20731 (PMC5443663; doi:10.7554/eLife.20731)
Supplement: Figure 5—source data 2. — The target signal was presented at 76 dB SPL from a forward speaker while the masker was presented at the same intensity from an adjacent speaker to the right. ‘X’ and ‘Y’ coordinates of virtual walking paths measured from the treadmill system. Data plotted in Figure 5B. DOI: http://dx.doi.org/10.7554/eLife.20731.018 [file elife-20731-fig5-data2.xlsx]

## Sheet: noise plus 10 x
fly1	fly2	fly3	fly4	fly5	fly6	fly7	fly8	fly9	fly10	fly11	fly12		Avg	SEM
-1.05316e-08	-0.000135324	-9.03831e-07	0.000207105	-9.92169e-08	6.59836e-07	2.51187e-08	-1.03219e-07	6.16225e-09	8.00697e-08	-0.000205044	0.000134258		5.41809e-08	3.03108e-05
1.48989e-07	-0.000129048	1.46991e-06	0.000388921	7.65723e-09	-6.21392e-07	-2.60763e-07	3.35493e-07	1.05443e-08	-4.01871e-08	-0.000398577	0.000182575		3.74351e-06	5.22193e-05
-3.12969e-07	-0.000128629	-1.76495e-06	0.000544295	1.27278e-07	3.49065e-07	4.87268e-07	-5.51999e-07	-3.12975e-08	-3.14081e-08	-0.000501452	0.000214663		1.05957e-05	6.79234e-05
4.35482e-07	-0.000133905	1.83843e-06	0.000684551	-2.78232e-07	1.48388e-07	-6.43472e-07	6.71489e-07	5.01763e-08	1.23652e-07	-0.000502268	0.000215437		2.21801e-05	7.68374e-05
-4.52093e-07	-0.000126495	-1.7824e-06	0.000809914	3.99293e-07	-8.211e-07	6.46345e-07	-6.32187e-07	-5.83318e-08	-2.12455e-07	-0.000506423	0.000208823		3.19089e-05	8.52723e-05
2.11809e-07	-0.000135396	-8.9125e-07	0.000923921	-4.32377e-07	1.47666e-06	-5.85891e-07	3.67878e-07	4.80101e-08	2.65431e-07	-0.000469561	0.00022292		4.51954e-05	9.2016e-05
2.24138e-07	-0.000125538	7.28384e-07	0.001039	3.25612e-07	-2.02084e-06	3.42221e-07	9.02869e-08	-1.51975e-08	-2.48051e-07	-0.000403386	0.000240299		6.2483e-05	9.80449e-05
1.63415e-07	-0.000135285	-4.70546e-06	0.00115086	-5.42098e-08	2.0384e-06	8.20402e-07	-9.16889e-07	-3.75211e-08	1.30087e-07	-0.000313126	0.000226275		7.71799e-05	0.000103739
1.84752e-06	-0.000122122	6.35144e-06	0.00119219	-3.59185e-07	-8.15475e-07	-3.99112e-07	1.94041e-06	7.69166e-08	6.19404e-08	-0.00018672	0.000147448		8.66249e-05	0.00010309
-2.40946e-07	-3.13936e-05	-1.14485e-05	0.00118366	7.82461e-07	1.14869e-06	3.7855e-06	-1.87208e-06	-1.05519e-07	-3.16001e-07	-8.16761e-05	6.41923e-05		9.38762e-05	9.95148e-05
1.93387e-06	5.60262e-05	7.67675e-05	0.0011885	-1.10131e-06	4.08338e-06	-9.27412e-07	3.2447e-06	7.56725e-08	5.11037e-07	4.35003e-05	-9.65148e-05		0.000106341	9.91287e-05
2.50298e-06	9.7136e-05	0.000267869	0.00118732	1.09601e-06	-8.85526e-07	9.02672e-06	7.69834e-07	-1.7217e-07	-7.67831e-07	0.000143734	-0.000345113		0.000113543	0.000105747
-2.25089e-05	0.000106301	0.000361066	0.00118637	-9.91855e-07	1.3741e-05	-1.57212e-05	4.28282e-06	3.40216e-07	1.07476e-06	0.000187971	-0.00055557		0.000105529	0.000115485
-0.000136246	9.85576e-05	0.0003234	0.00119276	8.00014e-07	-1.74516e-05	-0.000114725	1.27013e-05	3.26124e-07	2.24069e-07	0.00012887	-0.000855008		5.28504e-05	0.000131521
-0.000292991	0.000113143	0.000174347	0.00112352	1.29998e-06	-0.000105024	-0.000240681	-3.48556e-05	1.36075e-06	1.90489e-06	2.9914e-05	-0.00136847		-4.97108e-05	0.000158245
-0.000355474	9.31781e-05	8.55473e-05	0.000936886	1.1541e-06	-0.00031847	-0.000442985	-0.000134503	2.61311e-06	2.95138e-06	-2.66249e-05	-0.00208511		-0.000186736	0.000199732
-0.000363952	-8.29225e-05	-3.57234e-05	0.000695016	6.60747e-06	-0.000635146	-0.000746101	-0.000290364	2.79407e-06	2.92567e-06	-0.000200502	-0.00309038		-0.000394813	0.000266689
-0.000409596	-0.000390865	-0.000377417	0.000447528	1.31e-06	-0.00104515	-0.00114204	-0.000599939	8.85289e-06	7.24327e-06	-0.000335776	-0.00463665		-0.000706042	0.000379885
-0.000523041	-0.000788651	-0.00101212	0.000156156	1.67968e-05	-0.00172336	-0.00164542	-0.00131117	-2.55119e-05	-5.48987e-05	-0.000521339	-0.00693765		-0.00119752	0.000554179
-0.000601968	-0.00141139	-0.00205337	-0.000296598	-6.24983e-05	-0.00254203	-0.00226473	-0.00239063	-0.000142096	-0.000214411	-0.00093002	-0.00984393		-0.00189614	0.000771944
-0.000616866	-0.00238387	-0.00336718	-0.000950896	-0.000281584	-0.00362885	-0.00294815	-0.00374652	-0.000337634	-0.000470923	-0.0014077	-0.013345		-0.00279043	0.00103445
-0.000578404	-0.00367017	-0.00508203	-0.00175011	-0.000623094	-0.00513121	-0.00370924	-0.00553369	-0.000675992	-0.000805936	-0.00206806	-0.0175791		-0.00393392	0.00135538
-0.000321695	-0.00531584	-0.0071953	-0.00278955	-0.00120443	-0.00701867	-0.00474474	-0.00765508	-0.00115799	-0.00120842	-0.00288892	-0.0224649		-0.00533046	0.00172897
8.69151e-05	-0.00729488	-0.0095292	-0.00424852	-0.0018464	-0.0094189	-0.00599406	-0.0101045	-0.00172635	-0.00174555	-0.00400312	-0.0281587		-0.00699861	0.00216626
0.000535457	-0.00958427	-0.0121251	-0.00605398	-0.00259808	-0.012214	-0.00737988	-0.0128582	-0.00246176	-0.00239026	-0.00551565	-0.0346396		-0.00894045	0.00266069
0.000964043	-0.0123943	-0.0148312	-0.00811961	-0.00369846	-0.0154149	-0.0090557	-0.0159452	-0.00341245	-0.00321039	-0.00748518	-0.0417946		-0.0111998	0.00319508
0.00133972	-0.0157015	-0.0178605	-0.0105498	-0.00503753	-0.0189721	-0.0108848	-0.0195933	-0.00462491	-0.00427176	-0.0100795	-0.049848		-0.0138403	0.00378767
0.00167877	-0.0194239	-0.0211777	-0.0133573	-0.00674051	-0.0229692	-0.0127134	-0.0237379	-0.00611305	-0.0055558	-0.0130634	-0.0587463		-0.0168266	0.00443603
0.00193849	-0.0235404	-0.0244234	-0.016575	-0.00892624	-0.0274433	-0.0145247	-0.0282689	-0.00787595	-0.0071864	-0.0165351	-0.0682903		-0.0201376	0.00511713
0.00213473	-0.0281508	-0.0275584	-0.0202755	-0.0115348	-0.0321743	-0.0162812	-0.0329948	-0.0101615	-0.00911974	-0.0205724	-0.0782007		-0.0237408	0.00580691
0.00208562	-0.0335504	-0.030387	-0.0244079	-0.0146	-0.0373163	-0.0180951	-0.0378851	-0.0128953	-0.0113815	-0.0252104	-0.0883489		-0.027666	0.00649562
0.0017352	-0.0395891	-0.0330632	-0.0289999	-0.0181382	-0.0427993	-0.0200582	-0.0429968	-0.0159027	-0.0140076	-0.0305806	-0.098826		-0.0319355	0.0071925
0.00101627	-0.0460049	-0.0357492	-0.0342229	-0.0220386	-0.0486038	-0.0221594	-0.0482326	-0.0193058	-0.0169231	-0.0364509	-0.109598		-0.0365228	0.00789359
-0.000347122	-0.0528102	-0.0383303	-0.0401127	-0.0261357	-0.0544913	-0.0241877	-0.0537677	-0.0230876	-0.0202615	-0.0428126	-0.121008		-0.041446	0.0086172
-0.00217344	-0.0600642	-0.0407967	-0.0466012	-0.0307367	-0.0601733	-0.0260544	-0.0596484	-0.0273039	-0.0239634	-0.049448	-0.132918		-0.0466568	0.00935844
-0.00430615	-0.0677148	-0.0430399	-0.0537913	-0.0360151	-0.0660408	-0.0280754	-0.0657814	-0.0318753	-0.028122	-0.0562353	-0.144903		-0.0521584	0.010092
-0.00692603	-0.0756479	-0.0452795	-0.0616283	-0.0418062	-0.0720557	-0.030334	-0.0722075	-0.036951	-0.0328802	-0.063251	-0.157093		-0.058005	0.0108163
-0.0101063	-0.0838083	-0.0475087	-0.0700298	-0.048239	-0.0780571	-0.0328274	-0.0789812	-0.0427729	-0.0380674	-0.0703515	-0.169463		-0.0641844	0.0115249
-0.013798	-0.0922355	-0.0495847	-0.0791639	-0.0552306	-0.0842113	-0.0356656	-0.0861353	-0.0491534	-0.0437051	-0.0776055	-0.181747		-0.0706864	0.0122099
-0.0178086	-0.101183	-0.0518541	-0.0890432	-0.0627245	-0.0904175	-0.038976	-0.0935498	-0.0561463	-0.0497291	-0.0848897	-0.193608		-0.0774941	0.0128525
-0.0220382	-0.110351	-0.0542355	-0.0996733	-0.0708793	-0.0965259	-0.042926	-0.101194	-0.0635432	-0.0560814	-0.092055	-0.205299		-0.0845669	0.0134698
-0.0266766	-0.119284	-0.0566287	-0.111174	-0.0795153	-0.102597	-0.0474363	-0.109229	-0.0713961	-0.062717	-0.0989858	-0.217165		-0.0919003	0.0140826
-0.0315975	-0.128108	-0.0590388	-0.123437	-0.0884029	-0.108614	-0.052516	-0.117539	-0.079998	-0.0695936	-0.105788	-0.229021		-0.0994711	0.0146857
-0.0365458	-0.136783	-0.0612891	-0.136258	-0.0976167	-0.114469	-0.0582429	-0.125941	-0.0890529	-0.0768147	-0.112695	-0.240667		-0.107198	0.0152773
-0.0415874	-0.145282	-0.0635711	-0.149577	-0.107215	-0.120372	-0.0646536	-0.134466	-0.0987217	-0.0842914	-0.119456	-0.251684		-0.115073	0.0158259
-0.0467538	-0.153773	-0.0659092	-0.163381	-0.117014	-0.126521	-0.0718468	-0.143059	-0.109083	-0.0921004	-0.126066	-0.262266		-0.123148	0.0163462
-0.0520748	-0.16224	-0.0684622	-0.177661	-0.127104	-0.132595	-0.0795506	-0.151725	-0.119986	-0.100133	-0.132639	-0.27285		-0.131418	0.0168738
-0.0573907	-0.170469	-0.0711687	-0.192329	-0.137748	-0.138539	-0.0875459	-0.16034	-0.131479	-0.108185	-0.139118	-0.283302		-0.139801	0.0174125
-0.0625274	-0.178466	-0.0737205	-0.207179	-0.148929	-0.144557	-0.0959811	-0.168613	-0.143417	-0.116463	-0.145443	-0.293835		-0.148261	0.0179827
-0.0675077	-0.186173	-0.0764863	-0.222097	-0.160632	-0.150357	-0.104889	-0.176579	-0.15588	-0.124912	-0.151558	-0.304832		-0.156825	0.0185967
-0.072571	-0.193312	-0.07912	-0.237108	-0.17286	-0.156094	-0.114102	-0.184439	-0.16888	-0.133525	-0.157456	-0.316276		-0.165479	0.0192617
-0.0779155	-0.200099	-0.0815784	-0.2522	-0.185574	-0.162056	-0.123565	-0.192146	-0.182381	-0.142414	-0.162976	-0.327964		-0.174239	0.0199647
-0.0833924	-0.206522	-0.084286	-0.267175	-0.198871	-0.168049	-0.133363	-0.1994	-0.196288	-0.151547	-0.168104	-0.34		-0.183083	0.020698
-0.0891355	-0.212352	-0.0869511	-0.282043	-0.21287	-0.174058	-0.143452	-0.206251	-0.210479	-0.161025	-0.172755	-0.352312		-0.191974	0.0214665
-0.0951173	-0.217696	-0.0898213	-0.296865	-0.22748	-0.18015	-0.153742	-0.21292	-0.225154	-0.170872	-0.176866	-0.364471		-0.20093	0.02225
-0.101183	-0.222528	-0.0926581	-0.311309	-0.242643	-0.186507	-0.164156	-0.219517	-0.240042	-0.180936	-0.180649	-0.37676		-0.209907	0.0230707
-0.10723	-0.2269	-0.0953857	-0.325289	-0.258548	-0.193028	-0.174676	-0.226155	-0.254966	-0.191163	-0.184046	-0.389291		-0.21889	0.0239438
-0.113008	-0.230777	-0.098152	-0.338964	-0.274973	-0.199617	-0.185241	-0.232558	-0.270121	-0.201741	-0.187005	-0.401787		-0.227829	0.024865
-0.118764	-0.234171	-0.100754	-0.352471	-0.291495	-0.20646	-0.195689	-0.238455	-0.285205	-0.212647	-0.189508	-0.414619		-0.236686	0.0258515
-0.124735	-0.237139	-0.103705	-0.365997	-0.308232	-0.213563	-0.205916	-0.243896	-0.300095	-0.223832	-0.191539	-0.42748		-0.245511	0.0268671
-0.131075	-0.239597	-0.106755	-0.379653	-0.325016	-0.221026	-0.215857	-0.249057	-0.314848	-0.235374	-0.193274	-0.439939		-0.254289	0.0278942
-0.137778	-0.241654	-0.109913	-0.39331	-0.341467	-0.22873	-0.225485	-0.25401	-0.329222	-0.247126	-0.19474	-0.452359		-0.262983	0.0289364
-0.144512	-0.243247	-0.113399	-0.406713	-0.3578	-0.236601	-0.23464	-0.258763	-0.343161	-0.259123	-0.19595	-0.464755		-0.271555	0.0299915
-0.151136	-0.244407	-0.117006	-0.419986	-0.374162	-0.244803	-0.243357	-0.2636	-0.356776	-0.271484	-0.197063	-0.477069		-0.280071	0.0310711
-0.157762	-0.245502	-0.120991	-0.433133	-0.390259	-0.253316	-0.251677	-0.268571	-0.370083	-0.284043	-0.198049	-0.489123		-0.288542	0.0321421
-0.164578	-0.246729	-0.124995	-0.44621	-0.406152	-0.262152	-0.259264	-0.273375	-0.383005	-0.296681	-0.198791	-0.501063		-0.296916	0.033224
-0.171418	-0.24785	-0.129176	-0.459584	-0.422118	-0.271175	-0.266291	-0.277755	-0.395584	-0.309485	-0.199337	-0.513225		-0.30525	0.0343522
-0.178465	-0.248573	-0.133518	-0.473048	-0.437898	-0.280331	-0.272951	-0.281911	-0.408032	-0.322415	-0.19975	-0.525628		-0.313543	0.0355124
-0.185986	-0.249178	-0.137621	-0.486552	-0.453567	-0.289742	-0.279239	-0.286114	-0.420283	-0.335355	-0.200101	-0.53814		-0.321823	0.0366965
-0.19365	-0.249885	-0.141889	-0.500086	-0.469351	-0.299303	-0.285289	-0.290244	-0.43217	-0.348104	-0.200483	-0.549784		-0.33002	0.0378505
-0.201261	-0.250644	-0.146068	-0.513194	-0.484912	-0.308967	-0.291168	-0.294574	-0.443725	-0.36044	-0.200924	-0.560593		-0.338039	0.0389622
-0.208703	-0.251513	-0.150144	-0.526008	-0.500435	-0.318541	-0.297145	-0.29897	-0.45499	-0.37261	-0.201424	-0.571333		-0.345985	0.0400764
-0.216118	-0.252486	-0.154388	-0.538783	-0.516322	-0.328017	-0.303364	-0.302975	-0.466091	-0.384885	-0.202156	-0.581909		-0.353958	0.0411957
-0.223684	-0.253542	-0.158467	-0.551472	-0.532312	-0.337607	-0.309892	-0.306784	-0.47701	-0.397238	-0.203231	-0.592288		-0.361961	0.0423097
-0.231402	-0.254589	-0.162294	-0.563925	-0.548173	-0.347058	-0.316353	-0.310344	-0.487524	-0.40963	-0.204535	-0.602397		-0.369852	0.043411
-0.239321	-0.25558	-0.166013	-0.576124	-0.564129	-0.356323	-0.322419	-0.313669	-0.497525	-0.422153	-0.20618	-0.612694		-0.377678	0.0445167
-0.247538	-0.256674	-0.169979	-0.588117	-0.580205	-0.365376	-0.328601	-0.316941	-0.507134	-0.434864	-0.208181	-0.623011		-0.385552	0.0455996
-0.256227	-0.258171	-0.174172	-0.599902	-0.596257	-0.374141	-0.334998	-0.320071	-0.516417	-0.44783	-0.210528	-0.632502		-0.393435	0.0466145
-0.265177	-0.260139	-0.178461	-0.611688	-0.612179	-0.382675	-0.341339	-0.322824	-0.525	-0.461081	-0.213401	-0.641284		-0.401271	0.0475714
-0.274476	-0.262427	-0.183327	-0.623317	-0.627666	-0.390871	-0.347709	-0.32528	-0.532773	-0.474341	-0.216708	-0.649855		-0.409062	0.0484554
-0.284503	-0.265068	-0.188498	-0.634931	-0.642682	-0.398808	-0.354403	-0.327715	-0.540046	-0.48795	-0.220458	-0.658633		-0.416975	0.0492895
-0.295105	-0.268023	-0.193873	-0.646871	-0.657299	-0.406334	-0.361366	-0.329866	-0.546943	-0.502106	-0.224696	-0.667082		-0.424964	0.0500842
-0.306133	-0.271247	-0.199695	-0.658786	-0.671458	-0.413547	-0.368304	-0.331827	-0.553462	-0.516184	-0.229478	-0.674806		-0.432911	0.0508007
-0.317526	-0.27495	-0.205589	-0.670583	-0.685081	-0.420515	-0.375027	-0.33378	-0.559537	-0.530146	-0.234855	-0.682091		-0.440807	0.0514492
-0.329075	-0.279359	-0.211903	-0.682297	-0.698105	-0.426659	-0.381384	-0.335545	-0.565336	-0.544137	-0.240747	-0.689286		-0.448653	0.0520409
-0.340691	-0.284306	-0.218618	-0.694013	-0.710837	-0.432095	-0.387882	-0.337111	-0.571152	-0.558007	-0.247238	-0.696434		-0.456532	0.0525931
-0.352491	-0.289644	-0.225383	-0.70584	-0.723203	-0.437208	-0.394915	-0.338369	-0.577005	-0.571582	-0.254227	-0.703276		-0.464428	0.0531092
-0.364176	-0.295344	-0.232317	-0.717542	-0.73481	-0.442096	-0.402156	-0.339479	-0.582828	-0.584968	-0.261915	-0.710278		-0.472326	0.0535788
-0.375656	-0.301145	-0.239273	-0.729088	-0.74582	-0.44693	-0.409441	-0.340588	-0.588485	-0.598406	-0.270411	-0.71738		-0.480219	0.0540135
-0.387228	-0.307048	-0.246075	-0.74042	-0.756433	-0.451762	-0.416907	-0.341678	-0.594175	-0.611739	-0.279313	-0.724405		-0.488099	0.0544252
-0.398397	-0.313029	-0.252532	-0.751369	-0.766815	-0.456604	-0.424462	-0.342808	-0.600208	-0.625064	-0.28859	-0.731166		-0.49592	0.0548284
-0.408909	-0.318878	-0.259	-0.761824	-0.777079	-0.461443	-0.431642	-0.344	-0.606191	-0.638345	-0.298319	-0.737381		-0.503584	0.0552055
-0.419454	-0.324768	-0.26563	-0.771832	-0.787087	-0.466415	-0.438423	-0.345285	-0.611959	-0.65157	-0.308613	-0.743519		-0.511213	0.0555429
-0.430221	-0.33088	-0.272376	-0.781567	-0.796938	-0.471548	-0.444908	-0.346527	-0.617813	-0.665178	-0.319456	-0.749699		-0.518926	0.0558641
-0.440798	-0.33682	-0.279304	-0.790969	-0.80692	-0.476805	-0.451214	-0.347743	-0.623801	-0.678931	-0.330641	-0.755873		-0.526651	0.0561907
-0.451406	-0.342472	-0.286247	-0.800068	-0.816993	-0.48253	-0.457765	-0.34894	-0.629807	-0.692462	-0.342175	-0.761458		-0.53436	0.0564944
-0.46192	-0.348352	-0.293229	-0.808902	-0.827016	-0.488681	-0.464489	-0.350039	-0.635677	-0.705888	-0.35411	-0.766598		-0.542075	0.0567658
-0.471823	-0.354437	-0.299937	-0.81745	-0.837325	-0.494915	-0.471213	-0.351016	-0.641525	-0.719518	-0.366629	-0.771711		-0.549792	0.0570555
-0.481765	-0.360394	-0.306602	-0.825926	-0.848169	-0.501237	-0.478199	-0.351676	-0.647521	-0.733266	-0.379582	-0.77663		-0.557581	0.0573773
-0.492027	-0.366178	-0.313603	-0.834319	-0.859326	-0.507465	-0.485409	-0.351904	-0.653675	-0.74677	-0.392726	-0.782035		-0.565453	0.0577321
-0.502411	-0.371915	-0.320846	-0.842674	-0.870723	-0.513603	-0.492523	-0.351801	-0.660043	-0.760341	-0.406299	-0.787475		-0.573388	0.0581115
-0.513117	-0.377825	-0.328172	-0.851233	-0.882393	-0.519798	-0.49969	-0.351558	-0.666619	-0.774107	-0.420142	-0.792813		-0.581456	0.0585192
-0.524021	-0.384035	-0.335311	-0.860068	-0.894264	-0.525909	-0.507337	-0.351024	-0.673546	-0.788009	-0.433722	-0.798882		-0.589677	0.0589971
-0.5347	-0.390451	-0.342208	-0.86923	-0.906427	-0.531912	-0.515536	-0.34998	-0.680829	-0.80211	-0.446917	-0.805523		-0.597985	0.0595629
-0.544845	-0.397022	-0.348662	-0.878542	-0.918601	-0.537722	-0.524236	-0.348606	-0.688004	-0.816203	-0.459801	-0.812683		-0.606244	0.0601912
-0.554594	-0.403948	-0.354993	-0.887883	-0.930411	-0.543344	-0.533393	-0.347023	-0.694779	-0.830346	-0.472509	-0.820318		-0.614462	0.0608366
-0.563906	-0.411101	-0.361246	-0.897384	-0.942042	-0.548819	-0.542651	-0.345291	-0.701507	-0.844749	-0.485011	-0.828258		-0.622664	0.0615193
-0.573237	-0.418311	-0.367478	-0.907141	-0.95346	-0.554081	-0.551953	-0.343562	-0.708641	-0.859396	-0.496917	-0.8361		-0.630856	0.0622357
-0.58306	-0.42567	-0.374182	-0.9172	-0.964648	-0.559085	-0.561544	-0.341866	-0.715817	-0.873982	-0.508109	-0.843787		-0.639079	0.0629497
-0.592725	-0.433193	-0.38052	-0.927229	-0.975722	-0.563772	-0.57119	-0.340242	-0.722621	-0.888534	-0.518765	-0.851601		-0.647176	0.0636869
-0.602075	-0.440969	-0.386334	-0.937111	-0.98663	-0.568146	-0.580974	-0.338949	-0.729341	-0.903238	-0.528974	-0.85891		-0.655138	0.0644251
-0.611222	-0.448821	-0.392141	-0.947004	-0.997394	-0.572042	-0.591006	-0.337933	-0.735859	-0.917975	-0.538774	-0.865887		-0.663005	0.0651593
-0.620132	-0.456507	-0.398023	-0.956735	-1.00777	-0.575587	-0.600943	-0.336814	-0.742245	-0.932855	-0.548429	-0.873216		-0.670771	0.0659096
-0.628832	-0.464072	-0.40414	-0.966333	-1.01771	-0.578822	-0.610844	-0.335708	-0.748848	-0.94785	-0.558402	-0.880206		-0.678481	0.0666436
-0.63738	-0.471528	-0.410225	-0.975758	-1.02752	-0.581518	-0.620585	-0.334796	-0.755582	-0.962961	-0.568762	-0.886622		-0.686103	0.0673688
-0.645958	-0.478757	-0.416444	-0.985097	-1.03745	-0.58398	-0.630352	-0.334026	-0.762868	-0.978304	-0.579116	-0.892584		-0.693745	0.0681084
-0.654395	-0.48578	-0.422706	-0.994553	-1.04756	-0.586186	-0.640524	-0.333147	-0.770925	-0.993854	-0.589265	-0.897689		-0.701382	0.0688761
-0.662653	-0.49266	-0.428908	-1.0039	-1.05767	-0.588075	-0.650837	-0.331809	-0.779418	-1.00948	-0.599543	-0.902498		-0.708955	0.0696795
-0.670383	-0.499244	-0.435228	-1.01311	-1.0679	-0.589803	-0.661023	-0.330051	-0.788017	-1.02504	-0.6102	-0.907454		-0.716454	0.0705199
-0.677401	-0.505615	-0.441419	-1.02215	-1.07799	-0.591298	-0.670856	-0.328103	-0.796806	-1.0407	-0.620999	-0.912053		-0.723783	0.0713855
-0.684181	-0.511933	-0.447912	-1.03111	-1.08785	-0.592615	-0.680588	-0.326013	-0.806417	-1.05635	-0.631773	-0.916233		-0.731081	0.0722544
-0.690816	-0.518173	-0.454676	-1.04016	-1.09774	-0.593767	-0.690442	-0.323476	-0.816891	-1.07195	-0.642568	-0.920583		-0.738437	0.0731657
-0.697282	-0.524426	-0.46128	-1.04926	-1.10754	-0.594713	-0.700427	-0.320512	-0.828087	-1.08755	-0.653331	-0.925007		-0.745784	0.0741232
-0.703796	-0.530732	-0.467952	-1.05843	-1.11737	-0.595265	-0.710718	-0.317325	-0.839867	-1.10285	-0.663898	-0.928892		-0.753091	0.0750973
-0.710422	-0.537015	-0.474633	-1.06751	-1.12735	-0.595561	-0.721108	-0.313849	-0.852004	-1.11784	-0.67409	-0.932768		-0.760346	0.0761016
-0.71665	-0.543228	-0.481403	-1.07629	-1.13722	-0.595764	-0.731797	-0.310321	-0.864521	-1.13258	-0.683848	-0.936806		-0.767536	0.0771128
-0.722473	-0.549376	-0.488497	-1.08473	-1.14697	-0.595608	-0.742678	-0.306772	-0.877235	-1.14702	-0.693456	-0.940494		-0.774609	0.078112
-0.728483	-0.555486	-0.495797	-1.09293	-1.15663	-0.595232	-0.753377	-0.303436	-0.889969	-1.16102	-0.703006	-0.9441		-0.781622	0.0790888
-0.734843	-0.561526	-0.503268	-1.10095	-1.16597	-0.59473	-0.764451	-0.300683	-0.902468	-1.17473	-0.712139	-0.947315		-0.788589	0.0800174
-0.741685	-0.567445	-0.51089	-1.10855	-1.17498	-0.594123	-0.776037	-0.298208	-0.914835	-1.18848	-0.720851	-0.94994		-0.795502	0.0809152
-0.748906	-0.573297	-0.518457	-1.11572	-1.18394	-0.593484	-0.788068	-0.296059	-0.927349	-1.20205	-0.729345	-0.952259		-0.802411	0.0817922
-0.756218	-0.579196	-0.525886	-1.12254	-1.1929	-0.592691	-0.800386	-0.294321	-0.939403	-1.21541	-0.73777	-0.953766		-0.809207	0.0826364
-0.76327	-0.585162	-0.533377	-1.12881	-1.20174	-0.591784	-0.812704	-0.292808	-0.950805	-1.22875	-0.746259	-0.954401		-0.815823	0.0834464
-0.769885	-0.59113	-0.541115	-1.13453	-1.21033	-0.59108	-0.825328	-0.291591	-0.961701	-1.24189	-0.754681	-0.954721		-0.822331	0.0842084
-0.776229	-0.597039	-0.548925	-1.13983	-1.21856	-0.5906	-0.838157	-0.290713	-0.971927	-1.2548	-0.76293	-0.955008		-0.828726	0.0849264
-0.782486	-0.602884	-0.556468	-1.14475	-1.22658	-0.590097	-0.851125	-0.290258	-0.981942	-1.26766	-0.77103	-0.955135		-0.835034	0.0856254
-0.789017	-0.608604	-0.563555	-1.14957	-1.23456	-0.589906	-0.86413	-0.290014	-0.991713	-1.28028	-0.779007	-0.955019		-0.841281	0.0863169
-0.795693	-0.614157	-0.569972	-1.15429	-1.24251	-0.590045	-0.876995	-0.289811	-1.00108	-1.29275	-0.786758	-0.954886		-0.847413	0.0870187
-0.802193	-0.619558	-0.575959	-1.15874	-1.25049	-0.590327	-0.889821	-0.289608	-1.01056	-1.30523	-0.794245	-0.954719		-0.853454	0.0877411
-0.808577	-0.624945	-0.581439	-1.16317	-1.25856	-0.590893	-0.902137	-0.289213	-1.02025	-1.31751	-0.801665	-0.954687		-0.859421	0.0884894
-0.814818	-0.630372	-0.585758	-1.16759	-1.26678	-0.591556	-0.914137	-0.28889	-1.03012	-1.32973	-0.808961	-0.954863		-0.865298	0.0892762
-0.821007	-0.635683	-0.589445	-1.17208	-1.275	-0.59229	-0.926147	-0.288505	-1.04001	-1.34218	-0.816032	-0.95523		-0.871134	0.0901064
-0.827305	-0.640929	-0.592988	-1.1769	-1.28312	-0.593105	-0.938062	-0.288088	-1.04997	-1.35481	-0.822649	-0.956147		-0.877005	0.0909676
-0.833942	-0.646139	-0.596191	-1.18185	-1.29119	-0.594132	-0.949999	-0.288113	-1.06014	-1.36746	-0.828527	-0.957465		-0.882928	0.0918295
-0.840926	-0.651363	-0.599035	-1.18692	-1.2995	-0.595282	-0.961726	-0.288129	-1.07032	-1.38019	-0.83395	-0.958624		-0.88883	0.0927178
-0.847816	-0.656754	-0.60147	-1.19219	-1.30809	-0.596354	-0.973371	-0.287948	-1.08032	-1.393	-0.839076	-0.959142		-0.894629	0.0936448
-0.85442	-0.662109	-0.603944	-1.19772	-1.31668	-0.597539	-0.985073	-0.287664	-1.08987	-1.40567	-0.843746	-0.959202		-0.900302	0.094575
-0.86084	-0.667431	-0.606552	-1.20336	-1.32536	-0.598494	-0.996825	-0.287153	-1.099	-1.41819	-0.847944	-0.959254		-0.905868	0.0955247
-0.867356	-0.672931	-0.609159	-1.2092	-1.3341	-0.599236	-1.00873	-0.286647	-1.10747	-1.43069	-0.851882	-0.959161		-0.91138	0.0964792
-0.874047	-0.678465	-0.61196	-1.21533	-1.34284	-0.600029	-1.0207	-0.286321	-1.11517	-1.44321	-0.855576	-0.959001		-0.916887	0.0974221
-0.880699	-0.683994	-0.615018	-1.22162	-1.35168	-0.600697	-1.03288	-0.286249	-1.12243	-1.45566	-0.85886	-0.958878		-0.922388	0.0983578
-0.887255	-0.689658	-0.618968	-1.228	-1.36052	-0.60135	-1.04518	-0.286422	-1.1292	-1.46764	-0.861851	-0.958541		-0.927883	0.0992434
-0.893567	-0.695364	-0.623586	-1.23425	-1.36936	-0.601956	-1.05737	-0.286742	-1.13564	-1.47922	-0.864453	-0.95784		-0.933279	0.10009
-0.899645	-0.700965	-0.628118	-1.24031	-1.37811	-0.602655	-1.06927	-0.286911	-1.14172	-1.49069	-0.866807	-0.956953		-0.938513	0.100934
-0.905393	-0.706621	-0.632893	-1.2465	-1.38688	-0.603655	-1.0808	-0.286704	-1.14739	-1.50187	-0.869159	-0.956231		-0.943675	0.101772
-0.910654	-0.712314	-0.637933	-1.25275	-1.39564	-0.604737	-1.09224	-0.286444	-1.15294	-1.51287	-0.871186	-0.955667		-0.948781	0.102605
-0.915885	-0.717845	-0.64294	-1.25893	-1.40436	-0.605957	-1.10359	-0.28632	-1.15843	-1.52399	-0.872889	-0.955229		-0.953863	0.103439
-0.921293	-0.7233	-0.647962	-1.26499	-1.41316	-0.607563	-1.11472	-0.286364	-1.16375	-1.53519	-0.874419	-0.954717		-0.958952	0.104261
-0.92686	-0.728786	-0.653373	-1.27088	-1.4217	-0.609582	-1.12555	-0.286567	-1.16889	-1.54637	-0.875785	-0.953951		-0.964024	0.105043
-0.932526	-0.734548	-0.658961	-1.27676	-1.42986	-0.61198	-1.13614	-0.28659	-1.17424	-1.55735	-0.876935	-0.953212		-0.969092	0.105802
-0.938108	-0.740389	-0.664279	-1.28257	-1.43782	-0.614732	-1.14658	-0.286399	-1.17965	-1.56837	-0.877764	-0.952402		-0.974088	0.106568
-0.943578	-0.745951	-0.669762	-1.28815	-1.4456	-0.617716	-1.15678	-0.286163	-1.18478	-1.57963	-0.878376	-0.951253		-0.978978	0.107331
-0.949093	-0.751394	-0.675362	-1.29388	-1.45316	-0.62085	-1.16669	-0.285747	-1.1895	-1.59101	-0.878848	-0.950059		-0.983799	0.108098
-0.954813	-0.756671	-0.680853	-1.29981	-1.46047	-0.624217	-1.17639	-0.28517	-1.19369	-1.60257	-0.87926	-0.949155		-0.988589	0.108869
-0.960386	-0.761916	-0.686498	-1.30577	-1.46775	-0.627684	-1.18607	-0.284621	-1.19742	-1.61406	-0.879466	-0.948062		-0.993309	0.109633
-0.965989	-0.767246	-0.692257	-1.31179	-1.47492	-0.631097	-1.19554	-0.284096	-1.20067	-1.62554	-0.879464	-0.946443		-0.997921	0.11039
-0.97197	-0.772698	-0.698106	-1.31788	-1.4818	-0.634697	-1.20478	-0.28372	-1.20361	-1.63721	-0.879448	-0.944788		-1.00256	0.111131
-0.978007	-0.778439	-0.704085	-1.32409	-1.48851	-0.638457	-1.21375	-0.283517	-1.20619	-1.64888	-0.879332	-0.943244		-1.00721	0.111847
-0.984019	-0.784439	-0.710051	-1.33046	-1.49503	-0.642033	-1.22242	-0.283127	-1.20837	-1.66079	-0.879328	-0.941777		-1.01182	0.112577
-0.989866	-0.790593	-0.716022	-1.33704	-1.50153	-0.645393	-1.23101	-0.282685	-1.2106	-1.67302	-0.879328	-0.94035		-1.01645	0.113336
-0.995254	-0.796464	-0.722026	-1.34367	-1.50809	-0.648456	-1.23926	-0.282473	-1.2126	-1.68545	-0.879026	-0.938781		-1.02096	0.11411
-1.00029	-0.8022	-0.727823	-1.35022	-1.51452	-0.651239	-1.2473	-0.282267	-1.2141	-1.69792	-0.878616	-0.937185		-1.02531	0.114893
-1.00538	-0.808095	-0.733393	-1.35677	-1.52076	-0.653975	-1.25515	-0.281937	-1.2155	-1.71025	-0.877993	-0.935782		-1.02958	0.115675
-1.01032	-0.814022	-0.738856	-1.36321	-1.52684	-0.656666	-1.26246	-0.281531	-1.21697	-1.72272	-0.877034	-0.934656		-1.03377	0.116465
-1.01492	-0.820256	-0.744294	-1.36943	-1.53293	-0.659375	-1.26934	-0.281168	-1.21841	-1.73518	-0.875891	-0.933885		-1.03792	0.117241
-1.01963	-0.826511	-0.749646	-1.37549	-1.53885	-0.662185	-1.27602	-0.280807	-1.21998	-1.74762	-0.874561	-0.933458		-1.04206	0.118011
-1.02412	-0.832351	-0.754755	-1.38163	-1.54459	-0.664908	-1.28248	-0.280479	-1.22181	-1.76009	-0.873107	-0.933107		-1.04612	0.118796
-1.02811	-0.837794	-0.75961	-1.38768	-1.55031	-0.667486	-1.28847	-0.280164	-1.22357	-1.7722	-0.871784	-0.932805		-1.05	0.11957
-1.03176	-0.842928	-0.764147	-1.39327	-1.55592	-0.670075	-1.29421	-0.279683	-1.2253	-1.78406	-0.870573	-0.932754		-1.05372	0.120335
-1.03514	-0.848011	-0.768312	-1.39861	-1.56142	-0.672745	-1.29979	-0.27921	-1.22707	-1.79554	-0.869227	-0.933027		-1.05734	0.12108
-1.03817	-0.853041	-0.771921	-1.4038	-1.56669	-0.675828	-1.30502	-0.27866	-1.22858	-1.80672	-0.867917	-0.933427		-1.06081	0.1218
-1.04094	-0.858168	-0.775254	-1.40863	-1.57184	-0.67939	-1.31008	-0.278123	-1.22997	-1.81771	-0.866863	-0.933767		-1.06423	0.122489
-1.04359	-0.863582	-0.7786	-1.41314	-1.57705	-0.683051	-1.31486	-0.277673	-1.23159	-1.82824	-0.86604	-0.93434		-1.06765	0.123138
-1.04587	-0.869093	-0.78162	-1.41745	-1.58227	-0.686927	-1.31962	-0.277191	-1.23327	-1.83873	-0.865478	-0.935177		-1.07106	0.12378
-1.04817	-0.874576	-0.784309	-1.42149	-1.58778	-0.691063	-1.32447	-0.276984	-1.23481	-1.84899	-0.865079	-0.935979		-1.07448	0.124403
-1.05037	-0.879937	-0.786782	-1.42558	-1.59347	-0.695336	-1.32912	-0.276763	-1.2363	-1.85877	-0.864802	-0.936661		-1.07782	0.125012
-1.05199	-0.885381	-0.789078	-1.42976	-1.59905	-0.699669	-1.33345	-0.27645	-1.23768	-1.86814	-0.864687	-0.937326		-1.08105	0.1256
-1.05359	-0.891185	-0.791106	-1.43362	-1.60454	-0.704042	-1.33739	-0.276063	-1.2389	-1.8771	-0.864529	-0.938224		-1.08419	0.126157
-1.05535	-0.897227	-0.793137	-1.43741	-1.60997	-0.708668	-1.34098	-0.275438	-1.2401	-1.88597	-0.864208	-0.939347		-1.08732	0.126706
-1.05684	-0.903368	-0.795557	-1.4414	-1.61539	-0.71342	-1.34424	-0.274935	-1.24125	-1.89471	-0.863861	-0.940482		-1.09045	0.127233
-1.05802	-0.909376	-0.798141	-1.44536	-1.62087	-0.718218	-1.34739	-0.274464	-1.2424	-1.90334	-0.863491	-0.941567		-1.09355	0.127756
-1.05909	-0.915093	-0.800942	-1.4493	-1.62649	-0.722966	-1.3503	-0.273928	-1.24363	-1.91177	-0.863094	-0.942893		-1.09662	0.128274
-1.05998	-0.920623	-0.804025	-1.45354	-1.63201	-0.727658	-1.35279	-0.27318	-1.24482	-1.91992	-0.862735	-0.944717		-1.09967	0.128783
-1.06052	-0.926099	-0.807291	-1.45819	-1.6374	-0.732551	-1.35483	-0.272261	-1.24587	-1.92814	-0.862383	-0.946625		-1.10268	0.129295
-1.06069	-0.931692	-0.810699	-1.46301	-1.64267	-0.737436	-1.35631	-0.27132	-1.24665	-1.93613	-0.862035	-0.948503		-1.10559	0.129787
-1.06041	-0.9374	-0.814263	-1.46803	-1.64748	-0.742144	-1.35746	-0.270048	-1.24729	-1.94389	-0.861677	-0.950626		-1.10839	0.130271
-1.05974	-0.943144	-0.818026	-1.47315	-1.65199	-0.746744	-1.35844	-0.268663	-1.24802	-1.95163	-0.86138	-0.952965		-1.11116	0.13075
-1.05884	-0.948938	-0.821964	-1.47831	-1.65652	-0.751454	-1.35922	-0.267211	-1.24885	-1.95914	-0.861325	-0.95591		-1.11397	0.13121
-1.05766	-0.954647	-0.826214	-1.48354	-1.66089	-0.756266	-1.36018	-0.265744	-1.24967	-1.96652	-0.861455	-0.959523		-1.11686	0.131653
-1.05613	-0.960246	-0.830486	-1.48873	-1.66509	-0.760877	-1.36138	-0.26431	-1.25047	-1.97373	-0.861588	-0.963332		-1.1197	0.132091
-1.05446	-0.96587	-0.834492	-1.49395	-1.66916	-0.765345	-1.36244	-0.262688	-1.25142	-1.98074	-0.861842	-0.967183		-1.12247	0.132533
-1.05269	-0.971628	-0.838225	-1.49948	-1.67307	-0.76975	-1.36318	-0.261107	-1.25253	-1.98759	-0.862415	-0.971123		-1.12523	0.132967
-1.05065	-0.977634	-0.841583	-1.50528	-1.67685	-0.774105	-1.36392	-0.259566	-1.25367	-1.99428	-0.863208	-0.975168		-1.12799	0.1334
-1.04837	-0.983773	-0.84457	-1.51116	-1.68034	-0.778462	-1.36472	-0.258143	-1.25501	-2.00087	-0.86403	-0.979077		-1.13071	0.133826
-1.04581	-0.989701	-0.847241	-1.51723	-1.68372	-0.782848	-1.36535	-0.256833	-1.25661	-2.00739	-0.864919	-0.983084		-1.13339	0.134253
-1.04303	-0.995039	-0.84969	-1.52326	-1.687	-0.787128	-1.36592	-0.25553	-1.25842	-2.01371	-0.865899	-0.987139		-1.13598	0.134681
-1.03977	-1.00029	-0.851906	-1.52928	-1.69034	-0.791617	-1.36631	-0.254291	-1.26048	-2.01997	-0.867068	-0.991327		-1.13855	0.135106
-1.03612	-1.00557	-0.853868	-1.53524	-1.69367	-0.796303	-1.36648	-0.253084	-1.26264	-2.02606	-0.868418	-0.995786		-1.1411	0.135519
-1.03231	-1.01071	-0.855422	-1.54089	-1.69684	-0.800845	-1.36647	-0.252004	-1.26478	-2.03178	-0.869661	-0.999846		-1.14346	0.135913
-1.02791	-1.01636	-0.856379	-1.54657	-1.70027	-0.805633	-1.36613	-0.250919	-1.26721	-2.03756	-0.870917	-1.00371		-1.1458	0.136328
-1.02361	-1.02185	-0.856865	-1.55194	-1.70361	-0.810316	-1.36557	-0.249935	-1.26985	-2.0431	-0.872334	-1.00737		-1.14803	0.136729
-1.01892	-1.0276	-0.857228	-1.55746	-1.70719	-0.815433	-1.3648	-0.248908	-1.27287	-2.04882	-0.873907	-1.01151		-1.15039	0.137146
-1.01405	-1.03322	-0.857632	-1.56267	-1.71061	-0.820537	-1.3639	-0.247863	-1.27576	-2.05423	-0.875291	-1.01569		-1.15262	0.137543
-1.00929	-1.03845	-0.858007	-1.56737	-1.71384	-0.825472	-1.36275	-0.246885	-1.27864	-2.05939	-0.876556	-1.01975		-1.1547	0.137918
-1.00362	-1.04478	-0.858432	-1.57238	-1.71806	-0.831386	-1.36115	-0.245579	-1.2823	-2.06533	-0.878144	-1.02508		-1.15719	0.138359
-1.00016	-1.04878	-0.858715	-1.57528	-1.72075	-0.835011	-1.36015	-0.244718	-1.28458	-2.06886	-0.879135	-1.02853		-1.15872	0.138627

## Sheet: noise plus 10 y
fly1	fly2	fly3	fly4	fly5	fly6	fly7	fly8	fly9	fly10	fly11	fly12		Avg	SEM
8.0328e-07	0.000212019	-1.22321e-06	-0.000197655	-3.42402e-08	3.25072e-07	-3.14777e-07	2.03305e-07	3.27867e-08	-3.86056e-08	8.19067e-06	-3.98708e-07		1.82579e-06	2.52336e-05
-8.26863e-07	0.000259461	2.81109e-07	-0.000229853	9.79226e-10	-3.8792e-07	-1.15219e-07	-2.76207e-08	-2.04273e-07	3.44492e-08	-0.000131584	5.4869e-07		-8.55605e-06	3.21679e-05
7.09293e-07	0.000250688	-5.1174e-06	-0.000174538	4.71794e-08	-5.83149e-07	6.94939e-07	-2.35323e-07	3.8002e-07	-1.58828e-08	-0.000211888	-5.82916e-07		-1.17034e-05	3.21678e-05
-1.27482e-07	0.000258504	1.55655e-06	-4.02852e-05	-1.00216e-07	-2.21372e-07	-1.25468e-06	5.30067e-07	-5.00652e-07	-1.68766e-08	-0.000190102	6.47313e-07		2.38584e-06	2.81396e-05
-1.018e-06	0.000251127	-1.41273e-05	0.000197217	1.42026e-07	-2.42388e-06	1.58837e-06	-7.67382e-07	4.9705e-07	5.70465e-08	-0.000196169	-4.51668e-07		1.96392e-05	3.21011e-05
1.00176e-06	0.00025931	5.05692e-05	0.000562186	-1.53056e-07	-3.3347e-08	-1.43539e-06	8.37177e-07	-3.15864e-07	-9.2739e-08	-0.000155455	-1.03051e-06		5.96157e-05	5.27555e-05
-4.69931e-06	0.000250586	0.000242943	0.00100508	1.15192e-07	-7.17566e-06	9.39371e-07	-6.34105e-07	-3.84278e-08	1.08803e-07	-0.00017471	-2.90265e-07		0.000109352	8.78663e-05
-5.8604e-07	0.000257243	0.00042863	0.001603	-1.95583e-08	2.22789e-05	-3.70366e-07	1.65718e-07	5.51044e-07	-8.66983e-08	-0.000276169	-4.7725e-06		0.000169155	0.000139069
-1.20651e-05	0.000248483	0.000633714	0.00242443	-1.25758e-07	0.000134105	-1.63896e-06	5.711e-07	-1.02808e-06	4.55091e-08	-0.00038906	-7.19878e-07		0.000253059	0.000208571
-7.17459e-06	8.7769e-05	0.000990412	0.00338197	2.8797e-07	0.000249604	1.65227e-06	-1.26459e-06	1.47462e-06	1.58265e-08	-0.000509019	-1.23167e-05		0.000348618	0.00029245
6.43351e-05	-9.7988e-05	0.00165253	0.00455443	-4.17194e-07	0.000373136	-6.6381e-06	2.14602e-06	-1.46855e-06	-2.17541e-08	-0.000623566	1.6494e-05		0.000494414	0.000399645
0.000217391	-0.000191692	0.00260129	0.00589455	4.54042e-07	0.000612624	1.17191e-06	-2.97746e-06	6.98355e-07	1.66777e-07	-0.000743335	0.000173037		0.000713615	0.000525438
0.000534849	-0.000223393	0.0038761	0.00738933	-3.25213e-07	0.000958251	-1.17736e-05	9.53544e-07	-2.16517e-06	-6.11205e-07	-0.000768728	0.000420744		0.00101444	0.000670254
0.00115341	-0.000217448	0.00556407	0.0091463	9.44629e-08	0.00137676	5.74828e-05	-5.17567e-06	-4.5125e-06	-1.38253e-07	-0.000839286	0.000754895		0.00141554	0.000848883
0.0023057	-0.000223487	0.00765602	0.0112376	2.75801e-07	0.0019326	0.00017964	-7.03374e-06	-3.36116e-06	-1.98734e-06	-0.000973653	0.00126082		0.00194693	0.00106985
0.00410185	-0.000218882	0.0103789	0.0137139	-4.70996e-07	0.00262052	0.000275625	-9.05536e-06	-1.6124e-05	-1.57975e-06	-0.000993516	0.00203507		0.00265719	0.00134843
0.00667677	-8.69106e-05	0.0136484	0.0165002	1.0311e-06	0.00344189	0.000644892	-2.21958e-05	9.77343e-06	-4.32573e-06	-0.000969938	0.00320827		0.00358733	0.00167918
0.0101845	0.000210494	0.0174876	0.0197586	-2.43526e-06	0.00445036	0.00123135	9.66156e-05	0.00010079	-5.4115e-06	-0.00067665	0.00500047		0.00481969	0.00207445
0.014708	0.000622776	0.0222822	0.0235095	-1.09787e-06	0.00550521	0.00193198	0.000383549	0.000418673	5.50229e-05	5.83306e-05	0.00745348		0.00641064	0.00255645
0.020392	0.00125592	0.0280452	0.0277471	-6.80014e-06	0.00661046	0.00287849	0.00097027	0.00102985	0.000185497	0.00121453	0.0106192		0.00841181	0.00312978
0.0271752	0.00222744	0.0346893	0.032723	-8.46348e-06	0.00800695	0.00416668	0.00198464	0.00184147	0.000372545	0.00290773	0.0147454		0.0109027	0.00379992
0.0351195	0.00354476	0.0422662	0.0384346	-1.46095e-05	0.00960706	0.00590966	0.00345999	0.00298802	0.000678063	0.00510203	0.0196406		0.0138947	0.00456703
0.0442262	0.00521817	0.050885	0.0449243	-9.53311e-06	0.0113821	0.00805471	0.00554206	0.0045073	0.00112396	0.00792336	0.025057		0.0174029	0.00543118
0.0543202	0.00722775	0.0603858	0.0522113	0.000205451	0.0135385	0.01065	0.00824172	0.00648329	0.00171003	0.0115711	0.0312922		0.0214864	0.00637117
0.0653224	0.00964148	0.0707777	0.0602909	0.000718677	0.0160006	0.0135795	0.0116905	0.0090937	0.00246484	0.0161654	0.0384001		0.0261788	0.00737663
0.0770412	0.012548	0.0821851	0.0691475	0.00153068	0.0187225	0.0169018	0.0158731	0.0123949	0.00343519	0.0218961	0.046123		0.0314832	0.00843735
0.0894218	0.0158814	0.0943666	0.0786513	0.00273475	0.0217297	0.0207025	0.0208094	0.016481	0.00473813	0.028699	0.054466		0.0373901	0.00953019
0.102227	0.0196065	0.107411	0.0889946	0.00439052	0.0249906	0.0245332	0.0267493	0.0214176	0.00639224	0.0363864	0.0634553		0.0438795	0.0106594
0.115198	0.0238348	0.121272	0.100243	0.00657915	0.0285778	0.0284161	0.0335698	0.0272348	0.00846102	0.0450623	0.0731741		0.0509686	0.0118109
0.12835	0.0285495	0.135627	0.112249	0.00942748	0.0325948	0.032502	0.041242	0.0338962	0.0110448	0.0548787	0.0835404		0.0586585	0.0129579
0.141749	0.0335771	0.150539	0.125015	0.0129522	0.0370311	0.036698	0.0497764	0.0414613	0.0140012	0.0656833	0.0942025		0.0668906	0.0141116
0.155542	0.0389057	0.166005	0.138406	0.017031	0.0417131	0.0409177	0.0591184	0.0499054	0.0172685	0.0775422	0.105032		0.0756157	0.0152854
0.169687	0.0446069	0.181808	0.152249	0.0217271	0.0466553	0.0450607	0.0692848	0.0592005	0.0208449	0.0906011	0.11621		0.084828	0.0164686
0.184473	0.0507197	0.197916	0.166719	0.0271254	0.0517099	0.0491547	0.080169	0.0695312	0.0248376	0.104481	0.128034		0.0945725	0.0176787
0.200206	0.0572934	0.214493	0.182003	0.0330468	0.0565419	0.0531846	0.0918668	0.0807218	0.0293248	0.118998	0.140265		0.104829	0.018949
0.216865	0.0642594	0.231581	0.197977	0.0393709	0.0613482	0.0572811	0.104445	0.092633	0.0342942	0.134164	0.152736		0.11558	0.0202764
0.234399	0.0717374	0.249055	0.214633	0.0460955	0.0662451	0.0614567	0.117817	0.105439	0.0400164	0.149817	0.165703		0.126868	0.021643
0.252542	0.0797777	0.267012	0.232045	0.0532354	0.0711503	0.0656281	0.13179	0.119309	0.0463588	0.166051	0.179188		0.138674	0.0230536
0.271499	0.0881923	0.285513	0.250146	0.0608557	0.0760099	0.0700071	0.146298	0.134353	0.0531378	0.182855	0.192881		0.150979	0.024517
0.291496	0.0972265	0.304566	0.268827	0.0690213	0.0807593	0.0746652	0.161575	0.150476	0.0604663	0.199893	0.206335		0.163776	0.0260216
0.312158	0.106926	0.324047	0.288243	0.0776861	0.085395	0.0795207	0.177347	0.167562	0.0683494	0.21725	0.219948		0.177036	0.0275642
0.333254	0.11721	0.343358	0.308507	0.0867691	0.0897375	0.0846394	0.19354	0.185642	0.0769337	0.235354	0.233934		0.19074	0.0291273
0.354865	0.128134	0.362989	0.329405	0.0961567	0.0938296	0.0900927	0.21059	0.204891	0.0862519	0.254256	0.248051		0.204959	0.0307268
0.376899	0.139525	0.383672	0.351175	0.105725	0.0977349	0.0958401	0.228527	0.225303	0.096361	0.273957	0.26242		0.219762	0.0324048
0.399128	0.151637	0.405263	0.373788	0.115352	0.101477	0.10186	0.247341	0.246871	0.107292	0.294671	0.276841		0.235127	0.034148
0.42127	0.164643	0.427852	0.396774	0.125041	0.1053	0.108151	0.26692	0.269701	0.119067	0.316427	0.291572		0.25106	0.0359305
0.44322	0.178443	0.451176	0.420292	0.135124	0.10908	0.114623	0.287209	0.293588	0.131733	0.339132	0.306756		0.267531	0.0377448
0.465134	0.192706	0.475311	0.444153	0.145737	0.112713	0.121267	0.308425	0.318464	0.145036	0.362874	0.322175		0.2845	0.03961
0.486826	0.207608	0.500421	0.467872	0.156878	0.116287	0.128103	0.330639	0.344225	0.159132	0.387693	0.338225		0.301992	0.0415071
0.508657	0.223474	0.5262	0.491444	0.16837	0.119897	0.135077	0.353713	0.370679	0.174308	0.413659	0.355129		0.320051	0.0434311
0.531078	0.23953	0.552914	0.515079	0.179857	0.123546	0.1422	0.377605	0.398027	0.190404	0.44088	0.37287		0.338666	0.0454447
0.553837	0.255901	0.581014	0.53901	0.191394	0.12719	0.149586	0.402378	0.426304	0.2073	0.469115	0.391348		0.357865	0.0475576
0.577166	0.272672	0.610898	0.5632	0.203154	0.131098	0.157214	0.427624	0.455432	0.225058	0.498027	0.41051		0.377671	0.049764
0.60125	0.289108	0.64201	0.587813	0.215454	0.13526	0.164896	0.453036	0.485372	0.243799	0.527366	0.430045		0.397951	0.0520514
0.625953	0.305048	0.673855	0.612808	0.22858	0.139665	0.172821	0.4787	0.516038	0.263558	0.557054	0.449795		0.418656	0.0543813
0.651087	0.320397	0.706738	0.637737	0.242459	0.144416	0.181226	0.504963	0.547382	0.284162	0.587067	0.470148		0.439815	0.0567452
0.676141	0.335558	0.740497	0.662654	0.256962	0.149362	0.190016	0.532095	0.579413	0.305492	0.617368	0.490744		0.461358	0.0591339
0.70067	0.351076	0.775379	0.687694	0.271925	0.154589	0.199238	0.559358	0.612208	0.327608	0.647985	0.511735		0.483289	0.0615343
0.725148	0.367192	0.811415	0.713245	0.287303	0.160111	0.208898	0.586207	0.645648	0.350622	0.678659	0.533457		0.505659	0.0639543
0.75028	0.383593	0.848449	0.739817	0.30295	0.16595	0.218993	0.612702	0.679689	0.374586	0.709333	0.555479		0.528485	0.0664228
0.775322	0.400003	0.88689	0.76745	0.318715	0.172166	0.229393	0.639048	0.714356	0.399489	0.740174	0.578297		0.551775	0.068954
0.800124	0.416756	0.926346	0.79587	0.334779	0.178693	0.239976	0.665718	0.749476	0.425403	0.771137	0.601978		0.575521	0.0715203
0.825661	0.433523	0.966559	0.824601	0.351311	0.185703	0.250824	0.693089	0.784994	0.452407	0.80211	0.626169		0.599746	0.0741142
0.851488	0.450342	1.0077	0.853943	0.368262	0.193194	0.26193	0.721599	0.821005	0.480574	0.832872	0.65104		0.624496	0.0767405
0.877249	0.468514	1.04961	0.88404	0.385338	0.201072	0.273465	0.751289	0.85763	0.509702	0.86332	0.676584		0.649818	0.0793758
0.903516	0.488748	1.09227	0.914686	0.402346	0.209437	0.285163	0.782012	0.894741	0.539624	0.893364	0.70277		0.675723	0.0820221
0.930423	0.510406	1.13549	0.946184	0.419276	0.21838	0.296826	0.813484	0.932167	0.570521	0.923141	0.729538		0.702153	0.0846905
0.958647	0.532956	1.17939	0.978373	0.435997	0.227917	0.308675	0.845578	0.969861	0.602413	0.953058	0.757023		0.729158	0.0874052
0.988152	0.555905	1.2239	1.01138	0.452435	0.237864	0.320631	0.87895	1.0078	0.635188	0.983406	0.784794		0.7567	0.0901975
1.01761	0.578909	1.26879	1.04514	0.468666	0.248221	0.332764	0.913457	1.04608	0.668245	1.01414	0.811977		0.7845	0.093036
1.04695	0.602724	1.31406	1.07924	0.484871	0.259139	0.345207	0.949112	1.08458	0.701367	1.04505	0.838497		0.812567	0.0958769
1.07645	0.627182	1.3584	1.11396	0.501523	0.270636	0.35831	0.986116	1.12296	0.73481	1.07618	0.864739		0.840939	0.098651
1.1059	0.651611	1.40197	1.14949	0.518765	0.282642	0.372272	1.02362	1.16116	0.768488	1.10736	0.890814		0.869507	0.101354
1.13522	0.676486	1.44615	1.18574	0.53626	0.294886	0.386797	1.06144	1.19949	0.802712	1.13854	0.916073		0.898316	0.104062
1.1647	0.701847	1.49052	1.22236	0.554036	0.307327	0.401744	1.09916	1.23791	0.83753	1.17003	0.940514		0.927307	0.106761
1.19484	0.72714	1.53501	1.25929	0.57224	0.320111	0.417109	1.13622	1.27615	0.872932	1.20179	0.964883		0.956476	0.109443
1.22544	0.752584	1.57999	1.29664	0.590902	0.33316	0.433267	1.1728	1.31446	0.908944	1.23377	0.988722		0.98589	0.11211
1.25598	0.778488	1.62548	1.33462	0.610226	0.346446	0.4506	1.20922	1.35294	0.945375	1.26593	1.01143		1.01556	0.114745
1.28592	0.804642	1.67147	1.37361	0.630221	0.360083	0.469215	1.24586	1.39146	0.982179	1.29776	1.0332		1.04547	0.117335
1.31608	0.831512	1.71795	1.41322	0.650644	0.374265	0.489132	1.28261	1.42994	1.0191	1.32879	1.05469		1.07566	0.119866
1.34754	0.859104	1.76458	1.45353	0.671523	0.388913	0.510349	1.31947	1.46825	1.05692	1.35924	1.07655		1.10633	0.122344
1.37975	0.886595	1.81149	1.49469	0.693012	0.403684	0.532961	1.35636	1.50665	1.09556	1.38916	1.09818		1.13734	0.124797
1.41251	0.914442	1.85998	1.53582	0.714982	0.418674	0.55686	1.39336	1.54544	1.13361	1.41841	1.11879		1.16857	0.127266
1.44577	0.94329	1.90986	1.57687	0.737378	0.434021	0.581859	1.43065	1.58442	1.17161	1.44722	1.13856		1.20012	0.129736
1.47894	0.973045	1.95948	1.61848	0.760218	0.449466	0.608014	1.46818	1.62316	1.21018	1.47555	1.15835		1.23192	0.132142
1.51178	1.00361	2.00809	1.66062	0.78352	0.465002	0.635611	1.50653	1.66184	1.24914	1.50328	1.17844		1.26395	0.134452
1.54407	1.03463	2.05587	1.70324	0.807196	0.480906	0.664637	1.54572	1.70079	1.2886	1.53036	1.19819		1.29618	0.136675
1.57534	1.06551	2.10261	1.74633	0.830898	0.497204	0.694761	1.58561	1.73982	1.32876	1.55697	1.21809		1.32849	0.138823
1.60615	1.09604	2.14692	1.78974	0.854753	0.513844	0.725531	1.62615	1.77886	1.3698	1.583	1.23878		1.3608	0.140852
1.63729	1.12607	2.1881	1.83346	0.879119	0.53074	0.756683	1.66684	1.81818	1.41175	1.6082	1.2602		1.39305	0.142745
1.66793	1.15578	2.22736	1.87741	0.904126	0.547713	0.788422	1.70801	1.85791	1.45485	1.63306	1.28185		1.42537	0.144555
1.69789	1.18588	2.26636	1.92156	0.929534	0.564884	0.820413	1.75007	1.8978	1.49874	1.65768	1.30348		1.45786	0.146358
1.72797	1.21641	2.30556	1.96596	0.954891	0.582322	0.852362	1.79247	1.93778	1.54375	1.68207	1.32541		1.49058	0.148192
1.75815	1.2467	2.34462	2.01077	0.980216	0.599731	0.884438	1.83494	1.97812	1.59089	1.70651	1.34747		1.52355	0.150074
1.78805	1.27632	2.38354	2.05617	1.00552	0.617273	0.916834	1.87777	2.01858	1.63936	1.73074	1.36946		1.55664	0.151997
1.81771	1.30559	2.42289	2.10198	1.03076	0.635316	0.9498	1.9208	2.05887	1.68833	1.75473	1.39085		1.5898	0.153947
1.84661	1.33493	2.46252	2.14804	1.05598	0.653678	0.982928	1.96387	2.09907	1.73775	1.77884	1.41166		1.62299	0.155923
1.87418	1.36426	2.50129	2.19409	1.08133	0.672171	1.01607	2.00723	2.13907	1.78735	1.80325	1.43256		1.65607	0.157875
1.90171	1.39371	2.54056	2.2401	1.10701	0.690804	1.04959	2.05077	2.17861	1.83692	1.82777	1.45352		1.68926	0.15984
1.92997	1.4235	2.58264	2.28597	1.13284	0.709419	1.0835	2.09418	2.21721	1.88653	1.85249	1.47445		1.72273	0.16191
1.9586	1.45416	2.62646	2.33174	1.15871	0.728043	1.11762	2.1372	2.25494	1.93626	1.87758	1.49531		1.75639	0.164035
1.98753	1.48483	2.67056	2.37773	1.18466	0.746885	1.15217	2.17933	2.29236	1.98613	1.90248	1.51636		1.79008	0.166156
2.01646	1.51449	2.71494	2.42357	1.21075	0.765915	1.18755	2.22097	2.32912	2.03622	1.92682	1.53757		1.8237	0.168261
2.04491	1.54399	2.75927	2.46946	1.23725	0.785202	1.22356	2.26296	2.36463	2.08623	1.95062	1.55872		1.85723	0.170324
2.07294	1.57392	2.80366	2.51546	1.2639	0.804847	1.26025	2.3049	2.39918	2.13602	1.97388	1.58022		1.89076	0.172337
2.10116	1.6047	2.84814	2.56065	1.2904	0.824691	1.29745	2.34634	2.43334	2.1857	1.99703	1.60275		1.92436	0.174295
2.13023	1.63614	2.89259	2.60473	1.31684	0.844825	1.33485	2.38719	2.46742	2.23527	2.02002	1.62649		1.95805	0.176195
2.16099	1.66786	2.93867	2.6483	1.3432	0.865462	1.37289	2.42711	2.5013	2.28518	2.04245	1.6509		1.99203	0.178109
2.19366	1.70019	2.98683	2.69215	1.36973	0.886522	1.41152	2.46597	2.53454	2.33571	2.06426	1.67567		2.0264	0.180071
2.22714	1.73294	3.03505	2.73542	1.39657	0.907872	1.45043	2.50363	2.56727	2.38677	2.08559	1.70074		2.06079	0.181983
2.26079	1.76569	3.08321	2.77768	1.42359	0.929585	1.48985	2.5406	2.5999	2.43806	2.10676	1.72569		2.09512	0.183844
2.29486	1.7978	3.13288	2.81928	1.45071	0.951765	1.52942	2.57755	2.63218	2.48954	2.12773	1.74967		2.12945	0.185766
2.32986	1.82961	3.18414	2.8598	1.47767	0.974365	1.56803	2.61441	2.66381	2.54108	2.14869	1.77291		2.1637	0.187763
2.36542	1.86214	3.235	2.89991	1.50417	0.997449	1.60592	2.65057	2.69562	2.59254	2.17028	1.79651		2.19796	0.189741
2.40139	1.89472	3.28383	2.93997	1.53023	1.02103	1.64373	2.68531	2.7282	2.64424	2.19234	1.82053		2.23213	0.191634
2.43823	1.92741	3.3315	2.98021	1.55626	1.04498	1.68133	2.7192	2.76087	2.69621	2.21394	1.84433		2.26621	0.193494
2.47519	1.96058	3.37899	3.02093	1.58248	1.06932	1.71895	2.75325	2.79339	2.74831	2.23508	1.86717		2.3003	0.195368
2.51152	1.99364	3.42626	3.06195	1.60894	1.09395	1.75654	2.7875	2.82558	2.8003	2.2564	1.88945		2.33434	0.197246
2.54705	2.0268	3.47322	3.10303	1.63564	1.11868	1.79349	2.82207	2.85716	2.85186	2.27799	1.9119		2.36824	0.199111
2.58197	2.06	3.52002	3.14329	1.66222	1.14355	1.82942	2.85726	2.8885	2.90308	2.30008	1.93429		2.40198	0.200979
2.61668	2.09337	3.56657	3.18376	1.68866	1.16872	1.86485	2.89304	2.92005	2.95389	2.32242	1.9565		2.43571	0.202865
2.65146	2.12753	3.61195	3.22506	1.71519	1.19418	1.9002	2.92898	2.95198	3.00452	2.34424	1.97915		2.46954	0.204716
2.68641	2.16252	3.65569	3.26649	1.74177	1.21968	1.93531	2.96461	2.98426	3.05461	2.36567	2.00309		2.50334	0.206477
2.72134	2.19843	3.69807	3.30841	1.76845	1.24518	1.9708	2.99984	3.01676	3.10376	2.38677	2.02787		2.53714	0.208152
2.75687	2.23471	3.74073	3.35009	1.7956	1.27064	2.00675	3.03464	3.04912	3.15264	2.40749	2.05283		2.57101	0.209808
2.79268	2.27052	3.78493	3.39086	1.82315	1.29604	2.04267	3.06907	3.08119	3.2014	2.42858	2.07821		2.60494	0.211493
2.82784	2.30586	3.8295	3.4306	1.85082	1.32157	2.07851	3.10297	3.11317	3.24997	2.45071	2.10338		2.63874	0.213153
2.86327	2.34103	3.87367	3.46963	1.87855	1.34728	2.11419	3.13581	3.14509	3.29822	2.47356	2.12788		2.67235	0.214767
2.89976	2.37624	3.91723	3.50831	1.90571	1.37312	2.15002	3.16791	3.17668	3.34632	2.49652	2.15191		2.70581	0.216358
2.93748	2.41107	3.95992	3.54615	1.93224	1.39913	2.18641	3.19995	3.20818	3.39428	2.51968	2.17559		2.73917	0.217911
2.97645	2.4454	4.00209	3.58327	1.95867	1.42517	2.22356	3.23188	3.23986	3.4417	2.54312	2.1992		2.77253	0.219423
3.01627	2.47958	4.04429	3.61936	1.9851	1.45117	2.26095	3.26347	3.27118	3.48906	2.56653	2.22244		2.80578	0.22092
3.05635	2.51355	4.08683	3.65425	2.01123	1.47729	2.29782	3.29474	3.30198	3.53639	2.59019	2.24536		2.83883	0.222416
3.09658	2.5475	4.13003	3.6883	2.03688	1.50362	2.33514	3.32592	3.33219	3.5837	2.61463	2.26747		2.87183	0.223926
3.13735	2.58133	4.17348	3.72152	2.06228	1.53011	2.37322	3.35755	3.3617	3.63116	2.64006	2.28849		2.90485	0.225441
3.1784	2.61509	4.21566	3.75444	2.08755	1.55678	2.41156	3.38989	3.39102	3.678	2.66604	2.30921		2.9378	0.226896
3.22005	2.64957	4.25627	3.78735	2.11283	1.58357	2.45034	3.42262	3.42001	3.72415	2.69184	2.3291		2.97064	0.228283
3.26279	2.68414	4.29569	3.82016	2.13818	1.6103	2.48889	3.45582	3.44849	3.76967	2.71718	2.34869		3.00333	0.229639
3.30599	2.71758	4.33414	3.85277	2.16372	1.63695	2.52718	3.48966	3.47703	3.81441	2.74229	2.36915		3.03591	0.230955
3.34874	2.75026	4.37187	3.88516	2.18992	1.6636	2.56557	3.52379	3.50586	3.85822	2.76768	2.38978		3.06837	0.232207
3.39029	2.783	4.40811	3.91756	2.21666	1.69016	2.60413	3.55792	3.53475	3.90155	2.79334	2.4093		3.10056	0.233395
3.43066	2.81589	4.44313	3.95031	2.24364	1.71672	2.64308	3.59205	3.56341	3.94522	2.81917	2.42758		3.13257	0.234557
3.47055	2.84884	4.47754	3.98352	2.27085	1.74327	2.68232	3.62576	3.59202	3.98895	2.84578	2.44558		3.16458	0.235695
3.5103	2.88191	4.51133	4.01678	2.29838	1.76971	2.72229	3.65889	3.62085	4.03267	2.87297	2.46351		3.19663	0.236792
3.54978	2.91513	4.54463	4.04985	2.32649	1.79611	2.76264	3.69224	3.64998	4.07666	2.89999	2.48196		3.22879	0.237856
3.58818	2.9485	4.57747	4.0827	2.35527	1.82241	2.80291	3.72588	3.67937	4.12121	2.92687	2.50105		3.26099	0.238889
3.62519	2.98176	4.61081	4.11529	2.38429	1.84872	2.84332	3.75985	3.70843	4.1664	2.95363	2.51989		3.29313	0.239952
3.66163	3.01502	4.64486	4.14766	2.41307	1.87514	2.88397	3.79444	3.73699	4.21204	2.98039	2.53905		3.32536	0.24105
3.69796	3.04886	4.67922	4.17989	2.44138	1.90173	2.92543	3.82897	3.76526	4.25837	3.00759	2.55953		3.35785	0.242134
3.73426	3.08371	4.71388	4.21217	2.46931	1.92848	2.96746	3.86298	3.7931	4.3054	3.03505	2.58093		3.39056	0.24321
3.771	3.11941	4.74875	4.24429	2.49734	1.95527	3.00958	3.89658	3.82017	4.35263	3.06245	2.60288		3.42336	0.244271
3.80868	3.15533	4.7849	4.27616	2.52564	1.98192	3.05191	3.92971	3.84654	4.39913	3.08983	2.62602		3.45632	0.245328
3.84693	3.19123	4.8214	4.30775	2.55392	2.00822	3.09428	3.96287	3.87278	4.44447	3.11706	2.65049		3.48928	0.24636
3.88505	3.22693	4.85664	4.33913	2.58188	2.03452	3.13617	3.99695	3.89898	4.48926	3.1441	2.67517		3.52207	0.247355
3.92273	3.26223	4.89092	4.37072	2.6098	2.06098	3.17742	4.03171	3.92492	4.53394	3.17132	2.69907		3.55465	0.248348
3.95975	3.29696	4.92397	4.40252	2.63789	2.08743	3.21851	4.06647	3.95044	4.57848	3.19892	2.72243		3.58698	0.249303
3.99704	3.33092	4.95582	4.43441	2.66596	2.11394	3.25978	4.10077	3.97553	4.62286	3.22679	2.74529		3.61909	0.250221
4.03529	3.36445	4.98638	4.46574	2.69424	2.14047	3.30104	4.13414	4.00056	4.66692	3.25496	2.76775		3.651	0.251075
4.07393	3.39783	5.01602	4.49624	2.7226	2.167	3.34218	4.1671	4.02559	4.71049	3.2836	2.79012		3.68272	0.251863
4.11252	3.43124	5.04502	4.52656	2.75104	2.19342	3.38331	4.20056	4.05024	4.75368	3.31221	2.81163		3.71429	0.252651
4.15073	3.46446	5.0725	4.55676	2.77984	2.21968	3.42443	4.23486	4.07441	4.79671	3.34075	2.8328		3.74566	0.253394
4.18898	3.49735	5.09909	4.58695	2.80866	2.24592	3.46568	4.26999	4.09862	4.83985	3.36959	2.85438		3.77709	0.254118
4.22736	3.52976	5.1252	4.61719	2.83721	2.27248	3.50708	4.30577	4.12292	4.88346	3.39853	2.87605		3.80858	0.254857
4.26465	3.56097	5.15131	4.64709	2.8654	2.29958	3.54867	4.34175	4.14695	4.92736	3.42765	2.89797		3.83995	0.255582
4.30054	3.59167	5.17836	4.67676	2.89365	2.32684	3.59064	4.37763	4.17105	4.9708	3.45703	2.92028		3.87127	0.256295
4.33598	3.62269	5.20549	4.70632	2.92198	2.35407	3.63311	4.41362	4.19509	5.01336	3.48647	2.94319		3.90261	0.256962
4.37183	3.65392	5.23236	4.73572	2.95013	2.38148	3.67597	4.44974	4.21917	5.05496	3.51601	2.96684		3.93401	0.257575
4.40826	3.68513	5.25902	4.76496	2.97815	2.40896	3.71846	4.48627	4.24359	5.09541	3.54556	2.99107		3.9654	0.258152
4.4449	3.7163	5.28575	4.7944	3.0061	2.43628	3.76054	4.52386	4.26799	5.13487	3.57513	3.01523		3.99678	0.258747
4.48145	3.74748	5.31308	4.82428	3.03461	2.46354	3.80264	4.56206	4.29248	5.17337	3.60468	3.03882		4.02821	0.259365
4.51816	3.77774	5.34023	4.85384	3.06367	2.49097	3.84485	4.60032	4.31697	5.21022	3.63439	3.06254		4.05949	0.259904
4.55535	3.8071	5.36688	4.88297	3.09282	2.51863	3.88694	4.63868	4.3416	5.2457	3.66425	3.08641		4.09061	0.260377
4.59224	3.83598	5.39263	4.91173	3.1221	2.54636	3.92819	4.67693	4.36659	5.28044	3.69398	3.11011		4.12144	0.260797
4.62872	3.86463	5.41686	4.93998	3.15163	2.57412	3.96894	4.7152	4.39154	5.31425	3.72367	3.13394		4.15195	0.261115
4.66604	3.89394	5.44017	4.96837	3.18176	2.60188	4.00952	4.75372	4.41666	5.34728	3.75303	3.15814		4.18254	0.261374
4.70445	3.92303	5.46311	4.9966	3.21216	2.62958	4.05041	4.79239	4.44179	5.37962	3.78206	3.18339		4.21322	0.261589
4.74358	3.95117	5.48624	5.02443	3.24256	2.65737	4.09129	4.8311	4.46713	5.41132	3.8112	3.20986		4.24394	0.261769
4.78309	3.97891	5.51005	5.05202	3.27327	2.68512	4.1315	4.86981	4.49284	5.44253	3.8403	3.23672		4.27468	0.261958
4.82267	4.00653	5.53464	5.07932	3.30424	2.7127	4.17218	4.90873	4.51846	5.47349	3.86932	3.26369		4.3055	0.26217
4.86236	4.03395	5.55954	5.10672	3.33521	2.7403	4.21283	4.94783	4.54418	5.50448	3.89837	3.29166		4.33645	0.262383
4.90194	4.06127	5.584	5.13379	3.36609	2.76804	4.25293	4.98678	4.56997	5.53559	3.92749	3.32083		4.36739	0.262546
4.94134	4.08937	5.60882	5.16065	3.39708	2.79581	4.2929	5.02528	4.59617	5.56718	3.95658	3.35001		4.39843	0.262721
4.98077	4.11833	5.63501	5.18763	3.4282	2.82355	4.333	5.0635	4.62283	5.599	3.98532	3.37915		4.42969	0.262957
5.01998	4.14792	5.66245	5.21459	3.45936	2.8514	4.37383	5.10179	4.6498	5.63078	4.01372	3.40858		4.46118	0.263224
5.05892	4.17835	5.69099	5.24181	3.49034	2.87941	4.41494	5.13941	4.6773	5.66277	4.04186	3.43774		4.49282	0.263536
5.09849	4.20932	5.72014	5.26888	3.52098	2.90746	4.45629	5.17645	4.7049	5.69453	4.07012	3.46638		4.52449	0.263881
5.13854	4.24093	5.74943	5.29597	3.55172	2.93532	4.4977	5.21349	4.73251	5.72574	4.09862	3.49372		4.55614	0.264265
5.1782	4.27314	5.77889	5.32297	3.58279	2.96308	4.53894	5.2505	4.76016	5.75667	4.12695	3.5194		4.58764	0.264688
5.2176	4.30575	5.80846	5.34946	3.61381	2.99096	4.57997	5.28735	4.78782	5.78763	4.15512	3.54418		4.61901	0.265127
5.25634	4.33897	5.83805	5.37573	3.64471	3.01904	4.62027	5.32358	4.81552	5.81852	4.18337	3.56832		4.6502	0.265553
5.29409	4.37239	5.8677	5.40169	3.67574	3.04728	4.6604	5.35928	4.84343	5.849	4.21178	3.59157		4.68119	0.265953
5.33147	4.405	5.89751	5.42777	3.70686	3.07536	4.70001	5.39432	4.87189	5.87921	4.24014	3.61437		4.71199	0.266369
5.36887	4.43669	5.92735	5.45403	3.73814	3.10337	4.73843	5.42913	4.90081	5.90946	4.26872	3.63731		4.74269	0.266796
5.40631	4.46796	5.95685	5.47977	3.76943	3.13128	4.77605	5.46409	4.93004	5.93962	4.29782	3.65973		4.77325	0.267225
5.44385	4.4991	5.98627	5.50511	3.80089	3.15909	4.81344	5.49909	4.95961	5.96963	4.32722	3.68169		4.80375	0.267659
5.48154	4.53027	6.01546	5.53032	3.83286	3.18634	4.85088	5.53459	4.98956	5.99942	4.35696	3.70379		4.83433	0.2681
5.51883	4.56143	6.04411	5.5555	3.86506	3.2127	4.88809	5.57026	5.0198	6.02918	4.38661	3.72592		4.86479	0.268558
5.55601	4.59255	6.07285	5.58075	3.89743	3.23933	4.92546	5.60594	5.05048	6.0593	4.41604	3.74864		4.8954	0.269005
5.59359	4.62345	6.10151	5.60623	3.92955	3.26558	4.96305	5.64135	5.08126	6.08944	4.44546	3.7716		4.926	0.269483
5.63159	4.6545	6.13042	5.63222	3.96198	3.29124	5.00111	5.67701	5.11213	6.11956	4.47511	3.79478		4.9568	0.270005
5.66997	4.68568	6.15952	5.65842	3.99474	3.31645	5.03908	5.71316	5.14314	6.1493	4.50459	3.81821		4.98769	0.270554
5.70911	4.71712	6.18874	5.68486	4.02745	3.34096	5.07661	5.74967	5.17421	6.17855	4.53377	3.84117		5.01852	0.271173
5.74923	4.74969	6.21867	5.71151	4.0605	3.36568	5.11488	5.78716	5.20575	6.20718	4.56332	3.86338		5.04975	0.27184
5.7889	4.78231	6.24848	5.73785	4.09299	3.39006	5.15366	5.82431	5.23714	6.23446	4.59247	3.88399		5.08055	0.272536
5.82891	4.81455	6.27919	5.76516	4.12596	3.41493	5.19379	5.86147	5.26891	6.26185	4.62192	3.904		5.11172	0.273284
5.86913	4.8453	6.3099	5.79253	4.15857	3.43967	5.23332	5.89781	5.30019	6.289	4.65102	3.92347		5.14249	0.27407
5.90982	4.87522	6.34119	5.81974	4.19138	3.46506	5.27192	5.9337	5.3309	6.31638	4.67984	3.94355		5.17322	0.274836
5.95038	4.9048	6.37337	5.8468	4.22473	3.49157	5.30993	5.96941	5.36135	6.34364	4.70889	3.96429		5.2041	0.275533
5.98973	4.93358	6.40475	5.87277	4.2573	3.51747	5.34661	6.00376	5.39036	6.3698	4.73763	3.98331		5.23392	0.276214
6.02973	4.96389	6.43727	5.89927	4.29161	3.54502	5.38502	6.03893	5.4197	6.39694	4.76782	4.00253		5.26481	0.276852
6.06658	4.99236	6.46782	5.92414	4.32406	3.57162	5.4215	6.07168	5.44765	6.42224	4.79648	4.02062		5.2939	0.27739
6.10488	5.02187	6.50013	5.94997	4.35831	3.60027	5.46045	6.10556	5.47715	6.44895	4.8268	4.03998		5.32453	0.277902
6.14185	5.05011	6.53163	5.97482	4.3918	3.62879	5.49909	6.13799	5.50562	6.47499	4.85634	4.05914		5.35435	0.278349
6.17641	5.07627	6.56125	5.99835	4.42368	3.65607	5.53609	6.16835	5.53228	6.50028	4.8843	4.07799		5.38261	0.278737
6.21724	5.10854	6.597	6.02614	4.46265	3.68921	5.58022	6.20484	5.56356	6.53175	4.9181	4.10273		5.41683	0.279104
6.24221	5.12889	6.6191	6.04302	4.48686	3.70977	5.60726	6.22733	5.58262	6.55127	4.939	4.11857		5.43799	0.279294
