# Supplementary material for: How spatial release from masking may fail to function in a highly directional auditory system
Source: eLife. 2017 Apr 25;6:e20731. doi: 10.7554/eLife.20731 (PMC5443663; doi:10.7554/eLife.20731)
Supplement: Figure 5—source data 3. — The target signal was presented at 76 dB SPL from a forward speaker while the masker was presented at the same intensity from an adjacent speaker to the left. ‘X’ and ‘Y’ coordinates of virtual walking paths measured from the treadmill system. Data plotted in Figure 5C. DOI: http://dx.doi.org/10.7554/eLife.20731.019 [file elife-20731-fig5-data3.xlsx]

## Sheet: control x
fly1	fly2	fly3	fly4	fly5	fly6	fly7	fly8	fly9	fly10	fly11	fly12		Avg	SEM
-0.000410644	0.00020654	1.01502e-07	6.54806e-07	-0.000104273	0.000414854	-1.5413e-08	-9.2249e-05	1.04981e-07	0.00130888	1.43291e-07	8.21476e-05		0.000117187	0.000121789
-0.000895769	0.000441168	-8.45346e-07	-1.18097e-06	-0.000193907	0.000775485	4.7991e-07	-0.00018346	-1.1085e-06	0.00261651	-1.51213e-06	0.000241669		0.000233127	0.00024498
-0.0013723	0.000609297	-8.68599e-07	-3.67545e-07	-0.000275004	0.00109079	3.75752e-07	-0.000260212	-4.55575e-06	0.00389101	-1.78601e-07	0.000350164		0.000335679	0.000364089
-0.00173701	0.000745025	-1.34959e-06	-1.11795e-06	-0.000341879	0.00142767	2.47602e-08	-0.000331844	-3.89452e-06	0.00527207	-2.42676e-06	0.000425717		0.000454248	0.000487242
-0.0019821	0.000877595	-4.06028e-06	-3.0587e-06	-0.000410089	0.00173819	1.65704e-07	-0.000393334	-1.34802e-05	0.00660769	1.92735e-05	0.000490852		0.000577304	0.000602688
-0.00217994	0.000919331	8.69491e-06	1.41903e-06	-0.000464562	0.00203453	3.79103e-07	-0.000452874	-1.0232e-05	0.00788509	0.000105001	0.000486053		0.000694407	0.000711343
-0.00238923	0.00091846	6.37099e-05	3.71356e-05	-0.000468519	0.00233167	-2.17757e-05	-0.000510197	5.58524e-05	0.00915912	0.000187395	0.000431599		0.000816268	0.000819242
-0.00262011	0.000892746	0.000161732	0.00013021	-0.00042282	0.00262942	-9.23076e-05	-0.000568443	0.000341273	0.0104227	0.000241414	0.000385499		0.000958438	0.000925486
-0.00283723	0.000838191	0.000283459	0.000221126	-0.000282977	0.0029664	-0.000137546	-0.000596974	0.000910064	0.0117838	0.000304791	0.000422504		0.0011563	0.00103737
-0.00303659	0.000747021	0.000488643	0.000378404	-4.32237e-05	0.00337736	-0.000100093	-0.000569759	0.00177141	0.0132864	0.00038546	0.000429718		0.00142623	0.00115959
-0.00326226	0.000568893	0.000805757	0.000602357	0.000293066	0.00386886	-1.7726e-05	-0.000474529	0.00305978	0.0148266	0.00042065	0.000386382		0.00175649	0.00129027
-0.003605	0.000282019	0.00122539	0.000780716	0.000812405	0.00446066	0.000113651	-0.000218577	0.00474898	0.0163534	0.000315863	0.000434724		0.00214202	0.0014329
-0.00399409	-0.000185951	0.00185522	0.00105028	0.00164062	0.00518427	0.00035881	0.000150164	0.00694033	0.0178286	0.000142506	0.000492736		0.00262195	0.0015908
-0.00430248	-0.000734357	0.00269485	0.00144728	0.00273068	0.00602832	0.000725431	0.000547453	0.00966883	0.0192786	-2.36555e-05	0.000586871		0.00322065	0.0017711
-0.00458302	-0.00137346	0.00366383	0.00195153	0.00400389	0.00707775	0.00109808	0.00101477	0.0128487	0.0207233	-0.000138217	0.000806698		0.00392449	0.00198265
-0.00493048	-0.0021062	0.00477699	0.00255599	0.00549981	0.00841572	0.00154532	0.00149749	0.0166333	0.0220209	-0.000193379	0.00104099		0.0047297	0.00223279
-0.00526439	-0.00281338	0.00596155	0.00320422	0.00719415	0.00992018	0.00212261	0.0019978	0.0209557	0.0231287	-0.000284616	0.00120139		0.00561032	0.00251961
-0.00551895	-0.00368725	0.00713426	0.00383049	0.009089	0.0115381	0.00269401	0.00252676	0.0257416	0.0240156	-0.000378049	0.00130341		0.00652408	0.0028464
-0.00587443	-0.00464205	0.00828511	0.00434617	0.0110901	0.0133886	0.00333478	0.00308252	0.0309125	0.0246237	-0.000471289	0.00137957		0.00745461	0.00321412
-0.00627487	-0.00551901	0.0093964	0.00490077	0.0130715	0.015422	0.00402817	0.00371621	0.0363278	0.0248619	-0.000571781	0.00140397		0.00839692	0.0036044
-0.00664478	-0.00628247	0.0104474	0.00543025	0.0150076	0.0175329	0.00465717	0.00435122	0.0419712	0.0246038	-0.000748525	0.00142113		0.00931225	0.00401173
-0.00707493	-0.0068169	0.0113852	0.00593793	0.0167755	0.0197735	0.00520569	0.00499672	0.0477651	0.0239814	-0.00106539	0.00126445		0.0101774	0.00444007
-0.00740334	-0.00719921	0.0121554	0.00657237	0.0182424	0.0221538	0.00563324	0.00564463	0.0537924	0.0231099	-0.00141672	0.000681061		0.0109972	0.00489563
-0.00760306	-0.00741895	0.0126267	0.00713917	0.0193122	0.0247258	0.00584457	0.00619543	0.0600125	0.0219739	-0.00191907	-0.000119165		0.0117308	0.00537729
-0.00787186	-0.00747881	0.0128058	0.00759946	0.0199088	0.0274528	0.00586607	0.00671798	0.0663051	0.0205918	-0.00269801	-0.0010509		0.0123457	0.00588332
-0.00821927	-0.00723903	0.0127763	0.00792971	0.0200114	0.0301874	0.0058065	0.00728745	0.0726725	0.0190195	-0.00378442	-0.00219811		0.0128542	0.00641026
-0.00854083	-0.00673432	0.0124877	0.00816222	0.0196532	0.0329828	0.00538988	0.00803276	0.0790938	0.0174397	-0.00512633	-0.00334555		0.0132913	0.00695555
-0.00893174	-0.00607889	0.0120295	0.00841725	0.0187933	0.0359328	0.00461523	0.0090248	0.0856866	0.0159553	-0.00657126	-0.00454058		0.0136943	0.00753251
-0.00930906	-0.00492658	0.0113803	0.00877912	0.0174153	0.0389733	0.00369972	0.010166	0.0923402	0.0145963	-0.00806121	-0.00592444		0.0140941	0.00812445
-0.00949513	-0.00356733	0.010584	0.00927419	0.0155906	0.041938	0.00248019	0.0113826	0.0988908	0.013382	-0.00958897	-0.00744983		0.0144518	0.00872048
-0.00964579	-0.0023484	0.00974446	0.00977973	0.0133598	0.0449272	0.000852762	0.0125919	0.105416	0.0123328	-0.0112457	-0.00925222		0.0147094	0.00934428
-0.00972556	-0.00107487	0.00875715	0.0103161	0.01083	0.0480718	-0.00111289	0.0139543	0.112028	0.0115769	-0.0128657	-0.0112821		0.0149561	0.00999847
-0.00962034	0.000248352	0.00767941	0.0106883	0.0080883	0.0512613	-0.00320543	0.0154968	0.118801	0.0109858	-0.0142654	-0.013384		0.0152312	0.0106752
-0.0093572	0.00172574	0.00653171	0.0108242	0.00512811	0.0545097	-0.00542889	0.0171446	0.125537	0.0104654	-0.015507	-0.0154264		0.0155123	0.0113589
-0.0088797	0.00344132	0.00538869	0.0109355	0.00188986	0.0577312	-0.00781969	0.0191665	0.13207	0.0100664	-0.016613	-0.0172107		0.0158472	0.0120311
-0.00813493	0.00523918	0.00420781	0.010961	-0.00150859	0.060883	-0.0103389	0.0214365	0.138547	0.0095777	-0.0176072	-0.0189126		0.0161958	0.012707
-0.0071533	0.00694942	0.00297362	0.0108751	-0.00495013	0.0640225	-0.0129761	0.023769	0.145013	0.00903179	-0.018415	-0.0206946		0.0165371	0.0133936
-0.0059009	0.00864487	0.0018673	0.0106425	-0.00852185	0.0670793	-0.0155319	0.0261586	0.151314	0.00854087	-0.0191735	-0.0225741		0.0168788	0.0140754
-0.00431134	0.0102212	0.000792505	0.0101156	-0.0122199	0.0701331	-0.0181096	0.0285096	0.157437	0.00794689	-0.0200495	-0.0244167		0.0171708	0.0147567
-0.00261019	0.0115173	-0.000167515	0.00925849	-0.0160264	0.0731227	-0.0207657	0.0308746	0.16341	0.00724157	-0.0210024	-0.0260614		0.0173992	0.0154371
-0.000910956	0.0129743	-0.00101941	0.0080792	-0.0199813	0.0760105	-0.0233778	0.033236	0.169238	0.00635996	-0.0220292	-0.0275731		0.0175838	0.0161153
0.000884056	0.0146861	-0.00179149	0.00655641	-0.0241917	0.0789269	-0.0259222	0.0356556	0.175028	0.00517374	-0.0230244	-0.0288011		0.017765	0.0167997
0.00275799	0.0164479	-0.00241182	0.00480668	-0.0286729	0.0817317	-0.02838	0.0380185	0.180581	0.00380541	-0.0240537	-0.0298562		0.0178978	0.0174751
0.00476373	0.0182376	-0.00304627	0.00297854	-0.0333825	0.0843455	-0.0308688	0.0402591	0.185732	0.00232826	-0.0252497	-0.0305943		0.0179586	0.0181285
0.00681935	0.0199252	-0.00364216	0.00103726	-0.0383369	0.0867887	-0.0333563	0.042485	0.190586	0.00072321	-0.0266451	-0.0308938		0.0179575	0.018768
0.00879966	0.0215403	-0.00425804	-0.00109214	-0.0434043	0.089075	-0.0357844	0.0445218	0.195132	-0.000864539	-0.0282187	-0.0314348		0.0178343	0.0194014
0.0106763	0.0231869	-0.00486055	-0.00339973	-0.0485151	0.0913377	-0.0381941	0.0464732	0.199508	-0.00230363	-0.0298597	-0.0320706		0.0176649	0.0200352
0.0122664	0.0248268	-0.00541803	-0.00582509	-0.0536786	0.0936388	-0.040606	0.0484009	0.203816	-0.00365535	-0.031707	-0.0324176		0.0174701	0.0206741
0.0134471	0.0262906	-0.00617175	-0.00826219	-0.0588498	0.0959323	-0.0430691	0.0501987	0.208017	-0.00494601	-0.0336913	-0.0326076		0.0171907	0.0213143
0.0143558	0.0277824	-0.00694454	-0.0106156	-0.0638805	0.0980859	-0.0454503	0.0519287	0.212048	-0.00618282	-0.0355793	-0.0324983		0.0169208	0.0219316
0.0152867	0.0293828	-0.00757706	-0.0129628	-0.0686173	0.100214	-0.0477098	0.0535865	0.21591	-0.00742138	-0.037453	-0.0320535		0.0167154	0.0225245
0.0163694	0.030665	-0.00816355	-0.0152954	-0.0731047	0.102484	-0.0500187	0.0552271	0.219716	-0.00864265	-0.0392445	-0.0314287		0.0165469	0.0231104
0.0175487	0.031652	-0.00875432	-0.0176401	-0.077391	0.104697	-0.0524126	0.0568615	0.22328	-0.00994702	-0.0409197	-0.0306589		0.0163596	0.0236746
0.0188312	0.0323529	-0.00934499	-0.020155	-0.0814893	0.106889	-0.0549097	0.0583584	0.226555	-0.0113685	-0.042498	-0.0296595		0.0161301	0.0242152
0.0201716	0.0327159	-0.00991344	-0.0227859	-0.0852554	0.109228	-0.0575787	0.0595777	0.229629	-0.0128075	-0.0438417	-0.0286814		0.0158715	0.0247371
0.0215786	0.0328233	-0.0103964	-0.0255545	-0.0885615	0.111648	-0.0603784	0.0604694	0.232504	-0.0143212	-0.0449385	-0.0277699		0.0155919	0.0252339
0.0230577	0.0326166	-0.0106982	-0.0284409	-0.0914691	0.114155	-0.0632414	0.0611734	0.235284	-0.0159804	-0.0457891	-0.0265018		0.0153472	0.0257089
0.0246041	0.0321339	-0.0109503	-0.0313466	-0.0940175	0.1167	-0.0661386	0.0618277	0.237767	-0.0179778	-0.046431	-0.0248055		0.0151137	0.0261525
0.0264773	0.0313579	-0.0112044	-0.0342836	-0.0962364	0.119277	-0.069021	0.0623393	0.239862	-0.0204783	-0.0469109	-0.0228105		0.0148641	0.0265642
0.0288351	0.0304258	-0.0113737	-0.0373051	-0.0980486	0.122012	-0.0717835	0.0627475	0.241608	-0.0233581	-0.0472209	-0.0205959		0.0146619	0.0269488
0.0314558	0.029166	-0.0115717	-0.0404905	-0.0996368	0.124932	-0.0745031	0.0631812	0.243071	-0.0265959	-0.0474382	-0.0182203		0.0144459	0.0273253
0.0340738	0.0274316	-0.0118678	-0.0437598	-0.101178	0.128106	-0.0772758	0.0635668	0.244333	-0.0302674	-0.0475965	-0.0159245		0.0141368	0.0277114
0.0367682	0.025618	-0.0121794	-0.0471617	-0.102471	0.131441	-0.0798837	0.0639542	0.245239	-0.0341151	-0.0478035	-0.0136971		0.0138091	0.0280854
0.0395783	0.0236737	-0.0124838	-0.0507095	-0.103454	0.134736	-0.0823329	0.06437	0.246084	-0.0379297	-0.0480943	-0.011412		0.0135022	0.0284558
0.042453	0.0214491	-0.0127391	-0.054248	-0.104187	0.13795	-0.0846373	0.0648541	0.246988	-0.0419513	-0.0483519	-0.00922057		0.0131966	0.0288305
0.0456039	0.0190689	-0.0128407	-0.0578103	-0.104837	0.140962	-0.0865981	0.065557	0.247767	-0.0462701	-0.0487027	-0.00689422		0.0129172	0.0292008
0.0489197	0.0166667	-0.0129278	-0.0614848	-0.105408	0.14378	-0.088287	0.0664074	0.248382	-0.0507684	-0.0490944	-0.00448428		0.0126417	0.0295663
0.0522214	0.0141527	-0.0130787	-0.0653143	-0.105917	0.146565	-0.0897889	0.0673279	0.248818	-0.0554275	-0.0494979	-0.00190072		0.0123467	0.0299325
0.055356	0.0114804	-0.0131881	-0.0692961	-0.106399	0.149266	-0.0911605	0.0683882	0.24928	-0.0601176	-0.0500989	0.00114891		0.0120549	0.0303118
0.0581537	0.0088686	-0.0132606	-0.0734648	-0.106681	0.151774	-0.0924042	0.0696974	0.24964	-0.0647981	-0.0506695	0.00417385		0.0117524	0.0306856
0.0610092	0.00618002	-0.0132051	-0.0778727	-0.106935	0.154147	-0.0935649	0.0710695	0.249891	-0.0695643	-0.0511121	0.00716152		0.0114337	0.0310645
0.0639626	0.00338986	-0.0129719	-0.0825727	-0.107132	0.156449	-0.0947162	0.0723753	0.250097	-0.0744294	-0.0516047	0.0103273		0.0110978	0.0314585
0.0668561	0.000623214	-0.0125885	-0.0874609	-0.107212	0.158622	-0.0956943	0.0739397	0.250253	-0.0794466	-0.0521737	0.013594		0.010776	0.0318626
0.0698298	-0.00219997	-0.0121018	-0.0923089	-0.107293	0.160683	-0.0965935	0.075633	0.250555	-0.0846132	-0.0528353	0.016764		0.0104599	0.0322897
0.0729204	-0.00493932	-0.0116449	-0.0970949	-0.107297	0.162754	-0.0975101	0.0772993	0.250623	-0.0899287	-0.0537042	0.0198329		0.0101092	0.0327224
0.0761057	-0.00736663	-0.0111805	-0.10178	-0.107287	0.164913	-0.0984015	0.0790717	0.250395	-0.095314	-0.0548687	0.0230532		0.00977835	0.0331605
0.078902	-0.00963791	-0.0106109	-0.10621	-0.107179	0.167147	-0.0993405	0.0808889	0.250174	-0.100673	-0.0562035	0.0260576		0.00944292	0.0336018
0.0815089	-0.0119759	-0.0100102	-0.110195	-0.106947	0.169449	-0.10017	0.0830355	0.249919	-0.106161	-0.0577481	0.0289412		0.0091373	0.0340466
0.0846392	-0.0141945	-0.00944224	-0.113695	-0.106554	0.171789	-0.100793	0.0854398	0.249564	-0.111822	-0.0595287	0.0315106		0.00890942	0.0344959
0.0881187	-0.0162687	-0.00877602	-0.116765	-0.106016	0.1741	-0.101342	0.0877734	0.249148	-0.117567	-0.0613196	0.0332603		0.00869545	0.0349373
0.0915024	-0.0182593	-0.0079518	-0.119421	-0.105446	0.176364	-0.101827	0.090212	0.248746	-0.12332	-0.0631801	0.0349029		0.00852678	0.0353747
0.0944446	-0.0200655	-0.00706438	-0.121707	-0.104615	0.178439	-0.10211	0.0929055	0.248084	-0.129056	-0.0652812	0.0365763		0.0083792	0.0357798
0.0973726	-0.0216565	-0.00617632	-0.123634	-0.103593	0.180435	-0.102231	0.0959296	0.247139	-0.134644	-0.0675398	0.0380881		0.00829078	0.0361615
0.100374	-0.0230931	-0.00537249	-0.125323	-0.102433	0.182553	-0.10236	0.09914	0.245936	-0.140007	-0.069796	0.039625		0.00827042	0.0365329
0.102981	-0.0245491	-0.00466152	-0.126832	-0.101119	0.184604	-0.102391	0.102623	0.244302	-0.145386	-0.0720106	0.0414447		0.00825045	0.0368804
0.105391	-0.0261359	-0.00395477	-0.128097	-0.0997752	0.18657	-0.102125	0.10655	0.242563	-0.150725	-0.0741522	0.0435408		0.00830409	0.037222
0.107555	-0.0279731	-0.00328495	-0.129153	-0.0982673	0.188534	-0.101613	0.110783	0.240857	-0.156028	-0.076185	0.0452737		0.00837484	0.0375591
0.109735	-0.0298951	-0.00269634	-0.130062	-0.0966641	0.190479	-0.101009	0.115295	0.239037	-0.161392	-0.0782397	0.0467525		0.00844499	0.0379012
0.111944	-0.0317513	-0.00210445	-0.130902	-0.0950489	0.19228	-0.100445	0.119874	0.237122	-0.16661	-0.0802309	0.0481784		0.00852539	0.0382393
0.113551	-0.0336705	-0.00147157	-0.131691	-0.0933785	0.193767	-0.0999905	0.124637	0.235146	-0.171736	-0.0819475	0.0496298		0.00857049	0.0385587
0.114714	-0.0356018	-0.00083033	-0.132422	-0.091711	0.195095	-0.0994151	0.129785	0.233021	-0.176857	-0.0834958	0.051448		0.00864424	0.0388727
0.116001	-0.0377271	-0.000190293	-0.133047	-0.090152	0.196374	-0.0987161	0.135034	0.230698	-0.181921	-0.0850591	0.0533601		0.00872114	0.0391904
0.117531	-0.040084	0.00048428	-0.13334	-0.088785	0.197578	-0.0980664	0.140274	0.228345	-0.186812	-0.0866922	0.055139		0.00879768	0.0395123
0.11885	-0.0425442	0.00125084	-0.133095	-0.0874874	0.198564	-0.0972409	0.14549	0.225952	-0.191533	-0.0882592	0.0568106		0.00889649	0.0398066
0.119988	-0.0452384	0.00213227	-0.132431	-0.08624	0.199196	-0.0962925	0.150786	0.22352	-0.196234	-0.0898479	0.0585839		0.00899342	0.0400865
0.121077	-0.0480475	0.00318487	-0.131428	-0.0850693	0.199654	-0.0953344	0.156104	0.221087	-0.200936	-0.0916896	0.0603258		0.00907737	0.0403694
0.121915	-0.050884	0.00441218	-0.130193	-0.0837564	0.199886	-0.0942937	0.16121	0.218462	-0.205659	-0.0937105	0.0618073		0.00909963	0.0406296
0.122651	-0.053773	0.00578912	-0.12897	-0.0822589	0.199714	-0.0932139	0.166186	0.215548	-0.210331	-0.0958462	0.0635747		0.00908914	0.0408709
0.123181	-0.0566534	0.00732478	-0.127745	-0.0807302	0.199358	-0.0920279	0.171093	0.212391	-0.214926	-0.0980089	0.0656294		0.00907381	0.041101
0.123392	-0.0594673	0.00903869	-0.126579	-0.0791236	0.19899	-0.0907686	0.176006	0.209102	-0.219651	-0.100263	0.0677005		0.00903135	0.0413382
0.123487	-0.0621767	0.010893	-0.125525	-0.0774406	0.198579	-0.0894766	0.180847	0.205556	-0.22442	-0.10269	0.0698521		0.00895705	0.0415798
0.123678	-0.0649779	0.0127598	-0.12447	-0.0756998	0.198113	-0.0882148	0.185432	0.201664	-0.229101	-0.105217	0.0720276		0.0088327	0.0418147
0.123734	-0.0678322	0.0145528	-0.123462	-0.0738156	0.197554	-0.0869836	0.189999	0.197729	-0.233943	-0.107876	0.0745155		0.00868094	0.0420695
0.123279	-0.0705925	0.0161767	-0.122692	-0.0718707	0.196865	-0.0857917	0.194659	0.193827	-0.239173	-0.110515	0.0773314		0.00845857	0.0423529
0.1226	-0.0733555	0.0176964	-0.1223	-0.0699163	0.19597	-0.0848537	0.199208	0.189897	-0.244802	-0.113261	0.0800017		0.00807372	0.0426662
0.121943	-0.0760041	0.0192117	-0.12229	-0.067908	0.194913	-0.0839375	0.203535	0.185937	-0.250504	-0.116078	0.0822895		0.00759231	0.0429873
0.121339	-0.0784351	0.0207179	-0.122566	-0.065799	0.193756	-0.0828701	0.207646	0.181933	-0.25607	-0.118601	0.0843016		0.00711271	0.0432943
0.120973	-0.0805802	0.0221707	-0.122868	-0.0637532	0.192376	-0.081833	0.211565	0.177936	-0.261718	-0.120961	0.086292		0.00663337	0.0436023
0.120863	-0.0825658	0.0234286	-0.123061	-0.0619258	0.190821	-0.0808773	0.215336	0.174016	-0.267423	-0.123265	0.0883735		0.00614326	0.04392
0.120926	-0.0847053	0.0244751	-0.123133	-0.0601593	0.189026	-0.0799274	0.218965	0.170261	-0.273086	-0.125491	0.0906433		0.0056495	0.0442436
0.121253	-0.0871529	0.0254042	-0.123016	-0.0585004	0.186921	-0.0788352	0.222238	0.166633	-0.278722	-0.127535	0.0930992		0.00514896	0.044561
0.121737	-0.0899239	0.0262894	-0.122692	-0.05698	0.184662	-0.0776568	0.225292	0.163177	-0.28436	-0.129566	0.0955172		0.00462466	0.0448842
0.122277	-0.0925984	0.0271449	-0.122145	-0.0555225	0.182116	-0.0764766	0.228493	0.160013	-0.289983	-0.131774	0.0974972		0.00408681	0.0452144
0.123093	-0.0950493	0.028195	-0.121383	-0.0541468	0.179245	-0.0753117	0.23161	0.157045	-0.29539	-0.133874	0.0988413		0.00357294	0.0455228
0.124285	-0.0975128	0.0295503	-0.120295	-0.0527399	0.176104	-0.0740321	0.234455	0.154152	-0.300509	-0.135884	0.0998468		0.00311848	0.0458034
0.125763	-0.100008	0.0309321	-0.118701	-0.051294	0.172732	-0.0725308	0.237132	0.151201	-0.305467	-0.137849	0.100721		0.00271922	0.0460611
0.12736	-0.102678	0.0323928	-0.116482	-0.0499008	0.169135	-0.0709586	0.239603	0.148161	-0.310553	-0.139929	0.101701		0.00232093	0.046317
0.128973	-0.105686	0.0339542	-0.113834	-0.0485504	0.165197	-0.0693275	0.242063	0.145143	-0.315787	-0.142271	0.10303		0.0019087	0.0465933
0.130375	-0.109059	0.0355873	-0.111017	-0.0471742	0.161246	-0.0677136	0.244833	0.142202	-0.320959	-0.144697	0.104583		0.00151729	0.0468977
0.131513	-0.112536	0.0374555	-0.108035	-0.0457601	0.157343	-0.06611	0.247844	0.139315	-0.326192	-0.147158	0.106191		0.00115586	0.0472267
0.132532	-0.116034	0.0395489	-0.105075	-0.0444152	0.153233	-0.0644844	0.250999	0.136484	-0.331573	-0.149572	0.107775		0.000784914	0.0475772
0.133249	-0.119503	0.0418147	-0.10216	-0.043208	0.148929	-0.0629909	0.254472	0.133769	-0.336951	-0.152074	0.109216		0.000380307	0.0479484
0.134027	-0.122917	0.0441886	-0.0992007	-0.0419539	0.144432	-0.0616203	0.258156	0.131126	-0.342244	-0.15447	0.110502		2.18296e-06	0.04833
0.135269	-0.126567	0.0467136	-0.096303	-0.0405256	0.139849	-0.0604211	0.261769	0.128417	-0.347465	-0.156618	0.111994		-0.000324006	0.0487294
0.136785	-0.130297	0.0493027	-0.0935183	-0.0390961	0.13513	-0.0593128	0.265417	0.12565	-0.352743	-0.158804	0.113551		-0.000661405	0.049155
0.138539	-0.133999	0.0518504	-0.0909531	-0.0377056	0.130387	-0.0582442	0.269275	0.122958	-0.358181	-0.160883	0.114936		-0.00100171	0.0496142
0.140558	-0.137674	0.0544256	-0.088668	-0.0363522	0.125644	-0.0573685	0.273391	0.12043	-0.36352	-0.162818	0.116472		-0.00128997	0.0501046
0.142998	-0.141178	0.0569248	-0.0866973	-0.034989	0.120711	-0.0566366	0.277733	0.118169	-0.368498	-0.164597	0.117898		-0.00151354	0.050602
0.145979	-0.144494	0.0593173	-0.0849613	-0.0335124	0.115771	-0.0560953	0.282021	0.116164	-0.373116	-0.166201	0.118899		-0.00168562	0.0510918
0.149499	-0.147706	0.0616121	-0.0833762	-0.0319799	0.110643	-0.0556927	0.286072	0.114255	-0.377422	-0.167726	0.119716		-0.00184219	0.0515695
0.153599	-0.150941	0.0638054	-0.0819859	-0.0303817	0.105308	-0.0552466	0.289963	0.112382	-0.381533	-0.169196	0.12034		-0.00199052	0.0520468
0.158325	-0.153979	0.0659275	-0.0806926	-0.028655	0.100015	-0.054824	0.293672	0.110575	-0.385363	-0.170756	0.120599		-0.00209649	0.0525189
0.163617	-0.156932	0.0680385	-0.0795386	-0.026797	0.0946657	-0.0543939	0.297206	0.108848	-0.388826	-0.172362	0.120671		-0.00215026	0.0529846
0.16902	-0.159941	0.070242	-0.078678	-0.0250092	0.0893643	-0.0538549	0.300587	0.107085	-0.391941	-0.174193	0.120653		-0.00222223	0.0534466
0.174218	-0.162878	0.0724505	-0.078055	-0.0234001	0.0842829	-0.0530929	0.303791	0.105287	-0.394675	-0.176309	0.120337		-0.0023369	0.0538893
0.179321	-0.165863	0.0746298	-0.0775568	-0.0218279	0.0794303	-0.052196	0.306957	0.103482	-0.397074	-0.178473	0.119838		-0.00244456	0.054321
0.184516	-0.168868	0.0768709	-0.0771652	-0.0202443	0.0745612	-0.0513882	0.310084	0.101573	-0.399102	-0.180852	0.119171		-0.0025703	0.0547458
0.189879	-0.171981	0.0792073	-0.076887	-0.0186742	0.0695577	-0.0504602	0.313052	0.0996869	-0.400884	-0.183302	0.118192		-0.0027179	0.0551635
0.195213	-0.175083	0.0816092	-0.0767226	-0.0172293	0.064524	-0.0494305	0.315832	0.097795	-0.402573	-0.185687	0.11712		-0.00288607	0.0555746
0.200403	-0.177993	0.0840808	-0.0767336	-0.0159256	0.0594733	-0.0482933	0.318548	0.0957742	-0.404317	-0.1881	0.116026		-0.00308807	0.0559877
0.205602	-0.180794	0.0865874	-0.0768926	-0.0147203	0.054445	-0.0468538	0.321315	0.093759	-0.406177	-0.19046	0.114655		-0.00329451	0.0564109
0.210703	-0.183496	0.0889516	-0.0771077	-0.0135887	0.0493355	-0.0453804	0.324195	0.091817	-0.407974	-0.192853	0.113179		-0.00351821	0.0568379
0.215564	-0.186228	0.0910583	-0.0772983	-0.012469	0.0441765	-0.0438979	0.327314	0.089854	-0.409863	-0.195176	0.111951		-0.00375119	0.0572807
0.220438	-0.188739	0.0928186	-0.0773601	-0.0113741	0.0390813	-0.0423875	0.330488	0.0878608	-0.41188	-0.197387	0.110857		-0.00396527	0.0577296
0.225577	-0.190897	0.094317	-0.0772683	-0.0103172	0.0338134	-0.0408475	0.33365	0.0860255	-0.41405	-0.199373	0.109791		-0.0041315	0.058184
0.231219	-0.19285	0.0956302	-0.0770918	-0.00934128	0.0281427	-0.03924	0.337033	0.0843661	-0.416487	-0.200945	0.108746		-0.0042348	0.0586671
0.237197	-0.194398	0.0965806	-0.0769137	-0.00841049	0.0222322	-0.0377152	0.34058	0.0828556	-0.418937	-0.202316	0.107773		-0.0042893	0.0591594
0.243121	-0.195433	0.0971023	-0.0766411	-0.00753897	0.0163259	-0.0360962	0.344168	0.081561	-0.42128	-0.203501	0.106958		-0.00427126	0.0596356
0.249084	-0.195872	0.0972781	-0.0763012	-0.00675044	0.0105566	-0.0344381	0.347719	0.0804096	-0.423482	-0.204608	0.10624		-0.0041803	0.060094
0.255158	-0.195782	0.0971996	-0.0759726	-0.00593495	0.00498422	-0.032907	0.351268	0.0794127	-0.42551	-0.205626	0.105678		-0.0040026	0.0605412
0.261388	-0.195464	0.0969155	-0.0755254	-0.00516424	-0.000666444	-0.0314715	0.354963	0.0786344	-0.427249	-0.206462	0.105338		-0.00373032	0.0609846
0.267786	-0.194932	0.0966459	-0.0750724	-0.0044826	-0.0063435	-0.0301929	0.358651	0.0780521	-0.42858	-0.20731	0.105201		-0.00338155	0.0614205
0.274309	-0.194129	0.0964333	-0.0746268	-0.00391669	-0.0117483	-0.02897	0.362163	0.0776243	-0.429545	-0.208034	0.105071		-0.0029475	0.0618345
0.281041	-0.193132	0.096274	-0.0742318	-0.00347692	-0.0169819	-0.027735	0.365696	0.0773358	-0.430099	-0.208699	0.104739		-0.0024391	0.0622365
0.288034	-0.191965	0.0964339	-0.0741208	-0.00303915	-0.0220954	-0.0264909	0.369302	0.0771769	-0.430356	-0.209388	0.104281		-0.00185232	0.0626456
0.295111	-0.190649	0.096679	-0.0741555	-0.00257477	-0.027067	-0.0253216	0.372766	0.0771139	-0.430414	-0.210103	0.103816		-0.00123325	0.063049
0.302016	-0.189354	0.0968993	-0.0742165	-0.00207538	-0.03189	-0.0241763	0.375949	0.0772352	-0.430351	-0.211085	0.103464		-0.000631947	0.0634449
0.308958	-0.188326	0.0973418	-0.0743199	-0.00165458	-0.036684	-0.0228648	0.378854	0.0776737	-0.430348	-0.21227	0.103091		-4.58882e-05	0.063856
0.316011	-0.187708	0.0980421	-0.0745748	-0.00131805	-0.0415046	-0.0214496	0.381635	0.0783971	-0.430333	-0.213556	0.102525		0.000513771	0.0642879
0.32308	-0.18757	0.0989561	-0.074983	-0.000957275	-0.0463833	-0.0198562	0.384389	0.0792738	-0.430251	-0.214886	0.101925		0.00106144	0.064739
0.330237	-0.187726	0.0999402	-0.0753752	-0.000604636	-0.0514085	-0.0180166	0.387148	0.080242	-0.430237	-0.216311	0.101307		0.0015997	0.0652143
0.337423	-0.187939	0.101008	-0.0757804	-0.000253081	-0.0562745	-0.0161234	0.389817	0.0813747	-0.430315	-0.217919	0.10055		0.00213081	0.0657038
0.344391	-0.188261	0.102044	-0.0761411	7.48743e-05	-0.060989	-0.0140989	0.392416	0.0826814	-0.430528	-0.219515	0.0997328		0.00265058	0.0661957
0.351107	-0.188691	0.103126	-0.0764657	0.000443305	-0.0657357	-0.0117752	0.395029	0.0840702	-0.430904	-0.221024	0.0989415		0.00317676	0.0666933
0.357779	-0.189314	0.104386	-0.0767137	0.000766602	-0.0703448	-0.00923829	0.397457	0.0856954	-0.431255	-0.222467	0.0980752		0.00373549	0.0671893
0.364376	-0.19014	0.105477	-0.0767286	0.000886537	-0.0748153	-0.00649855	0.399768	0.0876691	-0.43154	-0.223796	0.0972504		0.00432577	0.0676791
0.371126	-0.190958	0.106576	-0.076674	0.000834951	-0.0791665	-0.00355512	0.402181	0.089821	-0.431771	-0.225021	0.0965745		0.00499739	0.0681811
0.377911	-0.191787	0.107831	-0.0766038	0.000576809	-0.0833148	-0.000558316	0.404762	0.0920467	-0.431871	-0.226048	0.0959626		0.00574226	0.0686871
0.384682	-0.192575	0.109052	-0.0764401	0.000227142	-0.0872156	0.00240039	0.407427	0.0941983	-0.431851	-0.226862	0.09546		0.00654191	0.0691859
0.391795	-0.19319	0.11033	-0.0762417	-0.000183221	-0.0909237	0.00531861	0.410135	0.0962796	-0.431844	-0.22755	0.0952424		0.00743068	0.0696998
0.398848	-0.193698	0.111725	-0.076048	-0.000744321	-0.0944509	0.00813718	0.413016	0.0985097	-0.43203	-0.228178	0.095478		0.00838039	0.0702337
0.405878	-0.194275	0.113258	-0.0758721	-0.00142594	-0.0977889	0.0108197	0.415952	0.100926	-0.432378	-0.228739	0.0957771		0.00934429	0.0707827
0.413094	-0.194878	0.114894	-0.0757205	-0.00227303	-0.10104	0.0134898	0.418882	0.103472	-0.432755	-0.2291	0.0959328		0.0103333	0.0713405
0.420529	-0.195383	0.116751	-0.075614	-0.00325656	-0.104216	0.0160643	0.421952	0.106042	-0.43302	-0.229501	0.0960935		0.0113703	0.0719135
0.428306	-0.19581	0.118782	-0.0756099	-0.0043103	-0.107369	0.0183048	0.425173	0.108584	-0.433137	-0.230108	0.0962213		0.0124188	0.0725103
0.436123	-0.195924	0.120828	-0.0757799	-0.0053858	-0.110564	0.0202628	0.428469	0.111045	-0.433264	-0.23075	0.096496		0.0134631	0.0731132
0.44397	-0.195945	0.123075	-0.0761189	-0.00644199	-0.113793	0.0220778	0.431921	0.113386	-0.433344	-0.231464	0.0968305		0.0145126	0.073729
0.451882	-0.196229	0.125431	-0.0765451	-0.00744501	-0.11706	0.0237828	0.435578	0.115694	-0.433374	-0.232223	0.0971195		0.0155508	0.0743662
0.459953	-0.196614	0.127777	-0.0770579	-0.00835338	-0.120349	0.0253726	0.439289	0.117934	-0.433394	-0.23302	0.0974058		0.0165786	0.0750191
0.46797	-0.197149	0.130238	-0.0776133	-0.00930654	-0.123656	0.026878	0.443128	0.120188	-0.43324	-0.233921	0.0976977		0.0176012	0.0756787
0.475648	-0.197706	0.132698	-0.0781631	-0.0102881	-0.126906	0.0283561	0.447042	0.12247	-0.432851	-0.234985	0.0980523		0.018614	0.0763238
0.483374	-0.198283	0.135023	-0.0787535	-0.0111715	-0.130046	0.0298712	0.450899	0.124557	-0.43209	-0.236135	0.0982509		0.0196247	0.0769517
0.491078	-0.199012	0.137352	-0.0793811	-0.0120279	-0.133094	0.031493	0.454771	0.126454	-0.430995	-0.237244	0.0984006		0.0206495	0.0775669
0.498769	-0.199776	0.139705	-0.0801846	-0.0127634	-0.136081	0.03324	0.458618	0.128184	-0.429862	-0.238415	0.0986841		0.0216765	0.0781848
0.50659	-0.200753	0.14191	-0.0811665	-0.0133705	-0.139002	0.0351019	0.462468	0.129854	-0.428734	-0.239436	0.0989704		0.0227028	0.0788115
0.51427	-0.201991	0.144031	-0.0821005	-0.013985	-0.14183	0.0371489	0.466335	0.131532	-0.427591	-0.24019	0.0993059		0.0237446	0.0794318
0.52218	-0.203562	0.14608	-0.0829598	-0.01462	-0.144566	0.0394087	0.47015	0.133134	-0.426441	-0.240901	0.0996225		0.0247939	0.0800661
0.530438	-0.205515	0.147968	-0.0837493	-0.015389	-0.147079	0.0416194	0.473938	0.134698	-0.425291	-0.24165	0.0998093		0.0258165	0.0807213
0.538807	-0.207488	0.149751	-0.0845416	-0.0163627	-0.149335	0.043673	0.47767	0.136169	-0.424126	-0.242511	0.0998594		0.026797	0.0813789
0.547432	-0.209292	0.15136	-0.0854538	-0.0174505	-0.151344	0.0457605	0.48123	0.137612	-0.422946	-0.24347	0.099651		0.0277574	0.0820369
0.556353	-0.210979	0.152742	-0.0864954	-0.0185838	-0.153134	0.0479016	0.484594	0.138965	-0.42183	-0.244432	0.0992624		0.0286969	0.082698
0.565583	-0.212715	0.154026	-0.08758	-0.0198794	-0.154905	0.050036	0.487874	0.140115	-0.420866	-0.2452	0.0986654		0.0295961	0.0833734
0.574669	-0.214562	0.15532	-0.0886788	-0.0213409	-0.156635	0.0520865	0.491304	0.141235	-0.420129	-0.245746	0.0976915		0.0304346	0.0840557
0.583237	-0.216538	0.156534	-0.0898952	-0.0228574	-0.158226	0.054033	0.494928	0.14231	-0.419386	-0.246193	0.0966344		0.0312151	0.0847216
0.591339	-0.218673	0.157518	-0.0909992	-0.0244583	-0.159733	0.0559933	0.498611	0.143398	-0.418507	-0.246485	0.0957709		0.0319812	0.085361
0.59919	-0.220711	0.158339	-0.092004	-0.0260227	-0.161252	0.0579706	0.502337	0.144529	-0.417627	-0.246812	0.0951291		0.0327554	0.0859903
0.607317	-0.222596	0.159115	-0.0931922	-0.0275597	-0.162768	0.0599025	0.50612	0.145569	-0.416711	-0.247233	0.0945684		0.0335442	0.086637
0.615342	-0.224412	0.159851	-0.0944306	-0.0291183	-0.16427	0.061775	0.510116	0.146526	-0.415799	-0.247612	0.0941045		0.0343395	0.0872874
0.622919	-0.226022	0.16051	-0.0957135	-0.0305168	-0.165924	0.0637097	0.514183	0.147511	-0.414985	-0.248007	0.0938243		0.0351241	0.0879231
0.630365	-0.227622	0.161089	-0.0970318	-0.0317574	-0.167707	0.0657708	0.518178	0.148496	-0.414139	-0.248338	0.0933672		0.0358893	0.0885489
0.637429	-0.229362	0.161673	-0.0982406	-0.0328882	-0.169597	0.067771	0.522285	0.149324	-0.413109	-0.248527	0.0929003		0.0366383	0.0891533
0.644253	-0.231188	0.162255	-0.0993864	-0.0338525	-0.171626	0.0697085	0.526518	0.150197	-0.412012	-0.248579	0.0925718		0.037405	0.0897505
0.650977	-0.233021	0.1628	-0.100525	-0.0345849	-0.173643	0.0716846	0.53086	0.151117	-0.410867	-0.248736	0.0919983		0.0381717	0.0903476
0.657636	-0.234671	0.163309	-0.101585	-0.0351082	-0.175635	0.0736742	0.535079	0.15188	-0.409568	-0.249106	0.0914281		0.0389444	0.0909291
0.66482	-0.236329	0.163778	-0.102503	-0.0355645	-0.177708	0.0756462	0.539341	0.152501	-0.408235	-0.249436	0.0909667		0.0397731	0.0915376
0.67213	-0.237926	0.164282	-0.103356	-0.0360376	-0.179788	0.0774345	0.543686	0.152897	-0.406916	-0.249777	0.0902814		0.040576	0.092154
0.6795	-0.239748	0.164838	-0.104151	-0.0365861	-0.181741	0.0791205	0.547919	0.153082	-0.405572	-0.25009	0.0891706		0.0413119	0.0927689
0.686917	-0.241996	0.165396	-0.10486	-0.0370634	-0.183561	0.0807941	0.55204	0.153166	-0.404296	-0.250364	0.0877956		0.0419973	0.0933896
0.694142	-0.244237	0.165955	-0.10557	-0.0373883	-0.185229	0.0823555	0.55589	0.153032	-0.40304	-0.250739	0.0863134		0.0426238	0.093988
0.701574	-0.24677	0.166514	-0.106284	-0.0377662	-0.186631	0.0838721	0.559727	0.152537	-0.40169	-0.251079	0.0847216		0.0432271	0.0945936
0.708403	-0.249399	0.167049	-0.106912	-0.038184	-0.187846	0.0852494	0.563368	0.151968	-0.400446	-0.251286	0.0834171		0.0437818	0.0951601
0.715668	-0.252391	0.167712	-0.107591	-0.0387056	-0.18911	0.0867348	0.567185	0.15125	-0.399322	-0.25145	0.0820438		0.0443354	0.0957732
0.722684	-0.255439	0.168454	-0.10825	-0.0392338	-0.190225	0.0881875	0.570897	0.150319	-0.398277	-0.251645	0.0806198		0.044841	0.096372
0.729335	-0.258571	0.169185	-0.108843	-0.0398175	-0.191204	0.08946	0.574422	0.149342	-0.397269	-0.251699	0.0795497		0.0453242	0.0969428
0.737724	-0.262715	0.170007	-0.109584	-0.0407179	-0.192262	0.090968	0.578564	0.148193	-0.396205	-0.251631	0.0782946		0.0458863	0.0976591
0.742995	-0.265348	0.170504	-0.110061	-0.041317	-0.192867	0.0919211	0.58108	0.147478	-0.395602	-0.251612	0.0774317		0.0462169	0.0981097

## Sheet: noise minus 10 x
fly1	fly2	fly3	fly4	fly5	fly6	fly7	fly8	fly9	fly10	fly11	fly12		Avg	SEM
-5.5868e-07	2.70748e-07	2.70939e-07	-4.60808e-08	-4.8436e-05	-2.62351e-07	-1.15079e-07	-1.10732e-06	6.98077e-07	1.85116e-07	4.90935e-07	7.24884e-05		1.9899e-06	7.56569e-06
-1.10259e-06	-4.2504e-07	-3.9224e-07	-1.50516e-07	-8.23198e-05	3.07034e-07	1.69786e-07	8.59479e-07	-7.27361e-07	-2.03228e-07	-2.00313e-07	0.000260174		1.46658e-05	2.3337e-05
-1.93704e-06	4.92662e-07	3.86712e-07	3.6745e-07	-0.000160714	-2.61545e-07	-1.67898e-07	-1.10325e-06	5.31601e-07	1.57697e-07	-2.45528e-07	0.000413296		2.09002e-05	3.80796e-05
-2.73198e-06	-3.84201e-07	-7.88083e-07	-4.264e-07	-0.000225214	1.02044e-07	2.31199e-07	2.20759e-07	-7.3359e-08	-3.70538e-08	8.11125e-07	0.000553334		2.7087e-05	5.13532e-05
3.68906e-06	1.28806e-07	-7.5122e-08	7.1524e-07	-0.000229882	1.62338e-07	-1.02461e-07	4.79343e-07	-4.94631e-07	-1.48863e-07	-1.27739e-06	0.000675282		3.7373e-05	6.1058e-05
9.55653e-05	2.69542e-07	-9.29465e-07	-1.36346e-06	-0.000232343	-4.59851e-07	-3.96437e-07	-3.1694e-06	1.2529e-06	3.62517e-07	1.8342e-06	0.000791213		5.43197e-05	7.03748e-05
0.000214004	-4.56888e-07	-1.03766e-06	-8.18142e-07	-0.000229053	7.15078e-07	-8.59036e-07	3.94466e-05	-2.177e-06	-5.26325e-07	-2.08559e-06	0.00089622		7.61144e-05	7.94642e-05
0.000330822	7.32554e-07	-3.01288e-06	-3.66691e-06	-0.000231555	-7.71333e-07	-3.56333e-06	7.37453e-05	1.61595e-06	5.85556e-07	-1.03476e-07	0.00102169		9.88764e-05	9.10822e-05
0.000552428	-2.18599e-06	1.0404e-05	-5.38448e-06	-0.000230597	7.82014e-07	-3.5012e-06	6.46063e-05	-3.87371e-06	-4.65686e-07	-2.47147e-06	0.00120916		0.000132409	0.00011059
0.000768563	-6.27224e-07	8.10101e-05	-7.20177e-06	-0.000230162	-6.67547e-07	-9.67547e-06	6.72537e-05	-1.30908e-06	2.6045e-07	-6.87825e-06	0.001439		0.000174964	0.000133664
0.00102073	-5.55508e-06	0.000146226	-1.48663e-05	-0.000231131	-2.86023e-07	-1.93905e-06	6.53083e-05	-5.99665e-06	1.55361e-07	-3.82321e-06	0.00191733		0.000240512	0.00017631
0.00144245	-4.89995e-06	0.000217545	0.000106585	-0.000197783	-5.50013e-07	7.97542e-05	5.76832e-05	-8.55299e-06	-1.23284e-06	-2.19066e-05	0.00263984		0.000359077	0.000240111
0.00202746	-1.31023e-05	0.000369716	0.000421142	-0.000199855	-4.61238e-06	0.000302073	7.91776e-05	6.41101e-05	5.14249e-07	5.70225e-05	0.00356407		0.000555643	0.000320598
0.00282419	1.06343e-05	0.000627172	0.000891057	-0.000179637	-1.94877e-06	0.000746694	0.000167578	0.000185269	-3.64166e-06	0.000306692	0.00482267		0.000866394	0.000427823
0.00388435	0.000227186	0.00113338	0.00158776	-7.4087e-05	-1.47503e-05	0.00142589	0.000364922	0.000442438	-3.52341e-08	0.000745079	0.00653515		0.00135477	0.000567768
0.00536356	0.000593432	0.00193549	0.00253737	2.43619e-05	2.50556e-05	0.00227985	0.000714213	0.000879799	-7.86666e-06	0.00141822	0.00897481		0.00206153	0.000765484
0.00716967	0.00113158	0.00303268	0.0038318	0.000159726	0.00012427	0.00339229	0.00125361	0.00155853	7.94754e-06	0.002473	0.0121906		0.00302714	0.0010183
0.00938252	0.00198218	0.00446368	0.00564494	0.000325627	0.000302424	0.00494735	0.00208603	0.00259569	0.000100392	0.00414937	0.016272		0.00435435	0.00133142
0.0121616	0.00312738	0.00624834	0.00795281	0.000517983	0.000768899	0.00693979	0.00340453	0.00389237	0.000249504	0.00642664	0.0213313		0.0060851	0.00171399
0.0152868	0.00468448	0.00845224	0.0107619	0.000896602	0.00152634	0.00940301	0.00519673	0.00553661	0.000485245	0.00931161	0.0272087		0.00822919	0.00214391
0.0190097	0.00668179	0.0110634	0.0142054	0.00157334	0.00253472	0.0124297	0.00746433	0.00763559	0.000795572	0.0128114	0.0340932		0.0108582	0.00263992
0.0233832	0.0089963	0.0141557	0.0182529	0.00255703	0.00387252	0.0159113	0.0103418	0.010262	0.00124722	0.0170437	0.0420193		0.0140036	0.00320119
0.028233	0.0116316	0.0177881	0.022881	0.0038947	0.00556221	0.0198677	0.0138345	0.0134845	0.00190416	0.0222876	0.0505438		0.0176594	0.00379313
0.0336029	0.0146968	0.0219976	0.0281912	0.00568575	0.00768195	0.0241215	0.0180172	0.0172406	0.00273953	0.0285665	0.0597414		0.0218569	0.00441993
0.0394442	0.018347	0.0267117	0.0342034	0.00788596	0.0103473	0.0284449	0.0229179	0.0217277	0.00384753	0.0359173	0.0698868		0.0266401	0.00509322
0.0459003	0.0225411	0.0316145	0.0408499	0.0104945	0.0137195	0.0330872	0.0285107	0.0270104	0.00522935	0.0443792	0.0804149		0.0319793	0.00578005
0.0527342	0.027278	0.0367912	0.0481388	0.0135809	0.0177661	0.0380967	0.0348334	0.0330768	0.00687801	0.0539107	0.091014		0.0378416	0.00645978
0.0598549	0.0325926	0.0423281	0.0560317	0.0171523	0.0224147	0.0433236	0.0418786	0.0399805	0.00868501	0.0643014	0.101954		0.0442081	0.00715327
0.0675696	0.0383269	0.0480909	0.0643595	0.0212967	0.0277193	0.0486714	0.0496022	0.0476449	0.0105811	0.0754414	0.113039		0.0510286	0.00785519
0.0758272	0.04445	0.0541531	0.0732348	0.0259842	0.0334737	0.0541633	0.0580192	0.0561838	0.0129367	0.0873846	0.124265		0.0583396	0.008562
0.0846566	0.0508987	0.0604688	0.0827695	0.031063	0.0397374	0.0597894	0.0671937	0.0655909	0.0157625	0.100008	0.135697		0.0661363	0.00928349
0.0939841	0.0577404	0.0669864	0.0929147	0.0365288	0.0466467	0.0654089	0.0769871	0.0756929	0.0187421	0.113291	0.146999		0.0743268	0.0100126
0.103688	0.0650777	0.0736604	0.103698	0.0424514	0.0540536	0.0711151	0.0874027	0.0862119	0.0218335	0.127096	0.158093		0.0828651	0.0107458
0.1138	0.0726598	0.0804159	0.11475	0.0487789	0.0620245	0.0768215	0.0985446	0.0970282	0.0250259	0.141441	0.16947		0.09173	0.0115131
0.124199	0.0805474	0.0870778	0.125959	0.0555537	0.0704555	0.0825151	0.110345	0.108439	0.0283495	0.156393	0.181165		0.100917	0.012318
0.134765	0.0886781	0.0934495	0.137618	0.0628203	0.0791847	0.088321	0.122773	0.120441	0.0317564	0.17178	0.192926		0.110376	0.013153
0.145335	0.0967471	0.0997307	0.1496	0.0704798	0.0880384	0.0940042	0.135715	0.132688	0.0352279	0.187732	0.205479		0.120065	0.0140636
0.155839	0.104813	0.105836	0.161778	0.0784888	0.0968604	0.0996545	0.149137	0.145015	0.0389324	0.204321	0.218593		0.129939	0.0150317
0.16637	0.112792	0.111596	0.174081	0.0867914	0.105787	0.10539	0.16298	0.157517	0.042934	0.221528	0.231673		0.139953	0.0160281
0.176586	0.120712	0.117077	0.186663	0.0955169	0.114765	0.111054	0.177091	0.170025	0.0471119	0.239336	0.245173		0.150093	0.0170736
0.186334	0.128711	0.122131	0.199644	0.104779	0.123826	0.116731	0.191411	0.182177	0.0511375	0.257701	0.258947		0.160294	0.0181685
0.195934	0.136783	0.126743	0.212687	0.114455	0.132906	0.122342	0.206038	0.194158	0.0549518	0.276764	0.273002		0.170564	0.0193305
0.205132	0.144895	0.130883	0.225603	0.124469	0.141925	0.12788	0.220932	0.206357	0.0588452	0.296401	0.287542		0.180905	0.0205528
0.213798	0.153208	0.134534	0.238501	0.134657	0.151015	0.133673	0.235809	0.219	0.0629553	0.316325	0.302837		0.191359	0.0218209
0.222156	0.161914	0.137683	0.251654	0.14491	0.159973	0.139803	0.250612	0.232133	0.0672651	0.336335	0.319006		0.201954	0.0231383
0.230306	0.170628	0.140441	0.265059	0.155195	0.168858	0.146328	0.265064	0.245234	0.0716862	0.356156	0.335383		0.212528	0.0244628
0.238351	0.179365	0.143162	0.278733	0.165342	0.177831	0.153306	0.279173	0.257815	0.0763578	0.375908	0.351848		0.223099	0.0257752
0.246083	0.188338	0.145833	0.29286	0.175277	0.18679	0.160767	0.293218	0.270096	0.0814654	0.395495	0.368446		0.233722	0.0270719
0.253734	0.197496	0.148418	0.30731	0.185122	0.195806	0.168733	0.306931	0.282204	0.0868113	0.414449	0.385187		0.24435	0.0283337
0.261413	0.20687	0.150912	0.3221	0.194938	0.204963	0.177051	0.320445	0.294127	0.0923456	0.433048	0.402325		0.255045	0.0295878
0.268791	0.216079	0.153304	0.336952	0.204645	0.214161	0.185709	0.333812	0.306302	0.098114	0.451605	0.419565		0.265753	0.0308432
0.275953	0.224977	0.155542	0.351316	0.214331	0.223341	0.194685	0.346773	0.3189	0.104079	0.47005	0.436469		0.276368	0.0320729
0.282675	0.23372	0.15746	0.365348	0.224166	0.232651	0.204124	0.359402	0.331519	0.110476	0.48822	0.452873		0.286886	0.03325
0.288999	0.242305	0.159125	0.379462	0.234236	0.241929	0.214035	0.3717	0.343867	0.117235	0.506152	0.468526		0.297298	0.0343751
0.295076	0.250515	0.160562	0.39358	0.244629	0.251128	0.224048	0.383722	0.355927	0.124156	0.524233	0.482982		0.307546	0.035466
0.300683	0.258318	0.161805	0.407428	0.255366	0.260464	0.234176	0.395512	0.367626	0.131321	0.542275	0.496323		0.317608	0.0365079
0.305836	0.265813	0.16285	0.420981	0.266374	0.269899	0.244374	0.40732	0.379098	0.138729	0.560273	0.509059		0.32755	0.037528
0.310535	0.272819	0.163618	0.434242	0.277576	0.279419	0.254523	0.419048	0.390687	0.146291	0.578135	0.521454		0.337362	0.0385473
0.3149	0.279515	0.163887	0.44727	0.288999	0.28905	0.264677	0.430105	0.40243	0.153818	0.595637	0.533666		0.346996	0.039565
0.318744	0.285758	0.163529	0.460188	0.300811	0.298886	0.274757	0.440678	0.414229	0.161417	0.613239	0.545867		0.356509	0.0406176
0.321935	0.291397	0.162762	0.472896	0.313148	0.308943	0.284739	0.450878	0.425858	0.16924	0.630362	0.557697		0.365821	0.0416541
0.324791	0.297157	0.161619	0.485416	0.325805	0.319305	0.294621	0.46076	0.437036	0.177235	0.64656	0.568922		0.374936	0.0426358
0.327318	0.303173	0.16013	0.498121	0.338662	0.329948	0.304503	0.470686	0.447799	0.185403	0.662148	0.580292		0.384015	0.0436156
0.329599	0.309038	0.158278	0.511099	0.351878	0.340722	0.314354	0.480324	0.458115	0.193755	0.677076	0.591877		0.39301	0.0445972
0.331772	0.314864	0.156146	0.524044	0.36523	0.351857	0.324103	0.489627	0.467868	0.202459	0.691711	0.603419		0.401925	0.0455716
0.333848	0.320757	0.153904	0.536916	0.378506	0.363229	0.333798	0.498856	0.477185	0.211404	0.705799	0.615064		0.410772	0.0465339
0.335739	0.326591	0.151427	0.549918	0.392007	0.374842	0.343385	0.50793	0.486199	0.220593	0.719023	0.626694		0.419529	0.0474773
0.337385	0.332454	0.148788	0.563074	0.406053	0.386808	0.353043	0.516849	0.494878	0.230195	0.731882	0.638725		0.428344	0.0484285
0.338976	0.338364	0.146008	0.576154	0.420342	0.398919	0.362787	0.525479	0.503129	0.240096	0.744633	0.651038		0.43716	0.049393
0.340529	0.344242	0.143167	0.589097	0.434468	0.411315	0.37248	0.533861	0.5109	0.250226	0.757293	0.663203		0.445899	0.0503581
0.342084	0.350224	0.140564	0.601976	0.448573	0.423857	0.382225	0.542024	0.518199	0.260404	0.769871	0.674999		0.454583	0.0513074
0.343644	0.356436	0.138152	0.614623	0.462563	0.436404	0.392035	0.549933	0.524926	0.270812	0.78267	0.686157		0.463196	0.0522361
0.345089	0.362609	0.135732	0.626956	0.476548	0.44901	0.401772	0.557647	0.531049	0.281628	0.795592	0.697335		0.471747	0.0531715
0.346428	0.368644	0.133379	0.639026	0.490744	0.461722	0.411227	0.564947	0.536676	0.292669	0.808137	0.708688		0.480191	0.0541007
0.347642	0.374778	0.131497	0.65086	0.504895	0.474609	0.420545	0.572034	0.541863	0.303879	0.820356	0.720115		0.488589	0.0550034
0.348783	0.380817	0.130012	0.662352	0.519206	0.487496	0.429848	0.579017	0.546713	0.315275	0.832187	0.731799		0.496959	0.055887
0.349791	0.386881	0.128486	0.673519	0.533783	0.500536	0.438874	0.58564	0.551044	0.327015	0.843569	0.743784		0.505244	0.0567672
0.350671	0.393377	0.126922	0.684477	0.548361	0.513679	0.447496	0.591827	0.55482	0.339029	0.854805	0.755974		0.513453	0.0576533
0.351518	0.400235	0.125261	0.694974	0.562799	0.526786	0.455788	0.597443	0.558283	0.351203	0.865582	0.767588		0.521455	0.0585055
0.352123	0.407576	0.12348	0.704921	0.577393	0.539918	0.463952	0.602977	0.561251	0.363551	0.875779	0.77847		0.529283	0.0593201
0.352397	0.415378	0.121734	0.714266	0.592531	0.552782	0.471955	0.608856	0.563682	0.376195	0.885896	0.788727		0.537033	0.0601218
0.352426	0.423565	0.119788	0.722989	0.607982	0.565492	0.47976	0.614914	0.565634	0.389272	0.895734	0.798757		0.544693	0.0609229
0.352277	0.4324	0.117506	0.731479	0.623785	0.578275	0.487514	0.621051	0.567235	0.402462	0.905122	0.809199		0.552359	0.0617547
0.351888	0.441623	0.115162	0.739858	0.639749	0.591074	0.495066	0.627012	0.568741	0.415683	0.914392	0.819554		0.559983	0.0626106
0.351321	0.451123	0.11269	0.748028	0.655457	0.603894	0.502277	0.632868	0.570046	0.429101	0.923752	0.829512		0.567506	0.0634867
0.350716	0.461099	0.109747	0.755986	0.671183	0.616538	0.509134	0.638602	0.571234	0.44265	0.933253	0.839215		0.574947	0.0644051
0.349945	0.471371	0.106413	0.763681	0.687014	0.628855	0.515615	0.644045	0.572326	0.456257	0.942926	0.848975		0.582285	0.0653781
0.349219	0.481855	0.102964	0.77093	0.702983	0.640903	0.521867	0.649579	0.573143	0.469958	0.95318	0.85881		0.589616	0.0664015
0.348665	0.492195	0.0994876	0.777802	0.718918	0.652717	0.52822	0.655361	0.573645	0.483804	0.96428	0.868326		0.596952	0.0674671
0.348148	0.502288	0.0959694	0.784589	0.734577	0.66414	0.534579	0.661271	0.573861	0.497759	0.975994	0.87732		0.604208	0.0685653
0.347796	0.512235	0.0923898	0.791259	0.750314	0.675174	0.540526	0.667058	0.57395	0.511909	0.987973	0.88561		0.611349	0.0696759
0.347784	0.521878	0.0886641	0.797866	0.76623	0.686149	0.546184	0.672587	0.573965	0.526319	1.00012	0.893454		0.618433	0.0708066
0.348011	0.531449	0.0848959	0.804365	0.782138	0.696995	0.551565	0.678026	0.573968	0.541014	1.01262	0.901042		0.625507	0.0719607
0.348435	0.540877	0.0815193	0.810528	0.797888	0.707453	0.556526	0.683467	0.573851	0.555947	1.02535	0.908287		0.632511	0.0731017
0.349336	0.550424	0.0785751	0.816634	0.813704	0.717521	0.56148	0.688976	0.573389	0.571158	1.03808	0.914846		0.63951	0.0742045
0.350518	0.560163	0.075815	0.822777	0.829863	0.727192	0.566754	0.694298	0.57271	0.58671	1.05112	0.920433		0.646529	0.0752956
0.351911	0.569662	0.0731564	0.828671	0.845896	0.736642	0.572154	0.699645	0.57182	0.602399	1.06464	0.925127		0.653477	0.0763885
0.353585	0.579255	0.0704268	0.834614	0.861691	0.745983	0.577667	0.705483	0.570723	0.618203	1.07844	0.928754		0.660402	0.0774818
0.355314	0.588888	0.0675782	0.840776	0.87742	0.755047	0.583355	0.711325	0.569559	0.634242	1.09243	0.931629		0.667297	0.0785923
0.35733	0.598583	0.0646733	0.846833	0.892976	0.763841	0.588816	0.717253	0.568283	0.650573	1.1063	0.934164		0.674135	0.0797039
0.359597	0.608509	0.0615978	0.852922	0.908673	0.772513	0.594148	0.72353	0.566966	0.66701	1.12002	0.936698		0.681016	0.080841
0.362031	0.618642	0.0583599	0.859243	0.924538	0.781137	0.599745	0.730032	0.565565	0.683418	1.13405	0.939485		0.68802	0.0820307
0.364596	0.629192	0.0552027	0.865762	0.940127	0.78959	0.605373	0.737077	0.564068	0.69998	1.14812	0.942273		0.695113	0.0832331
0.367347	0.639836	0.0519964	0.872627	0.955329	0.797711	0.61098	0.744501	0.562708	0.716612	1.16228	0.945		0.702244	0.0844511
0.370596	0.650289	0.0482149	0.879966	0.970369	0.805465	0.616922	0.752265	0.561562	0.733435	1.17693	0.947655		0.709472	0.0857253
0.374221	0.660237	0.0437799	0.887504	0.985488	0.812824	0.623098	0.760585	0.560822	0.750652	1.19195	0.95057		0.716811	0.0870675
0.378272	0.669568	0.038951	0.895032	1.00065	0.819863	0.629149	0.769537	0.56043	0.76813	1.20756	0.953992		0.724261	0.0884745
0.382651	0.678681	0.0339379	0.902703	1.01585	0.826688	0.635206	0.779258	0.560148	0.785965	1.22339	0.957945		0.731869	0.0899249
0.387412	0.687585	0.0289608	0.910438	1.03123	0.833351	0.641271	0.78933	0.560155	0.803899	1.23871	0.962545		0.739574	0.0913729
0.392708	0.696371	0.0239342	0.918293	1.04693	0.839735	0.647198	0.799673	0.560468	0.821635	1.2535	0.967192		0.747304	0.0928071
0.398138	0.705206	0.0187792	0.926288	1.06312	0.845716	0.652949	0.810218	0.561089	0.839538	1.26768	0.971839		0.755047	0.0942449
0.403719	0.713888	0.0136917	0.934199	1.07934	0.851262	0.658476	0.820698	0.562107	0.857533	1.28175	0.976906		0.762798	0.0956848
0.409603	0.722328	0.008592	0.942144	1.09539	0.856288	0.66406	0.83135	0.563578	0.875398	1.29592	0.982256		0.770576	0.0971257
0.41595	0.730757	0.00332543	0.950019	1.11185	0.860987	0.669805	0.842143	0.565418	0.893386	1.31019	0.987638		0.778455	0.098583
0.422587	0.73914	-0.00200751	0.957719	1.12896	0.865469	0.675611	0.852948	0.567211	0.911652	1.32468	0.99295		0.78641	0.100075
0.428945	0.74736	-0.00731946	0.965322	1.14659	0.869714	0.68131	0.863627	0.569015	0.930208	1.33917	0.998457		0.794366	0.101604
0.435061	0.755803	-0.0125877	0.972878	1.16437	0.873824	0.686848	0.87434	0.57088	0.948909	1.35378	1.00375		0.802321	0.103157
0.441157	0.764682	-0.0177948	0.980622	1.18236	0.877679	0.692354	0.885174	0.572795	0.967585	1.36793	1.00848		0.810252	0.104699
0.447411	0.773836	-0.0229668	0.988639	1.20088	0.881261	0.697735	0.895732	0.574854	0.986425	1.3817	1.01267		0.818181	0.10624
0.453804	0.782949	-0.0281192	0.996972	1.21966	0.884673	0.703034	0.906315	0.576819	1.00561	1.39608	1.01591		0.826144	0.107821
0.460183	0.791796	-0.0331113	1.00559	1.23843	0.887853	0.708514	0.91724	0.578866	1.02445	1.41098	1.01884		0.834135	0.109421
0.466657	0.80063	-0.0379242	1.01442	1.25724	0.890777	0.714544	0.928513	0.580872	1.04248	1.42654	1.02196		0.842226	0.111041
0.473307	0.809955	-0.0427206	1.02341	1.27647	0.893552	0.72097	0.940281	0.582606	1.06056	1.44249	1.02482		0.850475	0.112699
0.48001	0.81985	-0.047483	1.03256	1.29606	0.896249	0.727318	0.952301	0.58428	1.07887	1.4582	1.0272		0.858784	0.114369
0.486525	0.829735	-0.0522552	1.0419	1.31559	0.898872	0.733681	0.964189	0.5859	1.09703	1.47351	1.02941		0.867007	0.116039
0.492962	0.839707	-0.0569583	1.05131	1.33482	0.90137	0.740006	0.976086	0.58765	1.11514	1.48818	1.03139		0.875139	0.117683
0.499622	0.850053	-0.0612365	1.06078	1.35349	0.903734	0.746255	0.98826	0.589447	1.13277	1.50234	1.0328		0.883192	0.119259
0.50637	0.860411	-0.0648585	1.0703	1.37148	0.906131	0.752567	1.00031	0.591024	1.1498	1.51608	1.0345		0.891177	0.120767
0.512932	0.870707	-0.0677219	1.07986	1.38879	0.908446	0.758894	1.01219	0.592485	1.1668	1.52955	1.03682		0.899146	0.122221
0.519294	0.880916	-0.0699234	1.08931	1.40537	0.910541	0.765297	1.02407	0.594038	1.1837	1.54303	1.0393		0.907078	0.123624
0.525542	0.891378	-0.0716091	1.09839	1.42151	0.912511	0.771676	1.03549	0.595681	1.20058	1.5566	1.0421		0.914988	0.124991
0.531722	0.902276	-0.0730884	1.10729	1.43735	0.914519	0.777791	1.04642	0.597352	1.21817	1.57012	1.04488		0.9229	0.126354
0.537832	0.913345	-0.0745959	1.11627	1.45292	0.916619	0.783486	1.05719	0.599213	1.2365	1.58329	1.04738		0.930787	0.127718
0.543715	0.924356	-0.0758774	1.12525	1.46817	0.918779	0.788885	1.06788	0.60125	1.25499	1.5961	1.04999		0.938623	0.129062
0.549438	0.934945	-0.0769278	1.13406	1.4831	0.921012	0.794287	1.07848	0.603425	1.27355	1.60895	1.05271		0.946419	0.130394
0.555304	0.9456	-0.077828	1.14274	1.49787	0.92285	0.799759	1.08908	0.605826	1.29219	1.62197	1.05547		0.954235	0.131719
0.5613	0.95645	-0.0785621	1.15127	1.51252	0.924343	0.805344	1.09945	0.608483	1.31082	1.63516	1.05839		0.96208	0.133035
0.567343	0.967257	-0.0794844	1.15966	1.52734	0.925763	0.810997	1.10921	0.611308	1.32991	1.6486	1.06113		0.969919	0.134383
0.57336	0.978491	-0.0807968	1.16786	1.54257	0.926926	0.816586	1.11886	0.614394	1.34946	1.66192	1.06319		0.977736	0.135771
0.579132	0.990046	-0.0824804	1.17577	1.55804	0.928134	0.822183	1.12862	0.617805	1.36908	1.67517	1.06499		0.985541	0.137193
0.584663	1.0018	-0.0846028	1.18352	1.57362	0.929353	0.827893	1.13819	0.621316	1.38869	1.68833	1.06709		0.993321	0.13865
0.590087	1.01372	-0.0870196	1.19107	1.58911	0.930433	0.833629	1.14786	0.625066	1.40828	1.70087	1.06945		1.00105	0.140104
0.595374	1.02571	-0.0894315	1.19822	1.6044	0.931425	0.839585	1.15762	0.629047	1.42784	1.71319	1.07198		1.00875	0.141546
0.600529	1.03779	-0.0918334	1.20511	1.61939	0.932321	0.845862	1.16701	0.633023	1.44695	1.72552	1.07486		1.01638	0.142973
0.605651	1.04973	-0.094439	1.21186	1.63379	0.933124	0.852026	1.17617	0.637018	1.46553	1.73757	1.07802		1.02384	0.144377
0.610779	1.06157	-0.0971413	1.21841	1.64764	0.933787	0.858027	1.18534	0.641084	1.48397	1.7491	1.08115		1.03114	0.145753
0.615805	1.07311	-0.0997318	1.22473	1.66121	0.934782	0.863972	1.1945	0.64521	1.50223	1.75991	1.08438		1.03834	0.147085
0.620635	1.08424	-0.10232	1.23107	1.67467	0.9362	0.869977	1.20388	0.649284	1.52018	1.77028	1.08767		1.04548	0.148401
0.625365	1.09537	-0.105008	1.23753	1.68797	0.937682	0.876154	1.21366	0.653428	1.53775	1.78044	1.09116		1.05262	0.14971
0.630103	1.10624	-0.107814	1.24399	1.70079	0.939227	0.882312	1.22363	0.65771	1.555	1.79059	1.09509		1.05974	0.151006
0.634921	1.11678	-0.11065	1.25048	1.71301	0.940784	0.888371	1.23345	0.661993	1.57182	1.80066	1.0989		1.06671	0.152274
0.639645	1.12706	-0.11341	1.25715	1.72468	0.942376	0.894412	1.24331	0.666427	1.58811	1.81048	1.10259		1.07357	0.153501
0.644088	1.13697	-0.116158	1.26403	1.73604	0.943961	0.900632	1.25337	0.671031	1.60417	1.82026	1.10637		1.0804	0.154717
0.64846	1.14677	-0.118685	1.27106	1.74736	0.945394	0.906644	1.26347	0.67579	1.62007	1.82972	1.10999		1.08717	0.15591
0.652795	1.15606	-0.120902	1.27813	1.75844	0.946807	0.912383	1.27363	0.680874	1.63619	1.8388	1.11328		1.09387	0.157069
0.657104	1.16476	-0.122895	1.28505	1.76945	0.948293	0.918317	1.28338	0.686118	1.65271	1.8478	1.11626		1.10053	0.158213
0.661339	1.1733	-0.12467	1.2919	1.78055	0.949792	0.924227	1.29267	0.691439	1.66932	1.8568	1.11913		1.10715	0.159348
0.665271	1.18164	-0.126446	1.29903	1.79154	0.951184	0.930158	1.30215	0.696952	1.68598	1.86601	1.12183		1.11378	0.160499
0.669129	1.18999	-0.128118	1.30613	1.80249	0.952409	0.935975	1.31177	0.702598	1.70266	1.87498	1.12435		1.12036	0.161641
0.673106	1.1981	-0.12946	1.31291	1.81332	0.953669	0.941563	1.32121	0.70832	1.71934	1.88316	1.12681		1.12684	0.162729
0.677256	1.20582	-0.130633	1.31954	1.82416	0.954921	0.94726	1.3303	0.714142	1.73599	1.89059	1.12908		1.1332	0.163772
0.681615	1.21342	-0.131715	1.32614	1.8354	0.95598	0.952995	1.3392	0.720153	1.75272	1.89744	1.1313		1.13955	0.1648
0.686025	1.22084	-0.132699	1.33253	1.84704	0.956922	0.958757	1.34798	0.726172	1.76968	1.90387	1.13343		1.14588	0.165828
0.690376	1.22804	-0.133675	1.3388	1.85846	0.957813	0.96449	1.35645	0.732129	1.78666	1.90981	1.13538		1.15206	0.166836
0.694734	1.235	-0.134777	1.34517	1.86939	0.958704	0.970424	1.36484	0.738085	1.80349	1.91533	1.13733		1.15814	0.16782
0.699249	1.24197	-0.135895	1.35139	1.88051	0.959539	0.976744	1.37351	0.743911	1.81979	1.92054	1.13906		1.16419	0.168788
0.70369	1.24913	-0.136849	1.35747	1.89186	0.960351	0.983247	1.38251	0.74987	1.83558	1.92533	1.14053		1.17023	0.16973
0.708009	1.25606	-0.137718	1.36347	1.90304	0.961225	0.989802	1.39164	0.756031	1.85123	1.92982	1.14217		1.17623	0.17065
0.712368	1.26263	-0.138605	1.36914	1.91398	0.96206	0.996152	1.40051	0.762169	1.86678	1.93404	1.14377		1.18208	0.171551
0.716446	1.26882	-0.139582	1.37456	1.9247	0.962909	1.00254	1.409	0.768347	1.88228	1.93809	1.14519		1.18778	0.172447
0.720179	1.27454	-0.140643	1.37979	1.93534	0.963731	1.00885	1.41757	0.774526	1.89766	1.94227	1.14662		1.19337	0.173356
0.72368	1.28007	-0.141668	1.3849	1.94605	0.96445	1.01476	1.42645	0.780612	1.91279	1.94668	1.1478		1.19888	0.174283
0.726933	1.28524	-0.142686	1.38985	1.9566	0.96527	1.02043	1.43548	0.78652	1.92781	1.9513	1.14872		1.20429	0.17522
0.730166	1.29002	-0.143661	1.39452	1.96688	0.966109	1.02566	1.4447	0.792263	1.94279	1.95593	1.14946		1.20957	0.176155
0.733495	1.29434	-0.144455	1.39906	1.97729	0.96681	1.03067	1.45407	0.79784	1.95781	1.9606	1.1498		1.21478	0.177096
0.73674	1.29806	-0.145166	1.40337	1.98802	0.967625	1.03571	1.46305	0.803295	1.97315	1.96525	1.14965		1.2199	0.178052
0.739932	1.30137	-0.14595	1.40755	1.99878	0.968502	1.04073	1.47165	0.808896	1.98907	1.9699	1.14945		1.22499	0.179029
0.743246	1.30416	-0.146788	1.41185	2.00947	0.969071	1.04567	1.48025	0.814401	2.00527	1.97467	1.14935		1.23005	0.180027
0.746623	1.30678	-0.147477	1.41603	2.02031	0.969307	1.05047	1.48883	0.819518	2.02141	1.97936	1.14919		1.23503	0.181031
0.750194	1.30963	-0.147867	1.42	2.03142	0.969382	1.05534	1.49749	0.824465	2.03734	1.98406	1.14911		1.24005	0.182026
0.754159	1.3125	-0.147997	1.42389	2.04276	0.969275	1.06012	1.50615	0.829382	2.05299	1.98875	1.14927		1.24511	0.183003
0.75836	1.31535	-0.147944	1.428	2.05411	0.968924	1.0649	1.51444	0.834305	2.06857	1.99338	1.14992		1.25019	0.183963
0.762622	1.31796	-0.147778	1.43223	2.06515	0.968463	1.07007	1.52248	0.839189	2.08403	1.99795	1.15126		1.2553	0.184898
0.766947	1.32041	-0.147511	1.43626	2.07597	0.967752	1.07558	1.53027	0.844023	2.09922	2.0023	1.15314		1.26036	0.185802
0.771441	1.32288	-0.147177	1.44027	2.08661	0.966817	1.08129	1.53766	0.848951	2.11422	2.00654	1.1553		1.2654	0.18668
0.776021	1.32523	-0.146787	1.44419	2.09707	0.966026	1.08706	1.54501	0.853977	2.12881	2.0104	1.15812		1.27043	0.187519
0.780515	1.32745	-0.146344	1.44798	2.1074	0.965124	1.09258	1.55251	0.858991	2.14276	2.01383	1.16186		1.27539	0.188321
0.78497	1.32954	-0.145765	1.45179	2.11749	0.963978	1.09779	1.55996	0.863891	2.15633	2.01717	1.16566		1.28023	0.189102
0.789443	1.33158	-0.145034	1.45535	2.12729	0.962935	1.10298	1.5675	0.868691	2.1696	2.0203	1.1692		1.28499	0.189852
0.793919	1.33333	-0.144461	1.45866	2.13684	0.961985	1.10815	1.57478	0.873579	2.18231	2.0234	1.17269		1.2896	0.190578
0.798411	1.33456	-0.144089	1.4619	2.14606	0.960974	1.11312	1.5816	0.87856	2.19464	2.02637	1.17589		1.294	0.191286
0.802835	1.33543	-0.143849	1.46499	2.15473	0.959933	1.11822	1.5886	0.883508	2.20664	2.02917	1.17872		1.29824	0.191974
0.807224	1.33598	-0.143691	1.46799	2.1631	0.958945	1.12363	1.59573	0.888373	2.21837	2.03199	1.18115		1.3024	0.192651
0.81186	1.33634	-0.143424	1.47086	2.17141	0.957986	1.12899	1.60278	0.893141	2.22985	2.03466	1.18323		1.30647	0.193307
0.816718	1.33651	-0.143102	1.47376	2.17963	0.957183	1.13441	1.60987	0.897938	2.24095	2.0372	1.1851		1.31051	0.193937
0.82162	1.33645	-0.142767	1.47684	2.18798	0.956589	1.14009	1.61693	0.902602	2.25163	2.03964	1.18688		1.31454	0.194553
0.826609	1.33641	-0.142476	1.48005	2.19646	0.955864	1.14581	1.62381	0.906887	2.26187	2.04211	1.18822		1.31847	0.195172
0.831561	1.33649	-0.142181	1.48336	2.20479	0.954989	1.15175	1.63071	0.910871	2.27198	2.04475	1.18895		1.32233	0.195798
0.836413	1.33664	-0.141943	1.48643	2.21293	0.95407	1.15766	1.63765	0.914598	2.28188	2.04715	1.18981		1.32611	0.196415
0.841349	1.33676	-0.141965	1.48969	2.22126	0.953006	1.16353	1.64437	0.918191	2.29178	2.04934	1.19096		1.32986	0.19705
0.846438	1.33696	-0.141931	1.4934	2.22974	0.95184	1.16969	1.65122	0.921619	2.3015	2.05136	1.19231		1.33368	0.197682
0.851671	1.33719	-0.141742	1.49737	2.23825	0.950588	1.17586	1.65831	0.924718	2.31085	2.05316	1.194		1.33752	0.198296
0.856891	1.33748	-0.141446	1.50177	2.24697	0.949264	1.18193	1.66502	0.927494	2.32036	2.05498	1.19581		1.34138	0.198925
0.861911	1.33791	-0.140975	1.50616	2.25567	0.94794	1.18775	1.67101	0.929998	2.32955	2.05675	1.19764		1.34511	0.199533
0.866877	1.33831	-0.140415	1.51076	2.26453	0.946642	1.19342	1.67657	0.932376	2.33892	2.05848	1.19957		1.34884	0.200149
0.871721	1.33869	-0.139779	1.51551	2.27329	0.945252	1.19873	1.68184	0.934621	2.34852	2.06019	1.20138		1.3525	0.200774
0.876442	1.33899	-0.139092	1.52019	2.28171	0.943606	1.20386	1.68707	0.937026	2.35834	2.06188	1.20297		1.35608	0.2014
0.881106	1.33913	-0.13835	1.52495	2.2897	0.941924	1.20914	1.69223	0.939634	2.36837	2.06368	1.2046		1.35968	0.202019
0.885932	1.3391	-0.13755	1.52973	2.29717	0.940413	1.21435	1.69721	0.942234	2.37808	2.06567	1.2063		1.36322	0.202604
0.891163	1.33873	-0.136573	1.53498	2.30486	0.939084	1.22	1.70227	0.944997	2.38817	2.06802	1.20791		1.36697	0.203203
0.896048	1.33816	-0.135413	1.53992	2.31207	0.937987	1.22533	1.70683	0.947578	2.39761	2.07038	1.20937		1.37049	0.203754
0.901006	1.33726	-0.134098	1.54503	2.31941	0.936946	1.23089	1.71156	0.950296	2.40783	2.07296	1.2106		1.37414	0.204338
0.905605	1.33627	-0.132768	1.5501	2.32637	0.936107	1.2364	1.71586	0.952952	2.41811	2.07561	1.21166		1.37769	0.204914
0.910042	1.33516	-0.131433	1.55478	2.33282	0.935434	1.24157	1.71998	0.955587	2.42786	2.07817	1.2128		1.38106	0.205449
0.915595	1.33348	-0.129995	1.56031	2.34028	0.934547	1.24802	1.72583	0.958984	2.4398	2.08121	1.21389		1.38516	0.206108
0.919032	1.33237	-0.129175	1.56375	2.34477	0.933965	1.25213	1.72967	0.961123	2.44727	2.08311	1.21442		1.3877	0.206524

## Sheet: noise minus 10 y
fly1	fly2	fly3	fly4	fly5	fly6	fly7	fly8	fly9	fly10	fly11	fly12		Avg	SEM
2.85851e-07	2.66501e-07	4.40142e-07	-1.4623e-06	-8.06656e-05	-3.27275e-08	-1.99152e-07	1.11408e-06	4.4118e-09	7.95103e-08	-5.50171e-07	-0.000184311		-2.20858e-05	1.61967e-05
-7.60723e-07	-1.72821e-07	-3.31982e-07	1.31712e-06	-0.000118428	1.29334e-07	2.3192e-07	-1.20113e-06	8.12897e-08	-2.01481e-07	7.49154e-07	-0.00020089		-2.66231e-05	1.86436e-05
9.36197e-07	-2.32387e-08	-2.51838e-07	-5.71486e-07	-0.000192342	-2.22794e-07	-1.93016e-07	8.90594e-07	-6.10505e-08	3.04547e-07	-7.41429e-07	-0.000190891		-3.19305e-05	2.15327e-05
-2.27302e-06	2.95812e-07	2.28274e-08	-9.07727e-07	-0.000277498	2.79182e-07	9.45301e-08	-1.11108e-07	8.45507e-08	-3.45414e-07	5.4424e-07	-0.000206246		-4.05051e-05	2.7505e-05
-1.22188e-06	-5.57749e-07	-1.43102e-06	1.43228e-06	-0.000371258	-2.65928e-07	1.01586e-07	-6.33992e-07	-7.25638e-07	2.83633e-07	-9.98454e-08	-0.000163211		-4.47989e-05	3.26127e-05
-5.06069e-06	7.26509e-07	4.43642e-07	-6.02485e-06	-0.000399866	1.72133e-07	-2.75959e-07	1.16776e-06	-2.50636e-07	-9.27348e-08	-2.45379e-07	-7.80751e-05		-4.06151e-05	3.32868e-05
-7.54847e-06	-6.90959e-07	-4.08483e-06	2.07474e-06	-0.000374341	4.28134e-08	6.14126e-07	-3.2761e-06	-1.66018e-06	-1.71836e-07	1.124e-06	2.95198e-05		-2.98665e-05	3.14296e-05
-6.95821e-06	5.82656e-07	1.14024e-06	-1.39231e-05	-0.000352243	-2.91053e-07	-8.75523e-07	1.62103e-06	-6.42397e-07	4.93384e-07	-3.22907e-06	0.000178248		-1.63398e-05	3.40345e-05
5.40225e-05	-4.09227e-07	4.76622e-05	-9.50358e-07	-0.000322236	7.12047e-07	-1.9466e-07	-7.13719e-06	-4.35745e-06	-7.41151e-07	2.18458e-07	0.000383212		1.24835e-05	4.38731e-05
0.000256031	-8.18871e-07	0.000127863	6.5257e-05	-0.000344632	-9.37851e-07	-2.91346e-06	-2.75537e-06	4.8014e-06	1.13164e-06	-9.09056e-06	0.000725535		6.82893e-05	7.15359e-05
0.000608624	1.23895e-07	0.000186899	0.000207508	-0.000368367	6.49841e-07	-4.15806e-06	-1.57824e-05	9.50043e-05	-1.45287e-06	-6.4247e-06	0.00112502		0.000152304	0.000109432
0.00127637	-3.93801e-06	0.000281664	0.000545634	-0.000367693	-2.13864e-06	-6.41818e-06	4.56905e-05	0.000219755	-4.9713e-07	-1.83925e-05	0.00162492		0.00029958	0.000168674
0.00217384	5.80714e-07	0.00055969	0.00107616	-0.000356483	-3.80458e-06	-1.22603e-05	0.00027575	0.000323014	-2.44873e-06	-1.25527e-05	0.00222514		0.000520552	0.000249307
0.00321916	-9.97481e-06	0.00100468	0.00197437	-0.000293392	-5.16428e-06	3.69015e-05	0.00047393	0.000488078	-4.83871e-06	0.000239412	0.00277481		0.000824831	0.000341717
0.00474009	3.03626e-05	0.00164294	0.00337466	-0.000151693	-1.46131e-05	0.000216031	0.000938525	0.00075933	-2.49826e-06	0.00075984	0.00352426		0.0013181	0.000478581
0.00673987	0.000142405	0.00260231	0.00531359	1.46791e-05	2.25754e-06	0.000618061	0.00191169	0.00115162	-1.58057e-05	0.00157951	0.00451701		0.0020481	0.000665021
0.00930185	0.000272689	0.00396392	0.0078706	0.000166882	9.14644e-05	0.00125569	0.00327805	0.00166979	6.02718e-05	0.00287597	0.00578547		0.00304939	0.000911068
0.0125641	0.000523383	0.00576531	0.0111666	0.000523819	0.00036325	0.00209708	0.00528893	0.00236275	0.000306838	0.00465222	0.00747738		0.00442431	0.0012222
0.0163709	0.000868652	0.00796316	0.0153785	0.00124359	0.000957204	0.00318642	0.00795555	0.00332289	0.000687996	0.00683021	0.00961896		0.00619867	0.00159114
0.0209171	0.00128381	0.0105974	0.0205591	0.00236077	0.00193949	0.00459364	0.0112769	0.00448056	0.00115128	0.0094242	0.0121429		0.00839393	0.00202994
0.0264752	0.00189116	0.0137716	0.0269371	0.0039248	0.0031791	0.00650202	0.0154528	0.00584401	0.00173411	0.0125398	0.0151374		0.0111158	0.00256311
0.0329709	0.00272452	0.0175309	0.0344643	0.00587396	0.00459208	0.00899822	0.0205706	0.00751865	0.00265334	0.0163532	0.0188879		0.0144282	0.00318496
0.0403447	0.0038354	0.0218413	0.0430546	0.00828439	0.00633827	0.0119622	0.0266139	0.00957151	0.00405422	0.0210971	0.0230349		0.018336	0.00387549
0.0488359	0.00539151	0.026654	0.0529074	0.011235	0.00850236	0.0153434	0.0335743	0.0121468	0.00596967	0.0267274	0.0279515		0.0229366	0.00464708
0.058423	0.00761912	0.0319614	0.0638896	0.0146768	0.0111812	0.0191858	0.0416423	0.0153837	0.00850141	0.0330687	0.0339256		0.0282882	0.00548279
0.0689143	0.0105272	0.0376267	0.0759837	0.0186182	0.0144581	0.0234985	0.0505846	0.0193898	0.0118536	0.0402067	0.0404038		0.0343388	0.00635542
0.0804147	0.0140526	0.0435877	0.0892083	0.0231224	0.0183049	0.0282036	0.0603907	0.0241184	0.0160462	0.0481292	0.0476682		0.0411039	0.00727578
0.092874	0.0182967	0.0499444	0.103542	0.0282973	0.0226308	0.0331686	0.0713859	0.0295544	0.0211085	0.0567211	0.0556773		0.0486001	0.00824686
0.106342	0.0233965	0.0566854	0.118979	0.0339821	0.0272737	0.0383569	0.0833133	0.0358552	0.027221	0.0660696	0.0642728		0.0568123	0.00926356
0.121092	0.0294973	0.0638337	0.135419	0.0400234	0.0320975	0.0439021	0.0963105	0.0430644	0.0343	0.0762885	0.0735207		0.0657791	0.0103408
0.136975	0.036631	0.0714766	0.152749	0.0464717	0.0371278	0.0497185	0.110545	0.0512882	0.0426202	0.0872202	0.0832739		0.0755081	0.0114636
0.153676	0.0447119	0.0795894	0.170867	0.0533096	0.0425871	0.055498	0.125734	0.0604704	0.0523751	0.0986673	0.0931724		0.0858882	0.0126086
0.171277	0.0536317	0.0881671	0.189909	0.0606102	0.0485014	0.0610683	0.141861	0.0702955	0.0633564	0.110741	0.103234		0.0968877	0.0138061
0.189778	0.0634949	0.0972412	0.209713	0.0683534	0.0548364	0.0665004	0.15893	0.0809257	0.07577	0.123633	0.114127		0.108609	0.0150488
0.209189	0.0743388	0.106784	0.230083	0.0765458	0.0615265	0.0719055	0.177022	0.0925946	0.0896768	0.137529	0.125271		0.121039	0.0163293
0.229755	0.0859504	0.116728	0.251217	0.0852983	0.0683933	0.077167	0.196257	0.105118	0.10501	0.15255	0.136418		0.134155	0.0176932
0.251344	0.0982362	0.127212	0.273195	0.0947036	0.0754064	0.0821415	0.216623	0.118357	0.121802	0.168593	0.148196		0.147984	0.0191502
0.273839	0.110861	0.138381	0.295796	0.104785	0.0823933	0.0868957	0.237923	0.132018	0.140128	0.185692	0.160386		0.162425	0.0206957
0.297164	0.123513	0.150133	0.318857	0.115424	0.0894611	0.0915709	0.26	0.145806	0.15984	0.203906	0.17284		0.177376	0.0223258
0.321108	0.136243	0.162565	0.342667	0.126722	0.0968806	0.0960622	0.28306	0.159694	0.180874	0.223197	0.185643		0.192893	0.0240456
0.34561	0.149346	0.175681	0.367367	0.138626	0.104577	0.100275	0.307124	0.173705	0.203381	0.243598	0.198709		0.209	0.0258635
0.370471	0.163124	0.189402	0.392705	0.150942	0.112507	0.1044	0.33214	0.188089	0.226658	0.265259	0.212098		0.22565	0.0277561
0.395401	0.177445	0.203759	0.418399	0.163791	0.120745	0.108641	0.358095	0.203104	0.250594	0.287897	0.22637		0.242853	0.0296813
0.4203	0.192386	0.21869	0.444393	0.177328	0.129345	0.11319	0.384674	0.219024	0.27567	0.310768	0.241633		0.260617	0.0316003
0.445245	0.207814	0.234269	0.470916	0.191607	0.138116	0.118149	0.411702	0.235798	0.301852	0.333942	0.257416		0.278902	0.0335273
0.470031	0.2235	0.25042	0.498233	0.206563	0.147059	0.123559	0.439112	0.252688	0.329296	0.357465	0.273576		0.297625	0.0354786
0.494414	0.239619	0.267144	0.526435	0.22204	0.156335	0.129466	0.466925	0.26934	0.357915	0.381369	0.290329		0.316778	0.0374458
0.518465	0.256096	0.284521	0.555355	0.237844	0.165939	0.135915	0.495587	0.285816	0.387504	0.405745	0.307627		0.336368	0.0394413
0.542061	0.273561	0.30243	0.585146	0.254107	0.17608	0.14301	0.525384	0.302551	0.418085	0.430002	0.324898		0.356443	0.0414468
0.565291	0.292231	0.320778	0.615939	0.271056	0.186722	0.150946	0.556269	0.320215	0.449872	0.454481	0.342471		0.377189	0.0434576
0.588165	0.311475	0.339571	0.647294	0.288636	0.197717	0.159946	0.588142	0.338827	0.482705	0.479504	0.360337		0.398527	0.0454642
0.610372	0.331139	0.358961	0.678737	0.306963	0.209186	0.170024	0.620869	0.35834	0.516529	0.504908	0.377966		0.420333	0.0474309
0.632021	0.35116	0.378811	0.710653	0.325924	0.221064	0.181193	0.654438	0.378676	0.551954	0.530988	0.395436		0.442693	0.0494013
0.65344	0.371807	0.399143	0.743347	0.345276	0.233207	0.193399	0.688831	0.399621	0.589043	0.558174	0.411869		0.465596	0.0514266
0.67495	0.392658	0.420115	0.776284	0.365127	0.245579	0.206525	0.724353	0.42101	0.627373	0.586882	0.426913		0.488981	0.0535217
0.696674	0.413212	0.441537	0.809958	0.3855	0.258266	0.220629	0.761165	0.44276	0.666351	0.616649	0.441029		0.512811	0.0557028
0.71865	0.433792	0.463463	0.84467	0.406223	0.271318	0.23579	0.7994	0.465452	0.70593	0.647197	0.45456		0.537204	0.0579697
0.741	0.454792	0.485976	0.880001	0.427224	0.284631	0.252055	0.838793	0.489268	0.746357	0.678489	0.468077		0.562222	0.0602951
0.76383	0.476632	0.508815	0.91618	0.448784	0.298152	0.26948	0.87776	0.514123	0.787647	0.710586	0.481661		0.587804	0.0626288
0.786936	0.498777	0.531826	0.953291	0.470908	0.311804	0.287953	0.916237	0.540073	0.83005	0.743769	0.495357		0.613915	0.0649921
0.810037	0.521232	0.555332	0.991184	0.493478	0.325481	0.307082	0.955305	0.566546	0.87349	0.77711	0.508849		0.640427	0.0674239
0.833692	0.544663	0.579187	1.02929	0.516502	0.339244	0.32685	0.995009	0.593292	0.917928	0.810366	0.522433		0.667371	0.0698987
0.858199	0.568964	0.602712	1.06787	0.539713	0.353168	0.347464	1.03527	0.620211	0.963369	0.843832	0.536801		0.694797	0.0724247
0.883278	0.594078	0.626027	1.10744	0.563076	0.367205	0.368818	1.07611	0.64712	1.00957	0.877205	0.551542		0.722622	0.0750182
0.908831	0.619916	0.649732	1.14798	0.586563	0.381414	0.390971	1.11768	0.674316	1.05639	0.910448	0.567004		0.750937	0.0776587
0.934426	0.64701	0.673926	1.18999	0.610004	0.39585	0.413994	1.1598	0.70188	1.10404	0.942923	0.583045		0.77974	0.0803398
0.960067	0.675824	0.698293	1.23283	0.632931	0.410469	0.437865	1.2026	0.729595	1.15273	0.97463	0.599274		0.808925	0.0830664
0.98612	0.70598	0.723016	1.27599	0.655333	0.425293	0.462513	1.246	0.757502	1.20225	1.00625	0.616498		0.838562	0.085816
1.01248	0.737219	0.748444	1.31967	0.677974	0.440325	0.487909	1.28917	0.785733	1.25255	1.0378	0.634357		0.868636	0.0885579
1.03909	0.769343	0.774517	1.36368	0.700962	0.455624	0.514046	1.33237	0.814304	1.30348	1.06929	0.652342		0.899087	0.0912987
1.0658	0.802638	0.80129	1.40815	0.724171	0.471304	0.541044	1.37571	0.84323	1.3545	1.10086	0.670183		0.929907	0.0940261
1.09236	0.837085	0.828683	1.45312	0.747521	0.487348	0.569069	1.41837	0.872485	1.40547	1.13304	0.687719		0.961023	0.0967145
1.11887	0.87208	0.856825	1.49922	0.771105	0.503611	0.59771	1.46067	0.902117	1.45656	1.16578	0.705399		0.992495	0.0994179
1.14566	0.907616	0.886192	1.54658	0.79527	0.520066	0.626974	1.50336	0.932169	1.50794	1.1984	0.723614		1.02449	0.10215
1.17293	0.943432	0.91638	1.59449	0.820165	0.536771	0.657126	1.54613	0.962628	1.55978	1.23093	0.742734		1.05696	0.104866
1.20065	0.979351	0.94662	1.64292	0.845968	0.553568	0.68793	1.58878	0.993159	1.61194	1.26356	0.762044		1.08971	0.10759
1.22895	1.01564	0.977064	1.69174	0.872727	0.570506	0.719081	1.63168	1.02344	1.66421	1.29642	0.781759		1.12277	0.110325
1.25747	1.05223	1.00831	1.74083	0.900699	0.587606	0.750332	1.67464	1.0538	1.71682	1.3294	0.802655		1.15623	0.113036
1.28543	1.08893	1.04027	1.79016	0.929691	0.604674	0.78201	1.71774	1.08421	1.76976	1.36225	0.823818		1.18991	0.115743
1.31262	1.12552	1.07264	1.83967	0.95892	0.621623	0.814379	1.76214	1.11441	1.82288	1.39514	0.844824		1.22373	0.118505
1.33918	1.16245	1.10568	1.88917	0.988185	0.638298	0.847443	1.80845	1.14431	1.8763	1.42805	0.86622		1.25781	0.121334
1.36574	1.19991	1.13932	1.9383	1.01772	0.654915	0.881034	1.8559	1.17399	1.93012	1.46086	0.888998		1.29223	0.124163
1.39253	1.2378	1.17348	1.98725	1.04773	0.671662	0.914755	1.90409	1.20375	1.98449	1.49358	0.913221		1.32703	0.126988
1.4186	1.27634	1.20814	2.03601	1.07793	0.688452	0.948786	1.95273	1.23342	2.03928	1.52615	0.938325		1.36201	0.129809
1.4432	1.31552	1.24314	2.08437	1.10823	0.705348	0.982963	2.00121	1.26236	2.0943	1.55836	0.963887		1.39691	0.132607
1.46642	1.35589	1.27894	2.13231	1.13886	0.722228	1.01725	2.04955	1.29026	2.14959	1.59028	0.989545		1.43176	0.135394
1.48889	1.39692	1.31572	2.17978	1.16968	0.739039	1.05215	2.09732	1.31782	2.2051	1.62246	1.01636		1.46677	0.138125
1.511	1.43791	1.35323	2.22702	1.20065	0.755906	1.08792	2.14459	1.34584	2.26088	1.65531	1.04472		1.50208	0.140796
1.53315	1.47935	1.39129	2.27412	1.23193	0.772903	1.1247	2.19219	1.3739	2.31676	1.6889	1.07305		1.53769	0.14347
1.55595	1.52125	1.42961	2.32108	1.26373	0.789747	1.16205	2.23998	1.40181	2.37275	1.72269	1.10064		1.57344	0.146175
1.57954	1.56367	1.46824	2.3679	1.29621	0.806371	1.19959	2.28744	1.43006	2.42884	1.75611	1.12855		1.60938	0.148866
1.60389	1.60608	1.50726	2.41482	1.32931	0.823243	1.23744	2.33476	1.45866	2.48508	1.78975	1.15662		1.64558	0.151546
1.62892	1.64819	1.54655	2.46202	1.36288	0.840343	1.2756	2.3824	1.48745	2.54166	1.82382	1.18439		1.68202	0.154265
1.65437	1.69054	1.5853	2.50916	1.39666	0.857643	1.31427	2.4306	1.51635	2.59805	1.8576	1.21242		1.71858	0.156981
1.68032	1.73336	1.62324	2.55634	1.43077	0.875211	1.35368	2.47891	1.54548	2.65423	1.8911	1.23983		1.75521	0.159694
1.70727	1.77649	1.6608	2.60354	1.46545	0.892857	1.39379	2.52655	1.57554	2.71055	1.92525	1.26642		1.79204	0.162393
1.73531	1.81952	1.69788	2.65058	1.50055	0.910777	1.43434	2.57435	1.60663	2.7667	1.96013	1.2926		1.82911	0.165076
1.76372	1.863	1.73461	2.69769	1.536	0.929067	1.47516	2.6231	1.63797	2.82268	1.99521	1.31767		1.86632	0.167801
1.79184	1.90652	1.77108	2.74421	1.57168	0.947455	1.51626	2.672	1.66921	2.87875	2.03065	1.34122		1.90341	0.170556
1.8196	1.94974	1.80768	2.78994	1.6076	0.965989	1.55726	2.72055	1.7005	2.93476	2.06621	1.36444		1.94036	0.173282
1.84685	1.99363	1.84483	2.8354	1.64386	0.985061	1.5982	2.76891	1.73183	2.99059	2.10193	1.38824		1.97744	0.175956
1.87351	2.03829	1.88231	2.88044	1.6803	1.0048	1.6395	2.81756	1.76316	3.04641	2.13803	1.41158		2.01466	0.178615
1.89966	2.08387	1.91991	2.925	1.71639	1.0249	1.68105	2.86605	1.79448	3.10215	2.1734	1.43471		2.0518	0.181253
1.92548	2.13017	1.95799	2.96918	1.75173	1.04505	1.72307	2.91382	1.82571	3.15782	2.20797	1.45784		2.08882	0.183863
1.95139	2.17666	1.99698	3.01316	1.78692	1.06516	1.7659	2.96128	1.85697	3.21379	2.24264	1.48031		2.12593	0.186488
1.97744	2.22278	2.03622	3.05679	1.82233	1.08524	1.80924	3.00892	1.88822	3.26994	2.27765	1.50253		2.16311	0.189127
2.00355	2.26845	2.0758	3.09999	1.85767	1.10548	1.85296	3.05734	1.91937	3.32601	2.31331	1.52534		2.20044	0.191761
2.02988	2.31462	2.11647	3.14297	1.89274	1.12591	1.89716	3.10593	1.9506	3.38232	2.34866	1.55		2.2381	0.194352
2.05672	2.36145	2.15805	3.18558	1.92766	1.14635	1.94132	3.15417	1.98188	3.43889	2.38265	1.57626		2.27591	0.196891
2.08427	2.40938	2.19991	3.22806	1.96283	1.16699	1.98499	3.20264	2.01325	3.49546	2.41511	1.60375		2.31389	0.199398
2.11188	2.45843	2.2416	3.27027	1.99828	1.18795	2.02841	3.25037	2.04487	3.55232	2.44607	1.6327		2.35193	0.201841
2.13954	2.5075	2.28312	3.3119	2.03372	1.20912	2.07202	3.29651	2.07673	3.6088	2.47651	1.66245		2.38983	0.204171
2.16774	2.55642	2.32431	3.35328	2.06918	1.23049	2.11591	3.34208	2.10868	3.66436	2.50722	1.69303		2.42773	0.20641
2.19636	2.60537	2.36515	3.39432	2.10537	1.2521	2.15993	3.38795	2.14077	3.71988	2.53886	1.72447		2.46588	0.208612
2.22518	2.65404	2.40586	3.43492	2.1425	1.27398	2.20408	3.43391	2.1731	3.77529	2.57155	1.75692		2.50428	0.210755
2.25363	2.70238	2.44695	3.47496	2.18018	1.29614	2.24828	3.47949	2.20549	3.83056	2.60489	1.79092		2.54282	0.212814
2.28201	2.75125	2.4892	3.51438	2.21818	1.31871	2.29259	3.52497	2.23793	3.88593	2.63881	1.82595		2.58166	0.214816
2.31064	2.80066	2.53209	3.55345	2.25644	1.34154	2.33667	3.57034	2.27048	3.94109	2.67211	1.86099		2.62054	0.216789
2.33918	2.84903	2.57478	3.59215	2.29523	1.36458	2.38031	3.61564	2.30302	3.9962	2.7053	1.89481		2.65919	0.218776
2.36752	2.8959	2.61743	3.63059	2.3344	1.38818	2.42414	3.66116	2.33562	4.05079	2.73997	1.92763		2.69778	0.220737
2.3957	2.9416	2.66011	3.66914	2.37371	1.41182	2.46866	3.70648	2.36833	4.10397	2.77628	1.96089		2.73639	0.222614
2.4243	2.98625	2.70225	3.70792	2.41319	1.43505	2.51394	3.75245	2.40103	4.15614	2.81436	1.99417		2.77509	0.224483
2.45351	3.03093	2.74371	3.74664	2.45305	1.45837	2.55938	3.79969	2.43357	4.20829	2.85328	2.02656		2.81392	0.226411
2.48291	3.07563	2.78505	3.78498	2.49341	1.48175	2.60442	3.84645	2.46589	4.26058	2.89177	2.0583		2.85259	0.228339
2.51219	3.11953	2.82664	3.82287	2.534	1.50476	2.64921	3.89161	2.49793	4.31275	2.9291	2.08957		2.89085	0.230229
2.5414	3.16345	2.86826	3.86024	2.57482	1.52762	2.69389	3.93607	2.5297	4.36473	2.96524	2.12005		2.92879	0.232107
2.571	3.20782	2.90901	3.89739	2.61551	1.55062	2.73826	3.98017	2.56132	4.41592	3.00062	2.14956		2.96643	0.233964
2.60053	3.25169	2.94845	3.93447	2.65572	1.57376	2.78189	4.02299	2.59264	4.46627	3.03523	2.17884		3.00354	0.235759
2.62976	3.29484	2.98671	3.97135	2.69561	1.59706	2.82543	4.0649	2.62357	4.51642	3.06991	2.208		3.0403	0.237522
2.65926	3.33845	3.0239	4.00801	2.73521	1.62027	2.86921	4.10643	2.65416	4.56627	3.10538	2.23698		3.07696	0.239276
2.68902	3.38306	3.06022	4.0442	2.77474	1.64334	2.91251	4.1472	2.68437	4.61626	3.14111	2.2661		3.11351	0.241024
2.71855	3.42835	3.09623	4.07993	2.8144	1.66679	2.95529	4.18741	2.71408	4.66699	3.17675	2.29423		3.14992	0.242811
2.74744	3.47396	3.13271	4.11492	2.85438	1.69086	2.99769	4.22719	2.74342	4.71802	3.21189	2.32221		3.18622	0.244573
2.77608	3.51932	3.16966	4.14908	2.89452	1.71484	3.04017	4.26678	2.7727	4.7691	3.24675	2.35143		3.22254	0.246287
2.80467	3.56468	3.20682	4.18288	2.93441	1.73851	3.0826	4.3069	2.80188	4.8199	3.28225	2.38102		3.25888	0.248013
2.83339	3.61063	3.24372	4.21636	2.97427	1.76222	3.12476	4.34817	2.83094	4.86982	3.31888	2.41069		3.29532	0.249737
2.86225	3.65652	3.28015	4.24956	3.01423	1.78575	3.16672	4.38965	2.85975	4.91906	3.35656	2.43988		3.33167	0.25146
2.89125	3.70183	3.3171	4.28238	3.05449	1.80918	3.20873	4.43055	2.88827	4.96842	3.39479	2.46769		3.36789	0.253203
2.92074	3.74746	3.35497	4.31477	3.09538	1.83272	3.25156	4.47192	2.91692	5.01765	3.43352	2.49453		3.40434	0.254957
2.94999	3.79357	3.39339	4.34678	3.13679	1.85631	3.29476	4.5132	2.94565	5.06604	3.47274	2.52199		3.44094	0.256648
2.97866	3.83916	3.43224	4.37847	3.17874	1.88009	3.33811	4.55391	2.97422	5.11342	3.51184	2.55088		3.47748	0.258225
3.00709	3.88436	3.47124	4.40948	3.22107	1.9041	3.38183	4.59432	3.00273	5.15982	3.55081	2.58071		3.51396	0.259698
3.03566	3.92959	3.51013	4.43953	3.26355	1.92814	3.42582	4.63435	3.03119	5.20523	3.58992	2.61127		3.55036	0.261073
3.06472	3.97433	3.54873	4.4696	3.30547	1.95219	3.46981	4.67436	3.0595	5.24907	3.6291	2.64155		3.58653	0.262384
3.09386	4.01761	3.58693	4.49982	3.34621	1.97668	3.51332	4.71393	3.08752	5.2913	3.66828	2.67149		3.62224	0.263605
3.12282	4.05954	3.6247	4.52958	3.3864	2.00188	3.55712	4.75295	3.11536	5.33256	3.70711	2.70203		3.65767	0.264702
3.15171	4.10086	3.66207	4.55894	3.42629	2.02769	3.60144	4.7908	3.14299	5.37305	3.7455	2.73336		3.69289	0.265673
3.18068	4.14173	3.69863	4.58819	3.46597	2.05401	3.64581	4.82777	3.1703	5.41253	3.78386	2.76593		3.72795	0.266515
3.2097	4.18266	3.73437	4.61758	3.50597	2.08042	3.69019	4.86526	3.1974	5.45076	3.82262	2.80051		3.76312	0.26727
3.23879	4.22323	3.7698	4.64696	3.54577	2.10684	3.73434	4.9029	3.22399	5.48798	3.86159	2.83679		3.79825	0.267948
3.26832	4.26322	3.80517	4.67618	3.58475	2.13339	3.77803	4.94052	3.2501	5.52383	3.90058	2.87305		3.83309	0.268559
3.29808	4.30341	3.84051	4.70474	3.6231	2.16003	3.82079	4.9783	3.27597	5.55847	3.93979	2.90913		3.86769	0.26912
3.32809	4.34369	3.87579	4.73304	3.66124	2.18672	3.8628	5.01652	3.3016	5.59258	3.97907	2.9449		3.90217	0.269682
3.35835	4.3839	3.91082	4.76181	3.69959	2.21342	3.90435	5.05508	3.32711	5.62636	4.01846	2.97998		3.9366	0.270273
3.38854	4.42414	3.9452	4.79024	3.73842	2.2403	3.94597	5.09292	3.35249	5.66039	4.05826	3.01553		3.97103	0.270833
3.41899	4.4651	3.97909	4.81828	3.77811	2.26719	3.98809	5.12972	3.37769	5.69479	4.09843	3.05163		4.00559	0.271367
3.44952	4.50688	4.01295	4.84666	3.81848	2.29386	4.03004	5.16613	3.40279	5.72917	4.13905	3.08753		4.04025	0.271929
3.47975	4.54903	4.04687	4.87547	3.85945	2.32028	4.07173	5.20337	3.4278	5.76345	4.18026	3.12259		4.07501	0.272575
3.51003	4.59163	4.08117	4.90427	3.90102	2.3464	4.1133	5.24145	3.45284	5.79778	4.22125	3.15683		4.10983	0.273296
3.54057	4.63416	4.11577	4.93251	3.94264	2.3724	4.15491	5.27935	3.47791	5.83205	4.26084	3.19055		4.14447	0.274015
3.571	4.67677	4.1504	4.96037	3.98486	2.39849	4.19662	5.31709	3.503	5.86622	4.29928	3.22336		4.17896	0.274741
3.60094	4.71954	4.18505	4.98818	4.02822	2.4246	4.23853	5.35489	3.5282	5.90113	4.33702	3.25539		4.21348	0.275531
3.63074	4.76178	4.21965	5.01642	4.07206	2.45052	4.28142	5.39244	3.55356	5.9364	4.37398	3.28696		4.24799	0.276359
3.66068	4.80354	4.25433	5.04506	4.1156	2.4764	4.32529	5.42949	3.57886	5.97151	4.41046	3.31887		4.28251	0.277168
3.69101	4.84525	4.28934	5.07343	4.15855	2.5024	4.36995	5.46637	3.60377	6.00642	4.44672	3.35074		4.31699	0.277965
3.72179	4.88742	4.32499	5.10176	4.20167	2.52831	4.41501	5.50391	3.62848	6.0403	4.48291	3.38163		4.35151	0.278777
3.75201	4.92993	4.36112	5.13031	4.24559	2.55431	4.46002	5.54225	3.65331	6.07358	4.51908	3.41235		4.38616	0.279611
3.78162	4.97208	4.39736	5.15871	4.28958	2.58064	4.50511	5.58067	3.67801	6.10683	4.55519	3.44343		4.42077	0.280436
3.81112	5.01344	4.43373	5.18693	4.33285	2.60735	4.55021	5.61876	3.70255	6.13977	4.59108	3.47526		4.45526	0.281201
3.84014	5.05407	4.47042	5.21507	4.37567	2.63423	4.5956	5.65645	3.72714	6.17251	4.62719	3.50764		4.48968	0.28193
3.86866	5.09454	4.50724	5.2433	4.41854	2.66109	4.6406	5.69394	3.75168	6.20508	4.66453	3.53982		4.52408	0.282675
3.89696	5.13477	4.54401	5.27167	4.46151	2.68782	4.68434	5.73151	3.77612	6.23723	4.70302	3.5723		4.55844	0.283417
3.92556	5.17475	4.58084	5.30002	4.50454	2.71452	4.72733	5.76909	3.80027	6.26903	4.74217	3.60569		4.59282	0.284128
3.95458	5.21499	4.61746	5.32833	4.54761	2.74152	4.76953	5.8069	3.82403	6.30099	4.78179	3.63937		4.62726	0.284845
3.98377	5.25534	4.65375	5.35662	4.59116	2.76864	4.81131	5.84497	3.84774	6.33293	4.8216	3.67272		4.66171	0.285579
4.01319	5.29557	4.68994	5.38531	4.6354	2.79569	4.8528	5.88272	3.87163	6.36513	4.86158	3.70667		4.6963	0.286309
4.0428	5.33559	4.72607	5.41436	4.6797	2.82284	4.89377	5.91984	3.89559	6.39832	4.90173	3.74138		4.731	0.287044
4.07327	5.37547	4.76215	5.44335	4.7239	2.84998	4.9344	5.95661	3.91948	6.43181	4.94179	3.77549		4.76564	0.287788
4.10494	5.41522	4.79806	5.47235	4.76879	2.87661	4.97444	5.99345	3.94354	6.46525	4.9819	3.80862		4.80027	0.288561
4.13747	5.45474	4.83384	5.50099	4.81475	2.90234	5.01368	6.03042	3.96772	6.49848	5.0223	3.84111		4.83482	0.289369
4.17067	5.49431	4.86932	5.52945	4.86119	2.92737	5.05199	6.06727	3.9917	6.5313	5.06262	3.87356		4.86923	0.290186
4.20414	5.53352	4.90453	5.5582	4.90756	2.95227	5.09048	6.10403	4.01561	6.56412	5.10275	3.90648		4.90364	0.291001
4.23816	5.57249	4.93975	5.58709	4.95373	2.97719	5.13016	6.14043	4.03975	6.59661	5.14295	3.9395		4.93815	0.291786
4.27298	5.61127	4.97497	5.61614	4.99949	3.00213	5.17044	6.17584	4.06419	6.62845	5.18341	3.97211		4.97262	0.292513
4.30828	5.64896	5.01058	5.64556	5.0451	3.02713	5.21063	6.21078	4.0889	6.65995	5.22422	4.00468		5.00706	0.293193
4.34396	5.68619	5.04665	5.67546	5.0906	3.05202	5.25051	6.24589	4.11383	6.69118	5.26473	4.03741		5.04154	0.293862
4.37988	5.72328	5.08273	5.7056	5.1356	3.07705	5.29015	6.28068	4.13891	6.7219	5.3047	4.06982		5.07586	0.294499
4.41614	5.76009	5.11897	5.73585	5.18052	3.10214	5.32926	6.31522	4.16405	6.7524	5.34448	4.10256		5.11014	0.295101
4.45262	5.79665	5.15542	5.76651	5.2253	3.12695	5.36794	6.34994	4.1893	6.78272	5.38407	4.13549		5.14441	0.295711
4.48895	5.83269	5.19187	5.79691	5.26986	3.15209	5.40671	6.38471	4.2146	6.81244	5.42372	4.16744		5.1785	0.296303
4.52519	5.86881	5.22835	5.82622	5.31417	3.1784	5.44608	6.41968	4.24006	6.84176	5.46354	4.1979		5.21251	0.296856
4.56164	5.90519	5.2652	5.85474	5.35772	3.20584	5.48624	6.45514	4.26587	6.87072	5.50324	4.22719		5.24656	0.297372
4.59894	5.9416	5.30252	5.88322	5.40123	3.23383	5.52675	6.49104	4.29195	6.89929	5.5426	4.25664		5.2808	0.297839
4.63694	5.9774	5.33988	5.91206	5.44489	3.26192	5.56705	6.52712	4.31809	6.92782	5.58105	4.2865		5.31506	0.298278
4.67522	6.01307	5.37733	5.94109	5.48917	3.29017	5.60767	6.56334	4.34454	6.95633	5.61847	4.31672		5.34943	0.298696
4.71331	6.04951	5.41468	5.96962	5.53438	3.31846	5.64932	6.59926	4.37128	6.98413	5.65547	4.34604		5.38379	0.299115
4.75071	6.08591	5.45192	5.99751	5.57988	3.34676	5.69113	6.63502	4.39768	7.01124	5.69267	4.3735		5.41783	0.299573
4.78799	6.12193	5.48946	6.02536	5.62592	3.37508	5.73314	6.67188	4.42419	7.0382	5.72991	4.40064		5.45197	0.300074
4.82509	6.15635	5.52641	6.05318	5.67173	3.4027	5.77566	6.70959	4.45086	7.06429	5.76597	4.42709		5.48574	0.300597
4.86258	6.18959	5.56332	6.08107	5.71792	3.43022	5.81915	6.74823	4.47776	7.09014	5.80126	4.45368		5.51958	0.301126
4.90043	6.22248	5.60058	6.10941	5.76449	3.45781	5.8628	6.78708	4.50477	7.11578	5.83575	4.48154		5.55358	0.301617
4.93841	6.25438	5.63807	6.13931	5.81124	3.4852	5.90589	6.82538	4.53153	7.14113	5.86975	4.5106		5.58757	0.302073
4.97684	6.2855	5.67617	6.17044	5.85935	3.51285	5.94918	6.86381	4.55836	7.16697	5.90459	4.54021		5.62202	0.302547
5.01451	6.31591	5.71346	6.20101	5.90731	3.53997	5.99109	6.90119	4.58484	7.19252	5.93951	4.56786		5.65576	0.303059
5.05285	6.34775	5.75103	6.232	5.95604	3.56745	6.03265	6.93849	4.61191	7.21888	5.97583	4.59455		5.68995	0.303636
5.09093	6.37969	5.78813	6.26273	6.00414	3.59455	6.07273	6.97544	4.63855	7.24529	6.01233	4.61988		5.7237	0.304269
5.12966	6.41229	5.82547	6.29422	6.05156	3.62185	6.11217	7.0128	4.66506	7.27227	6.04911	4.64539		5.75765	0.304939
5.16926	6.44555	5.8633	6.32648	6.09858	3.64954	6.15243	7.05061	4.6923	7.29984	6.08652	4.67257		5.79225	0.305587
5.20766	6.47821	5.90025	6.35794	6.14424	3.67657	6.19188	7.0874	4.71898	7.32667	6.12365	4.6993		5.82606	0.306224
5.24795	6.51478	5.93946	6.39074	6.19238	3.7057	6.2333	7.12555	4.74654	7.35521	6.16372	4.72714		5.86187	0.306926
5.28614	6.55068	5.97674	6.42164	6.23814	3.7339	6.27226	7.16048	4.77257	7.3823	6.20232	4.75329		5.89587	0.307561
5.32668	6.58965	6.01622	6.45447	6.28601	3.76381	6.3136	7.19666	4.80003	7.41131	6.24355	4.78078		5.9319	0.30825
5.36642	6.62895	6.05453	6.48653	6.33247	3.793	6.35404	7.23211	4.82696	7.4401	6.2839	4.80735		5.9672	0.308976
5.40445	6.6675	6.09056	6.51728	6.37619	3.82073	6.39196	7.26536	4.85273	7.46751	6.32203	4.83284		6.00076	0.309659
5.45088	6.71504	6.13494	6.55488	6.4283	3.85452	6.43907	7.30599	4.88372	7.50087	6.36807	4.86531		6.0418	0.310481
5.47962	6.74455	6.1627	6.57812	6.46034	3.87549	6.46878	7.33144	4.90278	7.52157	6.39652	4.8858		6.06731	0.310999
