# Supplementary material for: How spatial release from masking may fail to function in a highly directional auditory system
Source: eLife. 2017 Apr 25;6:e20731. doi: 10.7554/eLife.20731 (PMC5443663; doi:10.7554/eLife.20731)
Supplement: Figure 5—source data 4. — The target signal was presented at 76 dB SPL from a forward speaker while two coherent maskers were presented at the same combined intensity from adjacent speakers to the left and right of the signal speaker. ‘X’ and ‘Y’ coordinates of virtual walking paths measured from the treadmill system. Data plotted in Figure 5D. DOI: http://dx.doi.org/10.7554/eLife.20731.020 [file elife-20731-fig5-data4.xlsx]

## Sheet: noise both 10 x
fly1	fly2	fly3	fly4	fly5	fly6	fly7	fly8	fly9	fly10	fly11	fly12		Avg	SEM
-1.43425e-07	-3.61463e-08	-3.56687e-06	1.70164e-07	-5.10418e-08	0.00010344	2.631e-07	3.25816e-07	5.99698e-07	-6.87314e-08	-0.000103628	-4.34992e-05		-3.8495e-06	1.32477e-05
-8.47277e-07	5.29863e-07	4.52888e-05	1.92723e-07	2.25714e-07	0.00019424	-9.3384e-08	-7.09523e-07	-6.99084e-07	-9.02285e-09	-0.000194907	-7.38142e-05		-2.55015e-06	2.5097e-05
2.43475e-06	-1.0521e-06	0.000118191	-7.58957e-07	-3.92436e-07	0.000270568	-1.58007e-07	-1.25356e-07	6.06096e-07	1.15897e-07	-0.000272877	-9.98265e-05		1.39372e-06	3.60542e-05
-2.39847e-06	1.42652e-06	0.000182992	1.11841e-06	5.05755e-07	0.00034281	5.44246e-07	-8.6755e-07	-2.59576e-07	-2.26987e-07	-0.000342252	-9.1589e-05		7.65029e-06	4.57131e-05
5.17634e-06	-1.59985e-06	0.000223377	-1.55126e-06	-4.92315e-07	0.000400579	-1.07056e-06	-8.24186e-07	-1.86615e-07	3.00316e-07	-0.000407566	-0.000100871		9.60585e-06	5.40463e-05
-2.246e-06	1.35806e-06	0.000254595	1.7207e-06	3.68172e-07	0.000478267	8.39763e-07	-1.51308e-06	7.94054e-07	-3.14706e-07	-0.000446241	-7.82834e-05		1.74453e-05	6.12483e-05
5.3755e-06	9.65038e-08	0.000313643	-2.02397e-06	9.14938e-09	0.000591139	-1.71233e-06	1.86823e-05	-1.79463e-06	2.36729e-07	-0.000446972	-5.25642e-05		3.53429e-05	6.94002e-05
-2.61606e-06	-7.30039e-08	0.000342628	2.52328e-06	-7.06344e-07	0.000705863	-1.34034e-07	8.31021e-05	1.10801e-06	-1.16854e-07	-0.000448824	-8.74924e-05		4.96051e-05	7.79534e-05
-8.69736e-05	4.49929e-06	0.000339322	1.9085e-05	7.64396e-07	0.000818235	-6.39915e-07	0.000133299	-4.19045e-06	-1.83492e-07	-0.000434206	-4.71361e-05		6.18229e-05	8.50702e-05
-0.000200394	-3.21786e-06	0.000357322	1.60313e-05	-2.81031e-06	0.000934264	-3.88635e-06	0.000204146	-6.75512e-07	8.67362e-07	-0.00037668	2.67711e-05		7.93116e-05	9.33295e-05
-0.000386994	1.11379e-05	0.000368625	1.9199e-05	-2.81288e-08	0.00104155	2.91093e-05	0.000297535	-7.70551e-06	-5.14357e-07	-0.000321614	8.89964e-05		9.49413e-05	0.000105299
-0.000546974	-2.22301e-05	0.000369726	8.18673e-06	-5.5028e-06	0.00116144	9.07664e-05	0.000322236	1.49527e-06	2.34674e-06	-0.000224046	0.000289842		0.000120607	0.000118614
-0.00066569	-0.000113517	0.000348752	4.95639e-05	-2.28987e-06	0.00130803	0.000168708	0.000322269	8.82765e-05	3.80353e-07	4.88799e-05	0.000675994		0.00018578	0.000136968
-0.000735691	-0.000261278	0.000354673	0.000215709	3.60463e-05	0.0014202	0.000251131	0.000241331	0.000225982	4.31843e-06	0.000503889	0.00121336		0.00028914	0.000167319
-0.000690191	-0.000475164	0.000319552	0.000503217	0.000115859	0.00154195	0.000346814	8.27783e-05	0.000517321	1.13868e-06	0.00110865	0.00199544		0.00044728	0.00022451
-0.000769734	-0.000655281	0.000146648	0.000933582	0.000286498	0.00171437	0.00046582	-6.05636e-05	0.000948746	-5.47985e-05	0.00193834	0.00306603		0.000663305	0.000324946
-0.000959873	-0.000855706	-3.65317e-05	0.00144333	0.00058377	0.00185604	0.000658436	-0.000310298	0.00153232	-0.000151986	0.00308273	0.00443026		0.000939375	0.000468444
-0.00111213	-0.00102346	-0.000333159	0.00211657	0.00103788	0.00206637	0.000915408	-0.000739113	0.0024781	-0.000292038	0.00452335	0.00623326		0.00132259	0.00066376
-0.0012231	-0.00107873	-0.00080283	0.0029874	0.00160105	0.0023991	0.00113107	-0.00129455	0.00376409	-0.000522756	0.00626957	0.00843937		0.00180581	0.000910144
-0.00131381	-0.000959139	-0.00134366	0.00400398	0.00229303	0.00269587	0.00143499	-0.00198333	0.00539555	-0.000886564	0.00836975	0.0109683		0.00238958	0.00120207
-0.00134844	-0.000637621	-0.00201107	0.00522004	0.00314889	0.00295958	0.00179324	-0.0029849	0.00751978	-0.00134827	0.0107532	0.0139419		0.00308386	0.00155351
-0.00140501	-0.000205587	-0.00285974	0.00661841	0.00418031	0.00327261	0.00210605	-0.00435769	0.010244	-0.00190563	0.0134645	0.0173521		0.00387536	0.0019778
-0.001733	0.000429562	-0.00385254	0.00828148	0.00549501	0.00356601	0.00245059	-0.00596048	0.0134208	-0.00260817	0.0165582	0.0209772		0.00475206	0.00246369
-0.00222266	0.00130192	-0.00492213	0.0101612	0.00695996	0.00381834	0.00275225	-0.00777146	0.0169584	-0.00347329	0.0199767	0.02469		0.00568576	0.00299682
-0.00290242	0.00253484	-0.00621881	0.0121373	0.00855698	0.00407831	0.00309948	-0.00975518	0.0210863	-0.00456047	0.0237043	0.0285401		0.00669173	0.00358868
-0.00371344	0.00408205	-0.00759572	0.0141993	0.0103149	0.00425168	0.00347976	-0.0119462	0.0257218	-0.00584819	0.0276662	0.0325385		0.00776256	0.00423367
-0.00429567	0.00580785	-0.00890239	0.0163975	0.0120168	0.00426541	0.00376737	-0.0144375	0.0308725	-0.00729801	0.031868	0.0366324		0.00889119	0.00492426
-0.00471778	0.00771117	-0.0103429	0.018863	0.0136034	0.0041869	0.00394007	-0.0171919	0.0365526	-0.00892138	0.0363339	0.0406427		0.010055	0.00566262
-0.00514315	0.00957914	-0.0117343	0.0214593	0.0150582	0.00401085	0.00396048	-0.0201728	0.0424953	-0.0106671	0.0411395	0.044496		0.0112068	0.00643543
-0.00568291	0.0116083	-0.0130105	0.0240715	0.016506	0.00374131	0.00387919	-0.0234093	0.048786	-0.0124805	0.0463977	0.0483487		0.0123963	0.00725478
-0.0062755	0.0136795	-0.0142846	0.0266915	0.018021	0.00348191	0.00367481	-0.0268974	0.0553799	-0.0143924	0.0519782	0.0520363		0.0135911	0.00811089
-0.00683149	0.0155745	-0.015579	0.0293635	0.0194894	0.0031506	0.00339779	-0.030445	0.0620619	-0.0164376	0.0579074	0.0553503		0.0147502	0.00898245
-0.00730773	0.0177176	-0.0168297	0.0321577	0.0208682	0.00267515	0.00299688	-0.0340087	0.0688009	-0.0185208	0.0642833	0.0585063		0.0159449	0.00987571
-0.00755528	0.0200423	-0.0180424	0.0348866	0.022082	0.00215676	0.0025	-0.0377333	0.0754673	-0.0206315	0.0708843	0.0618772		0.0171612	0.0107886
-0.00767718	0.0222973	-0.0193505	0.0376109	0.0231909	0.00159513	0.00196548	-0.0416041	0.0819292	-0.0227944	0.077595	0.0656275		0.0183654	0.0117205
-0.00766601	0.0243032	-0.0204676	0.0404284	0.0241775	0.000954816	0.00113987	-0.0455621	0.0881464	-0.0249651	0.084693	0.0695839		0.0195639	0.0126672
-0.00766445	0.0258592	-0.0214901	0.0431969	0.0249872	0.000242127	8.92143e-05	-0.0494706	0.0940386	-0.0271704	0.0923941	0.0734964		0.020709	0.0136239
-0.00811595	0.0270143	-0.0226292	0.0459144	0.0258526	-0.000450309	-0.00113057	-0.0532172	0.0994722	-0.0293563	0.100608	0.0774003		0.0217802	0.014589
-0.00898816	0.0279875	-0.0236914	0.0485398	0.0268852	-0.00112279	-0.0025371	-0.0567338	0.104387	-0.0314405	0.109205	0.081612		0.0228418	0.0155556
-0.0101066	0.0289295	-0.0247628	0.0510197	0.027906	-0.00180134	-0.00398519	-0.0598884	0.108804	-0.0335696	0.118085	0.0859477		0.0238815	0.0165127
-0.0113746	0.0295427	-0.0258947	0.0534302	0.0286642	-0.00244199	-0.00552111	-0.0626799	0.112755	-0.0357976	0.127173	0.0901973		0.0248377	0.0174545
-0.0128829	0.0298521	-0.0270959	0.0558308	0.0291249	-0.00312826	-0.0072472	-0.0651881	0.116264	-0.0379279	0.136414	0.0947427		0.0257298	0.0183948
-0.0149164	0.0299007	-0.0283306	0.0581184	0.0293794	-0.00368517	-0.00915051	-0.0673609	0.119195	-0.0400645	0.145762	0.0996991		0.0265455	0.0193332
-0.0173628	0.0291163	-0.02959	0.0601891	0.029367	-0.00411453	-0.0111314	-0.0690294	0.121557	-0.0423367	0.15515	0.104847		0.0272218	0.0202553
-0.0201052	0.0278475	-0.0308245	0.0620391	0.0291607	-0.00458698	-0.013333	-0.070238	0.123623	-0.0446528	0.164734	0.109622		0.0277738	0.0211659
-0.0231627	0.026624	-0.0319315	0.0635954	0.0288542	-0.00499111	-0.0157416	-0.0709581	0.125362	-0.0469635	0.174524	0.113784		0.0282496	0.0220536
-0.0265737	0.0252399	-0.0330963	0.0648405	0.0284794	-0.00528665	-0.0181184	-0.0711187	0.126716	-0.0492391	0.184102	0.117624		0.0286306	0.0229032
-0.0302586	0.0239068	-0.0342037	0.0659006	0.0280677	-0.00541581	-0.0204706	-0.0710401	0.127786	-0.0515879	0.193343	0.121291		0.0289432	0.0237273
-0.0339092	0.0225698	-0.0351309	0.0668016	0.0274178	-0.00544586	-0.0227197	-0.0708231	0.128649	-0.0540322	0.20222	0.125064		0.0292217	0.0245299
-0.0377818	0.0210753	-0.0359915	0.0674533	0.0264374	-0.00537509	-0.0249098	-0.0704546	0.12938	-0.0566166	0.210807	0.129167		0.0294326	0.0253315
-0.0421	0.0193924	-0.0367118	0.0679123	0.025283	-0.00523453	-0.0271107	-0.0700566	0.129785	-0.0592742	0.219145	0.133707		0.0295614	0.0261393
-0.0466578	0.0174748	-0.0372812	0.0682977	0.024117	-0.0050382	-0.0291726	-0.0694692	0.129729	-0.0617531	0.227024	0.138321		0.0296326	0.0269116
-0.0513395	0.0157666	-0.037659	0.0685635	0.0228475	-0.00464641	-0.0310609	-0.0686501	0.129241	-0.0641933	0.234641	0.142593		0.0296752	0.0276436
-0.0561533	0.0141897	-0.037786	0.0686682	0.0214657	-0.00428926	-0.0327566	-0.0678185	0.128437	-0.0665602	0.241966	0.146455		0.0296515	0.0283407
-0.0611346	0.0126825	-0.0376797	0.0687542	0.0201629	-0.00390681	-0.0342216	-0.0669887	0.127403	-0.0687248	0.248885	0.149856		0.0295905	0.0289949
-0.0661608	0.011242	-0.0374183	0.0689431	0.0188505	-0.00330945	-0.0353227	-0.0660081	0.125972	-0.0708573	0.255499	0.153305		0.0295613	0.0296205
-0.0712838	0.00965869	-0.0371607	0.0692308	0.0175451	-0.00257314	-0.0360575	-0.0649087	0.124119	-0.0729257	0.261727	0.157048		0.0295349	0.0302261
-0.0764765	0.00825871	-0.0369141	0.0696126	0.0162266	-0.00174804	-0.0365803	-0.0636981	0.121785	-0.0748289	0.267806	0.160893		0.029528	0.0308174
-0.081715	0.00707464	-0.0365531	0.070021	0.0148964	-0.000858318	-0.0367748	-0.0622876	0.11902	-0.0765563	0.273876	0.164969		0.0295927	0.0314019
-0.0870431	0.00595184	-0.0360558	0.0704223	0.0137578	0.000197669	-0.03672	-0.0607444	0.115849	-0.078084	0.279709	0.169162		0.0297002	0.0319664
-0.0922553	0.00479108	-0.0355171	0.0709365	0.0127946	0.0012828	-0.0365377	-0.0590257	0.112173	-0.0793318	0.285149	0.172904		0.0297803	0.0324798
-0.0972546	0.00382644	-0.0349329	0.0715207	0.0119756	0.00238622	-0.0361109	-0.0570675	0.108107	-0.0804153	0.290329	0.176226		0.0298825	0.0329489
-0.102064	0.0029959	-0.034274	0.0719844	0.011307	0.00354309	-0.0355528	-0.0549318	0.103671	-0.0815644	0.295421	0.179853		0.0300324	0.0334168
-0.106866	0.00195496	-0.0335879	0.072426	0.0108877	0.00472479	-0.0349308	-0.0525171	0.0989414	-0.0826974	0.300378	0.183858		0.0302142	0.0338916
-0.111641	0.00130106	-0.0329089	0.0729487	0.0107726	0.00607329	-0.0342875	-0.0497903	0.0938109	-0.0837918	0.305386	0.188263		0.0305114	0.034381
-0.116433	0.000860021	-0.0322718	0.0734182	0.0109211	0.00746496	-0.0337264	-0.046815	0.0882407	-0.0849247	0.310425	0.193109		0.0308556	0.034894
-0.121412	0.000142261	-0.0315836	0.0738268	0.0112287	0.00889947	-0.0332821	-0.0436308	0.0825612	-0.0860271	0.315267	0.198066		0.0311714	0.0354181
-0.126554	-0.000650233	-0.0307712	0.0740578	0.0114705	0.0103649	-0.0328941	-0.0404119	0.0768763	-0.0871235	0.319972	0.203208		0.031462	0.0359608
-0.132074	-0.00160106	-0.0299059	0.0740219	0.0117888	0.0118239	-0.0325288	-0.0372038	0.0711967	-0.0882478	0.324358	0.208442		0.0316725	0.0365165
-0.137863	-0.00278187	-0.0290277	0.0738599	0.0123849	0.0134195	-0.0322413	-0.0338521	0.065391	-0.0893602	0.328412	0.213605		0.0318289	0.0370725
-0.143778	-0.00410181	-0.0281446	0.0735433	0.0131629	0.0151188	-0.0317722	-0.0302237	0.0593315	-0.0905367	0.332445	0.218767		0.0319843	0.0376421
-0.149752	-0.00537907	-0.0272623	0.0730894	0.0141663	0.0169075	-0.0310744	-0.0263839	0.0531383	-0.0918097	0.336458	0.22402		0.0321765	0.0382284
-0.155555	-0.00681196	-0.0263815	0.0725891	0.0154774	0.0187369	-0.030308	-0.0225161	0.0468988	-0.0929501	0.340316	0.229244		0.0323949	0.0388118
-0.161528	-0.0084627	-0.0254476	0.0720599	0.0169512	0.0206875	-0.0294232	-0.018602	0.0406111	-0.0939061	0.343818	0.234082		0.0325699	0.0393771
-0.167864	-0.0104279	-0.0244811	0.0715176	0.0186046	0.0228473	-0.0284061	-0.0145796	0.03428	-0.0948628	0.346816	0.238713		0.0326798	0.0399348
-0.174181	-0.0131041	-0.0235702	0.0708851	0.0204406	0.0251593	-0.0271798	-0.0104677	0.0279966	-0.095748	0.349462	0.243174		0.0327389	0.0404835
-0.180352	-0.0160057	-0.0227455	0.0701294	0.0223098	0.0277027	-0.0257615	-0.00627253	0.0216168	-0.0964158	0.351942	0.247255		0.0327835	0.0410147
-0.186444	-0.0189106	-0.0220316	0.0692993	0.0244557	0.0304659	-0.0241889	-0.00199762	0.0150193	-0.0968961	0.354268	0.251049		0.0328407	0.0415355
-0.192317	-0.0219983	-0.0213453	0.0685369	0.0270954	0.0335763	-0.0225198	0.00234801	0.00833593	-0.0972207	0.356526	0.25461		0.032969	0.0420509
-0.197841	-0.0251773	-0.0207581	0.0679189	0.0300407	0.0371227	-0.0208103	0.00664579	0.00148371	-0.0973766	0.358806	0.258023		0.033173	0.0425666
-0.203138	-0.0284759	-0.0204193	0.0673247	0.0330416	0.0409642	-0.0191892	0.0108553	-0.00546175	-0.0973787	0.360914	0.261098		0.0333446	0.0430717
-0.208233	-0.0318123	-0.0201302	0.0667107	0.0360811	0.0451448	-0.017872	0.0150355	-0.012412	-0.097257	0.362978	0.263738		0.0334976	0.0435692
-0.213301	-0.0352587	-0.0197666	0.0660204	0.0392301	0.0497286	-0.0166768	0.0191672	-0.0194216	-0.0969927	0.365162	0.266107		0.0336665	0.0440804
-0.218762	-0.0387569	-0.0194454	0.065285	0.0424527	0.054655	-0.0155114	0.0232769	-0.0264199	-0.0966857	0.36732	0.268501		0.0338258	0.0446284
-0.224242	-0.0421122	-0.0192324	0.0645748	0.0457883	0.0598091	-0.0145161	0.0272806	-0.0336479	-0.0964109	0.369804	0.271152		0.0340206	0.0452303
-0.229426	-0.0453385	-0.0191763	0.0637649	0.0491119	0.0651905	-0.01375	0.0311113	-0.0408708	-0.0959987	0.372751	0.27372		0.0342575	0.0458599
-0.234641	-0.0484401	-0.019132	0.0629915	0.0524778	0.0708051	-0.0131852	0.0349174	-0.0477549	-0.0955432	0.375764	0.276358		0.0345514	0.0465111
-0.239778	-0.0514537	-0.0188726	0.0624289	0.056115	0.0765635	-0.0127592	0.0387494	-0.0544973	-0.0952386	0.37866	0.27938		0.0349414	0.0471857
-0.24472	-0.0544918	-0.0186005	0.0619294	0.0598397	0.0824776	-0.0125246	0.0426126	-0.0610349	-0.0949224	0.381527	0.282592		0.0353903	0.0478731
-0.24949	-0.0576958	-0.01843	0.0615544	0.0634233	0.0884737	-0.0123465	0.0465654	-0.0673842	-0.0945265	0.384525	0.28589		0.0358799	0.0485778
-0.254193	-0.0610629	-0.0180582	0.0614083	0.0667736	0.0944504	-0.0121653	0.0506361	-0.0735489	-0.0939729	0.387597	0.289151		0.0364179	0.0492902
-0.259025	-0.0646832	-0.0175074	0.0614719	0.0700544	0.100401	-0.0120835	0.0547024	-0.0795374	-0.0931223	0.390799	0.292464		0.0369946	0.0500245
-0.263827	-0.0686749	-0.0170615	0.0618509	0.0732867	0.106266	-0.0120421	0.0586175	-0.0853258	-0.0920774	0.394181	0.295807		0.0375834	0.0507796
-0.268486	-0.072925	-0.0167793	0.062454	0.0762718	0.111957	-0.0121055	0.0625516	-0.0909603	-0.0909042	0.397647	0.299033		0.0381461	0.0515381
-0.272951	-0.0773358	-0.0165307	0.06322	0.0792174	0.117532	-0.0123881	0.0667	-0.0964347	-0.0896133	0.401279	0.302203		0.0387414	0.0523042
-0.277335	-0.0819542	-0.0162655	0.0642721	0.0823344	0.123084	-0.0128056	0.0710692	-0.101342	-0.0881825	0.405044	0.305335		0.0394378	0.0530753
-0.281672	-0.0867944	-0.0160267	0.065554	0.0856682	0.1285	-0.0132389	0.0756167	-0.106018	-0.0865379	0.408942	0.308374		0.0401972	0.0538543
-0.285692	-0.091746	-0.0158725	0.066903	0.0890625	0.133832	-0.0137847	0.0801906	-0.110793	-0.0846283	0.413099	0.311176		0.0409789	0.0546335
-0.28952	-0.0967445	-0.0159783	0.0683739	0.0921855	0.139131	-0.01444	0.0846737	-0.115503	-0.0824339	0.417515	0.31394		0.0417666	0.0554203
-0.293319	-0.101648	-0.0161533	0.0701876	0.0950806	0.144227	-0.0151236	0.0891193	-0.120175	-0.0801476	0.422068	0.316659		0.0425647	0.056213
-0.296974	-0.106273	-0.0162579	0.0722167	0.0980996	0.149209	-0.0160119	0.0935976	-0.124865	-0.0778532	0.426658	0.319101		0.0433872	0.0569952
-0.300384	-0.110483	-0.0165374	0.074386	0.101451	0.15409	-0.0170426	0.0982433	-0.129636	-0.0754786	0.431416	0.321495		0.0442933	0.0577783
-0.303503	-0.114128	-0.0167807	0.0767597	0.105019	0.158713	-0.0180741	0.103205	-0.134343	-0.0730746	0.436344	0.323725		0.0453219	0.0585457
-0.306387	-0.117093	-0.0167581	0.0791892	0.108774	0.163171	-0.0191233	0.108385	-0.138962	-0.0706113	0.441194	0.325703		0.0464569	0.0592783
-0.309014	-0.119436	-0.0165214	0.0818031	0.112792	0.167548	-0.0202384	0.113654	-0.143311	-0.0680859	0.446009	0.327658		0.0477382	0.0599842
-0.3112	-0.121388	-0.0161237	0.0846202	0.116918	0.171767	-0.0213972	0.118918	-0.147356	-0.0655342	0.450881	0.329316		0.0491183	0.0606514
-0.312894	-0.122866	-0.015566	0.0875812	0.121097	0.175704	-0.0223733	0.124228	-0.151353	-0.0629194	0.455707	0.330551		0.0505747	0.0612673
-0.314318	-0.123689	-0.0147424	0.0908447	0.125373	0.179342	-0.0232756	0.12968	-0.155125	-0.060266	0.460504	0.331653		0.052165	0.0618468
-0.315617	-0.123831	-0.013639	0.094335	0.129685	0.182662	-0.0241064	0.135105	-0.15861	-0.0576475	0.465295	0.33269		0.0538601	0.0623955
-0.316827	-0.123501	-0.0122436	0.0978747	0.134147	0.185633	-0.0247882	0.14062	-0.161785	-0.0549903	0.470218	0.333548		0.0556587	0.0629206
-0.317823	-0.123047	-0.0107462	0.101384	0.13887	0.188358	-0.0256024	0.146337	-0.164705	-0.0520226	0.475257	0.334222		0.0575402	0.0634284
-0.31854	-0.122676	-0.00926113	0.105014	0.143724	0.190801	-0.0265128	0.152237	-0.167516	-0.0488229	0.480193	0.334742		0.0594486	0.0639155
-0.319088	-0.122625	-0.00757177	0.108836	0.148577	0.192984	-0.0274632	0.158392	-0.170164	-0.0456398	0.485098	0.335114		0.0613708	0.0643958
-0.319295	-0.12261	-0.00581471	0.11277	0.153416	0.195013	-0.0284858	0.164516	-0.17262	-0.0423923	0.490021	0.335653		0.0633476	0.0648659
-0.319148	-0.122426	-0.00419614	0.116759	0.158326	0.196814	-0.0295588	0.170631	-0.174926	-0.0391326	0.495018	0.336422		0.0653818	0.0653279
-0.31879	-0.12228	-0.00257795	0.120696	0.163261	0.198415	-0.030675	0.177006	-0.177223	-0.0358589	0.500192	0.33712		0.0674405	0.0657939
-0.318308	-0.122109	-0.000930849	0.124736	0.16816	0.199783	-0.0317994	0.183524	-0.179464	-0.0322967	0.505517	0.338006		0.0695681	0.0662664
-0.31757	-0.122	0.000611682	0.128924	0.173063	0.200937	-0.033078	0.189965	-0.181691	-0.0284515	0.510996	0.339101		0.0717339	0.0667448
-0.316325	-0.121996	0.00210715	0.133245	0.177989	0.201952	-0.0344559	0.196377	-0.184146	-0.02445	0.516555	0.34006		0.0739094	0.0672143
-0.314773	-0.12215	0.00365185	0.137779	0.182996	0.202778	-0.0358335	0.203173	-0.186782	-0.0202926	0.522115	0.340855		0.0761265	0.0676842
-0.312917	-0.12225	0.00524274	0.142453	0.188106	0.203543	-0.0372022	0.21026	-0.189408	-0.0160515	0.527644	0.341433		0.0784044	0.0681431
-0.310929	-0.121882	0.00699502	0.147265	0.193287	0.20425	-0.0383542	0.217356	-0.19193	-0.0118632	0.533169	0.341795		0.0807632	0.0685819
-0.308971	-0.120913	0.00892224	0.151976	0.198489	0.204744	-0.0392772	0.224434	-0.194355	-0.00778023	0.538821	0.342088		0.0831815	0.0690107
-0.30656	-0.119236	0.0107953	0.156561	0.203765	0.204885	-0.040071	0.231369	-0.196744	-0.00374546	0.54448	0.342384		0.0856568	0.0694034
-0.303953	-0.117169	0.0125836	0.161229	0.209098	0.204711	-0.0407006	0.238399	-0.199177	0.000284334	0.5499	0.342495		0.0881416	0.0697683
-0.301447	-0.114846	0.0143891	0.165906	0.214358	0.204293	-0.0411399	0.245546	-0.20159	0.00438672	0.55512	0.342449		0.0906187	0.0701194
-0.298785	-0.112151	0.0160468	0.170616	0.219708	0.203579	-0.0412756	0.252574	-0.204033	0.00856552	0.560125	0.342401		0.0931143	0.0704461
-0.295945	-0.10925	0.0175071	0.175156	0.225189	0.202665	-0.0412248	0.259541	-0.206579	0.012706	0.564813	0.341883		0.0955385	0.0707403
-0.292874	-0.106167	0.0189238	0.179349	0.23063	0.201497	-0.0411244	0.266604	-0.209082	0.0169986	0.569161	0.340917		0.0979027	0.0709932
-0.289573	-0.102859	0.0202304	0.183206	0.236007	0.200164	-0.040855	0.273815	-0.211505	0.0215123	0.573159	0.339931		0.100269	0.071214
-0.286	-0.0992526	0.0212632	0.186695	0.241291	0.198754	-0.0406163	0.280761	-0.213917	0.0260084	0.576945	0.338752		0.102557	0.0714034
-0.282155	-0.0956707	0.0220068	0.189971	0.246508	0.196995	-0.0404108	0.287475	-0.216497	0.0304998	0.580639	0.33756		0.104743	0.0715849
-0.278	-0.0924027	0.022548	0.193024	0.251649	0.194899	-0.0401339	0.29425	-0.219239	0.0349868	0.584321	0.336626		0.106877	0.0717772
-0.273448	-0.089391	0.0229249	0.195838	0.256627	0.192663	-0.0399241	0.300971	-0.221956	0.0394993	0.587995	0.335791		0.108966	0.0719655
-0.268771	-0.0868007	0.0231391	0.198458	0.261504	0.190455	-0.039605	0.307721	-0.224645	0.044079	0.591704	0.334858		0.111008	0.072163
-0.263914	-0.0847253	0.0233253	0.200934	0.266324	0.188238	-0.0392356	0.314471	-0.2273	0.0486001	0.595667	0.333824		0.113017	0.0723811
-0.258643	-0.083249	0.023631	0.203426	0.271162	0.185945	-0.0389963	0.32115	-0.229922	0.0531104	0.599846	0.332765		0.115019	0.0726141
-0.25319	-0.0821479	0.0240114	0.205881	0.276003	0.18372	-0.0389083	0.327746	-0.232438	0.0576195	0.604087	0.3316		0.116999	0.0728553
-0.247871	-0.0809174	0.0245771	0.208418	0.280733	0.181566	-0.0389207	0.334256	-0.234804	0.0619795	0.608357	0.330561		0.118995	0.0731062
-0.24275	-0.0794757	0.0254249	0.211165	0.285399	0.179555	-0.0388124	0.340712	-0.237072	0.0660015	0.61272	0.32971		0.121048	0.0733726
-0.237603	-0.0778887	0.0264253	0.214073	0.289935	0.177618	-0.0386128	0.347083	-0.23924	0.0697968	0.617265	0.328892		0.123145	0.0736459
-0.232436	-0.0761958	0.0276897	0.217289	0.294473	0.17563	-0.0383357	0.353507	-0.241249	0.0736726	0.621889	0.328107		0.125337	0.073923
-0.227378	-0.074408	0.0293342	0.220774	0.298991	0.173763	-0.0379585	0.359892	-0.243053	0.0775359	0.626444	0.327062		0.127583	0.07419
-0.222233	-0.0726584	0.0313552	0.224526	0.303281	0.171951	-0.0374804	0.366088	-0.244721	0.0813465	0.630884	0.325874		0.129851	0.0744379
-0.217126	-0.0711187	0.0337364	0.228637	0.307473	0.170134	-0.0368978	0.372078	-0.246169	0.0851257	0.635169	0.324821		0.132155	0.0746769
-0.212075	-0.069614	0.0363998	0.232927	0.31138	0.168269	-0.0363663	0.377848	-0.24742	0.0887688	0.639322	0.323949		0.134449	0.0749049
-0.206869	-0.0677095	0.0392253	0.237268	0.315111	0.166224	-0.0357059	0.383536	-0.248645	0.0923998	0.643349	0.323219		0.136784	0.0751124
-0.201612	-0.0651949	0.0420078	0.241735	0.318802	0.164116	-0.0347829	0.389188	-0.249747	0.0960349	0.647058	0.322565		0.139181	0.0752882
-0.196201	-0.0623927	0.0447812	0.246322	0.322284	0.161896	-0.0337163	0.39476	-0.250791	0.0995983	0.650465	0.322108		0.141593	0.0754386
-0.190544	-0.0595856	0.047525	0.250907	0.325734	0.159483	-0.0323882	0.40021	-0.251916	0.103164	0.653699	0.321796		0.144007	0.075576
-0.184757	-0.0568534	0.0501637	0.255488	0.329084	0.156886	-0.0308414	0.405569	-0.252951	0.106729	0.656632	0.32156		0.146392	0.0756926
-0.178958	-0.0543281	0.0528646	0.260037	0.332318	0.154048	-0.029224	0.410764	-0.253805	0.110332	0.659291	0.321396		0.148728	0.0757912
-0.173067	-0.0518863	0.0555079	0.26441	0.335413	0.15111	-0.0275047	0.415794	-0.254551	0.113952	0.661763	0.321645		0.151049	0.0758784
-0.167082	-0.0492977	0.0579737	0.268599	0.338398	0.14804	-0.0257732	0.42068	-0.255236	0.117479	0.66407	0.322385		0.153353	0.0759575
-0.161213	-0.0465382	0.0603179	0.272608	0.34144	0.1446	-0.0239661	0.42543	-0.256021	0.120969	0.666253	0.323168		0.155587	0.0760376
-0.155346	-0.0436505	0.0624913	0.276479	0.344481	0.140818	-0.0219413	0.430264	-0.257029	0.124452	0.66827	0.324054		0.157779	0.0761233
-0.149534	-0.0405379	0.0646031	0.280326	0.347619	0.136982	-0.0198453	0.43504	-0.258042	0.127943	0.670063	0.325117		0.159978	0.0762046
-0.143839	-0.0372643	0.0667148	0.284083	0.350604	0.133196	-0.0177943	0.439675	-0.258995	0.131424	0.671586	0.326279		0.162139	0.0762717
-0.138216	-0.0341466	0.0687967	0.287664	0.353349	0.129357	-0.0158078	0.44419	-0.260011	0.134818	0.672977	0.327454		0.164202	0.0763393
-0.132706	-0.0312965	0.0708691	0.291141	0.356008	0.125547	-0.0138341	0.448509	-0.260913	0.138141	0.674475	0.328653		0.166216	0.0764152
-0.127139	-0.0286513	0.072954	0.294557	0.358522	0.121905	-0.0119018	0.452688	-0.261675	0.141285	0.676262	0.32995		0.16823	0.0765029
-0.121613	-0.0260259	0.075147	0.297878	0.36116	0.118398	-0.0101336	0.456629	-0.262445	0.144252	0.678252	0.33133		0.170236	0.0766062
-0.116291	-0.0232957	0.077407	0.301147	0.36392	0.114919	-0.0084568	0.46047	-0.263199	0.147142	0.680175	0.332894		0.172236	0.0767174
-0.111162	-0.0205559	0.0797426	0.304391	0.366657	0.111392	-0.00672124	0.464243	-0.263933	0.149928	0.6821	0.334439		0.17421	0.0768343
-0.106076	-0.0178507	0.0821688	0.307549	0.369316	0.1079	-0.00477752	0.46799	-0.264511	0.152684	0.684037	0.335964		0.1762	0.0769438
-0.100943	-0.0152185	0.0845915	0.310686	0.371778	0.104682	-0.00267322	0.471738	-0.264751	0.155352	0.685791	0.337594		0.178219	0.0770274
-0.0960142	-0.0125527	0.0870406	0.313846	0.374128	0.10169	-0.000496742	0.475219	-0.264807	0.157927	0.68746	0.339124		0.180214	0.0770942
-0.0913338	-0.00974359	0.0894274	0.316965	0.376385	0.0986635	0.00181981	0.478564	-0.264811	0.160502	0.689187	0.340538		0.18218	0.0771599
-0.0868417	-0.00685939	0.0917621	0.320024	0.378701	0.0955824	0.00438137	0.481768	-0.264626	0.163051	0.690965	0.341972		0.184157	0.0772207
-0.0824763	-0.00384814	0.0941988	0.32308	0.380951	0.0923744	0.00716503	0.484779	-0.264275	0.165618	0.692752	0.343632		0.186163	0.0772722
-0.078113	-0.000706106	0.096736	0.326164	0.382908	0.0889362	0.0100345	0.487772	-0.26384	0.168208	0.69433	0.345522		0.188163	0.0773087
-0.0738524	0.00250831	0.0992627	0.329143	0.384736	0.0852252	0.0131549	0.490862	-0.263188	0.17106	0.695468	0.347565		0.190162	0.0773187
-0.0697109	0.00561096	0.101609	0.332005	0.386258	0.0811776	0.0165424	0.494015	-0.262323	0.174083	0.696287	0.349819		0.192114	0.0773111
-0.0655004	0.0084774	0.103803	0.334765	0.387448	0.0770761	0.0201179	0.496944	-0.261416	0.176944	0.696995	0.352227		0.19399	0.0772906
-0.0611887	0.0111193	0.105885	0.337489	0.388449	0.0730363	0.0238791	0.499725	-0.260455	0.179966	0.697497	0.354707		0.195842	0.0772537
-0.05713	0.0134458	0.1078	0.340242	0.389325	0.0689047	0.0276674	0.502393	-0.259487	0.183191	0.697869	0.357396		0.197635	0.0772269
-0.05343	0.0155089	0.109616	0.342848	0.390259	0.0647519	0.0314034	0.504962	-0.258559	0.18656	0.698342	0.360438		0.199392	0.0772291
-0.0496745	0.0173217	0.111367	0.345373	0.391106	0.0605534	0.0349228	0.507619	-0.257473	0.190129	0.698756	0.363547		0.201129	0.077235
-0.0457564	0.0187378	0.113105	0.347907	0.391865	0.0563588	0.0383161	0.510275	-0.256284	0.193759	0.699046	0.366734		0.202839	0.0772404
-0.0417746	0.0196427	0.114778	0.350501	0.392569	0.0522967	0.0416277	0.512966	-0.255043	0.197501	0.699262	0.370042		0.204531	0.0772553
-0.0378479	0.0201561	0.116318	0.353249	0.39334	0.0484086	0.0449027	0.51563	-0.253704	0.201378	0.699369	0.373167		0.206197	0.0772729
-0.0341381	0.0204118	0.117844	0.356012	0.394407	0.044633	0.0483592	0.518203	-0.252354	0.205448	0.699479	0.376288		0.207883	0.0773034
-0.0305529	0.0202535	0.11934	0.358795	0.39549	0.0408303	0.0517721	0.520628	-0.251003	0.209476	0.699492	0.379534		0.209505	0.0773444
-0.0270085	0.0197154	0.120758	0.361645	0.396608	0.0370964	0.0552358	0.522837	-0.249728	0.213366	0.699408	0.382812		0.211062	0.0773917
-0.0235084	0.0190379	0.122005	0.364537	0.397837	0.0333417	0.0588711	0.525082	-0.248409	0.217345	0.699311	0.386037		0.212624	0.0774474
-0.0199748	0.0181696	0.123155	0.367413	0.399067	0.0294819	0.0624914	0.527293	-0.247034	0.221132	0.699125	0.38909		0.214117	0.0775032
-0.0162813	0.0170628	0.124411	0.370263	0.400282	0.0256213	0.066083	0.529313	-0.24567	0.224696	0.69887	0.391964		0.215551	0.0775525
-0.0123523	0.0160536	0.125706	0.373221	0.401355	0.0216762	0.0697953	0.531127	-0.244213	0.228228	0.698472	0.394598		0.216972	0.0775771
-0.00828577	0.0151289	0.127074	0.376152	0.402379	0.0177595	0.0738956	0.532829	-0.242719	0.231795	0.697949	0.39729		0.218437	0.0775848
-0.00421027	0.0141107	0.128458	0.378994	0.403402	0.013941	0.0782509	0.53456	-0.241084	0.235507	0.697217	0.400088		0.219936	0.07758
-0.000102629	0.0131655	0.129826	0.38177	0.404353	0.010047	0.0826638	0.536189	-0.23937	0.239226	0.696212	0.402841		0.221402	0.0775576
0.00409949	0.0122367	0.13129	0.384344	0.405242	0.00608613	0.0871105	0.537904	-0.237743	0.242779	0.695036	0.405898		0.222857	0.0775389
0.00852816	0.0112314	0.132808	0.386864	0.406008	0.00229479	0.0916593	0.539807	-0.23616	0.246055	0.693629	0.40908		0.224317	0.0775137
0.0132508	0.0102749	0.134379	0.389389	0.406384	-0.00121807	0.0963117	0.541788	-0.234729	0.249247	0.692249	0.412105		0.225786	0.0774807
0.0181672	0.00943444	0.136031	0.391864	0.406303	-0.00462701	0.100804	0.543986	-0.233359	0.252553	0.69093	0.415055		0.227262	0.0774492
0.0231441	0.00853466	0.137904	0.394307	0.406096	-0.00796091	0.105173	0.546213	-0.231911	0.2558	0.689468	0.418198		0.228747	0.0774137
0.0280976	0.00763626	0.139898	0.396593	0.40585	-0.0111997	0.109636	0.54839	-0.230434	0.2592	0.688041	0.421906		0.230301	0.0773874
0.0331352	0.00689393	0.141852	0.398729	0.40563	-0.0143585	0.11421	0.550699	-0.229	0.263062	0.686658	0.425892		0.23195	0.0773727
0.0381274	0.00613045	0.14385	0.40077	0.405473	-0.0173469	0.118667	0.553066	-0.227641	0.267156	0.685319	0.429936		0.233626	0.0773717
0.043036	0.0054645	0.145938	0.402779	0.405242	-0.0204005	0.12292	0.555337	-0.226362	0.27128	0.684063	0.433947		0.23527	0.0773822
0.0479367	0.00482077	0.148149	0.404682	0.404908	-0.0235208	0.127005	0.557362	-0.225286	0.275385	0.682913	0.437821		0.236848	0.0774013
0.0526339	0.00398259	0.150489	0.406362	0.404537	-0.0264188	0.130953	0.559332	-0.224424	0.279658	0.681919	0.44169		0.238393	0.0774409
0.0572786	0.00323522	0.152934	0.407962	0.40412	-0.0292415	0.134898	0.561396	-0.223777	0.284365	0.681116	0.445166		0.239954	0.0774957
0.0618161	0.00266899	0.155325	0.409506	0.403637	-0.0321959	0.138694	0.563343	-0.223406	0.289369	0.680544	0.448132		0.241453	0.0775679
0.0661443	0.00220838	0.157779	0.411029	0.403437	-0.03534	0.142509	0.565143	-0.223223	0.294602	0.679942	0.450951		0.242932	0.0776565
0.070416	0.00193093	0.160402	0.412462	0.403555	-0.038442	0.146439	0.566703	-0.223178	0.299871	0.679347	0.453606		0.244426	0.0777438
0.0747132	0.00188802	0.163188	0.41386	0.403714	-0.041591	0.150416	0.568207	-0.22339	0.30524	0.678784	0.455932		0.245913	0.0778358
0.078879	0.00196125	0.166107	0.415413	0.403923	-0.044768	0.154323	0.569747	-0.223881	0.31056	0.678065	0.457756		0.24734	0.0779338
0.0827686	0.00216006	0.169046	0.417076	0.404086	-0.0478359	0.158054	0.571205	-0.224544	0.315568	0.677264	0.459208		0.248671	0.078031
0.0865738	0.00257844	0.172121	0.418853	0.40417	-0.0511033	0.162078	0.572881	-0.2254	0.320663	0.676282	0.460535		0.250019	0.0781391
0.0900074	0.00302973	0.174961	0.420495	0.404261	-0.0541217	0.166091	0.574642	-0.226333	0.325446	0.675256	0.461711		0.251287	0.0782498
0.0936225	0.00372661	0.177925	0.422275	0.404385	-0.0573345	0.170522	0.576727	-0.227378	0.330373	0.674107	0.462875		0.252652	0.0783727
0.0972119	0.00454942	0.180807	0.424141	0.404511	-0.0606623	0.174993	0.578855	-0.228473	0.335054	0.672953	0.463839		0.253982	0.0785018
0.100574	0.00531119	0.183511	0.425985	0.404605	-0.0639096	0.179358	0.580703	-0.229461	0.339286	0.671698	0.464794		0.255204	0.078619
0.104549	0.00636752	0.186871	0.428204	0.40473	-0.0677655	0.184619	0.582885	-0.230461	0.344184	0.669919	0.466154		0.256688	0.0787444
0.107006	0.00708661	0.188991	0.429574	0.404819	-0.0701214	0.187857	0.584276	-0.231047	0.347181	0.668773	0.467023		0.257618	0.0788216

## Sheet: noise both 10 y
fly1	fly2	fly3	fly4	fly5	fly6	fly7	fly8	fly9	fly10	fly11	fly12		Avg	SEM
8.48283e-07	6.95922e-07	1.64314e-07	-4.9986e-08	-1.29702e-07	0.0001325	3.59384e-09	-2.5383e-07	0.000106366	0.000106291	0.000102872	-1.76327e-07		3.74275e-05	1.60354e-05
-1.62677e-07	-6.58426e-07	-1.79723e-08	1.52422e-07	4.22842e-07	0.000322825	-8.62113e-07	2.06791e-08	0.000200344	0.000199536	0.000225114	1.18754e-07		7.89027e-05	3.48306e-05
-7.41508e-07	3.89767e-07	-1.41517e-07	-1.94505e-07	-6.90885e-07	0.000474189	6.14474e-07	4.71031e-07	0.000278074	0.000279174	0.000384174	2.18898e-07		0.000117961	5.22763e-05
2.57809e-06	8.44811e-08	3.64577e-07	-3.43963e-07	8.56466e-07	0.000639142	-2.07302e-06	-7.78497e-07	0.000353517	0.000350494	0.000527375	-7.16254e-07		0.000155875	6.97884e-05
-3.64603e-06	-6.20302e-07	-3.63975e-07	-6.87845e-07	-7.556e-07	0.000822628	1.04062e-06	5.30296e-07	0.000386166	0.000416086	0.000603834	-1.49343e-07		0.000185339	8.48973e-05
3.88136e-06	1.28841e-06	5.86478e-07	-2.3289e-06	4.25235e-07	0.00100695	-4.32144e-06	-2.91717e-06	0.000382526	0.000463841	0.000662406	-3.24773e-06		0.000209091	9.88432e-05
-6.27784e-06	-2.31995e-06	-1.54954e-06	-2.7984e-06	3.85359e-07	0.00120163	1.21742e-05	-3.16049e-06	0.000384986	0.000468009	0.000713757	-3.91111e-06		0.000230077	0.000113004
1.17507e-06	2.00587e-06	-2.00283e-06	-8.69258e-06	-1.23147e-06	0.00139837	7.4184e-05	-7.70895e-06	0.000381034	0.000465129	0.000791678	-9.46528e-06		0.00025704	0.000127821
-1.43853e-05	-2.7055e-06	-5.18942e-06	7.29628e-06	8.51407e-07	0.0016595	0.00013662	-1.38901e-05	0.000383802	0.000466118	0.000885729	-1.13162e-05		0.000291036	0.000148372
-9.10902e-05	4.26042e-07	-1.00745e-05	9.40502e-05	-5.20818e-06	0.00199359	0.000199144	1.96252e-06	0.000370143	0.000465629	0.00101108	4.77082e-05		0.00033978	0.000174606
-4.23619e-05	-3.00493e-06	-1.30418e-05	0.000247889	-2.45665e-06	0.0023466	0.000269596	0.000113628	0.000312476	0.000512716	0.00127555	0.00023571		0.000437775	0.000202239
0.000138053	-7.41652e-06	7.52109e-07	0.000521128	-1.11007e-05	0.00266803	0.000449318	0.000462802	0.000261629	0.000566955	0.00176396	0.000632608		0.00062056	0.000232017
0.000444179	7.29145e-05	0.000185494	0.00105722	-1.34613e-05	0.00306193	0.000790095	0.00110933	0.000259431	0.000633986	0.00263628	0.00134974		0.000965595	0.000283881
0.000959764	0.000136405	0.000663601	0.00192086	2.92801e-05	0.00358167	0.0012679	0.00217506	0.000372127	0.000802078	0.00400553	0.00252358		0.00153649	0.000380415
0.00199159	0.000169807	0.00146061	0.0031634	0.000224202	0.00423015	0.00192927	0.00376088	0.000660401	0.00104572	0.00604252	0.00417571		0.00240452	0.000536854
0.00383576	0.000316428	0.00270726	0.00490809	0.000728736	0.00506492	0.0028233	0.00595119	0.00112955	0.00146975	0.00888317	0.00636138		0.00368163	0.000758613
0.00642975	0.000761812	0.00454541	0.00721739	0.0014897	0.00607568	0.00421673	0.00897773	0.00185559	0.00227949	0.0124909	0.00928901		0.0054691	0.0010452
0.00994789	0.00168416	0.00704053	0.0101497	0.00262371	0.00745258	0.0061729	0.0129276	0.0031174	0.00355759	0.0170503	0.013004		0.00789403	0.00139381
0.0143899	0.00302918	0.0102913	0.0138453	0.004269	0.00926531	0.00855995	0.0179011	0.0051406	0.00536236	0.0227079	0.0174656		0.011019	0.00180594
0.0197935	0.00488114	0.0144372	0.0183871	0.00646072	0.0114276	0.0115041	0.0240369	0.0078969	0.00780002	0.0295212	0.0228253		0.0149143	0.00228803
0.0263739	0.00744786	0.0195202	0.0237998	0.00933457	0.0140081	0.0150502	0.0315235	0.0114705	0.0110465	0.0376316	0.0292393		0.0197038	0.00284431
0.0338119	0.0108023	0.0255974	0.0301815	0.012893	0.0171299	0.0192762	0.0404499	0.016034	0.0152296	0.0470611	0.0366963		0.0254303	0.00346359
0.042143	0.0150234	0.0328097	0.0376475	0.0173307	0.02082	0.0241893	0.0506377	0.0216712	0.0204841	0.0577438	0.045142		0.0321369	0.0041256
0.0517308	0.0201978	0.0411066	0.0461495	0.022724	0.0249756	0.0296908	0.0620667	0.0285787	0.0269353	0.0696092	0.0544146		0.0398483	0.00482381
0.0624776	0.0264381	0.0504267	0.0556103	0.0290328	0.0296897	0.0358129	0.0746675	0.0369171	0.0346338	0.0825948	0.0645352		0.0485697	0.00554651
0.0740087	0.0338951	0.0608443	0.0661482	0.036224	0.0349579	0.0425432	0.0884472	0.0467317	0.0436862	0.0966256	0.0756556		0.058314	0.00628684
0.0860999	0.0426709	0.072222	0.0778434	0.0441236	0.0407392	0.0498393	0.103467	0.0581947	0.0541488	0.111852	0.087348		0.0690458	0.00704804
0.0987782	0.0525647	0.0844216	0.0906651	0.0529325	0.0471315	0.0574737	0.119707	0.0713671	0.0659485	0.128395	0.0994116		0.080733	0.00784317
0.112012	0.0634362	0.0974313	0.104591	0.0625755	0.0539982	0.0653271	0.137191	0.0858506	0.0790775	0.146063	0.112114		0.0933055	0.00869504
0.125855	0.0756546	0.111125	0.119519	0.0728869	0.0612445	0.0735077	0.155771	0.101564	0.0936941	0.164725	0.125299		0.106737	0.00959094
0.140398	0.0891624	0.125481	0.135336	0.0838509	0.0689039	0.0818922	0.175465	0.118797	0.109795	0.184329	0.138684		0.121008	0.0105382
0.155509	0.103737	0.140565	0.152052	0.0953639	0.0769791	0.0903994	0.196114	0.137481	0.127264	0.204874	0.152143		0.13604	0.0115505
0.171281	0.119838	0.15634	0.169713	0.107578	0.0854402	0.098982	0.217662	0.157683	0.146025	0.226421	0.165891		0.151904	0.0126323
0.187736	0.137388	0.172748	0.188044	0.12037	0.0943691	0.107507	0.240343	0.179293	0.165868	0.249044	0.180432		0.168595	0.0138127
0.204525	0.156249	0.189777	0.20678	0.133717	0.103845	0.116024	0.264167	0.201978	0.186747	0.27286	0.195791		0.186038	0.0150908
0.221802	0.176602	0.207355	0.226034	0.147647	0.113738	0.124575	0.289186	0.225623	0.208872	0.298052	0.211573		0.204255	0.0164791
0.239707	0.197995	0.225463	0.245739	0.162118	0.123985	0.133199	0.315078	0.250038	0.23242	0.324716	0.227804		0.223189	0.0179792
0.258225	0.220476	0.244265	0.265816	0.177277	0.134613	0.141927	0.341751	0.27514	0.257326	0.352705	0.244985		0.242875	0.0195737
0.277479	0.244369	0.263802	0.286449	0.19293	0.145704	0.150685	0.369168	0.300874	0.283546	0.382007	0.263288		0.263358	0.021263
0.297287	0.269635	0.284164	0.307741	0.208981	0.15726	0.159511	0.39716	0.327526	0.311184	0.412599	0.282437		0.284624	0.0230462
0.317595	0.296206	0.305504	0.329661	0.225493	0.169263	0.168495	0.425983	0.355312	0.339949	0.444363	0.30249		0.306693	0.0249253
0.338305	0.323967	0.327756	0.352256	0.242487	0.181828	0.17783	0.455345	0.383959	0.369618	0.477475	0.324009		0.32957	0.0268766
0.359498	0.352316	0.350883	0.375409	0.259953	0.194869	0.187593	0.485134	0.413454	0.400339	0.511867	0.346928		0.353187	0.028894
0.381045	0.38057	0.374876	0.398857	0.277863	0.208281	0.197714	0.515566	0.443602	0.43233	0.547296	0.370539		0.377378	0.0309799
0.402555	0.409313	0.399706	0.422849	0.296225	0.22208	0.208385	0.546727	0.474313	0.465657	0.583651	0.394294		0.402146	0.0331232
0.424158	0.438761	0.425424	0.447729	0.314967	0.236182	0.219613	0.578714	0.505814	0.500057	0.620482	0.41779		0.427474	0.0353161
0.44547	0.46859	0.45214	0.473523	0.334235	0.250544	0.231302	0.61149	0.538271	0.535484	0.657517	0.441143		0.453309	0.0375505
0.466425	0.499088	0.479868	0.500187	0.353985	0.265237	0.243427	0.645378	0.571951	0.571979	0.694809	0.464753		0.479757	0.0398449
0.487167	0.530517	0.508451	0.527541	0.374031	0.280263	0.255965	0.680156	0.606767	0.609574	0.732435	0.489114		0.506832	0.0422006
0.507494	0.563227	0.537872	0.555477	0.394554	0.295404	0.269052	0.715567	0.642588	0.64814	0.770496	0.514198		0.534506	0.0446119
0.527542	0.596964	0.568226	0.584067	0.415725	0.310601	0.282673	0.75202	0.679172	0.68726	0.808817	0.53937		0.562703	0.0470742
0.547384	0.631055	0.599217	0.613268	0.437642	0.326047	0.296794	0.789457	0.716279	0.727028	0.847223	0.564617		0.591334	0.0495644
0.567582	0.665695	0.630663	0.643063	0.460329	0.341693	0.311231	0.827816	0.75402	0.767858	0.885529	0.589383		0.620405	0.0520941
0.588153	0.702144	0.66266	0.673795	0.483786	0.357572	0.325936	0.867033	0.791889	0.809803	0.92377	0.613316		0.649988	0.0546683
0.60913	0.740674	0.695124	0.705687	0.50797	0.373791	0.341176	0.906784	0.829516	0.852476	0.962292	0.636793		0.680118	0.0572635
0.630912	0.780039	0.72811	0.738629	0.532831	0.39016	0.356878	0.946951	0.867204	0.89582	1.00137	0.660047		0.710746	0.0598902
0.652916	0.819865	0.761579	0.772485	0.558415	0.406706	0.373108	0.987466	0.905078	0.939985	1.04118	0.684018		0.7419	0.062549
0.675212	0.860297	0.79543	0.807066	0.58461	0.423591	0.390001	1.02829	0.943221	0.984882	1.08144	0.708338		0.773532	0.0652192
0.697991	0.901502	0.829527	0.842256	0.611384	0.44073	0.407526	1.06933	0.98161	1.03054	1.12205	0.732603		0.805587	0.0679017
0.72151	0.943552	0.863969	0.878072	0.638795	0.458062	0.425823	1.11037	1.02027	1.07655	1.16282	0.756693		0.838041	0.0705686
0.746221	0.986189	0.899004	0.914477	0.666907	0.475663	0.444805	1.15177	1.05903	1.12296	1.20331	0.779954		0.870857	0.0732102
0.771848	1.02984	0.934386	0.951154	0.695694	0.493503	0.464352	1.19372	1.09751	1.17022	1.24395	0.803896		0.904173	0.0758528
0.798205	1.07509	0.97044	0.988085	0.724991	0.51145	0.484562	1.23591	1.13598	1.21816	1.28522	0.82897		0.938089	0.0785142
0.824813	1.12155	1.00731	1.02535	0.754759	0.529464	0.505434	1.27889	1.17481	1.26677	1.32713	0.854803		0.972591	0.0812261
0.851752	1.16811	1.04474	1.06255	0.78484	0.547525	0.526886	1.32272	1.21431	1.31593	1.36939	0.882145		1.00757	0.0839623
0.879114	1.21491	1.08293	1.09998	0.815394	0.565662	0.548836	1.36657	1.2547	1.36582	1.41155	0.910787		1.04302	0.0866962
0.906676	1.26292	1.12183	1.13804	0.846342	0.583901	0.571419	1.4106	1.29597	1.41657	1.45341	0.940476		1.07901	0.0894465
0.935169	1.31234	1.16144	1.17638	0.877416	0.602214	0.594795	1.45494	1.33753	1.46768	1.49497	0.970856		1.11548	0.0921883
0.964693	1.36322	1.20178	1.21505	0.909162	0.620632	0.618757	1.49943	1.37861	1.51907	1.53648	1.00198		1.15241	0.0949062
0.994886	1.41532	1.24294	1.25452	0.941703	0.639069	0.643122	1.54443	1.41939	1.57094	1.5779	1.03385		1.18984	0.0976332
1.02538	1.46807	1.28476	1.29492	0.974964	0.657463	0.667707	1.59033	1.46004	1.62356	1.61936	1.06682		1.22778	0.1004
1.05561	1.52047	1.32688	1.33618	1.00886	0.676015	0.692585	1.63686	1.50078	1.67669	1.66122	1.10126		1.26612	0.103181
1.08551	1.5721	1.36945	1.37841	1.04314	0.694965	0.718147	1.68345	1.54204	1.7302	1.70332	1.13516		1.30466	0.105955
1.11514	1.62368	1.41225	1.42178	1.07796	0.714268	0.744422	1.72992	1.5831	1.78436	1.74497	1.16831		1.34335	0.108704
1.14463	1.67521	1.45547	1.4661	1.11352	0.733815	0.771594	1.77591	1.62342	1.83871	1.78577	1.20177		1.38216	0.111367
1.17401	1.7274	1.49911	1.5112	1.14989	0.753629	0.799684	1.82189	1.66344	1.89332	1.82649	1.23502		1.42126	0.114005
1.20341	1.78043	1.54268	1.55676	1.18673	0.773576	0.82853	1.86861	1.70328	1.94826	1.86752	1.26804		1.46065	0.116671
1.2329	1.83312	1.58607	1.60261	1.22424	0.793741	0.858057	1.91574	1.74254	2.00338	1.90885	1.30045		1.50014	0.119316
1.2619	1.88565	1.6292	1.64926	1.2626	0.814255	0.887966	1.96308	1.78114	2.05937	1.95068	1.33222		1.53978	0.121986
1.29047	1.93852	1.67245	1.69667	1.30116	0.835014	0.918586	2.01013	1.81971	2.1157	1.99278	1.3637		1.57957	0.124662
1.31902	1.99172	1.71609	1.74423	1.3399	0.856195	0.949974	2.05683	1.85822	2.1713	2.0352	1.3946		1.61944	0.127294
1.34764	2.04478	1.7599	1.79164	1.37903	0.877975	0.981973	2.1036	1.89648	2.22604	2.078	1.42454		1.6593	0.129873
1.37679	2.09809	1.80357	1.83883	1.41858	0.900278	1.01481	2.15022	1.93471	2.28042	2.12102	1.45379		1.69926	0.132394
1.4065	2.15247	1.84702	1.88579	1.45871	0.922943	1.048	2.19695	1.97286	2.33501	2.16416	1.48385		1.73952	0.134902
1.43603	2.20686	1.8901	1.93259	1.49933	0.945991	1.08144	2.24434	2.01115	2.38994	2.2076	1.51465		1.78	0.137416
1.46522	2.26159	1.93282	1.97953	1.54002	0.969417	1.11536	2.29203	2.04944	2.44506	2.25154	1.54515		1.8206	0.13995
1.49433	2.31686	1.97557	2.02673	1.58063	0.99296	1.14979	2.33969	2.08742	2.49976	2.29518	1.57507		1.86117	0.142475
1.52305	2.37135	2.01837	2.07393	1.62133	1.01681	1.18474	2.38734	2.12539	2.55425	2.33818	1.60455		1.90161	0.14495
1.5515	2.42604	2.06163	2.12094	1.66213	1.04122	1.22	2.43445	2.16365	2.60886	2.38071	1.6344		1.94213	0.14739
1.58017	2.48123	2.10539	2.16778	1.70289	1.06601	1.25567	2.4814	2.20246	2.6633	2.42296	1.66464		1.98282	0.149804
1.60867	2.53653	2.14924	2.21461	1.7432	1.09111	1.29157	2.52888	2.24164	2.7183	2.46544	1.69525		2.0237	0.152257
1.63673	2.59207	2.19315	2.2613	1.78323	1.11642	1.32795	2.57629	2.28095	2.77459	2.50802	1.72655		2.06477	0.154748
1.66423	2.64731	2.23721	2.30769	1.82334	1.14178	1.36503	2.62332	2.32043	2.83193	2.55038	1.75814		2.1059	0.157244
1.69101	2.70253	2.28175	2.35415	1.86321	1.16703	1.40225	2.67032	2.35991	2.88991	2.59239	1.79003		2.14704	0.159783
1.71759	2.75786	2.32665	2.4008	1.90299	1.19208	1.43982	2.71729	2.39921	2.94839	2.63416	1.82224		2.18826	0.16235
1.74446	2.8137	2.37186	2.44739	1.9431	1.21705	1.47749	2.76406	2.43832	3.00694	2.67607	1.85428		2.22956	0.164935
1.77146	2.86981	2.41754	2.49373	1.98376	1.24222	1.51492	2.81072	2.47767	3.06578	2.71788	1.8865		2.271	0.167535
1.79819	2.92548	2.46374	2.53993	2.02472	1.26777	1.55236	2.85724	2.51745	3.12553	2.7596	1.92012		2.31268	0.170128
1.8243	2.98189	2.51064	2.58622	2.06573	1.29334	1.59005	2.90392	2.55721	3.18542	2.80157	1.95521		2.35462	0.172752
1.84918	3.03929	2.55791	2.63237	2.10672	1.31879	1.62808	2.95133	2.59685	3.24524	2.84374	1.99058		2.39667	0.175453
1.87313	3.09688	2.60477	2.67805	2.14801	1.34437	1.66603	2.99919	2.63645	3.3057	2.88601	2.02568		2.43869	0.17822
1.89703	3.15407	2.65103	2.72342	2.19036	1.37006	1.70423	3.04742	2.67583	3.36629	2.92845	2.06015		2.4807	0.180982
1.92101	3.21112	2.69746	2.769	2.2333	1.39593	1.74275	3.09616	2.71513	3.42677	2.97086	2.09397		2.52279	0.183748
1.94528	3.26936	2.74449	2.81493	2.27638	1.42212	1.78131	3.14504	2.75442	3.48795	3.01286	2.12783		2.56516	0.186563
1.96972	3.32866	2.79186	2.86109	2.31988	1.44844	1.82053	3.19373	2.79361	3.54952	3.05466	2.16177		2.60779	0.189396
1.99404	3.3884	2.83971	2.90748	2.36366	1.47486	1.86036	3.24219	2.83305	3.61074	3.09666	2.19525		2.65053	0.192232
2.01848	3.44854	2.88808	2.95406	2.40753	1.50137	1.90045	3.29083	2.87274	3.67203	3.13898	2.22857		2.69347	0.1951
2.04262	3.50896	2.93639	3.00086	2.4511	1.52782	1.94059	3.33973	2.91216	3.73349	3.18201	2.26184		2.73646	0.198027
2.06665	3.56987	2.98429	3.04789	2.49493	1.55443	1.98047	3.38817	2.9511	3.79515	3.22595	2.29434		2.77944	0.201005
2.09154	3.63024	3.03191	3.09514	2.53928	1.58166	2.01984	3.43581	2.98972	3.85717	3.27047	2.32647		2.82244	0.203947
2.11755	3.68832	3.07944	3.14271	2.58369	1.60923	2.05861	3.48271	3.02817	3.91919	3.31516	2.35908		2.86532	0.206781
2.14424	3.74457	3.12718	3.19071	2.6281	1.63688	2.09765	3.52912	3.06644	3.981	3.35982	2.3924		2.90818	0.209511
2.17114	3.80055	3.1749	3.23876	2.67228	1.66478	2.13712	3.57526	3.1048	4.0432	3.40425	2.4268		2.95115	0.2122
2.19793	3.85652	3.22198	3.28647	2.71668	1.69289	2.17681	3.6212	3.14323	4.10555	3.44874	2.46221		2.99418	0.214856
2.22455	3.91185	3.26864	3.33407	2.76143	1.72125	2.21695	3.66716	3.18161	4.16686	3.49395	2.49825		3.03722	0.217433
2.25108	3.96602	3.31541	3.38125	2.80641	1.75005	2.25721	3.71348	3.21998	4.22819	3.53978	2.53449		3.08028	0.219971
2.27755	4.01933	3.36237	3.42783	2.85158	1.77919	2.29783	3.75997	3.25801	4.29022	3.58586	2.57044		3.12335	0.222498
2.30414	4.07242	3.40925	3.47397	2.89636	1.80873	2.33917	3.80589	3.29582	4.35221	3.63208	2.60605		3.16634	0.224977
2.33118	4.12481	3.45596	3.51969	2.94129	1.83875	2.38088	3.85165	3.3338	4.41409	3.67822	2.64152		3.20932	0.227384
2.35846	4.1767	3.50319	3.56503	2.98643	1.86891	2.42294	3.89805	3.37182	4.47585	3.72423	2.67656		3.25235	0.229773
2.38588	4.22957	3.55066	3.60994	3.0315	1.89878	2.4656	3.94499	3.40947	4.53815	3.77015	2.71118		3.29549	0.23223
2.41368	4.28439	3.59797	3.65441	3.07709	1.92831	2.50899	3.99245	3.44666	4.60099	3.81607	2.74602		3.33892	0.234755
2.44176	4.34082	3.64607	3.69834	3.1232	1.95774	2.55244	4.04015	3.48379	4.66341	3.86182	2.78077		3.38252	0.237316
2.47006	4.39758	3.69497	3.74189	3.16981	1.98724	2.5954	4.08768	3.52084	4.72546	3.9068	2.81521		3.42608	0.239872
2.49872	4.45412	3.74416	3.7851	3.21658	2.01671	2.63806	4.13504	3.55745	4.78764	3.95089	2.84951		3.4695	0.242416
2.52738	4.51089	3.79336	3.82776	3.26332	2.04593	2.67966	4.18202	3.59366	4.8504	3.99396	2.88355		3.51266	0.245015
2.55595	4.56821	3.8422	3.87012	3.31019	2.07503	2.71947	4.22867	3.62972	4.91311	4.03604	2.91774		3.55554	0.247659
2.58484	4.62504	3.89069	3.91198	3.35697	2.1042	2.75797	4.2753	3.66556	4.97539	4.07771	2.95218		3.59815	0.250279
2.6139	4.68077	3.93923	3.95317	3.40417	2.13346	2.79601	4.32205	3.70113	5.03807	4.11916	2.98671		3.64065	0.25288
2.64304	4.73643	3.98791	3.99377	3.45175	2.16275	2.83447	4.36891	3.73662	5.10081	4.16004	3.02128		3.68315	0.255461
2.67266	4.79175	4.0362	4.03362	3.49894	2.192	2.87332	4.41583	3.77187	5.16289	4.20033	3.05599		3.72545	0.257972
2.70261	4.84595	4.08424	4.07266	3.54605	2.2213	2.91237	4.46276	3.80716	5.22393	4.24061	3.08981		3.76745	0.260401
2.73255	4.89905	4.1322	4.11082	3.59302	2.25082	2.95146	4.50959	3.84278	5.28405	4.2811	3.12217		3.80913	0.262777
2.76253	4.95097	4.17963	4.14793	3.63938	2.28047	2.99021	4.55643	3.87813	5.34409	4.32195	3.15435		3.85051	0.265118
2.79267	5.00149	4.22666	4.18393	3.68544	2.31003	3.02875	4.60349	3.91323	5.40391	4.36344	3.18621		3.8916	0.267425
2.82302	5.05055	4.27337	4.219	3.73159	2.33987	3.06706	4.65026	3.94833	5.46339	4.40537	3.21718		3.93242	0.269672
2.85385	5.09874	4.31974	4.25294	3.77799	2.37014	3.10606	4.69651	3.98293	5.52255	4.44771	3.24757		3.97306	0.271826
2.88507	5.14673	4.36581	4.28558	3.82465	2.40065	3.14664	4.74256	4.01706	5.58088	4.49023	3.27747		4.01361	0.27388
2.91622	5.19497	4.41141	4.31722	3.87154	2.43135	3.18792	4.78847	4.05109	5.63865	4.53258	3.30675		4.05401	0.275897
2.94748	5.24363	4.45658	4.34781	3.91852	2.46195	3.22913	4.8343	4.08507	5.69597	4.57497	3.33493		4.09419	0.27793
2.97905	5.29246	4.50133	4.37721	3.96543	2.49236	3.27028	4.87995	4.11886	5.75321	4.61778	3.36216		4.13417	0.279985
3.01049	5.34098	4.54562	4.40551	4.01236	2.52291	3.31137	4.92541	4.15273	5.81072	4.66101	3.38886		4.174	0.282054
3.04205	5.38803	4.58931	4.43286	4.05934	2.55377	3.35235	4.97084	4.1868	5.86844	4.70409	3.4156		4.21362	0.284067
3.07404	5.43251	4.63234	4.45942	4.10676	2.58491	3.3934	5.01591	4.22041	5.92665	4.7467	3.44298		4.253	0.285967
3.10601	5.47533	4.67478	4.48536	4.1547	2.6162	3.4345	5.06037	4.25369	5.98479	4.78892	3.47077		4.29212	0.287781
3.13822	5.51835	4.71654	4.51071	4.20271	2.6475	3.47524	5.10462	4.28683	6.04253	4.83099	3.49833		4.33105	0.289586
3.17056	5.56222	4.75763	4.53567	4.25077	2.67863	3.51564	5.14924	4.31977	6.10017	4.8733	3.52551		4.36993	0.291448
3.20289	5.60639	4.79776	4.56045	4.29871	2.70944	3.55557	5.19416	4.35298	6.15797	4.91594	3.55247		4.40873	0.29337
3.23554	5.65043	4.83702	4.58495	4.34643	2.74002	3.59476	5.2389	4.38629	6.21615	4.95872	3.57927		4.44737	0.295326
3.26832	5.69423	4.87602	4.60931	4.3942	2.77057	3.63373	5.28353	4.4195	6.27422	5.00145	3.60646		4.48596	0.297271
3.30095	5.7371	4.91489	4.63371	4.44205	2.80129	3.67247	5.328	4.45248	6.332	5.04418	3.63427		4.52445	0.299171
3.33352	5.77879	4.95352	4.65823	4.49005	2.83222	3.71066	5.37209	4.48497	6.38957	5.08669	3.66258		4.56274	0.301019
3.36634	5.81996	4.99172	4.68285	4.53859	2.86331	3.74872	5.41602	4.51701	6.4466	5.12905	3.69145		4.60097	0.302804
3.39895	5.86226	5.02973	4.7074	4.58744	2.89459	3.78655	5.45961	4.5488	6.50324	5.17152	3.72041		4.63921	0.304612
3.43137	5.90739	5.06772	4.732	4.63595	2.92575	3.82417	5.50333	4.581	6.55958	5.21364	3.74866		4.67755	0.306532
3.46413	5.95388	5.10543	4.75658	4.6844	2.95672	3.86203	5.54737	4.61351	6.61575	5.25531	3.77592		4.71592	0.308509
3.49683	5.99991	5.14302	4.78105	4.73302	2.98782	3.90032	5.59073	4.64561	6.67189	5.29678	3.80304		4.75417	0.310456
3.52968	6.04514	5.1807	4.80551	4.78142	3.01913	3.93908	5.63353	4.67764	6.72774	5.33781	3.82994		4.79228	0.312341
3.56272	6.08906	5.21832	4.82997	4.82939	3.05065	3.97827	5.67629	4.7098	6.78318	5.37826	3.85554		4.83012	0.314176
3.59572	6.13102	5.25582	4.85469	4.8769	3.08235	4.01786	5.71875	4.74195	6.83831	5.41838	3.87974		4.86762	0.315955
3.62905	6.17074	5.293	4.87948	4.92409	3.11405	4.05758	5.76076	4.7742	6.89319	5.45803	3.90311		4.90477	0.317653
3.66269	6.20965	5.32965	4.90409	4.97132	3.1457	4.09733	5.80253	4.80654	6.94773	5.49721	3.92594		4.9417	0.319312
3.69641	6.24856	5.36599	4.92857	5.01869	3.17742	4.13744	5.84401	4.83902	7.00197	5.53659	3.94784		4.97854	0.320972
3.73012	6.28706	5.40236	4.95291	5.06595	3.20917	4.17777	5.88539	4.87166	7.05626	5.57587	3.96924		5.01531	0.322638
3.76398	6.32461	5.43864	4.97729	5.11328	3.24087	4.21844	5.92714	4.90434	7.11058	5.61499	3.99057		5.05206	0.324287
3.79776	6.36054	5.4747	5.00168	5.1608	3.27278	4.25951	5.96874	4.93677	7.16434	5.6546	4.01131		5.08863	0.325877
3.83089	6.39642	5.51071	5.02617	5.2077	3.30512	4.30074	6.01019	4.96894	7.2174	5.69417	4.03153		5.125	0.327452
3.86326	6.43301	5.54655	5.05065	5.25397	3.33767	4.34208	6.05239	5.0009	7.2701	5.73374	4.05121		5.16129	0.329082
3.89513	6.46991	5.58202	5.07467	5.30038	3.37022	4.38338	6.09506	5.03222	7.32247	5.77374	4.07037		5.19747	0.330763
3.92696	6.50788	5.6174	5.0985	5.34708	3.40279	4.42455	6.13784	5.06297	7.37492	5.81381	4.0896		5.23369	0.3325
3.95875	6.54663	5.6526	5.12233	5.39392	3.4353	4.46572	6.18099	5.09362	7.42756	5.85398	4.10897		5.27003	0.334288
3.99047	6.58598	5.6876	5.14623	5.44102	3.46783	4.50722	6.22451	5.12429	7.48015	5.89452	4.12817		5.3065	0.336115
4.02229	6.62559	5.72262	5.17039	5.48805	3.50051	4.54917	6.26816	5.15508	7.53255	5.93544	4.14703		5.34307	0.337952
4.05406	6.66452	5.75753	5.19473	5.53459	3.53279	4.59107	6.31168	5.18594	7.58478	5.97634	4.16574		5.37948	0.339789
4.08559	6.70351	5.79219	5.21919	5.58077	3.56446	4.63272	6.35449	5.21692	7.63724	6.01727	4.18406		5.4157	0.341679
4.11673	6.74318	5.82652	5.24376	5.62631	3.59584	4.67432	6.39633	5.24813	7.68966	6.0584	4.20229		5.45179	0.343601
4.1477	6.78288	5.86072	5.26842	5.67108	3.62692	4.7157	6.43764	5.27969	7.7419	6.09978	4.22129		5.48781	0.345512
4.17921	6.82224	5.89484	5.29327	5.71574	3.65765	4.7569	6.47859	5.31161	7.7941	6.14176	4.24034		5.52385	0.347417
4.21147	6.86134	5.9288	5.31855	5.76048	3.6877	4.79799	6.51896	5.34391	7.84638	6.18343	4.25935		5.55986	0.349316
4.24383	6.90026	5.96275	5.34454	5.80493	3.71712	4.83879	6.55909	5.37702	7.8991	6.22427	4.27858		5.59586	0.351237
4.27586	6.93854	5.99677	5.371	5.84951	3.74662	4.87983	6.59956	5.4107	7.95178	6.2649	4.29763		5.63189	0.353154
4.30763	6.97565	6.0308	5.39768	5.89442	3.77639	4.9212	6.64027	5.44456	8.00433	6.30535	4.31691		5.66793	0.355026
4.3392	7.01167	6.06457	5.42467	5.93934	3.80622	4.96258	6.68117	5.47846	8.05719	6.34572	4.33673		5.70396	0.356879
4.37057	7.04756	6.09804	5.45194	5.98419	3.83613	5.00379	6.72246	5.51226	8.10999	6.38598	4.35721		5.74001	0.358721
4.40177	7.08369	6.13121	5.4795	6.02884	3.8666	5.0446	6.764	5.54649	8.16263	6.42578	4.378		5.77609	0.360541
4.43276	7.11898	6.16423	5.50734	6.07351	3.89781	5.08497	6.80583	5.58111	8.21524	6.46487	4.39853		5.8121	0.362328
4.46343	7.15403	6.19707	5.53552	6.11864	3.92923	5.12457	6.84771	5.61576	8.26784	6.50334	4.41794		5.84792	0.364151
4.49414	7.18982	6.22962	5.56409	6.16489	3.9608	5.1639	6.8895	5.65051	8.32114	6.54147	4.43603		5.88383	0.366069
4.52491	7.22514	6.26218	5.59294	6.21216	3.99274	5.20321	6.93133	5.68552	8.37522	6.57939	4.45413		5.91991	0.368007
4.5555	7.25964	6.29495	5.62205	6.25991	4.02542	5.24258	6.97322	5.72105	8.42914	6.6178	4.47239		5.95614	0.369902
4.58613	7.29375	6.32806	5.65146	6.30806	4.05883	5.28263	7.01511	5.7568	8.48253	6.65719	4.49093		5.99262	0.371735
4.61679	7.32768	6.36152	5.68111	6.35601	4.09201	5.32296	7.05664	5.79263	8.53543	6.69737	4.51036		6.02921	0.373527
4.64744	7.36289	6.3955	5.71105	6.40357	4.125	5.36325	7.09812	5.82856	8.58784	6.73838	4.5302		6.06598	0.375341
4.67781	7.39949	6.42986	5.74101	6.45051	4.15797	5.40323	7.13933	5.86443	8.63944	6.77929	4.54998		6.1027	0.377162
4.70794	7.43636	6.46463	5.77108	6.49727	4.19095	5.44335	7.18048	5.90074	8.69073	6.81977	4.56999		6.13944	0.378971
4.73816	7.4738	6.50004	5.80132	6.54475	4.22394	5.48412	7.22213	5.93733	8.7419	6.86055	4.59059		6.17655	0.380785
4.76845	7.51222	6.53558	5.8315	6.59267	4.25658	5.52541	7.26388	5.97386	8.79251	6.90146	4.61174		6.21382	0.382597
4.79932	7.55107	6.57162	5.86184	6.64077	4.28955	5.56766	7.30644	6.01073	8.84358	6.94265	4.63415		6.25162	0.384389
4.83006	7.58982	6.60804	5.89197	6.68841	4.32241	5.60971	7.34963	6.04733	8.89459	6.98379	4.65779		6.28946	0.386167
4.86038	7.62954	6.64492	5.92205	6.736	4.35534	5.65128	7.39344	6.0839	8.94542	7.02484	4.68198		6.32742	0.387978
4.89054	7.6698	6.68186	5.95158	6.78322	4.38842	5.69229	7.43767	6.1204	8.99631	7.06544	4.70665		6.36535	0.389805
4.9204	7.71015	6.71839	5.98037	6.83015	4.42102	5.73271	7.48205	6.15679	9.04749	7.10556	4.7316		6.40306	0.391678
4.95016	7.75153	6.75495	6.00915	6.87798	4.45395	5.77342	7.52678	6.1935	9.09972	7.14564	4.75623		6.44108	0.393643
4.97947	7.7929	6.79055	6.03747	6.92582	4.4866	5.81334	7.57032	6.22984	9.1519	7.18455	4.78031		6.47859	0.395621
5.00942	7.83522	6.82673	6.06654	6.97508	4.5197	5.85353	7.61418	6.26701	9.20535	7.22375	4.80523		6.51681	0.397643
5.03918	7.87739	6.86264	6.09546	7.0242	4.55248	5.89294	7.65735	6.30371	9.2583	7.26273	4.82997		6.5547	0.399655
5.0689	7.91956	6.89877	6.12476	7.07324	4.5855	5.9326	7.70076	6.3404	9.31142	7.30218	4.85476		6.59274	0.401676
5.09856	7.96184	6.93576	6.15476	7.12177	4.61913	5.97291	7.7449	6.37718	9.36522	7.34213	4.8799		6.63117	0.403713
5.12718	8.00304	6.97215	6.18418	7.16823	4.65206	6.0122	7.78778	6.41277	9.41763	7.38055	4.90434		6.66851	0.405689
5.15717	8.04591	7.01041	6.21548	7.21689	4.68689	6.05388	7.83277	6.45025	9.47194	7.42033	4.92968		6.70763	0.407706
5.18571	8.08615	7.04635	6.24535	7.26332	4.71969	6.09378	7.87527	6.48593	9.52308	7.45817	4.95349		6.74469	0.409597
5.21586	8.12846	7.0844	6.2777	7.31256	4.75409	6.13658	7.92015	6.52363	9.57695	7.49831	4.97827		6.78391	0.411596
5.24534	8.16956	7.12182	6.31002	7.36054	4.78807	6.17845	7.96382	6.56039	9.62924	7.53731	5.00238		6.82225	0.413507
5.27371	8.20824	7.15782	6.34117	7.40575	4.82059	6.21788	8.0054	6.59539	9.67843	7.5743	5.02588		6.85871	0.41525
5.30807	8.25481	7.20226	6.37928	7.45964	4.86021	6.26628	8.05688	6.63783	9.73754	7.61944	5.0544		6.90305	0.417335
5.32921	8.28355	7.2299	6.4029	7.49269	4.88483	6.29655	8.08902	6.66405	9.77403	7.64747	5.07185		6.9305	0.418629
