# Supplementary material for: How spatial release from masking may fail to function in a highly directional auditory system
Source: eLife. 2017 Apr 25;6:e20731. doi: 10.7554/eLife.20731 (PMC5443663; doi:10.7554/eLife.20731)
Supplement: Figure 5—source data 5. — The target signal was presented at 76 dB SPL from a forward speaker while the masker was presented at the same intensity from a lateral speaker to the right. ‘X’ and ‘Y’ coordinates of virtual walking paths measured from the treadmill system. Data plotted in Figure 5E. DOI: http://dx.doi.org/10.7554/eLife.20731.021 [file elife-20731-fig5-data5.xlsx]

## Sheet: noise plus 90 x
fly1	fly2	fly3	fly4	fly5	fly6	fly7	fly8	fly9	fly10	fly11	fly12		Avg	SEM
7.32666e-08	-1.04681e-06	2.27341e-07	-7.6726e-08	-0.000400567	-7.23816e-07	-3.35884e-07	-2.04707e-07	-1.55407e-07	2.26991e-07	-1.91063e-08	1.17528e-06		-3.34522e-05	3.33744e-05
-3.53379e-07	1.33388e-06	-2.93793e-07	1.40119e-07	-0.000485047	4.49456e-07	-2.79237e-08	1.36053e-09	1.60972e-07	-7.88114e-08	2.96668e-07	-6.11566e-06		-4.07946e-05	4.03902e-05
7.86101e-07	-2.18039e-06	2.74219e-07	-1.81543e-07	-0.000469984	-6.84669e-08	4.45516e-07	2.60551e-07	-1.13465e-07	-1.63494e-07	-5.57404e-07	7.98085e-05		-3.26395e-05	4.03091e-05
-1.66343e-07	2.10435e-06	-1.72829e-07	1.69978e-07	-0.000602726	-4.88913e-07	-9.94173e-07	-5.63619e-07	4.64239e-09	4.56174e-07	6.84843e-07	0.000116955		-4.03947e-05	5.20332e-05
2.90765e-06	-1.3504e-06	-9.36705e-08	-1.052e-07	-0.000873885	1.53838e-06	1.88083e-06	6.41349e-07	1.32965e-07	-7.13986e-07	-7.80062e-07	0.000111381		-6.32038e-05	7.42723e-05
2.13731e-06	5.24658e-07	3.24492e-07	-3.25295e-08	-0.00103973	-9.60934e-07	-1.28015e-06	-7.50758e-07	-2.92341e-07	8.29078e-07	1.16192e-06	0.000117418		-7.67209e-05	8.80857e-05
6.47627e-06	3.52829e-05	-7.2915e-07	1.39832e-07	-0.00106571	4.72928e-06	3.0681e-06	1.10208e-06	4.01684e-07	-6.99898e-07	1.82094e-07	8.48077e-05		-7.75788e-05	9.01187e-05
8.45678e-06	5.12614e-05	1.19932e-06	-3.11616e-07	-0.00100686	4.066e-07	5.07089e-07	1.27256e-06	-5.74961e-07	2.54727e-07	3.46963e-07	0.000141779		-6.6855e-05	8.62928e-05
-4.63364e-05	6.06773e-05	1.00102e-06	7.24482e-07	-0.0009081	1.0196e-05	2.53854e-06	3.11087e-06	6.34028e-07	3.96194e-07	1.66851e-06	0.000215161		-5.48607e-05	7.98093e-05
-0.000180218	4.19241e-05	3.91367e-06	7.13118e-08	-0.0009599	-5.19847e-06	4.21347e-06	6.59322e-06	4.42501e-07	-1.14951e-06	-6.05653e-07	0.000224633		-7.21068e-05	8.45585e-05
-0.000470452	-4.55655e-05	6.55614e-06	1.93014e-06	-0.00108557	-9.57656e-05	-7.29873e-05	9.62121e-06	1.08329e-06	1.62768e-06	2.87583e-06	0.000183542		-0.000130259	9.718e-05
-0.000972179	-0.000138578	1.144e-05	2.15222e-06	-0.00123939	-0.000237786	-0.000183225	6.40272e-06	2.97778e-06	-2.26105e-06	-7.33075e-05	8.03677e-05		-0.000228616	0.000122332
-0.00166663	-0.000252585	4.21683e-06	4.65489e-06	-0.00139578	-0.00057971	-0.000333443	-0.000111388	1.77106e-06	3.39662e-06	-0.00019103	-0.000448506		-0.000413753	0.000161262
-0.00269216	-0.000567078	-8.92149e-05	-7.18263e-07	-0.00161728	-0.00110101	-0.000552868	-0.000397864	9.11873e-06	1.48393e-07	-0.000221951	-0.00162787		-0.000738229	0.000246622
-0.00425643	-0.00110757	-0.000387257	-5.70245e-05	-0.00192361	-0.00177018	-0.000795052	-0.000916697	-2.49578e-05	4.87417e-06	-0.000228573	-0.00324121		-0.00122531	0.000392594
-0.00647858	-0.00185908	-0.00101276	-0.000172595	-0.00214298	-0.00279179	-0.00110759	-0.00176284	-0.000155203	8.67567e-06	-0.000318626	-0.00549543		-0.00194073	0.000605108
-0.00944475	-0.00306796	-0.00192363	-0.000385906	-0.00250877	-0.00416364	-0.00160904	-0.00295463	-0.000374036	6.55824e-06	-0.000543179	-0.00847394		-0.00295358	0.000891768
-0.0131204	-0.00476289	-0.00323532	-0.000742873	-0.00312055	-0.00591242	-0.00240224	-0.00465841	-0.00065568	2.15542e-05	-0.000899858	-0.0124088		-0.00432482	0.00125766
-0.0174665	-0.0070661	-0.00512521	-0.00126592	-0.00395309	-0.00816951	-0.00348936	-0.00692634	-0.00104247	-0.000183084	-0.00153733	-0.0175007		-0.00614381	0.0017016
-0.0227209	-0.0101247	-0.0074724	-0.00199039	-0.00505714	-0.0109869	-0.00498824	-0.00974627	-0.00163092	-0.000615508	-0.00255771	-0.0233192		-0.00843419	0.00220956
-0.029008	-0.0138353	-0.0104727	-0.00291005	-0.00639125	-0.0144167	-0.00693965	-0.0132354	-0.00240693	-0.00118889	-0.00391881	-0.0298585		-0.0112152	0.00279038
-0.0361241	-0.0185005	-0.0143416	-0.00403885	-0.00802898	-0.0185876	-0.00931993	-0.0174912	-0.00343652	-0.00210594	-0.00581898	-0.0372794		-0.0145895	0.00343512
-0.0442269	-0.0241334	-0.019035	-0.00542221	-0.0101545	-0.0234646	-0.0123709	-0.0225534	-0.00486527	-0.00338744	-0.00836684	-0.0455976		-0.0186315	0.00414168
-0.0535612	-0.0306209	-0.0246643	-0.00710596	-0.0130281	-0.028922	-0.0161409	-0.0283566	-0.00669857	-0.00499964	-0.0115903	-0.0547393		-0.023369	0.00491086
-0.0638845	-0.0380406	-0.0314114	-0.00910608	-0.0163928	-0.0352243	-0.0206451	-0.0349581	-0.00901841	-0.00694958	-0.0157522	-0.0645695		-0.0288294	0.00572677
-0.075095	-0.0462539	-0.0392775	-0.0114298	-0.0201088	-0.0423555	-0.0259707	-0.0423807	-0.011951	-0.00932824	-0.0209604	-0.0748523		-0.034997	0.00656874
-0.0871394	-0.055509	-0.0482202	-0.0141018	-0.0245013	-0.0501278	-0.0320233	-0.0507033	-0.0155557	-0.0122067	-0.0271259	-0.0851901		-0.041867	0.00741516
-0.0998787	-0.0658561	-0.0585379	-0.0170827	-0.0295411	-0.0587443	-0.0387148	-0.0600732	-0.0199687	-0.0155924	-0.034347	-0.0956845		-0.0495018	0.00827303
-0.113448	-0.0772348	-0.0701265	-0.0203742	-0.0352882	-0.0681558	-0.0460235	-0.070455	-0.0253168	-0.0195035	-0.0426557	-0.106558		-0.0579284	0.00915698
-0.12778	-0.0897333	-0.0828099	-0.024005	-0.0418927	-0.0782355	-0.053935	-0.0819129	-0.0316418	-0.0237244	-0.0519482	-0.11774		-0.0671132	0.0100691
-0.142502	-0.103102	-0.0966934	-0.0279225	-0.0493877	-0.0890723	-0.0622758	-0.0945076	-0.0389318	-0.0283259	-0.0622535	-0.129335		-0.0770257	0.0110009
-0.157595	-0.117409	-0.111374	-0.0321116	-0.0579154	-0.100628	-0.0710268	-0.108211	-0.0473409	-0.0334039	-0.073537	-0.141944		-0.0877081	0.0119631
-0.173342	-0.132627	-0.126851	-0.0366069	-0.0674902	-0.112779	-0.0801693	-0.123063	-0.0569988	-0.0387842	-0.085899	-0.156033		-0.0992203	0.0129849
-0.189572	-0.148589	-0.143523	-0.0414263	-0.0779479	-0.125593	-0.0895055	-0.139148	-0.0677876	-0.0445338	-0.0995251	-0.171271		-0.111535	0.014059
-0.206146	-0.165327	-0.161387	-0.0465599	-0.0894052	-0.13904	-0.0990937	-0.156423	-0.079788	-0.0506806	-0.114304	-0.187293		-0.124621	0.0151685
-0.223202	-0.182727	-0.180156	-0.0519686	-0.102106	-0.152916	-0.108925	-0.174939	-0.0929266	-0.0572913	-0.130118	-0.204165		-0.138453	0.0163165
-0.240543	-0.201141	-0.199771	-0.0577276	-0.115985	-0.167263	-0.119056	-0.194623	-0.106946	-0.0643236	-0.147077	-0.222042		-0.153041	0.0175141
-0.258217	-0.220693	-0.220291	-0.063776	-0.130979	-0.182164	-0.129708	-0.21505	-0.121727	-0.071629	-0.165176	-0.241301		-0.168393	0.0187834
-0.276286	-0.24122	-0.241364	-0.0699207	-0.147121	-0.197514	-0.140818	-0.236065	-0.137169	-0.0793018	-0.184375	-0.261603		-0.184396	0.0201113
-0.294534	-0.262724	-0.262997	-0.0763615	-0.164368	-0.213253	-0.152399	-0.257772	-0.153537	-0.0873725	-0.204702	-0.281996		-0.201001	0.0214533
-0.312927	-0.284531	-0.285389	-0.0832353	-0.182123	-0.229363	-0.164573	-0.28034	-0.170879	-0.0958749	-0.225734	-0.302932		-0.218158	0.0228143
-0.331507	-0.306539	-0.308508	-0.0905487	-0.199753	-0.245611	-0.177379	-0.303671	-0.189161	-0.104821	-0.247521	-0.324544		-0.235797	0.0242004
-0.350316	-0.32932	-0.332482	-0.0984402	-0.217568	-0.261907	-0.190968	-0.327729	-0.20833	-0.114271	-0.270539	-0.345932		-0.253983	0.0255903
-0.368869	-0.353124	-0.357163	-0.106724	-0.235938	-0.278398	-0.205408	-0.352613	-0.227933	-0.124261	-0.294419	-0.3667		-0.272629	0.026974
-0.386737	-0.378063	-0.382255	-0.115272	-0.254902	-0.295033	-0.220688	-0.377991	-0.248115	-0.1347	-0.318882	-0.386694		-0.291611	0.0283356
-0.404291	-0.403803	-0.407687	-0.124257	-0.274424	-0.311734	-0.236788	-0.403722	-0.269068	-0.145708	-0.344252	-0.406442		-0.311015	0.0296794
-0.421765	-0.430281	-0.433477	-0.133772	-0.29424	-0.328489	-0.253626	-0.429712	-0.290828	-0.157182	-0.37036	-0.426071		-0.330817	0.0310178
-0.439094	-0.457173	-0.459611	-0.143828	-0.314078	-0.345306	-0.271188	-0.456013	-0.31345	-0.169071	-0.396876	-0.444915		-0.350884	0.0323307
-0.456117	-0.484074	-0.486067	-0.154611	-0.334121	-0.36209	-0.289292	-0.483014	-0.337016	-0.181582	-0.423819	-0.462464		-0.371189	0.0335915
-0.472601	-0.511335	-0.512932	-0.166228	-0.354631	-0.378764	-0.307899	-0.51077	-0.361714	-0.194625	-0.450391	-0.479445		-0.391778	0.0348172
-0.488729	-0.538938	-0.540048	-0.178396	-0.375392	-0.395549	-0.327003	-0.538953	-0.387184	-0.208151	-0.476661	-0.497466		-0.412706	0.0360524
-0.504819	-0.567391	-0.56738	-0.191075	-0.396795	-0.412536	-0.346416	-0.567368	-0.413167	-0.222169	-0.503457	-0.516647		-0.434102	0.0373228
-0.520776	-0.597082	-0.595086	-0.204296	-0.419303	-0.429766	-0.366179	-0.595636	-0.439495	-0.236646	-0.530278	-0.537082		-0.455969	0.0386202
-0.536348	-0.626845	-0.622916	-0.217898	-0.44233	-0.44721	-0.386199	-0.622861	-0.466369	-0.251544	-0.557289	-0.55852		-0.478027	0.0398894
-0.55195	-0.65593	-0.650958	-0.232036	-0.465565	-0.464837	-0.406369	-0.649366	-0.493708	-0.266744	-0.584602	-0.579676		-0.500145	0.0411076
-0.568087	-0.684603	-0.67936	-0.24674	-0.488991	-0.482854	-0.426845	-0.676162	-0.520988	-0.282172	-0.611959	-0.600594		-0.522446	0.0423121
-0.584217	-0.712721	-0.708023	-0.261763	-0.512348	-0.501324	-0.447602	-0.703367	-0.548504	-0.297796	-0.639643	-0.621783		-0.544924	0.043518
-0.599959	-0.74045	-0.736998	-0.277008	-0.535749	-0.520315	-0.468061	-0.730401	-0.576266	-0.313711	-0.667707	-0.64308		-0.567475	0.0447196
-0.615473	-0.768589	-0.766041	-0.292343	-0.559397	-0.539802	-0.488037	-0.756819	-0.604306	-0.329919	-0.696058	-0.665082		-0.590155	0.0459369
-0.630869	-0.796674	-0.795105	-0.307666	-0.582961	-0.559751	-0.508134	-0.782913	-0.632546	-0.346256	-0.724483	-0.689053		-0.613034	0.0471778
-0.646349	-0.824225	-0.824267	-0.323019	-0.606164	-0.580257	-0.528403	-0.808597	-0.660754	-0.362775	-0.753572	-0.714315		-0.636058	0.0484238
-0.661669	-0.851867	-0.85355	-0.338311	-0.629229	-0.601062	-0.548643	-0.833995	-0.689047	-0.379482	-0.783344	-0.739436		-0.659136	0.0496889
-0.676644	-0.879737	-0.882929	-0.353465	-0.652021	-0.621884	-0.568645	-0.859121	-0.717497	-0.396341	-0.81367	-0.764226		-0.682182	0.0509849
-0.691471	-0.907895	-0.912085	-0.368556	-0.674429	-0.642842	-0.588099	-0.884121	-0.746287	-0.413417	-0.844656	-0.788343		-0.705183	0.0523068
-0.706308	-0.936384	-0.941172	-0.383575	-0.696694	-0.664126	-0.607301	-0.910086	-0.775095	-0.430683	-0.875265	-0.81253		-0.728268	0.0536681
-0.72112	-0.965259	-0.9703	-0.39845	-0.718632	-0.685563	-0.62662	-0.936719	-0.804387	-0.448316	-0.905803	-0.8382		-0.751614	0.055083
-0.735646	-0.994923	-0.999422	-0.413105	-0.740293	-0.707083	-0.645941	-0.96333	-0.834417	-0.466312	-0.936534	-0.864559		-0.77513	0.0565499
-0.750103	-1.02561	-1.02869	-0.427497	-0.761995	-0.72875	-0.665259	-0.989943	-0.864397	-0.484469	-0.966803	-0.890622		-0.798678	0.0580571
-0.764677	-1.05716	-1.05806	-0.44176	-0.783743	-0.750313	-0.685165	-1.01717	-0.894427	-0.502764	-0.996493	-0.916546		-0.822356	0.0595979
-0.779229	-1.08884	-1.08774	-0.456032	-0.805462	-0.771714	-0.705727	-1.04536	-0.92452	-0.52123	-1.0252	-0.942471		-0.846127	0.0611497
-0.793764	-1.12046	-1.11761	-0.470297	-0.827076	-0.792902	-0.726427	-1.07388	-0.954695	-0.539919	-1.05358	-0.968805		-0.869952	0.0627148
-0.808405	-1.15227	-1.14704	-0.484575	-0.848498	-0.813846	-0.74722	-1.10284	-0.984992	-0.558518	-1.08246	-0.995985		-0.893887	0.0643196
-0.823495	-1.18436	-1.1762	-0.49892	-0.869752	-0.834896	-0.768157	-1.13179	-1.01524	-0.576793	-1.11107	-1.02376		-0.91787	0.0659378
-0.839106	-1.21644	-1.20553	-0.51332	-0.891303	-0.85627	-0.78957	-1.16047	-1.04554	-0.595	-1.13916	-1.05159		-0.941941	0.067533
-0.8552	-1.24736	-1.23539	-0.527696	-0.913403	-0.87783	-0.811689	-1.18962	-1.07591	-0.613432	-1.16768	-1.07975		-0.966246	0.0691109
-0.871644	-1.27796	-1.2657	-0.542069	-0.935833	-0.899368	-0.834168	-1.21906	-1.10641	-0.631934	-1.19671	-1.10787		-0.990727	0.0707031
-0.888242	-1.30917	-1.29612	-0.556469	-0.958726	-0.920953	-0.856763	-1.24842	-1.13695	-0.650226	-1.22555	-1.13573		-1.01528	0.0723132
-0.905234	-1.34023	-1.32672	-0.570839	-0.982084	-0.942477	-0.879238	-1.27775	-1.16751	-0.668625	-1.25448	-1.16451		-1.03997	0.0739336
-0.922607	-1.37154	-1.35693	-0.585169	-1.00567	-0.963764	-0.901611	-1.30717	-1.19824	-0.687423	-1.28402	-1.19415		-1.06486	0.0755676
-0.940334	-1.40278	-1.38676	-0.5992	-1.02944	-0.985023	-0.92403	-1.33645	-1.2291	-0.706617	-1.3144	-1.22531		-1.08995	0.0772221
-0.958525	-1.4336	-1.41654	-0.612947	-1.05356	-1.00628	-0.946432	-1.36565	-1.25966	-0.726117	-1.34631	-1.25764		-1.11527	0.0789042
-0.977082	-1.4647	-1.44638	-0.626723	-1.07822	-1.02753	-0.968858	-1.39504	-1.2899	-0.745872	-1.37916	-1.28922		-1.14072	0.0805923
-0.996101	-1.49617	-1.47707	-0.640602	-1.1034	-1.04876	-0.991398	-1.42451	-1.32002	-0.766105	-1.41181	-1.32016		-1.16634	0.0822731
-1.0153	-1.52775	-1.50809	-0.654651	-1.12908	-1.06983	-1.01389	-1.45436	-1.34984	-0.787054	-1.44508	-1.35038		-1.19211	0.0839407
-1.03428	-1.55942	-1.53895	-0.668855	-1.1548	-1.09064	-1.03581	-1.48467	-1.37947	-0.808244	-1.47921	-1.38015		-1.21787	0.0856308
-1.05322	-1.59223	-1.57002	-0.683286	-1.18046	-1.11117	-1.05693	-1.51503	-1.40888	-0.829107	-1.51327	-1.40917		-1.24356	0.0873684
-1.07255	-1.62563	-1.6013	-0.697976	-1.20636	-1.13148	-1.07743	-1.54521	-1.43806	-0.850148	-1.5474	-1.43692		-1.26921	0.0890953
-1.09238	-1.65855	-1.6327	-0.712863	-1.232	-1.15115	-1.09751	-1.57525	-1.46715	-0.871747	-1.58198	-1.46401		-1.29477	0.0907902
-1.11213	-1.69151	-1.66395	-0.728108	-1.25735	-1.17011	-1.11754	-1.60495	-1.49609	-0.893657	-1.61691	-1.49012		-1.3202	0.0924547
-1.13155	-1.72436	-1.6955	-0.743819	-1.2831	-1.18889	-1.13762	-1.6342	-1.52498	-0.915731	-1.65184	-1.51578		-1.34562	0.094089
-1.15071	-1.75765	-1.72728	-0.760083	-1.30938	-1.20768	-1.15759	-1.66308	-1.55364	-0.937937	-1.68663	-1.54118		-1.37107	0.0957027
-1.16984	-1.79161	-1.75881	-0.776815	-1.33581	-1.22654	-1.17738	-1.69152	-1.58212	-0.960251	-1.72146	-1.56634		-1.39654	0.0972967
-1.1893	-1.82573	-1.79002	-0.793785	-1.36242	-1.24545	-1.19684	-1.71947	-1.61029	-0.982715	-1.75614	-1.59143		-1.42196	0.0988542
-1.20892	-1.85995	-1.82076	-0.810911	-1.38939	-1.26435	-1.21599	-1.7468	-1.63808	-1.00525	-1.79054	-1.61575		-1.44722	0.100363
-1.22887	-1.89424	-1.85146	-0.828058	-1.41663	-1.28323	-1.23522	-1.77376	-1.66577	-1.02756	-1.82438	-1.64004		-1.47243	0.101853
-1.24929	-1.92824	-1.88187	-0.845198	-1.44423	-1.30225	-1.25496	-1.80042	-1.69328	-1.05011	-1.85667	-1.66431		-1.49757	0.103252
-1.26964	-1.96123	-1.91168	-0.862311	-1.47207	-1.3214	-1.27535	-1.82649	-1.72058	-1.07313	-1.8875	-1.68861		-1.5225	0.104526
-1.28953	-1.99399	-1.941	-0.879438	-1.4999	-1.34032	-1.29599	-1.85228	-1.7473	-1.09607	-1.91686	-1.7143		-1.54725	0.105757
-1.30886	-2.02742	-1.96959	-0.896776	-1.52816	-1.35956	-1.31652	-1.87781	-1.77341	-1.11876	-1.94445	-1.74133		-1.57189	0.106951
-1.32799	-2.06145	-1.99778	-0.914106	-1.5567	-1.3794	-1.33688	-1.90294	-1.79925	-1.14111	-1.97146	-1.76843		-1.59646	0.108139
-1.34737	-2.09585	-2.02577	-0.931309	-1.58478	-1.39937	-1.35705	-1.9279	-1.82468	-1.16316	-1.99819	-1.79469		-1.62085	0.109327
-1.36715	-2.12993	-2.05362	-0.948535	-1.6125	-1.4194	-1.37682	-1.95271	-1.84999	-1.18482	-2.02417	-1.82086		-1.64504	0.110489
-1.38721	-2.16391	-2.08167	-0.965673	-1.64013	-1.43929	-1.39579	-1.97725	-1.87538	-1.20576	-2.04939	-1.8477		-1.6691	0.111681
-1.4072	-2.19824	-2.11001	-0.982668	-1.6675	-1.45909	-1.41418	-2.00139	-1.90076	-1.22604	-2.07417	-1.87476		-1.693	0.112922
-1.42654	-2.23248	-2.13862	-0.999616	-1.69466	-1.47885	-1.43226	-2.02526	-1.92586	-1.24579	-2.09813	-1.90137		-1.71662	0.114174
-1.44512	-2.26614	-2.16722	-1.01671	-1.7217	-1.49839	-1.45005	-2.0488	-1.95047	-1.26544	-2.12005	-1.92771		-1.73982	0.115364
-1.46344	-2.3003	-2.19534	-1.03401	-1.74855	-1.51763	-1.46744	-2.0721	-1.97478	-1.28516	-2.14145	-1.95391		-1.76284	0.116545
-1.48169	-2.33572	-2.22307	-1.05135	-1.77531	-1.53675	-1.48421	-2.09552	-1.99891	-1.30496	-2.16378	-1.9798		-1.78592	0.117797
-1.49999	-2.37083	-2.25095	-1.06851	-1.80217	-1.55617	-1.5006	-2.11867	-2.02321	-1.32481	-2.18705	-2.00563		-1.80905	0.119077
-1.5185	-2.40504	-2.27911	-1.08534	-1.82914	-1.57571	-1.51646	-2.14152	-2.04757	-1.34435	-2.21156	-2.03176		-1.83217	0.120396
-1.5371	-2.43848	-2.3073	-1.10216	-1.85626	-1.5951	-1.53145	-2.16422	-2.07161	-1.36396	-2.23623	-2.05873		-1.85522	0.121717
-1.55544	-2.47117	-2.33549	-1.11912	-1.88376	-1.61428	-1.54596	-2.18649	-2.09544	-1.38378	-2.26105	-2.08571		-1.87814	0.123015
-1.57312	-2.50386	-2.3638	-1.13604	-1.91153	-1.63288	-1.56044	-2.20854	-2.11903	-1.40387	-2.28659	-2.11121		-1.90091	0.124328
-1.58941	-2.53626	-2.39203	-1.15309	-1.93961	-1.65087	-1.57527	-2.23039	-2.14241	-1.42467	-2.31243	-2.1346		-1.92342	0.125612
-1.60404	-2.56782	-2.42012	-1.17024	-1.96821	-1.66856	-1.59037	-2.25206	-2.16532	-1.44591	-2.33866	-2.1565		-1.94565	0.126864
-1.61847	-2.59851	-2.4479	-1.18718	-1.99716	-1.68595	-1.60536	-2.27375	-2.18806	-1.46765	-2.3661	-2.17813		-1.96785	0.128113
-1.63315	-2.62835	-2.47538	-1.20389	-2.02631	-1.70309	-1.61997	-2.29521	-2.21108	-1.48971	-2.39588	-2.19925		-1.99011	0.129387
-1.64744	-2.65748	-2.50334	-1.22039	-2.05582	-1.72001	-1.63433	-2.31629	-2.23397	-1.51175	-2.42672	-2.2203		-2.01232	0.1307
-1.66155	-2.68623	-2.53177	-1.23664	-2.08568	-1.73666	-1.64866	-2.3368	-2.25671	-1.53372	-2.45713	-2.24252		-2.03451	0.132039
-1.67548	-2.71501	-2.55995	-1.25282	-2.11582	-1.75321	-1.66263	-2.35658	-2.27921	-1.55563	-2.48753	-2.26476		-2.05655	0.133385
-1.68917	-2.7439	-2.5876	-1.26885	-2.14626	-1.76973	-1.6767	-2.37581	-2.30149	-1.5778	-2.51754	-2.28553		-2.07836	0.134696
-1.70247	-2.77308	-2.61495	-1.28465	-2.17686	-1.78603	-1.69106	-2.39485	-2.32365	-1.59999	-2.54682	-2.30629		-2.10006	0.136013
-1.7152	-2.80224	-2.64233	-1.30047	-2.20751	-1.8023	-1.70504	-2.41372	-2.34556	-1.62212	-2.57551	-2.32845		-2.1217	0.137359
-1.72769	-2.83096	-2.66956	-1.31635	-2.23831	-1.81904	-1.71866	-2.43209	-2.36713	-1.64424	-2.60397	-2.35162		-2.1433	0.138692
-1.74063	-2.86004	-2.6965	-1.33211	-2.26917	-1.83631	-1.73216	-2.45007	-2.3885	-1.66623	-2.63218	-2.37553		-2.16495	0.140026
-1.75432	-2.88963	-2.72321	-1.34769	-2.29988	-1.85383	-1.74523	-2.46772	-2.40991	-1.68829	-2.65934	-2.39982		-2.18657	0.141351
-1.76763	-2.91965	-2.74998	-1.36325	-2.33055	-1.87154	-1.75767	-2.4848	-2.43112	-1.71035	-2.68563	-2.42426		-2.20804	0.142693
-1.78008	-2.95042	-2.77692	-1.37845	-2.36126	-1.88955	-1.76979	-2.50141	-2.45192	-1.73232	-2.7116	-2.44847		-2.22935	0.144098
-1.79203	-2.98094	-2.80367	-1.39305	-2.39177	-1.90784	-1.78179	-2.51764	-2.47233	-1.75397	-2.73745	-2.47175		-2.25035	0.145519
-1.80332	-3.0106	-2.83003	-1.40732	-2.42193	-1.92626	-1.79384	-2.53362	-2.49215	-1.77526	-2.76319	-2.49341		-2.27091	0.146908
-1.8139	-3.04005	-2.85624	-1.42128	-2.45177	-1.94459	-1.80617	-2.54943	-2.51135	-1.79661	-2.78859	-2.51385		-2.29115	0.148286
-1.82383	-3.0692	-2.88281	-1.43489	-2.48129	-1.96284	-1.81856	-2.56495	-2.53001	-1.81799	-2.81356	-2.53402		-2.31116	0.149678
-1.83356	-3.09719	-2.90932	-1.44809	-2.5106	-1.98138	-1.83085	-2.57999	-2.54795	-1.83932	-2.83837	-2.55269		-2.33078	0.15102
-1.84323	-3.12449	-2.93525	-1.46068	-2.53977	-1.99993	-1.84317	-2.5945	-2.56495	-1.86042	-2.86303	-2.56939		-2.3499	0.152318
-1.85267	-3.15162	-2.96084	-1.47266	-2.56869	-2.01816	-1.85535	-2.60868	-2.58129	-1.88108	-2.88684	-2.58523		-2.36859	0.15362
-1.86183	-3.17745	-2.98587	-1.48404	-2.59755	-2.03632	-1.86728	-2.62251	-2.59727	-1.90125	-2.90992	-2.60053		-2.38682	0.154887
-1.87059	-3.2026	-3.01043	-1.49491	-2.6266	-2.05446	-1.8792	-2.63584	-2.6129	-1.9211	-2.93305	-2.61539		-2.40476	0.156157
-1.87916	-3.22778	-3.03445	-1.50528	-2.65558	-2.07264	-1.89124	-2.64861	-2.62819	-1.94072	-2.95601	-2.63007		-2.42248	0.157435
-1.88739	-3.2522	-3.05783	-1.51533	-2.68454	-2.09081	-1.90334	-2.66117	-2.64307	-1.96019	-2.9783	-2.64493		-2.43993	0.158679
-1.89488	-3.27652	-3.08108	-1.52509	-2.71344	-2.10882	-1.91534	-2.67354	-2.65744	-1.97989	-2.99982	-2.66005		-2.45716	0.159936
-1.90183	-3.30067	-3.10417	-1.53432	-2.74179	-2.12683	-1.92716	-2.68525	-2.6715	-1.99972	-3.0206	-2.67542		-2.47411	0.161199
-1.90848	-3.32365	-3.12707	-1.5432	-2.7699	-2.14491	-1.93878	-2.69646	-2.68539	-2.01907	-3.04088	-2.69064		-2.4907	0.162439
-1.91463	-3.34547	-3.14978	-1.55196	-2.79815	-2.16307	-1.95008	-2.70732	-2.69882	-2.0379	-3.0606	-2.70555		-2.50694	0.163653
-1.92015	-3.36686	-3.17246	-1.56054	-2.82639	-2.18108	-1.96113	-2.71793	-2.71196	-2.05643	-3.07925	-2.72052		-2.52289	0.164872
-1.92518	-3.38812	-3.19519	-1.56869	-2.85468	-2.19903	-1.97205	-2.72842	-2.72507	-2.07469	-3.09656	-2.73518		-2.53857	0.166105
-1.92959	-3.40899	-3.21781	-1.57646	-2.88316	-2.21704	-1.98278	-2.73821	-2.73773	-2.09303	-3.1128	-2.7489		-2.55388	0.167326
-1.93309	-3.42998	-3.24063	-1.58402	-2.91163	-2.23492	-1.99329	-2.74747	-2.74978	-2.11158	-3.12816	-2.76167		-2.56885	0.168571
-1.93572	-3.4507	-3.26341	-1.59131	-2.93979	-2.25245	-2.00368	-2.75658	-2.76127	-2.12986	-3.14226	-2.77408		-2.58343	0.169826
-1.93757	-3.47109	-3.28614	-1.59842	-2.96728	-2.26954	-2.01409	-2.76531	-2.77211	-2.14774	-3.15514	-2.78597		-2.59753	0.171073
-1.939	-3.49179	-3.30904	-1.6055	-2.99359	-2.28633	-2.02441	-2.77366	-2.78245	-2.16528	-3.16705	-2.79668		-2.61123	0.172322
-1.94025	-3.51197	-3.33158	-1.61273	-3.01917	-2.30289	-2.03458	-2.78172	-2.79231	-2.18229	-3.17797	-2.8065		-2.6245	0.173522
-1.94105	-3.53178	-3.35385	-1.62015	-3.04457	-2.31911	-2.04453	-2.7897	-2.8016	-2.1991	-3.18795	-2.8155		-2.63741	0.174699
-1.94131	-3.55182	-3.3762	-1.62747	-3.06945	-2.33481	-2.0543	-2.79769	-2.81027	-2.21591	-3.1969	-2.82376		-2.64999	0.175892
-1.94138	-3.57193	-3.39836	-1.63467	-3.09383	-2.34994	-2.06426	-2.80558	-2.81856	-2.23254	-3.20486	-2.83161		-2.66229	0.177078
-1.94124	-3.59252	-3.42026	-1.64182	-3.11796	-2.3646	-2.07434	-2.81322	-2.82654	-2.24891	-3.21204	-2.83884		-2.67436	0.178278
-1.94056	-3.61299	-3.44172	-1.649	-3.14183	-2.37862	-2.08449	-2.82064	-2.83409	-2.26477	-3.21852	-2.84542		-2.68605	0.179479
-1.93937	-3.6328	-3.46256	-1.6561	-3.16529	-2.39209	-2.09479	-2.82825	-2.84139	-2.27998	-3.22416	-2.85172		-2.69737	0.180656
-1.93818	-3.65245	-3.483	-1.66296	-3.18822	-2.40493	-2.105	-2.83595	-2.8485	-2.29475	-3.22887	-2.85812		-2.70841	0.181829
-1.93722	-3.67173	-3.50315	-1.66959	-3.21098	-2.41709	-2.11509	-2.84369	-2.8553	-2.3095	-3.23318	-2.86437		-2.71924	0.182994
-1.93632	-3.6901	-3.52294	-1.67595	-3.23394	-2.42881	-2.12522	-2.85172	-2.8618	-2.32433	-3.2371	-2.8705		-2.72989	0.184135
-1.93542	-3.70793	-3.54234	-1.68202	-3.25734	-2.43979	-2.13524	-2.85966	-2.86812	-2.33889	-3.24047	-2.87707		-2.74036	0.185286
-1.93449	-3.72583	-3.56159	-1.68765	-3.28119	-2.45	-2.14516	-2.86754	-2.87434	-2.35317	-3.24347	-2.88356		-2.75066	0.186488
-1.93352	-3.74353	-3.58054	-1.69286	-3.30545	-2.45962	-2.155	-2.8755	-2.88049	-2.36718	-3.24599	-2.88956		-2.76077	0.187717
-1.93238	-3.76118	-3.59886	-1.69797	-3.32991	-2.46863	-2.16477	-2.88334	-2.88628	-2.38099	-3.24821	-2.8952		-2.77064	0.188956
-1.93085	-3.77908	-3.61686	-1.70286	-3.3544	-2.47708	-2.1742	-2.89109	-2.89162	-2.39464	-3.2502	-2.9006		-2.78029	0.190243
-1.92893	-3.79661	-3.6347	-1.70748	-3.37861	-2.48493	-2.18326	-2.89857	-2.89687	-2.40804	-3.2518	-2.90624		-2.78967	0.191557
-1.92691	-3.81381	-3.65253	-1.7119	-3.40215	-2.49225	-2.19216	-2.90582	-2.90213	-2.42167	-3.25309	-2.91213		-2.79888	0.19287
-1.92517	-3.83105	-3.67058	-1.71606	-3.4253	-2.49918	-2.20084	-2.91289	-2.90728	-2.4353	-3.25409	-2.91828		-2.808	0.194204
-1.92362	-3.84798	-3.68862	-1.72009	-3.44811	-2.506	-2.20951	-2.91966	-2.91219	-2.44832	-3.25469	-2.9244		-2.81693	0.195531
-1.92215	-3.8648	-3.70639	-1.72405	-3.47023	-2.51263	-2.21802	-2.92617	-2.91699	-2.46073	-3.25485	-2.93032		-2.82561	0.196847
-1.9208	-3.88197	-3.72401	-1.72787	-3.49201	-2.51909	-2.22632	-2.93246	-2.92176	-2.47264	-3.25454	-2.93604		-2.83413	0.198183
-1.91953	-3.89912	-3.74156	-1.7315	-3.51379	-2.5257	-2.23469	-2.93862	-2.9263	-2.4845	-3.25376	-2.94128		-2.84253	0.19952
-1.91837	-3.91589	-3.75898	-1.7351	-3.53513	-2.53238	-2.24278	-2.94459	-2.93056	-2.49616	-3.25274	-2.94656		-2.85077	0.20084
-1.91731	-3.93266	-3.77627	-1.73864	-3.55569	-2.53907	-2.25062	-2.95034	-2.93468	-2.50732	-3.25165	-2.95194		-2.85885	0.202157
-1.9164	-3.94956	-3.79335	-1.74196	-3.57557	-2.54588	-2.25842	-2.95599	-2.93915	-2.51834	-3.2504	-2.9574		-2.86687	0.203471
-1.91572	-3.96652	-3.81003	-1.74519	-3.59483	-2.55272	-2.26636	-2.96151	-2.94384	-2.52935	-3.2491	-2.96296		-2.87484	0.204759
-1.91544	-3.98359	-3.82638	-1.74829	-3.61367	-2.55968	-2.27456	-2.96702	-2.94822	-2.54017	-3.24789	-2.9682		-2.88276	0.206024
-1.91546	-4.00065	-3.84248	-1.75124	-3.63227	-2.56676	-2.28283	-2.97266	-2.95253	-2.55077	-3.24672	-2.9734		-2.89065	0.20728
-1.9154	-4.01745	-3.85827	-1.75415	-3.65062	-2.57373	-2.2912	-2.97841	-2.95678	-2.56156	-3.24574	-2.97848		-2.89848	0.208521
-1.9151	-4.03407	-3.87386	-1.75688	-3.66878	-2.58061	-2.29964	-2.98422	-2.961	-2.57271	-3.2452	-2.98355		-2.9063	0.209768
-1.91479	-4.05055	-3.88941	-1.75941	-3.68685	-2.5876	-2.30829	-2.99004	-2.96524	-2.58423	-3.24514	-2.98854		-2.91417	0.211018
-1.9145	-4.06685	-3.90475	-1.76189	-3.70457	-2.59447	-2.31715	-2.99591	-2.9694	-2.59602	-3.24552	-2.99317		-2.92202	0.21225
-1.91414	-4.08282	-3.91965	-1.76431	-3.7217	-2.60112	-2.32611	-3.00172	-2.97364	-2.60755	-3.24622	-2.99809		-2.92976	0.213458
-1.91376	-4.09833	-3.93412	-1.76669	-3.73854	-2.60772	-2.33555	-3.0076	-2.97796	-2.61904	-3.24709	-3.00363		-2.9375	0.214627
-1.91342	-4.11373	-3.94852	-1.76904	-3.75522	-2.61415	-2.34523	-3.01373	-2.98224	-2.6309	-3.24792	-3.00988		-2.94533	0.215786
-1.9134	-4.1288	-3.96307	-1.77135	-3.77164	-2.62049	-2.35497	-3.01997	-2.98626	-2.64276	-3.24875	-3.01633		-2.95315	0.216926
-1.91365	-4.14316	-3.97761	-1.77349	-3.78767	-2.6266	-2.36487	-3.02636	-2.98998	-2.65449	-3.24974	-3.02284		-2.96087	0.218031
-1.914	-4.15706	-3.99189	-1.77547	-3.80333	-2.63246	-2.37476	-3.03283	-2.99367	-2.66605	-3.25084	-3.02994		-2.96852	0.219114
-1.91447	-4.17079	-4.00566	-1.77743	-3.81888	-2.63853	-2.38478	-3.03918	-2.9973	-2.67695	-3.25222	-3.03729		-2.97612	0.220174
-1.91509	-4.18472	-4.01902	-1.77933	-3.83427	-2.6448	-2.39477	-3.04554	-3.00077	-2.68711	-3.25382	-3.04495		-2.98368	0.221235
-1.91595	-4.1987	-4.03201	-1.78124	-3.84956	-2.6511	-2.40479	-3.052	-3.00411	-2.69688	-3.25542	-3.05287		-2.99122	0.22228
-1.91684	-4.21241	-4.04475	-1.78323	-3.86494	-2.65742	-2.41485	-3.05853	-3.00751	-2.70608	-3.25703	-3.06111		-2.99873	0.223314
-1.91772	-4.22581	-4.05749	-1.78516	-3.8805	-2.66383	-2.42484	-3.06516	-3.0112	-2.71479	-3.25862	-3.06993		-3.00625	0.224354
-1.91878	-4.2391	-4.07017	-1.78692	-3.8961	-2.67044	-2.43477	-3.07183	-3.01501	-2.72353	-3.26026	-3.07869		-3.0138	0.225392
-1.92022	-4.25265	-4.08281	-1.7885	-3.9116	-2.67707	-2.44449	-3.07851	-3.019	-2.73224	-3.2622	-3.08693		-3.02135	0.226438
-1.92195	-4.26628	-4.09526	-1.78998	-3.92707	-2.68372	-2.45421	-3.0851	-3.02321	-2.74068	-3.26475	-3.09459		-3.0289	0.227483
-1.92357	-4.28003	-4.10731	-1.79129	-3.94275	-2.69047	-2.4639	-3.09157	-3.02762	-2.74899	-3.26772	-3.10224		-3.03645	0.228543
-1.92513	-4.29422	-4.11916	-1.79262	-3.95885	-2.69747	-2.47346	-3.09805	-3.03256	-2.75735	-3.27101	-3.11017		-3.04417	0.229633
-1.92663	-4.30849	-4.13079	-1.79398	-3.97517	-2.70462	-2.48294	-3.10457	-3.03793	-2.76579	-3.27484	-3.11796		-3.05197	0.230731
-1.92816	-4.32275	-4.14248	-1.79526	-3.99154	-2.71171	-2.49219	-3.11136	-3.04359	-2.77482	-3.27904	-3.12575		-3.05989	0.23184
-1.92978	-4.33707	-4.15421	-1.79652	-4.00773	-2.7188	-2.50125	-3.11832	-3.0496	-2.78445	-3.28343	-3.13352		-3.06789	0.232946
-1.93129	-4.35108	-4.16579	-1.79769	-4.02373	-2.7257	-2.51032	-3.12543	-3.05587	-2.79429	-3.28806	-3.14139		-3.07589	0.23404
-1.93264	-4.36469	-4.17731	-1.79882	-4.03962	-2.73248	-2.51948	-3.13284	-3.06236	-2.80441	-3.29294	-3.14949		-3.08392	0.235121
-1.93388	-4.37826	-4.18843	-1.79994	-4.05514	-2.73912	-2.52855	-3.14043	-3.06887	-2.81455	-3.29809	-3.15731		-3.09188	0.236187
-1.93504	-4.3923	-4.19962	-1.80128	-4.07078	-2.74575	-2.53786	-3.14864	-3.07546	-2.82474	-3.3035	-3.16511		-3.10001	0.237272
-1.93589	-4.40634	-4.21051	-1.80287	-4.08624	-2.75235	-2.54717	-3.15707	-3.08198	-2.83469	-3.30879	-3.17262		-3.10804	0.238344
-1.93648	-4.42011	-4.22142	-1.80471	-4.102	-2.75899	-2.55636	-3.16594	-3.08861	-2.84461	-3.31407	-3.18054		-3.11615	0.239421
-1.93704	-4.43322	-4.23262	-1.80687	-4.1177	-2.7658	-2.56546	-3.17543	-3.09541	-2.85435	-3.31924	-3.18898		-3.12434	0.240471
-1.93754	-4.44551	-4.24366	-1.80905	-4.13275	-2.77278	-2.57432	-3.18506	-3.1021	-2.86362	-3.32404	-3.19709		-3.13229	0.241467
-1.93807	-4.45819	-4.25542	-1.81151	-4.1485	-2.78037	-2.58365	-3.19548	-3.10907	-2.87341	-3.32892	-3.20593		-3.14071	0.242499
-1.93858	-4.47017	-4.26663	-1.81396	-4.16316	-2.78756	-2.59272	-3.20549	-3.11562	-2.88257	-3.3335	-3.21463		-3.14871	0.243464
-1.93914	-4.48258	-4.27854	-1.8167	-4.17857	-2.79521	-2.60239	-3.21625	-3.12258	-2.89191	-3.33829	-3.22402		-3.15718	0.24447
-1.93968	-4.49497	-4.2902	-1.81953	-4.19361	-2.80288	-2.61175	-3.22692	-3.12944	-2.90099	-3.34296	-3.23311		-3.16551	0.245458
-1.94028	-4.5073	-4.30135	-1.82234	-4.20777	-2.81047	-2.62052	-3.23716	-3.13591	-2.90966	-3.34733	-3.2418		-3.17349	0.24641
-1.9411	-4.52164	-4.31514	-1.826	-4.22486	-2.81994	-2.63084	-3.24955	-3.14367	-2.92005	-3.35244	-3.25326		-3.18321	0.247539
-1.94162	-4.53019	-4.32375	-1.82833	-4.23543	-2.82586	-2.63711	-3.25718	-3.14848	-2.92643	-3.35556	-3.26066		-3.18922	0.248227

## Sheet: noise plus 90 y
fly1	fly2	fly3	fly4	fly5	fly6	fly7	fly8	fly9	fly10	fly11	fly12		Avg	SEM
1.48179e-06	-4.42847e-07	-1.96232e-07	-8.95599e-08	-0.000416353	-1.07932e-07	6.03807e-07	2.34373e-07	1.35697e-06	7.70309e-08	1.50167e-07	-5.18614e-07		-3.44837e-05	3.47159e-05
-5.8241e-07	1.80471e-07	2.61878e-07	4.82481e-07	-0.000548428	-2.38663e-07	-7.36708e-07	-1.81726e-07	-2.60971e-06	-7.3582e-08	8.33188e-09	5.99123e-07		-4.59432e-05	4.5681e-05
2.09989e-06	2.70453e-07	-2.61924e-07	-1.66135e-06	-0.000538989	6.49812e-07	8.08757e-07	4.00737e-08	3.24935e-06	4.2569e-08	-1.2382e-07	-5.13699e-07		-4.45324e-05	4.4952e-05
6.79921e-07	-7.70611e-07	1.6647e-07	1.05166e-05	-0.000670408	-9.95846e-07	-6.49153e-07	1.7774e-07	-3.28155e-06	1.71081e-08	3.14789e-07	2.12962e-07		-5.5335e-05	5.59239e-05
8.30813e-07	1.20746e-06	8.57179e-09	2.20914e-05	-0.000951804	1.15266e-06	-6.10974e-07	-4.30801e-07	3.34965e-06	-9.58733e-08	-1.11864e-06	3.05452e-07		-7.70929e-05	7.95401e-05
3.85462e-06	-1.26535e-06	-2.45632e-07	2.04162e-05	-0.00112509	-9.95744e-07	2.19871e-07	6.18622e-07	-1.57539e-06	1.73865e-07	2.02394e-07	-9.53864e-07		-9.2053e-05	9.39282e-05
-6.63196e-05	1.2963e-06	4.50639e-07	2.05677e-05	-0.00116103	5.73419e-07	-3.06473e-06	-6.43926e-07	1.58967e-06	-2.23766e-07	-2.0843e-06	1.60168e-06		-0.000100608	9.65849e-05
-0.000187558	-1.31871e-06	-6.88982e-07	2.08021e-05	-0.00110291	2.30881e-07	1.50585e-06	4.46236e-07	7.01223e-05	2.09856e-07	-3.32027e-07	-1.50423e-06		-0.000100083	9.27991e-05
-0.00031056	-1.49953e-06	9.71753e-07	2.0132e-05	-0.00100775	-1.99025e-06	-7.90928e-06	-1.77058e-07	2.7095e-05	-1.36315e-07	-3.81758e-06	2.0121e-06		-0.000106969	8.59844e-05
-0.000410137	-2.39661e-06	-3.36231e-07	2.02111e-05	-0.0010986	2.13284e-06	1.82233e-05	1.13405e-07	-6.03929e-05	4.61006e-09	5.09624e-06	-9.88337e-07		-0.000127255	9.47573e-05
-0.00046454	-8.57648e-06	1.76952e-06	2.01706e-05	-0.00118523	-5.25957e-06	0.000119553	1.39746e-06	-8.3403e-05	1.35314e-07	9.68326e-05	-1.84116e-06		-0.00012575	0.00010524
-0.000497508	-6.54109e-06	1.81207e-06	1.7021e-05	-0.00107913	2.69396e-06	0.000242158	-8.11654e-07	-0.000112409	-4.0623e-07	0.000221014	5.31417e-07		-0.000100965	0.000103359
-0.000391374	-2.23118e-05	8.99241e-07	3.4261e-05	-0.000942862	-8.21246e-06	0.000348836	2.1749e-06	-0.000104587	1.01641e-06	0.000325761	-1.92483e-05		-6.46373e-05	9.6644e-05
-2.29487e-05	9.91297e-05	6.59321e-06	7.71287e-05	-0.000919674	9.91577e-06	0.000497177	-2.1702e-06	-0.000111912	-1.60865e-07	0.000462726	-5.68396e-05		3.24708e-06	0.000100724
0.000562617	0.00041439	-3.60571e-05	0.000125933	-0.000906459	0.000110522	0.000788653	3.05002e-06	-0.00010921	1.85775e-06	0.000665652	-0.000115299		0.000125471	0.000130288
0.00136907	0.00092984	-0.000128476	0.00020023	-0.000783988	0.000220628	0.00113095	-5.37134e-05	-4.28211e-05	2.45534e-07	0.000935156	-3.07393e-05		0.000312199	0.000183578
0.00251789	0.00183632	-0.00029439	0.000322895	-0.000634764	0.000380822	0.00158666	-0.000182039	0.000106305	1.59801e-06	0.0012943	0.00026655		0.000600179	0.000281181
0.0040388	0.00311054	-0.000545494	0.00059143	-0.000360585	0.000595487	0.00234886	-0.000211438	0.000337617	1.88609e-06	0.00183271	0.000815281		0.00104626	0.000423574
0.00603351	0.00491168	-0.000737326	0.00112386	6.5005e-05	0.000919648	0.00333452	-0.00015864	0.000637892	-6.34462e-05	0.00259041	0.00174613		0.00170027	0.000614274
0.00877035	0.00737187	-0.000854283	0.00192695	0.000788133	0.00132724	0.00456854	-6.59779e-05	0.00119259	-0.000189039	0.00368136	0.00293755		0.00262127	0.000871049
0.0122937	0.010494	-0.00100502	0.00307577	0.00199284	0.00183352	0.00615583	4.2427e-05	0.00202148	-0.000305283	0.00514417	0.00442281		0.00384719	0.00119833
0.0166605	0.0146072	-0.00118125	0.00469701	0.00349416	0.00259686	0.00805072	0.000174551	0.00315286	-0.000367277	0.00690146	0.00628158		0.00542237	0.00161089
0.0220148	0.0197633	-0.00130123	0.00682888	0.00516102	0.00355419	0.0102953	0.000458042	0.00476727	-0.000401912	0.00916764	0.00863869		0.00741217	0.00211653
0.0282355	0.0258912	-0.00133628	0.00952698	0.00690193	0.00469375	0.0129903	0.000888113	0.00694735	-0.00044857	0.0119629	0.0116936		0.0098289	0.00270855
0.0353324	0.0329323	-0.00130398	0.0128475	0.0088917	0.00595256	0.0160608	0.00152748	0.00983619	-0.000433087	0.0152945	0.0152271		0.0126805	0.00337958
0.0434762	0.040889	-0.00112231	0.0167904	0.0112402	0.00749532	0.0193937	0.0024893	0.013557	-0.000347809	0.0192851	0.0191915		0.0160281	0.00412993
0.052691	0.0500481	-0.000839817	0.0213964	0.01383	0.00951065	0.0231202	0.00397105	0.0181533	-0.000235787	0.0238402	0.02353		0.0199179	0.0049716
0.0628681	0.0604575	-0.000415911	0.0267138	0.0166117	0.0119081	0.0272602	0.00601923	0.0236677	2.52461e-05	0.0290743	0.0280583		0.024354	0.00589923
0.0741784	0.0721395	0.000421079	0.0326468	0.0194293	0.0148028	0.0314818	0.00848842	0.0303388	0.000561618	0.0349459	0.0328534		0.0293573	0.00691474
0.0866909	0.0850075	0.00155171	0.0390832	0.022432	0.0181068	0.0358005	0.0115535	0.0383377	0.00153036	0.0414375	0.0377239		0.034938	0.0080161
0.0997918	0.0987252	0.00301521	0.0460419	0.0256416	0.0218446	0.0402836	0.0151999	0.0475175	0.00302668	0.0485249	0.0426482		0.0410218	0.00915758
0.113562	0.113379	0.00509533	0.0535377	0.0289808	0.0259227	0.0446243	0.0194408	0.057904	0.00499513	0.0560852	0.0478609		0.0476157	0.0103468
0.1284	0.128895	0.00779628	0.0615382	0.0326751	0.0300194	0.0488187	0.0243469	0.0695725	0.0074625	0.0644133	0.0533593		0.0547748	0.0116066
0.14418	0.145007	0.0111491	0.0699829	0.0366678	0.0344673	0.0528671	0.0297309	0.0824143	0.0104685	0.0735592	0.058954		0.062454	0.0129189
0.160953	0.161907	0.0151122	0.0788359	0.0409817	0.0393697	0.0566328	0.0357437	0.0963429	0.0141558	0.0835847	0.0644526		0.0706726	0.0142926
0.178547	0.179529	0.019735	0.0881143	0.0458183	0.0445264	0.0600017	0.0424475	0.111262	0.0185937	0.0944541	0.0699038		0.0794111	0.0157169
0.196924	0.197878	0.02501	0.0979218	0.0512229	0.0499477	0.0629712	0.0497056	0.126978	0.0236962	0.106008	0.075217		0.0886235	0.0171964
0.21629	0.216926	0.0309003	0.108212	0.0571722	0.0554769	0.0656479	0.0574419	0.143208	0.0295624	0.118409	0.0804577		0.0983087	0.0187406
0.236627	0.236449	0.0374581	0.118781	0.0634369	0.0609024	0.0677776	0.0655121	0.15992	0.0361943	0.131636	0.0857225		0.108368	0.0203508
0.257657	0.256452	0.0444245	0.129776	0.0699276	0.0661835	0.0694872	0.0738988	0.177347	0.0434637	0.145544	0.0908134		0.118748	0.0220345
0.279123	0.276395	0.0518664	0.141379	0.0766145	0.0714353	0.0708901	0.0826797	0.195512	0.0512123	0.159727	0.0958172		0.129388	0.0237512
0.301358	0.296509	0.0596559	0.153637	0.0832261	0.0765588	0.0717346	0.0919416	0.214401	0.0594053	0.174287	0.100718		0.140286	0.0255454
0.32419	0.317448	0.0675834	0.166538	0.0899099	0.081611	0.0723104	0.101714	0.233861	0.0681923	0.189556	0.105469		0.151532	0.0274341
0.346985	0.339077	0.0758446	0.18	0.0969133	0.0868294	0.072653	0.111996	0.253521	0.0775814	0.205255	0.109894		0.163046	0.0293578
0.369748	0.361405	0.0842761	0.194073	0.104108	0.0917858	0.0727059	0.122708	0.27353	0.0876347	0.221327	0.113701		0.17475	0.0313413
0.39258	0.38427	0.0929591	0.208711	0.111521	0.0964252	0.0725991	0.133792	0.294135	0.0983548	0.237727	0.117104		0.186682	0.0333833
0.41558	0.407775	0.101928	0.22394	0.119099	0.101037	0.0724274	0.14516	0.315252	0.109681	0.254427	0.12037		0.19889	0.0354822
0.43876	0.431539	0.111185	0.239842	0.126606	0.105283	0.0724243	0.156629	0.337034	0.121753	0.271493	0.123454		0.211334	0.0376323
0.461574	0.455027	0.120936	0.256397	0.134155	0.109154	0.0724613	0.168406	0.359791	0.134582	0.288712	0.126263		0.223955	0.039789
0.483925	0.478582	0.131008	0.273728	0.142058	0.112912	0.0727179	0.180611	0.383421	0.148066	0.305611	0.129029		0.236806	0.0419424
0.50638	0.502317	0.141383	0.291638	0.150342	0.116579	0.0732996	0.193098	0.407584	0.162328	0.32251	0.131901		0.249947	0.0441111
0.529135	0.526753	0.152027	0.309733	0.159097	0.119992	0.0740746	0.205891	0.432049	0.177532	0.340221	0.135086		0.263466	0.0463271
0.551979	0.552032	0.163068	0.328086	0.168513	0.123156	0.0752316	0.218819	0.456672	0.193562	0.358425	0.138689		0.277353	0.048569
0.574775	0.576975	0.174552	0.34688	0.178309	0.126327	0.0765828	0.23151	0.481661	0.21032	0.37687	0.142158		0.29141	0.0508048
0.597727	0.601065	0.1863	0.365895	0.188351	0.129394	0.0781539	0.243942	0.506779	0.227894	0.395654	0.145444		0.30555	0.0530227
0.62073	0.625031	0.198536	0.384992	0.198797	0.132427	0.0799406	0.256481	0.531737	0.246215	0.414672	0.148667		0.319852	0.0552262
0.643464	0.648667	0.211211	0.404419	0.209644	0.135567	0.0819834	0.269159	0.556743	0.265149	0.434029	0.151911		0.334329	0.0573989
0.66594	0.671531	0.224424	0.424188	0.221016	0.138726	0.0843522	0.281811	0.581565	0.284654	0.453688	0.155498		0.348949	0.0595073
0.68817	0.694616	0.238244	0.444053	0.23313	0.142132	0.086678	0.294378	0.606252	0.304668	0.473416	0.1594		0.363761	0.0615926
0.71034	0.717949	0.252431	0.464068	0.245901	0.146054	0.0891101	0.306568	0.630995	0.32522	0.493215	0.163742		0.378799	0.0636613
0.732521	0.741241	0.26712	0.484284	0.259108	0.15046	0.0916343	0.318519	0.65576	0.34643	0.513372	0.168439		0.394074	0.0657106
0.754416	0.765099	0.282225	0.504671	0.27282	0.155241	0.0942595	0.330592	0.680447	0.36824	0.533621	0.173294		0.409577	0.0677518
0.775946	0.789776	0.297672	0.5255	0.286897	0.160712	0.0972291	0.342502	0.705032	0.390473	0.553916	0.178481		0.425345	0.0697777
0.797284	0.81513	0.313553	0.546693	0.301245	0.166949	0.100663	0.354122	0.729617	0.413228	0.574284	0.183788		0.44138	0.0717915
0.818583	0.840991	0.329905	0.567984	0.315921	0.173804	0.104673	0.365879	0.754166	0.436618	0.594113	0.189474		0.457676	0.0737672
0.840086	0.867701	0.346701	0.589676	0.330769	0.181405	0.109125	0.377971	0.779262	0.460374	0.613631	0.195795		0.474375	0.0757464
0.861982	0.895174	0.363703	0.611844	0.345897	0.189705	0.114135	0.390093	0.804901	0.484479	0.633128	0.202156		0.491433	0.0777545
0.884402	0.923677	0.380943	0.634175	0.361202	0.198775	0.11962	0.402189	0.830644	0.50911	0.652296	0.208412		0.508787	0.0797915
0.907375	0.95362	0.398328	0.656586	0.376446	0.208606	0.125528	0.414488	0.856625	0.534102	0.670984	0.214161		0.526404	0.0818913
0.930914	0.984061	0.41591	0.679172	0.391332	0.219036	0.131881	0.427027	0.882529	0.559537	0.689227	0.219469		0.544175	0.0840149
0.955327	1.0148	0.433653	0.701965	0.405645	0.229874	0.13856	0.439947	0.908209	0.585479	0.707289	0.225257		0.562167	0.0861495
0.980416	1.04597	0.451179	0.724964	0.419694	0.24119	0.14569	0.453086	0.933687	0.611371	0.725475	0.231677		0.580367	0.0882861
1.006	1.07744	0.468999	0.748306	0.433552	0.253378	0.153127	0.46607	0.959003	0.636983	0.743655	0.238506		0.598752	0.0904104
1.03225	1.10888	0.487341	0.771974	0.447452	0.266347	0.160832	0.47917	0.984381	0.662971	0.761451	0.245587		0.617386	0.0925191
1.05912	1.13949	0.505992	0.795806	0.461512	0.280124	0.168723	0.492697	1.00984	0.689654	0.77936	0.253137		0.636288	0.0945772
1.08663	1.1702	0.524909	0.819874	0.475512	0.294709	0.176775	0.506485	1.03523	0.716639	0.797533	0.260729		0.655436	0.0966391
1.11443	1.20155	0.54402	0.844101	0.489479	0.310121	0.18513	0.5203	1.06032	0.744049	0.815328	0.268451		0.674773	0.0986951
1.14235	1.23289	0.563456	0.868333	0.503351	0.326592	0.193839	0.534146	1.085	0.772036	0.833005	0.277363		0.694363	0.100671
1.17047	1.26456	0.582851	0.89259	0.51726	0.34386	0.202985	0.548	1.10936	0.800479	0.850949	0.287109		0.714205	0.102608
1.1985	1.29624	0.602012	0.916592	0.531232	0.361972	0.212375	0.561783	1.13373	0.82963	0.869178	0.298046		0.734274	0.104489
1.22602	1.32768	0.62106	0.940447	0.545441	0.381009	0.222266	0.575579	1.1579	0.859318	0.887822	0.310274		0.754569	0.106265
1.2529	1.3595	0.640538	0.964658	0.560031	0.400975	0.232788	0.589307	1.18165	0.889425	0.906759	0.322432		0.77508	0.107987
1.2796	1.39212	0.660782	0.989016	0.574752	0.421871	0.243681	0.602962	1.2051	0.920334	0.925635	0.33443		0.795857	0.109706
1.30612	1.42531	0.680822	1.01339	0.589709	0.443204	0.254958	0.616606	1.2278	0.952132	0.944509	0.346589		0.816763	0.111409
1.332	1.45901	0.700596	1.03794	0.6045	0.464713	0.266524	0.630121	1.24979	0.984159	0.963548	0.358713		0.837634	0.113104
1.35742	1.49385	0.720585	1.06254	0.619019	0.486022	0.27855	0.643525	1.27129	1.01563	0.982231	0.370656		0.858443	0.114821
1.38261	1.5292	0.740743	1.08724	0.633447	0.507091	0.291074	0.656845	1.29222	1.04692	1.00042	0.382602		0.879202	0.116534
1.40758	1.56454	0.76107	1.1121	0.64734	0.528234	0.304035	0.670102	1.31273	1.07849	1.01847	0.394506		0.899932	0.118237
1.43188	1.59992	0.781658	1.13708	0.660823	0.549278	0.317345	0.683282	1.33295	1.11017	1.03614	0.406323		0.920571	0.119926
1.4551	1.63532	0.802662	1.16232	0.674079	0.570289	0.330753	0.696389	1.35272	1.1419	1.05344	0.418471		0.94112	0.121573
1.47767	1.67156	0.823891	1.18796	0.687223	0.591285	0.344549	0.709576	1.37186	1.17362	1.07058	0.430771		0.961711	0.12322
1.50016	1.70873	0.845204	1.21366	0.70025	0.612204	0.358609	0.72282	1.39034	1.20555	1.0875	0.44291		0.982328	0.124906
1.52276	1.74628	0.866125	1.23909	0.713069	0.633029	0.372772	0.736211	1.40819	1.23766	1.10413	0.454855		1.00285	0.12662
1.54521	1.78394	0.886624	1.2645	0.725688	0.653831	0.387306	0.750017	1.42585	1.26954	1.12054	0.466655		1.02331	0.128336
1.56729	1.82182	0.907358	1.28975	0.737903	0.674883	0.402127	0.764105	1.44371	1.30133	1.13691	0.478673		1.04382	0.130047
1.58919	1.85966	0.928032	1.31447	0.750162	0.696353	0.417268	0.778266	1.46162	1.33379	1.15264	0.490779		1.06435	0.131743
1.61054	1.89723	0.948346	1.33879	0.762616	0.71824	0.432561	0.792338	1.47941	1.36713	1.16774	0.502613		1.0848	0.133426
1.63101	1.9354	0.968504	1.36269	0.775182	0.740069	0.447943	0.806232	1.49691	1.40115	1.18267	0.514773		1.10521	0.135118
1.6505	1.97446	0.988407	1.38632	0.788174	0.761805	0.463648	0.82001	1.51418	1.43534	1.19694	0.527724		1.12563	0.136796
1.66928	2.0147	1.00784	1.40986	0.801552	0.783858	0.47975	0.833469	1.53137	1.46925	1.21087	0.540489		1.14602	0.138509
1.68853	2.05584	1.02701	1.43309	0.815165	0.806204	0.496475	0.846548	1.54874	1.50334	1.22473	0.552571		1.16652	0.140303
1.70841	2.09697	1.04615	1.4562	0.828849	0.828714	0.513691	0.859323	1.56644	1.53738	1.238	0.564722		1.18707	0.14212
1.72833	2.13862	1.06542	1.47937	0.842846	0.851419	0.53138	0.871687	1.58469	1.57074	1.25072	0.577567		1.20773	0.143941
1.7479	2.181	1.08509	1.50226	0.857207	0.874327	0.549658	0.88355	1.60361	1.60348	1.2632	0.591045		1.22853	0.145762
1.76681	2.22326	1.10503	1.52477	0.87197	0.897066	0.56848	0.89484	1.62231	1.6357	1.27476	0.604415		1.24912	0.147548
1.78534	2.26485	1.12508	1.54715	0.887428	0.919431	0.588122	0.905697	1.64051	1.66778	1.28478	0.6174		1.26946	0.149282
1.80354	2.3068	1.14514	1.56961	0.903343	0.941434	0.608422	0.916322	1.6586	1.69986	1.29461	0.630234		1.28983	0.151035
1.82189	2.34964	1.16518	1.59208	0.919736	0.963398	0.629212	0.926884	1.67669	1.73223	1.30491	0.643388		1.31044	0.152833
1.84081	2.39179	1.18532	1.61439	0.936737	0.985717	0.650446	0.937383	1.69506	1.76454	1.3155	0.657046		1.33123	0.154587
1.86055	2.4331	1.20558	1.63651	0.954328	1.00795	0.671861	0.947858	1.71348	1.79626	1.32677	0.671093		1.35211	0.156295
1.88149	2.47371	1.22605	1.65859	0.972385	1.02961	0.693615	0.958547	1.73184	1.82807	1.33813	0.686102		1.37318	0.157968
1.90257	2.51363	1.24685	1.68082	0.990911	1.05068	0.715879	0.969303	1.75007	1.86001	1.34932	0.701748		1.39431	0.159589
1.92337	2.5536	1.26804	1.70309	1.01005	1.0711	0.738796	0.980213	1.76805	1.89227	1.36106	0.717208		1.41557	0.161204
1.94389	2.5932	1.28945	1.72525	1.02958	1.09078	0.762348	0.991447	1.78575	1.92529	1.37342	0.731955		1.43686	0.162819
1.96401	2.63228	1.31099	1.74732	1.04965	1.10997	0.786334	1.00287	1.80285	1.9591	1.38616	0.745769		1.45811	0.16443
1.98493	2.6707	1.33262	1.7692	1.07009	1.12897	0.810678	1.01453	1.81991	1.99403	1.39997	0.759742		1.47961	0.166035
2.0071	2.70846	1.35424	1.79075	1.09058	1.1476	0.835258	1.02634	1.83732	2.02931	1.41517	0.774145		1.50136	0.167634
2.03044	2.74628	1.37629	1.81215	1.11124	1.16581	0.860306	1.0383	1.85476	2.06433	1.43056	0.788729		1.52327	0.169247
2.05485	2.7842	1.39886	1.83349	1.13187	1.18372	0.885921	1.05029	1.87219	2.09916	1.44589	0.804085		1.54538	0.170857
2.07991	2.82265	1.4216	1.85443	1.1525	1.20147	0.911909	1.06196	1.88965	2.13392	1.46153	0.819736		1.56761	0.172507
2.10563	2.86188	1.44442	1.87485	1.17321	1.21911	0.938507	1.07338	1.90722	2.16933	1.47715	0.834867		1.58996	0.174245
2.13172	2.90164	1.46726	1.89499	1.19391	1.23664	0.965526	1.08469	1.92487	2.20524	1.49278	0.850237		1.61246	0.176032
2.15827	2.94156	1.49023	1.91476	1.21448	1.2543	0.992523	1.09586	1.94258	2.2411	1.50851	0.866699		1.63507	0.177815
2.18555	2.98126	1.51354	1.93395	1.2349	1.27227	1.01968	1.10686	1.9605	2.27696	1.52434	0.883534		1.65778	0.179596
2.2138	3.02142	1.53724	1.95268	1.25514	1.29049	1.04719	1.11767	1.97884	2.31272	1.54021	0.900666		1.68067	0.181419
2.24325	3.06211	1.56123	1.97113	1.27501	1.30874	1.07503	1.1283	1.99767	2.34821	1.55586	0.918804		1.70378	0.183279
2.2728	3.10408	1.58576	1.98963	1.29485	1.32688	1.10313	1.13862	2.01684	2.3835	1.57136	0.936824		1.72702	0.185232
2.30175	3.14757	1.61114	2.00809	1.31467	1.34527	1.13156	1.14875	2.03622	2.41879	1.58703	0.954251		1.75042	0.187281
2.33006	3.19062	1.63715	2.02605	1.33426	1.36395	1.16035	1.15868	2.05572	2.45389	1.60314	0.971569		1.77379	0.18929
2.35775	3.23282	1.66344	2.04368	1.35377	1.38265	1.18944	1.16854	2.0753	2.4885	1.61945	0.98803		1.79695	0.191258
2.38526	3.27477	1.6902	2.06129	1.37284	1.40138	1.21905	1.1788	2.0946	2.5231	1.63557	1.00455		1.82012	0.193202
2.41253	3.31655	1.71776	2.07873	1.39142	1.42005	1.24891	1.18927	2.11363	2.55771	1.65185	1.02218		1.84338	0.195099
2.43978	3.35782	1.74592	2.09568	1.40975	1.43885	1.27889	1.19986	2.13259	2.59193	1.66875	1.03995		1.86665	0.196952
2.46701	3.39912	1.77438	2.11213	1.42796	1.45763	1.30932	1.21067	2.15117	2.62586	1.68633	1.05744		1.88992	0.198794
2.49403	3.44069	1.80289	2.12832	1.44622	1.47616	1.33996	1.22159	2.16953	2.65909	1.70431	1.07521		1.91317	0.200623
2.52106	3.4812	1.83108	2.14421	1.46461	1.49478	1.37068	1.23267	2.18793	2.69166	1.72273	1.09406		1.93639	0.20234
2.5477	3.52127	1.85914	2.15965	1.48315	1.51346	1.40164	1.24385	2.20652	2.72404	1.74189	1.11423		1.95971	0.203973
2.57411	3.56148	1.8872	2.17446	1.50163	1.53225	1.43289	1.25512	2.22533	2.75627	1.76181	1.13584		1.9832	0.205556
2.60033	3.60142	1.91498	2.18878	1.5201	1.55116	1.46432	1.26652	2.24431	2.78831	1.7824	1.15866		2.00678	0.207077
2.6257	3.64207	1.94276	2.20269	1.53856	1.57025	1.49574	1.27802	2.26358	2.8205	1.80345	1.18237		2.03047	0.208605
2.6502	3.68294	1.97074	2.21604	1.55694	1.58967	1.52733	1.28945	2.28316	2.85261	1.82497	1.20723		2.05427	0.210095
2.67409	3.72267	1.99874	2.22907	1.57558	1.60918	1.55884	1.30037	2.30349	2.8837	1.84719	1.23246		2.07795	0.211488
2.69773	3.76106	2.02689	2.24189	1.59452	1.62902	1.5901	1.31089	2.3246	2.91423	1.86984	1.25746		2.10152	0.212812
2.72117	3.79859	2.05538	2.25443	1.61368	1.64915	1.62157	1.32128	2.34633	2.94482	1.89236	1.28207		2.12507	0.214104
2.7443	3.83596	2.08428	2.26681	1.63304	1.66945	1.65326	1.33145	2.36887	2.9754	1.91444	1.30655		2.14865	0.215404
2.76716	3.87358	2.11369	2.27893	1.6525	1.69024	1.68477	1.34147	2.39192	3.0065	1.93629	1.33154		2.17238	0.216729
2.78994	3.9119	2.14371	2.29088	1.67205	1.7114	1.71608	1.35139	2.41531	3.03795	1.9583	1.3562		2.19626	0.218129
2.81301	3.95048	2.17413	2.30281	1.69167	1.73285	1.74735	1.36099	2.43899	3.06902	1.98016	1.38023		2.22014	0.219581
2.83622	3.98897	2.20481	2.31445	1.71111	1.7546	1.77858	1.37032	2.46293	3.09963	2.00175	1.40382		2.24393	0.221054
2.86011	4.02764	2.23583	2.32577	1.73027	1.77655	1.80974	1.37946	2.48727	3.13016	2.02326	1.42658		2.26772	0.222601
2.88558	4.06597	2.26687	2.33707	1.74942	1.79881	1.84078	1.38845	2.5118	3.16063	2.04498	1.44899		2.29161	0.224183
2.91229	4.10441	2.29789	2.34847	1.76856	1.82141	1.87171	1.39746	2.53637	3.19126	2.06723	1.47096		2.31567	0.225822
2.93971	4.14356	2.32916	2.35986	1.7876	1.84431	1.9027	1.40669	2.56104	3.22244	2.09015	1.49226		2.33996	0.227549
2.96752	4.18324	2.3604	2.3713	1.80678	1.86747	1.93393	1.41611	2.58587	3.25367	2.11381	1.51357		2.36447	0.229311
2.99528	4.22412	2.3916	2.38269	1.826	1.89099	1.96504	1.42545	2.61081	3.28457	2.13817	1.53516		2.38916	0.231131
3.02264	4.2651	2.4225	2.39408	1.84504	1.91489	1.99589	1.43482	2.63578	3.31506	2.16345	1.55643		2.41381	0.232952
3.04909	4.30529	2.45269	2.40558	1.8639	1.93885	2.02689	1.44413	2.6608	3.34522	2.18941	1.57732		2.43826	0.234719
3.07477	4.34539	2.48273	2.41706	1.88281	1.96277	2.05789	1.45334	2.686	3.3754	2.2155	1.59854		2.46268	0.236471
3.10063	4.38533	2.5129	2.42844	1.90188	1.98689	2.08871	1.46276	2.71155	3.40586	2.24195	1.61997		2.48724	0.238223
3.12699	4.42478	2.54302	2.43976	1.92112	2.01123	2.11945	1.47233	2.7374	3.43644	2.26906	1.64187		2.51195	0.239943
3.15348	4.46372	2.57308	2.45112	1.94054	2.03562	2.15011	1.48204	2.76344	3.46657	2.29655	1.66482		2.53676	0.241595
3.17995	4.50254	2.60338	2.46255	1.9602	2.05981	2.18065	1.49186	2.78981	3.49619	2.32408	1.68831		2.56161	0.243221
3.20628	4.54119	2.63379	2.47401	1.98016	2.08368	2.21104	1.50182	2.81654	3.52576	2.3513	1.71213		2.58647	0.244837
3.23248	4.58	2.66398	2.48555	2.00043	2.10727	2.24145	1.51202	2.84337	3.55526	2.37809	1.73604		2.61133	0.24646
3.25874	4.61942	2.69436	2.49712	2.02092	2.13094	2.27157	1.52227	2.87034	3.58449	2.40491	1.75983		2.63624	0.248125
3.28527	4.65871	2.72512	2.50877	2.04135	2.15458	2.30152	1.53271	2.89762	3.61372	2.4319	1.78343		2.66123	0.2498
3.31256	4.69797	2.75636	2.52049	2.06197	2.17802	2.33148	1.54341	2.92539	3.64322	2.45894	1.8063		2.68634	0.25152
3.34073	4.73774	2.78832	2.53229	2.08274	2.20167	2.36104	1.55422	2.95367	3.67241	2.48618	1.82836		2.71161	0.253306
3.36913	4.77777	2.8206	2.54416	2.10293	2.22561	2.39036	1.56512	2.98213	3.70076	2.51371	1.8494		2.73681	0.255131
3.39733	4.81772	2.85273	2.55614	2.12256	2.24966	2.41938	1.57621	3.01046	3.72848	2.5412	1.86931		2.76176	0.256972
3.42546	4.8581	2.88483	2.56851	2.14216	2.27388	2.44803	1.58741	3.03853	3.75602	2.56848	1.88817		2.78663	0.258863
3.45377	4.89917	2.9172	2.58116	2.16195	2.29843	2.47645	1.59816	3.06619	3.7837	2.59609	1.90598		2.81152	0.260843
3.48226	4.94043	2.94973	2.59398	2.18174	2.32341	2.50428	1.60859	3.09354	3.81096	2.62391	1.92307		2.83633	0.262858
3.51106	4.98226	2.98234	2.60695	2.20112	2.34891	2.53168	1.61901	3.12065	3.83746	2.65203	1.94002		2.86112	0.264904
3.53988	5.02486	3.01487	2.61992	2.22001	2.37498	2.55895	1.62911	3.14786	3.86392	2.68067	1.95732		2.88603	0.267007
3.56804	5.06807	3.04703	2.63296	2.23863	2.40121	2.58616	1.63896	3.17529	3.89046	2.70929	1.97489		2.91092	0.269149
3.59587	5.11177	3.07898	2.64611	2.25718	2.42746	2.61309	1.64882	3.2025	3.91656	2.73789	1.99309		2.93578	0.271294
3.62408	5.15532	3.11104	2.65932	2.27565	2.45381	2.63971	1.65877	3.22947	3.94241	2.76636	2.01282		2.96073	0.273396
3.65287	5.19817	3.1432	2.67255	2.29414	2.47999	2.6664	1.66895	3.25648	3.96873	2.79453	2.03356		2.9858	0.275455
3.68218	5.24057	3.17528	2.68584	2.31316	2.50593	2.69309	1.67947	3.28377	3.99566	2.82234	2.0546		3.01099	0.277496
3.71177	5.28326	3.20755	2.69935	2.33267	2.53177	2.71991	1.69011	3.31161	4.02313	2.84993	2.07565		3.03639	0.279571
3.74124	5.32572	3.24035	2.71303	2.35231	2.55755	2.74658	1.70082	3.34019	4.05086	2.8775	2.09657		3.06189	0.281651
3.7705	5.36707	3.27317	2.72681	2.37196	2.58337	2.7731	1.71205	3.36949	4.07817	2.90468	2.11806		3.08737	0.283625
3.79965	5.4078	3.30587	2.74067	2.39155	2.6092	2.80005	1.7238	3.39936	4.10556	2.93176	2.14035		3.11297	0.28553
3.82858	5.44862	3.33893	2.75463	2.41128	2.63511	2.8269	1.73572	3.42994	4.13352	2.95877	2.16294		3.13874	0.287447
3.85776	5.48888	3.37262	2.76869	2.43112	2.66089	2.85331	1.74811	3.46077	4.16147	2.98527	2.18549		3.16453	0.289332
3.88754	5.52763	3.40675	2.78274	2.45068	2.68585	2.87964	1.76088	3.49136	4.1894	3.01099	2.20783		3.19011	0.291154
3.91759	5.56548	3.44089	2.79688	2.47005	2.71057	2.90595	1.77321	3.52235	4.21741	3.03627	2.22986		3.21554	0.292969
3.94763	5.60344	3.47474	2.81114	2.48948	2.73558	2.9322	1.78506	3.55364	4.24504	3.0617	2.25161		3.24094	0.294805
3.9776	5.64181	3.50858	2.8255	2.50899	2.76067	2.95815	1.79672	3.58473	4.27183	3.08721	2.27343		3.26627	0.29665
4.00726	5.68027	3.54281	2.84	2.52854	2.78611	2.98355	1.80829	3.6156	4.29798	3.11318	2.29599		3.29163	0.298464
4.03637	5.71818	3.57725	2.8545	2.54807	2.81158	3.00838	1.81985	3.64617	4.32371	3.13984	2.31988		3.31698	0.300197
4.06565	5.75553	3.61187	2.86913	2.56768	2.83683	3.03286	1.83151	3.67676	4.34945	3.16667	2.34471		3.34239	0.301881
4.09514	5.79244	3.6466	2.88387	2.58727	2.86179	3.05687	1.84323	3.70754	4.37582	3.19348	2.36923		3.36777	0.303579
4.12476	5.8292	3.6815	2.89855	2.60675	2.88655	3.08047	1.85441	3.73841	4.40277	3.22063	2.39293		3.39308	0.30534
4.15468	5.86604	3.71655	2.91316	2.62614	2.91128	3.10398	1.86495	3.76943	4.42995	3.24793	2.41577		3.41832	0.307173
4.18454	5.90315	3.75153	2.92787	2.64557	2.93612	3.12739	1.87534	3.8006	4.45703	3.2754	2.43799		3.44354	0.309043
4.21466	5.94135	3.78687	2.94297	2.6654	2.9619	3.15064	1.88598	3.83231	4.48434	3.30371	2.45995		3.46917	0.310972
4.24401	5.97965	3.82214	2.95818	2.68546	2.98793	3.17344	1.89709	3.86421	4.51197	3.3321	2.48104		3.49477	0.312906
4.27227	6.01763	3.85783	2.97351	2.70546	3.01417	3.1957	1.90879	3.89645	4.54017	3.36062	2.50145		3.52034	0.314819
4.30039	6.05608	3.89368	2.98896	2.72524	3.04075	3.21759	1.92065	3.92902	4.56913	3.3892	2.52151		3.54602	0.31679
4.32893	6.09458	3.92921	3.00442	2.74495	3.06712	3.23959	1.93248	3.96175	4.59871	3.41749	2.54123		3.5717	0.318804
4.35809	6.13305	3.96511	3.02002	2.76446	3.09375	3.26186	1.9445	3.99491	4.62861	3.44606	2.56061		3.59759	0.320843
4.38666	6.17164	4.00046	3.03516	2.78311	3.12025	3.28399	1.95638	4.02762	4.65769	3.47434	2.57927		3.62305	0.322904
4.41561	6.21192	4.03656	3.05061	2.80152	3.14754	3.30653	1.96861	4.06058	4.68691	3.50307	2.59814		3.64897	0.325057
4.44427	6.25256	4.07243	3.06625	2.81957	3.17478	3.32849	1.98131	4.09319	4.71573	3.53127	2.61651		3.6747	0.327222
4.47292	6.29231	4.10859	3.08223	2.83796	3.20205	3.34995	1.99495	4.12591	4.74418	3.55947	2.63582		3.70053	0.329264
4.50182	6.33068	4.14526	3.09847	2.85668	3.22944	3.37095	2.009	4.15899	4.77258	3.58786	2.65612		3.72649	0.331192
4.53011	6.36775	4.18099	3.11436	2.87498	3.2558	3.39099	2.02272	4.19124	4.80037	3.6152	2.6759		3.7517	0.333065
4.56085	6.40658	4.21893	3.13128	2.89409	3.28326	3.41194	2.03741	4.22418	4.82964	3.64377	2.69812		3.77834	0.335002
4.59092	6.44341	4.25495	3.14737	2.9119	3.30907	3.43207	2.05141	4.2546	4.85749	3.67073	2.72012		3.80367	0.336835
4.6229	6.48164	4.29303	3.16455	2.93055	3.33589	3.45311	2.06637	4.28622	4.88694	3.69903	2.74362		3.83032	0.338729
4.6541	6.51873	4.33052	3.18135	2.94848	3.36213	3.47334	2.08107	4.31694	4.91552	3.72664	2.76637		3.85627	0.340575
4.68393	6.55429	4.36633	3.19755	2.96554	3.38719	3.49234	2.09511	4.34596	4.94301	3.75258	2.7879		3.88098	0.342358
4.72041	6.59628	4.40986	3.21787	2.987	3.41728	3.51467	2.11246	4.38071	4.9769	3.78364	2.81524		3.91103	0.344416
4.74303	6.62178	4.43683	3.23059	3.00049	3.43579	3.52825	2.12328	4.40209	4.99792	3.80279	2.8326		3.92962	0.345648
