# Supplementary material for: How spatial release from masking may fail to function in a highly directional auditory system
Source: eLife. 2017 Apr 25;6:e20731. doi: 10.7554/eLife.20731 (PMC5443663; doi:10.7554/eLife.20731)
Supplement: Figure 5—source data 6. — The target signal was presented at 76 dB SPL from a forward speaker while the masker was presented at the same intensity from a lateral speaker to the left. ‘X’ and ‘Y’ coordinates of virtual walking paths measured from the treadmill system. Data plotted in Figure 5F. DOI: http://dx.doi.org/10.7554/eLife.20731.022 [file elife-20731-fig5-data6.xlsx]

## Sheet: noise minus 90 x
fly1	fly2	fly3	fly4	fly5	fly6	fly7	fly8	fly9	fly10	fly11	fly12		Avg	SEM
2.94727e-07	-6.01487e-07	1.88465e-06	-6.0329e-07	-1.99943e-07	-2.59971e-08	-0.000206714	2.20237e-07	-1.94996e-06	-2.70572e-07	2.61442e-08	3.47392e-07		-1.72993e-05	1.72213e-05
5.7352e-08	3.52274e-07	-1.85016e-06	3.54434e-08	2.35174e-07	2.79183e-07	-0.000252617	4.49712e-07	1.32862e-06	2.83227e-07	1.02178e-07	-7.02796e-07		-2.10039e-05	2.10569e-05
-4.65538e-07	1.42314e-07	1.40745e-06	7.45907e-07	-2.04068e-07	-5.12627e-07	-0.000246925	-2.89449e-06	-2.74345e-06	-2.02146e-07	-2.43766e-07	9.7686e-07		-2.09099e-05	2.05503e-05
9.01406e-07	-7.43627e-07	-4.10188e-07	-1.30769e-06	8.77674e-08	6.47713e-07	-0.000248798	6.19424e-07	-6.42451e-08	1.4936e-08	3.83056e-07	-8.69381e-07		-2.07949e-05	2.07285e-05
-1.09708e-06	1.31845e-06	-2.06425e-06	2.10351e-06	1.09966e-07	-4.91515e-07	-0.000251906	-6.8611e-06	-1.51832e-06	2.59252e-07	-4.44271e-07	6.11683e-07		-2.1665e-05	2.09411e-05
1.5438e-06	-1.48427e-06	2.75794e-06	-3.96343e-06	-3.56027e-07	3.25917e-07	-0.000250679	-2.14932e-06	-5.25345e-06	-5.42385e-07	4.81749e-07	-9.6411e-07		-2.16902e-05	2.08269e-05
-2.00529e-06	1.64122e-06	-7.96904e-06	1.20334e-07	5.82376e-07	-5.93317e-07	-0.000256059	-1.23583e-05	6.22747e-05	7.61774e-07	-1.59508e-07	-2.48166e-06		-1.80205e-05	2.23231e-05
-1.76392e-06	-2.18218e-06	3.75261e-06	-6.81697e-06	-6.90468e-07	-1.28294e-06	-0.000257856	5.58301e-05	0.000175206	-7.94672e-07	-5.16627e-07	-1.68013e-06		-3.23286e-06	2.75588e-05
-4.54381e-06	-1.07852e-06	-1.69273e-05	-7.11723e-06	6.28263e-07	-1.28651e-06	-0.000213971	0.000278166	0.000293451	7.11249e-07	2.5286e-08	-7.4035e-06		2.67211e-05	3.90339e-05
-1.01921e-05	-2.78748e-06	2.39257e-05	-1.19712e-05	-3.03885e-07	-4.7379e-06	-6.35611e-05	0.000586361	0.00039117	-3.91774e-07	-3.28011e-06	-6.2714e-06		7.483e-05	5.73783e-05
-7.98187e-06	-9.26708e-06	0.000153876	-9.24944e-06	-1.34906e-07	-5.03816e-06	0.000393933	0.00108339	0.000552522	-9.29001e-07	-2.15066e-06	7.76399e-06		0.000179728	9.811e-05
-2.69324e-05	-7.576e-06	0.00028212	0.000256543	8.84328e-07	-5.32106e-06	0.00111556	0.00171761	0.000847198	1.64716e-07	-1.03666e-05	0.000168934		0.000361568	0.000163264
0.000123994	-1.78155e-05	0.000589445	0.000748835	-1.81466e-06	9.97005e-05	0.00197718	0.00265542	0.00124822	-4.12864e-06	-1.01846e-05	0.000508389		0.000659769	0.000253571
0.000609733	0.000154616	0.00113839	0.00139241	8.5806e-07	0.000311017	0.00312139	0.00406251	0.00187894	3.73878e-07	5.00896e-05	0.000950482		0.00113923	0.000377756
0.00139261	0.000511126	0.00207478	0.00236022	-5.20124e-06	0.000564971	0.00470223	0.00577182	0.00275638	-9.4943e-06	0.00021652	0.00157323		0.00182577	0.00053611
0.00245736	0.000994655	0.00348393	0.00375531	-2.64932e-06	0.00105415	0.00678688	0.00804531	0.00388574	2.0905e-05	0.000533915	0.00237139		0.00278224	0.000745114
0.00380832	0.00193164	0.00548337	0.00571075	-1.00509e-05	0.00181842	0.00934666	0.0110211	0.00530677	0.000129477	0.00113891	0.00334577		0.00408593	0.00100521
0.00559279	0.0034344	0.00822314	0.00823688	-1.0303e-05	0.00283758	0.0124415	0.0148094	0.00709827	0.000300771	0.00227849	0.00443277		0.00580631	0.00132419
0.00789231	0.00552869	0.0116026	0.0114131	7.29685e-05	0.00418924	0.0161796	0.0195503	0.00940545	0.00056867	0.00404958	0.00577851		0.00801926	0.0017104
0.0106823	0.00834058	0.0158537	0.0153084	0.000286046	0.00588159	0.0205817	0.0251745	0.0122739	0.000890659	0.00650431	0.00760417		0.0107818	0.00216375
0.0139832	0.0119205	0.0209433	0.0200075	0.000764536	0.00807617	0.0255967	0.0318248	0.0158865	0.00131965	0.00979468	0.00986634		0.0141653	0.00268257
0.0178726	0.0161459	0.0269323	0.0254811	0.00148002	0.010835	0.0311514	0.0395138	0.0201919	0.00186614	0.0141563	0.0128857		0.0182093	0.00326223
0.0224172	0.0210889	0.0340574	0.0314717	0.00244896	0.0141733	0.0373133	0.0482858	0.0251309	0.0024817	0.0197413	0.01674		0.0229459	0.00390982
0.0275482	0.0270593	0.0421583	0.0382175	0.00386658	0.0180767	0.0441866	0.0580855	0.0308276	0.00318953	0.0265183	0.0214839		0.0284348	0.00462202
0.0333133	0.0338922	0.0512408	0.0458267	0.00576807	0.0224641	0.0517144	0.0688746	0.0371574	0.00405286	0.0346209	0.0273548		0.03469	0.00539598
0.0397103	0.0417176	0.0612555	0.054088	0.00825176	0.0273778	0.0597989	0.0806732	0.044265	0.00527694	0.0441014	0.0343217		0.0417365	0.00621803
0.0467132	0.0507549	0.0722853	0.0627626	0.0113411	0.0325999	0.0684434	0.0931473	0.052363	0.00680921	0.0548146	0.0425024		0.0495447	0.00708068
0.0543078	0.0606922	0.0840299	0.0717562	0.0150513	0.038136	0.0777223	0.106215	0.0613207	0.00869294	0.0666851	0.0519618		0.0580476	0.00797468
0.0623812	0.0715002	0.0961198	0.0812963	0.0196457	0.0440781	0.0877195	0.119744	0.0709828	0.0111175	0.0796028	0.0630978		0.0672738	0.00886979
0.0709036	0.0833331	0.108968	0.0913061	0.0252846	0.0502593	0.0983407	0.13361	0.081449	0.0140053	0.0934192	0.0757886		0.0772223	0.00977478
0.0798384	0.0962641	0.122658	0.101728	0.0319554	0.0567775	0.10962	0.148161	0.0927653	0.0174488	0.108055	0.0895891		0.0879051	0.0107068
0.0894535	0.11019	0.137191	0.112647	0.0396789	0.0634673	0.121702	0.163616	0.10477	0.0214925	0.12341	0.104448		0.0993388	0.0116769
0.100002	0.125313	0.152567	0.124258	0.0485154	0.0701891	0.134522	0.179984	0.117642	0.0262009	0.139225	0.119823		0.11152	0.0126783
0.111383	0.141696	0.168608	0.136705	0.0585962	0.0771349	0.148045	0.197088	0.131413	0.0317116	0.155456	0.135518		0.124446	0.0136818
0.123483	0.15903	0.185338	0.149847	0.0698335	0.084322	0.162223	0.214632	0.146005	0.0380809	0.172092	0.151188		0.138006	0.0146695
0.136152	0.177418	0.202656	0.163723	0.0819177	0.0917355	0.177142	0.232492	0.161481	0.0453838	0.189006	0.166244		0.152113	0.015639
0.149457	0.196613	0.220564	0.178428	0.0950443	0.0993203	0.192784	0.250879	0.177594	0.0533628	0.206212	0.18101		0.166772	0.0166064
0.163672	0.216584	0.239004	0.194199	0.109107	0.107122	0.209122	0.270049	0.194296	0.0619883	0.223781	0.196167		0.182091	0.0175894
0.178776	0.237451	0.258156	0.21104	0.123862	0.115238	0.226214	0.289826	0.211536	0.0713225	0.242078	0.211648		0.198096	0.0185962
0.194554	0.259041	0.278236	0.228679	0.13964	0.123634	0.243875	0.310242	0.229368	0.0812188	0.2613	0.226944		0.214728	0.01963
0.211094	0.281265	0.298735	0.247219	0.15632	0.132394	0.262058	0.331419	0.247971	0.0919086	0.281609	0.242142		0.232011	0.0206761
0.228287	0.30363	0.319534	0.266607	0.173719	0.141546	0.280617	0.353023	0.267209	0.103309	0.303199	0.257309		0.249832	0.0217228
0.245557	0.326302	0.34067	0.286683	0.19175	0.151179	0.299569	0.374971	0.287013	0.115218	0.325975	0.272436		0.26811	0.0227832
0.262825	0.349496	0.362091	0.307422	0.210397	0.161446	0.318672	0.397169	0.3072	0.127712	0.350235	0.287574		0.286853	0.0238521
0.28023	0.372712	0.383807	0.328712	0.229605	0.172105	0.337505	0.419601	0.327823	0.140676	0.375845	0.303021		0.30597	0.0249304
0.297566	0.395868	0.405532	0.350471	0.24944	0.183061	0.356324	0.442637	0.349006	0.154034	0.402636	0.319407		0.325499	0.0260312
0.314854	0.41908	0.427172	0.372717	0.270276	0.19447	0.375264	0.466375	0.370729	0.167747	0.430984	0.336703		0.345531	0.0271566
0.332194	0.442461	0.448456	0.395418	0.291745	0.206245	0.394269	0.490762	0.393055	0.18205	0.460851	0.354343		0.365988	0.0283052
0.349389	0.466072	0.469361	0.418508	0.313944	0.218322	0.413061	0.515632	0.415791	0.196984	0.492135	0.371985		0.386765	0.029474
0.366355	0.490191	0.490003	0.442139	0.337164	0.230758	0.431697	0.541022	0.439139	0.212282	0.524421	0.389662		0.407903	0.0306784
0.382978	0.51484	0.510384	0.466175	0.360843	0.243614	0.450549	0.566893	0.463062	0.228126	0.557462	0.407521		0.429371	0.0319157
0.399184	0.539795	0.530635	0.490575	0.384938	0.256783	0.46964	0.592778	0.487118	0.244475	0.591178	0.426078		0.451098	0.0331706
0.415418	0.565403	0.550846	0.51569	0.409546	0.270121	0.488968	0.618631	0.511406	0.261231	0.625393	0.445187		0.473153	0.0344551
0.431858	0.591548	0.571327	0.541282	0.434551	0.283683	0.508355	0.644521	0.536052	0.27844	0.660281	0.463818		0.495476	0.0357804
0.448048	0.617976	0.592035	0.567308	0.46003	0.297432	0.528141	0.670395	0.561082	0.295997	0.695586	0.481998		0.518002	0.0371436
0.463799	0.64493	0.613061	0.593995	0.485916	0.311444	0.54868	0.695935	0.586369	0.314078	0.731494	0.499972		0.540806	0.0385416
0.479222	0.672471	0.634236	0.621211	0.512042	0.325829	0.569622	0.720958	0.611738	0.332686	0.767802	0.517253		0.563756	0.039958
0.494234	0.700557	0.655283	0.648922	0.538469	0.340566	0.590702	0.745658	0.637293	0.351714	0.803526	0.534006		0.586744	0.0413639
0.508797	0.729113	0.67676	0.677088	0.565374	0.355851	0.612105	0.769816	0.663056	0.371131	0.838982	0.550702		0.609898	0.0427589
0.523054	0.757464	0.698633	0.705716	0.592816	0.371748	0.634078	0.793641	0.688998	0.390797	0.874431	0.566589		0.633164	0.0441541
0.537319	0.784957	0.72064	0.734679	0.620624	0.388166	0.65626	0.8173	0.715021	0.410605	0.909595	0.581395		0.65638	0.0455326
0.551855	0.811878	0.742838	0.763969	0.648796	0.405028	0.678391	0.840614	0.741051	0.430397	0.944791	0.596111		0.679643	0.046902
0.566504	0.838547	0.765531	0.793561	0.677551	0.422385	0.700558	0.864075	0.767146	0.450353	0.980389	0.610659		0.703105	0.0482948
0.581085	0.865167	0.788608	0.823244	0.706972	0.440343	0.722783	0.887663	0.793399	0.47064	1.01636	0.624782		0.726754	0.0497076
0.595648	0.891869	0.811537	0.853062	0.73725	0.458678	0.745059	0.91093	0.819749	0.491253	1.05272	0.639254		0.750584	0.0511259
0.610398	0.918725	0.834428	0.882477	0.76813	0.477349	0.767143	0.934092	0.845965	0.512178	1.0894	0.65466		0.774579	0.0525335
0.625486	0.94599	0.857274	0.911205	0.799542	0.496315	0.788659	0.957645	0.872109	0.533184	1.12592	0.670331		0.798638	0.0539378
0.640884	0.973047	0.880139	0.939752	0.831701	0.515355	0.809592	0.981266	0.898009	0.554415	1.16265	0.686037		0.822737	0.0553506
0.656708	0.999581	0.903146	0.968319	0.864083	0.534458	0.830303	1.00472	0.92353	0.575849	1.20046	0.702165		0.846944	0.0567946
0.672797	1.02626	0.926347	0.99687	0.896683	0.553622	0.85084	1.02859	0.948997	0.597222	1.23897	0.71753		0.871227	0.0583171
0.688763	1.05352	0.949999	1.02533	0.929747	0.572765	0.871248	1.0525	0.974425	0.618613	1.27758	0.732472		0.895581	0.0598969
0.704694	1.08152	0.974266	1.05354	0.963092	0.591688	0.891734	1.07624	0.999814	0.640198	1.31667	0.748244		0.920142	0.0615203
0.720659	1.10997	0.999144	1.08099	0.996678	0.610615	0.912151	1.10018	1.02511	0.662037	1.35611	0.764167		0.944818	0.0631744
0.736621	1.13844	1.02426	1.10756	1.0304	0.629441	0.932271	1.12412	1.05031	0.683606	1.39495	0.78005		0.969337	0.0648216
0.752595	1.16667	1.04966	1.13388	1.06413	0.647705	0.951951	1.14805	1.07548	0.704903	1.43308	0.796161		0.993689	0.0664715
0.768555	1.19465	1.07551	1.16046	1.09785	0.665649	0.971382	1.17151	1.10058	0.726101	1.4709	0.812666		1.01798	0.0681245
0.78462	1.22237	1.10164	1.18744	1.13174	0.683289	0.991006	1.19444	1.12573	0.74711	1.50852	0.828926		1.04224	0.0697973
0.800792	1.24984	1.12811	1.21462	1.16567	0.700626	1.01117	1.21722	1.15087	0.768393	1.54631	0.844894		1.06654	0.0714954
0.817292	1.27746	1.15481	1.2416	1.19951	0.717816	1.03186	1.23997	1.17613	0.789841	1.58423	0.861582		1.09101	0.0731857
0.833903	1.30513	1.18148	1.26801	1.23374	0.734832	1.05259	1.2623	1.20145	0.811496	1.6218	0.878787		1.11546	0.0748456
0.850091	1.33265	1.20766	1.29409	1.26838	0.751653	1.07324	1.28356	1.22635	0.833624	1.65925	0.896613		1.13976	0.0764767
0.866372	1.36016	1.2335	1.32003	1.3029	0.768318	1.09386	1.30467	1.25069	0.856094	1.69709	0.914608		1.16402	0.0781168
0.882777	1.38745	1.25961	1.34564	1.33687	0.785006	1.11431	1.3263	1.27461	0.878957	1.73494	0.932163		1.18822	0.0797555
0.899143	1.4144	1.28575	1.37153	1.37064	0.801429	1.13463	1.34816	1.29803	0.902129	1.77225	0.949439		1.21229	0.0813817
0.915787	1.44033	1.31182	1.39808	1.40481	0.817709	1.15498	1.36997	1.32089	0.925866	1.80977	0.965907		1.23633	0.0830222
0.932455	1.46453	1.33774	1.42473	1.43932	0.834204	1.17549	1.39152	1.34314	0.950368	1.84773	0.981769		1.26025	0.0846478
0.94894	1.48749	1.36324	1.45127	1.47407	0.85067	1.19602	1.41344	1.36438	0.975368	1.88513	0.997513		1.28396	0.0862289
0.965025	1.50986	1.38813	1.47803	1.50901	0.867096	1.21637	1.43567	1.38479	1.00052	1.92191	1.01401		1.30754	0.087774
0.980453	1.53182	1.41236	1.50502	1.54427	0.883424	1.2365	1.45766	1.40482	1.02577	1.95857	1.03189		1.33105	0.0893081
0.995146	1.55372	1.43675	1.53204	1.57997	0.899627	1.25622	1.48001	1.42451	1.05144	1.99532	1.04978		1.35454	0.090893
1.00976	1.57575	1.46209	1.55941	1.61544	0.915638	1.27549	1.50318	1.44407	1.07717	2.03221	1.06718		1.37812	0.0925435
1.02502	1.59752	1.48828	1.58681	1.65026	0.931332	1.29445	1.52715	1.46372	1.10266	2.06911	1.08499		1.40177	0.0941983
1.04041	1.61841	1.5148	1.61388	1.68527	0.946698	1.31316	1.55128	1.48367	1.12821	2.10596	1.10326		1.42542	0.0958525
1.05584	1.63806	1.5413	1.64113	1.72131	0.961486	1.33156	1.57459	1.50386	1.15364	2.14275	1.12175		1.44894	0.0975365
1.07132	1.65665	1.568	1.66824	1.7578	0.975875	1.34971	1.59722	1.52413	1.17877	2.17974	1.14085		1.47236	0.0992426
1.08643	1.67577	1.59498	1.69494	1.79421	0.989915	1.36788	1.61989	1.5444	1.20387	2.21682	1.16115		1.49585	0.100966
1.10147	1.69664	1.62193	1.72166	1.83061	1.00343	1.38575	1.6428	1.56455	1.22902	2.25362	1.18267		1.51951	0.102709
1.11646	1.71857	1.64877	1.74841	1.86691	1.01653	1.4033	1.6658	1.58501	1.25439	2.29058	1.20441		1.54326	0.104498
1.13145	1.74093	1.67612	1.77505	1.90322	1.02915	1.4209	1.68886	1.6057	1.28031	2.32757	1.22495		1.56702	0.106345
1.14658	1.7633	1.70402	1.80145	1.93939	1.0412	1.43854	1.71215	1.62626	1.30635	2.36372	1.24467		1.59064	0.108193
1.16168	1.78542	1.73186	1.82791	1.97549	1.05252	1.45652	1.73546	1.64695	1.3322	2.39913	1.26529		1.6142	0.110015
1.17651	1.80743	1.75933	1.8547	2.01211	1.06314	1.4749	1.75862	1.6676	1.35833	2.43404	1.28715		1.63782	0.11183
1.19086	1.82871	1.78613	1.88192	2.04916	1.07332	1.49355	1.78161	1.68786	1.38477	2.46824	1.30981		1.66133	0.113626
1.20483	1.84933	1.81228	1.90972	2.08619	1.0832	1.51238	1.80442	1.70762	1.41142	2.50199	1.33341		1.68473	0.115401
1.21848	1.87011	1.83795	1.93804	2.12209	1.09291	1.53157	1.82766	1.72694	1.43833	2.53534	1.35781		1.7081	0.117137
1.23187	1.89136	1.86307	1.96711	2.15627	1.10232	1.55116	1.85119	1.74615	1.46557	2.56771	1.38243		1.73135	0.118806
1.24498	1.91262	1.88742	1.99673	2.18925	1.11139	1.57028	1.87446	1.76505	1.49315	2.59887	1.40622		1.7542	0.120433
1.25763	1.93385	1.91128	2.02653	2.22143	1.12023	1.58922	1.89755	1.7834	1.52082	2.62899	1.42878		1.77664	0.122044
1.27004	1.95534	1.93532	2.05646	2.25253	1.12896	1.60849	1.92044	1.80117	1.54868	2.65821	1.45154		1.79893	0.123596
1.28253	1.97661	1.95886	2.08634	2.2817	1.13762	1.62768	1.94321	1.81827	1.57655	2.68735	1.47535		1.82101	0.125073
1.29508	1.99797	1.98203	2.11674	2.30979	1.1463	1.64674	1.96537	1.83462	1.60408	2.71691	1.49884		1.84287	0.126568
1.30756	2.01976	2.00541	2.14719	2.3378	1.1553	1.66562	1.98661	1.85013	1.63153	2.74621	1.52132		1.86454	0.128073
1.31977	2.04153	2.02844	2.17714	2.36574	1.16456	1.68435	2.00744	1.86492	1.659	2.77466	1.54344		1.88592	0.129537
1.33188	2.0639	2.05166	2.20707	2.39388	1.17382	1.70287	2.0282	1.87929	1.68681	2.80225	1.56494		1.90721	0.130994
1.34378	2.08762	2.07525	2.23676	2.42188	1.18302	1.7213	2.04875	1.89333	1.71491	2.82908	1.58598		1.92847	0.132447
1.35518	2.11225	2.09899	2.26633	2.45035	1.19214	1.73974	2.06889	1.90664	1.74334	2.85562	1.60642		1.94966	0.133944
1.3664	2.13726	2.12304	2.2959	2.47925	1.20121	1.758	2.08854	1.91916	1.772	2.88241	1.62534		1.97071	0.135523
1.37758	2.16275	2.14729	2.32509	2.50787	1.21019	1.77655	2.10797	1.93132	1.79982	2.90956	1.64388		1.99166	0.137143
1.38873	2.18789	2.17141	2.35368	2.53672	1.21914	1.79549	2.12727	1.94332	1.82661	2.93706	1.66299		2.01252	0.13878
1.39988	2.21179	2.19513	2.38179	2.56661	1.22801	1.81435	2.1458	1.95522	1.8527	2.96464	1.68156		2.03312	0.140455
1.41107	2.23545	2.21877	2.40969	2.5984	1.23669	1.83333	2.16329	1.96698	1.87839	2.99136	1.69954		2.05358	0.14216
1.42242	2.25872	2.24211	2.43733	2.63113	1.24527	1.8525	2.18032	1.97857	1.90423	3.01685	1.71792		2.07395	0.143817
1.43391	2.28073	2.265	2.46496	2.66352	1.25359	1.87172	2.19731	1.98993	1.92999	3.0418	1.73607		2.09404	0.145445
1.44543	2.30238	2.28807	2.49263	2.69527	1.26173	1.8911	2.2144	2.00093	1.95534	3.06682	1.7533		2.11395	0.147095
1.45676	2.3241	2.31106	2.51993	2.72663	1.26976	1.91061	2.23152	2.01159	1.98015	3.09192	1.77009		2.13368	0.148766
1.46806	2.34578	2.33381	2.54711	2.7581	1.27758	1.92995	2.24871	2.02186	2.00435	3.11672	1.78663		2.15322	0.150454
1.47938	2.36785	2.35638	2.57421	2.78965	1.28532	1.94894	2.26608	2.03196	2.02798	3.14088	1.80316		2.17265	0.152138
1.49055	2.3902	2.3785	2.6011	2.82193	1.29296	1.96778	2.28359	2.04208	2.05096	3.16442	1.81966		2.19198	0.153835
1.50172	2.41225	2.40043	2.62797	2.85483	1.30061	1.98673	2.30125	2.05212	2.0736	3.18744	1.83549		2.2112	0.155545
1.51275	2.43456	2.42239	2.65486	2.88723	1.30817	2.00564	2.31916	2.06206	2.0963	3.2099	1.85058		2.2303	0.157251
1.5233	2.45736	2.44458	2.68193	2.91865	1.31556	2.0245	2.33808	2.07179	2.11908	3.2319	1.86571		2.24937	0.158953
1.53295	2.47934	2.4671	2.70895	2.94944	1.32297	2.04338	2.35833	2.08112	2.14184	3.25393	1.88106		2.26837	0.160674
1.54171	2.501	2.48984	2.73568	2.97996	1.33034	2.06203	2.37976	2.09011	2.16439	3.27603	1.89575		2.28722	0.162448
1.55021	2.5236	2.51238	2.76216	3.01008	1.33764	2.08051	2.40195	2.09888	2.18678	3.29751	1.91035		2.306	0.164212
1.55871	2.5463	2.53434	2.78809	3.04039	1.34498	2.0988	2.42376	2.10751	2.20913	3.31821	1.92543		2.32464	0.165933
1.56724	2.56839	2.55607	2.81362	3.0706	1.3523	2.1168	2.44523	2.11602	2.23171	3.33855	1.94043		2.34308	0.167628
1.57566	2.59005	2.57741	2.83884	3.10004	1.3596	2.13452	2.46657	2.12447	2.25482	3.35855	1.9548		2.36128	0.169293
1.58398	2.61053	2.59827	2.86343	3.1289	1.36698	2.15192	2.48749	2.13288	2.27831	3.37824	1.96866		2.37913	0.170912
1.59227	2.63028	2.61894	2.88753	3.1575	1.37439	2.16917	2.5084	2.14112	2.30245	3.39739	1.98309		2.39688	0.172478
1.6002	2.65002	2.63929	2.91131	3.1867	1.38173	2.18642	2.5287	2.14925	2.32761	3.41594	1.99813		2.41461	0.174035
1.60811	2.66865	2.6593	2.93469	3.21655	1.38888	2.20378	2.54794	2.15742	2.35343	3.4341	2.01313		2.43217	0.175584
1.61627	2.68639	2.67869	2.95757	3.24674	1.3959	2.22066	2.56678	2.16577	2.37959	3.45172	2.02766		2.44948	0.177111
1.62484	2.70463	2.69737	2.98005	3.27655	1.40292	2.23685	2.58555	2.17434	2.40616	3.46877	2.04149		2.46663	0.178602
1.63386	2.72304	2.71551	3.00223	3.30537	1.40977	2.25333	2.60414	2.18301	2.43309	3.48546	2.05484		2.48364	0.180038
1.64283	2.7404	2.73343	3.02421	3.33314	1.41639	2.27003	2.62223	2.19165	2.46019	3.50215	2.06722		2.50032	0.181456
1.65166	2.75717	2.75138	3.04627	3.35983	1.42276	2.28672	2.64045	2.20019	2.48743	3.51871	2.07877		2.51678	0.18287
1.6604	2.77418	2.76911	3.0682	3.38652	1.42898	2.30367	2.65897	2.20854	2.51463	3.53463	2.09015		2.53316	0.18428
1.66913	2.79115	2.78657	3.08987	3.41391	1.43514	2.32096	2.67779	2.21675	2.54144	3.54975	2.10126		2.54948	0.185692
1.67783	2.80863	2.8035	3.11147	3.44203	1.44103	2.33848	2.69716	2.22474	2.56796	3.56432	2.1115		2.56572	0.18715
1.68626	2.82632	2.81982	3.1329	3.46992	1.4468	2.35575	2.71672	2.23236	2.59416	3.57886	2.12047		2.58169	0.188649
1.69481	2.84366	2.83604	3.15406	3.49661	1.45262	2.3726	2.73709	2.2396	2.61978	3.59313	2.12888		2.59741	0.190112
1.70361	2.86118	2.85226	3.17492	3.52296	1.45861	2.38922	2.75821	2.24645	2.64487	3.60706	2.1368		2.61301	0.191559
1.71237	2.87883	2.86837	3.19551	3.5495	1.46475	2.40636	2.77913	2.25296	2.66947	3.62085	2.14389		2.6285	0.193021
1.7209	2.89613	2.88442	3.2159	3.57663	1.4709	2.42354	2.79956	2.25926	2.69351	3.63396	2.15034		2.64375	0.194499
1.72877	2.91255	2.90025	3.23597	3.60435	1.47727	2.43995	2.81956	2.26544	2.71718	3.64647	2.15636		2.65868	0.195995
1.73598	2.92878	2.91577	3.25572	3.63232	1.48386	2.4561	2.83968	2.27141	2.74058	3.6586	2.16242		2.67343	0.197504
1.74318	2.94503	2.93085	3.27512	3.66047	1.49065	2.4715	2.85973	2.2773	2.76361	3.67018	2.16808		2.68798	0.199003
1.75054	2.96056	2.94544	3.29414	3.68802	1.49763	2.48612	2.87911	2.28296	2.78626	3.68145	2.1734		2.70213	0.200457
1.75778	2.97571	2.95974	3.31286	3.71484	1.50468	2.50064	2.89745	2.28823	2.80873	3.69275	2.17892		2.71603	0.201878
1.76482	2.99017	2.97396	3.33135	3.74123	1.51192	2.51518	2.91494	2.29353	2.83105	3.70386	2.18451		2.72971	0.203264
1.77159	3.00357	2.98799	3.34973	3.76756	1.51919	2.52986	2.9322	2.29885	2.85313	3.7144	2.19036		2.7432	0.20462
1.77794	3.01663	3.00147	3.36774	3.79412	1.52646	2.54448	2.94931	2.30404	2.87535	3.7248	2.19617		2.75654	0.205992
1.78398	3.02983	3.0144	3.38527	3.82054	1.53387	2.55899	2.9666	2.30912	2.8975	3.73517	2.20161		2.76974	0.207367
1.78982	3.04316	3.02685	3.4026	3.84669	1.54136	2.57335	2.9842	2.31395	2.91934	3.74528	2.2068		2.78278	0.20874
1.79559	3.05665	3.03874	3.41988	3.87212	1.54879	2.58794	3.00193	2.3185	2.94111	3.75523	2.21156		2.79567	0.210104
1.80162	3.07096	3.05019	3.43716	3.89694	1.55627	2.60252	3.01948	2.32287	2.96241	3.76484	2.216		2.80844	0.211438
1.80773	3.0857	3.06136	3.4541	3.92185	1.56381	2.61697	3.03673	2.32702	2.98322	3.77396	2.21997		2.82103	0.212767
1.81338	3.10026	3.07248	3.47078	3.94642	1.57136	2.63215	3.05439	2.3308	3.00369	3.7831	2.22364		2.83354	0.214111
1.8185	3.11482	3.08377	3.48719	3.9705	1.57912	2.64773	3.07272	2.33455	3.02355	3.7925	2.22696		2.84599	0.215464
1.82322	3.12891	3.09493	3.50296	3.9943	1.58688	2.66328	3.0919	2.3383	3.04291	3.80182	2.22954		2.85825	0.216827
1.82767	3.14322	3.10582	3.51828	4.01768	1.59474	2.67885	3.11173	2.34174	3.06174	3.81118	2.2321		2.8704	0.218187
1.83221	3.15836	3.11679	3.53324	4.0407	1.60292	2.69447	3.13162	2.34517	3.0801	3.82043	2.23429		2.88252	0.219528
1.83668	3.17347	3.12778	3.5481	4.06322	1.61121	2.71031	3.15145	2.34845	3.09789	3.82933	2.23579		2.89447	0.220853
1.84068	3.18859	3.13853	3.56298	4.08508	1.61962	2.72606	3.17113	2.35135	3.11499	3.83798	2.2375		2.90621	0.222161
1.8443	3.20387	3.14923	3.57745	4.10631	1.62815	2.74162	3.19069	2.35401	3.13171	3.84647	2.2394		2.91777	0.223445
1.84785	3.21886	3.16007	3.59137	4.12708	1.63684	2.75725	3.21033	2.35645	3.14796	3.85519	2.24155		2.92923	0.224704
1.85148	3.23339	3.17115	3.60493	4.14755	1.64568	2.77303	3.23019	2.35867	3.16397	3.86415	2.24392		2.94068	0.225944
1.85523	3.24779	3.1825	3.61842	4.16774	1.65469	2.7887	3.2499	2.36072	3.17971	3.87344	2.24639		2.9521	0.227178
1.859	3.26169	3.19381	3.63182	4.18793	1.66377	2.80416	3.26898	2.36269	3.19502	3.88294	2.24892		2.9634	0.228406
1.8627	3.27449	3.20485	3.6451	4.20806	1.67285	2.81952	3.28765	2.36435	3.21032	3.89237	2.25148		2.97448	0.229625
1.86648	3.28711	3.216	3.65828	4.22789	1.68217	2.83461	3.30604	2.36579	3.22533	3.90181	2.25423		2.98548	0.230819
1.8702	3.29964	3.22739	3.67118	4.24739	1.69151	2.8495	3.32418	2.36719	3.23985	3.91109	2.25684		2.99633	0.231995
1.87364	3.31165	3.23875	3.68365	4.26661	1.70081	2.86415	3.34202	2.36838	3.25389	3.92045	2.2596		3.00697	0.233161
1.87701	3.32346	3.25035	3.69579	4.28568	1.71016	2.87854	3.35946	2.36958	3.26762	3.93013	2.26268		3.01754	0.234315
1.88016	3.33498	3.26234	3.70788	4.30452	1.71941	2.89281	3.37659	2.37092	3.28138	3.94014	2.26562		3.02806	0.235485
1.88291	3.34624	3.27432	3.72017	4.323	1.72866	2.90693	3.39297	2.37236	3.2949	3.95073	2.26848		3.03847	0.236668
1.88512	3.35746	3.28619	3.73258	4.34116	1.73781	2.92083	3.40853	2.37403	3.30811	3.96169	2.27133		3.04874	0.237863
1.88687	3.36866	3.29815	3.74511	4.35937	1.74703	2.93467	3.42377	2.3758	3.32102	3.97268	2.27433		3.05896	0.23907
1.88837	3.3794	3.31012	3.75771	4.37745	1.75646	2.94849	3.43888	2.37759	3.33362	3.9834	2.27742		3.06908	0.240259
1.88956	3.39052	3.32213	3.77025	4.3949	1.76594	2.96227	3.45413	2.37941	3.34596	3.99413	2.28033		3.07913	0.241442
1.89053	3.40279	3.33437	3.78288	4.41191	1.77551	2.97608	3.46946	2.38128	3.35787	4.0052	2.2831		3.08925	0.24264
1.89122	3.41465	3.3467	3.79561	4.42843	1.78497	2.98973	3.48476	2.38329	3.36938	4.01651	2.2858		3.09926	0.243837
1.89174	3.42564	3.35915	3.80859	4.44445	1.79435	3.00322	3.49999	2.38544	3.38081	4.02841	2.28866		3.10921	0.245034
1.8923	3.43643	3.37182	3.8219	4.45992	1.80363	3.01674	3.51497	2.38756	3.39222	4.04087	2.29191		3.11919	0.246223
1.89284	3.44726	3.3847	3.8355	4.47476	1.8127	3.03028	3.52983	2.38969	3.40342	4.05341	2.29538		3.12915	0.247401
1.89379	3.45813	3.39776	3.84922	4.48925	1.82175	3.04361	3.54496	2.39169	3.4143	4.06566	2.29884		3.13908	0.248553
1.89525	3.46866	3.41104	3.86275	4.5034	1.83075	3.05669	3.56065	2.39343	3.42495	4.0773	2.30226		3.14893	0.249668
1.89706	3.47903	3.42467	3.87636	4.51722	1.8398	3.06977	3.57683	2.39499	3.43536	4.08889	2.30542		3.15878	0.250773
1.89915	3.48925	3.43822	3.88995	4.53045	1.84862	3.0825	3.59312	2.39652	3.44544	4.10103	2.30816		3.16853	0.251879
1.90132	3.49967	3.4517	3.9036	4.54318	1.8572	3.09505	3.60978	2.39834	3.45535	4.1139	2.31084		3.17833	0.252997
1.90377	3.50998	3.46501	3.91744	4.55536	1.86559	3.10755	3.62635	2.40039	3.46493	4.12663	2.31369		3.18806	0.254077
1.90652	3.51988	3.47793	3.93122	4.56656	1.87368	3.11967	3.64241	2.40266	3.47423	4.13923	2.31665		3.19755	0.255092
1.90946	3.53026	3.49094	3.94525	4.57712	1.88184	3.13163	3.65839	2.40514	3.48351	4.15209	2.31943		3.20709	0.25609
1.91251	3.54077	3.50375	3.95918	4.58725	1.88986	3.14338	3.67402	2.40756	3.49258	4.16453	2.32172		3.21643	0.25707
1.91552	3.55153	3.51646	3.97349	4.5971	1.89805	3.15527	3.68988	2.41028	3.50138	4.17737	2.32358		3.22583	0.258062
1.9184	3.5622	3.52884	3.98787	4.60642	1.90632	3.16701	3.70547	2.41329	3.5097	4.19049	2.32524		3.2351	0.259035
1.92119	3.57298	3.5412	4.00237	4.61526	1.91456	3.17883	3.72091	2.41684	3.51782	4.20417	2.32686		3.24442	0.26
1.92392	3.58433	3.55365	4.01715	4.6237	1.92289	3.19071	3.73635	2.421	3.52566	4.21852	2.32837		3.25385	0.260969
1.92642	3.59557	3.56582	4.0315	4.63126	1.93103	3.20229	3.75124	2.42533	3.53295	4.2328	2.32986		3.26301	0.261891
1.92886	3.60715	3.57857	4.04657	4.63825	1.93955	3.21454	3.76684	2.42998	3.54015	4.24773	2.33158		3.27248	0.26282
1.93113	3.61791	3.59046	4.06087	4.64434	1.94759	3.226	3.78142	2.43431	3.54678	4.26192	2.33321		3.28133	0.263683
1.93321	3.62937	3.60325	4.07601	4.65054	1.95606	3.23792	3.79672	2.43897	3.55367	4.27746	2.33484		3.29067	0.26462
1.93503	3.6406	3.61598	4.09105	4.65683	1.96438	3.24966	3.81184	2.44358	3.56025	4.29272	2.33635		3.29986	0.265568
1.9367	3.65151	3.62797	4.10563	4.66289	1.9723	3.26111	3.82619	2.44799	3.5662	4.30732	2.33788		3.30864	0.266482
1.9387	3.66529	3.64256	4.12339	4.66964	1.98189	3.27504	3.84358	2.45355	3.57309	4.32536	2.33994		3.31934	0.267578
1.93995	3.67391	3.65166	4.13439	4.67362	1.98783	3.2836	3.85438	2.45705	3.57729	4.33655	2.34124		3.32596	0.268253

## Sheet: noise minus 90 y
fly1	fly2	fly3	fly4	fly5	fly6	fly7	fly8	fly9	fly10	fly11	fly12		Avg	SEM
-0.000215609	-3.86699e-07	4.13576e-07	5.17473e-07	-9.79728e-08	-7.34195e-05	-3.18432e-07	2.98703e-07	-5.97505e-08	-6.07592e-09	1.37536e-07	-3.84815e-07		-2.40762e-05	1.84478e-05
-0.000395501	3.82107e-07	-3.49623e-07	-5.65625e-07	1.01656e-07	-6.68922e-05	3.57633e-07	1.12461e-06	-2.00691e-07	-8.68042e-08	3.91791e-08	1.16252e-07		-3.84562e-05	3.29314e-05
-0.000562825	-2.36382e-07	1.82775e-07	4.30979e-07	-7.1828e-08	-6.80978e-05	-2.7571e-07	-6.16303e-07	5.03412e-07	1.90661e-07	-2.81426e-07	2.81308e-07		-5.25679e-05	4.67302e-05
-0.000695293	-5.78914e-08	1.02885e-07	-5.8097e-08	3.99372e-09	-6.94021e-05	7.60341e-08	3.53985e-06	-7.50149e-07	-2.733e-07	5.3087e-07	-6.34789e-07		-6.3518e-05	5.77251e-05
-0.000778805	4.61707e-07	-3.75761e-07	-4.55919e-07	9.52523e-08	-6.73872e-05	2.09696e-07	-1.83415e-06	8.57147e-07	2.95028e-07	-7.02403e-07	1.02245e-06		-7.05516e-05	6.46292e-05
-0.000863434	-8.19991e-07	9.67616e-07	9.91027e-07	-2.05187e-07	-6.95553e-05	-4.48172e-07	7.2185e-06	-7.02676e-07	-2.21547e-07	7.02648e-07	-1.68713e-06		-7.72662e-05	7.17094e-05
-0.000874725	1.01813e-06	-1.98951e-06	-1.14876e-06	2.91735e-07	-6.78061e-05	7.16421e-07	-2.56715e-05	3.22629e-07	3.98108e-08	-4.28001e-07	9.51682e-07		-8.07024e-05	7.24179e-05
-0.000875092	-8.51837e-07	1.29613e-07	1.21141e-06	-3.13488e-07	-6.87574e-05	-1.376e-06	-0.000138047	4.17782e-07	2.31036e-07	-7.05171e-08	-2.92345e-06		-9.04535e-05	7.23733e-05
-0.000855239	7.65171e-07	-3.95794e-06	-2.2723e-06	2.3469e-07	-6.91852e-05	3.06335e-07	-0.000254534	-1.50682e-06	-5.16826e-07	7.66187e-07	-1.64139e-06		-9.88984e-05	7.19672e-05
-0.000746985	-9.75081e-07	-3.64489e-06	-9.38328e-07	-3.97394e-08	-6.74077e-05	-1.94249e-06	-0.000374236	1.08402e-06	7.28816e-07	-1.24194e-06	-2.90051e-06		-9.98749e-05	6.64531e-05
-0.00062853	-1.54897e-06	-5.89617e-06	-3.46873e-06	-2.54076e-07	4.27791e-07	-4.85739e-07	-0.000485927	-4.70417e-06	-7.95872e-07	1.71751e-06	-5.60526e-06		-9.45893e-05	6.30005e-05
-0.000515313	-1.16726e-06	-1.25813e-05	-5.80367e-06	5.61136e-07	4.5033e-05	-2.72164e-06	-0.000612841	4.15866e-07	7.71528e-07	-3.13525e-06	7.43516e-05		-8.60358e-05	6.51376e-05
-0.000361211	-7.74096e-06	0.000106722	-8.22117e-06	-8.02485e-07	2.01004e-05	2.5522e-07	-0.000695691	-7.43561e-06	-6.59376e-07	-7.8316e-07	0.000186488		-6.40817e-05	6.80874e-05
-9.4431e-05	-3.60757e-06	0.000393473	3.94023e-06	8.79577e-07	9.08598e-05	8.59616e-05	-0.000713191	-2.13292e-06	-5.03161e-07	-5.37381e-06	0.000376362		1.10198e-05	7.92139e-05
0.00022165	-1.91041e-05	0.000775344	0.000219312	-8.29126e-07	0.000196676	0.000207874	-0.000826897	6.39838e-05	8.43258e-07	-7.6236e-06	0.000727614		0.000129904	0.000116628
0.000576509	9.77345e-05	0.00127557	0.000558094	5.598e-07	0.000349607	0.000322081	-0.00097122	0.00022343	-2.76599e-06	-9.93135e-06	0.00107539		0.000291255	0.000166019
0.00103971	0.000391843	0.00202784	0.00094337	1.00033e-06	0.000673298	0.000434951	-0.00101059	0.000546871	3.76026e-06	9.78826e-06	0.00142668		0.00054071	0.000225741
0.00164342	0.000723767	0.00306053	0.00159966	-9.33349e-08	0.00112124	0.000590838	-0.000929046	0.000893494	-7.16769e-06	0.000244478	0.00192334		0.000905372	0.000305763
0.00243465	0.00137375	0.00431621	0.00249517	3.59747e-06	0.00174629	0.000925337	-0.000774477	0.0012875	2.46868e-05	0.000685061	0.00251005		0.00141898	0.000403033
0.00346865	0.00243241	0.00586204	0.00364347	-3.24751e-06	0.00254978	0.0012847	-0.000497454	0.0018835	0.000105115	0.00131918	0.00310052		0.00209572	0.000523633
0.00487594	0.00364988	0.00771432	0.00509438	7.66011e-06	0.00353211	0.00155901	-3.71643e-05	0.00261778	0.000120382	0.0021988	0.00387326		0.00293386	0.000679132
0.00666326	0.00515362	0.00988893	0.00691362	-2.81749e-05	0.00471052	0.00192146	0.000588025	0.00346414	0.000110295	0.00332889	0.0049089		0.00396862	0.000874586
0.00918234	0.0072887	0.0123186	0.00921572	-0.000157864	0.00608055	0.00237341	0.00155929	0.00443403	0.000113579	0.00484394	0.00579256		0.00525374	0.00111685
0.0126376	0.0102499	0.0148492	0.011969	-0.000320795	0.00765424	0.00287268	0.00290132	0.00565007	0.000108974	0.00668032	0.00640155		0.00680451	0.00141906
0.0166409	0.0141466	0.0176773	0.0151802	-0.000435321	0.00932523	0.00337098	0.00463666	0.00711276	9.7023e-05	0.00892141	0.00704894		0.00864356	0.00179082
0.021162	0.0190658	0.0209326	0.0186706	-0.000360138	0.0110397	0.00383806	0.00686882	0.00877773	0.000150435	0.0115481	0.00797931		0.0108061	0.00222734
0.0264424	0.024836	0.0244444	0.0224463	-0.00020436	0.0127074	0.00426062	0.00941979	0.0106493	0.000416978	0.0144102	0.00928911		0.0132598	0.00272952
0.0327279	0.0315199	0.0280211	0.0265068	1.20484e-05	0.0142472	0.00461826	0.0123335	0.0126274	0.000939175	0.0175245	0.0107504		0.0159857	0.00330902
0.0400394	0.0393001	0.0316721	0.0306461	0.000630294	0.0156581	0.00481908	0.0157258	0.0148916	0.00168259	0.020623	0.0123671		0.0190046	0.00396461
0.0482923	0.0480429	0.0355774	0.0349272	0.00164855	0.0168661	0.00474286	0.0195935	0.0175203	0.00271664	0.0237771	0.0143449		0.0223375	0.00470124
0.0573391	0.0579491	0.039695	0.0394582	0.00276449	0.0177833	0.00462768	0.0240876	0.0203921	0.00422312	0.0270245	0.0165666		0.0259926	0.00552893
0.0673816	0.0691553	0.0440694	0.0444506	0.00392414	0.0185411	0.00445929	0.0292372	0.0234815	0.00637567	0.0302313	0.0188699		0.0300147	0.0064702
0.0788843	0.0815388	0.0488162	0.0498566	0.00530437	0.0193227	0.00408537	0.0350139	0.0269761	0.0091641	0.0334736	0.021247		0.0344736	0.00754112
0.0914265	0.0949404	0.0540337	0.0555119	0.0070522	0.0199437	0.00364308	0.0413017	0.0310695	0.0125873	0.0365833	0.0240606		0.0393462	0.00870555
0.104758	0.109088	0.0598715	0.0615347	0.00917779	0.0203399	0.00311134	0.047889	0.035649	0.0168348	0.0395984	0.0274291		0.0446069	0.00994076
0.119164	0.124022	0.0661121	0.0679808	0.0115216	0.0206553	0.00250704	0.0545238	0.0406773	0.0219818	0.0425891	0.0308708		0.0502171	0.0112666
0.134696	0.139755	0.0726456	0.0749645	0.0138444	0.0209211	0.00197226	0.0612283	0.0461615	0.0280534	0.0456307	0.0343068		0.0561816	0.0126892
0.151037	0.156173	0.0796017	0.0826227	0.0162354	0.0212422	0.00156828	0.0683896	0.0521178	0.0349613	0.0488898	0.0380578		0.0625747	0.0141821
0.167831	0.173299	0.0870226	0.0910696	0.0188483	0.0217379	0.00121746	0.0757893	0.0583706	0.0426828	0.0523708	0.042186		0.0693688	0.0157266
0.18519	0.191187	0.0949772	0.100363	0.0213864	0.02244	0.0010388	0.0834954	0.0650359	0.0514055	0.0561534	0.0464623		0.0765946	0.0173332
0.202998	0.209588	0.103394	0.110551	0.0238224	0.0233774	0.00112389	0.0916738	0.0724317	0.0609858	0.0602075	0.050765		0.0842432	0.0189839
0.221016	0.228021	0.112259	0.121656	0.026546	0.0247297	0.0013368	0.0997532	0.0803812	0.071384	0.0646691	0.0552446		0.0922497	0.0206309
0.238935	0.246681	0.121448	0.133518	0.0296232	0.0264111	0.00183234	0.108131	0.0889865	0.0827181	0.0697457	0.0598058		0.100653	0.022262
0.256529	0.265702	0.13083	0.146024	0.032994	0.0283058	0.00250751	0.117023	0.0981181	0.0949101	0.0753587	0.0643245		0.109386	0.0238848
0.273933	0.284487	0.140504	0.159215	0.0365534	0.030689	0.00316266	0.126108	0.107574	0.108008	0.0815312	0.0689779		0.118395	0.0254784
0.291202	0.303285	0.150227	0.17326	0.040291	0.0334921	0.00401454	0.13582	0.117407	0.121967	0.088279	0.0738496		0.127758	0.0270547
0.308333	0.322198	0.159839	0.188214	0.0443332	0.0367405	0.00519018	0.146529	0.127585	0.136708	0.0953873	0.078956		0.137501	0.0286155
0.325281	0.340597	0.16946	0.204098	0.048704	0.040619	0.0066263	0.158167	0.138234	0.152283	0.102674	0.0838417		0.147549	0.0301375
0.342216	0.359133	0.179164	0.220878	0.0535295	0.0449009	0.00834228	0.170314	0.149316	0.168707	0.110087	0.0881521		0.157895	0.0316719
0.359085	0.37829	0.189024	0.238401	0.0586818	0.0497145	0.0104316	0.183176	0.161155	0.185964	0.117659	0.0923792		0.168664	0.0332291
0.375753	0.397888	0.198924	0.256547	0.0640507	0.0552293	0.0128006	0.196827	0.173557	0.204	0.125362	0.0968664		0.179817	0.0347912
0.392475	0.418252	0.208791	0.275279	0.0697817	0.0613509	0.0154565	0.211101	0.185981	0.22284	0.133068	0.101724		0.191342	0.0363841
0.409536	0.439536	0.218803	0.294629	0.0758837	0.0680837	0.0184994	0.226281	0.198677	0.242509	0.140725	0.106604		0.203314	0.0380335
0.426829	0.461735	0.229177	0.31439	0.082388	0.0753075	0.0218105	0.241784	0.211561	0.262821	0.148186	0.111271		0.215605	0.0397422
0.443966	0.484905	0.240004	0.334717	0.089098	0.0829362	0.0254699	0.257229	0.224628	0.283778	0.155382	0.116158		0.228189	0.0414956
0.460954	0.509414	0.251277	0.355887	0.095973	0.0909607	0.0297247	0.272595	0.237884	0.305465	0.162512	0.12117		0.241151	0.0433096
0.477665	0.535088	0.263032	0.377581	0.103146	0.0994322	0.0345313	0.287761	0.251386	0.32783	0.169696	0.126172		0.254443	0.0451636
0.493907	0.561839	0.275152	0.399713	0.110539	0.108253	0.0398254	0.302656	0.265482	0.350857	0.176877	0.131119		0.268018	0.0470545
0.509613	0.590165	0.287519	0.422262	0.118205	0.117275	0.0456957	0.317309	0.279907	0.374444	0.184021	0.136173		0.281882	0.0490008
0.525004	0.618928	0.300047	0.445162	0.12592	0.1265	0.0521962	0.332225	0.294538	0.398475	0.19127	0.141587		0.295988	0.0509542
0.540564	0.647284	0.312596	0.468592	0.133529	0.135738	0.0594293	0.347099	0.309348	0.422784	0.198687	0.146992		0.31022	0.052903
0.556134	0.675398	0.325524	0.492575	0.141239	0.144934	0.0674909	0.361993	0.32426	0.447434	0.206447	0.152293		0.324643	0.0548432
0.571695	0.703551	0.339109	0.517065	0.14902	0.154048	0.0763961	0.377287	0.339503	0.472522	0.214579	0.15752		0.339358	0.0567905
0.58733	0.732292	0.353084	0.54214	0.15678	0.162906	0.0862064	0.392753	0.355184	0.497905	0.222761	0.162796		0.354345	0.0587795
0.603218	0.761234	0.367385	0.567615	0.164423	0.17152	0.096997	0.408839	0.371363	0.52369	0.231167	0.168118		0.369631	0.060794
0.619653	0.790506	0.381994	0.59295	0.171979	0.179911	0.108882	0.425843	0.387998	0.549852	0.23974	0.173302		0.385217	0.0628369
0.636444	0.820327	0.396876	0.618119	0.179589	0.188118	0.121744	0.44394	0.40503	0.57635	0.24813	0.17832		0.401082	0.0649193
0.653871	0.850232	0.412148	0.64344	0.187156	0.196161	0.135268	0.462709	0.422122	0.603284	0.256336	0.183015		0.417145	0.0670508
0.672294	0.88026	0.427963	0.669026	0.19455	0.204053	0.149579	0.481891	0.43908	0.630558	0.264369	0.187743		0.433447	0.0692318
0.691594	0.910982	0.444414	0.694863	0.201844	0.211885	0.164799	0.502008	0.456265	0.658015	0.272356	0.192512		0.450128	0.0714754
0.71149	0.943265	0.461463	0.720841	0.209306	0.219729	0.180684	0.522791	0.473775	0.685531	0.28014	0.19704		0.467171	0.0738193
0.73185	0.977076	0.479124	0.746747	0.216938	0.227576	0.197136	0.544374	0.491681	0.713452	0.287599	0.201566		0.484593	0.0762606
0.75265	1.01216	0.497149	0.772395	0.224487	0.235455	0.214185	0.566556	0.509912	0.741742	0.294757	0.206307		0.502313	0.0787793
0.773742	1.04783	0.515309	0.797922	0.232018	0.243405	0.231774	0.588865	0.528222	0.770016	0.301486	0.211337		0.520161	0.0813294
0.795051	1.08342	0.533691	0.823322	0.239554	0.251445	0.249658	0.610997	0.546632	0.798571	0.308014	0.216781		0.538095	0.0838779
0.816384	1.11973	0.552233	0.849072	0.24708	0.259716	0.268069	0.632266	0.564985	0.827208	0.314415	0.222964		0.556177	0.0864425
0.837706	1.15691	0.570907	0.875663	0.254753	0.26811	0.287345	0.653188	0.583187	0.855896	0.320967	0.22947		0.574509	0.0890411
0.859058	1.19486	0.58962	0.902525	0.262384	0.27665	0.307342	0.673854	0.601395	0.884925	0.327862	0.236259		0.593061	0.0916687
0.880429	1.23365	0.608366	0.929302	0.269787	0.285486	0.328238	0.694329	0.619841	0.913926	0.334783	0.243855		0.611833	0.0943006
0.901537	1.27319	0.627407	0.955631	0.277236	0.294437	0.350012	0.715136	0.638443	0.943063	0.34187	0.252046		0.630834	0.0969258
0.922095	1.31342	0.646594	0.981557	0.284785	0.303574	0.372498	0.73589	0.656659	0.972616	0.349113	0.260691		0.649958	0.0995484
0.94244	1.35415	0.66589	1.00757	0.292072	0.312892	0.395914	0.756831	0.674422	1.00263	0.356469	0.269478		0.66923	0.102198
0.962598	1.39544	0.685691	1.03345	0.299055	0.322377	0.420301	0.778138	0.692035	1.03298	0.363874	0.278249		0.688682	0.104878
0.982652	1.43669	0.705952	1.05939	0.305983	0.332111	0.445612	0.799842	0.709555	1.06371	0.371255	0.286926		0.708306	0.107567
1.00274	1.47711	0.726718	1.08547	0.31296	0.342103	0.471926	0.821938	0.726891	1.09512	0.37894	0.29514		0.728088	0.110234
1.02254	1.51648	0.748035	1.11148	0.320025	0.352479	0.499396	0.844544	0.743605	1.12687	0.386678	0.30313		0.747938	0.112842
1.04195	1.55483	0.769291	1.13744	0.327279	0.363106	0.527825	0.868346	0.759582	1.15892	0.393938	0.311193		0.767808	0.115406
1.0609	1.59235	0.789994	1.16331	0.334696	0.374039	0.556873	0.893021	0.775315	1.19091	0.400648	0.319841		0.787658	0.117915
1.07928	1.62967	0.810189	1.18901	0.342109	0.385226	0.58651	0.918678	0.790891	1.22264	0.407083	0.329224		0.807542	0.12039
1.09708	1.66779	0.830341	1.21453	0.349683	0.396596	0.616635	0.945598	0.806127	1.25457	0.413476	0.338285		0.827559	0.122924
1.11496	1.70669	0.850657	1.24028	0.357441	0.408461	0.647143	0.972949	0.821215	1.28634	0.419787	0.346811		0.847728	0.125521
1.13343	1.74545	0.871182	1.2659	0.365146	0.420755	0.678173	1.00044	0.836647	1.31793	0.425971	0.355335		0.868031	0.128122
1.15199	1.78349	0.891988	1.29103	0.373171	0.433483	0.709551	1.02817	0.852313	1.3496	0.43219	0.363876		0.888404	0.130674
1.17058	1.82062	0.912777	1.31612	0.381774	0.446689	0.740789	1.05592	0.86778	1.38103	0.438538	0.372641		0.908772	0.133153
1.18918	1.85746	0.933567	1.34083	0.390601	0.460248	0.772124	1.08349	0.88277	1.41204	0.444895	0.382051		0.929105	0.13558
1.20771	1.89614	0.954296	1.36507	0.399528	0.474098	0.803864	1.11145	0.897027	1.4429	0.451221	0.39233		0.949635	0.13807
1.22651	1.93766	0.974788	1.38923	0.40862	0.488184	0.835762	1.14027	0.911164	1.47376	0.457535	0.403165		0.970555	0.140707
1.24527	1.98101	0.995485	1.41333	0.417744	0.502518	0.867763	1.16922	0.925352	1.50479	0.464117	0.414028		0.991719	0.143446
1.26386	2.02558	1.01691	1.43726	0.426994	0.5171	0.900056	1.19798	0.939254	1.53639	0.470996	0.424459		1.01307	0.146269
1.28268	2.07082	1.03909	1.46076	0.436617	0.531814	0.932887	1.22693	0.953139	1.56833	0.477797	0.434667		1.03463	0.149141
1.30165	2.1158	1.06169	1.48423	0.446489	0.546173	0.966256	1.25611	0.966908	1.60041	0.484437	0.445824		1.05633	0.152001
1.32055	2.1604	1.08412	1.50791	0.456478	0.560036	1.00003	1.2858	0.980326	1.6329	0.490951	0.458268		1.07815	0.154852
1.33941	2.20442	1.10591	1.53197	0.466786	0.573687	1.03416	1.31627	0.993035	1.66566	0.497355	0.471812		1.10004	0.157682
1.35826	2.24712	1.12744	1.55648	0.477487	0.587206	1.06896	1.34722	1.00498	1.69848	0.503521	0.486373		1.12196	0.160445
1.37695	2.28889	1.14903	1.58114	0.488295	0.600495	1.10503	1.37854	1.01659	1.73141	0.509412	0.501441		1.14393	0.163181
1.39577	2.33084	1.17065	1.60632	0.499225	0.613423	1.14179	1.4103	1.02832	1.76459	0.515058	0.516675		1.16608	0.165977
1.41479	2.37265	1.19205	1.6319	0.510336	0.62621	1.1781	1.4425	1.04043	1.798	0.520516	0.531821		1.18828	0.16881
1.43373	2.41401	1.21313	1.65754	0.521427	0.638929	1.21445	1.4751	1.05256	1.83143	0.525977	0.546832		1.21043	0.17165
1.45324	2.45549	1.23436	1.68299	0.532532	0.651554	1.25141	1.50803	1.06479	1.86488	0.531421	0.562236		1.23274	0.17451
1.4735	2.49702	1.25555	1.70838	0.543501	0.664174	1.28868	1.54155	1.07716	1.89812	0.536837	0.578096		1.25521	0.177389
1.49403	2.53851	1.27655	1.73424	0.554391	0.676851	1.32631	1.57514	1.08955	1.93087	0.542333	0.593442		1.27768	0.180297
1.51464	2.5804	1.29713	1.75998	0.565392	0.689991	1.36428	1.60846	1.10209	1.96318	0.547932	0.608317		1.30015	0.183219
1.53508	2.62267	1.31719	1.78526	0.576431	0.703624	1.4021	1.64197	1.1147	1.99526	0.553679	0.623312		1.32261	0.186141
1.55523	2.66601	1.3377	1.81035	0.587459	0.717492	1.43968	1.67511	1.12786	2.02725	0.559701	0.63799		1.34515	0.189109
1.57505	2.7119	1.35883	1.83503	0.598063	0.731423	1.47733	1.70738	1.14163	2.05899	0.566026	0.652765		1.36787	0.192191
1.59453	2.75992	1.38007	1.85942	0.608415	0.745283	1.51495	1.73898	1.15537	2.09082	0.572784	0.667736		1.39069	0.195374
1.61385	2.80846	1.40148	1.88352	0.618816	0.759339	1.55276	1.76989	1.16914	2.12242	0.580031	0.682189		1.41349	0.198569
1.633	2.85719	1.42295	1.90693	0.629096	0.773474	1.59143	1.79981	1.18307	2.15279	0.587731	0.69665		1.43618	0.201717
1.65195	2.90561	1.44438	1.92955	0.639517	0.787476	1.63082	1.82903	1.19721	2.18204	0.596051	0.71166		1.45877	0.204773
1.67065	2.95296	1.46609	1.95167	0.650021	0.801421	1.67035	1.85778	1.21151	2.21037	0.604943	0.727011		1.48123	0.207714
1.68913	2.99991	1.48788	1.97346	0.660443	0.815201	1.70991	1.88577	1.22553	2.23812	0.614277	0.742798		1.50354	0.210598
1.70776	3.04659	1.50936	1.99482	0.670763	0.828946	1.74922	1.91373	1.23908	2.2659	0.623869	0.759378		1.52578	0.213451
1.72665	3.09236	1.5312	2.01589	0.680804	0.842624	1.78848	1.94189	1.25237	2.29345	0.633915	0.775816		1.54795	0.216264
1.74579	3.13754	1.55395	2.03663	0.690454	0.856189	1.8284	1.97001	1.26551	2.32028	0.644794	0.791037		1.57005	0.219062
1.76518	3.18258	1.57709	2.05689	0.699672	0.869868	1.86887	1.99886	1.27838	2.34632	0.656328	0.805416		1.59212	0.221868
1.78476	3.22762	1.59996	2.07695	0.708535	0.883672	1.90892	2.02876	1.29089	2.37188	0.66836	0.81905		1.61411	0.2247
1.80449	3.27323	1.62247	2.09675	0.716817	0.897712	1.94833	2.05945	1.3033	2.39676	0.680699	0.832		1.636	0.227581
1.82412	3.3193	1.64475	2.11629	0.724489	0.911943	1.9877	2.09095	1.31576	2.4208	0.693317	0.844738		1.65785	0.230495
1.84372	3.36494	1.66691	2.13582	0.731981	0.926288	2.02724	2.12335	1.32823	2.44436	0.706248	0.857015		1.67968	0.233407
1.86334	3.41098	1.68868	2.15528	0.73927	0.940898	2.06664	2.15643	1.34075	2.4679	0.71938	0.868358		1.70149	0.236378
1.88271	3.4574	1.70978	2.17453	0.746239	0.955853	2.10585	2.19036	1.35335	2.49172	0.732711	0.878982		1.72329	0.23941
1.9016	3.50277	1.73076	2.1934	0.753143	0.971234	2.14507	2.22525	1.36629	2.51531	0.746291	0.88918		1.74502	0.24239
1.91998	3.54807	1.75165	2.21191	0.7599	0.986953	2.18421	2.26034	1.37963	2.53837	0.760052	0.899131		1.76668	0.245353
1.93832	3.59428	1.77174	2.23008	0.766434	1.00301	2.22329	2.29535	1.39336	2.56126	0.773388	0.909203		1.78831	0.248374
1.95678	3.6405	1.79066	2.24773	0.773041	1.01927	2.26197	2.33002	1.40764	2.58416	0.7865	0.919378		1.8098	0.251382
1.97534	3.6863	1.80839	2.26499	0.779798	1.03549	2.29957	2.36414	1.42234	2.60712	0.799964	0.929637		1.83109	0.254331
1.99416	3.73166	1.82535	2.28182	0.786886	1.05176	2.3362	2.39809	1.43756	2.63026	0.813606	0.940172		1.85229	0.257221
2.01313	3.77594	1.84171	2.29834	0.794477	1.06798	2.3723	2.43185	1.45326	2.65366	0.827634	0.951123		1.87345	0.260009
2.03217	3.81987	1.85747	2.31442	0.802428	1.08405	2.40821	2.46558	1.4693	2.67763	0.842026	0.962325		1.89462	0.262764
2.05124	3.86449	1.87307	2.32995	0.810471	1.09995	2.4441	2.49884	1.48579	2.70254	0.856653	0.973457		1.91588	0.265563
2.07063	3.90829	1.88863	2.34528	0.818346	1.11564	2.48008	2.53113	1.50272	2.72788	0.871713	0.984844		1.9371	0.268304
2.09066	3.95119	1.90401	2.36044	0.826068	1.13121	2.51569	2.56314	1.51983	2.75318	0.887279	0.996465		1.95826	0.270978
2.11144	3.99463	1.9193	2.37557	0.833602	1.14655	2.55081	2.59481	1.5368	2.77878	0.903465	1.00786		1.97947	0.273685
2.13276	4.038	1.93485	2.39084	0.840869	1.16153	2.58622	2.62616	1.55405	2.80455	0.920467	1.01888		2.00077	0.276403
2.1541	4.0806	1.95104	2.40623	0.847984	1.17574	2.62183	2.65731	1.57165	2.83038	0.938523	1.02984		2.0221	0.279073
2.17554	4.12339	1.96805	2.42198	0.855099	1.18938	2.65766	2.68814	1.58925	2.85632	0.956927	1.04172		2.04362	0.281744
2.19723	4.16684	1.98581	2.43795	0.862217	1.20305	2.69465	2.71902	1.60713	2.88218	0.97507	1.05453		2.06547	0.284456
2.21893	4.21063	2.00376	2.45401	0.869425	1.21657	2.73314	2.74983	1.62509	2.90791	0.993445	1.06753		2.08752	0.287205
2.2408	4.25533	2.02158	2.47027	0.876855	1.22987	2.77212	2.78047	1.64288	2.93342	1.01221	1.08035		2.10968	0.290009
2.26301	4.29999	2.03924	2.48674	0.884466	1.24317	2.81029	2.81093	1.66036	2.95858	1.03142	1.09324		2.13178	0.292781
2.28548	4.34337	2.05715	2.5036	0.892287	1.25676	2.84788	2.84175	1.67761	2.98311	1.05098	1.10683		2.1539	0.295436
2.3081	4.3866	2.07602	2.52072	0.900419	1.27065	2.88543	2.87314	1.69503	3.00704	1.07079	1.12084		2.17623	0.298048
2.33072	4.43075	2.09551	2.53799	0.909039	1.28449	2.92333	2.90412	1.71281	3.0307	1.0907	1.13476		2.19874	0.300692
2.35313	4.47519	2.11525	2.55544	0.918194	1.29838	2.96162	2.93452	1.73135	3.05398	1.11027	1.14882		2.22135	0.303327
2.37499	4.51902	2.13506	2.573	0.927795	1.31264	2.99989	2.96443	1.75041	3.0769	1.12973	1.16331		2.24393	0.305877
2.39658	4.56285	2.15472	2.59071	0.93743	1.32758	3.03796	2.99408	1.76978	3.09942	1.14926	1.17781		2.26651	0.308396
2.41829	4.60652	2.17419	2.60847	0.946882	1.34297	3.07542	3.0236	1.7897	3.12154	1.16884	1.19169		2.28901	0.310894
2.43996	4.64968	2.1936	2.62632	0.95638	1.35843	3.11252	3.05235	1.80995	3.14321	1.18888	1.20548		2.3114	0.313323
2.46182	4.69253	2.21374	2.64437	0.965711	1.37406	3.14983	3.0799	1.83082	3.16433	1.20946	1.21972		2.33386	0.31568
2.48362	4.73373	2.23485	2.66258	0.975054	1.38988	3.18778	3.10678	1.85276	3.18509	1.23042	1.23449		2.35642	0.317898
2.50466	4.774	2.25644	2.681	0.984543	1.40588	3.22681	3.13351	1.87576	3.20556	1.25155	1.24978		2.37913	0.320041
2.5254	4.81478	2.27824	2.69933	0.994142	1.42206	3.2661	3.16019	1.89953	3.22588	1.27317	1.26502		2.40199	0.322191
2.54621	4.85549	2.29994	2.71753	1.00428	1.43829	3.30496	3.18676	1.92354	3.2459	1.29537	1.28001		2.42486	0.324297
2.56691	4.89608	2.32168	2.7358	1.01491	1.45472	3.34373	3.21345	1.94802	3.26547	1.31768	1.2949		2.44778	0.326368
2.58785	4.93709	2.34351	2.75416	1.02591	1.47128	3.38254	3.24062	1.97286	3.28461	1.34027	1.30977		2.47087	0.328446
2.60923	4.97931	2.36522	2.77276	1.03746	1.48788	3.42115	3.26743	1.99775	3.30317	1.36322	1.32484		2.49412	0.330548
2.6308	5.02179	2.38724	2.7914	1.05017	1.50474	3.45999	3.29396	2.02285	3.32125	1.38646	1.34037		2.51758	0.332595
2.65232	5.06399	2.4103	2.81016	1.06426	1.52164	3.49961	3.32117	2.04795	3.33891	1.41047	1.3564		2.54143	0.334573
2.6736	5.10593	2.43419	2.82906	1.07929	1.53835	3.5394	3.34899	2.07314	3.3561	1.43511	1.37283		2.5655	0.336493
2.69461	5.1471	2.45797	2.84783	1.09518	1.55508	3.5789	3.37795	2.09842	3.37271	1.45997	1.38949		2.5896	0.338338
2.71556	5.18942	2.48168	2.86686	1.11177	1.57202	3.61822	3.4078	2.12353	3.38865	1.48505	1.40605		2.61388	0.34023
2.73703	5.23317	2.50569	2.8863	1.12897	1.58901	3.65725	3.43765	2.1486	3.40399	1.50995	1.42259		2.63835	0.342182
2.75872	5.27768	2.52982	2.90623	1.14659	1.60586	3.69623	3.46741	2.17315	3.41882	1.53425	1.43943		2.66285	0.34418
2.78016	5.32339	2.55369	2.9267	1.16433	1.62279	3.7356	3.49723	2.19683	3.43331	1.55831	1.45683		2.68743	0.346258
2.80152	5.36987	2.5774	2.9474	1.18232	1.6399	3.77518	3.52718	2.21968	3.44729	1.58252	1.47513		2.71212	0.348357
2.8229	5.41649	2.60189	2.96827	1.20047	1.65724	3.8148	3.55735	2.2419	3.46061	1.60648	1.49419		2.73688	0.35045
2.84456	5.4631	2.62767	2.98937	1.2186	1.67471	3.85459	3.58839	2.2639	3.4736	1.6305	1.51374		2.76189	0.352549
2.86621	5.51053	2.65429	3.01092	1.23655	1.69217	3.89447	3.61957	2.28558	3.48624	1.65509	1.53374		2.78711	0.354689
2.88754	5.55668	2.68126	3.03275	1.25404	1.70987	3.93432	3.65019	2.30692	3.4984	1.67957	1.55392		2.81212	0.356756
2.90881	5.60072	2.7086	3.05453	1.27124	1.7279	3.97417	3.68054	2.32808	3.51024	1.70368	1.57418		2.83689	0.358711
2.92997	5.64541	2.7367	3.07629	1.28835	1.74625	4.01405	3.71058	2.34893	3.52174	1.72748	1.59462		2.8617	0.360703
2.95062	5.69058	2.76578	3.09767	1.30524	1.76475	4.05389	3.74064	2.36961	3.53276	1.7507	1.61529		2.88646	0.362734
2.97067	5.73527	2.79577	3.1186	1.32209	1.78337	4.09394	3.77086	2.39032	3.54339	1.77395	1.63612		2.9112	0.364739
2.99019	5.77923	2.82683	3.1393	1.33902	1.80225	4.13425	3.80128	2.41157	3.5537	1.7977	1.6569		2.93602	0.366689
3.00889	5.82291	2.85897	3.15977	1.35593	1.82108	4.17448	3.83161	2.43378	3.56362	1.82166	1.67712		2.96082	0.368622
3.02677	5.86643	2.89136	3.18054	1.3728	1.83984	4.21465	3.86125	2.45671	3.5734	1.84621	1.69674		2.98556	0.37054
3.04382	5.90985	2.92378	3.20156	1.38969	1.85856	4.25479	3.89034	2.48002	3.58315	1.87131	1.71669		3.0103	0.372428
3.0601	5.95309	2.95661	3.22267	1.40703	1.87732	4.29482	3.9194	2.50345	3.59279	1.89607	1.73725		3.03505	0.374288
3.0761	5.99509	2.9896	3.2439	1.42483	1.89618	4.33449	3.9489	2.5271	3.60225	1.92026	1.75821		3.05974	0.376066
3.09183	6.03886	3.0227	3.265	1.44295	1.91503	4.37404	3.97886	2.55089	3.61151	1.94452	1.77957		3.08465	0.37794
3.10716	6.08524	3.05613	3.2863	1.46143	1.93398	4.41352	4.0095	2.57474	3.62075	1.96935	1.8007		3.1099	0.379971
3.12189	6.13045	3.08987	3.30788	1.48012	1.95296	4.45239	4.04066	2.59869	3.63002	1.9946	1.82186		3.13511	0.38192
3.13646	6.1741	3.12391	3.32965	1.49912	1.97205	4.4911	4.07186	2.62253	3.63941	2.02044	1.84391		3.16038	0.38374
3.15114	6.21752	3.15808	3.35154	1.51815	1.99126	4.52963	4.10264	2.64606	3.64902	2.04661	1.86653		3.18568	0.385527
3.16589	6.26194	3.19245	3.37344	1.53721	2.01046	4.56779	4.13313	2.6694	3.65871	2.07254	1.88945		3.21103	0.387371
3.18076	6.3065	3.22748	3.39535	1.55646	2.02988	4.60555	4.16412	2.69239	3.66827	2.09797	1.91315		3.23649	0.389216
3.1956	6.35043	3.2636	3.41697	1.57586	2.04943	4.64297	4.19587	2.71442	3.67773	2.12265	1.93765		3.26193	0.391037
3.2108	6.39462	3.30041	3.43877	1.59561	2.06913	4.68053	4.22841	2.73569	3.6872	2.14769	1.96248		3.28761	0.392882
3.22628	6.43884	3.33697	3.46066	1.61525	2.08889	4.71763	4.261	2.75661	3.69653	2.17351	1.98689		3.31326	0.394728
3.24192	6.4844	3.374	3.48257	1.63493	2.10869	4.75504	4.29422	2.7774	3.70584	2.19968	2.01058		3.3391	0.396697
3.2577	6.5298	3.41106	3.50466	1.65424	2.12842	4.79244	4.32764	2.79806	3.71514	2.22572	2.03379		3.36489	0.398704
3.27335	6.57474	3.44777	3.52672	1.67312	2.1481	4.82949	4.36049	2.81856	3.72435	2.25155	2.05708		3.39044	0.400693
3.28917	6.62127	3.48499	3.54902	1.6924	2.16799	4.86728	4.39361	2.83912	3.73355	2.2774	2.08051		3.41636	0.402794
3.30493	6.66768	3.52184	3.57141	1.71159	2.18764	4.90457	4.42634	2.85947	3.74251	2.30265	2.10348		3.44201	0.404914
3.3206	6.71503	3.55926	3.59462	1.73123	2.20752	4.94227	4.46017	2.88029	3.75136	2.32829	2.12686		3.46812	0.407093
3.33585	6.76165	3.59618	3.61793	1.75094	2.22715	4.97971	4.494	2.90085	3.75989	2.35396	2.15013		3.49402	0.409241
3.35129	6.80867	3.63299	3.6417	1.77098	2.24678	5.01755	4.52805	2.92179	3.76829	2.37993	2.17326		3.52011	0.411422
3.36691	6.8567	3.66995	3.66591	1.79111	2.26651	5.05571	4.56272	2.94378	3.77662	2.4062	2.19618		3.54652	0.41368
3.38193	6.90347	3.70609	3.68931	1.81004	2.28565	5.09268	4.5966	2.96582	3.78468	2.4315	2.21778		3.57213	0.415927
3.3974	6.95172	3.74373	3.71375	1.82942	2.30551	5.13143	4.63257	2.98893	3.79294	2.45705	2.23973		3.59868	0.418313
3.41193	6.99625	3.77872	3.73697	1.84791	2.32432	5.16773	4.66652	3.01082	3.80061	2.48081	2.26087		3.62362	0.420493
3.42727	7.04332	3.81564	3.76164	1.86799	2.3442	5.2058	4.70241	3.03401	3.80866	2.5055	2.28349		3.64999	0.422785
3.44226	7.08915	3.8519	3.786	1.88793	2.36355	5.24309	4.73786	3.05664	3.81636	2.52917	2.30567		3.6758	0.425037
3.45666	7.13286	3.88609	3.80953	1.9068	2.38182	5.27844	4.77165	3.07819	3.82358	2.55146	2.32669		3.70031	0.427205
3.47438	7.18705	3.92727	3.83811	1.92935	2.40381	5.32124	4.81295	3.10422	3.83229	2.57812	2.35102		3.72998	0.429971
3.48542	7.22075	3.95274	3.85576	1.94323	2.41739	5.34772	4.83865	3.12027	3.83765	2.59446	2.3657		3.74831	0.431719
