# Supplementary material for: How spatial release from masking may fail to function in a highly directional auditory system
Source: eLife. 2017 Apr 25;6:e20731. doi: 10.7554/eLife.20731 (PMC5443663; doi:10.7554/eLife.20731)
Supplement: Figure 5—source data 7. — The target signal was presented at 76 dB SPL from a forward speaker while two coherent maskers were presented at the same combined intensity from lateral speakers to the left and right of the signal speaker. ‘X’ and ‘Y’ coordinates of virtual walking paths measured from the treadmill system. Data plotted in Figure 5G. DOI: http://dx.doi.org/10.7554/eLife.20731.023 [file elife-20731-fig5-data7.xlsx]

## Sheet: noise both 90 x
fly1	fly2	fly3	fly4	fly5	fly6	fly7	fly8	fly9	fly10	fly11	fly12		Avg	SEM
8.10512e-08	1.49308e-07	-2.44958e-07	4.94412e-07	-2.07663e-07	2.07879e-07	4.14018e-08	-5.88144e-07	2.44634e-07	3.4161e-08	1.89117e-07	-4.81835e-05		-3.98186e-06	4.01913e-06
-1.18399e-07	-1.33861e-07	1.82736e-07	-6.96248e-07	2.26759e-07	-3.17065e-07	2.34032e-07	-8.07084e-08	-2.51445e-07	-3.29067e-08	-2.07933e-07	-0.000137024		-1.15183e-05	1.14099e-05
1.09229e-07	6.67734e-08	-3.07294e-08	8.41357e-07	-1.76227e-07	3.59277e-07	-3.70215e-07	-2.42756e-07	1.88966e-07	1.96347e-08	2.46156e-07	-0.000224427		-1.8618e-05	1.87101e-05
1.68621e-07	3.4979e-08	-1.7442e-07	-9.97328e-07	5.21887e-08	-3.05359e-07	4.05401e-07	-1.83512e-06	-3.87507e-08	6.08838e-09	-1.38248e-07	-0.000335911		-2.82277e-05	2.79717e-05
-2.59327e-07	-1.69517e-07	4.15948e-07	3.16038e-07	1.45363e-07	1.47151e-07	-1.08989e-06	1.15362e-06	-6.91218e-08	-2.87834e-08	-3.07719e-07	-0.000406054		-3.38167e-05	3.38401e-05
-8.60381e-07	3.09594e-07	-6.25098e-07	-9.52943e-07	-3.66023e-07	8.94491e-08	-6.1904e-07	-5.51498e-06	3.18015e-07	4.51995e-08	-4.29838e-07	-0.000467346		-3.96627e-05	3.88829e-05
-1.42934e-06	-5.60097e-07	8.7081e-07	-2.07255e-06	6.43863e-07	-4.47801e-07	-2.80954e-06	1.30166e-05	-8.20342e-07	-5.17619e-08	-2.23021e-06	-0.000544537		-4.50356e-05	4.54251e-05
-3.91581e-06	7.68207e-07	-9.86744e-07	-7.61296e-07	-8.19703e-07	1.11722e-06	-3.38293e-06	6.1607e-05	2.92003e-07	1.18169e-07	-1.1811e-06	-0.00063293		-4.83396e-05	5.33987e-05
-4.78137e-06	1.12119e-07	-3.78979e-07	-7.5236e-06	4.52458e-07	-1.06632e-06	-7.77444e-06	0.000148356	-2.8308e-06	-2.64722e-07	-6.3711e-06	-0.000720183		-5.01878e-05	6.2197e-05
-1.16082e-05	6.5102e-07	-8.33196e-07	3.68581e-05	-8.17667e-07	1.64164e-06	1.6376e-05	0.000261161	-2.06705e-06	-1.22614e-07	5.19684e-07	-0.000783143		-4.01153e-05	7.09234e-05
6.15942e-06	1.85898e-06	-3.1679e-06	0.000101567	-1.47914e-06	-9.39771e-07	0.000136777	0.000327284	-7.43947e-06	-4.86143e-07	5.80936e-05	-0.000835207		-1.80817e-05	7.94523e-05
0.000185703	5.20519e-07	6.91929e-07	0.000199751	-8.16763e-07	4.66401e-07	0.0003221	0.000474334	-6.96589e-06	-6.4968e-07	0.000192242	-0.000754992		5.1032e-05	8.61155e-05
0.0005192	7.75702e-06	-7.33464e-06	0.000431369	-6.96567e-06	5.76878e-07	0.000649462	0.000777746	5.50718e-05	1.7142e-07	0.00042622	-0.000553844		0.000191619	0.000107778
0.000940265	-2.1985e-05	3.23047e-05	0.000753531	9.49468e-06	-4.09608e-05	0.00118285	0.00114517	0.000174951	-2.4739e-06	0.000758633	-0.000246192		0.000390465	0.000150829
0.00169646	-0.000127531	0.000175613	0.0012421	5.78749e-05	-7.97918e-05	0.0018696	0.00163626	0.000433705	1.69289e-05	0.00124231	0.000250631		0.00070118	0.000222674
0.00288566	-0.000245664	0.000371967	0.00196746	0.000148803	-8.28405e-05	0.00281403	0.00236561	0.00096083	7.36068e-05	0.00200824	0.000931654		0.00118328	0.000336744
0.00449988	-0.000351801	0.000539536	0.00287678	0.000310301	-7.04936e-05	0.00397773	0.00332234	0.0017874	0.00012704	0.00311492	0.00185521		0.0018324	0.00049209
0.00676655	-0.000614228	0.000689178	0.00407105	0.000620067	-5.72944e-05	0.00530246	0.00448454	0.00300537	0.000162919	0.00456348	0.0031553		0.00267912	0.000704611
0.00959533	-0.00108809	0.000832199	0.00559263	0.00111314	-1.32213e-05	0.00685288	0.00588919	0.00469112	0.000182008	0.00637409	0.00490421		0.00374379	0.000979473
0.0129568	-0.00160763	0.000887606	0.00732204	0.0017261	5.77109e-05	0.0085942	0.00757152	0.00689504	0.000169302	0.00856082	0.00692263		0.00500468	0.0013121
0.0170856	-0.00225333	0.000891088	0.00925448	0.00247305	0.000141958	0.0104947	0.0096162	0.00982285	0.000149398	0.0112096	0.00925587		0.00651179	0.00172147
0.0219897	-0.0031336	0.000784245	0.0114776	0.00333035	0.000246363	0.0124278	0.0120194	0.0135694	8.97828e-05	0.0143857	0.0119947		0.00826512	0.00222076
0.0276267	-0.00409608	0.000541	0.0139419	0.004288	0.000344383	0.014339	0.0146329	0.018138	-1.61654e-05	0.0181436	0.014912		0.0102329	0.00280274
0.0339857	-0.00513155	0.00018926	0.0166107	0.00526687	0.000538492	0.0161862	0.0174541	0.0236157	-5.35482e-05	0.0225327	0.0181083		0.0124419	0.00346815
0.0410454	-0.00631932	-0.000457776	0.0195438	0.00610455	0.000742844	0.0178621	0.0206426	0.030011	-1.95801e-05	0.0275431	0.021543		0.0148535	0.00423343
0.0486423	-0.0075343	-0.00134843	0.0226399	0.0067412	0.000900743	0.0194146	0.0241602	0.0372257	8.90116e-06	0.0332017	0.0250534		0.0174255	0.00508721
0.0566475	-0.00871842	-0.00231168	0.0258649	0.00708832	0.0010998	0.0207849	0.0278134	0.0451114	-2.39258e-06	0.0394456	0.0288431		0.0201389	0.00601285
0.0649414	-0.00996058	-0.00328737	0.0292677	0.00712435	0.00119135	0.0219933	0.031551	0.053677	-5.22576e-05	0.0462932	0.0329293		0.0229724	0.00701255
0.0733578	-0.0111451	-0.00430444	0.0327286	0.00667021	0.00120818	0.0231112	0.0354015	0.0628455	-0.000114006	0.0536957	0.0372603		0.025893	0.00807372
0.081926	-0.0122821	-0.00540998	0.0362121	0.00565439	0.00117299	0.0240233	0.0393637	0.0724579	-0.000178091	0.0616549	0.0418494		0.0288704	0.00919658
0.0905886	-0.0134929	-0.00652442	0.0397257	0.00421229	0.00111759	0.0247431	0.0433123	0.0824615	-0.000267208	0.0704506	0.0466619		0.0319158	0.0103841
0.0991853	-0.0145442	-0.0076662	0.0431957	0.00217766	0.00102146	0.0252982	0.0472157	0.0926422	-0.000379217	0.0800137	0.0515943		0.0349796	0.0116167
0.107601	-0.0153552	-0.00881626	0.046555	-0.000458435	0.000749013	0.0256376	0.0512052	0.102965	-0.000429926	0.0902036	0.0566751		0.0380443	0.0128868
0.11581	-0.0161469	-0.00994519	0.0498684	-0.00365764	0.000379133	0.0257911	0.055327	0.113377	-0.000484683	0.100885	0.0621431		0.0411122	0.0141982
0.123803	-0.0168759	-0.0109901	0.0531846	-0.00741	-0.000181347	0.0257961	0.0595429	0.123772	-0.000701765	0.111969	0.0678758		0.0441487	0.0155461
0.131605	-0.017297	-0.0117459	0.0563376	-0.0115148	-0.000872509	0.0256358	0.0637034	0.134134	-0.00107491	0.123608	0.0737761		0.0471911	0.0169156
0.139039	-0.017595	-0.0122395	0.05935	-0.0159221	-0.00167853	0.0252796	0.0679265	0.144238	-0.0014973	0.135745	0.0799778		0.0502185	0.0182968
0.146001	-0.0181065	-0.0126417	0.0623267	-0.0205733	-0.00268208	0.0246847	0.072529	0.154058	-0.00189907	0.148214	0.0864214		0.0531943	0.0196959
0.152715	-0.0187171	-0.0129606	0.0652409	-0.0254859	-0.00373093	0.023831	0.0775363	0.163651	-0.00235699	0.160892	0.0931338		0.0561457	0.0211164
0.158948	-0.019303	-0.0131017	0.0681401	-0.0306678	-0.00492788	0.0226461	0.0828856	0.173071	-0.00291859	0.1739	0.100031		0.0590586	0.0225553
0.164684	-0.0199543	-0.0130919	0.071087	-0.0360129	-0.00628686	0.0211549	0.0886169	0.182297	-0.00361555	0.187189	0.106939		0.0619172	0.0240102
0.17004	-0.0207986	-0.0129467	0.073996	-0.0414782	-0.00773545	0.0194484	0.0947255	0.19111	-0.00437873	0.200415	0.113869		0.0646889	0.0254623
0.174888	-0.0220925	-0.012597	0.0766374	-0.046998	-0.00914846	0.017449	0.101041	0.199435	-0.00525202	0.213538	0.120704		0.0673003	0.0269019
0.17919	-0.0239351	-0.011963	0.0792002	-0.0526645	-0.0103683	0.0152366	0.107431	0.207327	-0.0063627	0.226533	0.12758		0.0697671	0.0283327
0.182753	-0.0261496	-0.0110253	0.0819076	-0.0583825	-0.0115347	0.0128455	0.113882	0.214831	-0.0075289	0.239373	0.13473		0.0721418	0.0297459
0.185639	-0.0287928	-0.00992699	0.0846101	-0.0640759	-0.0125626	0.0101956	0.120407	0.221716	-0.00889739	0.252065	0.142106		0.0743737	0.0311405
0.187775	-0.0319897	-0.00879532	0.0874563	-0.0699828	-0.0133563	0.00739622	0.12707	0.227981	-0.0105049	0.264421	0.149819		0.0764407	0.0325225
0.18928	-0.0354303	-0.00773011	0.0904038	-0.0760844	-0.0140006	0.00447337	0.133845	0.233875	-0.0122004	0.276216	0.157624		0.0783559	0.0338832
0.190289	-0.0388706	-0.00660754	0.0931323	-0.0823941	-0.0144371	0.001451	0.140599	0.239312	-0.0140939	0.287554	0.165196		0.0800941	0.0352126
0.190562	-0.0425179	-0.00537044	0.0957781	-0.0888545	-0.0146684	-0.00161168	0.147307	0.244237	-0.0160817	0.298482	0.172563		0.081652	0.0365056
0.190433	-0.0465009	-0.00424983	0.0984711	-0.0953407	-0.0146486	-0.00461342	0.153912	0.248571	-0.0181663	0.308731	0.179554		0.0830127	0.0377527
0.190002	-0.0505644	-0.00309825	0.101207	-0.101975	-0.014343	-0.00748557	0.160336	0.252315	-0.0203099	0.318373	0.186352		0.084234	0.0389539
0.189227	-0.054516	-0.00179946	0.104159	-0.108783	-0.0138666	-0.0102987	0.166689	0.255675	-0.0225287	0.327533	0.19338		0.0854058	0.0401295
0.188195	-0.0584073	-0.000451298	0.107449	-0.115715	-0.0133373	-0.0129884	0.173121	0.258587	-0.0248282	0.336204	0.20061		0.0865366	0.0412843
0.186803	-0.0622509	0.000954628	0.110845	-0.12262	-0.0128003	-0.0155484	0.179731	0.260874	-0.0271213	0.344499	0.207831		0.0875997	0.042407
0.185309	-0.0659948	0.00241035	0.114088	-0.129562	-0.0121668	-0.0180482	0.186385	0.262512	-0.0295427	0.352476	0.214827		0.0885577	0.0435004
0.183751	-0.0695226	0.00404389	0.117315	-0.136543	-0.0114983	-0.0204673	0.193087	0.263637	-0.0317798	0.360054	0.221679		0.0894797	0.0445576
0.182026	-0.072978	0.00589241	0.120508	-0.1433	-0.0108767	-0.0227802	0.199916	0.264239	-0.0337473	0.36723	0.22856		0.0903908	0.0455744
0.180126	-0.0766315	0.00797974	0.123675	-0.149899	-0.0102162	-0.0249776	0.206567	0.264265	-0.0356289	0.374223	0.235342		0.0912353	0.0465631
0.178004	-0.0804544	0.0103754	0.127103	-0.156344	-0.00952532	-0.0270855	0.213124	0.263846	-0.0372719	0.380914	0.241915		0.09205	0.0475183
0.175825	-0.0841796	0.0131013	0.130613	-0.162635	-0.00878829	-0.0290744	0.219643	0.262939	-0.038648	0.387306	0.248303		0.092867	0.0484336
0.173568	-0.0874875	0.0162114	0.133881	-0.168794	-0.0079902	-0.030964	0.225899	0.261369	-0.0397599	0.393697	0.254683		0.0936928	0.0493079
0.171233	-0.0906074	0.0195864	0.136887	-0.174846	-0.00722792	-0.0328498	0.232064	0.259097	-0.0406918	0.399945	0.260953		0.0944619	0.0501492
0.168643	-0.0936182	0.0232517	0.139754	-0.180896	-0.00652265	-0.0347231	0.238133	0.256295	-0.0413632	0.406006	0.266886		0.0951537	0.0509584
0.165819	-0.0963096	0.0272412	0.14267	-0.186846	-0.00576963	-0.0365258	0.243833	0.253053	-0.0416689	0.411896	0.2727		0.0958411	0.0517257
0.16318	-0.0989804	0.0315423	0.145618	-0.192712	-0.0049712	-0.038184	0.249196	0.249394	-0.0416928	0.417529	0.278226		0.0965122	0.0524581
0.160295	-0.101547	0.0361595	0.148498	-0.198496	-0.00419523	-0.0396691	0.254444	0.245399	-0.0414365	0.422879	0.283187		0.0971265	0.0531476
0.157187	-0.103906	0.0408632	0.151307	-0.204286	-0.00334796	-0.0410219	0.25952	0.240986	-0.0409872	0.427986	0.287771		0.0976727	0.0538027
0.154203	-0.106102	0.0456456	0.154045	-0.210178	-0.00236826	-0.0422257	0.264403	0.23619	-0.0403888	0.432948	0.292125		0.0981914	0.0544408
0.151215	-0.107933	0.0505087	0.156685	-0.215942	-0.00138453	-0.0432931	0.26917	0.231049	-0.0396509	0.437725	0.296376		0.0987104	0.0550516
0.148415	-0.109546	0.0552978	0.159208	-0.221516	-0.000514139	-0.0443681	0.27348	0.225506	-0.0388893	0.442522	0.300453		0.0991706	0.0556441
0.145623	-0.111164	0.0599705	0.161737	-0.226919	0.000330638	-0.0454205	0.277343	0.219701	-0.0382295	0.447404	0.304228		0.0995503	0.0562277
0.142804	-0.112806	0.0646346	0.164436	-0.232093	0.00117647	-0.0463224	0.28113	0.213902	-0.0375302	0.452253	0.307894		0.0999564	0.0568079
0.139979	-0.114225	0.0693137	0.167201	-0.236989	0.00201873	-0.0471001	0.284679	0.208216	-0.0366334	0.457156	0.311647		0.100438	0.0573788
0.137107	-0.115476	0.0738885	0.169889	-0.241635	0.00289418	-0.0477528	0.287981	0.202444	-0.0357063	0.461928	0.315368		0.100911	0.057929
0.13428	-0.116681	0.0784009	0.172466	-0.246102	0.00371031	-0.0483664	0.291355	0.196612	-0.0347982	0.466511	0.318766		0.101346	0.0584654
0.131439	-0.117371	0.0825488	0.175023	-0.250446	0.00453143	-0.0489084	0.294718	0.190744	-0.0338824	0.47109	0.321905		0.101783	0.0589849
0.128817	-0.117606	0.0863555	0.177784	-0.254715	0.00542955	-0.0492672	0.297902	0.184825	-0.0330006	0.475765	0.325094		0.102282	0.0595005
0.126257	-0.11774	0.0901822	0.180503	-0.258583	0.00630898	-0.0494987	0.300851	0.179148	-0.0321145	0.480569	0.328091		0.102831	0.0600005
0.123783	-0.117724	0.0938867	0.182964	-0.261952	0.00705361	-0.0496858	0.303658	0.173719	-0.0312134	0.485372	0.330607		0.103372	0.060467
0.121432	-0.117464	0.0975152	0.185391	-0.265231	0.0077312	-0.0498621	0.306559	0.168446	-0.0303634	0.490152	0.332955		0.103939	0.0609309
0.119112	-0.116838	0.101111	0.187785	-0.268594	0.00846171	-0.0498122	0.309661	0.163231	-0.0294091	0.494941	0.335416		0.104589	0.0613994
0.117099	-0.116017	0.104691	0.190089	-0.272087	0.00912408	-0.0496194	0.312923	0.158051	-0.0281724	0.4995	0.337957		0.105295	0.0618655
0.114986	-0.115295	0.108148	0.192329	-0.275817	0.00970655	-0.0494267	0.316207	0.153046	-0.0268853	0.503709	0.340172		0.105907	0.062328
0.112763	-0.114772	0.111528	0.194548	-0.279757	0.0102229	-0.0490158	0.319658	0.148059	-0.0256249	0.507724	0.341924		0.106438	0.0627919
0.110607	-0.114424	0.115116	0.196841	-0.283677	0.0106972	-0.0484405	0.323248	0.143071	-0.0243414	0.511697	0.343567		0.106997	0.0632636
0.108255	-0.114037	0.118654	0.199124	-0.287407	0.0111884	-0.0477748	0.326721	0.138148	-0.0231006	0.515529	0.345228		0.107544	0.0637224
0.105811	-0.113863	0.122281	0.201195	-0.290806	0.0116112	-0.0470289	0.330196	0.133289	-0.02177	0.518949	0.346932		0.108066	0.0641557
0.10327	-0.114096	0.12602	0.202983	-0.29384	0.0119479	-0.0461701	0.333664	0.128488	-0.0202544	0.522058	0.348459		0.108544	0.0645626
0.100513	-0.11434	0.129557	0.204797	-0.296811	0.0122852	-0.0451471	0.337156	0.12366	-0.0185933	0.52502	0.349842		0.108995	0.0649579
0.0974258	-0.11483	0.133081	0.206832	-0.299705	0.012796	-0.0440369	0.340724	0.11898	-0.0167942	0.527871	0.351405		0.109479	0.0653621
0.0942667	-0.11601	0.136675	0.208895	-0.302227	0.0134616	-0.0427084	0.344194	0.114562	-0.0147609	0.530558	0.353084		0.109999	0.0657579
0.0910287	-0.117732	0.140399	0.211022	-0.304272	0.0142235	-0.0412262	0.347625	0.110613	-0.0125495	0.532858	0.354795		0.110565	0.0661283
0.0873982	-0.119779	0.144282	0.213328	-0.305853	0.0150953	-0.0398529	0.35109	0.107139	-0.0102767	0.534979	0.356519		0.111172	0.0664875
0.0836543	-0.121994	0.148425	0.215853	-0.306985	0.0160856	-0.0384618	0.354515	0.103767	-0.00774892	0.537031	0.358486		0.111886	0.0668379
0.079746	-0.124353	0.152799	0.218697	-0.307651	0.017172	-0.0369309	0.357808	0.100695	-0.00503026	0.53879	0.360621		0.112697	0.0671629
0.0755602	-0.127097	0.157115	0.221872	-0.307952	0.0181689	-0.0353461	0.361149	0.098092	-0.0022915	0.54033	0.362455		0.113505	0.0674748
0.0710396	-0.130346	0.161611	0.225509	-0.307964	0.0192276	-0.0336629	0.36479	0.09588	0.000605924	0.54182	0.363957		0.114372	0.0677943
0.06593	-0.134024	0.166425	0.229733	-0.307812	0.0204883	-0.0319746	0.368523	0.09414	0.00359846	0.543341	0.36524		0.115301	0.0681324
0.0603056	-0.138243	0.171363	0.234401	-0.307445	0.0218461	-0.0304813	0.372395	0.0928753	0.00656705	0.544763	0.366586		0.116244	0.0684975
0.0543122	-0.14295	0.176595	0.239392	-0.30669	0.0232646	-0.0289453	0.376416	0.0920359	0.00952279	0.545867	0.367932		0.117229	0.0688652
0.04791	-0.147788	0.182141	0.24464	-0.305755	0.0246302	-0.0271269	0.380326	0.0915685	0.0125211	0.546685	0.369023		0.118231	0.0692207
0.0409345	-0.152627	0.18776	0.250042	-0.304745	0.0259244	-0.0251921	0.384382	0.0915674	0.0154924	0.547441	0.370046		0.119252	0.0695913
0.0337859	-0.157473	0.193409	0.255526	-0.30369	0.0271115	-0.0231066	0.388609	0.0918284	0.0182919	0.548152	0.37087		0.120276	0.069975
0.0264637	-0.162265	0.19907	0.260993	-0.302501	0.0282188	-0.0206269	0.393008	0.0922539	0.0210395	0.548641	0.37143		0.12131	0.0703501
0.0185135	-0.167323	0.204826	0.266345	-0.300985	0.0293488	-0.0179429	0.397845	0.0931831	0.0237175	0.548948	0.371663		0.122345	0.0707317
0.0100896	-0.172536	0.210828	0.271678	-0.299243	0.0306315	-0.0153089	0.402817	0.094522	0.0264518	0.549231	0.371561		0.123393	0.0711243
0.00137074	-0.177396	0.217046	0.27706	-0.297296	0.0321256	-0.0125161	0.407767	0.0962202	0.0295613	0.54943	0.371621		0.124583	0.0715122
-0.00714251	-0.182166	0.223438	0.282393	-0.295191	0.0336052	-0.00945379	0.412812	0.0984349	0.0328811	0.549301	0.372023		0.125911	0.0718972
-0.0154787	-0.186896	0.22999	0.287686	-0.292998	0.0350906	-0.00607732	0.417943	0.100999	0.0362536	0.548952	0.372673		0.127345	0.0722877
-0.0240282	-0.191464	0.236805	0.292941	-0.290655	0.0366601	-0.00225996	0.423194	0.103976	0.039752	0.548657	0.373418		0.128916	0.0726904
-0.0327646	-0.196087	0.243887	0.298232	-0.288221	0.0382602	0.00164875	0.428579	0.107549	0.0433862	0.548495	0.374356		0.13061	0.0731279
-0.0415313	-0.200728	0.251104	0.303631	-0.285668	0.0399842	0.00547687	0.434167	0.111465	0.0470744	0.548428	0.375491		0.132408	0.0735992
-0.0501767	-0.205234	0.258411	0.309025	-0.282809	0.0418311	0.00932152	0.439863	0.115774	0.051004	0.548319	0.37642		0.134312	0.0740639
-0.0593906	-0.209598	0.265843	0.314354	-0.279608	0.0438325	0.0131061	0.445615	0.120717	0.0553985	0.548253	0.377343		0.136322	0.0745391
-0.0688884	-0.213894	0.273411	0.319662	-0.276161	0.045951	0.016936	0.451469	0.126117	0.059898	0.548281	0.378425		0.138434	0.0750386
-0.078073	-0.217827	0.280825	0.325081	-0.27251	0.0480403	0.0207902	0.457274	0.131841	0.0643283	0.548357	0.379535		0.140638	0.0755333
-0.087316	-0.221598	0.287942	0.330542	-0.268805	0.0500781	0.0246543	0.463104	0.13785	0.0687897	0.548454	0.380711		0.142867	0.0760423
-0.0965644	-0.2254	0.294853	0.335822	-0.265096	0.0521044	0.0285639	0.46891	0.144096	0.0732034	0.548631	0.381955		0.14509	0.0765706
-0.106137	-0.22874	0.301548	0.340893	-0.261259	0.0542327	0.0324165	0.474528	0.150516	0.077691	0.549174	0.383259		0.147343	0.0771068
-0.115889	-0.231742	0.30801	0.345864	-0.257277	0.0563825	0.0361999	0.480217	0.157193	0.0823794	0.549825	0.384449		0.149634	0.077647
-0.125421	-0.234361	0.31415	0.350926	-0.253272	0.0584948	0.0398958	0.486098	0.164076	0.087259	0.550224	0.385599		0.151972	0.0781785
-0.134889	-0.236439	0.319971	0.35609	-0.249337	0.0606696	0.0436567	0.49202	0.170865	0.0922773	0.550562	0.386774		0.154352	0.0787039
-0.144229	-0.238004	0.325516	0.361331	-0.245465	0.0628456	0.0475291	0.49782	0.177654	0.097284	0.550943	0.387807		0.156753	0.0792176
-0.153422	-0.239043	0.330815	0.36683	-0.241615	0.0650773	0.0514606	0.503463	0.184422	0.101935	0.551358	0.388962		0.159187	0.0797259
-0.162088	-0.239736	0.335832	0.3725	-0.237586	0.0673312	0.055495	0.509095	0.190948	0.10624	0.551886	0.390269		0.161682	0.0802206
-0.170388	-0.239918	0.340638	0.378248	-0.233392	0.0694456	0.0594844	0.514679	0.197342	0.110744	0.552612	0.391577		0.164256	0.0806971
-0.178536	-0.239761	0.345519	0.384125	-0.229122	0.0715046	0.0635972	0.520236	0.20382	0.115422	0.55352	0.393225		0.166963	0.0811822
-0.186281	-0.239506	0.350435	0.38983	-0.224605	0.0736214	0.0679318	0.525971	0.210453	0.120075	0.554474	0.395155		0.169796	0.0816632
-0.193967	-0.239061	0.355417	0.395328	-0.219869	0.0757706	0.0722359	0.53184	0.217143	0.124755	0.555297	0.39697		0.172655	0.082134
-0.201393	-0.238422	0.360583	0.400846	-0.214932	0.0778181	0.0766544	0.537844	0.22382	0.129295	0.556007	0.398704		0.175569	0.0825968
-0.208225	-0.237317	0.365822	0.406293	-0.20981	0.0798336	0.0812086	0.54387	0.230274	0.133777	0.55687	0.400452		0.178587	0.083031
-0.214457	-0.235773	0.371132	0.411599	-0.204549	0.0818684	0.0857159	0.549694	0.236437	0.138213	0.557826	0.402173		0.181657	0.0834264
-0.220219	-0.23391	0.376425	0.416773	-0.198984	0.0837808	0.0901407	0.555538	0.242515	0.142532	0.558634	0.403819		0.184754	0.083785
-0.225983	-0.231687	0.381689	0.42188	-0.193089	0.0856184	0.0944797	0.561627	0.248463	0.146924	0.559303	0.405475		0.187892	0.0841307
-0.231746	-0.229291	0.387025	0.426963	-0.187134	0.0872829	0.0988605	0.56789	0.254098	0.151653	0.559881	0.407091		0.191048	0.0844788
-0.237502	-0.226606	0.392331	0.431993	-0.181344	0.0887561	0.103311	0.574221	0.259419	0.156685	0.560413	0.408619		0.194191	0.084827
-0.243185	-0.223706	0.397477	0.436912	-0.175643	0.0902296	0.107889	0.580545	0.264471	0.161624	0.560907	0.410132		0.197304	0.0851679
-0.248729	-0.220849	0.402283	0.441719	-0.169982	0.0915987	0.112454	0.586686	0.269081	0.166657	0.561338	0.411364		0.200302	0.0854918
-0.254141	-0.2177	0.406756	0.44665	-0.164308	0.0928524	0.116789	0.592671	0.273163	0.171809	0.561776	0.412384		0.203225	0.0857953
-0.259151	-0.21407	0.410974	0.45177	-0.158668	0.0939826	0.121034	0.598745	0.276754	0.176869	0.56234	0.413278		0.206155	0.0860777
-0.264121	-0.21013	0.414721	0.456966	-0.153316	0.0948926	0.125127	0.604827	0.280054	0.182079	0.562981	0.413797		0.20899	0.0863549
-0.269232	-0.205993	0.41808	0.462277	-0.148142	0.0956705	0.129151	0.610944	0.283336	0.187251	0.563541	0.414129		0.211751	0.0866376
-0.274331	-0.201718	0.421266	0.467698	-0.143015	0.0962881	0.133356	0.617228	0.286312	0.192317	0.564174	0.414335		0.214492	0.0869289
-0.279309	-0.197372	0.424326	0.473172	-0.138025	0.0968296	0.1377	0.623653	0.288838	0.197376	0.564958	0.414196		0.217195	0.0872248
-0.283811	-0.193233	0.427365	0.478611	-0.13318	0.0974033	0.142049	0.630066	0.291104	0.202439	0.565829	0.413695		0.219861	0.0875137
-0.287951	-0.189254	0.430318	0.484014	-0.128362	0.0979878	0.146348	0.636302	0.293158	0.207457	0.566862	0.412981		0.222488	0.087793
-0.291836	-0.18537	0.433187	0.489501	-0.123485	0.0985958	0.150693	0.642388	0.295073	0.21227	0.567917	0.412216		0.225096	0.0880639
-0.295355	-0.181642	0.436197	0.495027	-0.118646	0.0991319	0.155002	0.648338	0.296838	0.217081	0.568992	0.411507		0.227706	0.0883325
-0.298454	-0.177704	0.439554	0.500524	-0.113801	0.0995244	0.159289	0.654396	0.29857	0.221823	0.570162	0.410958		0.230403	0.0885976
-0.301187	-0.173715	0.443076	0.506056	-0.109043	0.0997339	0.163814	0.660557	0.300309	0.226543	0.571314	0.41054		0.233166	0.0888631
-0.303608	-0.170204	0.446598	0.511574	-0.104418	0.0999722	0.168572	0.666633	0.301965	0.231365	0.572372	0.410263		0.235924	0.0891346
-0.305597	-0.167144	0.450367	0.516897	-0.099652	0.100393	0.173446	0.672796	0.303374	0.236201	0.573364	0.410132		0.238715	0.0894025
-0.307417	-0.164467	0.454332	0.521966	-0.0947668	0.100826	0.178348	0.679036	0.304468	0.24129	0.574451	0.40986		0.241494	0.0896768
-0.309081	-0.162187	0.45841	0.526894	-0.0899222	0.101231	0.183187	0.68536	0.305534	0.246582	0.57567	0.409182		0.244239	0.0899644
-0.310337	-0.160114	0.462577	0.531627	-0.085134	0.101525	0.187909	0.691739	0.306549	0.251952	0.577019	0.408354		0.246972	0.0902493
-0.311265	-0.15809	0.466753	0.536189	-0.0803728	0.101755	0.192636	0.698096	0.307327	0.257468	0.578409	0.40779		0.249725	0.0905261
-0.311931	-0.156104	0.471074	0.540672	-0.0758269	0.101859	0.197431	0.704545	0.307826	0.263229	0.579755	0.407303		0.252486	0.0908071
-0.312373	-0.154209	0.475496	0.545033	-0.0715253	0.101715	0.202135	0.711231	0.308102	0.26928	0.581172	0.406685		0.255229	0.0911034
-0.312614	-0.152547	0.479932	0.54931	-0.0672953	0.101607	0.206678	0.718215	0.308223	0.275502	0.582552	0.40607		0.257969	0.0914139
-0.312733	-0.15116	0.48434	0.553362	-0.063314	0.101547	0.210969	0.725241	0.30803	0.28183	0.583842	0.405407		0.260613	0.0917322
-0.312635	-0.149914	0.488774	0.557095	-0.0594276	0.101456	0.215007	0.73228	0.307634	0.288152	0.585291	0.404748		0.263205	0.0920512
-0.312238	-0.148704	0.49333	0.560599	-0.0554673	0.101246	0.218881	0.73944	0.307197	0.294552	0.586928	0.404215		0.265832	0.0923706
-0.311551	-0.14755	0.49791	0.563973	-0.0517164	0.100787	0.222587	0.746623	0.306675	0.300953	0.58859	0.403937		0.268435	0.0926944
-0.310444	-0.14645	0.502585	0.56726	-0.0481848	0.100154	0.226172	0.753808	0.306139	0.307008	0.59023	0.404183		0.271038	0.0930176
-0.308885	-0.145469	0.507382	0.57027	-0.044778	0.0994093	0.229727	0.760927	0.305562	0.312871	0.591754	0.405074		0.273654	0.0933292
-0.307041	-0.144831	0.51221	0.573013	-0.0414661	0.0986927	0.233352	0.767965	0.304939	0.318723	0.593094	0.406501		0.276263	0.0936369
-0.305059	-0.144463	0.517058	0.575557	-0.038114	0.0979026	0.236925	0.775039	0.304403	0.324394	0.594386	0.408218		0.278854	0.0939502
-0.302823	-0.144265	0.521826	0.577881	-0.034685	0.0970865	0.240353	0.782175	0.303976	0.329715	0.59566	0.410332		0.281436	0.0942587
-0.300396	-0.144321	0.526672	0.580018	-0.0312597	0.0964471	0.243859	0.789201	0.303576	0.334735	0.596855	0.412904		0.284024	0.0945624
-0.297801	-0.144551	0.531706	0.581899	-0.0276934	0.0957776	0.247486	0.796203	0.303214	0.339551	0.598034	0.41562		0.28662	0.0948615
-0.294895	-0.144928	0.536788	0.583629	-0.0238572	0.0950153	0.25121	0.803326	0.30301	0.344217	0.59924	0.418366		0.28926	0.0951526
-0.291684	-0.14546	0.54181	0.585404	-0.0200213	0.0941379	0.255046	0.810465	0.302904	0.348882	0.600465	0.421098		0.29192	0.0954415
-0.288126	-0.146125	0.546688	0.587267	-0.0163103	0.0931905	0.258793	0.817604	0.302758	0.353379	0.601761	0.423911		0.294566	0.0957288
-0.284247	-0.147085	0.551563	0.589149	-0.0126388	0.0922381	0.262425	0.824659	0.302522	0.357716	0.603033	0.426849		0.297182	0.0960141
-0.280157	-0.148394	0.556297	0.591009	-0.00900542	0.0911997	0.266141	0.831717	0.30211	0.362235	0.604195	0.429827		0.299765	0.0963042
-0.276113	-0.149942	0.560788	0.592952	-0.00540843	0.0901173	0.269913	0.838785	0.30162	0.366797	0.605359	0.432966		0.302319	0.0966103
-0.271998	-0.151616	0.56518	0.59508	-0.00197511	0.0888471	0.273608	0.845806	0.30111	0.371354	0.606621	0.436247		0.304855	0.0969339
-0.267726	-0.153389	0.569342	0.5974	0.00122412	0.0873901	0.2773	0.85298	0.300495	0.375947	0.607941	0.439606		0.307376	0.0972762
-0.263444	-0.155481	0.573517	0.599734	0.00437917	0.0858619	0.281138	0.860069	0.299848	0.380532	0.609203	0.443128		0.309874	0.0976338
-0.258899	-0.15791	0.577622	0.602115	0.00746532	0.0841508	0.28506	0.867022	0.299176	0.385176	0.610476	0.446834		0.312357	0.0979982
-0.254115	-0.16042	0.581335	0.604722	0.010245	0.0823077	0.289068	0.873978	0.298431	0.389685	0.611742	0.450811		0.314816	0.098369
-0.249025	-0.163072	0.584895	0.607406	0.0127924	0.0804933	0.293236	0.8808	0.297544	0.394183	0.613006	0.45512		0.317282	0.0987383
-0.243775	-0.165987	0.588321	0.610079	0.0151715	0.0787648	0.297497	0.887592	0.296463	0.39876	0.614243	0.459561		0.319724	0.0991159
-0.23868	-0.169158	0.591636	0.612733	0.0173916	0.0770731	0.301976	0.894425	0.295319	0.403296	0.615326	0.463993		0.322111	0.0995139
-0.233606	-0.172473	0.594818	0.615328	0.0195635	0.0754069	0.306646	0.901231	0.294195	0.407843	0.616452	0.468406		0.324484	0.0999203
-0.228482	-0.17559	0.597919	0.617858	0.0214919	0.0737346	0.311297	0.907888	0.293087	0.412338	0.617667	0.47273		0.326828	0.10032
-0.223039	-0.178361	0.601044	0.620281	0.0231064	0.0720078	0.315947	0.914384	0.291985	0.416862	0.618899	0.477061		0.329181	0.100699
-0.217514	-0.181019	0.604158	0.622632	0.0246206	0.0703238	0.320667	0.920685	0.290916	0.421294	0.620015	0.481437		0.331518	0.101065
-0.212068	-0.183825	0.607477	0.6249	0.0261566	0.0687134	0.325365	0.926725	0.289871	0.425629	0.621018	0.485694		0.333805	0.10143
-0.20645	-0.18675	0.610754	0.62713	0.0277268	0.0671722	0.329785	0.932903	0.288908	0.429931	0.622105	0.48987		0.336091	0.101801
-0.200796	-0.189681	0.613931	0.629349	0.0293049	0.0656715	0.334047	0.9392	0.28816	0.433986	0.623129	0.493888		0.338349	0.102173
-0.195101	-0.192651	0.617217	0.631453	0.0308736	0.0641835	0.338286	0.945355	0.287579	0.43809	0.624072	0.497621		0.340582	0.102538
-0.189605	-0.195694	0.620479	0.633489	0.0323053	0.062733	0.342365	0.951509	0.287153	0.442111	0.624877	0.50129		0.342751	0.102914
-0.184052	-0.198713	0.623885	0.635418	0.0336822	0.0612065	0.346427	0.957605	0.286952	0.445798	0.625587	0.505017		0.344901	0.103289
-0.178265	-0.201561	0.627269	0.637267	0.0350996	0.0596587	0.350551	0.963562	0.286971	0.44941	0.626407	0.508723		0.347091	0.103644
-0.172581	-0.204372	0.630508	0.639174	0.0365241	0.0581632	0.354699	0.969333	0.287198	0.452894	0.627203	0.512394		0.349261	0.103992
-0.166728	-0.207524	0.633816	0.641124	0.0380959	0.0565941	0.358811	0.974974	0.287649	0.456236	0.627949	0.516084		0.351423	0.104344
-0.160926	-0.211073	0.637064	0.643092	0.0398474	0.0549818	0.362852	0.980565	0.288269	0.45937	0.628694	0.519694		0.353536	0.104709
-0.154995	-0.214789	0.640245	0.644944	0.0417331	0.053319	0.366973	0.986076	0.288987	0.462393	0.629546	0.523249		0.35564	0.105072
-0.148767	-0.218479	0.643242	0.646727	0.0436688	0.051628	0.371153	0.991419	0.289834	0.465397	0.630475	0.526719		0.357751	0.105415
-0.142594	-0.222141	0.646032	0.648616	0.0456372	0.0499099	0.375415	0.99657	0.290783	0.468406	0.6313	0.529875		0.359818	0.105746
-0.136377	-0.225921	0.648725	0.650438	0.0477061	0.0480051	0.379621	1.00165	0.291728	0.47158	0.632114	0.532853		0.361843	0.106079
-0.130204	-0.229696	0.651179	0.652184	0.049806	0.045992	0.383611	1.00675	0.292617	0.474677	0.632896	0.535761		0.363798	0.106413
-0.123716	-0.233391	0.653485	0.654072	0.0519944	0.0439511	0.387662	1.01203	0.293558	0.477829	0.633584	0.538596		0.365804	0.106742
-0.117224	-0.237094	0.655605	0.656065	0.0542303	0.0419951	0.391541	1.01721	0.294545	0.481069	0.634168	0.541329		0.367787	0.107065
-0.110617	-0.240816	0.657695	0.658081	0.0565019	0.0401426	0.395323	1.02236	0.295632	0.484461	0.63463	0.544116		0.369792	0.107384
-0.103755	-0.244377	0.659831	0.659982	0.0588629	0.0382847	0.399128	1.02746	0.296839	0.488092	0.63506	0.547019		0.371869	0.107689
-0.0971483	-0.247701	0.661844	0.661757	0.0612609	0.0365487	0.402777	1.03225	0.298061	0.491739	0.635361	0.549933		0.37389	0.107972
-0.0901522	-0.250981	0.663923	0.663541	0.0636971	0.0348753	0.406555	1.03716	0.299441	0.495599	0.635548	0.552889		0.376008	0.10825
-0.0834406	-0.254089	0.665818	0.66528	0.0659397	0.0332446	0.410011	1.04193	0.300844	0.499253	0.635734	0.555512		0.378003	0.108519
-0.0762874	-0.257427	0.667815	0.667062	0.0682001	0.0314988	0.413633	1.04696	0.30246	0.503116	0.635843	0.558318		0.380099	0.10881
-0.0691704	-0.260514	0.669829	0.668638	0.070282	0.0298323	0.417161	1.0519	0.304074	0.50689	0.635845	0.561117		0.382157	0.109086
-0.0622571	-0.263251	0.671771	0.670196	0.0721278	0.0285071	0.420525	1.05656	0.305646	0.510514	0.63582	0.563832		0.384166	0.109337
-0.053792	-0.266558	0.674192	0.672078	0.0742609	0.0271872	0.42481	1.06179	0.307741	0.515004	0.635897	0.567229		0.386653	0.109625
-0.0485554	-0.268623	0.675711	0.673187	0.0755729	0.0263905	0.427522	1.06488	0.309097	0.517801	0.635988	0.569346		0.388193	0.1098

## Sheet: noise both 90 Y
fly1	fly2	fly3	fly4	fly5	fly6	fly7	fly8	fly9	fly10	fly11	fly12		Avg	SEM
7.30564e-07	3.78732e-06	4.48074e-08	-1.52599e-07	5.99806e-07	-3.9575e-07	-8.75253e-07	2.90463e-08	2.07726e-08	-2.8855e-08	2.28916e-07	0.000106189		9.18144e-06	8.82518e-06
-7.13111e-07	-2.14659e-06	3.71658e-07	1.67654e-07	-3.08567e-07	6.11166e-07	1.21713e-06	-5.81401e-07	-2.26412e-07	-1.21529e-07	-2.93656e-07	0.000196936		1.62427e-05	1.64284e-05
5.23458e-07	7.11897e-06	-6.63626e-07	-5.91176e-09	-1.19292e-07	-7.15401e-07	-1.35807e-06	2.81128e-07	4.42472e-07	2.93208e-07	4.81094e-07	0.000280538		2.39014e-05	2.33389e-05
1.02216e-07	-1.59667e-05	9.86623e-07	-4.54081e-07	5.30378e-07	6.70754e-07	3.61332e-07	-1.59009e-06	-5.55579e-07	-5.45945e-08	-5.81115e-07	0.000345196		2.73871e-05	2.89226e-05
-1.15209e-06	-0.000121892	-1.69192e-06	-2.58934e-07	-1.47481e-06	-3.186e-07	-1.67795e-06	-4.00564e-07	7.68236e-07	6.24323e-07	-4.16447e-07	0.000425123		2.47693e-05	3.77627e-05
7.44389e-07	-0.000248406	-3.45486e-07	-2.10704e-06	1.15467e-06	-4.67752e-07	-3.72135e-06	-5.53633e-06	-9.31923e-07	6.20574e-07	-1.3424e-06	0.00053199		2.26376e-05	5.0649e-05
-4.51085e-06	-0.000361563	-3.95588e-06	-1.55601e-06	-2.42195e-06	8.42307e-07	-3.33487e-06	1.03791e-05	-3.95702e-07	2.13634e-07	-3.46643e-06	0.000651747		2.34981e-05	6.44941e-05
-8.31588e-07	-0.000478039	-7.10648e-06	-6.50728e-06	1.7881e-07	-2.77334e-06	-9.78238e-06	6.70107e-05	-1.4429e-06	2.52335e-06	-3.96514e-06	0.000764613		2.69898e-05	7.82926e-05
-8.38297e-06	-0.000604458	-9.91087e-06	-3.67723e-06	-3.73035e-06	1.38902e-06	3.43637e-05	0.000113823	-4.39005e-06	-6.90976e-06	-1.24071e-05	0.00087471		3.08683e-05	9.26712e-05
-6.20387e-06	-0.000592554	2.69925e-06	5.30317e-05	2.11788e-05	-5.05871e-06	0.000136928	0.000206638	-2.85448e-06	-5.59138e-05	2.4218e-05	0.00101908		6.67659e-05	0.000103157
5.99513e-05	-0.000502276	0.000124598	0.000186411	8.65214e-05	-4.62243e-07	0.00038496	0.000454048	-1.39534e-05	-0.000122744	0.000163649	0.00119617		0.000168073	0.000116836
0.00024165	-0.000512865	0.000385406	0.000406427	0.000126805	3.1908e-05	0.000841491	0.000964135	3.95324e-05	-0.000177238	0.000413291	0.0016363		0.000366404	0.000164228
0.000583572	-0.000509446	0.00092251	0.000769694	0.000227626	9.25764e-05	0.00150617	0.00187841	0.000208308	-0.000248009	0.000825667	0.00232464		0.000715143	0.000245479
0.00106249	-0.000458031	0.00190686	0.00143	0.000391387	0.000202952	0.00247071	0.0032638	0.000473828	-0.000288738	0.00154537	0.0031427		0.00126194	0.000363416
0.00177266	-0.000277545	0.00338346	0.00256544	0.000690018	0.000376751	0.00366934	0.00518696	0.000915831	-0.000243604	0.00273252	0.00432152		0.00209111	0.000528022
0.00281582	0.0001523	0.00541606	0.00424389	0.00123644	0.000659131	0.00521654	0.00774585	0.00162343	-1.74709e-05	0.00448539	0.00591792		0.00329128	0.000739863
0.00449746	0.000745022	0.008024	0.00644735	0.00202361	0.00102361	0.00725008	0.0110403	0.00265535	0.000542243	0.00698711	0.00808189		0.00494317	0.00100977
0.00707425	0.00149149	0.0113117	0.00929768	0.00334194	0.00157359	0.00979017	0.0151763	0.0041034	0.00141499	0.0104227	0.0109586		0.00716307	0.00134371
0.0102693	0.00248846	0.0153889	0.0130124	0.00533052	0.00238204	0.0130255	0.0203046	0.00609549	0.00268224	0.0148385	0.0146026		0.010035	0.00174764
0.0141657	0.00379817	0.0204174	0.017651	0.00793668	0.00347879	0.0169013	0.0265459	0.00872664	0.00445612	0.0204378	0.0189641		0.0136233	0.00222788
0.019216	0.00535982	0.0265152	0.0232603	0.0112025	0.00503757	0.021374	0.0338726	0.0121358	0.00688149	0.0274117	0.0240619		0.0180274	0.00278295
0.0255519	0.00728383	0.0336118	0.0299383	0.0152491	0.00699248	0.0264656	0.0422723	0.0164762	0.0103029	0.0357183	0.0300913		0.0233295	0.0034029
0.0331465	0.00982126	0.0417835	0.0377193	0.0201673	0.00935097	0.0321489	0.0516518	0.0217565	0.0148101	0.04549	0.0369089		0.0295629	0.00407884
0.0420838	0.01296	0.0508846	0.0466289	0.0259124	0.0121953	0.0384462	0.0618988	0.0280832	0.0204625	0.0568365	0.044736		0.0367607	0.00481094
0.0524429	0.0167079	0.0607378	0.0566639	0.0325895	0.0154735	0.0452883	0.0730401	0.0356552	0.0274096	0.0696991	0.0535078		0.0449346	0.00559413
0.0641974	0.0210588	0.0714198	0.0677526	0.040037	0.0191681	0.0526821	0.0850426	0.0444604	0.0356763	0.0841152	0.063023		0.0540528	0.00643756
0.0771869	0.0258896	0.0829199	0.0798883	0.0481236	0.0233173	0.0605433	0.0978091	0.0545103	0.0452909	0.100068	0.0736331		0.0640984	0.00735079
0.0910507	0.0312055	0.0952487	0.0931832	0.0568491	0.0279284	0.0687186	0.111188	0.0658894	0.0563515	0.117429	0.0851687		0.0750176	0.00832341
0.10573	0.0370579	0.108324	0.107598	0.0659086	0.0328314	0.0770108	0.125119	0.0785687	0.0690014	0.136004	0.0974648		0.0867182	0.00935856
0.121291	0.0435091	0.122089	0.123081	0.0752933	0.038065	0.0853262	0.139657	0.0925968	0.0832104	0.155879	0.110293		0.0991908	0.0104652
0.137736	0.0504325	0.136381	0.139638	0.0851441	0.0435742	0.0938194	0.154824	0.107947	0.0990315	0.1772	0.123527		0.112438	0.0116597
0.154981	0.0577218	0.151125	0.157092	0.0954803	0.0492246	0.102495	0.17068	0.124491	0.116481	0.199816	0.137213		0.1264	0.0129509
0.172653	0.0655481	0.166523	0.175404	0.106235	0.0552426	0.111326	0.187247	0.142302	0.13521	0.223781	0.151285		0.141063	0.01433
0.190723	0.073778	0.182453	0.194666	0.117378	0.0615878	0.120325	0.204494	0.161406	0.155216	0.248927	0.165924		0.156406	0.0158
0.209168	0.0821874	0.198956	0.214713	0.128909	0.0681591	0.129499	0.222352	0.181612	0.176572	0.274953	0.180827		0.172326	0.0173575
0.227792	0.0908375	0.215999	0.23547	0.140773	0.075033	0.138946	0.240968	0.202625	0.198996	0.302065	0.196137		0.188803	0.0190034
0.246634	0.0998934	0.233376	0.257262	0.153188	0.0821705	0.148706	0.260674	0.224192	0.222642	0.330391	0.211835		0.205914	0.0207431
0.265978	0.109529	0.251316	0.28033	0.16623	0.0895612	0.158767	0.281603	0.246377	0.247579	0.359845	0.227238		0.223696	0.0225781
0.285613	0.119797	0.269908	0.304612	0.1799	0.0973028	0.169286	0.303903	0.269528	0.273344	0.390446	0.242625		0.242189	0.0244987
0.305143	0.130864	0.289176	0.329882	0.194335	0.105462	0.180453	0.327563	0.293786	0.299703	0.422353	0.25828		0.261417	0.0264847
0.325216	0.142632	0.309143	0.355862	0.209505	0.113917	0.192194	0.352404	0.31909	0.326848	0.455595	0.274355		0.281397	0.0285494
0.345936	0.155119	0.32986	0.382512	0.225294	0.122636	0.204496	0.378516	0.345376	0.354918	0.489952	0.290889		0.302125	0.0306879
0.366961	0.168753	0.351368	0.409979	0.241596	0.131622	0.217452	0.405588	0.372525	0.383734	0.52503	0.307731		0.323528	0.0328559
0.388567	0.183335	0.373334	0.438411	0.258502	0.140711	0.230984	0.433373	0.400434	0.41343	0.560521	0.325211		0.345568	0.0350519
0.410722	0.198898	0.395821	0.467869	0.276154	0.149905	0.245022	0.462318	0.428928	0.443791	0.596723	0.343398		0.368296	0.0372912
0.43341	0.215994	0.418997	0.498236	0.294629	0.159193	0.259543	0.492455	0.458073	0.474599	0.633859	0.362234		0.391769	0.0395614
0.456487	0.234471	0.44297	0.529279	0.313953	0.168562	0.274581	0.523479	0.488232	0.506449	0.671426	0.381549		0.415953	0.0418483
0.479654	0.253525	0.46794	0.561162	0.334021	0.178107	0.290198	0.5553	0.519682	0.539216	0.708774	0.401122		0.440725	0.0441501
0.502813	0.27323	0.4936	0.594219	0.354807	0.187775	0.306371	0.588051	0.552167	0.572714	0.746035	0.421069		0.466071	0.0464757
0.5261	0.294377	0.51981	0.628438	0.37631	0.197584	0.323096	0.621688	0.585143	0.607166	0.783534	0.441271		0.492043	0.0488134
0.549736	0.316703	0.546541	0.663923	0.398472	0.207585	0.340533	0.65574	0.618572	0.642876	0.821049	0.461751		0.518623	0.0511574
0.573362	0.339709	0.573881	0.70078	0.421317	0.217853	0.358665	0.690195	0.652387	0.679965	0.858619	0.482911		0.545804	0.0535219
0.596527	0.363302	0.601856	0.739091	0.444945	0.228482	0.377142	0.72528	0.686585	0.718191	0.896386	0.504746		0.573544	0.0559221
0.619574	0.387684	0.630216	0.778939	0.46945	0.239467	0.396054	0.761442	0.721291	0.757796	0.934675	0.526893		0.601957	0.0583871
0.642923	0.413217	0.659389	0.820251	0.494805	0.250883	0.415828	0.798804	0.756475	0.797966	0.97381	0.549288		0.631137	0.0608964
0.666008	0.439662	0.689468	0.862964	0.520759	0.262847	0.4365	0.836735	0.792232	0.838408	1.01352	0.571984		0.660924	0.0634239
0.688963	0.466799	0.720334	0.907099	0.547097	0.275416	0.458058	0.875582	0.82828	0.879919	1.0535	0.595164		0.691351	0.0659837
0.712666	0.494973	0.752086	0.952803	0.573856	0.288537	0.480526	0.915637	0.864563	0.922092	1.09389	0.619286		0.722576	0.0685704
0.737191	0.524754	0.784541	0.999668	0.601143	0.302109	0.503876	0.956375	0.901061	0.964898	1.13496	0.644332		0.754575	0.0711628
0.762612	0.555979	0.817858	1.04711	0.629001	0.316072	0.528101	0.997733	0.937613	1.00849	1.17623	0.669779		0.787216	0.0737387
0.788632	0.587831	0.852054	1.0951	0.657592	0.330469	0.552973	1.03954	0.974454	1.05309	1.2177	0.695285		0.820393	0.0763272
0.8149	0.619999	0.887005	1.14337	0.687026	0.345257	0.578442	1.0816	1.01148	1.09857	1.25981	0.720821		0.854023	0.0789405
0.841645	0.652563	0.922687	1.19184	0.717176	0.360313	0.604702	1.12404	1.04874	1.14436	1.30205	0.746218		0.888027	0.0815476
0.869274	0.685485	0.959387	1.24094	0.748053	0.375621	0.631739	1.16688	1.08588	1.19067	1.34417	0.771576		0.922473	0.0841506
0.897438	0.718616	0.997395	1.29063	0.779658	0.391043	0.659296	1.21004	1.12246	1.23734	1.38598	0.797183		0.957256	0.0867449
0.925637	0.751269	1.03629	1.34031	0.81179	0.406501	0.687278	1.25376	1.15876	1.28487	1.42712	0.822478		0.992172	0.0893556
0.954718	0.783229	1.07587	1.38979	0.844429	0.421966	0.715918	1.29836	1.19478	1.33377	1.46785	0.847353		1.02734	0.0920039
0.984382	0.815128	1.11587	1.43953	0.877789	0.437399	0.745145	1.34361	1.23069	1.38353	1.50859	0.872094		1.06281	0.0946887
1.01376	0.847134	1.15596	1.48983	0.911792	0.452844	0.774812	1.38911	1.26649	1.43417	1.54956	0.896371		1.09849	0.0974282
1.04307	0.879833	1.19659	1.54059	0.945803	0.468391	0.804892	1.43472	1.30219	1.48564	1.59105	0.920662		1.13445	0.100214
1.07275	0.913374	1.23794	1.59146	0.979511	0.484108	0.835464	1.48033	1.338	1.5378	1.63353	0.945393		1.17081	0.103034
1.10338	0.947503	1.27956	1.64245	1.01304	0.499802	0.866726	1.52648	1.37352	1.59026	1.67663	0.970361		1.20748	0.105878
1.13477	0.982949	1.32174	1.69424	1.04639	0.515566	0.898276	1.5737	1.40867	1.64288	1.72003	0.995889		1.24459	0.10875
1.16679	1.02005	1.36472	1.74655	1.07963	0.531559	0.930032	1.62145	1.44343	1.69611	1.76365	1.02247		1.2822	0.111622
1.19937	1.05857	1.40796	1.79867	1.11281	0.547707	0.962565	1.66972	1.47836	1.74941	1.8073	1.05011		1.32021	0.114447
1.23258	1.09819	1.45157	1.85098	1.14607	0.564205	0.995961	1.71859	1.51404	1.80226	1.85157	1.07812		1.35868	0.117254
1.26623	1.13945	1.4956	1.90387	1.1798	0.58109	1.02994	1.76758	1.54993	1.85478	1.89689	1.10658		1.39765	0.120044
1.29979	1.18204	1.54006	1.95741	1.21415	0.598297	1.0644	1.81682	1.58596	1.90719	1.94301	1.13577		1.43707	0.12283
1.33376	1.22438	1.5854	2.01136	1.24848	0.615961	1.0994	1.86594	1.62182	1.95964	1.98966	1.16493		1.47673	0.125626
1.36808	1.26697	1.63141	2.06516	1.28275	0.63412	1.13486	1.91464	1.65694	2.01221	2.0365	1.19407		1.51647	0.128385
1.40267	1.30993	1.67785	2.11875	1.31791	0.652684	1.17092	1.9634	1.69132	2.06496	2.08334	1.22324		1.55641	0.131099
1.43708	1.35252	1.7246	2.17257	1.35399	0.671692	1.20776	2.01235	1.7254	2.11798	2.12999	1.25226		1.59652	0.133797
1.47089	1.39531	1.77153	2.22655	1.39057	0.691281	1.24523	2.06147	1.75959	2.17132	2.17593	1.28132		1.63675	0.136457
1.505	1.43847	1.81817	2.2802	1.42743	0.711369	1.28359	2.11071	1.79376	2.22481	2.22101	1.31047		1.67708	0.139042
1.53941	1.48185	1.86389	2.33394	1.46449	0.731904	1.32279	2.16007	1.82787	2.27801	2.26604	1.33968		1.7175	0.141576
1.57398	1.52537	1.90917	2.38759	1.50184	0.752932	1.36229	2.20923	1.86181	2.33071	2.31128	1.36907		1.75794	0.144058
1.60899	1.56888	1.9545	2.44017	1.53922	0.774379	1.40217	2.2583	1.89543	2.3837	2.35634	1.39905		1.79843	0.14647
1.64465	1.61278	1.99995	2.49202	1.57639	0.796291	1.44249	2.30768	1.92901	2.43722	2.40139	1.42885		1.83906	0.148856
1.68095	1.65764	2.04526	2.54361	1.61364	0.818736	1.48302	2.35703	1.96278	2.49097	2.44648	1.458		1.87984	0.151214
1.71768	1.70302	2.08985	2.59498	1.65148	0.841562	1.52376	2.40661	1.99697	2.54517	2.49151	1.48723		1.92082	0.153545
1.75454	1.74837	2.13399	2.64585	1.68981	0.864698	1.56456	2.45686	2.03185	2.59946	2.53681	1.51664		1.96195	0.155868
1.79081	1.79399	2.17772	2.69617	1.72831	0.888264	1.6048	2.50774	2.06734	2.65341	2.58241	1.54647		2.00312	0.158173
1.82704	1.84023	2.22148	2.74622	1.7674	0.912163	1.64402	2.55905	2.10284	2.7069	2.62824	1.57701		2.04438	0.160453
1.86396	1.88702	2.26579	2.79604	1.80699	0.93628	1.68239	2.61043	2.13803	2.76014	2.6745	1.60835		2.08583	0.16271
1.90129	1.93287	2.31047	2.84576	1.84662	0.960607	1.72042	2.66172	2.17327	2.81356	2.72114	1.63973		2.12729	0.164988
1.93878	1.97696	2.35624	2.89543	1.88633	0.985079	1.75844	2.71309	2.20873	2.86725	2.768	1.67045		2.16873	0.167316
1.97617	2.02079	2.40241	2.94539	1.92631	1.00981	1.79655	2.76481	2.2442	2.92131	2.81531	1.70116		2.21035	0.16968
2.01345	2.06517	2.44759	2.99555	1.96681	1.03482	1.8349	2.81672	2.27967	2.9752	2.86312	1.73216		2.2521	0.172023
2.05075	2.11003	2.4924	3.04543	2.00789	1.05995	1.8734	2.8684	2.31499	3.02912	2.91084	1.76385		2.29392	0.174316
2.08798	2.15513	2.53709	3.09517	2.04908	1.08516	1.91191	2.91963	2.34958	3.08357	2.9584	1.79606		2.33573	0.176592
2.12518	2.20094	2.58174	3.14478	2.09022	1.11059	1.95065	2.97059	2.3835	3.13788	3.00614	1.82851		2.37756	0.178835
2.1631	2.24751	2.62671	3.19456	2.1316	1.1365	1.9901	3.02168	2.41717	3.19246	3.05374	1.86152		2.41972	0.181033
2.20208	2.29416	2.67122	3.24471	2.17332	1.16273	2.03063	3.07301	2.4506	3.24768	3.10118	1.8947		2.46217	0.183212
2.24106	2.34114	2.71471	3.29487	2.21474	1.18923	2.07253	3.12435	2.48389	3.30335	3.14842	1.9277		2.50467	0.185366
2.27967	2.38821	2.75769	3.34481	2.25561	1.21607	2.1158	3.17574	2.51695	3.35966	3.19556	1.95981		2.54713	0.187525
2.31802	2.43658	2.80072	3.39481	2.29673	1.24323	2.15968	3.2275	2.5495	3.41609	3.24309	1.99108		2.58975	0.189703
2.35647	2.48679	2.84361	3.4449	2.33832	1.27081	2.20391	3.27944	2.58155	3.47255	3.29077	2.0222		2.63261	0.191862
2.39541	2.53606	2.88656	3.49502	2.38002	1.29865	2.2487	3.33127	2.61332	3.52975	3.33802	2.05313		2.67549	0.194023
2.43372	2.58416	2.93022	3.54583	2.42164	1.32686	2.29365	3.38278	2.64469	3.58784	3.38438	2.08411		2.71832	0.196215
2.47112	2.63202	2.97408	3.59723	2.46303	1.35532	2.33902	3.43398	2.67585	3.64616	3.42982	2.11534		2.76108	0.198403
2.50855	2.68013	3.01813	3.64857	2.50456	1.38383	2.38516	3.48513	2.70749	3.70448	3.47463	2.14761		2.80402	0.200539
2.54614	2.72922	3.06254	3.69987	2.54643	1.41247	2.43166	3.53614	2.7396	3.76302	3.51878	2.18107		2.84725	0.20262
2.58339	2.77858	3.10671	3.75106	2.58821	1.44113	2.47804	3.58713	2.77167	3.82108	3.56255	2.21467		2.89035	0.204682
2.6205	2.82801	3.15082	3.80164	2.62948	1.46986	2.52404	3.63797	2.80317	3.87878	3.60643	2.24817		2.93324	0.206736
2.65834	2.87757	3.19482	3.85178	2.6705	1.49887	2.56997	3.6884	2.83418	3.93639	3.65041	2.28161		2.97607	0.208758
2.69636	2.9275	3.23834	3.90196	2.71191	1.52808	2.61594	3.73848	2.86515	3.99298	3.69411	2.31534		3.01885	0.210711
2.73417	2.97785	3.28128	3.95193	2.75374	1.55741	2.66204	3.78858	2.8962	4.0493	3.73731	2.34942		3.0616	0.21262
2.77216	3.02902	3.32363	4.00182	2.79555	1.58687	2.70825	3.83889	2.92727	4.10616	3.78033	2.38326		3.10443	0.214547
2.81014	3.08247	3.3658	4.05148	2.83713	1.61642	2.75402	3.889	2.95824	4.1628	3.82368	2.41667		3.14732	0.216481
2.84879	3.13683	3.40773	4.10053	2.87888	1.64597	2.7994	3.93937	2.98912	4.21917	3.86782	2.44983		3.19029	0.218422
2.88851	3.19011	3.44909	4.14935	2.92078	1.67571	2.84416	3.99047	3.01961	4.27479	3.91285	2.48227		3.23314	0.220384
2.92811	3.24248	3.48977	4.19811	2.96224	1.7059	2.88834	4.04215	3.04926	4.32927	3.95859	2.51325		3.27562	0.222376
2.96755	3.29408	3.53005	4.24676	3.00311	1.73623	2.93232	4.09369	3.078	4.38334	4.00507	2.54338		3.3178	0.224405
3.00725	3.34535	3.57004	4.29527	3.04379	1.76663	2.97612	4.14398	3.10629	4.43662	4.05207	2.57289		3.35969	0.226406
3.04615	3.3963	3.60924	4.34399	3.08485	1.7971	3.02013	4.19353	3.13449	4.48861	4.09891	2.60137		3.40122	0.228377
3.0842	3.44669	3.64814	4.39255	3.12653	1.82733	3.06399	4.24327	3.16247	4.54034	4.14562	2.62967		3.44257	0.230367
3.1227	3.49664	3.68701	4.44045	3.1686	1.85731	3.10731	4.29319	3.19013	4.59239	4.19283	2.65837		3.48391	0.232379
3.16174	3.54531	3.72555	4.48809	3.21068	1.88705	3.15012	4.343	3.21738	4.64406	4.24061	2.68736		3.52508	0.234393
3.20054	3.59233	3.76374	4.53453	3.25285	1.91663	3.19261	4.39234	3.24446	4.69499	4.28803	2.71658		3.5658	0.236338
3.23935	3.6381	3.80127	4.57972	3.29528	1.94604	3.2355	4.4412	3.27141	4.74576	4.33475	2.74551		3.60616	0.238224
3.2785	3.68253	3.83816	4.62449	3.33771	1.97535	3.27881	4.4898	3.29824	4.79694	4.38122	2.77397		3.64631	0.240112
3.31694	3.7263	3.87466	4.66844	3.3802	2.00475	3.32245	4.53807	3.32533	4.8491	4.42742	2.80254		3.68635	0.241993
3.35506	3.77013	3.9107	4.71167	3.42316	2.03402	3.36619	4.586	3.35299	4.90189	4.47319	2.83135		3.72636	0.243854
3.39373	3.81371	3.94614	4.75433	3.46674	2.0631	3.40985	4.63442	3.38113	4.95469	4.51851	2.85973		3.76634	0.245709
3.43287	3.85688	3.98142	4.79637	3.5108	2.09205	3.4538	4.68364	3.40955	5.0086	4.56349	2.88767		3.80643	0.24761
3.47299	3.90006	4.01725	4.83774	3.55504	2.1208	3.49787	4.73294	3.43848	5.06387	4.60852	2.91623		3.84682	0.249529
3.51338	3.94304	4.05304	4.87861	3.59946	2.14938	3.54204	4.78208	3.46794	5.11935	4.65355	2.9453		3.88727	0.251427
3.55359	3.98465	4.08854	4.91897	3.64394	2.17794	3.5864	4.83103	3.49774	5.17489	4.69828	2.97413		3.92751	0.253308
3.59402	4.02551	4.12391	4.95841	3.68858	2.20659	3.63078	4.8796	3.52774	5.23081	4.74278	3.00296		3.96764	0.255157
3.63475	4.06687	4.15881	4.99764	3.73332	2.23526	3.67486	4.92834	3.55758	5.28702	4.78741	3.03159		4.00779	0.257031
3.67571	4.10849	4.19326	5.03684	3.77722	2.26407	3.71837	4.97756	3.58752	5.34305	4.83223	3.05982		4.04785	0.258936
3.71665	4.15087	4.22737	5.07543	3.82034	2.29297	3.76156	5.02672	3.61753	5.39828	4.87712	3.08788		4.08773	0.260811
3.75853	4.19397	4.26129	5.11343	3.86343	2.3219	3.8045	5.07589	3.64725	5.45257	4.92195	3.11563		4.12753	0.262645
3.80102	4.23637	4.29519	5.15039	3.90668	2.35097	3.84735	5.12514	3.67655	5.50625	4.96665	3.14284		4.16712	0.264441
3.8431	4.27763	4.32889	5.1863	3.9498	2.38035	3.89018	5.17428	3.70517	5.55933	5.01139	3.16927		4.20631	0.266212
3.88532	4.31802	4.36223	5.22164	3.99247	2.41006	3.93286	5.22329	3.73338	5.61149	5.05588	3.19532		4.24516	0.267932
3.92761	4.35772	4.39497	5.25623	4.03485	2.4398	3.9755	5.27166	3.76161	5.66282	5.09995	3.22091		4.28364	0.269593
3.97018	4.39681	4.42731	5.29016	4.07674	2.46954	4.01805	5.31897	3.78994	5.71351	5.14415	3.2453		4.32172	0.271227
4.01285	4.43542	4.45958	5.32351	4.1183	2.49934	4.06062	5.36505	3.81838	5.76338	5.18857	3.26846		4.35946	0.272829
4.0548	4.47366	4.49159	5.3562	4.15964	2.52915	4.1034	5.4102	3.84695	5.81242	5.23281	3.29055		4.39678	0.274397
4.09624	4.51109	4.52353	5.38844	4.2009	2.55902	4.1465	5.45472	3.87561	5.86074	5.27691	3.31238		4.43384	0.275919
4.13726	4.54764	4.55557	5.42004	4.24317	2.58888	4.18992	5.49848	3.90441	5.90853	5.32086	3.33394		4.47072	0.27739
4.17794	4.58356	4.58753	5.45091	4.28615	2.61855	4.23331	5.54174	3.93343	5.95628	5.36438	3.35461		4.50737	0.278861
4.21788	4.61888	4.6192	5.48155	4.3291	2.64796	4.27682	5.58464	3.96273	6.00436	5.40767	3.37472		4.54379	0.280364
4.25724	4.65437	4.65046	5.51227	4.37201	2.6771	4.32023	5.62728	3.99254	6.05252	5.45103	3.39386		4.58007	0.281923
4.29708	4.69037	4.68132	5.54284	4.41476	2.70588	4.36319	5.66961	4.02317	6.10092	5.49434	3.41216		4.6163	0.283522
4.33717	4.72611	4.71164	5.57299	4.45741	2.73437	4.40613	5.71156	4.05446	6.14969	5.53786	3.42983		4.65243	0.285153
4.3774	4.76089	4.74167	5.60296	4.49984	2.76304	4.4488	5.75367	4.08591	6.1984	5.58169	3.44674		4.68842	0.286816
4.41737	4.79513	4.77158	5.6328	4.54231	2.79217	4.49097	5.79624	4.11746	6.2472	5.62515	3.46377		4.72435	0.288472
4.45658	4.82968	4.80136	5.66239	4.58491	2.82175	4.53265	5.83964	4.14925	6.29626	5.66809	3.48111		4.76031	0.290128
4.49579	4.86401	4.83139	5.69159	4.62757	2.85169	4.57347	5.88366	4.1813	6.34546	5.71077	3.49842		4.79626	0.291788
4.53472	4.89758	4.86151	5.72031	4.67047	2.88181	4.61381	5.92776	4.21373	6.39475	5.7535	3.51536		4.83211	0.293457
4.57288	4.93098	4.89167	5.74894	4.71307	2.91201	4.65379	5.97194	4.24616	6.44417	5.79636	3.532		4.86783	0.295162
4.61067	4.96406	4.92203	5.77771	4.75507	2.9422	4.69338	6.01579	4.27845	6.49326	5.83928	3.54861		4.90338	0.296871
4.64876	4.99638	4.9526	5.80609	4.79689	2.97241	4.73262	6.05893	4.31089	6.54141	5.88264	3.56493		4.93871	0.298542
4.68752	5.02775	4.98352	5.8339	4.83867	3.00257	4.77135	6.10113	4.34337	6.58887	5.92605	3.58163		4.97386	0.300144
4.72631	5.05797	5.01483	5.86157	4.88047	3.03254	4.80997	6.14281	4.37572	6.6357	5.96917	3.59907		5.00884	0.301691
4.76495	5.08733	5.04648	5.88924	4.92236	3.06227	4.84832	6.18477	4.40786	6.68181	6.01194	3.61689		5.04369	0.303222
4.80393	5.11625	5.07843	5.91689	4.96437	3.09181	4.8866	6.22668	4.43993	6.72722	6.05442	3.63483		5.07845	0.304728
4.8439	5.14484	5.11063	5.94455	5.00641	3.12118	4.92543	6.26826	4.47207	6.77146	6.09734	3.65271		5.11323	0.306199
4.88522	5.17317	5.14311	5.97227	5.04824	3.15044	4.96444	6.30941	4.50427	6.81469	6.14037	3.67035		5.148	0.307635
4.92731	5.20139	5.17581	6.00035	5.08952	3.17959	5.00353	6.34997	4.53665	6.85723	6.18351	3.68734		5.18268	0.309069
4.97002	5.22959	5.20874	6.02891	5.13022	3.20847	5.04223	6.39052	4.5691	6.89905	6.22694	3.70419		5.21733	0.310517
5.01268	5.25757	5.24192	6.05776	5.1708	3.23733	5.08042	6.4313	4.60171	6.94022	6.27016	3.72108		5.25191	0.311955
5.05501	5.28558	5.27513	6.08683	5.21153	3.26667	5.11852	6.47245	4.63445	6.98082	6.31329	3.73774		5.2865	0.313377
5.09726	5.31397	5.30859	6.11634	5.25202	3.29648	5.15673	6.51444	4.66716	7.0212	6.35621	3.75419		5.32122	0.314815
5.13859	5.34272	5.34245	6.14633	5.29212	3.32674	5.19551	6.55716	4.70011	7.06129	6.39942	3.76999		5.35604	0.316289
5.17919	5.37211	5.37672	6.17664	5.33237	3.35753	5.2347	6.60021	4.73337	7.10096	6.44321	3.78541		5.39103	0.317772
5.21915	5.40194	5.41178	6.20711	5.37293	3.38884	5.27418	6.64342	4.76685	7.14031	6.48711	3.8006		5.42619	0.319243
5.25817	5.43217	5.44761	6.23742	5.41361	3.42068	5.31374	6.68675	4.80049	7.17951	6.53109	3.81558		5.4614	0.320704
5.29692	5.46251	5.48401	6.26757	5.45438	3.45287	5.35301	6.73029	4.83421	7.21889	6.5752	3.83074		5.49672	0.322165
5.33578	5.4924	5.52026	6.29781	5.49539	3.48517	5.39232	6.77418	4.86789	7.2583	6.61985	3.84653		5.53216	0.323632
5.37486	5.52251	5.55591	6.32808	5.53666	3.51753	5.43199	6.81848	4.90146	7.29765	6.66497	3.86323		5.56778	0.325092
5.41417	5.55229	5.59164	6.35828	5.57791	3.55015	5.47238	6.86297	4.93501	7.33698	6.71005	3.88015		5.6035	0.326539
5.45451	5.58106	5.62769	6.38845	5.61941	3.58287	5.51357	6.90752	4.96869	7.37628	6.75527	3.89707		5.63936	0.327987
5.49624	5.60967	5.66404	6.41844	5.66091	3.61527	5.55507	6.95209	5.00248	7.41556	6.80092	3.91392		5.67538	0.329463
5.5389	5.63811	5.70029	6.44808	5.70175	3.64716	5.59669	6.99634	5.03609	7.45464	6.84656	3.93073		5.71128	0.33095
5.5824	5.66631	5.736	6.47749	5.74251	3.67884	5.63837	7.04047	5.06959	7.49363	6.89138	3.94812		5.74709	0.332401
5.62604	5.69449	5.77135	6.50687	5.78341	3.71047	5.67991	7.08435	5.1033	7.53226	6.93541	3.96589		5.78281	0.333802
5.67001	5.72295	5.80638	6.5365	5.82413	3.74165	5.72105	7.12794	5.13722	7.57059	6.97947	3.98426		5.81851	0.335191
5.71451	5.7516	5.84105	6.56645	5.86469	3.77202	5.76175	7.1721	5.17118	7.60895	7.02364	4.00323		5.85426	0.336626
5.75896	5.78052	5.87538	6.59639	5.90488	3.80171	5.80227	7.21654	5.2051	7.64739	7.06757	4.02206		5.8899	0.338113
5.80346	5.81022	5.91004	6.62609	5.94445	3.83152	5.84298	7.26106	5.23928	7.68619	7.1115	4.04092		5.92564	0.339608
5.84779	5.83999	5.94521	6.65553	5.98334	3.86145	5.88378	7.30538	5.27337	7.72468	7.15515	4.05994		5.9613	0.34107
5.89255	5.87041	5.98047	6.68517	6.02166	3.89131	5.92452	7.34939	5.30717	7.76311	7.19865	4.07916		5.99696	0.342525
5.93755	5.9018	6.0156	6.71523	6.059	3.92143	5.96504	7.3935	5.34093	7.8015	7.24211	4.09854		6.03269	0.34397
5.98207	5.93319	6.05048	6.74573	6.09592	3.95174	6.00529	7.43697	5.37466	7.83955	7.28495	4.11834		6.06824	0.345357
6.02674	5.96509	6.08598	6.77708	6.13362	3.98251	6.04556	7.48032	5.40893	7.8781	7.32794	4.13923		6.10426	0.346703
6.07129	5.99739	6.12213	6.8087	6.17134	4.0135	6.08536	7.52365	5.44318	7.91647	7.37137	4.1609		6.14044	0.348019
6.11638	6.02995	6.15902	6.84067	6.20917	4.04472	6.12538	7.56725	5.47744	7.95513	7.4156	4.18325		6.177	0.349345
6.1616	6.06238	6.19641	6.87275	6.24715	4.07641	6.16584	7.61091	5.51154	7.99389	7.45956	4.20569		6.21368	0.350652
6.20623	6.09457	6.23428	6.90481	6.28531	4.1088	6.20663	7.65424	5.54533	8.03212	7.50293	4.22832		6.2503	0.351882
6.25073	6.12687	6.27316	6.93749	6.32418	4.14192	6.248	7.69816	5.57936	8.07044	7.5468	4.25179		6.28741	0.353087
6.29417	6.15867	6.31186	6.97026	6.36291	4.17402	6.28883	7.74181	5.6125	8.10794	7.58988	4.2752		6.324	0.354304
6.33781	6.19119	6.35127	7.00435	6.40288	4.206	6.33006	7.78685	5.64621	8.1462	7.63358	4.29914		6.36129	0.355602
6.38028	6.22336	6.39013	7.03837	6.44323	4.23745	6.37059	7.83182	5.67988	8.18395	7.67692	4.32306		6.39825	0.356901
6.42259	6.2556	6.42948	7.07245	6.48458	4.26873	6.41116	7.87666	5.7137	8.22193	7.72079	4.34803		6.43548	0.358183
6.46509	6.28819	6.4698	7.10682	6.527	4.30039	6.45159	7.9224	5.74793	8.26079	7.76541	4.37416		6.4733	0.359479
6.50595	6.31991	6.50918	7.14048	6.56861	4.33139	6.49047	7.96745	5.7812	8.29845	7.80877	4.39961		6.51012	0.360746
6.54833	6.35305	6.55043	7.17609	6.61153	4.36393	6.53087	8.01475	5.81601	8.33789	7.85419	4.42614		6.5486	0.362088
6.58788	6.38433	6.58946	7.20964	6.65155	4.39471	6.5686	8.05988	5.84873	8.3753	7.89704	4.45139		6.58487	0.363368
6.62955	6.41747	6.6307	7.24503	6.69349	4.42723	6.60778	8.1077	5.88324	8.41493	7.94257	4.47835		6.62317	0.364726
6.67071	6.44991	6.67086	7.27982	6.73404	4.45867	6.64564	8.15441	5.91702	8.45394	7.98733	4.50467		6.66058	0.366089
6.70987	6.48078	6.70876	7.31334	6.77235	4.48836	6.68112	8.19885	5.94915	8.49132	8.02969	4.52971		6.69611	0.367408
6.75703	6.51819	6.75481	7.35432	6.81893	4.52533	6.72357	8.25239	5.9886	8.53683	8.08098	4.56033		6.73928	0.368947
6.78615	6.5413	6.7834	7.37966	6.84779	4.54858	6.74971	8.28539	6.01315	8.56502	8.11273	4.57934		6.76602	0.369875
