# Supplementary material for: How spatial release from masking may fail to function in a highly directional auditory system
Source: eLife. 2017 Apr 25;6:e20731. doi: 10.7554/eLife.20731 (PMC5443663; doi:10.7554/eLife.20731)
Supplement: Figure 6—source data 4. — Effective amplitude measurements (i.e. within-trace signal-to-noise ratio) from smoothed tympanal responses for 23 iterations of signal within the masker. Signal amplitudes were measured from 30 ms time segments corresponding with signal pulses; masker amplitudes were measured from 30 ms segments in the middle of the interpulse interval (i.e. 200 ms after signal-pulse onset). Data plotted in Figure 6D. DOI: http://dx.doi.org/10.7554/eLife.20731.028 [file elife-20731-fig6-data4.xlsx]

## Sheet: fig6source
Effective amplitude
ispi grouped	contra grouped	ipsi sepearated	contra separated
3.15725	6.88572	3.63422	9.59173
4.64441	5.82921	2.93002	9.85485
3.03208	5.4878	4.6124	10.4736
4.19941	6.17567	4.72119	9.16079
-0.298495	5.8716	5.42969	9.94
4.7823	6.09022	3.72965	9.10195
5.91833	5.67544	5.37311	9.24903
4.82646	5.56331	5.43868	10.0355
3.60533	4.99005	4.33794	9.99776
3.39738	5.00642	6.37258	9.82341
5.66318	5.72222	4.57978	10.7785
4.74687	5.72952	5.51264	10.2033
-2.82941	5.27489	4.66379	10.9216
2.30505	5.66205	5.12671	10.2648
2.49238	5.97011	4.97121	10.1029
1.90262	6.43565	5.23356	10.0183
1.59487	5.80764	3.97865	10.1604
3.51179	5.70663	3.44417	10.0103
3.2816	5.3534	5.03616	10.3554
2.11823	5.33903	4.49675	10.1953
2.13471	6.27724	5.13886	9.51196
4.17454	4.79447	2.90136	9.8362
1.86749	6.31668	4.0576	9.96339
