# Supplementary material for: How spatial release from masking may fail to function in a highly directional auditory system
Source: eLife. 2017 Apr 25;6:e20731. doi: 10.7554/eLife.20731 (PMC5443663; doi:10.7554/eLife.20731)
Supplement: Figure 8—source data 1. — RMS calculated over 40 ms time segments during an interval with a target signal and masker separated by 90° and broadcast at varied signal-to-noise ratios (−18, –12, −6, 0, +6 dB), and an equivalent time window during masker broadcast alone. Signal detection theory was applied to RMS measurements to determine masked thresholds for the masker ipsi- and contralateral ears. These data are plotted in Figure 8C. DOI: http://dx.doi.org/10.7554/eLife.20731.031 [file elife-20731-fig8-data1.xlsx]

## Sheet: fly1
	Masker-ipsilateral Ear								Masker-contralateral Ear
Epoch	First Signal Alone	Masker Alone	-18dB SNR	-12dB SNR	-6dB SNR	0dB SNR	+6dB SNR	Last Signal Alone	First Signal Alone	Masker Alone	-18dB SNR	-12dB SNR	-6dB SNR	0dB SNR	+6dB SNR	Last Signal Alone
noise_alone_rep1	0.222491	0.331187	0.261765	0.28737	0.292973	0.345105	0.322019	0.291286	0.384018	0.571785	0.353836	0.406878	0.405938	0.521205	0.542272	0.294353
noise_alone_rep2	0.252374	0.356375	0.24613	0.259873	0.28948	0.341582	0.334045	0.296046	0.374581	0.541105	0.384033	0.427109	0.46492	0.566361	0.540977	0.272711
noise_alone_rep3	0.235744	0.360902	0.235482	0.261184	0.30142	0.343834	0.325185	0.312476	0.348864	0.551986	0.382999	0.409639	0.491842	0.580311	0.549129	0.245901
noise_alone_rep4	0.199823	0.33316	0.249081	0.269452	0.276661	0.347198	0.334766	0.307996	0.300936	0.564283	0.350095	0.430218	0.454437	0.554174	0.538804	0.288891
noise_alone_rep5	0.233573	0.373701	0.258869	0.248584	0.295617	0.333647	0.312123	0.346463	0.350613	0.531697	0.359277	0.41408	0.466524	0.547401	0.552624	0.287402
noise_alone_rep6	0.203604	0.329791	0.248712	0.249204	0.295863	0.34985	0.345185	0.332392	0.372357	0.529387	0.359425	0.405091	0.459057	0.522542	0.493661	0.268452
noise_alone_rep7	0.205411	0.352441	0.24813	0.277196	0.30206	0.342222	0.382014	0.359998	0.347147	0.557702	0.37905	0.354558	0.410512	0.515451	0.521211	0.28239
noise_alone_rep8	0.223188	0.352903	0.226856	0.284943	0.311722	0.355683	0.31598	0.311495	0.388057	0.533827	0.340245	0.376469	0.455714	0.537189	0.560256	0.266814
noise_alone_rep9	0.224553	0.338917	0.232845	0.280702	0.306813	0.346312	0.334268	0.300015	0.317746	0.576175	0.371208	0.393559	0.438352	0.545405	0.565148	0.259895
noise_alone_rep10	0.201955	0.348752	0.222407	0.25635	0.305476	0.332733	0.325155	0.342151	0.317527	0.519873	0.343447	0.380871	0.454564	0.5489	0.504105	0.28222
noise_alone_rep11	0.219522	0.345673	0.242474	0.267208	0.274935	0.376482	0.317343	0.377665	0.323449	0.521664	0.355223	0.38439	0.420695	0.537188	0.502831	0.274484
noise_alone_rep12	0.199757	0.373134	0.234715	0.258932	0.284047	0.360255	0.354918	0.316242	0.359718	0.511003	0.353154	0.367859	0.444279	0.578503	0.514272	0.25998
noise_alone_rep13	0.221622	0.331481	0.225406	0.297094	0.291465	0.378149	0.345441	0.334451	0.336978	0.525763	0.379782	0.387507	0.460229	0.568991	0.569233	0.268634
noise_alone_rep14	0.208303	0.346572	0.229249	0.261685	0.310375	0.359743	0.336173	0.315605	0.323789	0.550916	0.368629	0.399633	0.44627	0.500261	0.528486	0.273837
noise_alone_rep15	0.189934	0.368213	0.245006	0.291435	0.276998	0.351605	0.330587	0.32675	0.349755	0.52347	0.360965	0.392106	0.435335	0.512099	0.537963	0.250799
noise_alone_rep16	0.216399	0.366645	0.235807	0.268258	0.288678	0.33735	0.368729	0.308852	0.346816	0.553354	0.385452	0.38426	0.455816	0.532386	0.548088	0.278958
noise_alone_rep17	0.19446	0.351375	0.230414	0.270281	0.293124	0.347082	0.33176	0.30791	0.312163	0.583945	0.343845	0.393049	0.439262	0.555648	0.552391	0.247091
noise_alone_rep18	0.218653	0.347893	0.243059	0.243123	0.289285	0.325727	0.340361	0.319186	0.357237	0.528152	0.352216	0.415336	0.4724	0.531693	0.509599	0.284778
noise_alone_rep19	0.200863	0.335033	0.242741	0.267576	0.316786	0.325664	0.322277	0.336791	0.357686	0.51201	0.366196	0.402755	0.467666	0.542159	0.555789	0.275657
noise_alone_rep20	0.200488	0.338877	0.241978	0.278388	0.283515	0.324332	0.359028	0.316562	0.361471	0.563616	0.338491	0.407653	0.461509	0.568355	0.562067	0.272738
noise_and_sig_rep1	0.324837	0.350145	0.29626	0.274287	0.299094	0.327058	0.324133	0.489879	0.576301	0.49187	0.426058	0.50773	0.477389	0.526839	0.567847	0.420779
noise_and_sig_rep2	0.375656	0.333631	0.259947	0.308639	0.295335	0.310648	0.345588	0.507019	0.609072	0.527583	0.432153	0.441925	0.516651	0.539457	0.545055	0.390435
noise_and_sig_rep3	0.37146	0.315173	0.311772	0.286681	0.272173	0.333682	0.325082	0.618213	0.681291	0.538224	0.47556	0.477765	0.479776	0.555465	0.498728	0.438121
noise_and_sig_rep4	0.33821	0.353144	0.290449	0.256506	0.286545	0.345985	0.320377	0.590109	0.524456	0.53079	0.444633	0.493843	0.487639	0.553425	0.544143	0.418048
noise_and_sig_rep5	0.34097	0.317151	0.290724	0.274711	0.250798	0.328851	0.325448	0.551597	0.543179	0.502051	0.513634	0.485127	0.475378	0.518846	0.501623	0.454308
noise_and_sig_rep6	0.325531	0.334325	0.272177	0.290126	0.302261	0.345137	0.338532	0.558983	0.594011	0.530522	0.470426	0.48408	0.489889	0.495037	0.537923	0.410801
noise_and_sig_rep7	0.327432	0.32913	0.274971	0.276452	0.299418	0.349594	0.354561	0.532648	0.512029	0.551299	0.46114	0.45003	0.502787	0.514989	0.539327	0.402199
noise_and_sig_rep8	0.352424	0.343436	0.27755	0.246793	0.296803	0.322489	0.341581	0.517107	0.593572	0.53272	0.470192	0.519342	0.503289	0.480767	0.529588	0.476297
noise_and_sig_rep9	0.324006	0.330974	0.266575	0.277139	0.284014	0.335783	0.31893	0.524814	0.538359	0.537949	0.487847	0.46747	0.518633	0.524691	0.543902	0.394266
noise_and_sig_rep10	0.318944	0.335276	0.250744	0.264092	0.296757	0.348538	0.332249	0.641281	0.579503	0.503569	0.480786	0.458532	0.471223	0.50614	0.525386	0.421172
noise_and_sig_rep11	0.327514	0.316305	0.277283	0.26319	0.279245	0.318744	0.306579	0.606932	0.562096	0.511963	0.435924	0.491803	0.523033	0.536021	0.525052	0.389609
noise_and_sig_rep12	0.326413	0.365873	0.276262	0.295089	0.2925	0.353497	0.309427	0.565822	0.555717	0.523683	0.501129	0.500334	0.488957	0.533207	0.517281	0.403187
noise_and_sig_rep13	0.305593	0.345934	0.270404	0.281417	0.309591	0.336721	0.321347	0.503142	0.545858	0.571205	0.535893	0.506029	0.487036	0.555642	0.54062	0.384126
noise_and_sig_rep14	0.319183	0.366683	0.266194	0.275564	0.2926	0.322916	0.330304	0.604625	0.560853	0.502326	0.498228	0.457647	0.474675	0.563422	0.561975	0.423279
noise_and_sig_rep15	0.297356	0.340193	0.260276	0.295299	0.294076	0.326249	0.321959	0.584763	0.511223	0.520985	0.450054	0.45129	0.48686	0.512286	0.51934	0.394203
noise_and_sig_rep16	0.333725	0.339391	0.25493	0.247526	0.314244	0.369463	0.321031	0.573557	0.539496	0.554649	0.493639	0.409335	0.554951	0.553957	0.537963	0.394813
noise_and_sig_rep17	0.348808	0.342126	0.253378	0.282072	0.285108	0.318012	0.299735	0.625744	0.587524	0.488846	0.503689	0.489684	0.469201	0.539476	0.51762	0.425638
noise_and_sig_rep18	0.351419	0.336497	0.27306	0.296517	0.283822	0.304427	0.348344	0.584856	0.52932	0.456472	0.426791	0.479981	0.464332	0.580029	0.495101	0.422442
noise_and_sig_rep19	0.32798	0.358354	0.296601	0.288754	0.331811	0.307032	0.299037	0.556773	0.564399	0.533623	0.496531	0.503127	0.48172	0.536591	0.543169	0.464564
noise_and_sig_rep20	0.334975	0.318903	0.265148	0.259807	0.303234	0.327509	0.327402	0.5776	0.531567	0.511661	0.494268	0.464642	0.504378	0.544447	0.539713	0.444178

## Sheet: fly2
	Masker-ipsilateral Ear								Masker-contralateral Ear
Epoch	First Signal Alone	Masker Alone	-18dB SNR	-12dB SNR	-6dB SNR	0dB SNR	+6dB SNR	Last Signal Alone	First Signal Alone	Masker Alone	-18dB SNR	-12dB SNR	-6dB SNR	0dB SNR	+6dB SNR	Last Signal Alone
noise_alone_rep1	0.358717	0.63998	0.407175	0.445543	0.491858	0.64136	0.623253	0.358717	0.22248	0.36259	0.210607	0.258629	0.254949	0.350279	0.303337	0.22248
noise_alone_rep2	0.401353	0.682702	0.390724	0.466941	0.570095	0.668855	0.606538	0.401353	0.218172	0.349501	0.191238	0.2525	0.270647	0.348093	0.302534	0.218172
noise_alone_rep3	0.415829	0.733413	0.410185	0.499995	0.56596	0.681057	0.592958	0.415829	0.221136	0.351179	0.232669	0.236259	0.276392	0.32085	0.316786	0.221136
noise_alone_rep4	0.397026	0.650492	0.37753	0.48156	0.567592	0.63651	0.609176	0.397026	0.229148	0.393006	0.231944	0.239457	0.264542	0.339846	0.300481	0.229148
noise_alone_rep5	0.369665	0.691339	0.44612	0.408926	0.544341	0.667728	0.581645	0.369665	0.207969	0.324084	0.239173	0.248087	0.240888	0.347387	0.281548	0.207969
noise_alone_rep6	0.411926	0.757884	0.465291	0.391923	0.507576	0.648834	0.579977	0.411926	0.217625	0.401667	0.21187	0.228405	0.237111	0.335555	0.265771	0.217625
noise_alone_rep7	0.438619	0.698339	0.393895	0.423522	0.491207	0.698456	0.593476	0.438619	0.217972	0.348049	0.206645	0.231291	0.252432	0.367551	0.309175	0.217972
noise_alone_rep8	0.404693	0.684545	0.354941	0.402065	0.546577	0.668803	0.6497	0.404693	0.224069	0.383943	0.226667	0.23299	0.258958	0.350498	0.318197	0.224069
noise_alone_rep9	0.371549	0.77094	0.363996	0.43159	0.549311	0.631041	0.636051	0.371549	0.235254	0.348363	0.215946	0.223628	0.246387	0.345045	0.285197	0.235254
noise_alone_rep10	0.359026	0.758414	0.390524	0.424877	0.512709	0.704148	0.596464	0.359026	0.229684	0.369783	0.211049	0.246003	0.271676	0.32807	0.282772	0.229684
noise_alone_rep11	0.366408	0.702926	0.371312	0.446817	0.520726	0.664525	0.585718	0.366408	0.213881	0.365924	0.209325	0.256672	0.266671	0.325964	0.293187	0.213881
noise_alone_rep12	0.365697	0.669979	0.360614	0.411708	0.523619	0.663671	0.641198	0.365697	0.21431	0.383984	0.232445	0.238136	0.247063	0.328495	0.308081	0.21431
noise_alone_rep13	0.351269	0.711426	0.361257	0.419427	0.501419	0.699127	0.652719	0.351269	0.197917	0.375788	0.233884	0.217094	0.23809	0.361997	0.301761	0.197917
noise_alone_rep14	0.38447	0.753449	0.363533	0.434382	0.555563	0.605955	0.590124	0.38447	0.203553	0.373657	0.206933	0.22413	0.253481	0.349427	0.285101	0.203553
noise_alone_rep15	0.371879	0.756125	0.436852	0.430438	0.521119	0.65301	0.578705	0.371879	0.208657	0.327821	0.212768	0.234755	0.266062	0.356331	0.271922	0.208657
noise_alone_rep16	0.416252	0.738956	0.478748	0.40155	0.529799	0.731859	0.586464	0.416252	0.2098	0.333327	0.218254	0.232179	0.24255	0.32755	0.292434	0.2098
noise_alone_rep17	0.435877	0.717633	0.455759	0.443375	0.505138	0.671859	0.596925	0.435877	0.234392	0.336124	0.222541	0.25446	0.254283	0.319862	0.292141	0.234392
noise_alone_rep18	0.413561	0.646323	0.400602	0.453538	0.5611	0.693957	0.968773	0.413561	0.209428	0.352572	0.227131	0.241033	0.289854	0.338495	0.311279	0.209428
noise_alone_rep19	0.347971	0.711907	0.353733	0.443552	0.574304	0.684809	0.641729	0.347971	0.219679	0.333904	0.223138	0.246272	0.245737	0.323162	0.314112	0.219679
noise_alone_rep20	0.350919	0.756715	0.359427	0.545963	0.531964	0.695715	0.625618	0.350919	0.224073	0.342823	0.221135	0.231712	0.271777	0.319581	0.298823	0.224073
noise_and_sig_rep1	0.51654	0.639087	0.502887	0.515032	0.511639	0.760149	0.595451	0.51654	0.238079	0.33999	0.242748	0.296532	0.257771	0.335697	0.297229	0.238079
noise_and_sig_rep2	0.423302	0.622061	0.507146	0.510741	0.491922	0.712331	0.556329	0.423302	0.230314	0.349093	0.250738	0.284975	0.258665	0.326353	0.298993	0.230314
noise_and_sig_rep3	0.417281	0.609792	0.450289	0.502811	0.545327	0.650321	0.58967	0.417281	0.236992	0.341545	0.252116	0.277375	0.274872	0.330657	0.292248	0.236992
noise_and_sig_rep4	0.431607	0.681192	0.463979	0.489748	0.539827	0.643814	0.608405	0.431607	0.231772	0.345166	0.256733	0.26738	0.269873	0.31302	0.302511	0.231772
noise_and_sig_rep5	0.48448	0.644947	0.454032	0.47537	0.519787	0.629418	0.506054	0.48448	0.265645	0.345433	0.252904	0.259225	0.286516	0.355796	0.278266	0.265645
noise_and_sig_rep6	0.460327	0.715108	0.456859	0.467082	0.517098	0.634743	0.61062	0.460327	0.233157	0.348601	0.274043	0.257351	0.290815	0.325447	0.280324	0.233157
noise_and_sig_rep7	0.502787	0.650397	0.450565	0.479514	0.504819	0.626365	0.580047	0.502787	0.238387	0.34466	0.232373	0.261849	0.266705	0.360185	0.309479	0.238387
noise_and_sig_rep8	0.454371	0.639321	0.457864	0.502646	0.488717	0.693155	0.609746	0.454371	0.243329	0.379902	0.252031	0.25198	0.288307	0.312597	0.267119	0.243329
noise_and_sig_rep9	0.409328	0.621489	0.418627	0.501331	0.49684	0.631164	0.604115	0.409328	0.236709	0.34697	0.239792	0.274205	0.263373	0.368672	0.280261	0.236709
noise_and_sig_rep10	0.441027	0.660538	0.487028	0.459591	0.542594	0.59835	0.577462	0.441027	0.238198	0.344115	0.278804	0.251955	0.27004	0.346499	0.309809	0.238198
noise_and_sig_rep11	0.427364	0.701832	0.458968	0.466182	0.528677	0.640265	0.618134	0.427364	0.232665	0.336342	0.258264	0.263159	0.279747	0.362866	0.302831	0.232665
noise_and_sig_rep12	0.436365	0.656021	0.449428	0.493927	0.544886	0.711536	0.564307	0.436365	0.257051	0.352807	0.249394	0.273417	0.291598	0.357324	0.289399	0.257051
noise_and_sig_rep13	0.460896	0.689461	0.467292	0.491462	0.549473	0.645034	0.641261	0.460896	0.237234	0.372517	0.248337	0.253525	0.273712	0.360179	0.289907	0.237234
noise_and_sig_rep14	0.450207	0.689392	0.478008	0.498293	0.538917	0.669625	0.581755	0.450207	0.237204	0.362606	0.229239	0.258832	0.291131	0.349104	0.276596	0.237204
noise_and_sig_rep15	0.409933	0.725221	0.477265	0.50923	0.565837	0.597831	0.562812	0.409933	0.246665	0.340808	0.221706	0.24584	0.268081	0.35541	0.291998	0.246665
noise_and_sig_rep16	0.46451	0.693528	0.535272	0.499352	0.496485	0.637678	0.570628	0.46451	0.254454	0.323605	0.246829	0.261749	0.273639	0.348381	0.299508	0.254454
noise_and_sig_rep17	0.497164	0.612986	0.475621	0.489058	0.545113	0.640129	0.570722	0.497164	0.223081	0.367008	0.242826	0.252752	0.278706	0.339158	0.302651	0.223081
noise_and_sig_rep18	0.451944	0.683888	0.469492	0.483578	0.517221	0.700139	0.707827	0.451944	0.229968	0.367207	0.242083	0.264316	0.265404	0.352053	0.304655	0.229968
noise_and_sig_rep19	0.406376	0.700845	0.418285	0.446833	0.510414	0.618698	0.568291	0.406376	0.227029	0.353614	0.23985	0.231139	0.281547	0.314677	0.280394	0.227029
noise_and_sig_rep20	0.421182	0.611067	0.406292	0.59209	0.544752	0.56685	0.675195	0.421182	0.231819	0.358306	0.245379	0.245081	0.27647	0.31763	0.302018	0.231819

## Sheet: fly3
	Masker-ipsilateral Ear								Masker-contralateral Ear
Epoch	First Signal Alone	Masker Alone	-18dB SNR	-12dB SNR	-6dB SNR	0dB SNR	+6dB SNR	Last Signal Alone	First Signal Alone	Masker Alone	-18dB SNR	-12dB SNR	-6dB SNR	0dB SNR	+6dB SNR	Last Signal Alone
noise_alone_rep1	0.151079	0.302936	0.233788	0.266815	0.290159	0.324331	0.287998	0.142843	0.154734	0.282912	0.198774	0.261593	0.273736	0.302205	0.287797	0.156268
noise_alone_rep2	0.476186	0.31291	0.206277	0.252249	0.294074	0.314215	0.292533	0.148511	0.495925	0.241479	0.201161	0.233936	0.254324	0.282202	0.325284	0.150319
noise_alone_rep3	0.165784	0.309165	0.215676	0.259562	0.275517	0.285576	0.277535	0.130551	0.149275	0.292878	0.208271	0.216906	0.259208	0.275231	0.295745	0.157513
noise_alone_rep4	0.145419	0.328145	0.228961	0.270675	0.299661	0.327994	0.306484	0.145354	0.135231	0.247429	0.205952	0.233506	0.263092	0.285645	0.308848	0.147534
noise_alone_rep5	0.178701	0.284404	0.225995	0.256097	0.273684	0.342393	0.29724	0.145205	0.142535	0.264352	0.208023	0.22815	0.247322	0.278273	0.292701	0.158171
noise_alone_rep6	0.174794	0.301806	0.21606	0.259394	0.289478	0.304206	0.275685	0.137172	0.15717	0.264291	0.209442	0.231933	0.271683	0.279136	0.317245	0.14511
noise_alone_rep7	0.159525	0.3058	0.246437	0.271643	0.289264	0.29894	0.28727	0.132521	0.149203	0.259897	0.20335	0.232588	0.264459	0.273417	0.30393	0.150928
noise_alone_rep8	0.153314	0.343361	0.231455	0.248293	0.301138	0.333356	0.292247	0.147938	0.13556	0.272759	0.193074	0.244072	0.278818	0.258408	0.298829	0.166092
noise_alone_rep9	0.16794	0.315459	0.220106	0.2676	0.264655	0.315131	0.301901	0.153047	0.14186	0.255322	0.191022	0.224531	0.264286	0.269278	0.29249	0.139622
noise_alone_rep10	0.170333	0.325383	0.210536	0.257298	0.282692	0.315389	0.272274	0.143462	0.15587	0.282535	0.19784	0.230949	0.262879	0.281919	0.322084	0.164667
noise_alone_rep11	0.145432	0.336815	0.227307	0.271538	0.288745	0.297722	0.28056	0.148931	0.15117	0.290926	0.222129	0.221252	0.2501	0.274633	0.282557	0.150087
noise_alone_rep12	0.158753	0.315547	0.214982	0.254217	0.283828	0.336038	0.291116	0.155628	0.136816	0.294189	0.201203	0.22164	0.250973	0.295988	0.305408	0.171848
noise_alone_rep13	0.157518	0.330655	0.206885	0.264957	0.300739	0.288758	0.265425	0.147545	0.144848	0.257352	0.188043	0.226107	0.243608	0.270539	0.294625	0.167375
noise_alone_rep14	0.17169	0.32625	0.203564	0.26778	0.302304	0.307826	0.263324	0.160645	0.143618	0.281226	0.195983	0.230248	0.264906	0.277427	0.303046	0.162277
noise_alone_rep15	0.160447	0.308513	0.229417	0.272636	0.295966	0.292894	0.295847	0.134884	0.146173	0.278267	0.190637	0.215723	0.286483	0.285985	0.301087	0.152855
noise_alone_rep16	0.183683	0.311279	0.22138	0.280663	0.295066	0.294425	0.262439	0.142516	0.14997	0.294408	0.200623	0.247599	0.259459	0.264929	0.318535	0.159417
noise_alone_rep17	0.173604	0.32156	0.238396	0.270426	0.305601	0.302382	0.263358	0.143185	0.144246	0.27316	0.214036	0.223921	0.276017	0.278658	0.287196	0.157337
noise_alone_rep18	0.177492	0.327388	0.219241	0.257399	0.287102	0.302032	0.298756	0.146632	0.162897	0.284652	0.215559	0.20725	0.259884	0.262812	0.318334	0.163194
noise_alone_rep19	0.174094	0.330004	0.233059	0.282143	0.310753	0.339445	0.265705	0.134577	0.127432	0.273005	0.177258	0.240564	0.259945	0.289019	0.337849	0.162772
noise_alone_rep20	0.164479	0.308623	0.224251	0.283239	0.293198	0.290705	0.276018	0.144539	0.132249	0.278237	0.197039	0.227223	0.248644	0.275152	0.310351	0.164207
noise_and_sig_rep1	0.252818	0.288805	0.249516	0.259907	0.309543	0.279297	0.264701	0.23918	0.243617	0.250656	0.254963	0.271714	0.275572	0.267376	0.299872	0.276425
noise_and_sig_rep2	0.58531	0.284724	0.263248	0.276361	0.332232	0.284537	0.282499	0.236743	0.56746	0.244549	0.253984	0.249386	0.284117	0.284007	0.329368	0.229509
noise_and_sig_rep3	0.294899	0.28803	0.218159	0.251997	0.27231	0.305579	0.316177	0.25003	0.286216	0.260996	0.23261	0.251969	0.248185	0.267863	0.330669	0.264775
noise_and_sig_rep4	0.301082	0.32005	0.231039	0.258612	0.269912	0.284254	0.277774	0.245688	0.263759	0.27007	0.244653	0.267673	0.296613	0.290144	0.292974	0.262378
noise_and_sig_rep5	0.283616	0.304874	0.263752	0.238849	0.286636	0.304822	0.263649	0.208464	0.2797	0.26019	0.259269	0.273551	0.269477	0.294501	0.312523	0.255727
noise_and_sig_rep6	0.294291	0.319164	0.215105	0.292892	0.263076	0.292547	0.282731	0.237749	0.274429	0.25998	0.266533	0.254863	0.276765	0.290991	0.306495	0.260745
noise_and_sig_rep7	0.265128	0.285395	0.246314	0.265711	0.271003	0.293325	0.279734	0.244376	0.264672	0.268971	0.234609	0.287223	0.274117	0.307564	0.320629	0.254864
noise_and_sig_rep8	0.270784	0.300086	0.230212	0.28046	0.285725	0.277716	0.277115	0.240483	0.266783	0.266473	0.259456	0.275474	0.261817	0.296101	0.281123	0.303972
noise_and_sig_rep9	0.280744	0.29376	0.245837	0.261142	0.276055	0.306689	0.279915	0.241482	0.237796	0.267589	0.251171	0.272073	0.263165	0.280334	0.298833	0.253035
noise_and_sig_rep10	0.290172	0.324871	0.244516	0.257889	0.268289	0.286684	0.289343	0.225815	0.267832	0.261739	0.254607	0.27747	0.299302	0.305579	0.316395	0.286176
noise_and_sig_rep11	0.28576	0.290083	0.231312	0.256889	0.296706	0.281045	0.254363	0.22562	0.266073	0.25352	0.263711	0.249441	0.259107	0.265645	0.293045	0.241972
noise_and_sig_rep12	0.240814	0.30893	0.237155	0.262587	0.292537	0.305783	0.288555	0.252834	0.247214	0.257369	0.251295	0.242572	0.27495	0.270063	0.326935	0.261712
noise_and_sig_rep13	0.285453	0.325847	0.241608	0.24456	0.298064	0.345685	0.28323	0.225418	0.278012	0.265471	0.294766	0.250622	0.256827	0.278971	0.307191	0.256733
noise_and_sig_rep14	0.264546	0.324097	0.249162	0.260373	0.292196	0.299627	0.27922	0.218607	0.301342	0.28029	0.241834	0.255631	0.272068	0.285499	0.299934	0.24893
noise_and_sig_rep15	0.274759	0.292321	0.265939	0.236306	0.256911	0.302351	0.328126	0.239698	0.293942	0.273005	0.225382	0.269831	0.280629	0.311349	0.329507	0.272504
noise_and_sig_rep16	0.257903	0.31071	0.254234	0.249831	0.300351	0.304974	0.290984	0.222061	0.281251	0.257577	0.26311	0.2504	0.261654	0.289597	0.316382	0.280966
noise_and_sig_rep17	0.297052	0.316237	0.224897	0.268906	0.273366	0.310895	0.295299	0.222596	0.279978	0.269775	0.253642	0.274854	0.259333	0.296235	0.308271	0.266257
noise_and_sig_rep18	0.281915	0.295927	0.222854	0.263427	0.262785	0.29073	0.278659	0.209366	0.305757	0.264209	0.23251	0.261007	0.274316	0.283768	0.310159	0.263335
noise_and_sig_rep19	0.275815	0.293564	0.226173	0.288463	0.289847	0.292459	0.2941	0.242883	0.260937	0.274941	0.25673	0.262616	0.25801	0.31455	0.330826	0.260909
noise_and_sig_rep20	0.258933	0.334243	0.273283	0.257447	0.278501	0.306117	0.273467	0.244217	0.24906	0.297651	0.255117	0.248809	0.258705	0.309955	0.305425	0.253381

## Sheet: fly4
	Masker-ipsilateral Ear								Masker-contralateral Ear
Epoch	First Signal Alone	Masker Alone	-18dB SNR	-12dB SNR	-6dB SNR	0dB SNR	+6dB SNR	Last Signal Alone	First Signal Alone	Masker Alone	-18dB SNR	-12dB SNR	-6dB SNR	0dB SNR	+6dB SNR	Last Signal Alone
noise_alone_rep1	0.0572235	0.0492494	0.0515959	0.0536724	0.0600657	0.0533878	0.0716297	0.0240378	0.0366277	0.0697349	0.0422215	0.0508485	0.0576106	0.0664892	0.0740171	0.0364393
noise_alone_rep2	0.054165	0.0483655	0.0451477	0.0583998	0.0581289	0.0494986	0.0741482	0.0256168	0.0388881	0.0680652	0.0395616	0.0440006	0.0583433	0.067661	0.0717279	0.0357203
noise_alone_rep3	0.0593255	0.0492404	0.0492084	0.0598396	0.0757735	0.0519278	0.0772919	0.0266599	0.0449148	0.0715365	0.040754	0.0485421	0.0590133	0.0745623	0.0700564	0.035613
noise_alone_rep4	0.0508325	0.0523896	0.0444236	0.0544807	0.0622139	0.0507161	0.0703257	0.0269912	0.0384977	0.0665899	0.0421617	0.0441083	0.0572053	0.0673195	0.0697394	0.0381791
noise_alone_rep5	0.0512735	0.0474115	0.0494973	0.0564952	0.0568648	0.0560932	0.0754172	0.0293174	0.0408573	0.0664187	0.0438294	0.0475918	0.0557892	0.0683086	0.0705823	0.0350233
noise_alone_rep6	0.0474879	0.103806	0.0507445	0.0600565	0.055861	0.0482393	0.0645904	0.0233701	0.0385786	0.223311	0.0424461	0.0462468	0.0579613	0.0758184	0.068966	0.0356693
noise_alone_rep7	0.0553565	0.0506904	0.0461013	0.0567903	0.061074	0.0489031	0.0729095	0.0265089	0.0396409	0.0741846	0.0434772	0.0499349	0.052625	0.0703907	0.0672768	0.0387422
noise_alone_rep8	0.05092	0.0422387	0.0416595	0.0569119	0.0648306	0.0490039	0.0660833	0.0269016	0.0352397	0.0615503	0.0459009	0.0532967	0.0522641	0.0702687	0.0635739	0.0395365
noise_alone_rep9	0.0449322	0.0507666	0.0455092	0.061121	0.0627332	0.0542449	0.0652829	0.025535	0.0361599	0.0703966	0.0403217	0.0530429	0.0573454	0.0672457	0.0683353	0.0390529
noise_alone_rep10	0.0436083	0.0449092	0.0460537	0.0528081	0.0569755	0.0500605	0.0737425	0.0272625	0.0385367	0.0691037	0.0407697	0.0502658	0.0561512	0.066974	0.0697322	0.039482
noise_alone_rep11	0.0469355	0.0481019	0.0487073	0.0551704	0.0627377	0.0535029	0.0717487	0.0257408	0.0368276	0.0705484	0.0398062	0.0477873	0.0586175	0.0628847	0.0672885	0.0363503
noise_alone_rep12	0.0432261	0.0519086	0.045716	0.0536842	0.0571711	0.0533926	0.0709872	0.0267798	0.0390241	0.0683931	0.0403473	0.043978	0.0573126	0.0676276	0.0709256	0.0370913
noise_alone_rep13	0.0395794	0.0469283	0.0459944	0.0614545	0.058945	0.0545375	0.0746927	0.0275818	0.0402815	0.0667734	0.039476	0.0491426	0.0523458	0.0673741	0.0697441	0.0346677
noise_alone_rep14	0.0410506	0.0528204	0.0476326	0.0571801	0.0624315	0.0519947	0.070582	0.0262794	0.0360989	0.0643636	0.0508015	0.0456989	0.0524962	0.0707312	0.0712933	0.036338
noise_alone_rep15	0.0418799	0.0530066	0.0473745	0.0538141	0.0549368	0.0519462	0.0760194	0.0269788	0.0398057	0.0672695	0.0426923	0.0464169	0.0558264	0.0640713	0.0742051	0.0339497
noise_alone_rep16	0.0420248	0.0473431	0.0446667	0.0537352	0.0579242	0.0566331	0.0769734	0.0254834	0.0365143	0.062695	0.0421945	0.0491734	0.0550598	0.0688154	0.0660893	0.0335021
noise_alone_rep17	0.0362809	0.0532942	0.0460143	0.0560533	0.0576321	0.0505869	0.0716969	0.0290048	0.0385079	0.0655403	0.0409525	0.0445628	0.0561329	0.0690426	0.0694912	0.0367494
noise_alone_rep18	0.0374004	0.0496456	0.044131	0.0596294	0.0549263	0.0590233	0.0651331	0.0258426	0.0377175	0.0661207	0.0394995	0.0484008	0.0564903	0.0666482	0.0671361	0.0320245
noise_alone_rep19	0.0351185	0.0484299	0.0441655	0.0545684	0.0618447	0.0537226	0.0747243	0.026533	0.0375778	0.0624105	0.0402892	0.0466721	0.0574872	0.0660804	0.0691454	0.0362083
noise_alone_rep20	0.0357143	0.054045	0.0508238	0.0502374	0.0667464	0.0516572	0.0753536	0.0268078	0.0411572	0.0651063	0.0440534	0.0483797	0.0594562	0.0625909	0.070948	0.0386696
noise_and_sig_rep1	0.0930765	0.0441946	0.0611086	0.0567789	0.0578219	0.0474001	0.067462	0.0671356	0.0664645	0.0650394	0.0646916	0.0611384	0.063095	0.0690349	0.0627375	0.0677995
noise_and_sig_rep2	0.0961019	0.0423435	0.0638848	0.0582423	0.0651987	0.0458527	0.0641695	0.0677759	0.0717109	0.065693	0.0656871	0.058413	0.0589536	0.0659968	0.0693927	0.0577714
noise_and_sig_rep3	0.0826139	0.0436315	0.0628544	0.0581819	0.067565	0.0486142	0.0671294	0.0677112	0.0634807	0.0591421	0.0689337	0.0671782	0.0660765	0.0681164	0.0707105	0.0603812
noise_and_sig_rep4	0.09327	0.0408623	0.0670332	0.0591139	0.0538497	0.0502875	0.0665011	0.0670316	0.0640927	0.062324	0.0666828	0.0633504	0.0648334	0.065679	0.0725271	0.0745379
noise_and_sig_rep5	0.087519	0.0435909	0.0607611	0.0611273	0.0555969	0.0472932	0.0692117	0.0648685	0.0770586	0.0625694	0.0546928	0.0634372	0.0638642	0.0747014	0.0673628	0.0679565
noise_and_sig_rep6	0.0912025	0.0901127	0.0561956	0.0625194	0.0551054	0.0461957	0.065663	0.0721236	0.0727056	0.202257	0.0727148	0.0586448	0.0630791	0.0704175	0.0672468	0.0668677
noise_and_sig_rep7	0.103855	0.0472312	0.0589822	0.0605269	0.0532061	0.0490004	0.0646208	0.0649153	0.0690294	0.0674588	0.0636739	0.0643329	0.0678035	0.0686411	0.0646198	0.0701925
noise_and_sig_rep8	0.0941936	0.0439895	0.0600356	0.0590709	0.0531251	0.051927	0.0689857	0.0679802	0.0671182	0.0663857	0.0574493	0.0638265	0.0571746	0.0651037	0.0703928	0.0629045
noise_and_sig_rep9	0.09622	0.0439496	0.0620056	0.062129	0.0573199	0.047176	0.0699864	0.0706742	0.065594	0.0612574	0.0611274	0.0574696	0.0632401	0.0693839	0.0690552	0.0677334
noise_and_sig_rep10	0.0919988	0.0455764	0.0646373	0.064073	0.0573499	0.0526787	0.0677593	0.0736851	0.0709778	0.0581501	0.0648198	0.0593368	0.0621641	0.0622123	0.065925	0.0629198
noise_and_sig_rep11	0.0970879	0.0480096	0.0649265	0.0571999	0.0522347	0.0469122	0.0653991	0.0701724	0.0709559	0.0620163	0.0596911	0.0705897	0.0707408	0.0640202	0.059722	0.0622297
noise_and_sig_rep12	0.09198	0.0434122	0.0612168	0.0553222	0.0571512	0.0501284	0.0654228	0.0717606	0.068962	0.0633809	0.0628581	0.060373	0.0626768	0.070269	0.0664794	0.0672273
noise_and_sig_rep13	0.0953931	0.0471058	0.0652289	0.0625017	0.0630654	0.0441105	0.0628412	0.0701423	0.0712264	0.0626837	0.0627532	0.0594421	0.0749489	0.0660274	0.0690956	0.0651059
noise_and_sig_rep14	0.0933268	0.045554	0.0671718	0.0570378	0.0557775	0.0487808	0.0657562	0.0683811	0.0739538	0.0609002	0.0640356	0.0604684	0.0617784	0.0677834	0.0718412	0.0625834
noise_and_sig_rep15	0.0926066	0.0439348	0.0666114	0.0523449	0.0577277	0.0494161	0.0608312	0.0743745	0.0685339	0.0674261	0.0658398	0.0572173	0.0643502	0.0620022	0.0689885	0.0623401
noise_and_sig_rep16	0.0992466	0.0502183	0.0582698	0.0565887	0.0573495	0.0505625	0.0719015	0.0767603	0.0708351	0.0595435	0.0601441	0.0662635	0.0604959	0.0676877	0.0705326	0.0704409
noise_and_sig_rep17	0.0990307	0.0458931	0.0585449	0.0639897	0.0556972	0.0497704	0.0656093	0.0677337	0.0692364	0.0568899	0.0614661	0.0600466	0.0610536	0.0633132	0.0656251	0.0643475
noise_and_sig_rep18	0.094522	0.0426371	0.0702752	0.0563876	0.0551967	0.0475993	0.0727615	0.0631834	0.0721984	0.0663352	0.0656024	0.0632164	0.0640087	0.0665462	0.0690347	0.0643881
noise_and_sig_rep19	0.0951497	0.0477592	0.0697892	0.0567909	0.0526523	0.0481802	0.0686521	0.0687367	0.0662104	0.0632569	0.0619228	0.06245	0.0667424	0.0682519	0.0704491	0.0681976
noise_and_sig_rep20	0.0959773	0.0506101	0.0677091	0.0599148	0.0517931	0.0496305	0.0709065	0.0705049	0.0692726	0.0637372	0.0622171	0.0697337	0.058819	0.0730552	0.0747487	0.0679085

## Sheet: fly6
	Masker-ipsilateral Ear								Masker-contralateral Ear
Epoch	First Signal Alone	Masker Alone	-18dB SNR	-12dB SNR	-6dB SNR	0dB SNR	+6dB SNR	Last Signal Alone	First Signal Alone	Masker Alone	-18dB SNR	-12dB SNR	-6dB SNR	0dB SNR	+6dB SNR	Last Signal Alone
noise_alone_rep1	0.0698271	0.157464	0.11819	0.115848	0.156836	0.14648	0.182542	0.0701842	0.0257158	0.0426643	0.0325702	0.0337184	0.0414607	0.0437606	0.0518703	0.0266812
noise_alone_rep2	0.062907	0.151233	0.111839	0.137575	0.154275	0.143295	0.162829	0.0694359	0.0266456	0.0402761	0.0323648	0.0400659	0.0391174	0.0434967	0.049948	0.0269357
noise_alone_rep3	0.0637716	0.15365	0.118101	0.125976	0.14485	0.144595	0.163121	0.0707495	0.0263187	0.0422271	0.0318556	0.0357766	0.0394186	0.04303	0.0487321	0.0262665
noise_alone_rep4	0.0662242	0.144237	0.120116	0.128489	0.140499	0.150941	0.173085	0.0684922	0.0264864	0.0408921	0.0307777	0.0392993	0.0401003	0.0449558	0.0487617	0.0287669
noise_alone_rep5	0.0652619	0.154069	0.116097	0.122316	0.14693	0.146424	0.1617	0.0666339	0.0277906	0.0446321	0.0350994	0.0369973	0.0375347	0.0398142	0.0497045	0.0255292
noise_alone_rep6	0.0612875	0.163106	0.104274	0.129465	0.151281	0.138551	0.173884	0.0639149	0.0264736	0.0408062	0.0291804	0.0366987	0.0407908	0.0430563	0.050123	0.0274159
noise_alone_rep7	0.0686843	0.146277	0.106866	0.117688	0.154436	0.141676	0.162878	0.0639419	0.0278913	0.0445113	0.0305107	0.0394754	0.0379469	0.0430438	0.0496181	0.0292395
noise_alone_rep8	0.0703436	0.144864	0.110146	0.128468	0.146927	0.142864	0.165298	0.0655884	0.0241191	0.0439468	0.0339667	0.0392479	0.0374264	0.0467775	0.0518539	0.0267927
noise_alone_rep9	0.0633402	0.150586	0.108301	0.122503	0.138146	0.167655	0.165393	0.0578643	0.0255061	0.0410324	0.0347183	0.037989	0.0376409	0.0395155	0.0453236	0.0268971
noise_alone_rep10	0.061537	0.141202	0.113273	0.125403	0.157942	0.15711	0.163058	0.0746259	0.0271002	0.041681	0.0325818	0.0369614	0.0390011	0.0453004	0.0499237	0.0268744
noise_alone_rep11	0.0640739	0.140029	0.107705	0.129135	0.145855	0.134098	0.160122	0.0690093	0.0273319	0.0401552	0.0346965	0.0349897	0.0401994	0.0454176	0.0464436	0.0265972
noise_alone_rep12	0.0626192	0.142996	0.121315	0.13027	0.158831	0.158498	0.158375	0.0726486	0.0245622	0.0410134	0.0340376	0.0371528	0.0408313	0.0469577	0.0493008	0.0296186
noise_alone_rep13	0.064753	0.146612	0.108069	0.133086	0.155859	0.150988	0.162371	0.0646145	0.0255654	0.0440461	0.0307557	0.0341311	0.0434688	0.0417304	0.0499752	0.0284181
noise_alone_rep14	0.0686058	0.145212	0.10928	0.118172	0.163132	0.147114	0.173912	0.0674835	0.0280347	0.0434846	0.0325475	0.038627	0.0411724	0.041326	0.0504591	0.0276906
noise_alone_rep15	0.0645099	0.137133	0.11023	0.130143	0.146452	0.15599	0.164422	0.0715089	0.0271304	0.0449627	0.0342191	0.0386256	0.040888	0.0450283	0.0476164	0.029803
noise_alone_rep16	0.063089	0.14034	0.107955	0.131192	0.164914	0.152104	0.168508	0.0622919	0.0265783	0.0439197	0.0312072	0.0363608	0.0401807	0.0456062	0.0456253	0.0268012
noise_alone_rep17	0.0664955	0.156289	0.100317	0.129775	0.143342	0.151394	0.171639	0.0722982	0.0279672	0.0433716	0.0318801	0.0382457	0.0400483	0.0447295	0.0505487	0.0304351
noise_alone_rep18	0.0695849	0.147812	0.103038	0.139013	0.148029	0.153942	0.164463	0.0668758	0.025391	0.0456546	0.0308568	0.0372664	0.0386492	0.0520371	0.0558862	0.0269023
noise_alone_rep19	0.0652179	0.140999	0.0988661	0.132398	0.153186	0.134308	0.168774	0.0666544	0.026442	0.042437	0.0305714	0.0384682	0.0364615	0.0418147	0.0522452	0.0247869
noise_alone_rep20	0.0674495	0.129203	0.105388	0.127505	0.145002	0.148351	0.161947	0.0753659	0.0254385	0.0463601	0.0323407	0.0364652	0.0431002	0.0422077	0.0457415	0.0273108
noise_and_sig_rep1	0.136211	0.135273	0.130317	0.131078	0.137262	0.151394	0.173444	0.13357	0.0432658	0.0431373	0.04312	0.0467527	0.0463556	0.0448174	0.0496088	0.0458392
noise_and_sig_rep2	0.123387	0.132406	0.117586	0.128426	0.167858	0.15962	0.164509	0.14512	0.043583	0.0415075	0.0531515	0.0409327	0.0454832	0.0415334	0.0485228	0.0531613
noise_and_sig_rep3	0.126548	0.146412	0.125578	0.137742	0.144795	0.14622	0.1478	0.141877	0.049032	0.0391192	0.0469528	0.0436476	0.0464014	0.0448745	0.0479211	0.0461814
noise_and_sig_rep4	0.135324	0.138958	0.134512	0.134787	0.137952	0.141482	0.154608	0.12661	0.0458903	0.0371058	0.0487006	0.0424012	0.0398008	0.0438149	0.0528864	0.0477997
noise_and_sig_rep5	0.128667	0.130198	0.123229	0.12872	0.134548	0.147018	0.153008	0.159977	0.0481103	0.0415318	0.0455413	0.0429474	0.0451166	0.0434832	0.0475396	0.0469662
noise_and_sig_rep6	0.113305	0.14668	0.121958	0.112663	0.138501	0.145951	0.148093	0.131095	0.0439728	0.0419629	0.0437598	0.044531	0.0430497	0.0466627	0.0475215	0.0460785
noise_and_sig_rep7	0.128838	0.13891	0.126209	0.123041	0.133686	0.145005	0.166231	0.137217	0.048392	0.0433835	0.0433637	0.0478723	0.0455256	0.0436291	0.0454111	0.0475155
noise_and_sig_rep8	0.115425	0.149449	0.124788	0.133734	0.137434	0.134715	0.163702	0.144669	0.0477579	0.0407765	0.047362	0.0465725	0.0435286	0.042617	0.0455328	0.0433147
noise_and_sig_rep9	0.136907	0.143951	0.119175	0.130515	0.136019	0.137535	0.155885	0.146072	0.0473987	0.0442045	0.0471042	0.0459897	0.0420553	0.0402796	0.0476117	0.0477749
noise_and_sig_rep10	0.128887	0.143238	0.129815	0.127335	0.139735	0.137746	0.15578	0.147199	0.0498239	0.0440287	0.0497968	0.0485448	0.0423899	0.0425003	0.0474448	0.046873
noise_and_sig_rep11	0.131736	0.14245	0.122936	0.131388	0.145328	0.14523	0.167517	0.139165	0.0447397	0.0398703	0.0431301	0.0484046	0.0414704	0.0457275	0.0461917	0.0492771
noise_and_sig_rep12	0.129791	0.126761	0.11572	0.119008	0.149601	0.138446	0.168353	0.136636	0.049116	0.0388354	0.0503581	0.0466304	0.0434713	0.0437598	0.0487795	0.0497658
noise_and_sig_rep13	0.121977	0.136348	0.117313	0.119472	0.148266	0.14331	0.166714	0.135419	0.0474766	0.0379785	0.0456969	0.0452151	0.045272	0.0470899	0.0483265	0.0487374
noise_and_sig_rep14	0.131684	0.139206	0.122368	0.117738	0.135872	0.144554	0.154774	0.135965	0.0429432	0.0437082	0.0518218	0.0461389	0.0448618	0.0413735	0.0484913	0.0436049
noise_and_sig_rep15	0.136502	0.13895	0.120327	0.139084	0.13932	0.141108	0.168414	0.146545	0.0453596	0.041321	0.0478361	0.041304	0.0406047	0.0429765	0.0428423	0.0545635
noise_and_sig_rep16	0.140777	0.131546	0.12417	0.130759	0.137913	0.151035	0.15706	0.137	0.0508133	0.0411608	0.048837	0.045057	0.0399297	0.0433461	0.0462067	0.0463522
noise_and_sig_rep17	0.122791	0.136357	0.139059	0.12317	0.145872	0.143575	0.177307	0.143542	0.0405009	0.0416252	0.0440967	0.0453606	0.0410266	0.0456097	0.0462437	0.0519717
noise_and_sig_rep18	0.132673	0.141177	0.117075	0.12803	0.138539	0.146452	0.157124	0.132449	0.0446752	0.0395966	0.0479777	0.0490292	0.0455253	0.0421668	0.0475924	0.050178
noise_and_sig_rep19	0.130141	0.137909	0.131652	0.119313	0.134789	0.148412	0.172916	0.135543	0.047175	0.0408377	0.0452294	0.0472159	0.0446923	0.0438749	0.0480403	0.0512504
noise_and_sig_rep20	0.119692	0.138487	0.114467	0.115979	0.143886	0.154961	0.166278	0.141482	0.0423081	0.0409517	0.0463475	0.0427001	0.049851	0.0443739	0.0447379	0.0476322

## Sheet: fly7
	Masker-ipsilateral Ear								Masker-contralateral Ear
Epoch	First Signal Alone	Masker Alone	-18dB SNR	-12dB SNR	-6dB SNR	0dB SNR	+6dB SNR	Last Signal Alone	First Signal Alone	Masker Alone	-18dB SNR	-12dB SNR	-6dB SNR	0dB SNR	+6dB SNR	Last Signal Alone
noise_alone_rep1	0.0291853	0.0329821	0.0296064	0.0320104	0.0356475	0.033846	0.0466143	0.0235553	0.0737414	0.0991805	0.0874235	0.0919038	0.102555	0.114199	0.147039	0.0778997
noise_alone_rep2	0.0296157	0.0353653	0.0291544	0.0304857	0.0351123	0.0431974	0.0459062	0.0237576	0.0767819	0.0982122	0.0838207	0.0937268	0.104625	0.109571	0.14183	0.0724789
noise_alone_rep3	0.0297108	0.0351825	0.0283252	0.0348831	0.0355378	0.0332686	0.0475498	0.0249865	0.0820168	0.109809	0.0914403	0.0879309	0.100375	0.112331	0.140832	0.0782141
noise_alone_rep4	0.0260734	0.0360825	0.0285867	0.037098	0.0351925	0.0395324	0.0460478	0.0277277	0.0727274	0.0995592	0.0928108	0.108252	0.098451	0.119097	0.136288	0.082741
noise_alone_rep5	0.0231515	0.0344721	0.0292337	0.0295029	0.0347681	0.0390929	0.044874	0.0335431	0.0561576	0.100109	0.0877261	0.0907072	0.105932	0.111657	0.142179	0.0970356
noise_alone_rep6	0.0207899	0.0361436	0.0280575	0.0387466	0.032768	0.03752	0.0426813	0.0231493	0.0544299	0.100734	0.0916597	0.108337	0.105493	0.108586	0.131549	0.0799077
noise_alone_rep7	0.0320108	0.0327241	0.0277474	0.0306981	0.0349775	0.0337397	0.0522392	0.0244617	0.0779001	0.0989736	0.08484	0.0949982	0.0950157	0.107655	0.156936	0.0740119
noise_alone_rep8	0.0200809	0.0336276	0.0376804	0.032594	0.0338525	0.0337199	0.0494076	0.0218481	0.0674495	0.0956974	0.0960495	0.0886381	0.105724	0.10911	0.152126	0.0778338
noise_alone_rep9	0.029575	0.0416829	0.036586	0.0315274	0.0336537	0.0399878	0.0485035	0.0343136	0.0780708	0.120399	0.0979874	0.0838402	0.104814	0.114354	0.139118	0.0954529
noise_alone_rep10	0.0208677	0.0336514	0.0317804	0.0367665	0.0326084	0.0402173	0.0471734	0.0299074	0.0590734	0.0970943	0.0947758	0.1018	0.101696	0.107422	0.135875	0.0885067
noise_alone_rep11	0.026396	0.0335598	0.0284355	0.0323955	0.0331012	0.0383066	0.051279	0.0292406	0.0721484	0.106926	0.0965664	0.0902933	0.103979	0.101413	0.14741	0.095622
noise_alone_rep12	0.0206745	0.0354469	0.0307719	0.0327605	0.0340237	0.0383654	0.0515058	0.0240127	0.0579278	0.114278	0.0917441	0.0920561	0.0951018	0.112775	0.163042	0.0724974
noise_alone_rep13	0.0205566	0.0319459	0.0279078	0.0358916	0.0328762	0.0386367	0.0475325	0.031974	0.0662908	0.10763	0.0876281	0.0983858	0.09484	0.121602	0.147119	0.0825007
noise_alone_rep14	0.0209541	0.0349206	0.0292512	0.0302983	0.0402653	0.0361299	0.0477009	0.0234712	0.0672414	0.102088	0.0819707	0.0918467	0.106023	0.106765	0.141567	0.0774672
noise_alone_rep15	0.024998	0.0359954	0.027425	0.0317084	0.0357686	0.0375596	0.0541749	0.0240278	0.0706347	0.109098	0.0843301	0.091195	0.0995159	0.118488	0.150517	0.0798694
noise_alone_rep16	0.0272181	0.0336191	0.0278928	0.0322925	0.0340166	0.0358942	0.0511911	0.0240981	0.073778	0.102576	0.085303	0.0971348	0.0938175	0.109312	0.141549	0.0817807
noise_alone_rep17	0.0277798	0.0355902	0.0310848	0.0332604	0.0326068	0.0325927	0.0464077	0.0232613	0.0760066	0.103634	0.0818661	0.0941335	0.0945827	0.101765	0.144047	0.0766718
noise_alone_rep18	0.027764	0.0332485	0.0285058	0.0321826	0.0316967	0.0396433	0.0509382	0.0295791	0.072226	0.0957987	0.0952917	0.102531	0.104632	0.115471	0.14959	0.0942943
noise_alone_rep19	0.02048	0.037145	0.0276404	0.0326452	0.0335762	0.0348193	0.0443989	0.0318441	0.0691705	0.0989581	0.0869109	0.0964157	0.107975	0.11113	0.140297	0.0951698
noise_alone_rep20	0.0223928	0.0321799	0.0285735	0.0338543	0.0310494	0.0424488	0.0476376	0.0263415	0.0648554	0.0943222	0.0855806	0.0989222	0.0953098	0.111576	0.144625	0.0854861
noise_and_sig_rep1	0.0298706	0.0317276	0.0341285	0.0314444	0.0359754	0.0330831	0.0475624	0.0374603	0.097414	0.0984113	0.110476	0.103913	0.109972	0.106379	0.145809	0.116982
noise_and_sig_rep2	0.0309863	0.0345163	0.0364384	0.0325338	0.0371918	0.0381729	0.0447181	0.0426168	0.0918199	0.102332	0.0963152	0.106398	0.106559	0.111518	0.140198	0.116817
noise_and_sig_rep3	0.0273741	0.03188	0.0349489	0.0303356	0.0349306	0.0403014	0.0421695	0.036331	0.0950451	0.102267	0.0927183	0.105798	0.118407	0.112307	0.144055	0.107966
noise_and_sig_rep4	0.0343648	0.0325402	0.0337077	0.0319485	0.0347138	0.0348869	0.0471163	0.0367505	0.0925977	0.106531	0.100106	0.0986445	0.109972	0.116043	0.140417	0.113805
noise_and_sig_rep5	0.0301998	0.0330129	0.0339233	0.0393756	0.035357	0.0373198	0.0471031	0.0344848	0.0928047	0.0947839	0.110687	0.114077	0.0951287	0.114784	0.151017	0.114257
noise_and_sig_rep6	0.0378598	0.0321842	0.0328576	0.0321538	0.0373703	0.0350755	0.0476272	0.0343356	0.0980199	0.0954058	0.103697	0.104664	0.106197	0.114509	0.137151	0.107302
noise_and_sig_rep7	0.0315445	0.0317848	0.0355175	0.0422832	0.0331139	0.0391798	0.04542	0.0387423	0.0813388	0.0915998	0.114509	0.11867	0.102666	0.113618	0.140432	0.112283
noise_and_sig_rep8	0.0372166	0.0321738	0.0329505	0.0314277	0.0328941	0.0385399	0.0486423	0.0373784	0.0967486	0.0989187	0.0989171	0.0961035	0.0978696	0.113917	0.153611	0.11688
noise_and_sig_rep9	0.0306199	0.0334631	0.0338352	0.0382155	0.0333709	0.0381738	0.0468911	0.0393535	0.0780399	0.0993936	0.106855	0.109228	0.0999421	0.107222	0.146479	0.107997
noise_and_sig_rep10	0.0397512	0.0340362	0.0334789	0.0337529	0.0323587	0.0369802	0.0462565	0.0397496	0.111277	0.0953967	0.109031	0.0939985	0.103984	0.115594	0.139753	0.118245
noise_and_sig_rep11	0.028671	0.0299949	0.0396016	0.0303465	0.0359272	0.0372449	0.0485997	0.0395279	0.0813622	0.100706	0.115106	0.0929925	0.105259	0.110504	0.142161	0.10792
noise_and_sig_rep12	0.0389608	0.0347016	0.0392563	0.0404022	0.0321275	0.0367134	0.0434893	0.0348746	0.10448	0.0974899	0.112459	0.120009	0.104998	0.11119	0.137947	0.112733
noise_and_sig_rep13	0.0358481	0.0316758	0.032132	0.0346314	0.0394709	0.037409	0.0502254	0.0330214	0.105959	0.112094	0.101906	0.105554	0.122289	0.129946	0.136537	0.115844
noise_and_sig_rep14	0.0299168	0.0337987	0.0325468	0.0335638	0.0343007	0.0406971	0.0520702	0.0376085	0.0885213	0.099712	0.104499	0.101302	0.102648	0.124039	0.146175	0.106445
noise_and_sig_rep15	0.0337798	0.0312262	0.0343591	0.0336081	0.0391426	0.0405594	0.0512508	0.0447244	0.0872333	0.100947	0.0961343	0.0998225	0.111011	0.108251	0.142623	0.111159
noise_and_sig_rep16	0.0343132	0.0325449	0.032292	0.0320804	0.0343973	0.0388896	0.0465769	0.0437999	0.0975133	0.110053	0.105822	0.0964637	0.103433	0.107447	0.135167	0.119634
noise_and_sig_rep17	0.0294336	0.0358507	0.0337992	0.0348085	0.0380911	0.0388467	0.0518942	0.0419084	0.0829078	0.0973677	0.103661	0.101954	0.109429	0.112937	0.150189	0.124492
noise_and_sig_rep18	0.0339055	0.0322846	0.0322949	0.0315146	0.032258	0.0391404	0.0426094	0.0349423	0.103886	0.0954036	0.10653	0.106796	0.0999277	0.124464	0.147718	0.105472
noise_and_sig_rep19	0.0368753	0.0379325	0.0311795	0.0405834	0.0309667	0.0348028	0.0500498	0.0385504	0.10366	0.110732	0.0996567	0.109081	0.106927	0.113154	0.137454	0.108212
noise_and_sig_rep20	0.0317965	0.0335884	0.0349969	0.0384199	0.0339348	0.0360772	0.0493436	0.0375645	0.0786381	0.0974886	0.0986789	0.103879	0.0968742	0.107528	0.145363	0.121401

## Sheet: fly8
	Masker-ipsilateral Ear								Masker-contralateral Ear
Epoch	First Signal Alone	Masker Alone	-18dB SNR	-12dB SNR	-6dB SNR	0dB SNR	+6dB SNR	Last Signal Alone	First Signal Alone	Masker Alone	-18dB SNR	-12dB SNR	-6dB SNR	0dB SNR	+6dB SNR	Last Signal Alone
noise_alone_rep1	0.022134	0.0269938	0.0218642	0.0247302	0.024258	0.0251565	0.0297838	0.0186428	0.0364801	0.0393377	0.0272947	0.0314574	0.0340884	0.038652	0.0398005	0.0263977
noise_alone_rep2	0.0222181	0.0268726	0.0218332	0.0221996	0.0236601	0.0256525	0.0287745	0.0192337	0.03301	0.0386984	0.0285153	0.0329517	0.031355	0.039167	0.0440664	0.0281728
noise_alone_rep3	0.0213691	0.027443	0.0216498	0.0236182	0.0235764	0.027363	0.0289001	0.0206438	0.0347971	0.0391822	0.028805	0.0293168	0.0328982	0.0428937	0.0395593	0.0290264
noise_alone_rep4	0.0214133	0.0289983	0.0215341	0.0223726	0.0251477	0.0264376	0.0312928	0.0186359	0.0334408	0.0409204	0.0299118	0.0284325	0.0337745	0.0383877	0.0413279	0.0277351
noise_alone_rep5	0.0214768	0.0275695	0.0203999	0.0231067	0.02348	0.0265855	0.0293891	0.0197986	0.031232	0.0412726	0.0277842	0.0292849	0.0348887	0.0388985	0.0387821	0.0295578
noise_alone_rep6	0.0217337	0.0265471	0.0223682	0.021992	0.0236898	0.0270128	0.0292282	0.0196922	0.0346399	0.0379927	0.0294586	0.0302544	0.0312741	0.0445822	0.0397737	0.0298015
noise_alone_rep7	0.0193687	0.025822	0.022569	0.0221563	0.0231743	0.0253594	0.0288905	0.0182385	0.0304515	0.0405391	0.0295047	0.0294364	0.0318993	0.0370596	0.0381643	0.026932
noise_alone_rep8	0.0211355	0.0242738	0.0225447	0.0230323	0.0254035	0.0271855	0.0278025	0.0199218	0.0325351	0.0372576	0.028915	0.0310323	0.0328856	0.0405771	0.039561	0.0301226
noise_alone_rep9	0.0215254	0.0252446	0.0233169	0.0230237	0.0224031	0.0255837	0.0303249	0.0172104	0.0363496	0.0393894	0.0305829	0.0290391	0.0328287	0.0410755	0.0408162	0.0252748
noise_alone_rep10	0.0191663	0.0272819	0.0228442	0.0239534	0.024418	0.0260785	0.0311346	0.017317	0.0314936	0.0399363	0.0312661	0.0299554	0.0341075	0.0407789	0.0416027	0.0249974
noise_alone_rep11	0.0193259	0.025612	0.0238899	0.023631	0.0228528	0.0247707	0.0295309	0.0185046	0.0297463	0.0395058	0.0319092	0.0299081	0.033158	0.04199	0.0388623	0.0277002
noise_alone_rep12	0.022347	0.0266505	0.022916	0.0240315	0.0238237	0.0283232	0.0287998	0.0187624	0.0390369	0.040073	0.0312122	0.0315689	0.0334943	0.0405681	0.0395894	0.0293751
noise_alone_rep13	0.0226871	0.0262503	0.0215472	0.0217598	0.0222258	0.0268099	0.0277228	0.0182707	0.0356644	0.0433301	0.0290956	0.0317847	0.0342824	0.0394584	0.0412049	0.0252169
noise_alone_rep14	0.0199792	0.0268607	0.021579	0.0231297	0.0228314	0.0268621	0.0261064	0.0199811	0.0370636	0.0383903	0.0261565	0.0274765	0.031787	0.0406512	0.0375859	0.0302863
noise_alone_rep15	0.0208734	0.0258564	0.0225187	0.0235294	0.0218215	0.025007	0.0302345	0.0191345	0.0355269	0.0407407	0.0279877	0.0325164	0.0322756	0.039518	0.040606	0.031572
noise_alone_rep16	0.0208406	0.0260948	0.0240609	0.0233033	0.0239355	0.0249857	0.0293796	0.0193565	0.0318922	0.0397968	0.0292485	0.0321473	0.0293935	0.0419618	0.0397809	0.0272531
noise_alone_rep17	0.0205667	0.027427	0.0208559	0.0235361	0.0230486	0.0246875	0.0310597	0.0196821	0.0342507	0.0422025	0.0293808	0.0296404	0.030951	0.0381313	0.0406892	0.0297205
noise_alone_rep18	0.0207583	0.0272906	0.0212313	0.0230992	0.0232621	0.0294239	0.0294321	0.0177744	0.0335601	0.0408753	0.0281616	0.0308486	0.0311898	0.0433852	0.0426833	0.025978
noise_alone_rep19	0.0214445	0.0257373	0.0215827	0.0239038	0.0244295	0.0286027	0.0282327	0.0195471	0.0339236	0.0370613	0.0289337	0.0326691	0.0322323	0.037382	0.0395631	0.0285828
noise_alone_rep20	0.0221866	0.0260345	0.0214576	0.0235843	0.0240897	0.0266841	0.0305171	0.0197319	0.0340549	0.0409608	0.0306067	0.0283234	0.0356381	0.0397574	0.0366391	0.030519
noise_and_sig_rep1	0.0277719	0.0263294	0.0242681	0.0241838	0.0233625	0.0264068	0.0295426	0.0221156	0.0466867	0.0414781	0.0344222	0.0352051	0.0353887	0.043294	0.0392261	0.0366645
noise_and_sig_rep2	0.0266012	0.0270922	0.0236619	0.0237425	0.0241824	0.0250834	0.0312248	0.0225331	0.0410261	0.0431196	0.0301195	0.0335312	0.0323618	0.0406014	0.0426343	0.0364325
noise_and_sig_rep3	0.0217312	0.0284795	0.0233915	0.0228738	0.0234467	0.0266089	0.0288715	0.0239038	0.0406624	0.0402488	0.0320686	0.0333786	0.0325849	0.03925	0.0435094	0.0359953
noise_and_sig_rep4	0.0235753	0.0267145	0.0233775	0.0244768	0.0222876	0.0259378	0.0296602	0.0245193	0.0387049	0.0402915	0.0316651	0.0328298	0.033598	0.0397208	0.0423807	0.0309401
noise_and_sig_rep5	0.0246502	0.0249829	0.0240388	0.0236593	0.0219481	0.0247031	0.0276668	0.0231714	0.0428428	0.0365925	0.0306284	0.0296683	0.0309772	0.041033	0.0404617	0.031185
noise_and_sig_rep6	0.0235392	0.0268231	0.0221974	0.0225845	0.0237437	0.0233556	0.030594	0.0245825	0.0405473	0.0398714	0.0369936	0.0311374	0.0331199	0.0371679	0.039961	0.0343888
noise_and_sig_rep7	0.0248685	0.0237159	0.0234874	0.0238998	0.0223221	0.0265161	0.0308899	0.0230501	0.0380872	0.0383994	0.032732	0.0332412	0.0336432	0.0435493	0.0424147	0.0361015
noise_and_sig_rep8	0.0248962	0.0251235	0.0241485	0.0235978	0.0226571	0.0256472	0.0292859	0.0229015	0.0393515	0.0393825	0.0348859	0.034513	0.0383645	0.0413484	0.0400729	0.0339369
noise_and_sig_rep9	0.0249719	0.0256095	0.0240045	0.0229302	0.0225647	0.0273092	0.0301619	0.0240169	0.0412752	0.0432764	0.0324131	0.0322447	0.0341051	0.0399196	0.0389819	0.0355518
noise_and_sig_rep10	0.026246	0.0253196	0.0249569	0.0234693	0.0241852	0.0253234	0.0277956	0.0212179	0.0421743	0.0374708	0.0357402	0.0350867	0.029648	0.0389954	0.0383043	0.0365723
noise_and_sig_rep11	0.0260513	0.0258323	0.0230227	0.0234007	0.0243292	0.0269735	0.0303237	0.0211169	0.0413449	0.0374043	0.0306702	0.0315486	0.0352961	0.0418341	0.0394572	0.0328626
noise_and_sig_rep12	0.0243137	0.0257527	0.0251994	0.0233406	0.0238144	0.0259014	0.0314221	0.0240594	0.0387571	0.0421729	0.0336643	0.0329107	0.0346298	0.0384842	0.040731	0.0324217
noise_and_sig_rep13	0.0254139	0.0265992	0.0221421	0.0233353	0.0244229	0.0238456	0.028713	0.0241397	0.0420786	0.0376299	0.0329296	0.033979	0.0338312	0.0375572	0.0384724	0.0355401
noise_and_sig_rep14	0.0235223	0.0263703	0.0251403	0.0245801	0.0228399	0.0259903	0.0303601	0.0229842	0.0410723	0.0379862	0.0352014	0.0327735	0.0330399	0.0417619	0.0373964	0.0341303
noise_and_sig_rep15	0.0252949	0.0243732	0.0241778	0.0227614	0.0230563	0.0255965	0.0291551	0.0247719	0.0378914	0.0378317	0.0344238	0.0341053	0.033997	0.0385474	0.0411223	0.031951
noise_and_sig_rep16	0.0248824	0.0251807	0.0240104	0.023613	0.0277532	0.0272731	0.027944	0.0236792	0.0384013	0.0399334	0.0321586	0.0315107	0.0304629	0.0372682	0.0389056	0.0332066
noise_and_sig_rep17	0.0229395	0.0267773	0.0229588	0.0230193	0.0252949	0.0262102	0.0286604	0.023742	0.0350922	0.0401484	0.0323398	0.0357785	0.0339055	0.0418212	0.0389732	0.0316934
noise_and_sig_rep18	0.0235904	0.0257739	0.0245296	0.0230668	0.0225569	0.0245797	0.0284903	0.0236094	0.0397003	0.0389844	0.0312342	0.0366191	0.0329364	0.0393465	0.0386354	0.033785
noise_and_sig_rep19	0.0248938	0.0261277	0.0227249	0.024112	0.0238107	0.0251024	0.0271256	0.0220448	0.0383353	0.0419093	0.0311682	0.0317255	0.0350141	0.0413899	0.036454	0.0327154
noise_and_sig_rep20	0.0248457	0.0230946	0.0233904	0.0229318	0.0227008	0.0264892	0.0314756	0.0227536	0.0394061	0.0349071	0.0310164	0.0304334	0.0318208	0.0420478	0.0440933	0.0316038

## Sheet: fly10
	Masker-ipsilateral Ear								Masker-contralateral Ear
Epoch	First Signal Alone	Masker Alone	-18dB SNR	-12dB SNR	-6dB SNR	0dB SNR	+6dB SNR	Last Signal Alone	First Signal Alone	Masker Alone	-18dB SNR	-12dB SNR	-6dB SNR	0dB SNR	+6dB SNR	Last Signal Alone
noise_alone_rep1	0.0172147	0.0242729	0.0209362	0.0240634	0.0242566	0.0245738	0.0301191	0.0184164	0.0261914	0.0335985	0.0255503	0.0273842	0.0303081	0.0297608	0.0376959	0.0261442
noise_alone_rep2	0.0181247	0.0250515	0.0205504	0.0229354	0.022748	0.025946	0.0302709	0.0185352	0.0287184	0.0331044	0.024726	0.0288351	0.0288811	0.0303931	0.0381016	0.0251781
noise_alone_rep3	0.016175	0.0251796	0.02103	0.0221665	0.0236047	0.0260442	0.0311715	0.0175942	0.0236304	0.0332955	0.0249858	0.0295127	0.0293206	0.0298945	0.0369199	0.0233726
noise_alone_rep4	0.0175182	0.0264901	0.020287	0.0211997	0.0248565	0.0249817	0.0319929	0.0186528	0.0260421	0.0318275	0.0281433	0.0281235	0.0312863	0.0311155	0.0366889	0.0254757
noise_alone_rep5	0.0172476	0.0248618	0.0205339	0.02157	0.0225224	0.0256271	0.0292555	0.0174668	0.0263386	0.03208	0.026424	0.025124	0.0314112	0.0339824	0.0361399	0.0243629
noise_alone_rep6	0.0171732	0.0255542	0.0213162	0.0224802	0.0228897	0.0244033	0.0311291	0.0168702	0.0247846	0.030005	0.0248164	0.0294475	0.0296687	0.0326692	0.037284	0.0226565
noise_alone_rep7	0.0180822	0.0231044	0.0219092	0.0216712	0.0220124	0.0254074	0.0291339	0.0177976	0.0232577	0.0329348	0.0257221	0.0242699	0.0281221	0.0313455	0.0371617	0.0251072
noise_alone_rep8	0.0168389	0.0264793	0.0222898	0.0227269	0.0217492	0.0246958	0.0294386	0.0169561	0.0242619	0.0340857	0.0245654	0.0303286	0.0287295	0.0344058	0.0349143	0.0247999
noise_alone_rep9	0.017911	0.0236334	0.020035	0.0224213	0.0228136	0.0232493	0.030794	0.0182196	0.0264772	0.0324027	0.0246208	0.0272659	0.0297835	0.0289475	0.0393872	0.024532
noise_alone_rep10	0.0178316	0.0236183	0.0203522	0.0234567	0.0238565	0.027318	0.031736	0.0154633	0.0277538	0.0324217	0.0260217	0.0277962	0.0313304	0.0337312	0.0365492	0.0211172
noise_alone_rep11	0.0171467	0.0266991	0.0205474	0.0209822	0.0228183	0.0239221	0.0288761	0.0167478	0.0264418	0.0316471	0.0272605	0.0255985	0.0285732	0.0329363	0.0366389	0.0253919
noise_alone_rep12	0.0171434	0.0257221	0.0197242	0.021427	0.0240712	0.0237245	0.0293182	0.0168532	0.0229778	0.0311951	0.0265252	0.0271404	0.029893	0.0318297	0.0315788	0.0243992
noise_alone_rep13	0.0173024	0.0252222	0.0214791	0.0226522	0.0247989	0.0253277	0.0301877	0.0171538	0.0258999	0.0350487	0.0267711	0.0274551	0.0291267	0.0301423	0.0329538	0.0249479
noise_alone_rep14	0.0182597	0.0251515	0.0207347	0.0231865	0.0232192	0.025982	0.0321891	0.0163488	0.0281936	0.0327658	0.0252562	0.0299658	0.0299517	0.0324461	0.0362567	0.024267
noise_alone_rep15	0.0168291	0.0251315	0.020365	0.0212238	0.0227537	0.0231461	0.0291659	0.017268	0.0257993	0.0303531	0.0259547	0.0249184	0.0281093	0.0303311	0.0357518	0.024346
noise_alone_rep16	0.0166658	0.0237527	0.0199334	0.0230204	0.0249122	0.0261692	0.0300381	0.0187292	0.0255554	0.0308517	0.0266918	0.0272329	0.0291466	0.0318497	0.0345397	0.0242847
noise_alone_rep17	0.0165639	0.0260361	0.0209447	0.0222377	0.023323	0.0254049	0.0335312	0.0175929	0.0239471	0.0314842	0.0229871	0.0276933	0.030068	0.0324278	0.0373381	0.0235151
noise_alone_rep18	0.0172792	0.0243802	0.0213638	0.0224347	0.024127	0.0247824	0.0310941	0.0180926	0.0227929	0.0309923	0.0288451	0.0264532	0.0317509	0.0294032	0.0387221	0.0265783
noise_alone_rep19	0.0168724	0.024012	0.0203453	0.0201989	0.0236018	0.0233844	0.032205	0.0183239	0.0239996	0.0280905	0.0279432	0.0271408	0.0302093	0.0344512	0.03889	0.0256154
noise_alone_rep20	0.0185838	0.0251476	0.0208846	0.0209808	0.0219653	0.0252968	0.0314295	0.0176145	0.0268696	0.0322667	0.0265771	0.0265179	0.0275595	0.0336062	0.0371469	0.0246687
noise_and_sig_rep1	0.0247657	0.0252005	0.0244902	0.0239798	0.0240373	0.0257083	0.0313236	0.0219955	0.0347842	0.0311181	0.0330889	0.0313766	0.0293194	0.0291309	0.0378039	0.0311171
noise_and_sig_rep2	0.0248453	0.0240347	0.0235244	0.0218575	0.022496	0.0249377	0.031173	0.0217669	0.0342522	0.0317004	0.0340455	0.029753	0.0294164	0.0328573	0.0382951	0.0289768
noise_and_sig_rep3	0.0243713	0.0239437	0.0228026	0.0257544	0.0237732	0.0234689	0.0330551	0.022719	0.0329453	0.0311859	0.0316366	0.0337471	0.0296183	0.0301718	0.0399241	0.0318575
noise_and_sig_rep4	0.0232942	0.0253808	0.0244111	0.0225793	0.0233144	0.0258367	0.0295903	0.0235564	0.0351973	0.0326233	0.0278797	0.0306933	0.0290874	0.0338784	0.0354736	0.0333663
noise_and_sig_rep5	0.0272076	0.023181	0.0249595	0.0240107	0.0230483	0.0234254	0.0320919	0.0252235	0.0372799	0.0287549	0.0339269	0.0291286	0.0308814	0.0314573	0.0401639	0.032609
noise_and_sig_rep6	0.024216	0.0233097	0.0240871	0.0248742	0.0228635	0.0245908	0.0321955	0.023025	0.0345428	0.0333625	0.0325031	0.0335013	0.0299584	0.0310314	0.0403887	0.035407
noise_and_sig_rep7	0.0233153	0.0252582	0.0243793	0.0219861	0.0235112	0.0256569	0.029546	0.0223057	0.0323206	0.0316856	0.0361695	0.0292497	0.0279604	0.0299405	0.0386893	0.0312624
noise_and_sig_rep8	0.023039	0.0234924	0.0220911	0.0224182	0.0247429	0.025757	0.0293629	0.0213379	0.0317706	0.0316342	0.0288993	0.028622	0.0286671	0.0338576	0.0364704	0.0322508
noise_and_sig_rep9	0.0230254	0.0269286	0.0278091	0.0238772	0.0227174	0.0248764	0.0298482	0.0232161	0.034412	0.0360167	0.0371444	0.0298182	0.0297532	0.0315391	0.0385395	0.0292789
noise_and_sig_rep10	0.0248405	0.0268878	0.0247313	0.0239383	0.0221513	0.0263805	0.0284024	0.0235365	0.031907	0.0327021	0.0289026	0.0328628	0.0301918	0.0322184	0.0358443	0.0338411
noise_and_sig_rep11	0.0244596	0.0250306	0.0242998	0.0231973	0.0235418	0.025192	0.0274936	0.023008	0.0331566	0.0306278	0.029586	0.0308511	0.0289414	0.0326962	0.0342801	0.0326047
noise_and_sig_rep12	0.0234596	0.0260559	0.0245608	0.0239762	0.0222965	0.0246261	0.0313177	0.0215628	0.0305798	0.0363678	0.0349852	0.0283043	0.0284738	0.0327477	0.0364355	0.0336665
noise_and_sig_rep13	0.0231895	0.024071	0.0243556	0.0216663	0.0221341	0.0260184	0.0305629	0.0241626	0.0345474	0.033727	0.0318655	0.0312087	0.030973	0.030678	0.0360509	0.0296531
noise_and_sig_rep14	0.0237044	0.0245465	0.0238126	0.0225756	0.0233918	0.0258979	0.0292702	0.0250936	0.0351927	0.0302075	0.0312347	0.0307168	0.0301378	0.0318838	0.0369538	0.0330729
noise_and_sig_rep15	0.0234397	0.0229831	0.0229445	0.023657	0.0230561	0.02582	0.0302444	0.0224476	0.0351372	0.03101	0.0301242	0.0307562	0.0298361	0.0306482	0.0355805	0.0332403
noise_and_sig_rep16	0.0247868	0.0249195	0.0247515	0.0240851	0.0231479	0.0231513	0.0287844	0.0257479	0.0304923	0.0309546	0.0312976	0.030178	0.0294163	0.0287806	0.0351399	0.0330783
noise_and_sig_rep17	0.0255314	0.0250414	0.0238533	0.0229992	0.0223514	0.0257165	0.0296242	0.0225118	0.0327	0.0291316	0.0310747	0.0310539	0.0302968	0.030537	0.0365464	0.034382
noise_and_sig_rep18	0.0224924	0.0252387	0.024494	0.0233253	0.0244347	0.0250346	0.0283693	0.023171	0.0320552	0.0324799	0.0307387	0.0341342	0.0308826	0.0318803	0.0361522	0.0327472
noise_and_sig_rep19	0.0234275	0.0232433	0.0216454	0.0215712	0.0248694	0.0255139	0.0317051	0.0227506	0.0323598	0.0311799	0.029545	0.0304271	0.0331256	0.0284339	0.0390443	0.0295441
noise_and_sig_rep20	0.0223561	0.0236812	0.0231242	0.0224581	0.0218162	0.0253945	0.0309627	0.0229264	0.0326617	0.0342771	0.0300327	0.0299695	0.0295021	0.0301705	0.0363464	0.0310505

## Sheet: fly12
	Masker-ipsilateral Ear								Masker-contralateral Ear
Epoch	First Signal Alone	Masker Alone	-18dB SNR	-12dB SNR	-6dB SNR	0dB SNR	+6dB SNR	Last Signal Alone	First Signal Alone	Masker Alone	-18dB SNR	-12dB SNR	-6dB SNR	0dB SNR	+6dB SNR	Last Signal Alone
noise_alone_rep1	0.0156405	0.0194257	0.0151326	0.017103	0.0182582	0.0220011	0.0246476	0.012976	0.0251544	0.0363636	0.0271735	0.0307803	0.0307449	0.0386755	0.0389161	0.0229171
noise_alone_rep2	0.0166531	0.0198218	0.0153195	0.0175797	0.0183522	0.0216489	0.024547	0.0129895	0.027101	0.0300966	0.0260462	0.0287796	0.0296349	0.0358333	0.0380164	0.0252545
noise_alone_rep3	0.0203814	0.0198572	0.0156725	0.0161996	0.0193179	0.0210119	0.0260458	0.0140716	0.0354611	0.0344289	0.0268859	0.0281662	0.0325451	0.0332013	0.0376352	0.0250163
noise_alone_rep4	0.0179917	0.0204091	0.0148081	0.0154495	0.017835	0.0208904	0.0231839	0.0128011	0.0298938	0.0346463	0.0277896	0.0295276	0.0305152	0.0332779	0.0359669	0.0230204
noise_alone_rep5	0.0156538	0.019523	0.0145977	0.0184041	0.0192421	0.0207482	0.0246821	0.0132652	0.0302706	0.0325499	0.0247422	0.0295495	0.03098	0.032804	0.0354751	0.0245188
noise_alone_rep6	0.0187278	0.020779	0.0160254	0.0157283	0.0192453	0.0211127	0.0238288	0.0127975	0.0303273	0.035114	0.0282018	0.0283355	0.0313403	0.036365	0.0390203	0.0244686
noise_alone_rep7	0.0163934	0.0194284	0.0147673	0.0167285	0.0189922	0.020711	0.0241769	0.0141049	0.0277597	0.0282249	0.02768	0.028359	0.0321673	0.0366422	0.0369036	0.0237784
noise_alone_rep8	0.0167546	0.019085	0.0145982	0.0162644	0.0176337	0.0190461	0.0255397	0.0130135	0.0279502	0.0322048	0.0242921	0.0284212	0.0306874	0.0326597	0.0388746	0.0233768
noise_alone_rep9	0.0196757	0.0197993	0.015953	0.0161477	0.0190107	0.0197707	0.0232767	0.0134822	0.033593	0.0350292	0.0235657	0.0267276	0.0328636	0.032484	0.037209	0.0235835
noise_alone_rep10	0.0163803	0.0195782	0.0149083	0.0157738	0.0170444	0.0200316	0.0239865	0.0140141	0.0278738	0.0309551	0.0262146	0.0324102	0.0280106	0.0363119	0.037022	0.0242857
noise_alone_rep11	0.017812	0.0187502	0.0155092	0.0165297	0.0190313	0.0197913	0.0243444	0.0132613	0.0288718	0.0325067	0.0287993	0.0294357	0.0324942	0.0324263	0.0387577	0.0237074
noise_alone_rep12	0.0166762	0.01855	0.0151277	0.0162484	0.018297	0.0213005	0.0240432	0.013601	0.0273043	0.0286006	0.0259554	0.0287733	0.0310295	0.0346654	0.0360924	0.0231673
noise_alone_rep13	0.0177241	0.0179506	0.0139369	0.0167753	0.0188417	0.0194388	0.0246973	0.0137971	0.0305338	0.031604	0.0226571	0.0292054	0.031214	0.0311433	0.0365417	0.0243417
noise_alone_rep14	0.0176884	0.0189558	0.0151053	0.0180114	0.0178516	0.0205469	0.021996	0.0136524	0.0317329	0.032382	0.0276578	0.0305597	0.0304512	0.0336168	0.0321392	0.0226909
noise_alone_rep15	0.0177818	0.0188496	0.0151982	0.0166234	0.0189002	0.0219114	0.0239338	0.0146539	0.0314419	0.0308472	0.0267623	0.0273466	0.0313293	0.0383982	0.0350879	0.0243606
noise_alone_rep16	0.0187305	0.0195126	0.0148364	0.0178581	0.0179502	0.0207508	0.0249241	0.0134284	0.0318714	0.033058	0.0249081	0.029312	0.0294942	0.033808	0.0347829	0.0236408
noise_alone_rep17	0.0178054	0.0199739	0.0158534	0.0165512	0.0192858	0.0211546	0.0234478	0.014389	0.0320095	0.03286	0.0271445	0.0282394	0.0318453	0.0354569	0.0346123	0.0239486
noise_alone_rep18	0.0186578	0.0192867	0.0149588	0.0178034	0.0175672	0.0210076	0.0245257	0.0129211	0.0306325	0.0331863	0.0243784	0.0283953	0.0311691	0.0348581	0.0373142	0.0223098
noise_alone_rep19	0.019871	0.0183387	0.0159996	0.0163147	0.0190658	0.0221985	0.0235068	0.0137276	0.0319741	0.0322862	0.0285663	0.0270956	0.0327791	0.0328661	0.0341655	0.0250561
noise_alone_rep20	0.0165718	0.0186177	0.0159144	0.0151278	0.0192431	0.0197301	0.0256898	0.0134838	0.0287962	0.0306128	0.0266047	0.0288285	0.0324108	0.0356652	0.0383446	0.022878
noise_and_sig_rep1	0.0232296	0.0191694	0.0175713	0.0168532	0.0184383	0.0206177	0.0264325	0.0170281	0.0391729	0.0313682	0.0308356	0.0284004	0.0337289	0.032877	0.0398878	0.0328758
noise_and_sig_rep2	0.022417	0.0186753	0.0173375	0.0181853	0.0187772	0.0201916	0.0232357	0.0163092	0.0348746	0.0321092	0.0304208	0.0313254	0.0317064	0.0339392	0.037507	0.0301
noise_and_sig_rep3	0.023244	0.0199788	0.0189512	0.0169564	0.0190518	0.0218591	0.0245671	0.0169746	0.0421149	0.032472	0.0342839	0.0326979	0.0321923	0.0347996	0.0404085	0.0288246
noise_and_sig_rep4	0.022497	0.0181106	0.0172331	0.0168718	0.0179744	0.019496	0.0236757	0.0169126	0.0396977	0.0306579	0.0288979	0.0343128	0.0319515	0.0346044	0.0369302	0.030859
noise_and_sig_rep5	0.0211144	0.0188024	0.0181328	0.0193187	0.0198865	0.021852	0.026432	0.0163882	0.0367468	0.0320164	0.0306099	0.0322822	0.0325714	0.03384	0.0389259	0.0297361
noise_and_sig_rep6	0.0223412	0.0186199	0.0186111	0.019303	0.0192077	0.0223381	0.0243546	0.0152351	0.0368908	0.0319274	0.0330747	0.0332445	0.0328855	0.0364901	0.0374278	0.0318506
noise_and_sig_rep7	0.0240691	0.0172339	0.0179771	0.0188205	0.0205637	0.0194338	0.0247223	0.0158394	0.0423396	0.0300009	0.0334505	0.0330545	0.0337901	0.0332086	0.0381537	0.0295162
noise_and_sig_rep8	0.0222963	0.0191974	0.0155983	0.0172867	0.0183283	0.0206329	0.0251417	0.0159338	0.0391847	0.031398	0.0299638	0.0284517	0.0322953	0.0333663	0.0378392	0.0281407
noise_and_sig_rep9	0.0230625	0.0191989	0.0159105	0.0169745	0.018867	0.0207636	0.0239727	0.0156874	0.0371959	0.0314494	0.0285621	0.0315752	0.030904	0.032833	0.0381034	0.0289124
noise_and_sig_rep10	0.0217904	0.0191273	0.0169036	0.0187449	0.0178961	0.0211173	0.0240278	0.0177424	0.035818	0.0310436	0.0298726	0.0327688	0.0316581	0.0339967	0.0363927	0.0286407
noise_and_sig_rep11	0.0244707	0.0189099	0.0169951	0.0185327	0.0184747	0.0211674	0.0260607	0.0166779	0.0388735	0.0302915	0.0303715	0.0326902	0.0313896	0.0345376	0.0380199	0.0310927
noise_and_sig_rep12	0.0217699	0.0181829	0.0171859	0.0173246	0.0194954	0.0200416	0.0247896	0.0175457	0.0379846	0.0283769	0.0321331	0.032762	0.0336325	0.0323677	0.0370775	0.0325001
noise_and_sig_rep13	0.0217687	0.0194707	0.0176539	0.0177418	0.019273	0.0199603	0.0235716	0.0162392	0.0346095	0.0303204	0.031434	0.0330488	0.0324964	0.0330116	0.0362723	0.0313135
noise_and_sig_rep14	0.0248565	0.018754	0.0168703	0.0185831	0.0178358	0.0211203	0.0242455	0.0167026	0.0429446	0.0316818	0.0304958	0.0329326	0.0304663	0.0352211	0.0375345	0.031294
noise_and_sig_rep15	0.0229911	0.0200481	0.0167103	0.0170484	0.019398	0.0189384	0.024618	0.019359	0.0398304	0.0319769	0.0314316	0.0316932	0.0326538	0.0299417	0.0366782	0.0348012
noise_and_sig_rep16	0.0224263	0.0193347	0.0176068	0.017394	0.018883	0.0199883	0.0237455	0.0197035	0.0366487	0.0318399	0.029957	0.0341219	0.0303311	0.0332194	0.0347805	0.0364704
noise_and_sig_rep17	0.0236715	0.0175124	0.0163544	0.0179538	0.0180563	0.0203553	0.0231216	0.0167897	0.0399031	0.0301346	0.0292121	0.0341291	0.0313457	0.0331195	0.0370654	0.0299843
noise_and_sig_rep18	0.024516	0.0188488	0.0172282	0.0191256	0.0185893	0.0201103	0.0240088	0.0177563	0.0416724	0.0316802	0.0312691	0.0331478	0.0317352	0.0323474	0.0369238	0.0301362
noise_and_sig_rep19	0.0233331	0.0185219	0.017847	0.0169309	0.0200333	0.0202468	0.0242553	0.0158567	0.0403595	0.0304915	0.0339663	0.0275682	0.0326698	0.0325407	0.0356006	0.0321757
noise_and_sig_rep20	0.0229677	0.0191531	0.0174192	0.0171192	0.0200715	0.020985	0.0249484	0.0156993	0.0380268	0.0324005	0.0307033	0.028322	0.0361842	0.0323598	0.0349777	0.0284292
