# Supplementary material for: How spatial release from masking may fail to function in a highly directional auditory system
Source: eLife journal article supplement (doi:10.7554/elife.20731), 2017-04-20
Supplement: supp [file elife_poa_e20731_Figure_7_source_data_2.xlsx]

## Sheet: mid_angular_headings
In Radians	Signal Alone	Masker Alone	-6dB SNR Grouped	0dB SNR Grouped	+6dB SNR Grouped	-6dB SNR Separated	0dB SNR Separated	+6dB SNR Separated
fly1	0.0251092	0.2152	-0.0539475	0.186238	-0.150145	-0.246299	-0.118714	-0.0971482
fly2	0.0580807	0.180372	-0.101831	0.0314095	-0.0380517	0.387573	0.00599986	-0.0129884
fly3	0.0821848	-0.096323	-0.178226	-0.24004	-0.0042216	-0.32582	-0.058086	-0.0552384
fly4	0.176932	0.428441	-0.0249562	-0.0143274	0.00819723	-0.453304	-0.255416	-0.185107
fly5	-0.0870884	-0.102856	-0.536327	-0.0148942	-0.043126	-0.246554	-0.360371	-0.0815431
fly6	0.0300066	-0.0320652	-0.703461	-0.0829199	-0.11282	0.165745	-0.140429	0.0288957
fly7	0.270681	-0.250989	-0.356876	-0.207684	-0.089376	-0.904925	-0.264656	-0.180829
fly8	0.0231818	0.0876099	-0.753794	-0.393771	-0.226691	-0.598703	0.260341	-0.151009
fly9	0.00842994	-0.304377	0.489174	-0.178549	-0.0698897	0.0862289	-0.33894	-0.428602
fly10	0.0227966	0.0070424	-0.154557	-0.0869951	-0.0132209	-0.886943	-0.19158	-0.251454
fly11	0.0378248		-0.250135	-0.141411	-0.222218	0.138614	-0.729451	-0.302634
fly12	-0.0469592			-0.194582	-0.0843628		-0.425824	-0.351179
fly13	0.0195631			-0.223117			-0.275975	-0.287507
CircStat- Matlab Output
mean	0.0476	0.0127	-0.2408	-0.1202	-0.0871	-0.2607	-0.2224	-0.1812
angular deviation	0.0873	0.21	0.3288	0.1407	0.0755	0.4041	0.2248	0.132
std	0.0874	0.2112	0.334	0.141	0.0755	0.4128	0.2263	0.1323
Degrees
mean	2.7286	0.7263	-13.7943	-6.8857	-4.9912	-14.9369	-12.7419	-10.3811
angular deviation	5.0015	12.0316	18.8406	8.0597	4.3245	23.1551	12.8808	7.5651
std	5.0062	12.0988	19.103	8.0794	4.3245	23.6499	12.9633	7.5817
